# Supplementary material for: The Drosophila brain on cocaine at single-cell resolution
Source: Genome Res. 2021 Oct;31(10):1927–37. doi: 10.1101/gr.268037.120 (PMC8494231; doi:10.1101/gr.268037.120)
Supplement: Supplemental Material [file supp_gr.268037.120_Supplemental_Table_S1_xlsx.xlsx]

## Sheet: A. Climbing Assay
rep trt	♀(Cocaine) time(s)	Event	♀(Sucrose) time(s)	Event	♂(Cocaine) time(s)	Event	♂(Sucrose) time(s)	Event
1	2.2		12.62		12.97		dnf
2	4.11		20.64		dnf		23.74
3	9.99		5.87		5.69		4.06
4	3.5		11.16		10.07		dnf
5	8.47		6.28		dnf	seizure	7.73
6	dnf		5.85		5.39		8.06
7	2.92		7.3		23.53		6.53
8	18.28		14.54		14.55		3.13
9	dnf		dnf		dnf		17.46
10	dnf		3.19		4.39		6.46
11	8.91		dnf	seizure	9.76		8.35
12	19.42	seizure	13.52		dnf	seizure	12.13
13	3.76		7.23		10.05		dnf
14	4.03		3.59		4.05		dnf
15	11.22		4.97		dnf		dnf
16	12.75		3.63		dnf		dnf
17	5.85		2.7		4.35		11.57
18	3.36		9.69		4.7		2.29
19	15.48		3.76		4.52		18.59
20	4.69		5.57		20.35		dnf
21	5.69		4.83		5.36		dnf
22	15.58		4.97		5.19		dnf
23	14.4		8.47		dnf		dnf
24	6.59		9.9		24.92		4.5
25	4.13		dnf		11.4		2.46
26	3.02		dnf		16.32	seizure	9.39
27	2.23		11.48		4.93		21.24
28	3.93		13.6		18.17		5.87
29	dnf	seizure	14.09		9.12		10.7
30	6.16		20.72		dnf		9.72
31	4.39		dnf		26.57		15.39
32	2.6		25.15		dnf		16.56
33	8.03		4.9		14.34		12.03
34	4.99		7.9		6.49		dnf
35	dnf		5.26		dnf		28.62
36	8.9		4.22		29.7		dnf
37	6.29		3.58		21.66		dnf
38	8.56		20.15		13.34		dnf
39	9.35		4.3		dnf		16.79
40	18.82		2.6		8.7		dnf
41	6.1		dnf		4.32		4.4
42	dnf	seizure	5.45		29.53		2.82
43	25.34		10.13		25.95	grooming	dnf
44	7.53		dnf		dnf		4.4
45	20.81		21.39		dnf		22.68
46	4.25		4.15		4.92		dnf
47	dnf	grooming	6.89		6.06		4.02
48	dnf	grooming	28.73		18.45		28.66
49	5.6		dnf		dnf	grooming	29.11
50	5.46		21.52		dnf		18.15	grooming
51	4		5.3		28.13		6.56
52	17.65		dnf		12.35	grooming	8.47
53	5.16		dnf		22.28		22.43
54	5.69		16.5		17.7		6.6
55	5.57		26.59		dnf		8.8
56	13.99		14.9		29.16	seiz.,groom	11.83
57	26.03	seizure	4.95		12.32		4.46
58	dnf		dnf		12.7		10.33
59	dnf		7.19		14.32		5.23
60	9.73		dnf		3.12		2.63
61	4.57		3.73		9.73		9.6
62	27.54	grooming	21.23		dnf	seiz.,groom	6.02
63	27.54		dnf		dnf		13.66
64	dnf		10.8		dnf	grooming	8.99
65	24.79		dnf		3.75		4.72
66	1.55		dnf		4.13		4.72
67	3.93		20.92		26.05	seizure	dnf
68	17.61		5.32		18.91		13.87
69	dnf		dnf		7.23		11.43
70	4.72		21.47		4.5		2.75
71	4.56		14.92		7.65		12.65
72	4.4		5.18		10.83	seizure	3.02
73	dnf		dnf	grooming	dnf	grooming	18.63
74	dnf	seizure	dnf		dnf	grooming	3.97
75	7.29		2.96		5.52		6.17
76	dnf		9.96		23.2	grooming	5.46
77	4.25		11.9		3.78		6.45
78	dnf	grooming	10.02		dnf		6.12
79	10.99		4.33		12.13		7.43
80	4.25		26.72		dnf		dnf
81	7.35		12.77		5.98		4.59
82	dnf	seizure	4.16		13.95		7.8
83	14.14		6.69		3.9		2.62
84	7.4		4.43		9.13		7.26
85	29.83		9.6		10.43		5.39
86	15.96		dnf		7.22		4.19
87	25.79	grooming	9.9		27.98		5.27
88	5.43		5.12		7.45		2.02
89	5.02		11.52		dnf		13.46
90	5.83		16.97		6.38		4.63
91	10.03		3.83		3.46		10.13
92	6.22		5.37		11.39		14.23
93	7.8		4.83		11.29		14.63
94	dnf		13.84	grooming	6.54		21.83
95	13.46		12.8		dnf		4.26
96	28.03		3.62		4.75		7.9
97	dnf	grooming	4.25		5.36		5.5
98	25.09	grooming	8.03		3.92		17
99	11.72		3.39		7.33		20
100	13.2		5.63		5.6		3.16
101	4.75		5.75		5.33		3.32
102	dnf		12.96		4.47		3.13
103	6.12		7.62		5.52		2.93
104	11.53		6.9		8.63		3.19
105	10.46		5.76		4.13		6.99
106	4.12		5.59		5.3		4.06
107	8.95		22.83	grooming	dnf	grooming	2.83
108	6.45		4.67		6.2		4.42
109	7.13		6.72		4.121		6.73
110	7.52		4.53		3.76		3.29
111	6.65		5.09		3.92		3.59
112	7.7		4.89		7.67		18.55
113	14.08		dnf		21.35	seizure	7.1
114	dnf	grooming	5.73		5.66		5.96
115	5.75		8.9		5.4		6.05
116	dnf		8.92		2.66		5.54
117	5.23		6.27		3.4		7.19
118	23.07		6.66		7.99		3.75
119	dnf		14.14		15.73		9.7
120	15.38		dnf		dnf	grooming	6.35
121	dnf	grooming	6.23		4.75		5.38
122	dnf		4.69		8.38		7.23
123	5.36		6.77		8.28		2.89
124	10.83		3.58		10.97		10.92
125	10.37		5.22		10.02		5.25
126	6.62		6.23		4.1		8.82
127	19.06		8.73		7.02		5.26
128	9.97		9.8		dnf	seizure	6.83
129	dnf	seizure	dnf		11.92		14.66
130	7.36		10.76		9.02		10.52
131	8.93		3.55		13.36		7.2
132	6.73		4.12		11.12		14.3
133	4.5		6.5		dnf		8.76
134	9.03		28.2		6.23		5.79
135	4.09		4.47		19.65		5.67
136	dnf		7.66		6.84		4.24
137	7.85		7.15		dnf	grooming	9.32
138	21.14		9.8		14.55		dnf
139	22.36	grooming	6.12		14.59		6.77
140	7.27		12.39		13.02		9.33
141	15.3		2.72		25.68		8.9
142			18.05		7.3		7.72
143					5.02		6.92
144					dnf	seizure	2.57
145					dnf		4.21
146					16.23		16.31
147					6.65		dnf
148					15.5		5.39
149					8.38		dnf
150					21.85		7.1
151					5.02		dnf
152					15.57		3.73
153					11.95		12.36
154					16.12		12.63
155					9.85		6.12
156					11.09		7.49
157					11.72		5.13
158					6.85		dnf
159					dnf	grooming	10.121
160					7.76		12.86
161					26.06		5.19
162							11.32
163							10.32
164							7.35
165							dnf
166							3.47

## Sheet: B. Startle Assay
rep trt	♀(Cocaine) time moving(s)	Event	♀(Sucrose) time moving(s)	Event	♂(Cocaine) time moving(s)	Event	♂(Sucrose) time moving(s)	Event
1	28.33		44.72		42.68		45
2	45		40.47		43.63		44.2
3	36.92	grooming	44.42		40		45
4	44.9		43.65		25.19	grooming	43.34
5	36.02		37.72		33.74		42.77
6	43.87		43.61		21.75		43.1
7	44.23		40.63		39.41		40.25
8	41.75		45		26.38		43.57
9	39.55	seizure	41.76		43.35		42.1
10	45		42.59		34.42		45
11	43.46		34.3		33.28	grooming	41.46
12	45		41.75		5.22	grooming	44.77
13	30.78		40.48		43.78		43.99
14	32.76		43.46		22.47	grooming	34.49
15	40.01		34.81		45		41.69
16	43.27		39.02	grooming	45		45
17	13.698		33.35		41.15		43.99
18	42.44		39.04		23.98		45
19	45		40.81		45		44.37
20	1.35	grooming	40.7		43.04		43.26
21	5.81	grooming	44.24		23.22	grooming	45
22	11.62	grooming	43.06		37.5		36.3
23	40.79		39.25		9.32	grooming	41.9
24	30.81		36.29	grooming	39.74		36.54
25	27.85		44.27		24.22	grooming	42.05
26	35.8		40.86		44.2		42.28
27	29.93	grooming	37.91	grooming	43.57		45
28	41.83		42.48		7.9	grooming	44.78
29	38.87		42.1		22.58	grooming	45
30	45		41.54		43.25		45
31	43.47		39.73		43.43		35.82
32	41.7		28.9	grooming	37.19		43.24
33	45		43.55		43.85		41.14
34	45		44.32		2.15	grooming	45
35	39.92		26.49	grooming	41.3		45
36	45		40.75		39.22		44.05
37	40.14		36.64		35.63		44.83
38	20.73		40.58		12.28	seizure	44.25
39	44.22	seizure	42.8		42.47		45
40	43.68		37.54		40.03		42.09
41	12.62	grooming	40.23		45		45
42	45		43.95		37.71		44.09
43	19.55		43.49		40.88		43.66
44	35.3		44.55		38.85		41.87
45	45		45		45		44.87
46	43.37		45		12.43	grooming	45
47	40.84		43.4		43.47		40.13
48	45		44.89		36.54		45
49	45		45		39.82		37.74
50	45		45		44.02		45
51	45		45		28.05		40.49
52	45		45		37.58		45
53	38.17		45		45		43.74
54	42.97		45		34.14		43.65
55	3.05		42.49		41.9		43.37
56	45		17.02		39.46		44.57
57	42.01		44.85		40.97		25.45
58	45		36.61		36.77		27.85
59	41.82		45		41.97		36.29
60	44.68		42.39		41.6		27.55
61	41.9		43.21		23.34		40.8
62	42.54		44.66		39.36		36.72
63	45		44.6		34.64		37.56
64	44.44		38.83		33.82		34.21
65	45		39.51		26.38	grooming	28.28
66	45		43.05		39.71		43.97
67	45		45		40.83		25.85	grooming
68	45		32.8		5.43	seizure	43.39
69	45		23.85		37.47		29.67
70	38.35		41.32		39.82		45
71	24.06	grooming	33.05		36.47		40.55
72	32.19		41.67		28.3		23.07
73	37.41		45.09		5.49	grooming	44.86
74	32.37		45		17.93		35.06
75	35.53		43.07		39.51		33.75
76	38.23		36.55		27.15	seizure	37.89
77	4.36	seizure	37.64		18.25		42.67
78	41.33		42.33		36.01		27.35
79	24.41	grooming	29.61	grooming	29.84		37.03
80	17.8	grooming	28.9		39.86		36.58
81	42.42		16.43		25.84		44.32
82	34.49		32.39		23.82		42.49
83	21.08		33.72		31.12		43.89
84	13.31		38.94		28.8		39.27
85	42.32		43.35		21.74		42.59
86	32.93		44.72		31.58		38.25
87	34.13		27.33		31.59		33.74
88	41.45		44.45		19.79		40.98
89	38.87		36.05		8.33	grooming	34.55
90	36.74		31.78		5.54	grooming	43.53
91	37.76		21.01		33.13		45
92	36.83		35.94		33.55		42.94
93	39.13		40.53		41.29		40.38
94	30.09	seizure	36.57		7.55	grooming	35.49
95	35.62		39.78		31.24		26.92
96	35.76		34.05		20.39		34.99
97	31.18		32.59		29.14		32.12
98	25.83		37.41		19.56	seizure	44.48
99	23.95		38.48		30.82		29.15
100	40.46		44.66		11.6	grooming	36.44
101	39.05		34.62		38.95		33.45
102	21.92	seizure	41.23		17.87	grooming	43.95
103	15.37		45		38.99		42.63
104	20.31	seizure	36.42		35.66		43.93
105	29.87		44.3		36.58		43.82
106	37.29		45		25.75		41.92
107	15.42		32.76		27.04		38.02
108	19.61		39.14		31.33		42.9
109	29.46		41.35		31.83		41.47
110	32.09		40.51		31.44		40.3
111	24.21		44.08		26.16		33.56
112	33.86		43.43		18.72	grooming	42.68
113	27.22		36.76		38.21		45
114	37.82		43.94		32.68		39.36
115	38.15		37.66		9.09	grooming/seizure	40.99
116	39.8		34.39		26.62		39.76
117	42.6		42.17		26.58		36.27
118	34.18		37.84		33.11		38.01
119	30.89		44.44		42.89		33.08
120	24.32		44.42		27.96		41.04
121	37.94		40.87		33.15
122	27.25		38.6		40.51
123	24.82		31.71		31.37
124	33.76		43.82
125	32.21		42.12
126	40.49		35.81
127	31.79		31.99
128	9.17		43.92
129	41.97		42.75
130	37.83		38.48
131	28.54		44.65
132	31.46		42.24
133	28.59		35.7
134	40.52		40.87
135	6.63	grooming	32.53
136	35.84		42.03
137	31.55		29.59
138	22.87		40.43
139	44.05		44.39
140	32.45		37.74
141	32.27		39.27
142	38.23		38.64
143	39.02		45
144	37.25		29.51
145	41.45		39.24
146			40.48
147			44.39
148			13.23
149			37.83
150			40.36
151			42.71
152			30.8
153			43.08
154			39.24
155			40.01
