# Supplementary material for: The Drosophila brain on cocaine at single-cell resolution
Source: Genome Res. 2021 Oct;31(10):1927–37. doi: 10.1101/gr.268037.120 (PMC8494231; doi:10.1101/gr.268037.120)
Supplement: Supplemental Material [file supp_gr.268037.120_Supplemental_Table_S3_xlsx.xlsx]

## Sheet: Table S2
Differentially Expressed Genes in Males					Differentially Expressed Genes in Females
FlyBase ID	Fly Gene Symbol	Human Gene Symbol	DIOPT Score		FlyBase ID	Fly Gene Symbol	Human Gene Symbol	DIOPT Score
FBgn0000028	acj6	POU4F2	12		FBgn0000024	Ace	BCHE	10
FBgn0000028	acj6	POU4F3	12		FBgn0000028	acj6	POU4F2	12
FBgn0000037	mAChR-A	CHRM5	11		FBgn0000028	acj6	POU4F3	12
FBgn0000037	mAChR-A	CHRM1	11		FBgn0000064	Ald1	ALDOC	13
FBgn0000037	mAChR-A	CHRM3	11		FBgn0000064	Ald1	ALDOA	13
FBgn0000042	Act5C	ACTB	11		FBgn0000120	Arr1	ARRB2	6
FBgn0000045	Act79B	ACTBL2	6		FBgn0000121	Arr2	ARRB2	5
FBgn0000045	Act79B	ACTB	6		FBgn0000121	Arr2	SAG	5
FBgn0000064	Ald1	ALDOC	13		FBgn0000153	b	CSAD	13
FBgn0000064	Ald1	ALDOA	13		FBgn0000179	bi	TBX2	11
FBgn0000083	AnxB9	ANXA11	10		FBgn0000422	Ddc	DDC	14
FBgn0000083	AnxB9	ANXA7	10		FBgn0000547	ed	None	< 3
FBgn0000097	aop	ETV6	10		FBgn0000565	Eip71CD	MSRA	11
FBgn0000116	Argk	CKM	11		FBgn0000567	Eip74EF	ELF2	7
FBgn0000121	Arr2	ARRB2	5		FBgn0000633	CG17716	None	< 3
FBgn0000121	Arr2	SAG	5		FBgn0001078	ftz-f1	NR5A1	11
FBgn0000179	bi	TBX2	11		FBgn0001078	ftz-f1	NR5A2	11
FBgn0000241	bw	ABCG2	3		FBgn0001085	fz	FZD1	13
FBgn0000241	bw	ABCG1	3		FBgn0001085	fz	FZD7	13
FBgn0000287	salr	SALL1	10		FBgn0001091	Gapdh1	GAPDH	12
FBgn0000299	Col4a1	COL4A1	9		FBgn0001149	GstD1	GSTT2	3
FBgn0000303	ChAT	CHAT	14		FBgn0001149	GstD1	GSTT4	3
FBgn0000422	Ddc	DDC	14		FBgn0001149	GstD1	GSTT2B	3
FBgn0000454	Dip-B	NPEPL1	3		FBgn0001186	Hex-A	GCK	13
FBgn0000459	disco	BNC2	10		FBgn0001224	Hsp23	CRYAB	7
FBgn0000489	Pka-C3	PRKX	14		FBgn0001225	Hsp26	CRYAB	6
FBgn0000535	eag	KCNH1	13		FBgn0001225	Hsp26	CRYAA	6
FBgn0000547	ed	None	< 3		FBgn0001226	Hsp27	HSPB6	4
FBgn0000565	Eip71CD	MSRA	11		FBgn0001226	Hsp27	CRYAB	4
FBgn0000567	Eip74EF	ELF2	7		FBgn0001226	Hsp27	CRYAA	4
FBgn0000633	CG17716	None	< 3		FBgn0001226	Hsp27	HSPB1	4
FBgn0000635	Fas2	NCAM2	11		FBgn0001226	Hsp27	HSPB2	4
FBgn0000635	Fas2	NCAM1	11		FBgn0001229	Hsp67Bc	CRYAA	5
FBgn0000636	Fas3	NECTIN3	3		FBgn0001234	lncRNA:Hsromega	None	< 3
FBgn0000659	fkh	FOXA2	12		FBgn0001263	inaD	LNX1	4
FBgn0000719	fog	None	< 3		FBgn0001263	inaD	LNX2	4
FBgn0000721	for	PRKG1	13		FBgn0001263	inaD	PATJ	4
FBgn0001078	ftz-f1	NR5A1	11		FBgn0001263	inaD	MPDZ	4
FBgn0001078	ftz-f1	NR5A2	11		FBgn0002543	robo2	ROBO1	6
FBgn0001085	fz	FZD1	13		FBgn0002543	robo2	ROBO3	6
FBgn0001085	fz	FZD7	13		FBgn0002643	mam	None	< 3
FBgn0001090	bnb	None	< 3		FBgn0002868	MtnA	None	< 3
FBgn0001091	Gapdh1	GAPDH	12		FBgn0002936	ninaA	PPIB	5
FBgn0001104	Galphai	GNAI1	12		FBgn0002936	ninaA	PPIC	5
FBgn0001104	Galphai	GNAI3	12		FBgn0002938	ninaC	MYO3A	12
FBgn0001138	grn	GATA3	10		FBgn0002940	ninaE	OPN4	12
FBgn0001138	grn	GATA2	10		FBgn0003091	Pkc53E	PRKCA	15
FBgn0001145	Gs2	GLUL	14		FBgn0003165	pum	PUM2	12
FBgn0001149	GstD1	GSTT2	3		FBgn0003301	rut	ADCY1	12
FBgn0001149	GstD1	GSTT4	3		FBgn0003380	Sh	KCNA1	11
FBgn0001149	GstD1	GSTT2B	3		FBgn0003429	slo	KCNMA1	13
FBgn0001168	h	HES4	9		FBgn0003499	sr	EGR2	6
FBgn0001186	Hex-A	GCK	13		FBgn0003861	trp	TRPC4	9
FBgn0001224	Hsp23	CRYAB	7		FBgn0003861	trp	TRPC5	9
FBgn0001225	Hsp26	CRYAB	6		FBgn0003997	hid	None	< 3
FBgn0001225	Hsp26	CRYAA	6		FBgn0004102	oc	OTX1	7
FBgn0001226	Hsp27	HSPB6	4		FBgn0004168	5-HT1A	HTR1A	7
FBgn0001226	Hsp27	CRYAB	4		FBgn0004242	Syt1	SYT2	12
FBgn0001226	Hsp27	CRYAA	4		FBgn0004242	Syt1	SYT1	12
FBgn0001226	Hsp27	HSPB1	4		FBgn0004395	unk	UNK	12
FBgn0001226	Hsp27	HSPB2	4		FBgn0004449	Ten-m	TENM2	13
FBgn0001229	Hsp67Bc	CRYAA	5		FBgn0004449	Ten-m	TENM1	13
FBgn0001234	lncRNA:Hsromega	None	< 3		FBgn0004516	Gad1	GAD1	14
FBgn0001235	hth	MEIS2	11		FBgn0004573	5-HT7	HTR7	6
FBgn0001235	hth	MEIS1	11		FBgn0004595	pros	PROX1	10
FBgn0001297	kay	FOSL2	6		FBgn0004607	zfh2	ZFHX4	12
FBgn0001297	kay	FOS	6		FBgn0004607	zfh2	ZFHX3	12
FBgn0001297	kay	FOSL1	6		FBgn0004619	GluRIA	GRIA3	14
FBgn0002023	Lim3	LHX4	9		FBgn0004646	ogre	None	< 3
FBgn0002121	l(2)gl	LLGL1	15		FBgn0004652	fru	None	< 3
FBgn0002543	robo2	ROBO1	6		FBgn0004852	Ac76E	ADCY2	11
FBgn0002543	robo2	ROBO3	6		FBgn0004858	elB	ZNF703	9
FBgn0002567	Rab32	RAB32	9		FBgn0004882	orb	CPEB1	8
FBgn0002733	E(spl)mbeta-HLH	HES6	6		FBgn0004885	tok	TLL1	11
FBgn0002778	mnd	SLC7A7	9		FBgn0004885	tok	BMP1	11
FBgn0002868	MtnA	None	< 3		FBgn0004910	Eip63F-1	None	< 3
FBgn0002930	nec	SERPINI1	4		FBgn0005614	trpl	TRPC4	10
FBgn0002940	ninaE	OPN4	12		FBgn0005614	trpl	TRPC5	10
FBgn0002945	nkd	NKD1	7		FBgn0010039	GstD3	GSTT2	3
FBgn0003041	pbl	ECT2	15		FBgn0010039	GstD3	GSTT4	3
FBgn0003091	Pkc53E	PRKCA	15		FBgn0010039	GstD3	GSTT2B	3
FBgn0003141	pr	PTS	14		FBgn0010263	Rbp9	ELAVL4	12
FBgn0003162	Pu	GCH1	14		FBgn0010263	Rbp9	ELAVL2	12
FBgn0003165	pum	PUM2	12		FBgn0010300	brat	TRIM3	7
FBgn0003274	RpLP2	RPLP2	12		FBgn0011224	heph	PTBP1	13
FBgn0003301	rut	ADCY1	12		FBgn0011224	heph	PTBP2	13
FBgn0003360	sesB	SLC25A4	12		FBgn0011224	heph	PTBP3	13
FBgn0003463	sog	CHRD	13		FBgn0011656	Mef2	MEF2C	11
FBgn0003499	sr	EGR2	6		FBgn0011656	Mef2	MEF2A	11
FBgn0003651	svp	NR2F2	10		FBgn0011666	msi	MSI2	5
FBgn0003731	Egfr	EGFR	11		FBgn0011693	Pdh	HPGD	14
FBgn0003896	tup	ISL1	14		FBgn0011818	oaf	OAF	13
FBgn0003997	hid	None	< 3		FBgn0013467	igl	SPA17	3
FBgn0004047	Yp3	LIPI	3		FBgn0013686	lrRNA	None	< 3
FBgn0004168	5-HT1A	HTR1A	7		FBgn0013688	srRNA	None	< 3
FBgn0004198	ct	CUX2	11		FBgn0013718	nuf	RAB11FIP4	11
FBgn0004359	T48	None	< 3		FBgn0013733	shot	DST	11
FBgn0004395	unk	UNK	12		FBgn0013995	Calx	SLC8A3	13
FBgn0004449	Ten-m	TENM2	13		FBgn0013995	Calx	SLC8A1	13
FBgn0004449	Ten-m	TENM1	13		FBgn0014163	fax	FAXC	9
FBgn0004509	Fur1	FURIN	10		FBgn0014859	Hr38	NR4A2	13
FBgn0004512	Mdr49	ABCB4	9		FBgn0015229	glec	None	< 3
FBgn0004512	Mdr49	ABCB11	9		FBgn0015519	nAChRalpha3	CHRNA6	9
FBgn0004513	Mdr65	ABCB4	11		FBgn0015766	Msr-110	None	< 3
FBgn0004514	Oct-TyrR	None	< 3		FBgn0015774	NetB	NTN1	11
FBgn0004516	Gad1	GAD1	14		FBgn0015777	nrv2	ATP1B1	12
FBgn0004573	5-HT7	HTR7	6		FBgn0016650	Lgr1	LHCGR	14
FBgn0004580	Cbp53E	CALB2	11		FBgn0016926	Pino	None	< 3
FBgn0004595	pros	PROX1	10		FBgn0017561	Ork1	KCNK17	6
FBgn0004606	zfh1	ZEB2	10		FBgn0017561	Ork1	KCNK16	6
FBgn0004607	zfh2	ZFHX4	12		FBgn0019660	lncRNA:roX2	None	< 3
FBgn0004607	zfh2	ZFHX3	12		FBgn0019662	qm	GGPS1	14
FBgn0004611	Plc21C	PLCB1	13		FBgn0019985	mGluR	GRM3	15
FBgn0004619	GluRIA	GRIA3	14		FBgn0020269	mspo	SPON2	11
FBgn0004629	Cys	None	< 3		FBgn0020299	stumps	PIK3AP1	8
FBgn0004646	ogre	None	< 3		FBgn0020445	E23	ABCG5	3
FBgn0004647	N	NOTCH1	12		FBgn0020445	E23	ABCG8	3
FBgn0004652	fru	None	< 3		FBgn0020445	E23	ABCG2	3
FBgn0004858	elB	ZNF703	9		FBgn0020445	E23	ABCG1	3
FBgn0004880	scrt	SCRT1	8		FBgn0020621	Pkn	PKN2	13
FBgn0004882	orb	CPEB1	8		FBgn0020907	Scp2	None	< 3
FBgn0004885	tok	TLL1	11		FBgn0022355	Tsf1	MELTF	5
FBgn0004885	tok	BMP1	11		FBgn0022382	Pka-R2	PRKAR2A	13
FBgn0004910	Eip63F-1	None	< 3		FBgn0023095	caps	LRRN2	5
FBgn0004914	Hnf4	HNF4G	11		FBgn0023534	CG17778	None	< 3
FBgn0005636	nvy	CBFA2T3	13		FBgn0024150	Ac78C	ADCY8	8
FBgn0005660	Ets21C	ERG	7		FBgn0024189	sns	NPHS1	14
FBgn0005660	Ets21C	FLI1	7		FBgn0024293	Spn43Ab	SERPINI1	4
FBgn0005677	dac	DACH1	12		FBgn0024293	Spn43Ab	SERPINB1	4
FBgn0005771	noc	ZNF503	13		FBgn0024841	Pcd	PCBD1	11
FBgn0005775	Con	None	< 3		FBgn0024944	Oamb	ADRA1A	3
FBgn0008636	hbn	ARX	3		FBgn0025382	Rab27	RAB27A	14
FBgn0010113	hdc	HECA	12		FBgn0025525	bab2	None	< 3
FBgn0010225	Gel	GSN	13		FBgn0025680	cry	CRY2	5
FBgn0010300	brat	TRIM3	7		FBgn0026160	tna	ZMIZ2	13
FBgn0010313	corto	None	< 3		FBgn0026411	Lim1	LHX1	12
FBgn0010387	Acbp2	DBI	8		FBgn0027356	Amph	BIN1	12
FBgn0010411	RpS18	RPS18	14		FBgn0027524	CG3909	WDR61	14
FBgn0010412	RpS19a	RPS19	12		FBgn0027585	CG8740	None	< 3
FBgn0010434	cora	EPB41L1	9		FBgn0027590	GstE12	GSTT2	3
FBgn0010452	trn	LRRN2	5		FBgn0027590	GstE12	GSTT4	3
FBgn0010651	MFS14	SLC17A2	5		FBgn0027590	GstE12	GSTT2B	3
FBgn0010651	MFS14	SLC17A3	5		FBgn0027654	jdp	DNAJC12	11
FBgn0010651	MFS14	SLC17A4	5		FBgn0027843	CAH2	CA1	4
FBgn0010651	MFS14	SLC17A5	5		FBgn0027843	CAH2	CA5B	4
FBgn0010651	MFS14	SLC17A7	5		FBgn0027843	CAH2	CA13	4
FBgn0010651	MFS14	SLC17A8	5		FBgn0027843	CAH2	CA3	4
FBgn0011224	heph	PTBP1	13		FBgn0027843	CAH2	CA2	4
FBgn0011224	heph	PTBP2	13		FBgn0027843	CAH2	CA7	4
FBgn0011224	heph	PTBP3	13		FBgn0027843	CAH2	CA14	4
FBgn0011236	ken	None	< 3		FBgn0028369	kirre	KIRREL3	11
FBgn0011274	Dif	RELB	8		FBgn0028369	kirre	KIRREL1	11
FBgn0011274	Dif	RELA	8		FBgn0028370	kek3	LRRC4C	5
FBgn0011582	Dop1R1	DRD5	9		FBgn0028644	beat-Ic	None	< 3
FBgn0011591	fng	RFNG	15		FBgn0028888	CG4168	None	< 3
FBgn0011656	Mef2	MEF2C	11		FBgn0029092	ced-6	GULP1	9
FBgn0011656	Mef2	MEF2A	11		FBgn0029123	SoxN	SOX2	7
FBgn0011661	Moe	MSN	14		FBgn0029123	SoxN	SOX1	7
FBgn0011666	msi	MSI2	5		FBgn0029663	CG10804	SLC6A18	7
FBgn0011693	Pdh	HPGD	14		FBgn0029723	Proc-R	None	< 3
FBgn0011695	EbpIII	None	< 3		FBgn0029768	SPR	None	< 3
FBgn0011701	repo	None	< 3		FBgn0029824	CG3726	None	< 3
FBgn0011746	ana	None	< 3		FBgn0029922	CG14431	None	< 3
FBgn0011818	oaf	OAF	13		FBgn0029939	CG9650	BCL11B	12
FBgn0011828	Pxn	PXDN	13		FBgn0029950	CG9657	SLC5A8	7
FBgn0011837	Tis11	ZFP36L1	7		FBgn0029950	CG9657	SLC5A12	7
FBgn0011837	Tis11	ZFP36	7		FBgn0029962	CARPA	CA10	10
FBgn0012036	Aldh	ALDH2	15		FBgn0030272	CG15201	None	< 3
FBgn0012344	Dh44	None	< 3		FBgn0030574	sbm	SLC7A9	14
FBgn0013467	igl	SPA17	3		FBgn0030796	CG4829	GGT1	10
FBgn0013686	lrRNA	None	< 3		FBgn0030897	Frq1	NCS1	14
FBgn0013718	nuf	RAB11FIP4	11		FBgn0031016	kek5	None	< 3
FBgn0013733	shot	DST	11		FBgn0031294	IA-2	PTPRN	11
FBgn0013767	Crz	None	< 3		FBgn0031299	CG4629	NIM1K	11
FBgn0013995	Calx	SLC8A3	13		FBgn0031306	CG4577	None	< 3
FBgn0013995	Calx	SLC8A1	13		FBgn0031424	VGlut	SLC17A6	14
FBgn0014011	Rac2	RAC1	12		FBgn0031698	Ncoa6	NCOA6	6
FBgn0014163	fax	FAXC	9		FBgn0031736	CG11030	NGDN	14
FBgn0014343	mirr	IRX6	9		FBgn0031738	CG9171	B4GAT1	7
FBgn0014859	Hr38	NR4A2	13		FBgn0032023	CG14274	None	< 3
FBgn0015229	glec	None	< 3		FBgn0032402	CG14945	PLCXD3	4
FBgn0015400	kek2	None	< 3		FBgn0032402	CG14945	PLCXD1	4
FBgn0015519	nAChRalpha3	CHRNA6	9		FBgn0032402	CG14945	PLCXD2	4
FBgn0015522	olf186-M	ITPRID2	3		FBgn0032629	beat-IIIc	None	< 3
FBgn0015766	Msr-110	None	< 3		FBgn0032666	CG5758	None	< 3
FBgn0015774	NetB	NTN1	11		FBgn0032706	Irk3	KCNJ15	5
FBgn0015776	nrv1	ATP1B1	14		FBgn0032706	Irk3	KCNJ10	5
FBgn0015777	nrv2	ATP1B1	12		FBgn0032901	sky	TBC1D24	14
FBgn0015801	Reg-5	None	< 3		FBgn0033159	Dscam1	DSCAML1	13
FBgn0016031	lama	PLBD2	12		FBgn0033196	CG1358	FLVCR2	13
FBgn0016075	vkg	COL4A1	8		FBgn0033268	Obp44a	None	< 3
FBgn0016123	Alp4	ALPP	7		FBgn0033356	CG8229	None	< 3
FBgn0016797	fz2	FZD5	14		FBgn0033368	CG13743	SLC38A11	15
FBgn0017558	Pdk	PDK3	14		FBgn0033403	CG13739	None	< 3
FBgn0017561	Ork1	KCNK17	6		FBgn0033544	CG7220	UBE2W	15
FBgn0017561	Ork1	KCNK16	6		FBgn0033987	ckn	CASKIN1	4
FBgn0017580	M(1)14E	None	< 3		FBgn0033987	ckn	CASKIN2	4
FBgn0017590	klg	IGLON5	3		FBgn0034128	CG4409	None	< 3
FBgn0017590	klg	NEGR1	3		FBgn0034138	RpS15	RPS15	13
FBgn0017590	klg	OPCML	3		FBgn0034335	GstE1	GSTT2	4
FBgn0017590	klg	LSAMP	3		FBgn0034335	GstE1	GSTT2B	4
FBgn0017590	klg	NTM	3		FBgn0034398	CG15098	None	< 3
FBgn0019643	AANAT1	None	< 3		FBgn0034808	CG9896	None	< 3
FBgn0019650	toy	PAX6	12		FBgn0034897	Sesn	SESN3	13
FBgn0019660	lncRNA:roX2	None	< 3		FBgn0035050	SiaT	ST6GAL1	11
FBgn0019662	qm	GGPS1	14		FBgn0035050	SiaT	ST6GAL2	11
FBgn0019985	mGluR	GRM3	15		FBgn0035173	CG13907	SLC16A14	9
FBgn0020269	mspo	SPON2	11		FBgn0035495	CG14989	None	< 3
FBgn0020307	dve	SATB1	7		FBgn0035756	unc-13-4A	BAIAP3	13
FBgn0020414	Idgf3	CHIT1	4		FBgn0035816	CG13685	None	< 3
FBgn0020414	Idgf3	OVGP1	4		FBgn0036145	CG7607	None	< 3
FBgn0020414	Idgf3	CHI3L1	4		FBgn0036454	CG17839	None	< 3
FBgn0020445	E23	ABCG5	3		FBgn0036619	Cpr72Ec	None	< 3
FBgn0020445	E23	ABCG8	3		FBgn0036725	CG18265	None	< 3
FBgn0020445	E23	ABCG2	3		FBgn0036789	AstC-R2	SSTR2	9
FBgn0020445	E23	ABCG1	3		FBgn0036801	MYPT-75D	PPP1R16A	12
FBgn0020621	Pkn	PKN2	13		FBgn0036801	MYPT-75D	PPP1R16B	12
FBgn0020907	Scp2	None	< 3		FBgn0036821	CG3961	ACSL5	14
FBgn0022355	Tsf1	MELTF	5		FBgn0036935	CG14186	None	< 3
FBgn0022359	Sodh-2	SORD	15		FBgn0037153	olf413	MOXD1	10
FBgn0023179	amon	PCSK2	15		FBgn0037207	Mes2	None	< 3
FBgn0023477	Taldo	TALDO1	14		FBgn0037721	CG9427	IFI30	8
FBgn0023534	CG17778	None	< 3		FBgn0037819	CG14688	PHYHD1	13
FBgn0024150	Ac78C	ADCY8	8		FBgn0037956	CG6959	TPBG	6
FBgn0024189	sns	NPHS1	14		FBgn0037963	Cad87A	None	< 3
FBgn0024293	Spn43Ab	SERPINI1	4		FBgn0038246	CG14853	ERICH2	6
FBgn0024293	Spn43Ab	SERPINB1	4		FBgn0038589	CG18598	None	< 3
FBgn0024315	Picot	SLC17A5	5		FBgn0038641	CG7708	SLC5A7	13
FBgn0024315	Picot	SLC17A4	5		FBgn0038665	euc	SCP2D1	3
FBgn0024321	NK7.1	None	< 3		FBgn0038837	KaiR1D	GRIK2	10
FBgn0024841	Pcd	PCBD1	11		FBgn0039064	CG4467	LNPEP	4
FBgn0024944	Oamb	ADRA1A	3		FBgn0039064	CG4467	ERAP1	4
FBgn0025382	Rab27	RAB27A	14		FBgn0039064	CG4467	ERAP2	4
FBgn0025525	bab2	None	< 3		FBgn0039209	REPTOR	CREBRF	8
FBgn0025682	scf	CALU	14		FBgn0039349	Ssadh	ALDH5A1	15
FBgn0025827	CG6421	None	< 3		FBgn0039420	CG6154	DPEP1	14
FBgn0025879	Timp	TIMP3	13		FBgn0040397	CG3655	None	< 3
FBgn0026160	tna	ZMIZ2	13		FBgn0040532	CG8369	None	< 3
FBgn0026199	myo	MSTN	8		FBgn0040600	CG13631	None	< 3
FBgn0026411	Lim1	LHX1	12		FBgn0040636	CG13255	None	< 3
FBgn0026439	Eaat1	SLC1A3	10		FBgn0040765	luna	KLF7	8
FBgn0026562	SPARC	SPARC	14		FBgn0040765	luna	KLF6	8
FBgn0027073	Ugt49B1	UGT2B4	9		FBgn0040805	CG12355	MPV17L	12
FBgn0027073	Ugt49B1	UGT2A3	9		FBgn0040877	CG12994	None	< 3
FBgn0027073	Ugt49B1	UGT2B11	9		FBgn0041097	robo3	ROBO3	7
FBgn0027073	Ugt49B1	UGT2B10	9		FBgn0041097	robo3	ROBO1	7
FBgn0027108	Inx2	None	< 3		FBgn0041097	robo3	ROBO2	7
FBgn0027339	jim	None	< 3		FBgn0041150	hoe1	OCA2	12
FBgn0027524	CG3909	WDR61	14		FBgn0042696	NfI	NFIA	12
FBgn0027528	goe	KEL	4		FBgn0043783	CG32444	GALM	11
FBgn0027552	CG10863	AKR1B10	7		FBgn0043841	vir-1	None	< 3
FBgn0027589	CG1688	KCNK18	5		FBgn0050115	GEFmeso	PLEKHG2	8
FBgn0027590	GstE12	GSTT2	3		FBgn0050361	mtt	GRM3	4
FBgn0027590	GstE12	GSTT4	3		FBgn0050361	mtt	GRM2	4
FBgn0027590	GstE12	GSTT2B	3		FBgn0050361	mtt	GRM8	4
FBgn0027598	cindr	SH3KBP1	11		FBgn0050361	mtt	GRM1	4
FBgn0027601	pdgy	ACSF2	4		FBgn0050361	mtt	GRM5	4
FBgn0027608	CG2082	NDRG3	7		FBgn0050463	Pgant9	GALNT12	6
FBgn0027608	CG2082	NDRG1	7		FBgn0051092	LpR2	VLDLR	12
FBgn0027654	jdp	DNAJC12	11		FBgn0051163	SKIP	SASH3	6
FBgn0027843	CAH2	CA1	4		FBgn0051163	SKIP	SAMSN1	6
FBgn0027843	CAH2	CA5B	4		FBgn0051191	CG31191	None	< 3
FBgn0027843	CAH2	CA13	4		FBgn0051221	CG31221	None	< 3
FBgn0027843	CAH2	CA3	4		FBgn0051324	CG31324	None	< 3
FBgn0027843	CAH2	CA2	4		FBgn0051345	CG31345	CAPSL	15
FBgn0027843	CAH2	CA7	4		FBgn0051361	dpr17	None	< 3
FBgn0027843	CAH2	CA14	4		FBgn0051619	nolo	ADAMTSL3	10
FBgn0028369	kirre	KIRREL3	11		FBgn0051690	CG31690	TMTC2	12
FBgn0028369	kirre	KIRREL1	11		FBgn0051760	CG31760	GPR179	7
FBgn0028370	kek3	LRRC4C	5		FBgn0051814	DIP-kappa	LSAMP	8
FBgn0028407	Drep3	CIDEA	7		FBgn0051814	DIP-kappa	NTM	8
FBgn0028407	Drep3	CIDEC	7		FBgn0052057	dpr10	None	< 3
FBgn0028481	CG4341	TMTC2	14		FBgn0052066	CG32066	FAM49A	12
FBgn0028482	bdl	IGSF9	6		FBgn0052066	CG32066	FAM49B	12
FBgn0028490	CG31705	None	< 3		FBgn0052204	CG32204	None	< 3
FBgn0028644	beat-Ic	None	< 3		FBgn0052206	CG32206	None	< 3
FBgn0028645	beat-Ib	None	< 3		FBgn0052220	Csas	CMAS	10
FBgn0028704	Nckx30C	SLC24A2	14		FBgn0052512	CG32512	TMEM205	8
FBgn0028875	nAChRalpha5	CHRFAM7A	11		FBgn0052521	CG32521	None	< 3
FBgn0028888	CG4168	None	< 3		FBgn0052580	Muc14A	None	< 3
FBgn0028940	Cyp28a5	CYP3A43	4		FBgn0052626	AMPdeam	AMPD2	13
FBgn0028940	Cyp28a5	CYP3A7-CYP3A51P	4		FBgn0052667	ssp7	None	< 3
FBgn0028940	Cyp28a5	CYP3A4	4		FBgn0052677	X11Lbeta	APBA2	9
FBgn0028940	Cyp28a5	CYP3A5	4		FBgn0052677	X11Lbeta	APBA1	9
FBgn0028940	Cyp28a5	TBXAS1	4		FBgn0052683	CG32683	ARRB2	5
FBgn0029092	ced-6	GULP1	9		FBgn0052683	CG32683	SAG	5
FBgn0029114	Tollo	TLR3	4		FBgn0052982	CG32982	None	< 3
FBgn0029123	SoxN	SOX2	7		FBgn0053087	LRP1	LRP1	11
FBgn0029123	SoxN	SOX1	7		FBgn0053517	Dop2R	DRD2	9
FBgn0029508	Tsp42Ea	CD63	3		FBgn0053527	SIFa	None	< 3
FBgn0029663	CG10804	SLC6A18	7		FBgn0053639	CG33639	None	< 3
FBgn0029768	SPR	None	< 3		FBgn0058469	lncRNA:CR40469	None	< 3
FBgn0029824	CG3726	None	< 3		FBgn0065099	snRNA:7SK	None	< 3
FBgn0029896	CG3168	SV2A	8		FBgn0066084	RpL41	None	< 3
FBgn0029897	RpL17	RPL17-C18orf32	11		FBgn0083228	Frq2	NCS1	14
FBgn0029939	CG9650	BCL11B	12		FBgn0083950	side-VI	None	< 3
FBgn0030158	CG9686	None	< 3		FBgn0083975	Nlg4	NLGN3	9
FBgn0030160	CG9691	None	< 3		FBgn0085380	CG34351	RGS7BP	5
FBgn0030174	CG15312	None	< 3		FBgn0085385	bma	SCYL2	6
FBgn0030234	CG15211	CMTM4	9		FBgn0085390	Dgk	DGKB	13
FBgn0030237	CG15209	None	< 3		FBgn0085395	Shawl	KCNC2	7
FBgn0030258	CG1552	None	< 3		FBgn0085395	Shawl	KCNC3	7
FBgn0030259	CG1545	None	< 3		FBgn0085395	Shawl	KCNC4	7
FBgn0030260	CG1537	None	< 3		FBgn0085395	Shawl	KCNC1	7
FBgn0030272	CG15201	None	< 3		FBgn0085397	Fili	LRRN1	3
FBgn0030317	CG1561	None	< 3		FBgn0085397	Fili	LRRN2	3
FBgn0030362	regucalcin	RGN	15		FBgn0085399	CG34370	None	< 3
FBgn0030482	CG1673	BCAT1	14		FBgn0085413	CG34384	DGKH	14
FBgn0030482	CG1673	BCAT2	14		FBgn0085420	DIP-delta	NTM	7
FBgn0030505	NFAT	NFAT5	7		FBgn0085420	DIP-delta	IGLON5	7
FBgn0030574	sbm	SLC7A9	14		FBgn0085421	Epac	RAPGEF4	14
FBgn0030608	Lsd-2	PLIN2	10		FBgn0085426	Rgk3	RRAD	5
FBgn0030796	CG4829	GGT1	10		FBgn0085447	sif	TIAM1	11
FBgn0030816	CG16700	SLC36A1	10		FBgn0085753	28SrRNA-Psi:CR40596	None	< 3
FBgn0030817	CG4991	SLC36A2	8		FBgn0086348	se	GSTO1	14
FBgn0030817	CG4991	SLC36A1	8		FBgn0086604	side-VIII	None	< 3
FBgn0030817	CG4991	SLC36A4	8		FBgn0086778	nAChRalpha7	CHRFAM7A	12
FBgn0030897	Frq1	NCS1	14		FBgn0087002	apolpp	LOC400499	4
FBgn0030913	CG6123	None	< 3		FBgn0087002	apolpp	APOB	4
FBgn0030941	wgn	None	< 3		FBgn0087012	5-HT2A	HTR2C	10
FBgn0031011	CG8034	SLC16A12	5		FBgn0250867	CG42238	None	< 3
FBgn0031011	CG8034	SLC16A13	5		FBgn0250908	beat-VII	None	< 3
FBgn0031011	CG8034	SLC16A3	5		FBgn0250910	Octbeta3R	HTR4	5
FBgn0031011	CG8034	SLC16A7	5		FBgn0259111	Ndae1	SLC4A10	12
FBgn0031011	CG8034	SLC16A1	5		FBgn0259111	Ndae1	SLC4A8	12
FBgn0031016	kek5	None	< 3		FBgn0259111	Ndae1	SLC4A7	12
FBgn0031294	IA-2	PTPRN	11		FBgn0259170	alpha-Man-Ia	MAN1A2	13
FBgn0031299	CG4629	NIM1K	11		FBgn0259212	cno	AFDN	11
FBgn0031302	CG14340	RGS7BP	4		FBgn0259234	Camta	CAMTA1	12
FBgn0031306	CG4577	None	< 3		FBgn0259241	CG42339	SBSPON	10
FBgn0031374	Wdr62	WDR62	10		FBgn0259244	CG42342	COL13A1	3
FBgn0031374	Wdr62	MAPKBP1	10		FBgn0259677	CG42346	None	< 3
FBgn0031381	Npc2a	NPC2	13		FBgn0259714	DIP-epsilon	OPCML	8
FBgn0031414	eys	EYS	5		FBgn0259714	DIP-epsilon	NTM	8
FBgn0031424	VGlut	SLC17A6	14		FBgn0259714	DIP-epsilon	LSAMP	8
FBgn0031461	daw	TGFB1	4		FBgn0260003	Dys	DMD	11
FBgn0031461	daw	INHBE	4		FBgn0260005	wtrw	None	< 3
FBgn0031461	daw	INHBC	4		FBgn0260429	CG42524	None	< 3
FBgn0031520	CG8837	SLC2A8	4		FBgn0260442	rhea	TLN2	14
FBgn0031520	CG8837	SLC2A6	4		FBgn0260657	CG42540	STOM	12
FBgn0031530	Pgant2	GALNT2	15		FBgn0260753	Pdfr	CALCR	5
FBgn0031689	Cyp28d1	CYP3A43	4		FBgn0260941	app	ZDHHC14	10
FBgn0031689	Cyp28d1	CYP3A7-CYP3A51P	4		FBgn0260943	Rbp6	MSI2	13
FBgn0031689	Cyp28d1	CYP3A4	4		FBgn0260971	CG42594	KCNK18	5
FBgn0031689	Cyp28d1	CYP3A5	4		FBgn0261046	Dscam3	DSCAM	9
FBgn0031689	Cyp28d1	TBXAS1	4		FBgn0261046	Dscam3	DSCAML1	9
FBgn0031736	CG11030	NGDN	14		FBgn0261090	Sytbeta	SYT3	5
FBgn0031738	CG9171	B4GAT1	7		FBgn0261090	Sytbeta	SYT10	5
FBgn0031770	CG13995	None	< 3		FBgn0261090	Sytbeta	SYT9	5
FBgn0031816	Rchy1	RCHY1	11		FBgn0261260	mgl	LRP2	11
FBgn0031850	Tsp	COMP	15		FBgn0261262	CG42613	None	< 3
FBgn0031855	meng	SBK1	11		FBgn0261285	Ppcs	PPCS	13
FBgn0031897	CG13784	SLC66A2	11		FBgn0261549	rdgA	DGKZ	14
FBgn0031969	pes	SCARB1	6		FBgn0261552	ps	NOVA1	12
FBgn0031971	Sirup	SDHAF4	12		FBgn0261555	CG42673	NOS1AP	10
FBgn0031995	CG8475	PHKB	12		FBgn0261649	tinc	None	< 3
FBgn0032022	CG14275	None	< 3		FBgn0261714	Cpn	None	< 3
FBgn0032023	CG14274	None	< 3		FBgn0261953	TfAP-2	TFAP2A	12
FBgn0032048	Dh31	None	< 3		FBgn0261988	Gprk2	GRK5	15
FBgn0032140	CG13117	None	< 3		FBgn0262018	CadN2	None	< 3
FBgn0032151	nAChRalpha6	CHRFAM7A	11		FBgn0262160	CG9932	ZNF462	3
FBgn0032156	CG13124	MIF4GD	7		FBgn0262473	Tl	TLR10	3
FBgn0032213	CG5390	None	< 3		FBgn0262473	Tl	TLR6	3
FBgn0032285	CG17108	None	< 3		FBgn0262473	Tl	TLR2	3
FBgn0032350	CG6287	PHGDH	14		FBgn0262473	Tl	TLR4	3
FBgn0032400	CG6770	NUPR1	8		FBgn0262473	Tl	TLR1	3
FBgn0032629	beat-IIIc	None	< 3		FBgn0262473	Tl	TLR5	3
FBgn0032652	CG6870	CYB5A	7		FBgn0262473	Tl	TLR3	3
FBgn0032666	CG5758	None	< 3		FBgn0262473	Tl	TLR7	3
FBgn0032752	CG10702	INSRR	5		FBgn0262473	Tl	TLR9	3
FBgn0032753	CG17572	None	< 3		FBgn0262614	pyd	TJP2	13
FBgn0032774	CG17549	None	< 3		FBgn0262782	Mdh1	MDH1	14
FBgn0032797	Hasp	SVEP1	5		FBgn0262904	asRNA:CR43259	None	< 3
FBgn0032810	CG13077	CYB561D2	7		FBgn0263220	Hk	KCNAB1	11
FBgn0032810	CG13077	CYB561D1	7		FBgn0263220	Hk	KCNAB2	11
FBgn0032833	COX4	COX4I1	13		FBgn0263257	Cngl	CNGA4	3
FBgn0033033	scaf	None	< 3		FBgn0263257	Cngl	CNGA1	3
FBgn0033065	Cyp6w1	CYP3A4	7		FBgn0263257	Cngl	CNGA3	3
FBgn0033093	CG3270	FOXRED1	13		FBgn0263706	CG43658	ARHGEF10L	10
FBgn0033108	CG15236	None	< 3		FBgn0263706	CG43658	ARHGEF10	10
FBgn0033159	Dscam1	DSCAML1	13		FBgn0263873	sick	NAV2	9
FBgn0033192	Corin	CORIN	5		FBgn0263994	CG43737	None	< 3
FBgn0033268	Obp44a	None	< 3		FBgn0264000	GluRIB	GRIA3	12
FBgn0033356	CG8229	None	< 3		FBgn0264000	GluRIB	GRIA4	12
FBgn0033358	spab	None	< 3		FBgn0264090	CG43759	None	< 3
FBgn0033368	CG13743	SLC38A11	15		FBgn0264308	CG43778	None	< 3
FBgn0033402	Myd88	MYD88	12		FBgn0264339	CG43795	GPR158	7
FBgn0033403	CG13739	None	< 3		FBgn0264490	Eip93F	LCOR	6
FBgn0033405	CG13954	None	< 3		FBgn0264490	Eip93F	LCORL	6
FBgn0033438	Mmp2	MMP15	5		FBgn0264574	Glut1	SLC2A3	10
FBgn0033446	CG1648	None	< 3		FBgn0264574	Glut1	SLC2A1	10
FBgn0033484	CG2269	None	< 3		FBgn0264753	Rgk1	RRAD	7
FBgn0033504	CAP	SORBS3	7		FBgn0264794	lncRNA:CR44024	None	< 3
FBgn0033544	CG7220	UBE2W	15		FBgn0264908	pHCl-1	GLRA4	4
FBgn0033631	Sod3	SOD1	4		FBgn0264975	Nrg	NRCAM	12
FBgn0033730	Cpr49Ag	None	< 3		FBgn0265052	St3	SULT1A4	7
FBgn0033791	Drl-2	RYK	8		FBgn0265052	St3	SULT1A2	7
FBgn0033817	GstE14	None	< 3		FBgn0265052	St3	SULT1B1	7
FBgn0033879	Echs1	ECHS1	15		FBgn0265194	Trpm	TRPM3	15
FBgn0033987	ckn	CASKIN1	4		FBgn0265416	Neto	NETO2	6
FBgn0033987	ckn	CASKIN2	4		FBgn0265595	CG44422	KCNIP4	7
FBgn0034021	CG8180	None	< 3		FBgn0265595	CG44422	KCNIP3	7
FBgn0034128	CG4409	None	< 3		FBgn0265767	zyd	SLC24A3	9
FBgn0034138	RpS15	RPS15	13		FBgn0266349	asRNA:CR44998	None	< 3
FBgn0034286	dpr13	None	< 3		FBgn0266376	lncRNA:CR45018	None	< 3
FBgn0034398	CG15098	None	< 3		FBgn0266377	Pde8	PDE8B	12
FBgn0034405	Jheh2	EPHX1	15		FBgn0266429	AstA-R1	GALR2	11
FBgn0034408	sano	None	< 3		FBgn0267001	Ten-a	TENM3	12
FBgn0034494	CG10444	SLC5A12	12		FBgn0267033	mamo	None	< 3
FBgn0034494	CG10444	SLC5A6	12		FBgn0267181	asRNA:CR45621	None	< 3
FBgn0034512	CG18067	None	< 3		FBgn0267252	Ggamma30A	GNG13	13
FBgn0034638	CG10433	None	< 3		FBgn0267322	lncRNA:CR45758	None	< 3
FBgn0034639	CG15673	None	< 3		FBgn0267431	Myo81F	None	< 3
FBgn0034647	pirk	None	< 3		FBgn0267535	asRNA:CR45875	None	< 3
FBgn0034709	Swim	TINAGL1	14		FBgn0267579	lncRNA:CR45919	None	< 3
FBgn0034716	Oatp58Dc	SLCO1A2	6		FBgn0267668	lncRNA:CR46006	None	< 3
FBgn0034731	CG10384	KHDRBS2	7		FBgn0267910	lncRNA:CR34335	None	< 3
FBgn0034753	CG2852	PPIB	13		FBgn0283451	br	None	< 3
FBgn0034808	CG9896	None	< 3		FBgn0283499	InR	IGF1R	12
FBgn0034885	Eglp4	AQP4	6		FBgn0283651	CG46301	NOL4	8
FBgn0034897	Sesn	SESN3	13		FBgn0285879	disco-r	BNC2	11
FBgn0034909	CG4797	SLC2A8	5		FBgn0285926	Imp	IGF2BP2	13
FBgn0034913	Snap29	SNAP29	14		FBgn0285926	Imp	IGF2BP3	13
FBgn0034997	CG3376	SMPD1	15		FBgn0285926	Imp	IGF2BP1	13
FBgn0035023	ITP	None	< 3		FBgn0286778	CG46385	TENT5C	11
FBgn0035032	ATPsynF	ATP5MF	12
FBgn0035041	CG13594	None	< 3
FBgn0035049	Mmp1	MMP14	9
FBgn0035049	Mmp1	MMP24	9
FBgn0035050	SiaT	ST6GAL1	11
FBgn0035050	SiaT	ST6GAL2	11
FBgn0035173	CG13907	SLC16A14	9
FBgn0035204	CG2277	NT5DC1	13
FBgn0035231	Pcyt2	PCYT1A	14
FBgn0035293	CG5687	SLC5A5	5
FBgn0035293	CG5687	SLC5A8	5
FBgn0035293	CG5687	SLC5A12	5
FBgn0035293	CG5687	SLC5A6	5
FBgn0035346	CG1146	None	< 3
FBgn0035348	CG16758	PNP	14
FBgn0035495	CG14989	None	< 3
FBgn0035656	CG10479	None	< 3
FBgn0035695	CG10226	ABCB4	7
FBgn0035695	CG10226	ABCB5	7
FBgn0035695	CG10226	ABCB11	7
FBgn0035696	Best2	BEST3	7
FBgn0035696	Best2	BEST4	7
FBgn0035696	Best2	BEST1	7
FBgn0035710	SP1173	MFSD6L	3
FBgn0035734	CG14823	None	< 3
FBgn0035756	unc-13-4A	BAIAP3	13
FBgn0035770	pst	None	< 3
FBgn0036043	CG8177	SLC4A2	15
FBgn0036116	CG7888	SLC36A3	8
FBgn0036116	CG7888	SLC36A2	8
FBgn0036116	CG7888	SLC36A1	8
FBgn0036116	CG7888	SLC36A4	8
FBgn0036144	GlcAT-P	B3GAT1	4
FBgn0036145	CG7607	None	< 3
FBgn0036165	chrb	DDIT4L	12
FBgn0036262	CG6910	MIOX	15
FBgn0036381	CG8745	ETNPPL	14
FBgn0036433	CG9628	None	< 3
FBgn0036454	CG17839	None	< 3
FBgn0036479	CG13458	MSS51	4
FBgn0036494	Toll-6	None	< 3
FBgn0036553	CG17027	IMPA1	8
FBgn0036585	CG13071	None	< 3
FBgn0036619	Cpr72Ec	None	< 3
FBgn0036620	CG4842	HPGD	13
FBgn0036725	CG18265	None	< 3
FBgn0036732	Oatp74D	SLCO1A2	6
FBgn0036789	AstC-R2	SSTR2	9
FBgn0036801	MYPT-75D	PPP1R16A	12
FBgn0036801	MYPT-75D	PPP1R16B	12
FBgn0036816	Indy	SLC13A2	13
FBgn0036821	CG3961	ACSL5	14
FBgn0036834	CG6836	SLC51A	6
FBgn0036927	Gabat	ABAT	15
FBgn0037015	cmpy	None	< 3
FBgn0037153	olf413	MOXD1	10
FBgn0037163	laza	PLPP1	8
FBgn0037163	laza	PLPP3	8
FBgn0037207	Mes2	None	< 3
FBgn0037215	beta-Man	MANBA	15
FBgn0037475	Fer1	PTF1A	12
FBgn0037513	pyd3	UPB1	15
FBgn0037521	CG2993	ARRDC4	6
FBgn0037521	CG2993	TXNIP	6
FBgn0037525	CG17816	None	< 3
FBgn0037537	CG2767	AKR1D1	5
FBgn0037537	CG2767	AKR1B1	5
FBgn0037537	CG2767	AKR1A1	5
FBgn0037676	CG8861	None	< 3
FBgn0037819	CG14688	PHYHD1	13
FBgn0037835	CG14687	None	< 3
FBgn0037895	CG6723	SLC5A8	7
FBgn0037895	CG6723	SLC5A12	7
FBgn0037913	fabp	FABP7	11
FBgn0037913	fabp	FABP3	11
FBgn0037913	fabp	PMP2	11
FBgn0037941	CG12594	None	< 3
FBgn0037963	Cad87A	None	< 3
FBgn0038149	GILT1	IFI30	8
FBgn0038246	CG14853	ERICH2	6
FBgn0038256	CG7530	PAQR3	14
FBgn0038279	Sdr	IGF1R	4
FBgn0038321	CG6218	NAGK	14
FBgn0038407	CG6126	SLC22A16	7
FBgn0038420	CG10311	None	< 3
FBgn0038460	CG18622	None	< 3
FBgn0038494	beat-IIb	None	< 3
FBgn0038498	beat-IIa	None	< 3
FBgn0038542	TyrR	None	< 3
FBgn0038589	CG18598	None	< 3
FBgn0038641	CG7708	SLC5A7	13
FBgn0038665	euc	SCP2D1	3
FBgn0038679	CG6040	None	< 3
FBgn0038720	CG6231	SLC22A7	5
FBgn0038752	CG4462	SLC22A14	5
FBgn0038752	CG4462	SLC22A1	5
FBgn0038752	CG4462	SLC22A13	5
FBgn0038799	MFS9	SLC17A5	7
FBgn0038818	Nep4	MMEL1	8
FBgn0038837	KaiR1D	GRIK2	10
FBgn0038930	CG5778	None	< 3
FBgn0038946	rdhB	DHRS11	7
FBgn0038980	Octbeta1R	HTR4	7
FBgn0039089	beat-IV	None	< 3
FBgn0039209	REPTOR	CREBRF	8
FBgn0039266	CG11791	None	< 3
FBgn0039321	CG10550	None	< 3
FBgn0039349	Ssadh	ALDH5A1	15
FBgn0039380	CG5890	KCNIP1	13
FBgn0039420	CG6154	DPEP1	14
FBgn0039617	DIP-gamma	IGLON5	8
FBgn0039617	DIP-gamma	OPCML	8
FBgn0039697	CG7834	ETFB	13
FBgn0039723	CG15522	None	< 3
FBgn0039756	CG9743	SCD5	7
FBgn0039756	CG9743	SCD	7
FBgn0039774	CDase	ASAH2B	9
FBgn0039774	CDase	ASAH2	9
FBgn0040153	l(1)G0469	None	< 3
FBgn0040256	Ugt35C1	UGT2B15	8
FBgn0040256	Ugt35C1	UGT2B28	8
FBgn0040256	Ugt35C1	UGT2B17	8
FBgn0040364	CG11378	None	< 3
FBgn0040397	CG3655	None	< 3
FBgn0040532	CG8369	None	< 3
FBgn0040609	CG3348	None	< 3
FBgn0040636	CG13255	None	< 3
FBgn0040726	dpr1	None	< 3
FBgn0040736	IM3	None	< 3
FBgn0040765	luna	KLF7	8
FBgn0040765	luna	KLF6	8
FBgn0040805	CG12355	MPV17L	12
FBgn0040823	dpr6	None	< 3
FBgn0040850	CG15210	None	< 3
FBgn0040877	CG12994	None	< 3
FBgn0041094	scyl	DDIT4	11
FBgn0041094	scyl	DDIT4L	11
FBgn0041150	hoe1	OCA2	12
FBgn0041605	cpx	CPLX1	9
FBgn0041629	Hexo2	HEXA	7
FBgn0041629	Hexo2	HEXB	7
FBgn0042201	Nplp3	None	< 3
FBgn0042696	NfI	NFIA	12
FBgn0043364	cbt	KLF11	6
FBgn0043783	CG32444	GALM	11
FBgn0043841	vir-1	None	< 3
FBgn0044328	CG32052	SMPDL3B	15
FBgn0045038	Proc	None	< 3
FBgn0046763	CG17278	None	< 3
FBgn0050035	Tret1-1	SLC2A8	11
FBgn0050069	CG30069	None	< 3
FBgn0050115	GEFmeso	PLEKHG2	8
FBgn0050197	CG30197	None	< 3
FBgn0050285	CG30285	None	< 3
FBgn0050359	Mal-A5	SLC3A1	10
FBgn0050361	mtt	GRM3	4
FBgn0050361	mtt	GRM2	4
FBgn0050361	mtt	GRM8	4
FBgn0050361	mtt	GRM1	4
FBgn0050361	mtt	GRM5	4
FBgn0050419	CG30419	None	< 3
FBgn0050463	Pgant9	GALNT12	6
FBgn0051092	LpR2	VLDLR	12
FBgn0051163	SKIP	SASH3	6
FBgn0051163	SKIP	SAMSN1	6
FBgn0051191	CG31191	None	< 3
FBgn0051200	CG31200	None	< 3
FBgn0051221	CG31221	None	< 3
FBgn0051324	CG31324	None	< 3
FBgn0051345	CG31345	CAPSL	15
FBgn0051361	dpr17	None	< 3
FBgn0051475	CG31475	SDF4	14
FBgn0051481	pb	HOXB2	8
FBgn0051481	pb	HOXA2	8
FBgn0051547	NKCC	SLC12A3	10
FBgn0051619	nolo	ADAMTSL3	10
FBgn0051646	DIP-theta	OPCML	8
FBgn0051646	DIP-theta	NTM	8
FBgn0051663	CG31663	MFSD6	3
FBgn0051690	CG31690	TMTC2	12
FBgn0051706	CG31706	None	< 3
FBgn0051708	DIP-zeta	NTM	8
FBgn0051708	DIP-zeta	IGLON5	8
FBgn0051708	DIP-zeta	NEGR1	8
FBgn0051760	CG31760	GPR179	7
FBgn0051774	fred	None	< 3
FBgn0051814	DIP-kappa	LSAMP	8
FBgn0051814	DIP-kappa	NTM	8
FBgn0051974	CG31974	None	< 3
FBgn0052017	CG32017	None	< 3
FBgn0052057	dpr10	None	< 3
FBgn0052066	CG32066	FAM49A	12
FBgn0052066	CG32066	FAM49B	12
FBgn0052082	IRSp53	BAIAP2	10
FBgn0052183	Ccn	CCN2	10
FBgn0052204	CG32204	None	< 3
FBgn0052206	CG32206	None	< 3
FBgn0052220	Csas	CMAS	10
FBgn0052406	PVRAP	None	< 3
FBgn0052521	CG32521	None	< 3
FBgn0052580	Muc14A	None	< 3
FBgn0052600	dpr8	None	< 3
FBgn0052626	AMPdeam	AMPD2	13
FBgn0052647	CG32647	DGCR2	6
FBgn0052667	ssp7	None	< 3
FBgn0052677	X11Lbeta	APBA2	9
FBgn0052677	X11Lbeta	APBA1	9
FBgn0052683	CG32683	ARRB2	5
FBgn0052683	CG32683	SAG	5
FBgn0052698	CARPB	CA10	13
FBgn0052982	CG32982	None	< 3
FBgn0053087	LRP1	LRP1	11
FBgn0053143	CG33143	None	< 3
FBgn0053179	beat-IIIb	None	< 3
FBgn0053517	Dop2R	DRD2	9
FBgn0053543	CG33543	NCAM2	3
FBgn0053543	CG33543	NCAM1	3
FBgn0053543	CG33543	IGLON5	3
FBgn0053543	CG33543	OPCML	3
FBgn0053543	CG33543	LSAMP	3
FBgn0053543	CG33543	NTM	3
FBgn0053639	CG33639	None	< 3
FBgn0053696	CNMaR	None	< 3
FBgn0058469	lncRNA:CR40469	None	< 3
FBgn0065099	snRNA:7SK	None	< 3
FBgn0066084	RpL41	None	< 3
FBgn0066101	LpR1	VLDLR	11
FBgn0069973	CG40485	DHRS11	15
FBgn0083228	Frq2	NCS1	14
FBgn0083972	CG34136	None	< 3
FBgn0085370	Pde11	PDE5A	11
FBgn0085380	CG34351	RGS7BP	5
FBgn0085382	CG34353	LSAMP	3
FBgn0085383	CG34354	TIA1	7
FBgn0085383	CG34354	TIAL1	7
FBgn0085384	CG34355	None	< 3
FBgn0085385	bma	SCYL2	6
FBgn0085390	Dgk	DGKB	13
FBgn0085395	Shawl	KCNC2	7
FBgn0085395	Shawl	KCNC3	7
FBgn0085395	Shawl	KCNC4	7
FBgn0085395	Shawl	KCNC1	7
FBgn0085397	Fili	LRRN1	3
FBgn0085397	Fili	LRRN2	3
FBgn0085399	CG34370	None	< 3
FBgn0085400	side-V	None	< 3
FBgn0085407	Pvf3	None	< 3
FBgn0085409	smal	DDR2	10
FBgn0085412	CG34383	PLEKHA6	5
FBgn0085412	CG34383	PLEKHA5	5
FBgn0085413	CG34384	DGKH	14
FBgn0085414	dpr12	None	< 3
FBgn0085420	DIP-delta	NTM	7
FBgn0085420	DIP-delta	IGLON5	7
FBgn0085426	Rgk3	RRAD	5
FBgn0085427	CG34398	None	< 3
FBgn0085434	NaCP60E	SCN8A	4
FBgn0085434	NaCP60E	SCN11A	4
FBgn0085443	spri	RIN2	10
FBgn0085446	CG34417	SMTNL1	5
FBgn0085447	sif	TIAM1	11
FBgn0086348	se	GSTO1	14
FBgn0086359	Invadolysin	LMLN	15
FBgn0086408	stl	None	< 3
FBgn0086604	side-VIII	None	< 3
FBgn0086677	jeb	None	< 3
FBgn0086680	vvl	POU3F2	11
FBgn0086680	vvl	POU3F4	11
FBgn0086680	vvl	POU3F3	11
FBgn0086778	nAChRalpha7	CHRFAM7A	12
FBgn0087002	apolpp	LOC400499	4
FBgn0087002	apolpp	APOB	4
FBgn0087012	5-HT2A	HTR2C	10
FBgn0243512	puc	DUSP10	8
FBgn0250757	CG42235	SLC5A5	6
FBgn0250757	CG42235	SLC5A8	6
FBgn0250757	CG42235	SLC5A12	6
FBgn0250839	CG2016	None	< 3
FBgn0250867	CG42238	None	< 3
FBgn0250869	CG42240	None	< 3
FBgn0250908	beat-VII	None	< 3
FBgn0250910	Octbeta3R	HTR4	5
FBgn0259108	futsch	MAP1B	8
FBgn0259108	futsch	MAP1A	8
FBgn0259111	Ndae1	SLC4A10	12
FBgn0259111	Ndae1	SLC4A8	12
FBgn0259111	Ndae1	SLC4A7	12
FBgn0259170	alpha-Man-Ia	MAN1A2	13
FBgn0259171	Pde9	PDE9A	6
FBgn0259175	ome	FAP	10
FBgn0259212	cno	AFDN	11
FBgn0259213	side-II	None	< 3
FBgn0259216	RhoGAP102A	ARHGAP6	6
FBgn0259227	CG42327	PTPN5	3
FBgn0259227	CG42327	PTPRR	3
FBgn0259227	CG42327	PTPN7	3
FBgn0259242	CG42340	KCNK18	5
FBgn0259243	Pka-R1	PRKAR1A	14
FBgn0259243	Pka-R1	PRKAR1B	14
FBgn0259244	CG42342	COL13A1	3
FBgn0259245	DIP-beta	IGLON5	8
FBgn0259677	CG42346	None	< 3
FBgn0259714	DIP-epsilon	OPCML	8
FBgn0259714	DIP-epsilon	NTM	8
FBgn0259714	DIP-epsilon	LSAMP	8
FBgn0259789	zld	None	< 3
FBgn0259821	CG42402	EVA1C	8
FBgn0259935	CG42458	HNRNPC	6
FBgn0260003	Dys	DMD	11
FBgn0260429	CG42524	None	< 3
FBgn0260442	rhea	TLN2	14
FBgn0260462	CG12163	CTSF	11
FBgn0260632	dl	RELA	9
FBgn0260632	dl	REL	9
FBgn0260657	CG42540	STOM	12
FBgn0260658	CG42541	RRAD	3
FBgn0260660	Mp	COL15A1	8
FBgn0260753	Pdfr	CALCR	5
FBgn0260793	2mit	None	< 3
FBgn0260941	app	ZDHHC14	10
FBgn0260943	Rbp6	MSI2	13
FBgn0260964	Vmat	SLC18A2	14
FBgn0260971	CG42594	KCNK18	5
FBgn0261046	Dscam3	DSCAM	9
FBgn0261046	Dscam3	DSCAML1	9
FBgn0261090	Sytbeta	SYT3	5
FBgn0261090	Sytbeta	SYT10	5
FBgn0261090	Sytbeta	SYT9	5
FBgn0261113	Xrp1	None	< 3
FBgn0261258	rgn	REG1A	3
FBgn0261260	mgl	LRP2	11
FBgn0261285	Ppcs	PPCS	13
FBgn0261461	RhoGAP18B	None	< 3
FBgn0261509	haf	None	< 3
FBgn0261549	rdgA	DGKZ	14
FBgn0261552	ps	NOVA1	12
FBgn0261556	CG42674	PLEKHG5	6
FBgn0261560	Thor	EIF4EBP2	13
FBgn0261565	Lmpt	FHL2	3
FBgn0261588	pdm3	POU6F1	6
FBgn0261597	RpS26	RPS26	14
FBgn0261648	salm	SALL3	12
FBgn0261648	salm	SALL1	12
FBgn0261649	tinc	None	< 3
FBgn0261698	SLO2	KCNT1	14
FBgn0261836	Msp300	SYNE1	5
FBgn0261871	dpr2	None	< 3
FBgn0261928	CG42795	TBC1D30	6
FBgn0261988	Gprk2	GRK5	15
FBgn0261999	Ca-Ma2d	CACNA2D3	9
FBgn0261999	Ca-Ma2d	CACNA2D4	9
FBgn0262160	CG9932	ZNF462	3
FBgn0262473	Tl	TLR10	3
FBgn0262473	Tl	TLR6	3
FBgn0262473	Tl	TLR2	3
FBgn0262473	Tl	TLR4	3
FBgn0262473	Tl	TLR1	3
FBgn0262473	Tl	TLR5	3
FBgn0262508	CG43078	None	< 3
FBgn0262509	nrm	None	< 3
FBgn0262579	Ect4	SARM1	10
FBgn0262593	Shab	KCNB2	8
FBgn0262593	Shab	KCNB1	8
FBgn0262614	pyd	TJP2	13
FBgn0262636	dati	None	< 3
FBgn0262738	norpA	PLCB4	14
FBgn0262782	Mdh1	MDH1	14
FBgn0263005	CG43313	CHPF	14
FBgn0263049	lncRNA:let7C	None	< 3
FBgn0263131	CG43373	ADCY5	11
FBgn0263219	Dscam4	DSCAM	13
FBgn0263220	Hk	KCNAB1	11
FBgn0263220	Hk	KCNAB2	11
FBgn0263236	SP1029	ANPEP	8
FBgn0263289	scrib	SCRIB	7
FBgn0263397	Ih	HCN3	9
FBgn0263598	Vha68-2	ATP6V1A	13
FBgn0263706	CG43658	ARHGEF10L	10
FBgn0263706	CG43658	ARHGEF10	10
FBgn0263772	CG43689	MYT1L	7
FBgn0263772	CG43689	ST18	7
FBgn0263772	CG43689	MYT1	7
FBgn0263773	fok	None	< 3
FBgn0263930	dally	GPC5	14
FBgn0263980	Stacl	STAC3	5
FBgn0263994	CG43737	None	< 3
FBgn0263995	cpo	RBPMS	9
FBgn0264000	GluRIB	GRIA3	12
FBgn0264000	GluRIB	GRIA4	12
FBgn0264087	Slob	PXK	4
FBgn0264090	CG43759	None	< 3
FBgn0264273	Sema2b	SEMA3D	7
FBgn0264273	Sema2b	SEMA3A	7
FBgn0264273	Sema2b	SEMA4D	7
FBgn0264308	CG43778	None	< 3
FBgn0264339	CG43795	GPR158	7
FBgn0264442	ab	None	< 3
FBgn0264462	lncRNA:CR43870	None	< 3
FBgn0264490	Eip93F	LCOR	6
FBgn0264490	Eip93F	LCORL	6
FBgn0264491	how	QKI	12
FBgn0264503	CG43902	None	< 3
FBgn0264574	Glut1	SLC2A3	10
FBgn0264574	Glut1	SLC2A1	10
FBgn0264753	Rgk1	RRAD	7
FBgn0264794	lncRNA:CR44024	None	< 3
FBgn0264895	RapGAP1	RAP1GAP	12
FBgn0264908	pHCl-1	GLRA4	4
FBgn0264975	Nrg	NRCAM	12
FBgn0265048	cv-d	None	< 3
FBgn0265182	CG44247	None	< 3
FBgn0265274	Inx3	None	< 3
FBgn0265416	Neto	NETO2	6
FBgn0265595	CG44422	KCNIP4	7
FBgn0265595	CG44422	KCNIP3	7
FBgn0265598	Bx	LMO1	8
FBgn0265767	zyd	SLC24A3	9
FBgn0265959	rdgC	PPEF2	12
FBgn0265959	rdgC	PPEF1	12
FBgn0266100	CG44837	DPEP3	9
FBgn0266429	AstA-R1	GALR2	11
FBgn0266756	btsz	SYTL4	10
FBgn0266801	CG45263	None	< 3
FBgn0266851	lncRNA:CR45312	None	< 3
FBgn0267001	Ten-a	TENM3	12
FBgn0267033	mamo	None	< 3
FBgn0267181	asRNA:CR45621	None	< 3
FBgn0267253	CG32700	None	< 3
FBgn0267322	lncRNA:CR45758	None	< 3
FBgn0267336	Glut4EF	ZNF704	10
FBgn0267431	Myo81F	None	< 3
FBgn0267519	28SrRNA-Psi:CR45859	None	< 3
FBgn0267579	lncRNA:CR45919	None	< 3
FBgn0267668	lncRNA:CR46006	None	< 3
FBgn0267910	lncRNA:CR34335	None	< 3
FBgn0270926	AsnS	ASNS	11
FBgn0270928	VAChT	SLC18A3	14
FBgn0270928	VAChT	SLC18A3	14
FBgn0283451	br	None	< 3
FBgn0283499	InR	IGF1R	12
FBgn0283651	CG46301	NOL4	8
FBgn0284243	betaTub56D	TUBB4B	12
FBgn0284245	eEF1alpha1	EEF1A2	11
FBgn0284408	trol	HSPG2	11
FBgn0285926	Imp	IGF2BP2	13
FBgn0285926	Imp	IGF2BP3	13
FBgn0285926	Imp	IGF2BP1	13
FBgn0285952	eEF5	EIF5A	14
FBgn0285955	cv-c	DLC1	9
FBgn0285963	CG46339	LNPEP	4
FBgn0285963	CG46339	ERAP1	4
FBgn0285963	CG46339	ERAP2	4
FBgn0286778	CG46385	TENT5C	11
FBgn0286827	lncRNA:CR43334	None	< 3
