# Supplementary material for: The Drosophila brain on cocaine at single-cell resolution
Source: Genome Res. 2021 Oct;31(10):1927–37. doi: 10.1101/gr.268037.120 (PMC8494231; doi:10.1101/gr.268037.120)
Supplement: Supplemental Material [file supp_gr.268037.120_Supplemental_Table_S5_xlsx.xlsx]

## Sheet: Brain_Cocaine_global
Globally Up-Regulated Differentially Expressed Genes					Globally Down-Regulated Differentially Expressed Genes
Rank	FlyBaseID	Gene symbol	MC3 score		Rank	FlyBaseID	Gene Symbol	MC3 score
1	FBgn0267910	lncRNA:CR34335	0.0455799		1	FBgn0019660	lncRNA:roX2	0.0386841
2	FBgn0013686	mt:lrRNA	0.0386614		2	FBgn0032833	COX4	0.0240443
3	FBgn0066084	RpL41	0.0322638		3	FBgn0002940	ninaE	0.022525
4	FBgn0260943	Rbp6	0.0279303		4	FBgn0010411	RpS18	0.0202018
5	FBgn0031294	IA-2	0.0278788		5	FBgn0000121	Arr2	0.0175812
6	FBgn0004595	pros	0.0256941		6	FBgn0261597	RpS26	0.0160558
7	FBgn0027339	jim	0.0212884		7	FBgn0260658	CG42541	0.0131768
8	FBgn0051221	CG31221	0.0209138		8	FBgn0035032	ATPsynF	0.0121454
9	FBgn0001234	lncRNA:Hsromega	0.0208173		9	FBgn0002593	RpLP1	0.0118498
10	FBgn0065099	snRNA:7SK	0.0196583		10	FBgn0014859	Hr38	0.0115758
11	FBgn0003380	Sh	0.0194657		11	FBgn0001225	Hsp26	0.0114995
12	FBgn0267001	Ten-a	0.0179798		12	FBgn0000064	Ald1	0.0105698
13	FBgn0004580	Cbp53E	0.0155953		13	FBgn0011693	Pdh	0.0102752
14	FBgn0285944	para	0.0154531		14	FBgn0034725	CG6044	0.0100991
15	FBgn0032151	nAChRalpha6	0.0139917		15	FBgn0001226	Hsp27	0.0095192
16	FBgn0263397	Ih	0.0137431		16	FBgn0029897	RpL17	0.00935117
17	FBgn0004198	ct	0.0137338		17	FBgn0034753	CG2852	0.00853552
18	FBgn0263257	Cngl	0.0126787		18	FBgn0033438	Mmp2	0.00771942
19	FBgn0085447	sif	0.012605		19	FBgn0032797	Hasp	0.00766605
20	FBgn0001186	Hex-A	0.0123333		20	FBgn0001091	Gapdh1	0.00750685
21	FBgn0259108	futsch	0.01159		21	FBgn0264339	CG43795	0.00745467
22	FBgn0267252	Ggamma30A	0.010896		22	FBgn0013954	Fkbp12	0.00745119
23	FBgn0052062	Rbfox1	0.0107059		23	FBgn0034138	RpS15	0.00733147
24	FBgn0000108	Appl	0.00952635		24	FBgn0037874	Tctp	0.00722141
25	FBgn0267336	Glut4EF	0.0093704		25	FBgn0263980	Stacl	0.00693653
26	FBgn0053517	Dop2R	0.00919707		26	FBgn0001224	Hsp23	0.00678935
27	FBgn0267033	mamo	0.00915107		27	FBgn0027654	jdp	0.0064206
28	FBgn0030897	Frq1	0.00903477		28	FBgn0000422	Ddc	0.00626599
29	FBgn0041605	cpx	0.0080114		29	FBgn0037913	fabp	0.00626315
30	FBgn0011666	msi	0.00743296		30	FBgn0031381	Npc2a	0.00625518
31	FBgn0003165	pum	0.00720526		31	FBgn0261999	Ca-Ma2d	0.00625198
32	FBgn0003435	sm	0.00710808		32	FBgn0041707	7B2	0.00625164
33	FBgn0262737	mub	0.00704931		33	FBgn0262508	CG43078	0.00623
34	FBgn0031424	VGlut	0.00695609		34	FBgn0003360	sesB	0.00618477
35	FBgn0011224	heph	0.00671023		35	FBgn0266801	CG45263	0.00615025
36	FBgn0004244	Rdl	0.00669312		36	FBgn0025382	Rab27	0.00611192
37	FBgn0004242	Syt1	0.00654817		37	FBgn0033356	CG8229	0.00609357
38	FBgn0261836	Msp300	0.00648132		38	FBgn0035495	CG14989	0.00580497
39	FBgn0264386	Ca-alpha1T	0.00636731		39	FBgn0034136	DAT	0.00578207
40	FBgn0261552	ps	0.00622423		40	FBgn0033268	Obp44a	0.00577846
41	FBgn0035495	CG14989	0.00591817		41	FBgn0032048	Dh31	0.00577
42	FBgn0085391	trv	0.00580961		42	FBgn0250839	CG2016	0.00571917
43	FBgn0005775	Con	0.00575455		43	FBgn0266750	lncRNA:CR45223	0.00571047
44	FBgn0085432	pan	0.00572383
45	FBgn0033403	CG13739	0.00554973
46	FBgn0002868	MtnA	0.00541289
47	FBgn0014163	fax	0.00527866
48	FBgn0264001	bru3	0.00521457
49	FBgn0265487	mbl	0.00520462
50	FBgn0003429	slo	0.00508478
51	FBgn0003091	Pkc53E	0.00468344
52	FBgn0265296	Dscam2	0.00460859
53	FBgn0261262	CG42613	0.00453553
54	FBgn0285926	Imp	0.00452639
55	FBgn0000273	Pka-C1	0.00451114
56	FBgn0264006	dysc	0.00449675
57	FBgn0004516	Gad1	0.00436189
58	FBgn0014184	Oda	0.00434347
59	FBgn0260657	CG42540	0.00429816
60	FBgn0085387	shakB	0.00429511
61	FBgn0086677	jeb	0.00428435
62	FBgn0032400	CG6770	0.0042663
63	FBgn0028644	beat-Ic	0.00425203
64	FBgn0003360	sesB	0.0042363
65	FBgn0264490	Eip93F	0.00420515
66	FBgn0261788	Ank2	0.00417098
67	FBgn0013576	mtd	0.00413104
68	FBgn0000633	CG17716	0.00412775
69	FBgn0052264	CG32264	0.00409469
70	FBgn0001235	hth	0.0040863
71	FBgn0029663	CG10804	0.00407421
72	FBgn0053527	SIFa	0.00400615

## Sheet: Names
# submitted_id	current_id	converted_id	current_symbol
CG4190	FBgn0001229	FBgn0001229	Hsp67Bc
CG2986	FBgn0015521	FBgn0015521	RpS21
CG18628	FBgn0036091	FBgn0036091	CG18628
CR44701	FBgn0265912	FBgn0265912	lncRNA:CR44701
CG11880	FBgn0039637	FBgn0039637	Ctl2
CG33696	FBgn0053696	FBgn0053696	CNMaR
CG13870	FBgn0034506	FBgn0034506	CG13870
CG2682	FBgn0033015	FBgn0033015	d4
CG3622	FBgn0086408	FBgn0086408	stl
CR44330	FBgn0265418	FBgn0265418	lncRNA:CR44330
CG5216	FBgn0024291	FBgn0024291	Sirt1
CG13338	FBgn0033867	FBgn0033867	Cpr50Ca
CG13220	FBgn0033608	FBgn0033608	CG13220
CG1584	FBgn0023180	FBgn0023180	Orc6
CG12276	FBgn0029512	FBgn0029512	Aos1
CG15111	FBgn0034419	FBgn0034419	CG15111
CG6187	FBgn0032256	FBgn0032256	RluA-2
CG8776	FBgn0261673	FBgn0261673	nemy
CG18803	FBgn0284421	FBgn0284421	Psn
CG2258	FBgn0029997	FBgn0029997	CG2258
CG4930	FBgn0028515	FBgn0028515	EndoGI
CG8183	FBgn0019968	FBgn0019968	Khc-73
CG4832	FBgn0013765	FBgn0013765	cnn
CG2201	FBgn0032955	FBgn0032955	CG2201
CG17927	FBgn0264695	FBgn0264695	Mhc
CG18076	FBgn0013733	FBgn0013733	shot
CG42668	FBgn0261550	FBgn0261550	CG42668
CG2368	FBgn0263102	FBgn0263102	psq
CG3572	FBgn0022960	FBgn0022960	vimar
CG4061	FBgn0025630	FBgn0025630	Rtca
CG43365	FBgn0263108	FBgn0263108	BtbVII
CG34449	FBgn0085478	FBgn0085478	Zdhhc8
CG8474	FBgn0025874	FBgn0025874	Meics
CG4937	FBgn0030808	FBgn0030808	RhoGAP15B
CG6303	FBgn0266717	FBgn0266717	Bruce
CG16857	FBgn0028482	FBgn0028482	bdl
CR45264	FBgn0266802	FBgn0266802	asRNA:CR45264
CG11314	FBgn0039800	FBgn0039800	Npc2g
CG15141	FBgn0032635	FBgn0032635	CG15141
CG45477	FBgn0267033	FBgn0267033	mamo
CG4347	FBgn0035978	FBgn0035978	UGP
CG13197	FBgn0062449	FBgn0062449	CG13197
CG7105	FBgn0045038	FBgn0045038	Proc
CG9022	FBgn0014868	FBgn0014868	Ost48
CG6496	FBgn0023178	FBgn0023178	Pdf
CG44004	FBgn0264746	FBgn0264746	CG44004
CG32267	FBgn0052267	FBgn0052267	CG32267
CG3629	FBgn0000157	FBgn0000157	Dll
CG7052	FBgn0041182	FBgn0041182	Tep2
CG6361	FBgn0030925	FBgn0030925	Hayan
CG33115	FBgn0028542	FBgn0028542	NimB4
CG17168	FBgn0039943	FBgn0039943	CG17168
CG7446	FBgn0001134	FBgn0001134	Grd
CG14233	FBgn0040089	FBgn0040089	meso18E
CG3700	FBgn0034796	FBgn0034796	CG3700
CG33550	FBgn0261292	FBgn0261292	CheB53a
CG31005	FBgn0051005	FBgn0051005	qless
CG13758	FBgn0260753	FBgn0260753	Pdfr
CG3353	FBgn0038869	FBgn0038869	Smyd5
CG9453	FBgn0265137	FBgn0265137	Spn42Da
CG4140	FBgn0261881	FBgn0261881	l(2)35Be
CG8236	FBgn0037626	FBgn0037626	CG8236
CG6353	FBgn0038893	FBgn0038893	Archease
CG10874	FBgn0031395	FBgn0031395	CG10874
CG7564	FBgn0036734	FBgn0036734	CG7564
CG10704	FBgn0036285	FBgn0036285	toe
CG1129	FBgn0037279	FBgn0037279	CG1129
CG8567	FBgn0013799	FBgn0013799	Deaf1
CG34107	FBgn0083943	FBgn0083943	CG34107
CG32442	FBgn0052442	FBgn0052442	Arv1
CR44092	FBgn0264901	FBgn0264901	lncRNA:CR44092
CG1140	FBgn0035298	FBgn0035298	SCOT
CR44218	FBgn0265149	FBgn0265149	lncRNA:CR44218
CG10069	FBgn0034611	FBgn0034611	MFS16
CG10376	FBgn0032702	FBgn0032702	CG10376
CG5605	FBgn0036974	FBgn0036974	eRF1
CG7958	FBgn0026160	FBgn0026160	tna
CG33270	FBgn0053270	FBgn0053270	CG33270
CG30145	FBgn0050145	FBgn0050145	Obp57e
CG4713	FBgn0261983	FBgn0261983	l(2)gd1
CG8436	FBgn0037670	FBgn0037670	Ibf1
CR44901	FBgn0266206	FBgn0266206	lncRNA:CR44901
CG13897	FBgn0035160	FBgn0035160	hng3
CG8290	FBgn0026573	FBgn0026573	ADD1
CR45928	FBgn0267590	FBgn0267590	asRNA:CR45928
CG9078	FBgn0001941	FBgn0001941	ifc
CR33940	FBgn0062928	FBgn0062928	hpRNA:CR33940
CG18174	FBgn0028694	FBgn0028694	Rpn11
CG3004	FBgn0264691	FBgn0264691	Lst8
CG4472	FBgn0020416	FBgn0020416	Idgf1
CG7611	FBgn0037094	FBgn0037094	CG7611
CG43663	FBgn0263738	FBgn0263738	Ada2a
CG5482	FBgn0034368	FBgn0034368	zda
CG34410	FBgn0086913	FBgn0086913	Rab26
CG10483	FBgn0035649	FBgn0035649	CG10483
CG8210	FBgn0262512	FBgn0262512	Vha14-1
CG42492	FBgn0259994	FBgn0259994	OtopLa
CR46084	FBgn0267753	FBgn0267753	lncRNA:CR46084
CR45340	FBgn0266879	FBgn0266879	lncRNA:CR45340
CG43092	FBgn0262538	FBgn0262538	CG43092
CG31108	FBgn0051108	FBgn0051108	TTLL5
CG31108	FBgn0189768	FBgn0189768	Dsim\GD18234
CG12449	FBgn0287209	FBgn0287209	Gfat1
CG8445	FBgn0262166	FBgn0262166	calypso
CG1057	FBgn0037262	FBgn0037262	MED31
CG1448	FBgn0265274	FBgn0265274	Inx3
CG10215	FBgn0028434	FBgn0028434	Ercc1
CG34288	FBgn0085317	FBgn0085317	CG34288
CG10072	FBgn0261445	FBgn0261445	sgl
CG10007	FBgn0260744	FBgn0260744	Tango9
CR44526	FBgn0265719	FBgn0265719	lncRNA:CR44526
CG4241	FBgn0067783	FBgn0067783	DPCoAC
CG6752	FBgn0038296	FBgn0038296	CG6752
CG3040	FBgn0029925	FBgn0029925	CG3040
CG8886	FBgn0010607	FBgn0010607	l(2)05714
CG18241	FBgn0032095	FBgn0032095	Toll-4
CG1911	FBgn0039680	FBgn0039680	Cap-D2
CR43609	FBgn0263584	FBgn0263584	asRNA:CR43609
CG30085	FBgn0050085	FBgn0050085	Rif1
CG5384	FBgn0032216	FBgn0032216	Usp14
CG9885	FBgn0000490	FBgn0000490	dpp
CG16807	FBgn0036621	FBgn0036621	roq
CR32553	FBgn0052553	FBgn0052553	lncRNA:CR32553
CG34112	FBgn0086608	FBgn0086608	CG34112
CG9395	FBgn0032506	FBgn0032506	CG9395
CG1859	FBgn0044011	FBgn0044011	Spn43Ad
CG33340	FBgn0053340	FBgn0053340	CG33340
CG1607	FBgn0039844	FBgn0039844	CG1607
CG11207	FBgn0030241	FBgn0030241	feo
CG5903	FBgn0038400	FBgn0038400	CG5903
CG14920	FBgn0032337	FBgn0032337	AstCC
CG13732	FBgn0036730	FBgn0036730	qjt
CG13732	FBgn0085943	FBgn0085943	Dsim\qjt
CG17778	FBgn0023534	FBgn0023534	CG17778
CG16988	FBgn0040291	FBgn0040291	Roc1b
CG17035	FBgn0036545	FBgn0036545	GXIVsPLA2
CG9092	FBgn0001089	FBgn0001089	Gal
CG16995	FBgn0031412	FBgn0031412	CG16995
CG4289	FBgn0037020	FBgn0037020	Pex14
CG3850	FBgn0033782	FBgn0033782	sug
CG1492	FBgn0030361	FBgn0030361	CG1492
CG5541	FBgn0030603	FBgn0030603	CG5541
CG7925	FBgn0003714	FBgn0003714	tko
CG11790	FBgn0039265	FBgn0039265	CG11790
CG7029	FBgn0039026	FBgn0039026	CG7029
CG8505	FBgn0033728	FBgn0033728	Cpr49Ae
CG32161	FBgn0052161	FBgn0052161	CG32161
CG3186	FBgn0285952	FBgn0285952	eEF5
CG15085	FBgn0023214	FBgn0023214	edl
CG14006	FBgn0031733	FBgn0031733	CG14006
CG6899	FBgn0004368	FBgn0004368	Ptp4E
CR45693	FBgn0267257	FBgn0267257	lncRNA:CR45693
CG11371	FBgn0067779	FBgn0067779	dbr
CG13766	FBgn0031834	FBgn0031834	CG13766
CG9373	FBgn0267790	FBgn0267790	rump
CG31366	FBgn0013275	FBgn0013275	Hsp70Aa
CG7460	FBgn0036749	FBgn0036749	CG7460
CG4609	FBgn0014163	FBgn0014163	fax
CG13674	FBgn0035858	FBgn0035858	CG13674
CG4527	FBgn0035001	FBgn0035001	Slik
CG3989	FBgn0020513	FBgn0020513	Paics
CG13877	FBgn0035112	FBgn0035112	CG13877
CG8070	FBgn0033379	FBgn0033379	Mys45A
CG18769	FBgn0042185	FBgn0042185	MCU
CG7262	FBgn0038274	FBgn0038274	Nup93-2
CG8363	FBgn0020389	FBgn0020389	Papss
CG7289	FBgn0031379	FBgn0031379	CG7289
CG10359	FBgn0035452	FBgn0035452	CG10359
CG8811	FBgn0033757	FBgn0033757	muskelin
CR45797	FBgn0267447	FBgn0267447	asRNA:CR45797
CG42783	FBgn0261854	FBgn0261854	aPKC
CG32356	FBgn0001253	FBgn0001253	ImpE1
CG4281	FBgn0025626	FBgn0025626	CG4281
CG10346	FBgn0032705	FBgn0032705	Grip71
CG3061	FBgn0038195	FBgn0038195	CG3061
CG11128	FBgn0037203	FBgn0037203	slif
CG6372	FBgn0035915	FBgn0035915	S-Lap1
CG12159	FBgn0033232	FBgn0033232	CG12159
CG3605	FBgn0031493	FBgn0031493	Sf3b2
CG3313	FBgn0037980	FBgn0037980	DCAF12
CG9415	FBgn0021872	FBgn0021872	Xbp1
CG12250	FBgn0261287	FBgn0261287	ymp
CG15522	FBgn0039723	FBgn0039723	CG15522
CG3428	FBgn0036005	FBgn0036005	pall
CR46093	FBgn0267762	FBgn0267762	asRNA:CR46093
CG17202	FBgn0038043	FBgn0038043	CG17202
CG13325	FBgn0033792	FBgn0033792	CG13325
CG8525	FBgn0033735	FBgn0033735	Dera
CG42253	FBgn0259111	FBgn0259111	Ndae1
CG10833	FBgn0031689	FBgn0031689	Cyp28d1
CG1888	FBgn0033421	FBgn0033421	CG1888
CR44187	FBgn0265076	FBgn0265076	lncRNA:CR44187
CG11066	FBgn0033033	FBgn0033033	scaf
CG4180	FBgn0001977	FBgn0001977	CIAPIN1
CR43936	FBgn0264564	FBgn0264564	asRNA:CR43936
CG40411	FBgn0010247	FBgn0010247	Parp
CG6542	FBgn0027506	FBgn0027506	EDTP
CG6488	FBgn0287204	FBgn0287204	Cog8
CG9520	FBgn0032078	FBgn0032078	C1GalTA
CG18466	FBgn0010222	FBgn0010222	Nmdmc
CG10192	FBgn0260634	FBgn0260634	eIF4G2
CR42454	FBgn0083120	FBgn0083120	Uhg8
CG31922	FBgn0051922	FBgn0051922	CG31922
CG4338	FBgn0038313	FBgn0038313	CG4338
CG15201	FBgn0030272	FBgn0030272	CG15201
CG3018	FBgn0010602	FBgn0010602	lwr
CG7185	FBgn0035872	FBgn0035872	Cpsf6
CG15046	FBgn0030927	FBgn0030927	CG15046
CG5498	FBgn0027565	FBgn0027565	CG5498
CG4280	FBgn0015924	FBgn0015924	crq
CG8959	FBgn0030691	FBgn0030691	Efhc1.1
CG16717	FBgn0036028	FBgn0036028	CG16717
CG10932	FBgn0029969	FBgn0029969	CG10932
CG33126	FBgn0053126	FBgn0053126	NLaz
CG6479	FBgn0036710	FBgn0036710	CG6479
CG15098	FBgn0034398	FBgn0034398	CG15098
CG3331	FBgn0000527	FBgn0000527	e
CG2139	FBgn0028646	FBgn0028646	aralar1
CG31019	FBgn0051019	FBgn0051019	CG31019
CR45195	FBgn0266705	FBgn0266705	asRNA:CR45195
CG1910	FBgn0022349	FBgn0022349	CG1910
CG17081	FBgn0036480	FBgn0036480	Cep135
CG33947	FBgn0083068	FBgn0083068	CG33947
CG3922	FBgn0005533	FBgn0005533	RpS17
CG1817	FBgn0004370	FBgn0004370	Ptp10D
CG13659	FBgn0039319	FBgn0039319	CG13659
CG17484	FBgn0260799	FBgn0260799	p120ctn
CR44828	FBgn0266086	FBgn0266086	lncRNA:CR44828
CG30106	FBgn0050106	FBgn0050106	CCHa1-R
CG7356	FBgn0031975	FBgn0031975	Tg
CG16800	FBgn0032462	FBgn0032462	CG16800
CG8599	FBgn0003598	FBgn0003598	Su(var)3-7
CR45223	FBgn0266750	FBgn0266750	lncRNA:CR45223
CG12132	FBgn0040236	FBgn0040236	c11.1
CG11141	FBgn0033177	FBgn0033177	CG11141
CG15144	FBgn0032648	FBgn0032648	CG15144
CG3998	FBgn0270924	FBgn0270924	zf30C
CR45180	FBgn0266690	FBgn0266690	lncRNA:CR45180
CG32227	FBgn0052227	FBgn0052227	gogo
CG3328	FBgn0034985	FBgn0034985	CG3328
CG5855	FBgn0000339	FBgn0000339	cni
CG4804	FBgn0032178	FBgn0032178	Spn31A
CG1825	FBgn0010342	FBgn0010342	Map60
CG32104	FBgn0052104	FBgn0052104	CG32104
CG8094	FBgn0001187	FBgn0001187	Hex-C
CG5646	FBgn0039525	FBgn0039525	CG5646
CG8556	FBgn0014011	FBgn0014011	Rac2
CG6115	FBgn0040985	FBgn0040985	CG6115
CG14817	FBgn0026089	FBgn0026089	CG14817
CG9215	FBgn0030659	FBgn0030659	CG9215
CG31092	FBgn0051092	FBgn0051092	LpR2
CG8495	FBgn0261599	FBgn0261599	RpS29
CR44595	FBgn0265806	FBgn0265806	lncRNA:CR44595
CG5727	FBgn0032193	FBgn0032193	CG5727
CG42390	FBgn0259736	FBgn0259736	CG42390
CG5242	FBgn0037892	FBgn0037892	mRpL40
CG34002	FBgn0054002	FBgn0054002	CG34002
CG2811	FBgn0035082	FBgn0035082	CG2811
CG30445	FBgn0259977	FBgn0259977	Tdc1
CG34402	FBgn0085431	FBgn0085431	CG34402
CG34301	FBgn0085330	FBgn0085330	CG34301
CG5977	FBgn0039141	FBgn0039141	spas
CG6824	FBgn0003028	FBgn0003028	ovo
CG8121	FBgn0037680	FBgn0037680	pasi2
CG4091	FBgn0034894	FBgn0034894	sigmar
CG6741	FBgn0000008	FBgn0000008	a
CG43231	FBgn0262876	FBgn0262876	CG43231
CG9754	FBgn0034617	FBgn0034617	Panx
CG9505	FBgn0031805	FBgn0031805	Nepl4
CG13258	FBgn0032582	FBgn0032582	CG13258
CR43436	FBgn0263384	FBgn0263384	lncRNA:CR43436
CG10016	FBgn0024244	FBgn0024244	drm
CR44232	FBgn0265163	FBgn0265163	lncRNA:CR44232
CG17907	FBgn0000024	FBgn0000024	Ace
CG10523	FBgn0041100	FBgn0041100	park
CG32697	FBgn0028341	FBgn0028341	Ptpmeg2
CG6192	FBgn0032341	FBgn0032341	Reps
CG15332	FBgn0029986	FBgn0029986	CG15332
CG1441	FBgn0033464	FBgn0033464	CG1441
CG9097	FBgn0004870	FBgn0004870	bab1
CG8818	FBgn0033751	FBgn0033751	CG8818
CR44119	FBgn0264950	FBgn0264950	asRNA:CR44119
CG8254	FBgn0041156	FBgn0041156	exex
CG10772	FBgn0004509	FBgn0004509	Fur1
CG1171	FBgn0004552	FBgn0004552	Akh
CG34362	FBgn0085391	FBgn0085391	trv
CG12077	FBgn0035435	FBgn0035435	PIG-C
CG13222	FBgn0033602	FBgn0033602	Cpr47Ee
CG14340	FBgn0031302	FBgn0031302	CG14340
CG11887	FBgn0033540	FBgn0033540	Elp2
CG10465	FBgn0033017	FBgn0033017	CG10465
CG12223	FBgn0278608	FBgn0278608	Dsp1
CG6563	FBgn0038306	FBgn0038306	Art3
CR45996	FBgn0267658	FBgn0267658	lncRNA:CR45996
CG10513	FBgn0039311	FBgn0039311	CG10513
CG31195	FBgn0051195	FBgn0051195	CG31195
CR43602	FBgn0263487	FBgn0263487	scaRNA:PsiU5-44
CR44404		-	-
CG2861	FBgn0029728	FBgn0029728	CG2861
CG7130	FBgn0037151	FBgn0037151	CG7130
CR44922	FBgn0266227	FBgn0266227	lncRNA:CR44922
CG14186	FBgn0036935	FBgn0036935	CG14186
CG4980	FBgn0039558	FBgn0039558	BCAS2
CG13679	FBgn0035856	FBgn0035856	CG13679
CG12024	FBgn0035283	FBgn0035283	CG12024
CG18107	FBgn0034330	FBgn0034330	Bom107
CG31548	FBgn0051548	FBgn0051548	CG31548
CG32854	FBgn0044511	FBgn0044511	mRpS21
CG14685	FBgn0037831	FBgn0037831	Cap-H2
CG17492	FBgn0086442	FBgn0086442	mib2
CG9127	FBgn0000052	FBgn0000052	Pfas
CG31174	FBgn0051174	FBgn0051174	CG31174
CG46281	FBgn0283439	FBgn0283439	CG46281
CG4269	FBgn0034741	FBgn0034741	CG4269
CG7718	FBgn0038649	FBgn0038649	CG7718
CG1349	FBgn0039802	FBgn0039802	dj-1beta
CG8376	FBgn0267978	FBgn0267978	ap
CG31626	FBgn0051626	FBgn0051626	CG31626
CG1970	FBgn0039909	FBgn0039909	ND-49
CG1970	FBgn0086839	FBgn0086839	Dpse\GA25154
CG1742	FBgn0025814	FBgn0025814	Mgstl
CG11518	FBgn0043900	FBgn0043900	pygo
CG6725	FBgn0040271	FBgn0040271	Sulf1
CG4087	FBgn0002593	FBgn0002593	RpLP1
CR44899	FBgn0266204	FBgn0266204	lncRNA:CR44899
CG17904	FBgn0032597	FBgn0032597	CG17904
CR45827	FBgn0267477	FBgn0267477	asRNA:CR45827
CG13566	FBgn0034942	FBgn0034942	CG13566
CG32476	FBgn0052476	FBgn0052476	mthl14
CG12755	FBgn0002440	FBgn0002440	l(3)mbn
CR34605	FBgn0083011	FBgn0083011	snoRNA:Psi28S-1135b
CG13622	FBgn0039202	FBgn0039202	CG13622
CG2125	FBgn0004859	FBgn0004859	ci
CG10189	FBgn0032793	FBgn0032793	CG10189
CG11335	FBgn0039848	FBgn0039848	Loxl1
CG9913	FBgn0038205	FBgn0038205	Kif19A
CG34139	FBgn0083975	FBgn0083975	Nlg4
CG31147	FBgn0045443	FBgn0045443	mthl11
CG42636	FBgn0266136	FBgn0266136	Gyc76C
CG5632	FBgn0036263	FBgn0036263	thoc6
CG10521	FBgn0015774	FBgn0015774	NetB
CG9327	FBgn0261394	FBgn0261394	Prosalpha3
CR45798	FBgn0267448	FBgn0267448	asRNA:CR45798
CG18067	FBgn0034512	FBgn0034512	CG18067
CG12861	FBgn0033953	FBgn0033953	CG12861
CG13739	FBgn0033403	FBgn0033403	CG13739
CG9070	FBgn0086519	FBgn0086519	Cpr47Eg
CG13867	FBgn0034503	FBgn0034503	MED8
CG30056	FBgn0050056	FBgn0050056	CG30056
CG1414	FBgn0024251	FBgn0024251	bbx
CG8152	FBgn0034008	FBgn0034008	CG8152
CR46089	FBgn0267758	FBgn0267758	asRNA:CR46089
CR46004	FBgn0267666	FBgn0267666	lncRNA:CR46004
CG44012	FBgn0266756	FBgn0266756	btsz
CG34043	FBgn0054043	FBgn0054043	CG34043
CG10637	FBgn0015772	FBgn0015772	Nak
CR45902	FBgn0267562	FBgn0267562	lncRNA:CR45902
CG43119	FBgn0262579	FBgn0262579	Ect4
CG6388	FBgn0032430	FBgn0032430	CG6388
CG6146	FBgn0004924	FBgn0004924	Top1
CG32418	FBgn0052418	FBgn0052418	vito
CG1311	FBgn0035523	FBgn0035523	Ctl1
CG11309	FBgn0037070	FBgn0037070	CG11309
CG3848	FBgn0023518	FBgn0023518	trr
CR45000	FBgn0266351	FBgn0266351	asRNA:CR45000
CG40813	FBgn0085521	FBgn0085521	CG40813
CG6913	FBgn0037937	FBgn0037937	Fer3
CG42338	FBgn0267001	FBgn0267001	Ten-a
CG9668	FBgn0003250	FBgn0003250	Rh4
CG17639	FBgn0038029	FBgn0038029	GstD11
CG12945	FBgn0037755	FBgn0037755	CG12945
CG30324	FBgn0050324	FBgn0050324	CG30324
CG13822	FBgn0039098	FBgn0039098	GILT3
CG11007	FBgn0034455	FBgn0034455	CG11007
CG32700	FBgn0267253	FBgn0267253	CG32700
CG32700	FBgn0083446	FBgn0083446	Dsim\GD16059
CG1099	FBgn0023388	FBgn0023388	Dap160
CG17219	FBgn0031494	FBgn0031494	CG17219
CG9969	FBgn0035382	FBgn0035382	Or63a
CG5948	FBgn0039386	FBgn0039386	CG5948
CG5793	FBgn0038858	FBgn0038858	CG5793
CG4510	FBgn0038746	FBgn0038746	Surf6
CG18111	FBgn0039678	FBgn0039678	Obp99a
CG17544	FBgn0032775	FBgn0032775	CG17544
CG11527	FBgn0011722	FBgn0011722	Tig
CG31475	FBgn0051475	FBgn0051475	CG31475
CG34264	FBgn0284444	FBgn0284444	ddbt
CG42402	FBgn0259821	FBgn0259821	CG42402
CG3566	FBgn0029854	FBgn0029854	CG3566
CG42840	FBgn0262029	FBgn0262029	d
CG12532	FBgn0010380	FBgn0010380	AP-1-2beta
CG12014	FBgn0035445	FBgn0035445	Ids
CG13096	FBgn0032050	FBgn0032050	CG13096
CG14620	FBgn0014395	FBgn0014395	tilB
CG15693	FBgn0019936	FBgn0019936	RpS20
CG14975	FBgn0064227	FBgn0064227	Rdh
CG8171	FBgn0000996	FBgn0000996	dup
CR44809	FBgn0266044	FBgn0266044	lncRNA:CR44809
CG3329	FBgn0023174	FBgn0023174	Prosbeta2
CG8859	FBgn0033696	FBgn0033696	Cyp6g2
CG17762	FBgn0030412	FBgn0030412	Tomosyn
CG11228	FBgn0261456	FBgn0261456	hpo
CR34078	FBgn0013704	FBgn0013704	mt:tRNA:Arg-TCG
CG44243	FBgn0265178	FBgn0265178	CG44243
CG6601	FBgn0015797	FBgn0015797	Rab6
CG31864	FBgn0051864	FBgn0051864	Qtzl
CG3639	FBgn0031282	FBgn0031282	Pex12
CG40050	FBgn0287185	FBgn0287185	nvd
CG42277	FBgn0267337	FBgn0267337	rn
CG2346	FBgn0000715	FBgn0000715	FMRFa
CG31022	FBgn0039776	FBgn0039776	PH4alphaEFB
CG30154	FBgn0050154	FBgn0050154	CG30154
CG17632	FBgn0000241	FBgn0000241	bw
CG31414	FBgn0051414	FBgn0051414	Gba1b
CR43641	FBgn0263650	FBgn0263650	lncRNA:CR43641
CG7650	FBgn0036519	FBgn0036519	CG7650
CG5161	FBgn0266724	FBgn0266724	Trs20
CR32194	FBgn0052194	FBgn0052194	lncRNA:CR32194
CR43431	FBgn0263379	FBgn0263379	lncRNA:CR43431
CG1937	FBgn0039875	FBgn0039875	sip3
CG5191	FBgn0038803	FBgn0038803	CG5191
CG31223	FBgn0051223	FBgn0051223	CG31223
CG3168	FBgn0029896	FBgn0029896	CG3168
CG12493	FBgn0035571	FBgn0035571	CG12493
CR46265	FBgn0275433	FBgn0275433	lncRNA:CR46265
CG17420	FBgn0028697	FBgn0028697	RpL15
CG3947	FBgn0037019	FBgn0037019	Pex16
CG12676	FBgn0000547	FBgn0000547	ed
CG11221	FBgn0031855	FBgn0031855	meng
CG7135	FBgn0030895	FBgn0030895	CG7135
CG4654	FBgn0011763	FBgn0011763	Dp
CG4016	FBgn0086532	FBgn0086532	Spt-I
CG4753	FBgn0036622	FBgn0036622	Agpat4
CG4206	FBgn0284442	FBgn0284442	Mcm3
CG1785	FBgn0030061	FBgn0030061	CG1785
CG3492	FBgn0035007	FBgn0035007	CG3492
CG8025	FBgn0036916	FBgn0036916	Mtr3
CG14207	FBgn0031037	FBgn0031037	CG14207
CG15744	FBgn0030466	FBgn0030466	CG15744
CG17141	FBgn0039020	FBgn0039020	CG17141
CG11154	FBgn0010217	FBgn0010217	ATPsynbeta
CG11154	FBgn0243540	FBgn0243540	Dpse\ATPsyn-beta
CG30388	FBgn0034590	FBgn0034590	Magi
CG15266	FBgn0259982	FBgn0259982	Uxt
CG7988	FBgn0038582	FBgn0038582	CG7988
CG14145	FBgn0036118	FBgn0036118	Blos2
CG34421	FBgn0085450	FBgn0085450	Snoo
CG13213	FBgn0033609	FBgn0033609	Fbl6
CG15651	FBgn0034567	FBgn0034567	CG15651
CG33774	FBgn0053774	FBgn0053774	CG33774
CR45566	FBgn0267126	FBgn0267126	lncRNA:CR45566
CR43558	FBgn0263573	FBgn0263573	mir-4942
CR45918	FBgn0267578	FBgn0267578	lncRNA:CR45918
CG2031	FBgn0037382	FBgn0037382	Hpr1
CG15441	FBgn0019982	FBgn0019982	Gs1l
CG14010	FBgn0031725	FBgn0031725	DIP-eta
CG6439	FBgn0038922	FBgn0038922	Idh3b
CG13775	FBgn0031874	FBgn0031874	CG13775
CG6583	FBgn0032420	FBgn0032420	CG6583
CG31666	FBgn0086758	FBgn0086758	chinmo
CG31666	FBgn0194496	FBgn0194496	Dsim\chinmo
CG31666	FBgn0076394	FBgn0076394	Dpse\chinmo
CG3039	FBgn0004646	FBgn0004646	ogre
CG3039	FBgn0027524	FBgn0027524	CG3909
CG4247	FBgn0038307	FBgn0038307	mRpS10
CG4659	FBgn0010747	FBgn0010747	Srp54k
CG43689	FBgn0263772	FBgn0263772	CG43689
CG31426	FBgn0041588	FBgn0041588	eIF2D
CG3876	FBgn0031284	FBgn0031284	PGAP2
CG9637	FBgn0038165	FBgn0038165	Task6
CG10268	FBgn0032811	FBgn0032811	CG10268
CG33048	FBgn0263241	FBgn0263241	Mocs1
CG17524	FBgn0063497	FBgn0063497	GstE3
CG13422	FBgn0034511	FBgn0034511	GNBP-like3
CG30425	FBgn0066084	FBgn0066084	RpL41
CG9422	FBgn0033092	FBgn0033092	CG9422
CG2617	FBgn0032877	FBgn0032877	CG2617
CG3632	FBgn0030735	FBgn0030735	CG3632
CG9728	FBgn0039780	FBgn0039780	PH4alphaNE1
CG8208	FBgn0027950	FBgn0027950	MBD-like
CG8134	FBgn0030671	FBgn0030671	CG8134
CR44834	FBgn0266097	FBgn0266097	lncRNA:CR44834
CG30110	FBgn0050110	FBgn0050110	CG30110
CG7266	FBgn0000565	FBgn0000565	Eip71CD
CG4141	FBgn0015279	FBgn0015279	Pi3K92E
CG3652	FBgn0031600	FBgn0031600	CG3652
CR31850	FBgn0004191	FBgn0004191	snRNA:U2:34ABa
CG30415	FBgn0250838	FBgn0250838	roh
CG40002	FBgn0058002	FBgn0058002	ND-AGGG
CG40002	FBgn0243584	FBgn0243584	Dpse\GA17837
CG14372	FBgn0038156	FBgn0038156	side-IV
CG17446	FBgn0030121	FBgn0030121	Cfp1
CG3480	FBgn0023509	FBgn0023509	mip130
CG2530	FBgn0010313	FBgn0010313	corto
CG5499	FBgn0001197	FBgn0001197	His2Av
CG30466	FBgn0050466	FBgn0050466	CG30466
CG12653	FBgn0000233	FBgn0000233	btd
CG2702	FBgn0037540	FBgn0037540	Pbp95
CG11848	FBgn0039282	FBgn0039282	Bili
CG15697	FBgn0038834	FBgn0038834	RpS30
CG1692	FBgn0002641	FBgn0002641	mal
CG30379	FBgn0050379	FBgn0050379	CG30379
CG8651	FBgn0003862	FBgn0003862	trx
CG17876	FBgn0000078	FBgn0000078	Amy-d
CG13366	FBgn0025633	FBgn0025633	CG13366
CR44410	FBgn0265583	FBgn0265583	lncRNA:CR44410
CG31323	FBgn0051323	FBgn0051323	CG31323
CG11456	FBgn0037031	FBgn0037031	CG11456
CG13924	FBgn0035286	FBgn0035286	CG13924
CG3294	FBgn0031628	FBgn0031628	CG3294
CG14483	FBgn0034248	FBgn0034248	CG14483
CG10572	FBgn0015618	FBgn0015618	Cdk8
CG15638	FBgn0028943	FBgn0028943	CG15638
CG4421	FBgn0010044	FBgn0010044	GstD8
CG4899	FBgn0011693	FBgn0011693	Pdh
CG33323	FBgn0037475	FBgn0037475	Fer1
CG9134	FBgn0035199	FBgn0035199	tfc
CG7758	FBgn0027945	FBgn0027945	ppl
CG12841	FBgn0033133	FBgn0033133	Tsp42Ek
CG3533	FBgn0004055	FBgn0004055	uzip
CG1076	FBgn0037402	FBgn0037402	Vha14-2
CG42788	FBgn0261859	FBgn0261859	CG42788
CG5835	FBgn0038682	FBgn0038682	CG5835
CG3915	FBgn0033791	FBgn0033791	Drl-2
CG1464	FBgn0005558	FBgn0005558	ey
CG13650	FBgn0039277	FBgn0039277	Nepl16
CG7059	FBgn0038957	FBgn0038957	CG7059
CG6963	FBgn0250823	FBgn0250823	gish
CG11194	FBgn0027788	FBgn0027788	Hey
CR43503	FBgn0263518	FBgn0263518	mir-4975
CG8677	FBgn0026577	FBgn0026577	CG8677
CG15738	FBgn0030352	FBgn0030352	sicily
CR44977	FBgn0266312	FBgn0266312	lncRNA:CR44977
CG9449	FBgn0036875	FBgn0036875	CG9449
CG3149	FBgn0027564	FBgn0027564	CG3149
CG11426	FBgn0037166	FBgn0037166	CG11426
CR45412	FBgn0266961	FBgn0266961	lncRNA:CR45412
CG1750	FBgn0039836	FBgn0039836	CG1750
CG9380	FBgn0035094	FBgn0035094	CG9380
CG1021	FBgn0037443	FBgn0037443	Dmtn
CG12576	FBgn0031190	FBgn0031190	CG12576
CG9946	FBgn0261609	FBgn0261609	eIF2alpha
CG4008	FBgn0283478	FBgn0283478	und
CG18001	FBgn0040007	FBgn0040007	RpL38
CG34385	FBgn0085414	FBgn0085414	dpr12
CG14562	FBgn0037142	FBgn0037142	CG14562
CG2054	FBgn0022702	FBgn0022702	Cht2
CG5660	FBgn0035942	FBgn0035942	ValRS-m
CG1218	FBgn0037377	FBgn0037377	CG1218
CG12262	FBgn0035811	FBgn0035811	Mcad
CG44086	FBgn0264895	FBgn0264895	RapGAP1
CG1895	FBgn0030339	FBgn0030339	Cyp28c1
CG6052	FBgn0036747	FBgn0036747	CG6052
CG10566	FBgn0037050	FBgn0037050	ICA69
CG17834	FBgn0028394	FBgn0028394	CG17834
CG14855	FBgn0038260	FBgn0038260	CG14855
CG9257	FBgn0032916	FBgn0032916	CG9257
CG12345	FBgn0000303	FBgn0000303	ChAT
CG12345	FBgn0270928	FBgn0270928	VAChT
CG14797	FBgn0029587	FBgn0029587	CG14797
CG1373	FBgn0000279	FBgn0000279	CecC
CR45960	FBgn0267622	FBgn0267622	asRNA:CR45960
CG10711	FBgn0086785	FBgn0086785	Vps36
CG9742	FBgn0261791	FBgn0261791	SNRPG
CG12384	FBgn0033624	FBgn0033624	CG12384
CG12857	FBgn0033963	FBgn0033963	CG12857
CG10691	FBgn0002031	FBgn0002031	l(2)37Cc
CG34409	FBgn0085438	FBgn0085438	CG34409
CG6093	FBgn0000018	FBgn0000018	abo
CG12213	FBgn0260742	FBgn0260742	CG12213
CG10255	FBgn0033984	FBgn0033984	Lap1
CG3301	FBgn0038878	FBgn0038878	CG3301
CG1625	FBgn0033447	FBgn0033447	dila
CG1625	FBgn0088517	FBgn0088517	Dana\GF11477
CG1625	FBgn0207965	FBgn0207965	Dvir\GJ20828
CG32556	FBgn0263258	FBgn0263258	chas
CG30077	FBgn0050077	FBgn0050077	Blos1
CG9984	FBgn0010416	FBgn0010416	TH1
CG10975	FBgn0014007	FBgn0014007	Ptp69D
CG5427	FBgn0032433	FBgn0032433	Oatp33Ea
CG32451	FBgn0052451	FBgn0052451	SPoCk
CG8864	FBgn0028940	FBgn0028940	Cyp28a5
CG7035	FBgn0022942	FBgn0022942	Cbp80
CG10149	FBgn0028689	FBgn0028689	Rpn6
CG1897	FBgn0000492	FBgn0000492	Dr
CR45919	FBgn0267579	FBgn0267579	lncRNA:CR45919
CG32971	FBgn0052971	FBgn0052971	CG32971
CG10664	FBgn0032833	FBgn0032833	COX4
CG10664	FBgn0070535	FBgn0070535	Dpse\GA10478
CG44099	FBgn0264908	FBgn0264908	pHCl-1
CG7824	FBgn0039711	FBgn0039711	CG7824
CG5500	FBgn0039461	FBgn0039461	CG5500
CG14275	FBgn0032022	FBgn0032022	CG14275
CG4254	FBgn0011726	FBgn0011726	tsr
CG43347	FBgn0263072	FBgn0263072	CG43347
CG3469	FBgn0015000	FBgn0015000	betaggt-I
CG33087	FBgn0053087	FBgn0053087	LRP1
CG32645	FBgn0052645	FBgn0052645	CG32645
CG14762	FBgn0033250	FBgn0033250	CG14762
CG33717	FBgn0260458	FBgn0260458	PGRP-LD
CG17650	FBgn0031365	FBgn0031365	CG17650
CR43152	FBgn0262682	FBgn0262682	asRNA:CR43152
CG7166	FBgn0037107	FBgn0037107	CG7166
CG32666	FBgn0052666	FBgn0052666	Drak
CG13293	FBgn0035677	FBgn0035677	CG13293
CR45337	FBgn0266876	FBgn0266876	lncRNA:CR45337
CG17919	FBgn0037433	FBgn0037433	CG17919
CR45007	FBgn0266359	FBgn0266359	asRNA:CR45007
CG17515	FBgn0039966	FBgn0039966	Rab21
CG4963	FBgn0039561	FBgn0039561	mfrn
CG7409	FBgn0035817	FBgn0035817	CG7409
CG12608	FBgn0030630	FBgn0030630	CG12608
CG12608	FBgn0071767	FBgn0071767	Dpse\GA11717
CG17828	FBgn0016038	FBgn0016038	Vsp37A
CG5589	FBgn0036754	FBgn0036754	CG5589
CG17686	FBgn0024807	FBgn0024807	DIP1
CG6816	FBgn0010383	FBgn0010383	Cyp18a1
CG3151	FBgn0010263	FBgn0010263	Rbp9
CG7125	FBgn0038603	FBgn0038603	PKD
CG3423	FBgn0020616	FBgn0020616	SA
CG4133	FBgn0031257	FBgn0031257	CG4133
CG32540	FBgn0030954	FBgn0030954	CCKLR-17D3
CR45124	FBgn0266617	FBgn0266617	asRNA:CR45124
CG13085	FBgn0032780	FBgn0032780	CG13085
CG30054	FBgn0050054	FBgn0050054	CG30054
CG34231	FBgn0085260	FBgn0085260	CG34231
CG14823	FBgn0035734	FBgn0035734	CG14823
CG1528	FBgn0028968	FBgn0028968	gammaCOP
CG13108	FBgn0032100	FBgn0032100	CG13108
CG15916	FBgn0030704	FBgn0030704	CG15916
CG31904	FBgn0260479	FBgn0260479	CG31904
CG10333	FBgn0032690	FBgn0032690	CG10333
CG6673	FBgn0035906	FBgn0035906	GstO2
CG5734	FBgn0032191	FBgn0032191	Snx17
CR34622	FBgn0082975	FBgn0082975	snoRNA:Psi28S-3305b
CG10604	FBgn0000529	FBgn0000529	bsh
CG32409	FBgn0052409	FBgn0052409	CG32409
CG8441	FBgn0034086	FBgn0034086	CG8441
CG9773	FBgn0037609	FBgn0037609	CG9773
CG4035	FBgn0015218	FBgn0015218	eIF4E1
CG11242	FBgn0034451	FBgn0034451	TBCB
CG32594	FBgn0052594	FBgn0052594	be
CG5468	FBgn0039434	FBgn0039434	TwdlM
CG31258	FBgn0266916	FBgn0266916	Cenp-C
CG14868	FBgn0038330	FBgn0038330	CG14868
CG13033	FBgn0036638	FBgn0036638	CG13033
CG42392	FBgn0259738	FBgn0259738	CG42392
CG5828	FBgn0031682	FBgn0031682	CG5828
CG6806	FBgn0002565	FBgn0002565	Lsp2
CG31447	FBgn0043069	FBgn0043069	MESK4
CG6425	FBgn0039449	FBgn0039449	CG6425
CG8545	FBgn0033741	FBgn0033741	CG8545
CG3394	FBgn0034999	FBgn0034999	Fatp3
CG7598	FBgn0039689	FBgn0039689	CIA30
CG7598	FBgn0080464	FBgn0080464	Dpse\GA20469
CG10579	FBgn0005640	FBgn0005640	Eip63E
CG17048	FBgn0033828	FBgn0033828	CG17048
CG6138	FBgn0032268	FBgn0032268	CG6138
CG11562	FBgn0031247	FBgn0031247	CG11562
CG4233	FBgn0001125	FBgn0001125	Got2
CG13333	FBgn0033855	FBgn0033855	link
CG3980	FBgn0031575	FBgn0031575	Cep97
CG31955	FBgn0051955	FBgn0051955	CG31955
CG3772	FBgn0025680	FBgn0025680	cry
CG12752	FBgn0028411	FBgn0028411	Nxt1
CG7246	FBgn0030081	FBgn0030081	CG7246
CG7398	FBgn0024921	FBgn0024921	Tnpo
CG4949	FBgn0030813	FBgn0030813	CG4949
CG6401	FBgn0034270	FBgn0034270	PIG-A
CG6875	FBgn0000140	FBgn0000140	asp
CG16953	FBgn0038809	FBgn0038809	CG16953
CG34157	FBgn0260003	FBgn0260003	Dys
CG4622	FBgn0035021	FBgn0035021	CG4622
CG10949	FBgn0032858	FBgn0032858	CG10949
CG32699	FBgn0052699	FBgn0052699	LPCAT
CG8806	FBgn0033413	FBgn0033413	prel
CG9391	FBgn0037063	FBgn0037063	CG9391
CG8833	FBgn0036386	FBgn0036386	CG8833
CG42230	FBgn0087007	FBgn0087007	bbg
CG3191	FBgn0023525	FBgn0023525	CG3191
CG14401	FBgn0032900	FBgn0032900	CG14401
CG3161	FBgn0262736	FBgn0262736	Vha16-1
CR43855	FBgn0264437	FBgn0264437	lncRNA:CR43855
CG31783	FBgn0002939	FBgn0002939	ninaD
CG7437	FBgn0262737	FBgn0262737	mub
CG30338	FBgn0050338	FBgn0050338	CG30338
CG34250	FBgn0085279	FBgn0085279	CG34250
CG45428	FBgn0266977	FBgn0266977	CG45428
CG10741	FBgn0036373	FBgn0036373	Tgi
CG4999	FBgn0035936	FBgn0035936	Tsp66E
CG5081	FBgn0267849	FBgn0267849	Syx7
CG11652	FBgn0036194	FBgn0036194	Dph1
CG13484	FBgn0036406	FBgn0036406	CG13484
CG8276	FBgn0263144	FBgn0263144	bin3
CG9674	FBgn0036663	FBgn0036663	CG9674
CG33473	FBgn0040765	FBgn0040765	luna
CG15088	FBgn0034381	FBgn0034381	List
CG16865	FBgn0028919	FBgn0028919	CG16865
CG17509	FBgn0260012	FBgn0260012	pds5
CG7851	FBgn0032013	FBgn0032013	Scgalpha
CG14508	FBgn0039651	FBgn0039651	Cyt-c1L
CG14508	FBgn0073077	FBgn0073077	Dpse\GA13039
CG5063	FBgn0038327	FBgn0038327	Trax
CG14609	FBgn0037483	FBgn0037483	CG14609
CG14609	FBgn0073146	FBgn0073146	Dpse\GA13108
CG32549	FBgn0052549	FBgn0052549	CG32549
CG10160	FBgn0001258	FBgn0001258	Ldh
CG1902	FBgn0033434	FBgn0033434	CG1902
CG33101	FBgn0266464	FBgn0266464	Nsf2
CG2211	FBgn0035211	FBgn0035211	CG2211
CR43958	FBgn0264618	FBgn0264618	lncRNA:CR43958
CG15083	FBgn0034399	FBgn0034399	CG15083
CG4719	FBgn0027508	FBgn0027508	Tnks
CG33505	FBgn0053505	FBgn0053505	U3-55K
CG43675	FBgn0263750	FBgn0263750	CG43675
CG1550	FBgn0033225	FBgn0033225	TTLL12
CG6541	FBgn0028412	FBgn0028412	Mst33A
CG15883	FBgn0030985	FBgn0030985	Obp18a
CG7338	FBgn0037073	FBgn0037073	Tsr1
CR42860	FBgn0262107	FBgn0262107	asRNA:CR42860
CG17816	FBgn0037525	FBgn0037525	CG17816
CG4685	FBgn0039349	FBgn0039349	Ssadh
CG15220	FBgn0266421	FBgn0266421	RPA3
CG6649	FBgn0026314	FBgn0026314	Ugt35B1
CG34414	FBgn0085443	FBgn0085443	spri
CG12355	FBgn0040805	FBgn0040805	CG12355
CR45152	FBgn0266645	FBgn0266645	asRNA:CR45152
CG10031	FBgn0031563	FBgn0031563	CG10031
CG3371	FBgn0035153	FBgn0035153	ebd1
CG17386	FBgn0033936	FBgn0033936	Achl
CG6061	FBgn0033846	FBgn0033846	mip120
CG2021	FBgn0035271	FBgn0035271	CG2021
CG8241	FBgn0086895	FBgn0086895	pea
CG14637	FBgn0015331	FBgn0015331	abs
CG8465	FBgn0028343	FBgn0028343	Ankle2
CG9492	FBgn0037726	FBgn0037726	CG9492
CG13151	FBgn0033750	FBgn0033750	CG13151
CG17359	FBgn0036396	FBgn0036396	CG17359
CG10151	FBgn0033960	FBgn0033960	CG10151
CG12947	FBgn0037753	FBgn0037753	CG12947
CG12405	FBgn0033520	FBgn0033520	Prx2540-1
CG5052	FBgn0003087	FBgn0003087	pim
CG7041	FBgn0030082	FBgn0030082	HP1b
CG9663	FBgn0031516	FBgn0031516	CG9663
CG7210	FBgn0001301	FBgn0001301	kel
CG7879	FBgn0035235	FBgn0035235	CG7879
CG10440	FBgn0034636	FBgn0034636	twz
CG12855	FBgn0033973	FBgn0033973	HPS1
CG5300	FBgn0032243	FBgn0032243	Klp31E
CG7003	FBgn0036486	FBgn0036486	Msh6
CR45149	FBgn0266642	FBgn0266642	asRNA:CR45149
CG31020	FBgn0260440	FBgn0260440	spdo
CG18374	FBgn0025592	FBgn0025592	Gk1
CG5410	FBgn0039140	FBgn0039140	Miro
CG3172	FBgn0038206	FBgn0038206	twf
CG43925	FBgn0264546	FBgn0264546	CG43925
CG14490	FBgn0034281	FBgn0034281	CG14490
CG45074	FBgn0266450	FBgn0266450	Kr-h1
CG3810	FBgn0023511	FBgn0023511	Edem1
CG15765	FBgn0029814	FBgn0029814	CG15765
CR44844	FBgn0266138	FBgn0266138	lncRNA:CR44844
CG4678	FBgn0030778	FBgn0030778	CG4678
CR43585	FBgn0263470	FBgn0263470	snoRNA:Tudor-SN-a
CG12934	FBgn0033541	FBgn0033541	CG12934
CG42534	FBgn0260487	FBgn0260487	CG42534
CG31190	FBgn0261046	FBgn0261046	Dscam3
CG43921	FBgn0264542	FBgn0264542	hwt
CG32179	FBgn0052179	FBgn0052179	Krn
CG12121	FBgn0030109	FBgn0030109	CG12121
CG8397	FBgn0034066	FBgn0034066	CG8397
CR43875	FBgn0264467	FBgn0264467	asRNA:CR43875
CR44197	FBgn0265086	FBgn0265086	lncRNA:CR44197
CG10620	FBgn0036299	FBgn0036299	Tsf2
CG11586	FBgn0035520	FBgn0035520	CG11586
CG31998	FBgn0051998	FBgn0051998	CG31998
CR45659	FBgn0267219	FBgn0267219	lncRNA:CR45659
CG12701	FBgn0259789	FBgn0259789	zld
CG16974	FBgn0032479	FBgn0032479	CG16974
CG7067	FBgn0024945	FBgn0024945	NitFhit
CG8013	FBgn0020887	FBgn0020887	Su(z)12
CG10279	FBgn0003261	FBgn0003261	Rm62
CG17352	FBgn0035880	FBgn0035880	Culd
CG4780	FBgn0260856	FBgn0260856	Membrin
CG9270	FBgn0032908	FBgn0032908	CG9270
CG11671	FBgn0037562	FBgn0037562	Nazo
CG7847	FBgn0003499	FBgn0003499	sr
CG6191	FBgn0027581	FBgn0027581	CG6191
CG9289	FBgn0032058	FBgn0032058	CG9289
CG6230	FBgn0027582	FBgn0027582	CG6230
CG8302	FBgn0034053	FBgn0034053	Cyp4aa1
CG5254	FBgn0040383	FBgn0040383	CG5254
CG18177	FBgn0036039	FBgn0036039	Naa60
CG6145	FBgn0033853	FBgn0033853	CG6145
CG3493	FBgn0034854	FBgn0034854	Golgin245
CG10890	FBgn0002887	FBgn0002887	mus201
CG5697	FBgn0038846	FBgn0038846	CG5697
CG12105	FBgn0035241	FBgn0035241	CG12105
CG13389	FBgn0010265	FBgn0010265	RpS13
CG14802	FBgn0026873	FBgn0026873	MED18
CG32655	FBgn0052655	FBgn0052655	CG32655
CG6214	FBgn0032456	FBgn0032456	MRP
CG11294	FBgn0030058	FBgn0030058	CG11294
CG14265	FBgn0040393	FBgn0040393	CG14265
CG8036	FBgn0037607	FBgn0037607	CG8036
CG11199	FBgn0046704	FBgn0046704	Liprin-alpha
CG5140	FBgn0034314	FBgn0034314	nopo
CG2038	FBgn0028836	FBgn0028836	CSN7
CR46075	FBgn0267744	FBgn0267744	lncRNA:CR46075
CG4042	FBgn0037018	FBgn0037018	CG4042
CG3386	FBgn0035152	FBgn0035152	CG3386
CG32711	FBgn0262976	FBgn0262976	lawc
CG31133	FBgn0051133	FBgn0051133	Slimp
CR46024	FBgn0267688	FBgn0267688	lncRNA:CR46024
CG9826	FBgn0034784	FBgn0034784	CG9826
CG3071	FBgn0023527	FBgn0023527	CG3071
CG3071	FBgn0068685	FBgn0068685	Dsim\GD16604
CG8841	FBgn0033713	FBgn0033713	CG8841
CG14645	FBgn0040687	FBgn0040687	CG14645
CG42732	FBgn0261698	FBgn0261698	SLO2
CG4050	FBgn0020312	FBgn0020312	Tmtc3
CR43836	FBgn0264384	FBgn0264384	lncRNA:CR43836
CG1070	FBgn0261238	FBgn0261238	Alh
CG10580	FBgn0011591	FBgn0011591	fng
CG11898	FBgn0039645	FBgn0039645	CG11898
CG15367	FBgn0040467	FBgn0040467	Dlip1
CG40494	FBgn0025836	FBgn0025836	RhoGAP1A
CG4565	FBgn0037841	FBgn0037841	CG4565
CG10897	FBgn0033636	FBgn0033636	tou
CG31045	FBgn0026059	FBgn0026059	Mhcl
CG13076	FBgn0044028	FBgn0044028	Notum
CG3570	FBgn0035035	FBgn0035035	Samtor
CR32207	FBgn0052207	FBgn0052207	hpRNA:CR32207
CG9802	FBgn0015615	FBgn0015615	SMC3
CR34534	FBgn0082939	FBgn0082939	snoRNA:Me28S-C3227b
CG6669	FBgn0017590	FBgn0017590	klg
CG6173	FBgn0039155	FBgn0039155	Kal1
CG9850	FBgn0034903	FBgn0034903	sona
CG42351	FBgn0259682	FBgn0259682	Jabba
CG17985	FBgn0033199	FBgn0033199	CG17985
CG16707	FBgn0045823	FBgn0045823	vsg
CG9063	FBgn0028500	FBgn0028500	Rich
CG42543	FBgn0260660	FBgn0260660	Mp
CG7568	FBgn0039673	FBgn0039673	CG7568
CG42673	FBgn0261555	FBgn0261555	CG42673
CR44217	FBgn0265148	FBgn0265148	lncRNA:CR44217
CG5560	FBgn0030607	FBgn0030607	dob
CG32176	FBgn0052176	FBgn0052176	CG32176
CG10688	FBgn0036300	FBgn0036300	Pmm2
CG4162	FBgn0002524	FBgn0002524	lace
CG6632	FBgn0030945	FBgn0030945	Ing3
CG8856	FBgn0020377	FBgn0020377	Sr-CII
CG9847	FBgn0010470	FBgn0010470	Fkbp14
CG11753	FBgn0037603	FBgn0037603	CG11753
CG12171	FBgn0037354	FBgn0037354	CG12171
CG12783	FBgn0038448	FBgn0038448	CG12783
CG10560	FBgn0039325	FBgn0039325	CG10560
CG10809	FBgn0036052	FBgn0036052	CG10809
CG8110	FBgn0024187	FBgn0024187	syd
CG42575	FBgn0260795	FBgn0260795	NaPi-III
CG1241	FBgn0044452	FBgn0044452	Atg2
CG1241	FBgn0084221	FBgn0084221	Dsim\GD13707
CG11597	FBgn0036212	FBgn0036212	CG11597
CG8249	FBgn0034045	FBgn0034045	CG8249
CG2275	FBgn0001291	FBgn0001291	Jra
CG10882	FBgn0262126	FBgn0262126	Sec24CD
CG9901	FBgn0011742	FBgn0011742	Arp2
CG2650	FBgn0000092	FBgn0000092	dyw
CG2650	FBgn0063996	FBgn0063996	Dsim\GD24605
CG32601	FBgn0052601	FBgn0052601	betaNACtes3
CG10157	FBgn0039099	FBgn0039099	GILT2
CG31212	FBgn0086613	FBgn0086613	Ino80
CG4424	FBgn0038765	FBgn0038765	CG4424
CR43889	FBgn0264481	FBgn0264481	asRNA:CR43889
CG15539	FBgn0039782	FBgn0039782	CG15539
CG5001	FBgn0031322	FBgn0031322	CG5001
CG1078	FBgn0037255	FBgn0037255	Fip1
CR45577	FBgn0267137	FBgn0267137	lncRNA:CR45577
CG6958	FBgn0039004	FBgn0039004	Nup133
CG6958	FBgn0085962	FBgn0085962	Dsim\Nup133
CG14789	FBgn0027791	FBgn0027791	O-fut2
CG12918	FBgn0263260	FBgn0263260	sel
CG33296	FBgn0053296	FBgn0053296	CG33296
CG4702	FBgn0037992	FBgn0037992	CG4702
CG17592	FBgn0029711	FBgn0029711	Usf
CG32591	FBgn0052591	FBgn0052591	CG32591
CG7872	FBgn0030658	FBgn0030658	CG7872
CG6760	FBgn0013563	FBgn0013563	Pex1
CG5996	FBgn0032593	FBgn0032593	Trpgamma
CG14782	FBgn0025381	FBgn0025381	rush
CG10793	FBgn0029656	FBgn0029656	CG10793
CG32068	FBgn0052068	FBgn0052068	Adi1
CG8988	FBgn0033656	FBgn0033656	S2P
CG43191	FBgn0262820	FBgn0262820	CG43191
CR44024	FBgn0264794	FBgn0264794	lncRNA:CR44024
CG5674	FBgn0032656	FBgn0032656	CG5674
CG1697	FBgn0030318	FBgn0030318	rho-4
CG42596	FBgn0260995	FBgn0260995	dpr21
CG15191	FBgn0000618	FBgn0000618	e(y)2
CR44151	FBgn0265000	FBgn0265000	lncRNA:CR44151
CG5022	FBgn0032225	FBgn0032225	CG5022
CG14933	FBgn0040968	FBgn0040968	CG14933
CR44785	FBgn0266020	FBgn0266020	lncRNA:CR44785
CG14026	FBgn0003716	FBgn0003716	tkv
CR45851	FBgn0267511	FBgn0267511	28SrRNA-Psi:CR45851
CG15719	FBgn0030440	FBgn0030440	CG15719
CG34127	FBgn0083963	FBgn0083963	Nlg3
CG12630	FBgn0028979	FBgn0028979	tio
CG17956	FBgn0002862	FBgn0002862	Mst87F
CG10842	FBgn0015037	FBgn0015037	Cyp4p1
CG11839	FBgn0039271	FBgn0039271	CG11839
CG10363	FBgn0041180	FBgn0041180	Tep4
CG4897	FBgn0005593	FBgn0005593	RpL7
CG4909	FBgn0040294	FBgn0040294	POSH
CG31705	FBgn0028490	FBgn0028490	CG31705
CG10823	FBgn0038880	FBgn0038880	SIFaR
CG6822	FBgn0035909	FBgn0035909	ergic53
CG3540	FBgn0023541	FBgn0023541	Cyp4d14
CG43646	FBgn0263655	FBgn0263655	CG43646
CG42358	FBgn0259704	FBgn0259704	Nsun5
CG4842	FBgn0036620	FBgn0036620	CG4842
CG13475	FBgn0040318	FBgn0040318	HGTX
CG6983	FBgn0035896	FBgn0035896	CG6983
CG42361	FBgn0259707	FBgn0259707	CG42361
CG1663	FBgn0033449	FBgn0033449	CG1663
CG32006	FBgn0052006	FBgn0052006	CG32006
CG2163	FBgn0005648	FBgn0005648	Pabp2
CG9619	FBgn0036862	FBgn0036862	Gbs-76A
CG9335	FBgn0032895	FBgn0032895	twit
CG5261	FBgn0283658	FBgn0283658	muc
CG1515	FBgn0260858	FBgn0260858	Ykt6
CG1552	FBgn0030258	FBgn0030258	CG1552
CG1964	FBgn0039688	FBgn0039688	Kul
CG33522	FBgn0261872	FBgn0261872	scaf6
CG18420	FBgn0028866	FBgn0028866	CG18420
CG34219	FBgn0085248	FBgn0085248	CG34219
CG11438	FBgn0037164	FBgn0037164	CG11438
CG5202	FBgn0032391	FBgn0032391	escl
CG5337	FBgn0032249	FBgn0032249	TBC1D16
CG44102	FBgn0264911	FBgn0264911	CG44102
CG6642	FBgn0011293	FBgn0011293	a10
CG46280	FBgn0283438	FBgn0283438	CG46280
CG30479	FBgn0050479	FBgn0050479	CG30479
CR31451	FBgn0051451	FBgn0051451	lncRNA:CR31451
CG13749	FBgn0033353	FBgn0033353	CG13749
CG8483	FBgn0038126	FBgn0038126	CG8483
CG15077	FBgn0034387	FBgn0034387	Cyp12b2
CG18787	FBgn0042125	FBgn0042125	CG18787
CG10863	FBgn0027552	FBgn0027552	CG10863
CG3845	FBgn0010488	FBgn0010488	NAT1
CG11420	FBgn0000826	FBgn0000826	png
CG17331	FBgn0032596	FBgn0032596	Prosbeta4
CG12348	FBgn0003380	FBgn0003380	Sh
CG7590	FBgn0041094	FBgn0041094	scyl
CG17002	FBgn0033122	FBgn0033122	CG17002
CG12396	FBgn0022069	FBgn0022069	Nnp-1
CG4618	FBgn0035589	FBgn0035589	CHMP2B
CG2239	FBgn0027654	FBgn0027654	jdp
CG3288	FBgn0037030	FBgn0037030	CG3288
CG1674	FBgn0039897	FBgn0039897	CG1674
CG6689	FBgn0037877	FBgn0037877	CG6689
CG1795	FBgn0027864	FBgn0027864	Ogg1
CG5671	FBgn0026379	FBgn0026379	Pten
CG6639	FBgn0032638	FBgn0032638	SPH93
CG12051	FBgn0000043	FBgn0000043	Act42A
CG6671	FBgn0262739	FBgn0262739	AGO1
CG1343	FBgn0020378	FBgn0020378	Sp1
CG13603	FBgn0039135	FBgn0039135	CG13603
CG32055	FBgn0052055	FBgn0052055	CG32055
CG2412	FBgn0033389	FBgn0033389	Rad51D
CR32730	FBgn0047092	FBgn0047092	lncRNA:CR32730
CG11100	FBgn0037207	FBgn0037207	Mes2
CG33230	FBgn0053230	FBgn0053230	CG33230
CG17320	FBgn0015808	FBgn0015808	ScpX
CG33162	FBgn0011509	FBgn0011509	SrpRbeta
CG1263	FBgn0261602	FBgn0261602	RpL8
CG6222	FBgn0003575	FBgn0003575	su(sable)
CG14672	FBgn0044823	FBgn0044823	Spec2
CG32139	FBgn0042630	FBgn0042630	Sox21b
CG11025	FBgn0028372	FBgn0028372	isopeptidase-T-3
CG15871	FBgn0030552	FBgn0030552	mRpL38
CG3949	FBgn0286786	FBgn0286786	hoip
CG6992	FBgn0004620	FBgn0004620	GluRIIA
CG11092	FBgn0027537	FBgn0027537	Nup93-1
CG31300	FBgn0051300	FBgn0051300	CG31300
CG6525	FBgn0082831	FBgn0082831	pps
CG3057	FBgn0019830	FBgn0019830	colt
CG6680	FBgn0262057	FBgn0262057	Spn77Ba
CG12698	FBgn0030721	FBgn0030721	CG12698
CG5893	FBgn0000411	FBgn0000411	D
CG9999	FBgn0003346	FBgn0003346	RanGAP
CR45144	FBgn0266637	FBgn0266637	asRNA:CR45144
CG18598	FBgn0038589	FBgn0038589	CG18598
CG6988	FBgn0286818	FBgn0286818	Pdi
CG43155	FBgn0262685	FBgn0262685	CG43155
CR43259	FBgn0262904	FBgn0262904	asRNA:CR43259
CG14137	FBgn0036178	FBgn0036178	CG14137
CG32507	FBgn0052507	FBgn0052507	CG32507
CG5125	FBgn0002938	FBgn0002938	ninaC
CG8770	FBgn0004623	FBgn0004623	Gbeta76C
CG43225	FBgn0262870	FBgn0262870	axo
CG6906	FBgn0027843	FBgn0027843	CAH2
CG12665	FBgn0030103	FBgn0030103	Obp8a
CG3127	FBgn0250906	FBgn0250906	Pgk
CG3688	FBgn0286027	FBgn0286027	Rnmt
CG44838	FBgn0266101	FBgn0266101	CG44838
CG31439	FBgn0051439	FBgn0051439	Muc96D
CG1765	FBgn0000546	FBgn0000546	EcR
CG14916	FBgn0041246	FBgn0041246	Gr32a
CG14104	FBgn0040786	FBgn0040786	CG14104
CG13502	FBgn0034692	FBgn0034692	CG13502
CG13229	FBgn0033579	FBgn0033579	CG13229
CG33213	FBgn0053213	FBgn0053213	CG33213
CG44159	FBgn0265042	FBgn0265042	Irk1
CG10889	FBgn0038769	FBgn0038769	CG10889
CG17759	FBgn0004435	FBgn0004435	Galphaq
CG6550	FBgn0034214	FBgn0034214	CG6550
CG6426	FBgn0034162	FBgn0034162	CG6426
CG11835	FBgn0031264	FBgn0031264	CG11835
CR45209	FBgn0266736	FBgn0266736	asRNA:CR45209
CG33096	FBgn0053096	FBgn0053096	CG33096
CG5393	FBgn0015903	FBgn0015903	apt
CG8878	FBgn0027504	FBgn0027504	CG8878
CG3358	FBgn0033117	FBgn0033117	CG3358
CG12006	FBgn0035464	FBgn0035464	PIG-B
CG6057	FBgn0040283	FBgn0040283	SMC1
CG8890	FBgn0031661	FBgn0031661	Gmd
CG4274	FBgn0001086	FBgn0001086	fzy
CG13142	FBgn0032251	FBgn0032251	Nse4
CG1632	FBgn0030027	FBgn0030027	CG1632
CG15362	FBgn0031378	FBgn0031378	CG15362
CG9172	FBgn0030718	FBgn0030718	ND-20
CG9172	FBgn0081578	FBgn0081578	Dpse\GA21592
CG15475	FBgn0032867	FBgn0032867	CG15475
CG5354	FBgn0005683	FBgn0005683	pie
CG2555	FBgn0030398	FBgn0030398	Cpr11B
CG12181	FBgn0003374	FBgn0003374	Sgs4
CG32432	FBgn0052432	FBgn0052432	CG32432
CG12299	FBgn0032295	FBgn0032295	CG12299
CG17090	FBgn0035142	FBgn0035142	Hipk
CG1577	FBgn0033208	FBgn0033208	mRpL52
CG18468	FBgn0034217	FBgn0034217	Lhr
CG18468	FBgn0263272	FBgn0263272	Dsim\Lhr
CG18468	FBgn0074971	FBgn0074971	Dpse\Lhr
CG9008	FBgn0028540	FBgn0028540	CG9008
CG4536	FBgn0086693	FBgn0086693	iav
CG13322	FBgn0033784	FBgn0033784	SCCRO3
CG31122	FBgn0051122	FBgn0051122	CG31122
CR44943	FBgn0266248	FBgn0266248	lncRNA:CR44943
CG10639	FBgn0032729	FBgn0032729	L2HGDH
CG9231	FBgn0036887	FBgn0036887	CG9231
CG3228	FBgn0001330	FBgn0001330	kz
CG14456	FBgn0037176	FBgn0037176	CG14456
CG6628	FBgn0036072	FBgn0036072	CG6628
CG5166	FBgn0041188	FBgn0041188	Atx2
CG1683	FBgn0025111	FBgn0025111	Ant2
CG4414	FBgn0040091	FBgn0040091	Ugt317A1
CG13633	FBgn0015591	FBgn0015591	AstA
CG4006	FBgn0010379	FBgn0010379	Akt1
CG10724	FBgn0260049	FBgn0260049	flr
CG18321	FBgn0029002	FBgn0029002	miple2
CG31051	FBgn0051051	FBgn0051051	CG31051
CG43758	FBgn0264089	FBgn0264089	sli
CG5811	FBgn0004842	FBgn0004842	RYa-R
CG32625	FBgn0052625	FBgn0052625	CG32625
CG15601	FBgn0030673	FBgn0030673	CG15601
CG4552	FBgn0031304	FBgn0031304	CG4552
CR45312	FBgn0266851	FBgn0266851	lncRNA:CR45312
CG1506	FBgn0023416	FBgn0023416	Ac3
CR45954	FBgn0267616	FBgn0267616	lncRNA:CR45954
CG3303	FBgn0038381	FBgn0038381	EndoU
CG4629	FBgn0031299	FBgn0031299	CG4629
CG4463	FBgn0001224	FBgn0001224	Hsp23
CG30007	FBgn0285892	FBgn0285892	tea
CG32536	FBgn0052536	FBgn0052536	CG32536
CG5688	FBgn0026432	FBgn0026432	Grip163
CG45058	FBgn0266418	FBgn0266418	wake
CG6044	FBgn0034725	FBgn0034725	CG6044
CG16772	FBgn0032835	FBgn0032835	CG16772
CG7728	FBgn0036686	FBgn0036686	CG7728
CG9000	FBgn0034176	FBgn0034176	ste24a
CG6702	FBgn0004580	FBgn0004580	Cbp53E
CG3740	FBgn0023530	FBgn0023530	CG3740
CR44423	FBgn0265596	FBgn0265596	lncRNA:CR44423
CG4703	FBgn0038742	FBgn0038742	Arc42
CG4221	FBgn0038385	FBgn0038385	Fbxl7
CG17082	FBgn0039994	FBgn0039994	conu
CG9799	FBgn0038146	FBgn0038146	CG9799
CG15459	FBgn0031108	FBgn0031108	CG15459
CG6410	FBgn0034265	FBgn0034265	Snx16
CG41378	FBgn0085638	FBgn0085638	CG41378
CG6514	FBgn0031692	FBgn0031692	TpnC25D
CG7376	FBgn0035689	FBgn0035689	CG7376
CR45736	FBgn0267300	FBgn0267300	lncRNA:CR45736
CR44544	FBgn0265737	FBgn0265737	lncRNA:CR44544
CG9730	FBgn0036853	FBgn0036853	mRpL21
CG18815	FBgn0042138	FBgn0042138	CG18815
CG7806	FBgn0032018	FBgn0032018	CG7806
CG17292	FBgn0032029	FBgn0032029	CG17292
CG11875	FBgn0039301	FBgn0039301	Nup37
CG31915	FBgn0051915	FBgn0051915	CG31915
CR44115	FBgn0264946	FBgn0264946	asRNA:CR44115
CR44023	FBgn0264793	FBgn0264793	lncRNA:CR44023
CG17374	FBgn0287184	FBgn0287184	FASN3
CG9272	FBgn0032907	FBgn0032907	CG9272
CG6755	FBgn0039066	FBgn0039066	EloA
CG9441	FBgn0003162	FBgn0003162	Pu
CG6847	FBgn0030884	FBgn0030884	CG6847
CG31948	FBgn0051948	FBgn0051948	CG31948
CG31288	FBgn0051288	FBgn0051288	CG31288
CG13843	FBgn0038993	FBgn0038993	CG13843
CG7354	FBgn0036774	FBgn0036774	mRpS26
CG34310	FBgn0085339	FBgn0085339	CG34310
CG32300	FBgn0015360	FBgn0015360	oxt
CG5567	FBgn0036760	FBgn0036760	CG5567
CG41624	FBgn0086917	FBgn0086917	spok
CG8340	FBgn0010339	FBgn0010339	128up
CG5655	FBgn0011305	FBgn0011305	Rsf1
CG12290	FBgn0039419	FBgn0039419	CG12290
CG14999	FBgn0260985	FBgn0260985	RfC4
CG32500	FBgn0285970	FBgn0285970	CG32500
CG8532	FBgn0028582	FBgn0028582	lqf
CG33200	FBgn0053200	FBgn0053200	VepD
CG42533	FBgn0260486	FBgn0260486	Ziz
CG5147	FBgn0036775	FBgn0036775	RpIIIC53
CG10338	FBgn0032700	FBgn0032700	CG10338
CG17878	FBgn0261386	FBgn0261386	Gpa2
CG6653	FBgn0040255	FBgn0040255	Ugt35E2
CG43077	FBgn0262487	FBgn0262487	CG43077
CG14031	FBgn0031695	FBgn0031695	Cyp4ac3
CG9310	FBgn0004914	FBgn0004914	Hnf4
CG18531	FBgn0265139	FBgn0265139	Gr2a
CG14143	FBgn0036138	FBgn0036138	CG14143
CG2049	FBgn0020621	FBgn0020621	Pkn
CG11761	FBgn0033528	FBgn0033528	trsn
CG14803	FBgn0023513	FBgn0023513	CG14803
CG4740	FBgn0041579	FBgn0041579	AttC
CG43726	FBgn0263974	FBgn0263974	qin
CG9681	FBgn0043578	FBgn0043578	PGRP-SB1
CG8250	FBgn0040505	FBgn0040505	Alk
CG3815	FBgn0029861	FBgn0029861	CG3815
CG12708	FBgn0030666	FBgn0030666	CG12708
CG13398	FBgn0032042	FBgn0032042	CG13398
CG17737	FBgn0035423	FBgn0035423	eIF1
CG3140	FBgn0283494	FBgn0283494	Adk2
CG14480	FBgn0034242	FBgn0034242	CG14480
CG1747	FBgn0030300	FBgn0030300	Sk1
CG32225	FBgn0052225	FBgn0052225	CG32225
CG42610	FBgn0266084	FBgn0266084	Fhos
CG6179	FBgn0030915	FBgn0030915	CG6179
CG5180	FBgn0043457	FBgn0043457	CG5180
CG9366	FBgn0014380	FBgn0014380	RhoL
CR44054	FBgn0264863	FBgn0264863	asRNA:CR44054
CR45327	FBgn0266866	FBgn0266866	lncRNA:CR45327
CG7920	FBgn0039737	FBgn0039737	CG7920
CG7920	FBgn0068673	FBgn0068673	Dsim\GD17454
CG3983	FBgn0038473	FBgn0038473	Ns1
CG3416	FBgn0002787	FBgn0002787	Rpn8
CG32695	FBgn0052695	FBgn0052695	CG32695
CG32076	FBgn0052076	FBgn0052076	Alg10
CG44425	FBgn0265598	FBgn0265598	Bx
CG10341	FBgn0032701	FBgn0032701	CG10341
CG5705	FBgn0032486	FBgn0032486	mRF1
CG46121	FBgn0267796	FBgn0267796	Tmc
CG6948	FBgn0024814	FBgn0024814	Clc
CR44320	FBgn0265379	FBgn0265379	lncRNA:CR44320
CG11722	FBgn0037777	FBgn0037777	CG11722
CG2040	FBgn0010114	FBgn0010114	hig
CG2969	FBgn0020762	FBgn0020762	Atet
CG31012	FBgn0027598	FBgn0027598	cindr
CG44774	FBgn0266000	FBgn0266000	CG44774
CG4792	FBgn0039016	FBgn0039016	Dcr-1
CG4792	FBgn0084784	FBgn0084784	Dsim\Dcr-1
CG7528	FBgn0029113	FBgn0029113	Uba2
CG17840	FBgn0031611	FBgn0031611	FIG4
CR46096	FBgn0267765	FBgn0267765	asRNA:CR46096
CG4408	FBgn0039073	FBgn0039073	CG4408
CG18616	FBgn0260444	FBgn0260444	Not10
CG4455	FBgn0028506	FBgn0028506	CG4455
CG31388	FBgn0051388	FBgn0051388	CG31388
CG8264	FBgn0004856	FBgn0004856	Bx42
CG1827	FBgn0033431	FBgn0033431	CG1827
CG8479	FBgn0261276	FBgn0261276	Opa1
CG9518	FBgn0030590	FBgn0030590	CG9518
CG14636	FBgn0037217	FBgn0037217	CG14636
CG11084	FBgn0003090	FBgn0003090	pk
CG5267	FBgn0034154	FBgn0034154	CG5267
CG9353	FBgn0034579	FBgn0034579	mRpL54
CG4751	FBgn0032348	FBgn0032348	CG4751
CG8782	FBgn0022774	FBgn0022774	Oat
CG44880	FBgn0266174	FBgn0266174	pre-mod(mdg4)-L
CG5110	FBgn0032642	FBgn0032642	CG5110
CG1220	FBgn0063923	FBgn0063923	Kaz1-ORFB
CG8825	FBgn0260817	FBgn0260817	gkt
CG16812	FBgn0032488	FBgn0032488	CG16812
CG42561	FBgn0260763	FBgn0260763	CG42561
CG10407	FBgn0038395	FBgn0038395	CG10407
CG13663	FBgn0039291	FBgn0039291	CG13663
CR44228	FBgn0265159	FBgn0265159	asRNA:CR44228
CG7664	FBgn0001994	FBgn0001994	crp
CG12068	FBgn0262112	FBgn0262112	sro
CR44911	FBgn0266216	FBgn0266216	asRNA:CR44911
CG5576	FBgn0013983	FBgn0013983	imd
CG34354	FBgn0085383	FBgn0085383	CG34354
CG2087	FBgn0037327	FBgn0037327	PEK
CG13608	FBgn0039159	FBgn0039159	mRpS24
CG15649	FBgn0034563	FBgn0034563	CG15649
CG14669	FBgn0037326	FBgn0037326	CG14669
CG10447	FBgn0032816	FBgn0032816	Nf-YB
CG10495	FBgn0032750	FBgn0032750	CG10495
CR43301	FBgn0262993	FBgn0262993	lncRNA:CR43301
CG8569	FBgn0033752	FBgn0033752	CG8569
CG10951	FBgn0045980	FBgn0045980	niki
CG8159	FBgn0037619	FBgn0037619	CG8159
CG4816	FBgn0022987	FBgn0022987	qkr54B
CG18304	FBgn0031869	FBgn0031869	CG18304
CG5028	FBgn0039358	FBgn0039358	CG5028
CG31217	FBgn0051217	FBgn0051217	modSP
CG31217	FBgn0067469	FBgn0067469	Dvir\GJ23926
CG16892	FBgn0030122	FBgn0030122	Aladin
CG1451	FBgn0015589	FBgn0015589	Apc
CG10328	FBgn0015520	FBgn0015520	nonA-l
CG3097	FBgn0029804	FBgn0029804	CG3097
CG34124	FBgn0083960	FBgn0083960	CG34124
CG7770	FBgn0036918	FBgn0036918	Pfdn6
CG6579	FBgn0032422	FBgn0032422	atilla
CG6604	FBgn0016660	FBgn0016660	H15
CG6977	FBgn0037963	FBgn0037963	Cad87A
CG18069	FBgn0264607	FBgn0264607	CaMKII
CG3048	FBgn0026319	FBgn0026319	Traf4
CG33979	FBgn0261458	FBgn0261458	capt
CG13743	FBgn0033368	FBgn0033368	CG13743
CG31802	FBgn0051802	FBgn0051802	CG31802
CG13795	FBgn0031937	FBgn0031937	CG13795
CR44727	FBgn0265940	FBgn0265940	lncRNA:CR44727
CG5104	FBgn0037009	FBgn0037009	CG5104
CG31381	FBgn0043799	FBgn0043799	CG31381
CG4195	FBgn0002283	FBgn0002283	l(3)73Ah
CG9346	FBgn0034572	FBgn0034572	CG9346
CG8922	FBgn0002590	FBgn0002590	RpS5a
CG6113	FBgn0032264	FBgn0032264	Lip4
CG4977	FBgn0015400	FBgn0015400	kek2
CG4977	FBgn0085048	FBgn0085048	Dsim\GD23783
CG10236	FBgn0002526	FBgn0002526	LanA
CG7883	FBgn0039726	FBgn0039726	eIF2Balpha
CG2863	FBgn0021874	FBgn0021874	Nle
CG16935	FBgn0033883	FBgn0033883	CG16935
CG30026	FBgn0050026	FBgn0050026	CG30026
CG6415	FBgn0032287	FBgn0032287	CG6415
CG1360	FBgn0033195	FBgn0033195	CG1360
CG3620	FBgn0262738	FBgn0262738	norpA
CG9495	FBgn0003334	FBgn0003334	Scm
CG13901	FBgn0035164	FBgn0035164	CG13901
CG11808	FBgn0034000	FBgn0034000	CG11808
CG7251	FBgn0031723	FBgn0031723	CG7251
CG4663	FBgn0033812	FBgn0033812	Pex13
CG9298	FBgn0260861	FBgn0260861	Trs23
CG10286	FBgn0037439	FBgn0037439	CG10286
CG8503	FBgn0033917	FBgn0033917	SmydA-1
CR34607	FBgn0082961	FBgn0082961	snoRNA:Psi28S-3385b
CR44514	FBgn0265707	FBgn0265707	lncRNA:CR44514
CG8257	FBgn0033900	FBgn0033900	CysRS-m
CR43951	FBgn0264602	FBgn0264602	lncRNA:CR43951
CG32486	FBgn0266918	FBgn0266918	CG32486
CR45556	FBgn0267116	FBgn0267116	lncRNA:CR45556
CG7908	FBgn0039734	FBgn0039734	Tace
CG43946	FBgn0264574	FBgn0264574	Glut1
CG12715	FBgn0030443	FBgn0030443	CG12715
CG9813	FBgn0038143	FBgn0038143	CG9813
CG32512	FBgn0052512	FBgn0052512	CG32512
CG9363	FBgn0037697	FBgn0037697	GstZ2
CG13531	FBgn0034786	FBgn0034786	CG13531
CG43955	FBgn0264606	FBgn0264606	Fife
CG5757	FBgn0034299	FBgn0034299	CG5757
CG10396	FBgn0033020	FBgn0033020	COX4L
CG15247	FBgn0030156	FBgn0030156	CG15247
CG8586	FBgn0033320	FBgn0033320	CG8586
CG5322	FBgn0032253	FBgn0032253	LManI
CR44897	FBgn0266202	FBgn0266202	asRNA:CR44897
CG14750	FBgn0022027	FBgn0022027	Vps25
CG32813	FBgn0052813	FBgn0052813	CG32813
CG5524	FBgn0266282	FBgn0266282	jnj
CG8547	FBgn0033919	FBgn0033919	CG8547
CG14745	FBgn0043575	FBgn0043575	PGRP-SC2
CG42541	FBgn0260658	FBgn0260658	CG42541
CG7956	FBgn0038890	FBgn0038890	CG7956
CG31460	FBgn0051460	FBgn0051460	CG31460
CG14431	FBgn0029922	FBgn0029922	CG14431
CG9238	FBgn0036428	FBgn0036428	Gbs-70E
CG5964	FBgn0036206	FBgn0036206	CG5964
CG5106	FBgn0037879	FBgn0037879	scpr-C
CG2715	FBgn0024980	FBgn0024980	Syx4
CG42855	FBgn0262102	FBgn0262102	CG42855
CG7228	FBgn0031969	FBgn0031969	pes
CG12787	FBgn0041150	FBgn0041150	hoe1
CG4645	FBgn0030435	FBgn0030435	CG4645
CG31298	FBgn0038092	FBgn0038092	beat-Vb
CG31875	FBgn0051875	FBgn0051875	CG31875
CG34404	FBgn0085433	FBgn0085433	CG34404
CG34214	FBgn0085243	FBgn0085243	CG34214
CG9709	FBgn0034629	FBgn0034629	Acox57D-d
CG8490	FBgn0033715	FBgn0033715	CG8490
CG34109	FBgn0083945	FBgn0083945	CG34109
CG14724	FBgn0019624	FBgn0019624	COX5A
CG14724	FBgn0073243	FBgn0073243	Dpse\GA13206
CG42803	FBgn0264495	FBgn0264495	gpp
CG9629	FBgn0036857	FBgn0036857	Aldh7A1
CG3433	FBgn0021944	FBgn0021944	Coprox
CG13204	FBgn0033627	FBgn0033627	CG13204
CG8032	FBgn0037606	FBgn0037606	CG8032
CG6189	FBgn0001341	FBgn0001341	Mybbp1A
CG9451	FBgn0036876	FBgn0036876	CG9451
CG34445	FBgn0085474	FBgn0085474	CG34445
CG7371	FBgn0031710	FBgn0031710	Vps52
CG17612	FBgn0031597	FBgn0031597	CG17612
CG3395	FBgn0010408	FBgn0010408	RpS9
CG4096	FBgn0029791	FBgn0029791	AdamTS-B
CG14957	FBgn0035412	FBgn0035412	CG14957
CG15525	FBgn0039732	FBgn0039732	CG15525
CG12749	FBgn0004237	FBgn0004237	Hrb87F
CG14696	FBgn0037853	FBgn0037853	CG14696
CG14696	FBgn0093193	FBgn0093193	Dana\GF16171
CR45262	FBgn0266800	FBgn0266800	lncRNA:CR45262
CG13011	FBgn0261245	FBgn0261245	sing
CG5373	FBgn0015277	FBgn0015277	Pi3K59F
CR32989	FBgn0041717	FBgn0041717	snRNA:U6atac
CG34180	FBgn0085209	FBgn0085209	CG34180
CG31678	FBgn0051678	FBgn0051678	CG31678
CG2849	FBgn0015286	FBgn0015286	Rala
CG3861	FBgn0261955	FBgn0261955	kdn
CG10801	FBgn0029660	FBgn0029660	CG10801
CG4438	FBgn0032115	FBgn0032115	CG4438
CR43596	FBgn0263481	FBgn0263481	snoRNA:lola-b
CG34100	FBgn0263490	FBgn0263490	mld
CG6920	FBgn0002906	FBgn0002906	Blm
CG4918	FBgn0003274	FBgn0003274	RpLP2
CG18271	FBgn0037263	FBgn0037263	slx1
CR44042	FBgn0264834	FBgn0264834	lncRNA:CR44042
CG5170	FBgn0027835	FBgn0027835	Dp1
CG43161	FBgn0262717	FBgn0262717	Skeletor
CG1232	FBgn0003710	FBgn0003710	tipE
CG16734	FBgn0037667	FBgn0037667	CG16734
CG7580	FBgn0036728	FBgn0036728	UQCR-Q
CG7580	FBgn0080448	FBgn0080448	Dpse\GA20453
CR34612	FBgn0082988	FBgn0082988	snoRNA:Psi28S-2442b
CG9120	FBgn0004431	FBgn0004431	LysX
CR44738	FBgn0265951	FBgn0265951	lncRNA:CR44738
CG17163	FBgn0039942	FBgn0039942	CG17163
CG32533	FBgn0052533	FBgn0052533	CG32533
CG8808	FBgn0017558	FBgn0017558	Pdk
CG13126	FBgn0032168	FBgn0032168	CG13126
CR45030	FBgn0266390	FBgn0266390	lncRNA:CR45030
CG5454	FBgn0261792	FBgn0261792	snRNP-U1-C
CG7221	FBgn0031972	FBgn0031972	Wwox
CG12118	FBgn0030101	FBgn0030101	CG12118
CG4027	FBgn0000042	FBgn0000042	Act5C
CR45921	FBgn0267581	FBgn0267581	lncRNA:CR45921
CG13995	FBgn0031770	FBgn0031770	CG13995
CG12169	FBgn0035143	FBgn0035143	Ppm1
CR44351	FBgn0265451	FBgn0265451	asRNA:CR44351
CG7865	FBgn0033050	FBgn0033050	Pngl
CG43226	FBgn0262871	FBgn0262871	lute
CG9291	FBgn0266711	FBgn0266711	EloC
CG1548	FBgn0029093	FBgn0029093	cathD
CG12825	FBgn0033221	FBgn0033221	CG12825
CG31635	FBgn0051635	FBgn0051635	CG31635
CG31111	FBgn0051111	FBgn0051111	CG31111
CG10755	FBgn0015036	FBgn0015036	Cyp4ae1
CG12992	FBgn0030846	FBgn0030846	CG12992
CG32397	FBgn0263973	FBgn0263973	jv
CG13360	FBgn0025620	FBgn0025620	CG13360
CG14410	FBgn0030583	FBgn0030583	CG14410
CG12092	FBgn0261675	FBgn0261675	Npc1b
CG13931	FBgn0035258	FBgn0035258	CG13931
CG8327	FBgn0037723	FBgn0037723	SpdS
CG8327	FBgn0080979	FBgn0080979	Dpse\GA20990
CG2151	FBgn0020653	FBgn0020653	Trxr-1
CR44083	FBgn0264892	FBgn0264892	asRNA:CR44083
CG13934	FBgn0035279	FBgn0035279	Cpr62Ba
CG5537	FBgn0035639	FBgn0035639	kri
CG8863	FBgn0038145	FBgn0038145	Droj2
CG12090	FBgn0035227	FBgn0035227	Iml1
CG12090	FBgn0053971	FBgn0053971	Ir62a
CG1799	FBgn0003204	FBgn0003204	ras
CG5913	FBgn0039385	FBgn0039385	CG5913
CG1291	FBgn0035401	FBgn0035401	Alg2
CG31262	FBgn0051262	FBgn0051262	CG31262
CG42707	FBgn0261624	FBgn0261624	I-3
CG1616	FBgn0015929	FBgn0015929	dpa
CG14224	FBgn0031057	FBgn0031057	Ubqn
CG7509	FBgn0035575	FBgn0035575	CG7509
CG7693	FBgn0023083	FBgn0023083	fray
CG8470	FBgn0030692	FBgn0030692	mRpS30
CG1489	FBgn0020369	FBgn0020369	Rpt6
CG13784	FBgn0031897	FBgn0031897	CG13784
CG7283	FBgn0036213	FBgn0036213	RpL10Ab
CG2611	FBgn0032871	FBgn0032871	CG2611
CR44382	FBgn0265532	FBgn0265532	asRNA:CR44382
CG8801	FBgn0028473	FBgn0028473	Non1
CG42714	FBgn0261631	FBgn0261631	CG42714
CG8994	FBgn0000615	FBgn0000615	exu
CG6694	FBgn0035900	FBgn0035900	ZC3H3
CG8687	FBgn0033302	FBgn0033302	Cyp6a14
CG18048	FBgn0037435	FBgn0037435	CG18048
CR44186	FBgn0265075	FBgn0265075	lncRNA:CR44186
CG13437	FBgn0034541	FBgn0034541	CG13437
CG13437	FBgn0072333	FBgn0072333	Dpse\GA12287
CG18341	FBgn0029812	FBgn0029812	Prosbeta2R1
CR45687	FBgn0267247	FBgn0267247	lncRNA:CR45687
CG43772	FBgn0264272	FBgn0264272	mwh
CG5447	FBgn0039427	FBgn0039427	CG5447
CG6126	FBgn0038407	FBgn0038407	CG6126
CR44606	FBgn0265817	FBgn0265817	lncRNA:CR44606
CG17129	FBgn0035151	FBgn0035151	CG17129
CR44655	FBgn0265866	FBgn0265866	lncRNA:CR44655
CG45070	FBgn0266452	FBgn0266452	CTPsyn
CG13424	FBgn0034520	FBgn0034520	lms
CG12505	FBgn0033926	FBgn0033926	Arc1
CR43408	FBgn0263327	FBgn0263327	lncRNA:CR43408
CG6009	FBgn0015781	FBgn0015781	P5cr
CG11777	FBgn0033527	FBgn0033527	CG11777
CG15210	FBgn0040850	FBgn0040850	CG15210
CG12389	FBgn0025373	FBgn0025373	Fpps
CG10673	FBgn0035590	FBgn0035590	Prpk
CG31029	FBgn0051029	FBgn0051029	CG31029
CG2522	FBgn0010391	FBgn0010391	Gtp-bp
CG4797	FBgn0034909	FBgn0034909	CG4797
CG42267	FBgn0259162	FBgn0259162	RunxB
CG5505	FBgn0260936	FBgn0260936	scny
CG42312	FBgn0259212	FBgn0259212	cno
CG10206	FBgn0026196	FBgn0026196	nop5
CG10186	FBgn0032797	FBgn0032797	Hasp
CG2893	FBgn0265767	FBgn0265767	zyd
CG9537	FBgn0031820	FBgn0031820	Daxx
CG2331	FBgn0286784	FBgn0286784	TER94
CG10542	FBgn0086694	FBgn0086694	Bre1
CG33552	FBgn0053552	FBgn0053552	CG33552
CG8004	FBgn0036920	FBgn0036920	CG8004
CR44748	FBgn0265961	FBgn0265961	lncRNA:CR44748
CG34430	FBgn0085459	FBgn0085459	CG34430
CG14513	FBgn0005596	FBgn0005596	yem
CG6122	FBgn0004872	FBgn0004872	piwi
CG12252	FBgn0035026	FBgn0035026	Fcp1
CG12878	FBgn0045862	FBgn0045862	btz
CG12878	FBgn0071927	FBgn0071927	Dpse\GA11878
CG4548	FBgn0039338	FBgn0039338	XNP
CG1470	FBgn0013973	FBgn0013973	Gycbeta100B
CG3016	FBgn0029819	FBgn0029819	Usp30
CG7576	FBgn0005586	FBgn0005586	Rab3
CG30334	FBgn0050334	FBgn0050334	CG30334
CG42857	FBgn0262104	FBgn0262104	CG42857
CG1886	FBgn0030343	FBgn0030343	ATP7
CG12347	FBgn0038558	FBgn0038558	CG12347
CG10388	FBgn0003944	FBgn0003944	Ubx
CG34383	FBgn0085412	FBgn0085412	kmr
CG10033	FBgn0000721	FBgn0000721	for
CR44741	FBgn0265954	FBgn0265954	lncRNA:CR44741
CG11989	FBgn0263251	FBgn0263251	vnc
CG3924	FBgn0013764	FBgn0013764	Chi
CR43730	FBgn0263981	FBgn0263981	asRNA:CR43730
CG2104	FBgn0037365	FBgn0037365	CG2104
CG12218	FBgn0026206	FBgn0026206	mei-P26
CR43767	FBgn0264267	FBgn0264267	asRNA:CR43767
CR45414	FBgn0266963	FBgn0266963	lncRNA:CR45414
CR44996	FBgn0266331	FBgn0266331	asRNA:CR44996
CG9935	FBgn0039916	FBgn0039916	Ekar
CG10353	FBgn0030349	FBgn0030349	CG10353
CR45475	FBgn0267031	FBgn0267031	lncRNA:CR45475
CG1106	FBgn0010225	FBgn0010225	Gel
CG42340	FBgn0259242	FBgn0259242	CG42340
CG10939	FBgn0010620	FBgn0010620	CG10939
CG3744	FBgn0039240	FBgn0039240	CG3744
CG3223	FBgn0037538	FBgn0037538	CG3223
CG11579	FBgn0000117	FBgn0000117	arm
CG5853	FBgn0032167	FBgn0032167	CG5853
CG2984	FBgn0022768	FBgn0022768	Pp2C1
CG31176	FBgn0051176	FBgn0051176	CG31176
CG12892	FBgn0033526	FBgn0033526	Caf1-105
CG12134	FBgn0033471	FBgn0033471	CG12134
CG12134	FBgn0208400	FBgn0208400	Dvir\GJ21267
CG16710	FBgn0039101	FBgn0039101	CG16710
CG17494	FBgn0040011	FBgn0040011	Slmap
CG17494	FBgn0265239	FBgn0265239	Dpse\GA29082
CG8287	FBgn0262518	FBgn0262518	Rab8
CG34450	FBgn0085479	FBgn0085479	CG34450
CR43887	FBgn0264479	FBgn0264479	lncRNA:CR43887
CG8950	FBgn0034186	FBgn0034186	CG8950
CG31407	FBgn0051407	FBgn0051407	CG31407
CG1650	FBgn0015561	FBgn0015561	unpg
CG31687	FBgn0051687	FBgn0051687	CG31687
CG14979	FBgn0035468	FBgn0035468	Gr63a
CG13418	FBgn0038903	FBgn0038903	RpI12
CG13501	FBgn0034684	FBgn0034684	CG13501
CG43665	FBgn0263740	FBgn0263740	eIF2gamma
CG10194	FBgn0032790	FBgn0032790	CG10194
CG6856	FBgn0036819	FBgn0036819	Dysb
CG12030	FBgn0035147	FBgn0035147	Gale
CG5927	FBgn0030899	FBgn0030899	Hesr
CG9089	FBgn0030805	FBgn0030805	wus
CG30345	FBgn0050345	FBgn0050345	CG30345
CG10222	FBgn0036356	FBgn0036356	CG10222
CG33956	FBgn0001297	FBgn0001297	kay
CG1059	FBgn0087013	FBgn0087013	Karybeta3
CG7466	FBgn0031981	FBgn0031981	Megf8
CG34148	FBgn0083984	FBgn0083984	CG34148
CG33051	FBgn0053051	FBgn0053051	CG33051
CG6634	FBgn0261963	FBgn0261963	mid
CG3997	FBgn0023170	FBgn0023170	RpL39
CG3000	FBgn0262699	FBgn0262699	fzr
CG9320	FBgn0032882	FBgn0032882	Ns4
CG14548	FBgn0002733	FBgn0002733	E(spl)mbeta-HLH
CG14548	FBgn0082739	FBgn0082739	Dsim\HLHmbeta
CG4785	FBgn0031314	FBgn0031314	IntS14
CR46131	FBgn0267806	FBgn0267806	lncRNA:CR46131
CR43817	FBgn0264365	FBgn0264365	lncRNA:CR43817
CG3333	FBgn0259937	FBgn0259937	Nop60B
CG17486	FBgn0032997	FBgn0032997	CG17486
CG14815	FBgn0023516	FBgn0023516	Pex5
CG10343	FBgn0032703	FBgn0032703	CG10343
CG2698	FBgn0037536	FBgn0037536	CG2698
CG11414	FBgn0035024	FBgn0035024	CG11414
CG4082	FBgn0017577	FBgn0017577	Mcm5
CG10946	FBgn0029974	FBgn0029974	dpr14
CG7280	FBgn0030966	FBgn0030966	shop
CG43189	FBgn0262818	FBgn0262818	CG43189
CG3644	FBgn0000181	FBgn0000181	bic
CG5920	FBgn0004867	FBgn0004867	RpS2
CG6530	FBgn0028956	FBgn0028956	mthl3
CG15602	FBgn0030694	FBgn0030694	CG15602
CG8146	FBgn0030869	FBgn0030869	Socs16D
CR45225	FBgn0266752	FBgn0266752	lncRNA:CR45225
CG32368	FBgn0052368	FBgn0052368	CG32368
CR43900	FBgn0264501	FBgn0264501	lncRNA:CR43900
CG9915	FBgn0030738	FBgn0030738	CG9915
CG3822	FBgn0038837	FBgn0038837	KaiR1D
CG11755	FBgn0037611	FBgn0037611	CG11755
CG3407	FBgn0031573	FBgn0031573	CG3407
CG10107	FBgn0035713	FBgn0035713	velo
CG5791	FBgn0040582	FBgn0040582	Bom791
CG17109	FBgn0039051	FBgn0039051	CG17109
CG34303	FBgn0085332	FBgn0085332	CG34303
CG14780	FBgn0025383	FBgn0025383	CG14780
CG32350	FBgn0052350	FBgn0052350	Vps11
CG3217	FBgn0025676	FBgn0025676	CkIIalpha-i3
CG34455	FBgn0085484	FBgn0085484	Pdxk
CG13393	FBgn0263852	FBgn0263852	Dad1
CG5492	FBgn0036769	FBgn0036769	Tsp74F
CG10324	FBgn0038454	FBgn0038454	CG10324
CG4025	FBgn0025624	FBgn0025624	CG4025
CG4186	FBgn0040634	FBgn0040634	CG4186
CG18563	FBgn0032639	FBgn0032639	CG18563
CR44353	FBgn0265453	FBgn0265453	lncRNA:CR44353
CG8962	FBgn0025809	FBgn0025809	Paf-AHalpha
CG9056	FBgn0260938	FBgn0260938	tay
CG8511	FBgn0033730	FBgn0033730	Cpr49Ag
CG4057	FBgn0041582	FBgn0041582	tamo
CG10418	FBgn0036277	FBgn0036277	CG10418
CG14417	FBgn0040353	FBgn0040353	CG14417
CG12413	FBgn0039588	FBgn0039588	mIF2
CG44015	FBgn0264785	FBgn0264785	Hph
CG7622	FBgn0002579	FBgn0002579	RpL36
CG12026	FBgn0262624	FBgn0262624	Tmhs
CG11159	FBgn0034539	FBgn0034539	CG11159
CG11159	FBgn0070860	FBgn0070860	Dpse\GA10804
CG12075	FBgn0030065	FBgn0030065	CG12075
CR45126	FBgn0266619	FBgn0266619	asRNA:CR45126
CG10938	FBgn0016697	FBgn0016697	Prosalpha5
CG10367	FBgn0263782	FBgn0263782	Hmgcr
CG8454	FBgn0285911	FBgn0285911	Vps16A
CG3450	FBgn0022224	FBgn0022224	ubl
CG1738	FBgn0030291	FBgn0030291	CG1738
CG1738	FBgn0084877	FBgn0084877	Dsim\GD17014
CR34560	FBgn0083003	FBgn0083003	snoRNA:Psi28S-1175c
CG16761	FBgn0035344	FBgn0035344	Cyp4d20
CG10837	FBgn0020660	FBgn0020660	eIF4B
CR44771	FBgn0265996	FBgn0265996	lncRNA:CR44771
CG14342	FBgn0031324	FBgn0031324	CG14342
CG7018	FBgn0005658	FBgn0005658	Ets65A
CG6700	FBgn0032305	FBgn0032305	CG6700
CG10360	FBgn0003231	FBgn0003231	ref(2)P
CG5279	FBgn0014019	FBgn0014019	Rh5
CG11060	FBgn0033149	FBgn0033149	CG11060
CG17462	FBgn0039251	FBgn0039251	Trf4-2
CR44294	FBgn0265340	FBgn0265340	lncRNA:CR44294
CG2096	FBgn0000711	FBgn0000711	flw
CG8889	FBgn0259985	FBgn0259985	Mppe
CG2127	FBgn0033286	FBgn0033286	CG2127
CG4620	FBgn0004395	FBgn0004395	unk
CG2851	FBgn0010323	FBgn0010323	Gsc
CG6194	FBgn0038325	FBgn0038325	Atg4b
CG18208	FBgn0038653	FBgn0038653	Octalpha2R
CG2185	FBgn0037358	FBgn0037358	elm
CG3198	FBgn0029887	FBgn0029887	CG3198
CG8612	FBgn0028648	FBgn0028648	mRpL50
CG6180	FBgn0032453	FBgn0032453	CG6180
CG11516	FBgn0004369	FBgn0004369	Ptp99A
CG17228	FBgn0004595	FBgn0004595	pros
CG8374	FBgn0278604	FBgn0278604	dmt
CG3210	FBgn0026479	FBgn0026479	Drp1
CG7023	FBgn0039025	FBgn0039025	Usp12-46
CG9109	FBgn0031765	FBgn0031765	CG9109
CG8271	FBgn0033657	FBgn0033657	Sln
CG32809	FBgn0023531	FBgn0023531	CG32809
CG16901	FBgn0263396	FBgn0263396	sqd
CG1317	FBgn0035333	FBgn0035333	CG1317
CR45809	FBgn0267459	FBgn0267459	lncRNA:CR45809
CG8269	FBgn0021825	FBgn0021825	DCTN2-p50
CG8472	FBgn0000253	FBgn0000253	Cam
CG5946	FBgn0036211	FBgn0036211	CG5946
CR46351	FBgn0286031	FBgn0286031	lncRNA:CR46351
CR44431	FBgn0265613	FBgn0265613	asRNA:CR44431
CG5808	FBgn0027617	FBgn0027617	CG5808
CG13950	FBgn0031289	FBgn0031289	CG13950
CG9795	FBgn0037234	FBgn0037234	CG9795
CG10626	FBgn0035610	FBgn0035610	Lkr
CG14211	FBgn0031044	FBgn0031044	MKP-4
CG3560	FBgn0030733	FBgn0030733	UQCR-14
CG3560	FBgn0077530	FBgn0077530	Dpse\GA17519
CG1873	FBgn0000557	FBgn0000557	eEF1alpha2
CG18445	FBgn0033476	FBgn0033476	oys
CG13702	FBgn0036789	FBgn0036789	AstC-R2
CG18661	FBgn0040964	FBgn0040964	CG18661
CG12157	FBgn0016041	FBgn0016041	Tom40
CG8402	FBgn0005777	FBgn0005777	PpD3
CG7235	FBgn0031728	FBgn0031728	Hsp60C
CG5989	FBgn0017429	FBgn0017429	CG5989
CG5989	FBgn0044887	FBgn0044887	Dvir\GJ12311
CG43850	FBgn0264432	FBgn0264432	CG43850
CG13890	FBgn0035169	FBgn0035169	Dci
CG3351	FBgn0038234	FBgn0038234	mRpL11
CR44713	FBgn0265924	FBgn0265924	lncRNA:CR44713
CG13072	FBgn0036580	FBgn0036580	PDCD-5
CG33544	FBgn0053544	FBgn0053544	Vkor
CR44813	FBgn0266048	FBgn0266048	lncRNA:CR44813
CG33156	FBgn0053156	FBgn0053156	CG33156
CG5659	FBgn0017418	FBgn0017418	ari-1
CG4365	FBgn0037024	FBgn0037024	tzn
CG7260	FBgn0011723	FBgn0011723	byn
CG6104	FBgn0002592	FBgn0002592	E(spl)m2-BFM
CG12420	FBgn0037797	FBgn0037797	CG12420
CG6498	FBgn0267390	FBgn0267390	dop
CG9930	FBgn0008646	FBgn0008646	E5
CG4154	FBgn0038295	FBgn0038295	Gyc88E
CG13054	FBgn0036584	FBgn0036584	CG13054
CR45834	FBgn0267484	FBgn0267484	asRNA:CR45834
CG14904	FBgn0020907	FBgn0020907	Scp2
CG44385	FBgn0265535	FBgn0265535	CG44385
CG10175	FBgn0039084	FBgn0039084	CG10175
CG33494	FBgn0053494	FBgn0053494	CG33494
CR44332	FBgn0265420	FBgn0265420	lncRNA:CR44332
CG16986	FBgn0035356	FBgn0035356	CG16986
CG34342	FBgn0085371	FBgn0085371	CG34342
CG12325	FBgn0033557	FBgn0033557	CG12325
CG31145	FBgn0051145	FBgn0051145	CG31145
CG1841	FBgn0030330	FBgn0030330	Tango10
CG31806	FBgn0051806	FBgn0051806	CG31806
CG34376	FBgn0085405	FBgn0085405	CG34376
CG4496	FBgn0031894	FBgn0031894	CG4496
CG10253	FBgn0033983	FBgn0033983	ADPS
CG5193	FBgn0004915	FBgn0004915	TfIIB
CG14787	FBgn0027793	FBgn0027793	CG14787
CG13319	FBgn0033781	FBgn0033781	CG13319
CG32095	FBgn0052095	FBgn0052095	CG32095
CG2684	FBgn0002542	FBgn0002542	lds
CG10217	FBgn0039113	FBgn0039113	udt
CG4491	FBgn0005771	FBgn0005771	noc
CG42260	FBgn0259145	FBgn0259145	CG42260
CR45431	FBgn0266980	FBgn0266980	lncRNA:CR45431
CG2950	FBgn0031637	FBgn0031637	mxt
CR42746	FBgn0261709	FBgn0261709	lncRNA:CR42746
CG6208	FBgn0266721	FBgn0266721	gammaSnap2
CG18313	FBgn0030566	FBgn0030566	betaNACtes4
CG7192	FBgn0030894	FBgn0030894	Mvb12
CG15065	FBgn0040734	FBgn0040734	Bom065
CR44892	FBgn0266197	FBgn0266197	asRNA:CR44892
CG2045	FBgn0019929	FBgn0019929	Ser7
CG1322	FBgn0004606	FBgn0004606	zfh1
CG5596	FBgn0002772	FBgn0002772	Mlc1
CG33914	FBgn0053914	FBgn0053914	CG33914
CG7816	FBgn0039714	FBgn0039714	Zip99C
CG4303	FBgn0025463	FBgn0025463	Bap60
CG2807	FBgn0036314	FBgn0036314	Sf3a2
CG2807	FBgn0031266	FBgn0031266	Sf3b1
CG12191	FBgn0035170	FBgn0035170	dpr20
CG17256	FBgn0029970	FBgn0029970	Nek2
CG7927	FBgn0027549	FBgn0027549	Nulp1
CG12286	FBgn0001296	FBgn0001296	kar
CG18858	FBgn0042175	FBgn0042175	CG18858
CG7458	FBgn0037144	FBgn0037144	CG7458
CG9507	FBgn0031808	FBgn0031808	Nepl5
CR44138	FBgn0264987	FBgn0264987	lncRNA:CR44138
CG34110	FBgn0083946	FBgn0083946	lobo
CG3399	FBgn0000256	FBgn0000256	capu
CG9821	FBgn0286516	FBgn0286516	aqz
CG30169	FBgn0050169	FBgn0050169	Brca2
CG4288	FBgn0038799	FBgn0038799	MFS9
CG1560	FBgn0004657	FBgn0004657	mys
CG11921	FBgn0004897	FBgn0004897	fd96Ca
CG31710	FBgn0051710	FBgn0051710	CG31710
CG10658	FBgn0014000	FBgn0014000	Hf
CG10658	FBgn0083428	FBgn0083428	Dsim\Hf
CG3936	FBgn0004647	FBgn0004647	N
CG9723	FBgn0030768	FBgn0030768	CG9723
CG4170	FBgn0024183	FBgn0024183	vig
CG11152	FBgn0039937	FBgn0039937	fd102C
CG11152	FBgn0061243	FBgn0061243	Dsim\GD24370
CG13295	FBgn0035674	FBgn0035674	CG13295
CG33752	FBgn0053752	FBgn0053752	CG33752
CG3962	FBgn0038475	FBgn0038475	Keap1
CG8936	FBgn0065032	FBgn0065032	Arpc3B
CG7073	FBgn0038947	FBgn0038947	Sar1
CG2615	FBgn0086657	FBgn0086657	IKKepsilon
CG1943	FBgn0037468	FBgn0037468	CG1943
CG1957	FBgn0027873	FBgn0027873	Cpsf100
CG32163	FBgn0052163	FBgn0052163	CG32163
CG8195	FBgn0034032	FBgn0034032	CG8195
CR43256	FBgn0262901	FBgn0262901	lncRNA:CR43256
CG7264	FBgn0036214	FBgn0036214	CG7264
CG1374	FBgn0003866	FBgn0003866	tsh
CG8169	FBgn0011660	FBgn0011660	Pms2
CG5905	FBgn0029843	FBgn0029843	Nep1
CG42316	FBgn0259216	FBgn0259216	RhoGAP102A
CR43423	FBgn0263342	FBgn0263342	lncRNA:CR43423
CG18767	FBgn0042112	FBgn0042112	mRpL36
CG33635	FBgn0053635	FBgn0053635	CG33635
CG6611	FBgn0000451	FBgn0000451	ect
CR44831	FBgn0266094	FBgn0266094	lncRNA:CR44831
CG13565	FBgn0034935	FBgn0034935	Orcokinin
CG3991	FBgn0020370	FBgn0020370	TppII
CG16884	FBgn0028544	FBgn0028544	Vajk3
CG17652	FBgn0031361	FBgn0031361	CG17652
CG3347	FBgn0031513	FBgn0031513	CG3347
CG5722	FBgn0024320	FBgn0024320	Npc1a
CG9920	FBgn0038200	FBgn0038200	CG9920
CG10904	FBgn0034945	FBgn0034945	CG10904
CR44471	FBgn0265664	FBgn0265664	lncRNA:CR44471
CG9413	FBgn0030574	FBgn0030574	sbm
CR45628	FBgn0267188	FBgn0267188	lncRNA:CR45628
CR43809	FBgn0264353	FBgn0264353	asRNA:CR43809
CG33998	FBgn0053998	FBgn0053998	CG33998
CG8500	FBgn0037754	FBgn0037754	CG8500
CG42494	FBgn0260026	FBgn0260026	CG42494
CG18801	FBgn0041627	FBgn0041627	Ku80
CG7870	FBgn0261020	FBgn0261020	wol
CG42878	FBgn0262170	FBgn0262170	CG42878
CG18176	FBgn0036038	FBgn0036038	defl
CG9090	FBgn0034497	FBgn0034497	Mpcp1
CG9090	FBgn0082745	FBgn0082745	Dsim\GD25287
CG4482	FBgn0086711	FBgn0086711	mol
CR43635	FBgn0263626	FBgn0263626	lncRNA:CR43635
CR44103	FBgn0264912	FBgn0264912	lncRNA:CR44103
CG7062	FBgn0015793	FBgn0015793	Rab19
CG2656	FBgn0037478	FBgn0037478	CG2656
CG9883	FBgn0031435	FBgn0031435	Elba2
CG5284	FBgn0036566	FBgn0036566	ClC-c
CG33512	FBgn0053512	FBgn0053512	dpr4
CG16825	FBgn0032503	FBgn0032503	CG16825
CR44363	FBgn0265470	FBgn0265470	lncRNA:CR44363
CG13601	FBgn0039126	FBgn0039126	CG13601
CG6733	FBgn0039052	FBgn0039052	CG6733
CG18085	FBgn0003366	FBgn0003366	sev
CG1391	FBgn0003464	FBgn0003464	sol
CG10693	FBgn0003429	FBgn0003429	slo
CG14117	FBgn0036331	FBgn0036331	CG14117
CG8161	FBgn0014022	FBgn0014022	Rlb1
CG8161	FBgn0083426	FBgn0083426	Dsim\Rlb1
CG33991	FBgn0013718	FBgn0013718	nuf
CG9986	FBgn0039589	FBgn0039589	CG9986
CG3068	FBgn0000147	FBgn0000147	aurA
CG9522	FBgn0030587	FBgn0030587	CG9522
CG14528	FBgn0039611	FBgn0039611	Nepl18
CG4863	FBgn0020910	FBgn0020910	RpL3
CG12233	FBgn0027291	FBgn0027291	Idh3a
CG1893	FBgn0035390	FBgn0035390	scramb2
CG13698	FBgn0036773	FBgn0036773	CG13698
CG17780	FBgn0039197	FBgn0039197	CG17780
CG12162	FBgn0037329	FBgn0037329	POLDIP2
CG12763	FBgn0004240	FBgn0004240	DptA
CG11577	FBgn0036847	FBgn0036847	CNPYb
CG30443	FBgn0050443	FBgn0050443	Opbp
CG8749	FBgn0016978	FBgn0016978	snRNP-U1-70K
CR34093	FBgn0013698	FBgn0013698	mt:tRNA:Leu-TAG
CG32845	FBgn0052845	FBgn0052845	CG32845
CG9151	FBgn0000028	FBgn0000028	acj6
CG3738	FBgn0010314	FBgn0010314	Cks30A
CG14857	FBgn0038262	FBgn0038262	CG14857
CG3902	FBgn0036824	FBgn0036824	CG3902
CG13927	FBgn0035245	FBgn0035245	GC
CG11967	FBgn0037646	FBgn0037646	CAHbeta
CG5602	FBgn0262619	FBgn0262619	DNAlig1
CG1494	FBgn0031169	FBgn0031169	CG1494
CG10694	FBgn0039147	FBgn0039147	CG10694
CG40006	FBgn0058006	FBgn0058006	CG40006
CG11168	FBgn0039249	FBgn0039249	CG11168
CG8201	FBgn0260934	FBgn0260934	par-1
CG5087	FBgn0035953	FBgn0035953	CG5087
CG5773	FBgn0034290	FBgn0034290	CG5773
CG14438	FBgn0286831	FBgn0286831	sov
CG6833	FBgn0036405	FBgn0036405	CG6833
CG34041	FBgn0054041	FBgn0054041	CG34041
CG8740	FBgn0027585	FBgn0027585	CG8740
CG15087	FBgn0034380	FBgn0034380	Vps51
CG33466	FBgn0259878	FBgn0259878	Fs
CR44826	FBgn0266073	FBgn0266073	lncRNA:CR44826
CG7127	FBgn0266667	FBgn0266667	Exo70
CG2013	FBgn0004436	FBgn0004436	Ubc6
CG8738	FBgn0033321	FBgn0033321	CG8738
CG6567	FBgn0037842	FBgn0037842	CG6567
CG6406	FBgn0034269	FBgn0034269	Hyccin
CG31628	FBgn0000053	FBgn0000053	Gart
CG1848	FBgn0283712	FBgn0283712	LIMK1
CG44248	FBgn0265192	FBgn0265192	Snp
CR43581	FBgn0263466	FBgn0263466	snoRNA:lola-a
CG14853	FBgn0038246	FBgn0038246	CG14853
CG14965	FBgn0035414	FBgn0035414	CG14965
CR45457	FBgn0267013	FBgn0267013	lncRNA:CR45457
CG32032	FBgn0043806	FBgn0043806	CG32032
CG15105	FBgn0265356	FBgn0265356	tn
CG10596	FBgn0015766	FBgn0015766	Msr-110
CG8497	FBgn0026374	FBgn0026374	Rhp
CG15436	FBgn0031610	FBgn0031610	CG15436
CG8636	FBgn0029629	FBgn0029629	eIF3g1
CG43444	FBgn0263392	FBgn0263392	Tet
CR45994	FBgn0267656	FBgn0267656	lncRNA:CR45994
CG6713	FBgn0011676	FBgn0011676	Nos
CG13088	FBgn0032047	FBgn0032047	CG13088
CG7168	FBgn0038586	FBgn0038586	CG7168
CG17046	FBgn0001316	FBgn0001316	klar
CG4871	FBgn0035050	FBgn0035050	SiaT
CG4209	FBgn0010014	FBgn0010014	CanB
CR45339	FBgn0266878	FBgn0266878	lncRNA:CR45339
CG18622	FBgn0038460	FBgn0038460	CG18622
CG34242	FBgn0085271	FBgn0085271	CG34242
CG32425	FBgn0052425	FBgn0052425	CG32425
CG17533	FBgn0063492	FBgn0063492	GstE8
CG5404	FBgn0038354	FBgn0038354	CG5404
CG7100	FBgn0015609	FBgn0015609	CadN
CG1677	FBgn0029941	FBgn0029941	CG1677
CG1677	FBgn0085967	FBgn0085967	Dsim\GD16158
CG2929	FBgn0037339	FBgn0037339	Pi4KIIalpha
CG10734	FBgn0034082	FBgn0034082	CG10734
CG6291	FBgn0026150	FBgn0026150	ApepP
CG5379	FBgn0038956	FBgn0038956	CAH8
CG9740	FBgn0037669	FBgn0037669	Ibf2
CG6720	FBgn0015320	FBgn0015320	Ubc2
CR46033	FBgn0267697	FBgn0267697	asRNA:CR46033
CR45683	FBgn0267243	FBgn0267243	asRNA:CR45683
CR43583	FBgn0263468	FBgn0263468	snoRNA:SC35-a
CG7885	FBgn0026373	FBgn0026373	RpII33
CG18243	FBgn0034085	FBgn0034085	Ptp52F
CG6095	FBgn0266668	FBgn0266668	Exo84
CG9438	FBgn0000473	FBgn0000473	Cyp6a2
CG14408	FBgn0030581	FBgn0030581	CG14408
CG14408	FBgn0068698	FBgn0068698	Dsim\GD15836
CG10080	FBgn0034641	FBgn0034641	mahj
CG10602	FBgn0032721	FBgn0032721	CG10602
CG10602	FBgn0032720	FBgn0032720	mRpL13
CG11284	FBgn0030056	FBgn0030056	CAH3
CG8646	FBgn0033763	FBgn0033763	CG8646
CG4143	FBgn0262732	FBgn0262732	mbf1
CG11000	FBgn0263353	FBgn0263353	CG11000
CG7368	FBgn0036179	FBgn0036179	CG7368
CG33134	FBgn0029131	FBgn0029131	Debcl
CG7414	FBgn0037135	FBgn0037135	CG7414
CG8590	FBgn0011606	FBgn0011606	Klp3A
CG42275	FBgn0259170	FBgn0259170	alpha-Man-Ia
CG33129	FBgn0053129	FBgn0053129	CG33129
CG3153	FBgn0038198	FBgn0038198	Npc2b
CG15012	FBgn0035528	FBgn0035528	CG15012
CG4822	FBgn0031220	FBgn0031220	CG4822
CR45321	FBgn0266860	FBgn0266860	lncRNA:CR45321
CG6311	FBgn0036735	FBgn0036735	Edc3
CG34407	FBgn0085436	FBgn0085436	Not1
CG14764	FBgn0033236	FBgn0033236	CG14764
CG3770	FBgn0035085	FBgn0035085	CG3770
CG2272	FBgn0030018	FBgn0030018	slpr
CG17019	FBgn0033783	FBgn0033783	CG17019
CG13300	FBgn0035699	FBgn0035699	CG13300
CG2158	FBgn0033264	FBgn0033264	Nup50
CG13133	FBgn0032181	FBgn0032181	CG13133
CG15484	FBgn0032452	FBgn0032452	CG15484
CG3193	FBgn0000377	FBgn0000377	crn
CG43388	FBgn0263220	FBgn0263220	Hk
CG13287	FBgn0035643	FBgn0035643	CG13287
CG2009	FBgn0026262	FBgn0026262	bip2
CR46125	FBgn0267800	FBgn0267800	lncRNA:CR46125
CG6251	FBgn0034118	FBgn0034118	Nup62
CG6876	FBgn0036487	FBgn0036487	Prp31
CG15015	FBgn0035533	FBgn0035533	Cip4
CG3803	FBgn0034938	FBgn0034938	CG3803
CG4258	FBgn0020305	FBgn0020305	dbe
CG5799	FBgn0020307	FBgn0020307	dve
CG31717	FBgn0051717	FBgn0051717	CG31717
CG3425	FBgn0017482	FBgn0017482	T3dh
CG10640	FBgn0035601	FBgn0035601	Uev1A
CR34624	FBgn0082974	FBgn0082974	snoRNA:Psi28S-3305c
CG3400	FBgn0027621	FBgn0027621	Pfrx
CG32022	FBgn0052022	FBgn0052022	CG32022
CG12359	FBgn0027603	FBgn0027603	Ulp1
CG1804	FBgn0039862	FBgn0039862	kek6
CG10616	FBgn0036286	FBgn0036286	CG10616
CR46050	FBgn0267717	FBgn0267717	asRNA:CR46050
CG1660	FBgn0030480	FBgn0030480	Tim9a
CG3368	FBgn0039508	FBgn0039508	CG3368
CG8668	FBgn0031988	FBgn0031988	CG8668
CG8733	FBgn0036910	FBgn0036910	Cyp305a1
CG8211	FBgn0030858	FBgn0030858	IntS2
CG4119	FBgn0028474	FBgn0028474	CG4119
CG8844	FBgn0021967	FBgn0021967	ND-PDSW
CG8844	FBgn0081351	FBgn0081351	Dpse\GA21363
CG11858	FBgn0039305	FBgn0039305	CG11858
CG10139	FBgn0033951	FBgn0033951	CG10139
CR44097	FBgn0264906	FBgn0264906	lncRNA:CR44097
CG10947	FBgn0032857	FBgn0032857	CG10947
CG31159	FBgn0051159	FBgn0051159	mRRF2
CG1136	FBgn0035490	FBgn0035490	CG1136
CG10927	FBgn0034360	FBgn0034360	CG10927
CG8640	FBgn0035735	FBgn0035735	Cpr65Ea
CG13891	FBgn0035139	FBgn0035139	CG13891
CG6359	FBgn0038065	FBgn0038065	Snx3
CG13379	FBgn0036804	FBgn0036804	Sgf11
CG5718	FBgn0036222	FBgn0036222	SdhAL
CG5718	FBgn0079079	FBgn0079079	Dpse\GA19081
CG3481	FBgn0000055	FBgn0000055	Adh
CG31152	FBgn0086253	FBgn0086253	rumi
CG31785	FBgn0051785	FBgn0051785	CG31785
CG1890	FBgn0039869	FBgn0039869	CG1890
CG11975	FBgn0037648	FBgn0037648	CG11975
CR45962	FBgn0267624	FBgn0267624	lncRNA:CR45962
CR32657	FBgn0052657	FBgn0052657	lncRNA:CR32657
CG3002	FBgn0030141	FBgn0030141	Gga
CG32572	FBgn0052572	FBgn0052572	CG32572
CG1597	FBgn0030289	FBgn0030289	GCS1
CG11997	FBgn0037662	FBgn0037662	CG11997
CG33198	FBgn0053198	FBgn0053198	pen-2
CG10370	FBgn0028684	FBgn0028684	Rpt5
CG11030	FBgn0031736	FBgn0031736	CG11030
CG1101	FBgn0010774	FBgn0010774	Ref1
CG32202	FBgn0052202	FBgn0052202	CG32202
CG13068	FBgn0036588	FBgn0036588	CG13068
CG17637	FBgn0037004	FBgn0037004	CG17637
CR45467	FBgn0267023	FBgn0267023	asRNA:CR45467
CG3616	FBgn0015040	FBgn0015040	Cyp9c1
CG16863	FBgn0028931	FBgn0028931	CG16863
CG1084	FBgn0037240	FBgn0037240	Cont
CG10642	FBgn0004380	FBgn0004380	Klp64D
CG17221	FBgn0031500	FBgn0031500	CG17221
CG42237	FBgn0250862	FBgn0250862	CG42237
CG44014	FBgn0264776	FBgn0264776	CG44014
CR45251	FBgn0266786	FBgn0266786	lncRNA:CR45251
CG31076	FBgn0051076	FBgn0051076	CG31076
CG4942	FBgn0035960	FBgn0035960	CG4942
CG11051	FBgn0040813	FBgn0040813	Nplp2
CG5557	FBgn0010768	FBgn0010768	sqz
CG1643	FBgn0029943	FBgn0029943	Atg5
CG34391	FBgn0085420	FBgn0085420	DIP-delta
CG6386	FBgn0027889	FBgn0027889	ball
CG3835	FBgn0023507	FBgn0023507	D2hgdh
CG43788	FBgn0264329	FBgn0264329	CG43788
CG4802	FBgn0034215	FBgn0034215	Mtap
CG8814	FBgn0031478	FBgn0031478	CG8814
CG7853	FBgn0036695	FBgn0036695	Papst2
CG3931	FBgn0034879	FBgn0034879	Rrp4
CG14593	FBgn0033058	FBgn0033058	CCHa2-R
CG5224	FBgn0034354	FBgn0034354	GstE11
CG10747	FBgn0032845	FBgn0032845	CG10747
CG3476	FBgn0031881	FBgn0031881	MME1
CG14086	FBgn0036860	FBgn0036860	CG14086
CG12403	FBgn0265262	FBgn0265262	Vha68-1
CG9100	FBgn0031882	FBgn0031882	Rab30
CG6608	FBgn0037852	FBgn0037852	Tpc1
CG10098	FBgn0037472	FBgn0037472	CG10098
CG17707	FBgn0025835	FBgn0025835	CG17707
CG7788	FBgn0019972	FBgn0019972	Drice
CG4584	FBgn0250837	FBgn0250837	dUTPase
CG34398	FBgn0085427	FBgn0085427	CG34398
CG11391	FBgn0038732	FBgn0038732	CG11391
CR43653	FBgn0263662	FBgn0263662	lncRNA:CR43653
CG5463	FBgn0039153	FBgn0039153	GatB
CR44272	FBgn0265299	FBgn0265299	lncRNA:CR44272
CG11347	FBgn0035542	FBgn0035542	DOR
CG4089	FBgn0037838	FBgn0037838	TTLL15
CG8067	FBgn0033891	FBgn0033891	CG8067
CG6589	FBgn0032368	FBgn0032368	spag4
CG13055	FBgn0036583	FBgn0036583	CG13055
CG4345	FBgn0015946	FBgn0015946	grim
CG10493	FBgn0032749	FBgn0032749	Phlpp
CG9060	FBgn0030096	FBgn0030096	Zpr1
CG11526	FBgn0035437	FBgn0035437	Strip
CG13232	FBgn0033578	FBgn0033578	BBS4
CG17569	FBgn0286567	FBgn0286567	gry
CG10667	FBgn0286788	FBgn0286788	Orc1
CG30156	FBgn0050156	FBgn0050156	CG30156
CG6155	FBgn0014877	FBgn0014877	Roe1
CG31201	FBgn0051201	FBgn0051201	GluRIIE
CG11055	FBgn0034491	FBgn0034491	Hsl
CG11055	FBgn0082756	FBgn0082756	Dsim\GD11499
CG2914	FBgn0005660	FBgn0005660	Ets21C
CR43496	FBgn0263507	FBgn0263507	lncRNA:CR43496
CR45185	FBgn0267495	FBgn0267495	asRNA:CR45185
[truncated: 9,246 more rows]
