# Supplementary material for: The Drosophila brain on cocaine at single-cell resolution
Source: Genome Res. 2021 Oct;31(10):1927–37. doi: 10.1101/gr.268037.120 (PMC8494231; doi:10.1101/gr.268037.120)
Supplement: Supplemental Material [file supp_gr.268037.120_Supplemental_Table_S6_xlsx.xlsx]

## Sheet: Global_C0
FlyBaseID	GeneID	Gene symbol	p_val	avg_diff	pct.1	pct.2	p_val_adj
FBgn0019660	CR32665	lncRNA:roX2	0	-1.51254	0.004	0.62	0
FBgn0058469	CR40469	lncRNA:CR40469	5.05851e-61	0.0907269	0.146	0.073	7.58776e-58
FBgn0087002	CG11064	apolpp	4.92941e-49	0.109738	0.147	0.064	7.39411e-46
FBgn0052057	CG32057	dpr10	1.36019e-38	0.1652	0.231	0.13	2.04029e-35
FBgn0050115	CG30115	GEFmeso	1.17505e-34	0.0697343	0.127	0.075	1.76257e-31
FBgn0052982	CG32982	CG32982	5.48559e-34	0.118215	0.179	0.105	8.22839e-31
FBgn0051690	CG31690	CG31690	1.34183e-27	0.169118	0.298	0.201	2.01274e-24
FBgn0029768	CG16752	SPR	2.10605e-27	0.222729	0.238	0.132	3.15907e-24
FBgn0013995	CG5685	Calx	6.69439e-27	0.213939	0.32	0.206	1.00416e-23
FBgn0036789	CG13702	AstC-R2	8.83041e-27	0.150299	0.181	0.11	1.32456e-23
FBgn0004573	CG12073	5-HT7	1.61859e-26	0.061886	0.134	0.08	2.42788e-23
FBgn0052683	CG32683	CG32683	1.75734e-25	0.136868	0.212	0.13	2.636e-22
FBgn0037963	CG6977	Cad87A	1.75801e-25	0.134444	0.228	0.149	2.63701e-22
FBgn0267431	CG45784	Myo81F	3.24809e-25	0.0954846	0.174	0.113	4.87213e-22
FBgn0283651	CG46301	CG46301	6.62377e-25	0.184075	0.315	0.227	9.93565e-22
FBgn0003301	CG9533	rut	9.98327e-25	0.126844	0.253	0.154	1.49749e-21
FBgn0020621	CG2049	Pkn	1.70378e-24	0.0766048	0.15	0.087	2.55567e-21
FBgn0285926	CG1691	Imp	4.63501e-24	0.501487	0.288	0.166	6.95252e-21
FBgn0259677	CG42346	CG42346	5.22967e-24	0.097368	0.178	0.108	7.8445e-21
FBgn0002940	CG4550	ninaE	7.25623e-24	-0.121808	0.113	0.19	1.08844e-20
FBgn0031299	CG4629	CG4629	1.09912e-23	0.0671546	0.171	0.121	1.64868e-20
FBgn0052066	CG32066	CG32066	1.3873e-23	0.0680448	0.177	0.121	2.08094e-20
FBgn0267322	CR45758	lncRNA:CR45758	3.76511e-23	0.0906051	0.21	0.147	5.64766e-20
FBgn0260429	CG42524	CG42524	5.93433e-23	0.0753463	0.171	0.119	8.9015e-20
FBgn0087012	CG1056	5-HT2A	1.93261e-22	0.0909867	0.134	0.072	2.89891e-19
FBgn0004619	CG8442	GluRIA	4.76013e-22	0.298283	0.367	0.236	7.14019e-19
FBgn0264090	CG43759	CG43759	1.5434e-21	0.174692	0.238	0.15	2.3151e-18
FBgn0264753	CG44011	Rgk1	3.48303e-21	0.13486	0.187	0.11	5.22455e-18
FBgn0261260	CG42611	mgl	2.18107e-20	0.102553	0.204	0.133	3.27161e-17
FBgn0262473	CG5490	Tl	2.47234e-20	0.0822786	0.183	0.119	3.70851e-17
FBgn0033987	CG12424	ckn	7.81715e-20	0.0615253	0.175	0.125	1.17257e-16
FBgn0002543	CG5481	robo2	8.45901e-20	0.116596	0.157	0.098	1.26885e-16
FBgn0052521	CG32521	CG32521	6.19014e-19	0.0594662	0.135	0.085	9.28521e-16
FBgn0250867	CG42238	CG42238	6.40958e-19	0.108046	0.236	0.167	9.61436e-16
FBgn0083228	CG5907	Frq2	2.54082e-18	0.346597	0.413	0.263	3.81124e-15
FBgn0004395	CG4620	unk	3.17785e-17	0.0980556	0.235	0.174	4.76678e-14
FBgn0085397	CG34368	Fili	1.02649e-16	0.0656368	0.145	0.1	1.53973e-13
FBgn0001234	CR31400	lncRNA:Hsromega	1.98663e-16	2.03258	0.988	0.986	2.97994e-13
FBgn0260971	CG42594	CG42594	3.64873e-16	0.22061	0.295	0.189	5.47309e-13
FBgn0019662	CG8593	qm	2.04523e-15	0.0561141	0.116	0.073	3.06784e-12
FBgn0261090	CG42333	Sytbeta	4.27915e-15	0.105249	0.24	0.173	6.41872e-12
FBgn0040877	CG12994	CG12994	4.30366e-15	0.0604903	0.112	0.07	6.45549e-12
FBgn0029663	CG10804	CG10804	7.81385e-15	0.586526	0.644	0.476	1.17208e-11
FBgn0261649	CG31247	tinc	9.83231e-15	0.0825229	0.186	0.127	1.47485e-11
FBgn0013688	CR34096	mt:srRNA	1.81322e-14	0.0678095	0.154	0.092	2.71983e-11
FBgn0267910	CR34335	lncRNA:CR34335	2.11873e-14	10.6262	0.986	0.892	3.17809e-11
FBgn0031738	CG9171	CG9171	3.3076e-14	0.0637639	0.151	0.104	4.9614e-11
FBgn0030158	CG9686	CG9686	4.4621e-14	0.0743731	0.115	0.063	6.69315e-11
FBgn0053087	CG33087	LRP1	7.37058e-14	0.0327775	0.115	0.085	1.10559e-10
FBgn0052626	CG32626	AMPdeam	7.70924e-14	0.0507553	0.188	0.152	1.15639e-10
FBgn0086604	CG12484	side-VIII	9.93156e-14	0.14323	0.282	0.203	1.48973e-10
FBgn0283499	CG18402	InR	1.64939e-13	0.101199	0.258	0.188	2.47408e-10
FBgn0085399	CG34370	CG34370	2.95608e-13	0.0633252	0.149	0.102	4.43412e-10
FBgn0000179	CG3578	bi	6.65534e-13	0.301784	0.302	0.211	9.98301e-10
FBgn0000121	CG5962	Arr2	7.09214e-13	-0.0519002	0.095	0.136	1.06382e-09
FBgn0005677	CG4952	dac	1.32037e-12	0.0847838	0.103	0.062	1.98056e-09
FBgn0085753	CR40596	28SrRNA-Psi:CR40596	1.3316e-12	0.0713343	0.148	0.095	1.9974e-09
FBgn0036801	CG6896	MYPT-75D	2.57906e-12	0.112485	0.253	0.186	3.8686e-09
FBgn0051092	CG31092	LpR2	2.6224e-12	0.0259928	0.133	0.108	3.9336e-09
FBgn0000547	CG12676	ed	6.7132e-12	0.137896	0.238	0.166	1.00698e-08
FBgn0050463	CG30463	Pgant9	1.01359e-11	0.121155	0.247	0.18	1.52039e-08
FBgn0031294	CG31795	IA-2	1.29687e-11	7.21966	0.993	0.993	1.9453e-08
FBgn0025525	CG9102	bab2	1.39358e-11	0.0522427	0.137	0.107	2.09037e-08
FBgn0051814	CG31814	DIP-kappa	8.37849e-11	0.123333	0.182	0.127	1.25677e-07
FBgn0033159	CG17800	Dscam1	9.51992e-11	0.102365	0.289	0.234	1.42799e-07
FBgn0085426	CG34397	Rgk3	1.33077e-10	0.0782665	0.143	0.099	1.99615e-07
FBgn0034897	CG11299	Sesn	1.34691e-10	0.0534999	0.118	0.085	2.02037e-07
FBgn0051324	CG31324	CG31324	1.59095e-10	0.0975787	0.194	0.133	2.38642e-07
FBgn0050361	CG30361	mtt	2.46424e-10	0.0674348	0.164	0.124	3.69636e-07
FBgn0029824	CG3726	CG3726	8.88455e-10	0.134119	0.204	0.133	1.33268e-06
FBgn0003499	CG7847	sr	1.17119e-09	0.0815562	0.295	0.247	1.75678e-06
FBgn0263706	CG43658	CG43658	1.37425e-09	0.0992264	0.194	0.138	2.06138e-06
FBgn0259170	CG42275	alpha-Man-Ia	1.52319e-09	0.0627974	0.182	0.135	2.28479e-06
FBgn0004595	CG17228	pros	1.90957e-09	6.39516	0.892	0.875	2.86435e-06
FBgn0031016	CG12199	kek5	1.9471e-09	0.0292423	0.131	0.104	2.92065e-06
FBgn0264794	CR44024	lncRNA:CR44024	2.56626e-09	0.134004	0.33	0.268	3.84939e-06
FBgn0012344	CG8348	Dh44	2.70554e-09	0.0388854	0.103	0.082	4.05831e-06
FBgn0002945	CG11614	nkd	2.79718e-09	0.198303	0.319	0.228	4.19577e-06
FBgn0004607	CG1449	zfh2	3.88681e-09	0.102421	0.153	0.107	5.83021e-06
FBgn0052698	CG32698	CARPB	4.99136e-09	0.121821	0.139	0.095	7.48704e-06
FBgn0285963	CG46339	CG46339	7.0974e-09	0.0376038	0.137	0.104	1.06461e-05
FBgn0027654	CG2239	jdp	8.06828e-09	0.254092	0.794	0.771	1.21024e-05
FBgn0051760	CG31760	CG31760	8.11312e-09	0.0872147	0.249	0.195	1.21697e-05
FBgn0013718	CG33991	nuf	8.27577e-09	0.0414415	0.106	0.071	1.24137e-05
FBgn0004168	CG16720	5-HT1A	1.2568e-08	0.147668	0.294	0.234	1.88519e-05
FBgn0262614	CG43140	pyd	1.72049e-08	0.124263	0.234	0.178	2.58074e-05
FBgn0015774	CG10521	NetB	1.72053e-08	0.240241	0.329	0.25	2.5808e-05
FBgn0024944	CG3856	Oamb	2.02855e-08	0.0406554	0.115	0.082	3.04283e-05
FBgn0065099	CR33925	snRNA:7SK	2.35083e-08	1.15423	0.786	0.68	3.52625e-05
FBgn0266429	CG2872	AstA-R1	3.34081e-08	0.0516606	0.106	0.072	5.01121e-05
FBgn0000636	CG5803	Fas3	3.62507e-08	0.0580518	0.235	0.199	5.43761e-05
FBgn0020269	CG10145	mspo	3.75002e-08	0.131875	0.269	0.209	5.62503e-05
FBgn0014859	CG1864	Hr38	4.82752e-08	-0.240662	0.403	0.423	7.24128e-05
FBgn0004652	CG14307	fru	5.14934e-08	0.317998	0.322	0.205	7.72401e-05
FBgn0263772	CG43689	CG43689	6.33551e-08	0.198941	0.125	0.083	9.50326e-05
FBgn0263773	CG43690	fok	6.59525e-08	0.110165	0.26	0.193	9.89287e-05
FBgn0002643	CG8118	mam	1.09194e-07	0.0780717	0.211	0.156	0.000163791
FBgn0040153	CG32597	l(1)G0469	1.41938e-07	0.0457765	0.124	0.087	0.000212907
FBgn0051163	CG31163	SKIP	1.6495e-07	0.276659	0.371	0.271	0.000247425
FBgn0031530	CG3254	Pgant2	1.68599e-07	0.0779172	0.187	0.156	0.000252898
FBgn0261046	CG31190	Dscam3	1.83435e-07	0.049624	0.215	0.182	0.000275152
FBgn0259245	CG42343	DIP-beta	2.0895e-07	0.0876631	0.147	0.105	0.000313425
FBgn0053639	CG33639	CG33639	2.81625e-07	0.0559442	0.107	0.071	0.000422437
FBgn0267001	CG42338	Ten-a	2.90319e-07	1.91439	0.885	0.758	0.000435478
FBgn0264975	CG1634	Nrg	2.98842e-07	0.0621379	0.236	0.203	0.000448263
FBgn0085382	CG34353	CG34353	3.41317e-07	0.0851932	0.272	0.222	0.000511975
FBgn0004102	CG12154	oc	3.49297e-07	0.0784259	0.137	0.102	0.000523946
FBgn0250910	CG42244	Octbeta3R	3.59976e-07	0.0610621	0.178	0.132	0.000539964
FBgn0039209	CG13624	REPTOR	3.83951e-07	0.115128	0.295	0.224	0.000575927
FBgn0260442	CG6831	rhea	4.12112e-07	0.0278966	0.139	0.11	0.000618167
FBgn0045038	CG7105	Proc	4.49521e-07	0.0620062	0.103	0.072	0.000674281
FBgn0011818	CG9884	oaf	4.53436e-07	0.0512649	0.16	0.126	0.000680154
FBgn0001085	CG17697	fz	5.31055e-07	0.0847746	0.231	0.182	0.000796582
FBgn0004882	CG10868	orb	5.41915e-07	0.0585474	0.144	0.108	0.000812873
FBgn0085385	CG34356	bma	5.6458e-07	0.134703	0.291	0.24	0.00084687
FBgn0040765	CG33473	luna	6.72606e-07	0.349305	0.416	0.303	0.00100891
FBgn0085420	CG34391	DIP-delta	7.39528e-07	0.164636	0.329	0.274	0.00110929
FBgn0052204	CG32204	CG32204	8.61078e-07	0.0599303	0.143	0.103	0.00129162
FBgn0261113	CG17836	Xrp1	9.5034e-07	0.0542069	0.262	0.226	0.00142551
FBgn0030913	CG6123	CG6123	9.86324e-07	0.210965	0.438	0.388	0.00147949
FBgn0051475	CG31475	CG31475	1.07177e-06	0.0363858	0.115	0.086	0.00160765
FBgn0085409	CG34380	smal	1.43972e-06	0.0575195	0.248	0.213	0.00215958
FBgn0033403	CG13739	CG13739	1.44863e-06	0.280692	0.342	0.228	0.00217294
FBgn0052183	CG32183	Ccn	1.61734e-06	0.0675747	0.184	0.143	0.002426
FBgn0036454	CG17839	CG17839	1.76273e-06	0.0671582	0.171	0.127	0.0026441
FBgn0013733	CG18076	shot	2.02509e-06	0.106008	0.347	0.28	0.00303764
FBgn0004885	CG6863	tok	2.0895e-06	0.0673844	0.185	0.144	0.00313426
FBgn0032666	CG5758	CG5758	2.12138e-06	0.137044	0.297	0.234	0.00318207
FBgn0024321	CG8524	NK7.1	2.23001e-06	0.0415382	0.187	0.159	0.00334502
FBgn0038246	CG14853	CG14853	2.5121e-06	0.0559346	0.17	0.13	0.00376815
FBgn0267253	CG32700	CG32700	3.62445e-06	0.179991	0.333	0.255	0.00543668
FBgn0261285	CG5629	Ppcs	4.3915e-06	0.0878015	0.227	0.179	0.00658725
FBgn0085413	CG34384	CG34384	5.01398e-06	0.105537	0.275	0.211	0.00752097
FBgn0085370	CG34341	Pde11	5.22594e-06	0.0661559	0.176	0.137	0.00783891
FBgn0000659	CG10002	fkh	5.95149e-06	0.142019	0.182	0.14	0.00892724
FBgn0033405	CG13954	CG13954	7.1185e-06	0.115869	0.265	0.202	0.0106777
FBgn0040532	CG8369	CG8369	7.90621e-06	0.0907527	0.185	0.138	0.0118593
FBgn0050419	CG30419	CG30419	8.39438e-06	0.0639364	0.203	0.17	0.0125916
FBgn0267033	CG45477	mamo	8.89747e-06	0.937605	0.451	0.303	0.0133462
FBgn0015519	CG2302	nAChRalpha3	1.02391e-05	0.132977	0.261	0.191	0.0153587
FBgn0052506	CG32506	CG32506	1.25329e-05	0.0612949	0.269	0.227	0.0187993
FBgn0265194	CG44240	Trpm	1.30913e-05	0.0309735	0.143	0.12	0.019637
FBgn0029939	CG9650	CG9650	1.3248e-05	0.165128	0.14	0.095	0.019872
FBgn0031971	CG7224	Sirup	1.37529e-05	0.0056582	0.17	0.164	0.0206294
FBgn0053516	CG33516	dpr3	1.48066e-05	0.0521537	0.165	0.131	0.0222099
FBgn0039420	CG6154	CG6154	1.51245e-05	0.0680583	0.194	0.153	0.0226868
FBgn0265595	CG44422	CG44422	1.52287e-05	0.259734	0.341	0.244	0.0228431
FBgn0037941	CG12594	CG12594	1.73481e-05	0.114355	0.259	0.213	0.0260221
FBgn0004580	CG6702	Cbp53E	1.96344e-05	1.83084	0.65	0.476	0.0294515
FBgn0032629	CG15138	beat-IIIc	2.15188e-05	0.235661	0.334	0.254	0.0322782
FBgn0051191	CG31191	CG31191	2.46292e-05	0.054767	0.125	0.09	0.0369438
FBgn0283451	CG11491	br	2.51164e-05	0.121727	0.231	0.203	0.0376745
FBgn0000287	CG4881	salr	2.65072e-05	0.10597	0.137	0.104	0.0397608
FBgn0028888	CG4168	CG4168	2.73454e-05	0.0310858	0.124	0.098	0.0410181
FBgn0010434	CG11949	cora	2.79282e-05	0.0380289	0.198	0.172	0.0418922
FBgn0000064	CG6058	Ald1	3.22296e-05	-0.00538361	0.759	0.764	0.0483444
FBgn0259243	CG42341	Pka-R1	3.33901e-05	0.132587	0.418	0.351	0.0500852
FBgn0035816	CG13685	CG13685	3.64539e-05	0.0462837	0.2	0.162	0.0546809
FBgn0025382	CG14791	Rab27	4.31266e-05	-0.0237668	0.148	0.171	0.0646899
FBgn0263873	CG43720	sick	4.49711e-05	0.0310549	0.129	0.102	0.0674566
FBgn0037546	CG7918	mAChR-B	4.91995e-05	0.0229763	0.11	0.091	0.0737993
FBgn0051646	CG31646	DIP-theta	4.98204e-05	0.0985801	0.191	0.152	0.0747306
FBgn0262018	CG42829	CadN2	5.3549e-05	0.0409069	0.164	0.132	0.0803235
FBgn0086359	CG3953	Invadolysin	5.45129e-05	0.0276105	0.18	0.16	0.0817693
FBgn0038542	CG7431	TyrR	5.89534e-05	0.0426091	0.113	0.095	0.0884301
FBgn0031306	CG4577	CG4577	5.91174e-05	0.297733	0.405	0.346	0.0886762
FBgn0035173	CG13907	CG13907	6.29892e-05	0.0260986	0.105	0.082	0.0944838
FBgn0024189	CG33141	sns	7.04886e-05	0.03669	0.17	0.141	0.105733
FBgn0259111	CG42253	Ndae1	7.1855e-05	0.0372755	0.163	0.134	0.107783
FBgn0264339	CG43795	CG43795	7.2217e-05	-0.0611139	0.228	0.249	0.108325
FBgn0027356	CG8604	Amph	7.86744e-05	0.0435079	0.18	0.148	0.118012
FBgn0263392	CG43444	Tet	7.93109e-05	0.245658	0.576	0.512	0.118966
FBgn0037015	CG13253	cmpy	0.000105206	0.120869	0.341	0.286	0.15781
FBgn0263257	CG43395	Cngl	0.00010736	1.10148	0.764	0.681	0.16104
FBgn0028370	CG4192	kek3	0.000110242	0.0519185	0.16	0.124	0.165362
FBgn0030505	CG11172	NFAT	0.000126785	0.18602	0.424	0.338	0.190177
FBgn0259212	CG42312	cno	0.000136156	0.0447333	0.114	0.078	0.204234
FBgn0042696	CG2380	NfI	0.000152203	0.0596069	0.195	0.155	0.228305
FBgn0250908	CG42242	beat-VII	0.000164946	0.0915314	0.335	0.279	0.247419
FBgn0243512	CG7850	puc	0.000165547	0.0155766	0.148	0.133	0.248321
FBgn0001297	CG33956	kay	0.000167863	0.0189488	0.107	0.09	0.251794
FBgn0033368	CG13743	CG13743	0.00017997	0.0606578	0.202	0.165	0.269954
FBgn0052600	CG32600	dpr8	0.000188317	0.229886	0.466	0.377	0.282475
FBgn0261509	CG14351	haf	0.000196471	0.0600075	0.135	0.099	0.294706
FBgn0011224	CG31000	heph	0.000199653	0.987908	0.632	0.568	0.29948
FBgn0265052	CG44167	St3	0.000200916	0.0326162	0.156	0.129	0.301375
FBgn0263994	CG43737	CG43737	0.000202112	0.381322	0.569	0.432	0.303168
FBgn0026411	CG11354	Lim1	0.000221032	0.189841	0.168	0.126	0.331548
FBgn0023095	CG11282	caps	0.000241539	0.020685	0.137	0.121	0.362309
FBgn0085390	CG34361	Dgk	0.000274413	0.0434598	0.109	0.075	0.411619
FBgn0019985	CG11144	mGluR	0.000286714	0.172754	0.371	0.312	0.43007
FBgn0261999	CG42817	Ca-Ma2d	0.000314614	0.0455651	0.243	0.211	0.471922
FBgn0086680	CG10037	vvl	0.00031869	0.103418	0.12	0.084	0.478034
FBgn0037153	CG12673	olf413	0.000333351	0.143391	0.35	0.292	0.500026
FBgn0263220	CG43388	Hk	0.000344838	0.489654	0.696	0.593	0.517257
FBgn0051361	CG31361	dpr17	0.00035415	0.0931352	0.193	0.148	0.531225
FBgn0030574	CG9413	sbm	0.000405856	0.0346031	0.194	0.174	0.608784
FBgn0016797	CG9739	fz2	0.000485526	0.105324	0.283	0.236	0.728288
FBgn0266100	CG44837	CG44837	0.000510948	0.0428648	0.157	0.13	0.766422
FBgn0035756	CG32381	unc-13-4A	0.000510966	0.147642	0.349	0.293	0.766449
FBgn0032048	CG13094	Dh31	0.000527523	0.149977	0.104	0.087	0.791285
FBgn0260003	CG34157	Dys	0.000562619	0.0421881	0.167	0.139	0.843928
FBgn0030174	CG15312	CG15312	0.000573106	0.0545625	0.221	0.187	0.859658
FBgn0040726	CG13439	dpr1	0.000618235	0.138543	0.298	0.231	0.927353
FBgn0031736	CG11030	CG11030	0.000619897	0.0605918	0.296	0.267	0.929846
FBgn0014184	CG16747	Oda	0.000686504	0.305721	0.697	0.663	1
FBgn0030272	CG15201	CG15201	0.000739055	0.0702238	0.142	0.114	1
FBgn0033791	CG3915	Drl-2	0.000773325	0.0196976	0.181	0.172	1
FBgn0003326	CG17579	sca	0.000790331	0.06396	0.181	0.147	1
FBgn0263219	CG42330	Dscam4	0.000836531	0.128202	0.288	0.23	1
FBgn0264273	CG33960	Sema2b	0.000845513	0.124691	0.257	0.206	1
FBgn0261588	CG42698	pdm3	0.00096569	0.105851	0.261	0.226	1
FBgn0260941	CG42318	app	0.0010471	0.0634899	0.209	0.184	1
FBgn0053517	CG33517	Dop2R	0.00116847	2.3645	0.933	0.907	1
FBgn0035495	CG14989	CG14989	0.0013139	0.419622	0.337	0.268	1
FBgn0266377	CG45019	Pde8	0.00142313	0.0378772	0.182	0.158	1
FBgn0028481	CG4341	CG4341	0.00154799	0.0741472	0.258	0.215	1
FBgn0052206	CG32206	CG32206	0.00157094	0.0836169	0.235	0.187	1
FBgn0262509	CG43079	nrm	0.00157732	0.076953	0.266	0.214	1
FBgn0083975	CG34139	Nlg4	0.00179695	0.0408719	0.182	0.151	1
FBgn0001224	CG4463	Hsp23	0.0019269	-0.0130202	0.224	0.213	1
FBgn0261698	CG42732	SLO2	0.00196398	0.0829193	0.257	0.212	1
FBgn0066101	CG31094	LpR1	0.00217563	0.0837223	0.22	0.182	1
FBgn0038980	CG6919	Octbeta1R	0.00223146	0.0798029	0.18	0.144	1
FBgn0031770	CG13995	CG13995	0.00223956	0.0571889	0.25	0.215	1
FBgn0264895	CG44086	RapGAP1	0.00224809	0.291107	0.414	0.345	1
FBgn0028645	CG7644	beat-Ib	0.00241432	0.0980541	0.301	0.259	1
FBgn0000097	CG3166	aop	0.00245037	0.0605302	0.213	0.176	1
FBgn0085395	CG34366	Shawl	0.00257514	0.0442505	0.144	0.114	1
FBgn0264490	CG18389	Eip93F	0.00289763	0.410576	0.366	0.27	1
FBgn0262160	CG9932	CG9932	0.00291689	0.113892	0.264	0.207	1
FBgn0026160	CG7958	tna	0.00298049	0.35175	0.471	0.344	1
FBgn0038494	CG4135	beat-IIb	0.00300356	0.0258924	0.13	0.112	1
FBgn0034725	CG6044	CG6044	0.00317916	0.0185416	0.315	0.294	1
FBgn0019643	CG3318	AANAT1	0.00343882	-0.0158404	0.169	0.191	1
FBgn0261574	CG7749	kug	0.00347562	0.0411471	0.172	0.149	1
FBgn0040823	CG14162	dpr6	0.00357228	0.051698	0.262	0.231	1
FBgn0015777	CG9261	nrv2	0.00386316	0.0421136	0.152	0.123	1
FBgn0051619	CG31619	nolo	0.00391554	0.0958074	0.265	0.22	1
FBgn0027598	CG31012	cindr	0.00455028	0.319093	0.515	0.407	1
FBgn0266851	CR45312	lncRNA:CR45312	0.00465282	-0.0464908	0.194	0.213	1
FBgn0003429	CG10693	slo	0.00481864	0.40726	0.699	0.624	1
FBgn0038063	CG33976	Octbeta2R	0.00497253	0.173262	0.402	0.338	1
FBgn0052406	CG32406	PVRAP	0.00519482	0.0457669	0.162	0.13	1
FBgn0028496	CG30116	CG30116	0.00528922	0.180146	0.41	0.357	1
FBgn0019650	CG11186	toy	0.00537322	0.0742798	0.202	0.169	1
FBgn0267668	CR46006	lncRNA:CR46006	0.00541488	0.0329868	0.13	0.109	1
FBgn0013467	CG18285	igl	0.00543529	0.487127	0.594	0.499	1
FBgn0000635	CG3665	Fas2	0.00544737	0.27785	0.322	0.217	1
FBgn0040397	CG3655	CG3655	0.00573471	0.0570255	0.15	0.114	1
FBgn0264815	CG44007	Pde1c	0.00621489	0.126235	0.315	0.25	1
FBgn0263930	CG4974	dally	0.00645449	0.0999112	0.255	0.205	1
FBgn0024841	CG1963	Pcd	0.00658231	0.071507	0.357	0.322	1
FBgn0013981	CG3379	His4r	0.00752648	0.377542	0.954	0.959	1
FBgn0053202	CG33202	dpr11	0.00754831	0.0327464	0.294	0.276	1
FBgn0003423	CG1417	slgA	0.0076349	0.239126	0.711	0.686	1
FBgn0010412	CG4464	RpS19a	0.00808913	0.0355671	0.335	0.31	1
FBgn0004198	CG11387	ct	0.00826955	0.467006	0.259	0.16	1
FBgn0004449	CG5723	Ten-m	0.00848473	0.118872	0.377	0.326	1
FBgn0001078	CG4059	ftz-f1	0.00897529	0.110222	0.281	0.216	1
FBgn0004509	CG10772	Fur1	0.0100012	0.0551284	0.221	0.193	1
FBgn0260658	CG42541	CG42541	0.0104533	-0.0514287	0.558	0.555	1
FBgn0036144	CG6207	GlcAT-P	0.010495	0.0770097	0.316	0.289	1
FBgn0085407	CG34378	Pvf3	0.0106195	0.450482	0.482	0.397	1
FBgn0085432	CG34403	pan	0.0107185	0.572769	0.739	0.651	1
FBgn0000108	CG7727	Appl	0.0107955	1.19524	0.898	0.854	1
FBgn0285944	CG9907	para	0.0125068	1.09032	0.831	0.747	1
FBgn0262593	CG43128	Shab	0.0128354	0.150141	0.415	0.346	1
FBgn0029814	CG15765	CG15765	0.0131444	0.15353	0.499	0.449	1
FBgn0261928	CG42795	CG42795	0.0132722	0.0805158	0.284	0.239	1
FBgn0023534	CG17778	CG17778	0.0133718	0.0671809	0.198	0.17	1
FBgn0001226	CG4466	Hsp27	0.0134235	-0.0957639	0.158	0.173	1
FBgn0000037	CG4356	mAChR-A	0.0137077	0.128628	0.476	0.418	1
FBgn0011582	CG9652	Dop1R1	0.0142189	0.0533639	0.247	0.222	1
FBgn0261549	CG42667	rdgA	0.0147668	0.207557	0.389	0.322	1
FBgn0262636	CG2052	dati	0.015699	0.142654	0.431	0.401	1
FBgn0264308	CG43778	CG43778	0.0159273	0.106314	0.297	0.249	1
FBgn0259234	CG42332	Camta	0.0163828	0.0309513	0.183	0.161	1
FBgn0035499	CG14996	Chd64	0.0168436	0.0331589	0.168	0.141	1
FBgn0004242	CG3139	Syt1	0.0172426	0.783381	0.878	0.866	1
FBgn0039770	CG15537	CG15537	0.0184009	0.259777	0.11	0.091	1
FBgn0260660	CG42543	Mp	0.0190452	0.0909822	0.365	0.325	1
FBgn0261988	CG17998	Gprk2	0.019614	0.261762	0.423	0.3	1
FBgn0028369	CG3653	kirre	0.0201965	0.173336	0.326	0.241	1
FBgn0264000	CG43743	GluRIB	0.0202506	0.327825	0.451	0.351	1
FBgn0263995	CG43738	cpo	0.0204131	0.368485	0.605	0.54	1
FBgn0053696	CG33696	CNMaR	0.0212361	0.0428934	0.107	0.09	1
FBgn0030723	CG14948	dpr18	0.021371	0.0313491	0.144	0.128	1
FBgn0038839	CG10830	Ktl	0.0236399	0.0166827	0.317	0.326	1
FBgn0027589	CG1688	CG1688	0.0237425	0.0274224	0.169	0.152	1
FBgn0085421	CG34392	Epac	0.0241117	0.053968	0.22	0.19	1
FBgn0260793	CG42573	2mit	0.0246235	0.0327024	0.229	0.211	1
FBgn0028875	CG32975	nAChRalpha5	0.0257194	0.623949	0.814	0.757	1
FBgn0264503	CG43902	CG43902	0.0264181	0.158749	0.245	0.185	1
FBgn0034138	CG8332	RpS15	0.0265203	0.126538	0.86	0.891	1
FBgn0261556	CG42674	CG42674	0.0270261	0.0602893	0.258	0.23	1
FBgn0262738	CG3620	norpA	0.0275769	0.137699	0.469	0.432	1
FBgn0030412	CG17762	Tomosyn	0.0301694	0.372854	0.671	0.589	1
FBgn0043364	CG4427	cbt	0.0310114	0.000555285	0.144	0.143	1
FBgn0260462	CG12163	CG12163	0.0312158	0.0300793	0.166	0.141	1
FBgn0085412	CG34383	kmr	0.0316656	0.0986681	0.295	0.249	1
FBgn0287186	CG17594	scro	0.0324991	0.0342589	0.125	0.102	1
FBgn0028704	CG18660	Nckx30C	0.0334559	0.332122	0.685	0.646	1
FBgn0051774	CG31774	fred	0.0376757	0.0520151	0.225	0.196	1
FBgn0264908	CG44099	pHCl-1	0.0377505	0.0863123	0.277	0.228	1
FBgn0038156	CG14372	side-IV	0.0431441	0.0205683	0.106	0.091	1
FBgn0010300	CG10719	brat	0.0448983	0.209816	0.449	0.387	1
FBgn0035041	CG13594	CG13594	0.0457015	0.0210661	0.113	0.097	1
FBgn0004910	CG15855	Eip63F-1	0.0462112	0.043595	0.165	0.143	1
FBgn0033446	CG1648	CG1648	0.0488155	0.041857	0.204	0.181	1
FBgn0259108	CG34387	futsch	0.0499616	1.53319	0.923	0.883	1
FBgn0261258	CG6014	rgn	0.0499642	0.0407583	0.184	0.159	1
FBgn0085447	CG34418	sif	0.0501311	0.899298	0.669	0.467	1
FBgn0038321	CG6218	CG6218	0.0504529	0.0197077	0.113	0.096	1
FBgn0259789	CG12701	zld	0.053649	0.0494555	0.189	0.174	1
FBgn0038282	CG33485	dpr9	0.0541408	0.269266	0.444	0.37	1
FBgn0039346	CG5079	CG5079	0.0545039	-0.0104086	0.135	0.148	1
FBgn0034753	CG2852	CG2852	0.0546587	-0.0296778	0.513	0.53	1
FBgn0000535	CG10952	eag	0.0546858	0.0794663	0.272	0.238	1
FBgn0041097	CG5423	robo3	0.0548138	0.0309617	0.162	0.145	1
FBgn0085387	CG34358	shakB	0.0554172	0.279322	0.513	0.446	1
FBgn0261871	CG33507	dpr2	0.0565102	0.0189624	0.144	0.13	1
FBgn0267579	CR45919	lncRNA:CR45919	0.0583202	0.0282309	0.154	0.132	1
FBgn0010452	CG11280	trn	0.0585774	0.0663312	0.141	0.115	1
FBgn0034286	CG33996	dpr13	0.0597888	0.283613	0.414	0.339	1
FBgn0261262	CG42613	CG42613	0.0627488	0.65519	0.625	0.479	1
FBgn0264386	CG15899	Ca-alpha1T	0.064416	0.762724	0.614	0.499	1
FBgn0003360	CG16944	sesB	0.0652847	0.458137	0.838	0.832	1
FBgn0010113	CG15532	hdc	0.0671038	0.819061	0.699	0.596	1
FBgn0085400	CG34371	side-V	0.071391	0.0357712	0.183	0.158	1
FBgn0270928	CG32848	VAChT	0.0715575	0.0829239	0.186	0.139	1
FBgn0031424	CG9887	VGlut	0.0720184	1.85389	0.947	0.942	1
FBgn0004369	CG11516	Ptp99A	0.0720415	0.651468	0.705	0.585	1
FBgn0264006	CG43749	dysc	0.0727699	0.463692	0.795	0.743	1
FBgn0001091	CG12055	Gapdh1	0.0760694	-0.017263	0.342	0.361	1
FBgn0038237	CG8279	Pde6	0.0765552	0.221963	0.495	0.443	1
FBgn0033192	CG2105	Corin	0.0788492	0.217292	0.515	0.463	1
FBgn0038653	CG18208	Octalpha2R	0.0823714	0.137999	0.322	0.277	1
FBgn0264606	CG43955	Fife	0.0867876	0.0811042	0.522	0.528	1
FBgn0020379	CG6312	Rfx	0.0893474	0.00771422	0.129	0.126	1
FBgn0037874	CG4800	Tctp	0.0900009	0.0290676	0.361	0.358	1
FBgn0003274	CG4918	RpLP2	0.0930832	0.0857515	0.652	0.646	1
FBgn0265598	CG44425	Bx	0.0932633	0.088347	0.17	0.141	1
FBgn0263353	CG11000	CG11000	0.0951595	0.269612	0.546	0.467	1
FBgn0003380	CG12348	Sh	0.0976933	1.78779	0.948	0.929	1
FBgn0014163	CG4609	fax	0.0999803	1.20346	0.802	0.671	1
FBgn0028644	CG4838	beat-Ic	0.100069	0.390182	0.411	0.306	1
FBgn0039584	CG14064	beat-VI	0.100297	0.023091	0.262	0.251	1
FBgn0261597	CG10305	RpS26	0.102273	0.0495993	0.774	0.805	1
FBgn0011666	CG5099	msi	0.105424	0.59896	0.55	0.372	1
FBgn0066084	CG30425	RpL41	0.10556	2.45914	0.874	0.649	1
FBgn0010415	CG10497	Sdc	0.109796	0.229795	0.673	0.641	1
FBgn0263980	CG43729	Stacl	0.111659	0.161443	0.617	0.599	1
FBgn0038498	CG14334	beat-IIa	0.11538	0.150048	0.334	0.279	1
FBgn0267336	CG34360	Glut4EF	0.116458	0.801773	0.804	0.734	1
FBgn0044328	CG32052	CG32052	0.118569	0.0648509	0.292	0.275	1
FBgn0259244	CG42342	CG42342	0.12401	0.0737766	0.434	0.429	1
FBgn0015399	CG12283	kek1	0.125732	0.159827	0.468	0.425	1
FBgn0085410	CG34381	TrissinR	0.12702	0.0298355	0.101	0.087	1
FBgn0032901	CG9339	sky	0.128898	0.0503417	0.444	0.436	1
FBgn0037525	CG17816	CG17816	0.129229	0.273348	0.539	0.455	1
FBgn0035171	CG12502	CG12502	0.138853	0.00653067	0.15	0.145	1
FBgn0039647	CG14509	jus	0.139941	0.12426	0.299	0.262	1
FBgn0036165	CG7533	chrb	0.139955	0.469267	0.682	0.632	1
FBgn0085414	CG34385	dpr12	0.142663	0.106554	0.453	0.414	1
FBgn0013576	CG32464	mtd	0.142941	0.548577	0.737	0.657	1
FBgn0031897	CG13784	CG13784	0.145556	0.0599456	0.259	0.224	1
FBgn0038087	CG10134	beat-Va	0.152473	0.0217618	0.129	0.112	1
FBgn0265182	CG44247	CG44247	0.158281	0.0635265	0.327	0.308	1
FBgn0051221	CG31221	CG31221	0.170555	1.15843	0.612	0.448	1
FBgn0261788	CG42734	Ank2	0.174904	0.783388	0.806	0.73	1
FBgn0266418	CG45058	wake	0.177527	0.0257157	0.163	0.144	1
FBgn0033438	CG1794	Mmp2	0.179427	0.0409857	0.258	0.243	1
FBgn0030090	CG12664	fend	0.182841	0.118139	0.456	0.428	1
FBgn0032151	CG4128	nAChRalpha6	0.185707	1.19938	0.827	0.738	1
FBgn0037171	CG14459	CG14459	0.187307	0.0121432	0.103	0.096	1
FBgn0013433	CG4846	beat-Ia	0.189396	0.0264623	0.193	0.178	1
FBgn0025682	CG9148	scf	0.189518	0.00902815	0.101	0.094	1
FBgn0259821	CG42402	CG42402	0.194139	0.172412	0.408	0.356	1
FBgn0000042	CG4027	Act5C	0.199454	0.387675	0.773	0.747	1
FBgn0051721	CG31721	Trim9	0.202321	0.0148632	0.101	0.09	1
FBgn0036927	CG7433	Gabat	0.203096	0.00211703	0.244	0.248	1
FBgn0039816	CG11317	CG11317	0.210933	0.0311642	0.197	0.185	1
FBgn0001235	CG17117	hth	0.221083	0.363281	0.444	0.373	1
FBgn0000036	CG5610	nAChRalpha1	0.223663	0.164089	0.423	0.369	1
FBgn0083991	CG34155	CG34155	0.229046	0.00344005	0.153	0.152	1
FBgn0053543	CG33543	CG33543	0.230074	0.268889	0.405	0.352	1
FBgn0264442	CG43860	ab	0.230606	0.0266974	0.28	0.277	1
FBgn0025885	CG11143	Inos	0.233477	0.0151693	0.115	0.103	1
FBgn0011656	CG1429	Mef2	0.234205	0.091328	0.285	0.241	1
FBgn0262737	CG7437	mub	0.2492	0.741409	0.718	0.634	1
FBgn0033250	CG14762	CG14762	0.253214	0.0557256	0.194	0.165	1
FBgn0284243	CG9277	betaTub56D	0.253635	0.0635132	0.415	0.399	1
FBgn0039064	CG4467	CG4467	0.262923	0.316281	0.546	0.44	1
FBgn0085434	CG34405	NaCP60E	0.268299	0.4144	0.654	0.563	1
FBgn0029123	CG18024	SoxN	0.270651	0.155767	0.284	0.243	1
FBgn0050158	CG30158	CG30158	0.272363	0.0123249	0.115	0.112	1
FBgn0261836	CG42768	Msp300	0.276348	0.921956	0.812	0.752	1
FBgn0027608	CG2082	CG2082	0.280443	0.0309424	0.308	0.303	1
FBgn0031632	CG15628	CG15628	0.284723	0.078624	0.471	0.46	1
FBgn0052677	CG32677	X11Lbeta	0.286314	0.178977	0.42	0.348	1
FBgn0259242	CG42340	CG42340	0.286653	0.041123	0.246	0.224	1
FBgn0003165	CG9755	pum	0.295732	0.873705	0.836	0.727	1
FBgn0000303	CG12345	ChAT	0.295907	0.0561004	0.168	0.134	1
FBgn0085383	CG34354	CG34354	0.296573	0.0694089	0.276	0.25	1
FBgn0286778	CG46385	CG46385	0.296677	0.24596	0.478	0.409	1
FBgn0052647	CG32647	CG32647	0.310561	0.0500514	0.209	0.173	1
FBgn0020907	CG14904	Scp2	0.315694	0.02321	0.157	0.15	1
FBgn0015229	CG6575	glec	0.319342	0.278271	0.377	0.256	1
FBgn0003435	CG9218	sm	0.320271	1.16579	0.914	0.896	1
FBgn0053147	CG33147	Hs3st-A	0.323316	0.218524	0.426	0.338	1
FBgn0000273	CG4379	Pka-C1	0.323468	0.431877	0.622	0.541	1
FBgn0037913	CG6783	fabp	0.323916	-0.00494688	0.16	0.165	1
FBgn0010114	CG2040	hig	0.325127	0.220625	0.531	0.496	1
FBgn0001229	CG4190	Hsp67Bc	0.334749	0.00712518	0.12	0.111	1
FBgn0053143	CG33143	CG33143	0.337114	-0.00227108	0.251	0.254	1
FBgn0266871	CR45332	lncRNA:CR45332	0.35038	0.00786589	0.141	0.14	1
FBgn0013686	CR34094	mt:lrRNA	0.356725	3.66714	0.909	0.771	1
FBgn0031414	CG33955	eys	0.359283	0.229233	0.418	0.364	1
FBgn0030897	CG5744	Frq1	0.362957	0.624071	0.613	0.485	1
FBgn0035092	CG3441	Nplp1	0.363106	0.117574	0.361	0.34	1
FBgn0000633	CG17716	CG17716	0.364523	0.413361	0.502	0.411	1
FBgn0000116	CG32031	Argk	0.367246	0.321803	0.732	0.69	1
FBgn0263397	CG8585	Ih	0.369343	0.95332	0.801	0.719	1
FBgn0037521	CG2993	CG2993	0.376955	0.0560956	0.331	0.303	1
FBgn0264087	CG43756	Slob	0.380817	0.0327057	0.196	0.174	1
FBgn0023179	CG6438	amon	0.381897	0.229265	0.461	0.386	1
FBgn0022382	CG15862	Pka-R2	0.382049	0.218495	0.429	0.346	1
FBgn0004858	CG4220	elB	0.383367	0.0395508	0.185	0.164	1
FBgn0033108	CG15236	CG15236	0.38566	0.106807	0.382	0.353	1
FBgn0262869	CG43224	Gfrl	0.387679	0.142891	0.362	0.318	1
FBgn0261089	CG5559	Sytalpha	0.387971	0.0253533	0.137	0.119	1
FBgn0050089	CG30089	CG30089	0.391401	0.0186472	0.145	0.136	1
FBgn0035032	CG4692	ATPsynF	0.395003	0.0557859	0.76	0.767	1
FBgn0024963	CG7535	GluClalpha	0.418979	0.472629	0.68	0.611	1
FBgn0010473	CG15427	tutl	0.422992	0.328805	0.643	0.587	1
FBgn0004244	CG10537	Rdl	0.426468	1.00838	0.949	0.946	1
FBgn0029761	CG10706	SK	0.42868	0.399211	0.634	0.545	1
FBgn0085391	CG34362	trv	0.431558	0.693906	0.6	0.483	1
FBgn0002593	CG4087	RpLP1	0.434879	0.0881977	0.739	0.75	1
FBgn0032833	CG10664	COX4	0.435283	-0.176748	0.767	0.814	1
FBgn0265597	CG44424	rad	0.441937	0.628639	0.629	0.559	1
FBgn0027339	CG11352	jim	0.443248	1.77701	0.946	0.935	1
FBgn0261244	CG33174	inaE	0.443448	0.18672	0.421	0.34	1
FBgn0032840	CG13968	sNPF	0.446684	0.184889	0.194	0.176	1
FBgn0032400	CG6770	CG6770	0.446923	0.521961	0.74	0.666	1
FBgn0011661	CG10701	Moe	0.451387	0.052675	0.255	0.223	1
FBgn0041707	CG1168	7B2	0.454763	0.0938854	0.866	0.876	1
FBgn0036935	CG14186	CG14186	0.462927	0.0172478	0.208	0.198	1
FBgn0266137	CG18741	Dop1R2	0.465301	0.0192458	0.105	0.094	1
FBgn0262782	CG5362	Mdh1	0.471093	-0.00359123	0.187	0.191	1
FBgn0086778	CG32538	nAChRalpha7	0.472155	0.282209	0.545	0.478	1
FBgn0033268	CG2297	Obp44a	0.472408	0.0977957	0.201	0.178	1
FBgn0261552	CG42670	ps	0.479887	0.674128	0.896	0.892	1
FBgn0004611	CG4574	Plc21C	0.480877	0.180461	0.488	0.434	1
FBgn0032797	CG10186	Hasp	0.484699	0.227689	0.83	0.831	1
FBgn0034731	CG10384	CG10384	0.486939	0.0264065	0.162	0.143	1
FBgn0085384	CG34355	CG34355	0.490784	0.22587	0.545	0.5	1
FBgn0036043	CG8177	CG8177	0.496939	0.0654295	0.33	0.305	1
FBgn0041605	CG32490	cpx	0.504118	0.73209	0.91	0.9	1
FBgn0002868	CG9470	MtnA	0.510176	0.249369	0.3	0.183	1
FBgn0031835	CG11319	CG11319	0.530626	0.0730275	0.336	0.307	1
FBgn0083963	CG34127	Nlg3	0.530824	0.168758	0.533	0.487	1
FBgn0052432	CG32432	CG32432	0.535432	0.0233318	0.183	0.166	1
FBgn0039380	CG5890	CG5890	0.539285	0.0333568	0.263	0.249	1
FBgn0263289	CG43398	scrib	0.545082	0.0145384	0.156	0.144	1
FBgn0001225	CG4183	Hsp26	0.546148	-0.0766139	0.189	0.195	1
FBgn0000024	CG17907	Ace	0.550268	0.225925	0.412	0.335	1
FBgn0259213	CG42313	side-II	0.551755	0.0485364	0.357	0.351	1
FBgn0039054	CG13830	Cow	0.552211	0.203383	0.529	0.474	1
FBgn0038826	CG17838	Syp	0.555921	0.263373	0.49	0.401	1
FBgn0284245	CG8280	eEF1alpha1	0.559028	0.0752089	0.316	0.277	1
FBgn0010313	CG2530	corto	0.566152	0.103938	0.385	0.341	1
FBgn0010411	CG8900	RpS18	0.571613	-0.121454	0.834	0.881	1
FBgn0005771	CG4491	noc	0.573618	0.0160926	0.139	0.129	1
FBgn0260657	CG42540	CG42540	0.580334	0.270352	0.708	0.67	1
FBgn0265487	CG33197	mbl	0.590807	0.624143	0.567	0.492	1
FBgn0001186	CG3001	Hex-A	0.593077	1.16556	0.699	0.482	1
FBgn0264574	CG43946	Glut1	0.612943	0.0724826	0.336	0.308	1
FBgn0265296	CG42256	Dscam2	0.613295	0.474281	0.719	0.673	1
FBgn0039089	CG10152	beat-IV	0.61609	0.032206	0.209	0.194	1
FBgn0262508	CG43078	CG43078	0.616093	0.00951818	0.102	0.089	1
FBgn0033484	CG2269	CG2269	0.617673	1.0692	0.898	0.883	1
FBgn0285952	CG3186	eEF5	0.634141	0.0472036	0.352	0.339	1
FBgn0083950	CG34114	side-VI	0.642998	0.309233	0.441	0.338	1
FBgn0005775	CG7503	Con	0.660478	0.661231	0.553	0.441	1
FBgn0013954	CG11001	Fkbp12	0.662091	0.0438432	0.538	0.531	1
FBgn0036934	CG7395	sNPF-R	0.678448	0.00729504	0.111	0.108	1
FBgn0086758	CG31666	chinmo	0.688219	0.38569	0.718	0.652	1
FBgn0036494	CG7250	Toll-6	0.69179	0.238679	0.375	0.309	1
FBgn0029897	CG3203	RpL17	0.692964	0.0725154	0.646	0.653	1
FBgn0016061	CG31062	side	0.698307	0.186452	0.481	0.439	1
FBgn0001233	CG1242	Hsp83	0.714187	0.0796175	0.677	0.666	1
FBgn0261804	CG42750	CG42750	0.714919	0.10282	0.378	0.342	1
FBgn0083949	CG34113	side-III	0.722687	0.265663	0.484	0.418	1
FBgn0285948	CG15442	RpL27A	0.743392	0.137508	0.74	0.754	1
FBgn0000575	CG1007	emc	0.746841	0.0857422	0.381	0.353	1
FBgn0260943	CG32169	Rbp6	0.751448	1.85103	0.87	0.822	1
FBgn0259171	CG42276	Pde9	0.756712	0.24957	0.579	0.546	1
FBgn0004514	CG7485	Oct-TyrR	0.77444	0.0138476	0.139	0.134	1
FBgn0015400	CG4977	kek2	0.7914	0.0881101	0.36	0.335	1
FBgn0033544	CG7220	CG7220	0.803784	0.00146897	0.227	0.228	1
FBgn0005636	CG3385	nvy	0.805134	0.00665831	0.114	0.112	1
FBgn0265002	CG44153	CG44153	0.811231	0.0102406	0.218	0.214	1
FBgn0004880	CG1130	scrt	0.818038	0.321353	0.78	0.759	1
FBgn0038929	CG13408	CG13408	0.828429	-0.00407354	0.127	0.123	1
FBgn0052017	CG32017	CG32017	0.831566	0.462563	0.802	0.775	1
FBgn0031374	CG7337	Wdr62	0.837325	0.221292	0.458	0.372	1
FBgn0039617	CG14521	DIP-gamma	0.840285	0.022597	0.193	0.191	1
FBgn0052062	CG32062	Rbfox1	0.859682	0.985317	0.837	0.744	1
FBgn0085419	CG34390	Rgk2	0.885232	0.0148431	0.147	0.144	1
FBgn0036844	CG14080	Mkp3	0.885535	0.268048	0.507	0.424	1
FBgn0052264	CG32264	CG32264	0.886174	0.596908	0.77	0.719	1
FBgn0051665	CG31665	wry	0.899682	0.35031	0.482	0.403	1
FBgn0267252	CG3694	Ggamma30A	0.910475	0.950781	0.909	0.901	1
FBgn0264001	CG43744	bru3	0.912578	1.41837	0.87	0.82	1
FBgn0013973	CG1470	Gycbeta100B	0.931354	0.0257502	0.184	0.171	1
FBgn0053179	CG33179	beat-IIIb	0.932824	0.0308343	0.307	0.297	1
FBgn0031697	CG14024	CG14024	0.946655	0.0204375	0.182	0.171	1
FBgn0003091	CG6622	Pkc53E	0.953963	0.425856	0.495	0.379	1
FBgn0017590	CG6669	klg	0.96169	0.130445	0.533	0.513	1
FBgn0000422	CG10697	Ddc	0.964555	0.169034	0.504	0.468	1
FBgn0266801	CG45263	CG45263	0.967259	0.0740241	0.422	0.405	1
FBgn0034978	CG3257	CG3257	0.971084	0.00553467	0.174	0.168	1
FBgn0010263	CG3151	Rbp9	0.976036	0.322743	0.582	0.509	1
FBgn0086677	CG30040	jeb	0.977059	0.40932	0.522	0.434	1
FBgn0015609	CG7100	CadN	0.977264	0.230805	0.563	0.502	1
FBgn0041094	CG7590	scyl	0.983111	0.172156	0.411	0.361	1
FBgn0039349	CG4685	Ssadh	0.984137	0.00305139	0.111	0.109	1
FBgn0037676	CG8861	CG8861	0.985277	0.056964	0.248	0.229	1

## Sheet: Global_C1
FlyBaseID	GeneID	Gene symbol	p_val	avg_diff	pct.1	pct.2	p_val_adj
FBgn0019660	CR32665	lncRNA:roX2	0	-1.1222	0.003	0.534	0
FBgn0004047	CG11129	Yp3	2.25023e-151	0.12954	0.104	0.001	3.37534e-148
FBgn0058469	CR40469	lncRNA:CR40469	2.12919e-49	0.100867	0.149	0.069	3.19378e-46
FBgn0035495	CG14989	CG14989	5.05364e-47	3.37877	1	1	7.58046e-44
FBgn0087002	CG11064	apolpp	3.80964e-46	0.108336	0.15	0.063	5.71446e-43
FBgn0267431	CG45784	Myo81F	1.82975e-35	0.0827964	0.155	0.093	2.74463e-32
FBgn0260429	CG42524	CG42524	7.75144e-33	0.161457	0.242	0.135	1.16272e-29
FBgn0050115	CG30115	GEFmeso	1.55377e-32	0.0994726	0.15	0.077	2.33066e-29
FBgn0029768	CG16752	SPR	1.38389e-27	0.201477	0.219	0.115	2.07584e-24
FBgn0052982	CG32982	CG32982	4.74374e-27	0.153876	0.232	0.133	7.11561e-24
FBgn0037963	CG6977	Cad87A	6.87925e-27	0.147909	0.228	0.144	1.03189e-23
FBgn0036821	CG3961	CG3961	3.55942e-26	0.14449	0.215	0.131	5.33913e-23
FBgn0002543	CG5481	robo2	1.34585e-25	0.121537	0.141	0.071	2.01878e-22
FBgn0013688	CR34096	mt:srRNA	8.60122e-25	0.096828	0.162	0.08	1.29018e-21
FBgn0052683	CG32683	CG32683	1.11189e-23	0.107208	0.184	0.113	1.66783e-20
FBgn0264753	CG44011	Rgk1	1.56038e-23	0.137068	0.197	0.098	2.34057e-20
FBgn0052057	CG32057	dpr10	5.69847e-23	0.211689	0.265	0.142	8.54771e-20
FBgn0020621	CG2049	Pkn	1.48203e-22	0.0578769	0.123	0.074	2.22305e-19
FBgn0004652	CG14307	fru	1.85584e-21	0.509058	0.376	0.169	2.78376e-18
FBgn0050361	CG30361	mtt	2.58869e-21	0.0875653	0.185	0.125	3.88304e-18
FBgn0036789	CG13702	AstC-R2	2.084e-20	0.129508	0.172	0.102	3.126e-17
FBgn0031299	CG4629	CG4629	2.14164e-20	0.0695871	0.172	0.115	3.21245e-17
FBgn0002940	CG4550	ninaE	5.69023e-20	-0.150445	0.103	0.177	8.53535e-17
FBgn0004595	CG17228	pros	1.47623e-19	4.54552	0.865	0.832	2.21435e-16
FBgn0087012	CG1056	5-HT2A	2.51883e-19	0.157274	0.164	0.086	3.77824e-16
FBgn0051690	CG31690	CG31690	1.4947e-18	0.207776	0.326	0.21	2.24205e-15
FBgn0259677	CG42346	CG42346	2.64229e-17	0.118351	0.193	0.115	3.96343e-14
FBgn0029663	CG10804	CG10804	3.21218e-17	0.788068	0.709	0.54	4.81828e-14
FBgn0085426	CG34397	Rgk3	7.19723e-17	0.0761998	0.136	0.081	1.07958e-13
FBgn0052521	CG32521	CG32521	1.14607e-16	0.0858098	0.167	0.1	1.71911e-13
FBgn0033356	CG8229	CG8229	2.54578e-16	-0.0474405	0.112	0.153	3.81867e-13
FBgn0250867	CG42238	CG42238	3.12385e-16	0.138963	0.257	0.163	4.68577e-13
FBgn0030158	CG9686	CG9686	3.42248e-16	0.0595842	0.11	0.064	5.13373e-13
FBgn0004619	CG8442	GluRIA	3.47966e-16	0.308462	0.367	0.225	5.2195e-13
FBgn0033368	CG13743	CG13743	3.69561e-16	0.0733454	0.223	0.167	5.54341e-13
FBgn0004573	CG12073	5-HT7	4.86955e-16	0.0514585	0.133	0.092	7.30433e-13
FBgn0051324	CG31324	CG31324	5.5552e-16	0.163831	0.267	0.159	8.3328e-13
FBgn0019662	CG8593	qm	7.93213e-15	0.0665158	0.116	0.06	1.18982e-11
FBgn0262473	CG5490	Tl	1.46489e-14	0.0817737	0.173	0.114	2.19733e-11
FBgn0004607	CG1449	zfh2	2.21423e-14	0.0999991	0.154	0.099	3.32135e-11
FBgn0264090	CG43759	CG43759	2.81946e-14	0.193119	0.249	0.155	4.2292e-11
FBgn0261260	CG42611	mgl	3.01038e-14	0.0831454	0.187	0.131	4.51557e-11
FBgn0285926	CG1691	Imp	4.58499e-14	0.457318	0.333	0.199	6.87749e-11
FBgn0267322	CR45758	lncRNA:CR45758	5.05945e-14	0.107173	0.206	0.129	7.58917e-11
FBgn0031294	CG31795	IA-2	7.13909e-14	4.3473	0.974	0.955	1.07086e-10
FBgn0003301	CG9533	rut	7.30495e-14	0.139871	0.261	0.159	1.09574e-10
FBgn0040877	CG12994	CG12994	1.33987e-13	0.0661092	0.11	0.066	2.00981e-10
FBgn0260971	CG42594	CG42594	1.571e-13	0.302554	0.336	0.186	2.3565e-10
FBgn0031738	CG9171	CG9171	2.03004e-13	0.0791549	0.172	0.108	3.04507e-10
FBgn0013995	CG5685	Calx	2.35978e-13	0.242993	0.301	0.172	3.53967e-10
FBgn0052698	CG32698	CARPB	5.78388e-13	0.277841	0.195	0.122	8.67582e-10
FBgn0085753	CR40596	28SrRNA-Psi:CR40596	6.33122e-13	0.0603513	0.139	0.084	9.49683e-10
FBgn0083228	CG5907	Frq2	9.81158e-13	0.363866	0.404	0.244	1.47174e-09
FBgn0031530	CG3254	Pgant2	1.0543e-12	0.0759683	0.18	0.124	1.58145e-09
FBgn0033987	CG12424	ckn	1.79115e-12	0.0698464	0.167	0.112	2.68672e-09
FBgn0283651	CG46301	CG46301	1.82368e-12	0.133846	0.256	0.185	2.73552e-09
FBgn0283499	CG18402	InR	1.84689e-12	0.0823417	0.231	0.171	2.77034e-09
FBgn0013718	CG33991	nuf	1.84799e-12	0.04107	0.109	0.074	2.77199e-09
FBgn0086680	CG10037	vvl	4.04591e-12	0.266724	0.214	0.138	6.06887e-09
FBgn0000121	CG5962	Arr2	4.72033e-12	-0.0697014	0.098	0.135	7.08049e-09
FBgn0038542	CG7431	TyrR	5.29022e-12	0.0785503	0.138	0.092	7.93534e-09
FBgn0004395	CG4620	unk	5.84786e-12	0.0808046	0.201	0.144	8.77178e-09
FBgn0003499	CG7847	sr	6.0388e-12	0.0873991	0.29	0.237	9.0582e-09
FBgn0025525	CG9102	bab2	1.51158e-11	0.0625068	0.129	0.085	2.26737e-08
FBgn0285879	CG32577	disco-r	2.60639e-11	0.1142	0.104	0.057	3.90958e-08
FBgn0053087	CG33087	LRP1	6.03819e-11	0.0395757	0.123	0.091	9.05729e-08
FBgn0261090	CG42333	Sytbeta	1.33337e-10	0.0580899	0.136	0.091	2.00006e-07
FBgn0014859	CG1864	Hr38	1.54955e-10	-0.267028	0.38	0.399	2.32432e-07
FBgn0033159	CG17800	Dscam1	3.35194e-10	0.0842547	0.217	0.157	5.02791e-07
FBgn0086604	CG12484	side-VIII	4.03954e-10	0.127034	0.251	0.174	6.05931e-07
FBgn0002945	CG11614	nkd	5.11584e-10	0.221868	0.377	0.283	7.67375e-07
FBgn0050463	CG30463	Pgant9	9.3367e-10	0.12666	0.267	0.192	1.4005e-06
FBgn0051092	CG31092	LpR2	1.78023e-09	0.0333228	0.147	0.121	2.67034e-06
FBgn0026411	CG11354	Lim1	2.3853e-09	0.2484	0.228	0.147	3.57795e-06
FBgn0004168	CG16720	5-HT1A	4.67384e-09	0.17755	0.282	0.192	7.01076e-06
FBgn0051163	CG31163	SKIP	9.8092e-09	0.310516	0.411	0.275	1.47138e-05
FBgn0001186	CG3001	Hex-A	1.2069e-08	1.74347	0.792	0.572	1.81034e-05
FBgn0263219	CG42330	Dscam4	1.68566e-08	0.077659	0.265	0.211	2.52849e-05
FBgn0045038	CG7105	Proc	1.69275e-08	0.0282908	0.193	0.161	2.53912e-05
FBgn0000547	CG12676	ed	2.34924e-08	0.14988	0.278	0.197	3.52386e-05
FBgn0000287	CG4881	salr	2.36061e-08	0.154205	0.198	0.143	3.54092e-05
FBgn0267252	CG3694	Ggamma30A	2.43952e-08	1.58338	0.903	0.876	3.65928e-05
FBgn0036801	CG6896	MYPT-75D	3.12781e-08	0.11627	0.274	0.202	4.69171e-05
FBgn0042696	CG2380	NfI	3.6982e-08	0.08404	0.23	0.169	5.5473e-05
FBgn0263772	CG43689	CG43689	3.73487e-08	0.209431	0.147	0.099	5.60231e-05
FBgn0261648	CG6464	salm	3.78511e-08	0.0685691	0.118	0.082	5.67766e-05
FBgn0261509	CG14351	haf	3.82766e-08	0.0766181	0.181	0.134	5.74149e-05
FBgn0052066	CG32066	CG32066	4.11392e-08	0.0866207	0.174	0.11	6.17089e-05
FBgn0065099	CR33925	snRNA:7SK	5.33981e-08	1.14615	0.758	0.61	8.00971e-05
FBgn0030913	CG6123	CG6123	6.81404e-08	0.156396	0.304	0.229	0.000102211
FBgn0085397	CG34368	Fili	8.81272e-08	0.0735143	0.147	0.102	0.000132191
FBgn0004910	CG15855	Eip63F-1	9.90518e-08	0.0889563	0.229	0.171	0.000148578
FBgn0030272	CG15201	CG15201	1.21783e-07	0.0773152	0.141	0.094	0.000182674
FBgn0040765	CG33473	luna	1.22789e-07	0.378446	0.416	0.284	0.000184183
FBgn0051814	CG31814	DIP-kappa	1.44482e-07	0.219246	0.256	0.189	0.000216723
FBgn0259245	CG42343	DIP-beta	1.70237e-07	0.109203	0.166	0.122	0.000255356
FBgn0085399	CG34370	CG34370	1.70821e-07	0.0829504	0.178	0.125	0.000256232
FBgn0052626	CG32626	AMPdeam	1.84712e-07	0.0578681	0.203	0.162	0.000277068
FBgn0032048	CG13094	Dh31	1.97345e-07	-0.21583	0.117	0.123	0.000296018
FBgn0264895	CG44086	RapGAP1	2.10047e-07	0.380467	0.462	0.367	0.00031507
FBgn0263773	CG43690	fok	2.25302e-07	0.121457	0.233	0.155	0.000337953
FBgn0020269	CG10145	mspo	2.25393e-07	0.173949	0.27	0.187	0.00033809
FBgn0260003	CG34157	Dys	2.44902e-07	0.0533909	0.166	0.122	0.000367353
FBgn0029939	CG9650	CG9650	2.81862e-07	0.140291	0.141	0.087	0.000422792
FBgn0001234	CR31400	lncRNA:Hsromega	2.96953e-07	2.07625	0.983	0.979	0.000445429
FBgn0031698	CG1402	Ncoa6	3.87835e-07	0.0961218	0.14	0.097	0.000581753
FBgn0024944	CG3856	Oamb	3.99946e-07	0.0403951	0.108	0.079	0.000599919
FBgn0025382	CG14791	Rab27	4.27587e-07	-0.0104285	0.098	0.11	0.00064138
FBgn0250869	CG42240	CG42240	4.66585e-07	0.0327433	0.104	0.076	0.000699878
FBgn0262160	CG9932	CG9932	5.4469e-07	0.159944	0.29	0.195	0.000817035
FBgn0029824	CG3726	CG3726	5.62564e-07	0.126349	0.228	0.149	0.000843847
FBgn0053517	CG33517	Dop2R	7.15205e-07	2.29207	0.904	0.851	0.00107281
FBgn0001224	CG4463	Hsp23	7.58944e-07	-0.0405434	0.201	0.18	0.00113842
FBgn0261649	CG31247	tinc	7.90479e-07	0.0584804	0.174	0.13	0.00118572
FBgn0000459	CG9908	disco	9.54439e-07	0.0854554	0.107	0.073	0.00143166
FBgn0019985	CG11144	mGluR	1.01431e-06	0.181252	0.37	0.296	0.00152147
FBgn0262614	CG43140	pyd	1.03962e-06	0.141839	0.236	0.166	0.00155943
FBgn0051646	CG31646	DIP-theta	1.41489e-06	0.123824	0.211	0.157	0.00212233
FBgn0085410	CG34381	TrissinR	1.79554e-06	0.0244702	0.103	0.084	0.0026933
FBgn0029897	CG3203	RpL17	2.13941e-06	-0.0316128	0.716	0.733	0.00320912
FBgn0001235	CG17117	hth	2.23791e-06	0.668324	0.628	0.544	0.00335687
FBgn0086359	CG3953	Invadolysin	2.39125e-06	0.0351751	0.161	0.134	0.00358687
FBgn0036454	CG17839	CG17839	2.40336e-06	0.0605331	0.177	0.133	0.00360504
FBgn0032629	CG15138	beat-IIIc	2.48351e-06	0.285544	0.336	0.235	0.00372527
FBgn0032666	CG5758	CG5758	2.52778e-06	0.176077	0.341	0.243	0.00379168
FBgn0264794	CR44024	lncRNA:CR44024	2.83984e-06	0.100014	0.319	0.277	0.00425976
FBgn0004882	CG10868	orb	3.30809e-06	0.042008	0.109	0.079	0.00496213
FBgn0051361	CG31361	dpr17	3.68376e-06	0.0903947	0.211	0.163	0.00552565
FBgn0040532	CG8369	CG8369	3.80973e-06	0.109106	0.181	0.124	0.0057146
FBgn0011818	CG9884	oaf	4.02829e-06	0.0756621	0.181	0.136	0.00604244
FBgn0261285	CG5629	Ppcs	4.04346e-06	0.073456	0.168	0.123	0.00606519
FBgn0285963	CG46339	CG46339	5.06702e-06	0.0692514	0.183	0.132	0.00760054
FBgn0037475	CG33323	Fer1	5.07503e-06	-0.0179503	0.148	0.139	0.00761255
FBgn0261698	CG42732	SLO2	6.45785e-06	0.173251	0.321	0.218	0.00968678
FBgn0263873	CG43720	sick	7.09237e-06	0.0344567	0.114	0.083	0.0106386
FBgn0260658	CG42541	CG42541	8.08933e-06	-0.0255397	0.481	0.454	0.012134
FBgn0263706	CG43658	CG43658	8.20416e-06	0.0675826	0.161	0.12	0.0123062
FBgn0037153	CG12673	olf413	1.01371e-05	0.113456	0.354	0.301	0.0152056
FBgn0004580	CG6702	Cbp53E	1.01898e-05	2.19155	0.633	0.475	0.0152847
FBgn0264442	CG43860	ab	1.14337e-05	0.00449492	0.352	0.352	0.0171506
FBgn0024189	CG33141	sns	1.34782e-05	0.0472281	0.157	0.116	0.0202174
FBgn0283451	CG11491	br	1.48156e-05	0.228599	0.237	0.182	0.0222235
FBgn0015519	CG2302	nAChRalpha3	1.71606e-05	0.176493	0.342	0.25	0.0257409
FBgn0040297	CG9256	Nhe2	1.72103e-05	0.0516474	0.139	0.098	0.0258155
FBgn0034286	CG33996	dpr13	1.89764e-05	0.323086	0.402	0.297	0.0284646
FBgn0265595	CG44422	CG44422	2.18845e-05	0.280404	0.349	0.226	0.0328268
FBgn0031424	CG9887	VGlut	2.23991e-05	0.252234	0.164	0.104	0.0335987
FBgn0027356	CG8604	Amph	2.31086e-05	0.0609927	0.19	0.14	0.034663
FBgn0266100	CG44837	CG44837	2.49466e-05	0.0500352	0.151	0.116	0.0374198
FBgn0052206	CG32206	CG32206	2.61763e-05	0.0845243	0.246	0.185	0.0392645
FBgn0000659	CG10002	fkh	3.18993e-05	0.0951123	0.102	0.069	0.047849
FBgn0264308	CG43778	CG43778	3.4979e-05	0.147518	0.337	0.261	0.0524685
FBgn0267337	CG42277	rn	3.77576e-05	0.0345897	0.109	0.084	0.0566364
FBgn0040397	CG3655	CG3655	3.95781e-05	0.0760188	0.183	0.133	0.0593672
FBgn0014343	CG10601	mirr	4.24733e-05	0.108457	0.198	0.168	0.0637099
FBgn0038980	CG6919	Octbeta1R	4.56904e-05	0.057024	0.153	0.111	0.0685356
FBgn0053696	CG33696	CNMaR	5.10736e-05	0.0718016	0.127	0.092	0.0766104
FBgn0260941	CG42318	app	5.77096e-05	0.111798	0.28	0.219	0.0865643
FBgn0265194	CG44240	Trpm	6.22278e-05	0.0439957	0.124	0.091	0.0933417
FBgn0267001	CG42338	Ten-a	6.38074e-05	1.81694	0.905	0.783	0.0957111
FBgn0037676	CG8861	CG8861	6.38653e-05	0.0882378	0.389	0.342	0.095798
FBgn0003975	CG3830	vg	6.64591e-05	-0.00108427	0.121	0.119	0.0996887
FBgn0034138	CG8332	RpS15	7.59556e-05	0.137804	0.895	0.899	0.113933
FBgn0041097	CG5423	robo3	7.97098e-05	0.0505761	0.186	0.146	0.119565
FBgn0000635	CG3665	Fas2	9.06066e-05	0.358367	0.358	0.223	0.13591
FBgn0030897	CG5744	Frq1	0.000118451	0.963934	0.72	0.56	0.177676
FBgn0264273	CG33960	Sema2b	0.000198255	0.102767	0.276	0.227	0.297382
FBgn0037941	CG12594	CG12594	0.000208003	0.112034	0.281	0.24	0.312005
FBgn0051475	CG31475	CG31475	0.000211401	0.0222322	0.108	0.092	0.317101
FBgn0004885	CG6863	tok	0.000227083	0.00844072	0.141	0.133	0.340625
FBgn0259243	CG42341	Pka-R1	0.000233634	0.0608493	0.322	0.292	0.350451
FBgn0267033	CG45477	mamo	0.000242686	1.25865	0.553	0.404	0.364029
FBgn0052600	CG32600	dpr8	0.000267574	0.240022	0.436	0.341	0.401361
FBgn0066101	CG31094	LpR1	0.000267653	0.103551	0.291	0.24	0.401479
FBgn0010452	CG11280	trn	0.000277038	0.113799	0.176	0.128	0.415557
FBgn0013733	CG18076	shot	0.000308509	0.127206	0.35	0.272	0.462764
FBgn0001085	CG17697	fz	0.000322181	0.0656624	0.22	0.181	0.483272
FBgn0037874	CG4800	Tctp	0.000360034	0.0686792	0.389	0.346	0.54005
FBgn0085412	CG34383	kmr	0.000394611	0.145049	0.333	0.255	0.591917
FBgn0033268	CG2297	Obp44a	0.000437458	0.0919977	0.22	0.162	0.656188
FBgn0263257	CG43395	Cngl	0.000476939	1.25892	0.791	0.655	0.715409
FBgn0052204	CG32204	CG32204	0.00050835	0.0672547	0.145	0.106	0.762524
FBgn0053516	CG33516	dpr3	0.000514921	0.0548889	0.152	0.121	0.772382
FBgn0085385	CG34356	bma	0.000662148	0.0384568	0.138	0.115	0.993223
FBgn0085447	CG34418	sif	0.000686039	1.32553	0.743	0.523	1
FBgn0264975	CG1634	Nrg	0.000743757	0.0640285	0.228	0.182	1
FBgn0051619	CG31619	nolo	0.000861385	0.112292	0.265	0.204	1
FBgn0053147	CG33147	Hs3st-A	0.000892538	0.320943	0.474	0.353	1
FBgn0039420	CG6154	CG6154	0.000949877	0.0431259	0.19	0.167	1
FBgn0039349	CG4685	Ssadh	0.000962969	-0.0253366	0.374	0.403	1
FBgn0261262	CG42613	CG42613	0.000963776	0.813049	0.647	0.473	1
FBgn0261113	CG17836	Xrp1	0.00100279	0.0534446	0.244	0.209	1
FBgn0037015	CG13253	cmpy	0.00100802	0.120834	0.337	0.274	1
FBgn0011666	CG5099	msi	0.00100846	0.735613	0.634	0.434	1
FBgn0000575	CG1007	emc	0.00103891	0.061559	0.24	0.2	1
FBgn0001078	CG4059	ftz-f1	0.00108565	0.111131	0.3	0.237	1
FBgn0039816	CG11317	CG11317	0.00113674	0.0417121	0.159	0.125	1
FBgn0027608	CG2082	CG2082	0.00113899	0.131388	0.342	0.284	1
FBgn0085407	CG34378	Pvf3	0.00123693	0.530031	0.512	0.405	1
FBgn0016061	CG31062	side	0.00126149	0.110458	0.491	0.452	1
FBgn0004198	CG11387	ct	0.00140406	0.660704	0.353	0.234	1
FBgn0270928	CG32848	VAChT	0.0014766	0.125991	0.187	0.116	1
FBgn0036144	CG6207	GlcAT-P	0.00151942	0.159092	0.349	0.279	1
FBgn0033405	CG13954	CG13954	0.00154068	0.134098	0.239	0.164	1
FBgn0267336	CG34360	Glut4EF	0.00158591	0.878282	0.779	0.672	1
FBgn0026160	CG7958	tna	0.00168003	0.334362	0.478	0.345	1
FBgn0027654	CG2239	jdp	0.00170476	0.214283	0.621	0.584	1
FBgn0085382	CG34353	CG34353	0.00174153	0.0885611	0.234	0.181	1
FBgn0011676	CG6713	Nos	0.001803	0.0811258	0.128	0.099	1
FBgn0034978	CG3257	CG3257	0.0020077	0.00957055	0.168	0.169	1
FBgn0085370	CG34341	Pde11	0.0022359	0.0482755	0.162	0.13	1
FBgn0031016	CG12199	kek5	0.00231482	0.0463666	0.139	0.104	1
FBgn0286778	CG46385	CG46385	0.00240599	0.271161	0.463	0.365	1
FBgn0039209	CG13624	REPTOR	0.00248858	0.0965364	0.245	0.185	1
FBgn0033791	CG3915	Drl-2	0.00254694	0.052462	0.149	0.114	1
FBgn0035756	CG32381	unc-13-4A	0.00258595	0.0998827	0.265	0.218	1
FBgn0004449	CG5723	Ten-m	0.00262714	0.174734	0.411	0.336	1
FBgn0260442	CG6831	rhea	0.00265885	0.032889	0.143	0.113	1
FBgn0031835	CG11319	CG11319	0.00269398	0.181984	0.399	0.335	1
FBgn0259212	CG42312	cno	0.00325695	0.0387798	0.125	0.094	1
FBgn0261588	CG42698	pdm3	0.00337017	0.101585	0.244	0.202	1
FBgn0010434	CG11949	cora	0.00347769	0.0524794	0.159	0.116	1
FBgn0013686	CR34094	mt:lrRNA	0.00347926	3.1468	0.902	0.711	1
FBgn0024321	CG8524	NK7.1	0.00351647	0.0620197	0.202	0.162	1
FBgn0000303	CG12345	ChAT	0.00378656	0.0704895	0.155	0.108	1
FBgn0052406	CG32406	PVRAP	0.00385021	0.0368747	0.177	0.153	1
FBgn0264908	CG44099	pHCl-1	0.00389344	0.0930227	0.303	0.247	1
FBgn0261928	CG42795	CG42795	0.00420236	0.170845	0.364	0.278	1
FBgn0085413	CG34384	CG34384	0.004271	0.114244	0.264	0.199	1
FBgn0263930	CG4974	dally	0.00446891	0.16606	0.294	0.204	1
FBgn0263392	CG43444	Tet	0.00459709	0.245754	0.559	0.479	1
FBgn0003165	CG9755	pum	0.00467108	0.723361	0.801	0.686	1
FBgn0260657	CG42540	CG42540	0.00495698	0.378612	0.651	0.589	1
FBgn0028481	CG4341	CG4341	0.00515502	0.0898979	0.26	0.207	1
FBgn0030505	CG11172	NFAT	0.00515901	0.107701	0.329	0.268	1
FBgn0266801	CG45263	CG45263	0.00532154	0.00174522	0.49	0.478	1
FBgn0051774	CG31774	fred	0.00550127	0.0759209	0.238	0.19	1
FBgn0052647	CG32647	CG32647	0.00563462	0.0992895	0.289	0.23	1
FBgn0051760	CG31760	CG31760	0.00567315	0.0688232	0.221	0.184	1
FBgn0003360	CG16944	sesB	0.005936	1.02034	0.904	0.901	1
FBgn0265296	CG42256	Dscam2	0.00604201	0.760278	0.744	0.686	1
FBgn0085420	CG34391	DIP-delta	0.00617224	0.222032	0.333	0.274	1
FBgn0261788	CG42734	Ank2	0.00625515	0.875657	0.805	0.716	1
FBgn0005636	CG3385	nvy	0.00628862	-0.0262405	0.251	0.268	1
FBgn0040726	CG13439	dpr1	0.00635	0.11944	0.363	0.312	1
FBgn0263994	CG43737	CG43737	0.00660103	0.335275	0.565	0.467	1
FBgn0033484	CG2269	CG2269	0.00672168	0.484055	0.793	0.774	1
FBgn0051345	CG31345	CG31345	0.00704906	0.0603743	0.139	0.108	1
FBgn0034753	CG2852	CG2852	0.00706111	-0.0183317	0.505	0.527	1
FBgn0264087	CG43756	Slob	0.00739964	0.0590977	0.197	0.155	1
FBgn0038246	CG14853	CG14853	0.00744883	0.0397442	0.135	0.104	1
FBgn0016797	CG9739	fz2	0.00746317	0.165	0.315	0.246	1
FBgn0266377	CG45019	Pde8	0.00752845	0.0262221	0.127	0.104	1
FBgn0085409	CG34380	smal	0.00757424	0.0790144	0.259	0.211	1
FBgn0005775	CG7503	Con	0.00759707	0.65181	0.496	0.35	1
FBgn0015774	CG10521	NetB	0.00788211	0.164502	0.307	0.244	1
FBgn0031306	CG4577	CG4577	0.00810492	0.189453	0.326	0.269	1
FBgn0267253	CG32700	CG32700	0.00814823	0.154371	0.299	0.23	1
FBgn0002643	CG8118	mam	0.00851945	0.0560736	0.223	0.182	1
FBgn0004858	CG4220	elB	0.00856728	0.0340532	0.203	0.182	1
FBgn0267428	CG45781	DIP-lambda	0.00889252	0.0499919	0.127	0.101	1
FBgn0031897	CG13784	CG13784	0.00908014	0.0437764	0.258	0.226	1
FBgn0031971	CG7224	Sirup	0.00921165	0.0368687	0.2	0.174	1
FBgn0040805	CG12355	CG12355	0.00929831	0.00305339	0.145	0.141	1
FBgn0033403	CG13739	CG13739	0.0102002	0.389811	0.411	0.283	1
FBgn0038653	CG18208	Octalpha2R	0.0102084	0.178812	0.421	0.36	1
FBgn0264339	CG43795	CG43795	0.0104226	-0.0169892	0.208	0.209	1
FBgn0262636	CG2052	dati	0.0111135	0.147494	0.417	0.381	1
FBgn0261999	CG42817	Ca-Ma2d	0.0112513	0.0730097	0.215	0.169	1
FBgn0015400	CG4977	kek2	0.011668	0.106859	0.391	0.341	1
FBgn0040153	CG32597	l(1)G0469	0.0121476	0.0391419	0.111	0.084	1
FBgn0264000	CG43743	GluRIB	0.0140589	0.361433	0.465	0.342	1
FBgn0000636	CG5803	Fas3	0.0151354	0.046765	0.192	0.169	1
FBgn0259170	CG42275	alpha-Man-Ia	0.0162659	0.0610818	0.195	0.154	1
FBgn0015919	CG10605	caup	0.0178636	0.041498	0.127	0.121	1
FBgn0028369	CG3653	kirre	0.0186988	0.16288	0.329	0.251	1
FBgn0017590	CG6669	klg	0.018956	0.0795925	0.545	0.526	1
FBgn0000064	CG6058	Ald1	0.019121	0.107607	0.816	0.812	1
FBgn0035041	CG13594	CG13594	0.0195603	0.0212896	0.136	0.119	1
FBgn0037171	CG14459	CG14459	0.0196484	-0.00947232	0.144	0.147	1
FBgn0041707	CG1168	7B2	0.020115	0.0686901	0.809	0.802	1
FBgn0259244	CG42342	CG42342	0.0207082	0.133393	0.501	0.454	1
FBgn0034408	CG12758	sano	0.0212626	0.0244323	0.115	0.097	1
FBgn0000116	CG32031	Argk	0.0212894	0.429253	0.827	0.801	1
FBgn0052432	CG32432	CG32432	0.0217148	0.0686765	0.249	0.203	1
FBgn0267910	CR34335	lncRNA:CR34335	0.0217822	12.9783	0.986	0.873	1
FBgn0051221	CG31221	CG31221	0.0228743	1.67944	0.647	0.455	1
FBgn0265052	CG44167	St3	0.0230818	0.0287681	0.172	0.144	1
FBgn0259789	CG12701	zld	0.0241379	0.0658952	0.208	0.174	1
FBgn0033438	CG1794	Mmp2	0.0243988	-0.00869365	0.256	0.252	1
FBgn0001297	CG33956	kay	0.0250705	0.0352532	0.125	0.097	1
FBgn0261988	CG17998	Gprk2	0.025624	0.315669	0.469	0.329	1
FBgn0259234	CG42332	Camta	0.0256966	0.0508276	0.206	0.169	1
FBgn0000633	CG17716	CG17716	0.0266098	0.469513	0.471	0.36	1
FBgn0261046	CG31190	Dscam3	0.0268515	0.0337314	0.176	0.154	1
FBgn0028704	CG18660	Nckx30C	0.0291765	0.474515	0.763	0.728	1
FBgn0039054	CG13830	Cow	0.0297427	0.248314	0.543	0.455	1
FBgn0000042	CG4027	Act5C	0.0299168	0.259152	0.742	0.725	1
FBgn0028888	CG4168	CG4168	0.0304847	0.0355835	0.122	0.097	1
FBgn0032797	CG10186	Hasp	0.0313129	0.353958	0.886	0.885	1
FBgn0028645	CG7644	beat-Ib	0.0314203	0.135407	0.348	0.291	1
FBgn0052183	CG32183	Ccn	0.0321563	0.0463511	0.172	0.148	1
FBgn0013973	CG1470	Gycbeta100B	0.0322547	0.0576557	0.194	0.154	1
FBgn0264001	CG43744	bru3	0.0323474	0.808696	0.718	0.64	1
FBgn0010412	CG4464	RpS19a	0.0324224	0.0319672	0.303	0.285	1
FBgn0085380	CG34351	CG34351	0.0348501	0.0223032	0.116	0.094	1
FBgn0020907	CG14904	Scp2	0.0350381	0.124257	0.181	0.15	1
FBgn0019650	CG11186	toy	0.0363969	0.053455	0.229	0.2	1
FBgn0266418	CG45058	wake	0.0369347	0.0259279	0.14	0.116	1
FBgn0053179	CG33179	beat-IIIb	0.0370678	0.0546889	0.292	0.263	1
FBgn0085395	CG34366	Shawl	0.0373765	0.0458487	0.162	0.127	1
FBgn0000037	CG4356	mAChR-A	0.0375563	0.145843	0.46	0.394	1
FBgn0032901	CG9339	sky	0.037838	0.125889	0.478	0.435	1
FBgn0015777	CG9261	nrv2	0.0388916	0.0436161	0.144	0.112	1
FBgn0262018	CG42829	CadN2	0.0416362	0.0468485	0.171	0.136	1
FBgn0085390	CG34361	Dgk	0.042283	0.0314728	0.104	0.08	1
FBgn0261574	CG7749	kug	0.0440154	0.04641	0.177	0.149	1
FBgn0031414	CG33955	eys	0.0455677	0.283301	0.455	0.381	1
FBgn0250910	CG42244	Octbeta3R	0.0484955	0.0407724	0.195	0.163	1
FBgn0261555	CG42673	CG42673	0.04859	0.00314054	0.101	0.096	1
FBgn0013467	CG18285	igl	0.0486324	0.432492	0.567	0.464	1
FBgn0036043	CG8177	CG8177	0.0492199	0.0899919	0.332	0.276	1
FBgn0259111	CG42253	Ndae1	0.0513249	0.0273194	0.139	0.116	1
FBgn0000097	CG3166	aop	0.0557296	0.0698844	0.217	0.173	1
FBgn0003326	CG17579	sca	0.055841	0.0562311	0.166	0.133	1
FBgn0043364	CG4427	cbt	0.0576934	0.0326441	0.13	0.105	1
FBgn0041605	CG32490	cpx	0.0580867	1.3333	0.961	0.95	1
FBgn0038087	CG10134	beat-Va	0.0583168	-0.00234964	0.102	0.101	1
FBgn0083949	CG34113	side-III	0.0584277	0.313596	0.475	0.386	1
FBgn0004369	CG11516	Ptp99A	0.059179	0.622589	0.694	0.561	1
FBgn0033250	CG14762	CG14762	0.0597993	0.08097	0.191	0.144	1
FBgn0040823	CG14162	dpr6	0.0598003	0.0579665	0.322	0.288	1
FBgn0030723	CG14948	dpr18	0.0600546	0.0144266	0.163	0.156	1
FBgn0250908	CG42242	beat-VII	0.0620299	0.110844	0.448	0.415	1
FBgn0023534	CG17778	CG17778	0.0649168	0.0627314	0.219	0.181	1
FBgn0019643	CG3318	AANAT1	0.0652267	-0.0268976	0.198	0.217	1
FBgn0029761	CG10706	SK	0.0669868	0.433359	0.657	0.578	1
FBgn0284243	CG9277	betaTub56D	0.0681329	0.107053	0.494	0.463	1
FBgn0260462	CG12163	CG12163	0.0689142	0.0308021	0.155	0.131	1
FBgn0031770	CG13995	CG13995	0.0696386	0.0320765	0.234	0.219	1
FBgn0053143	CG33143	CG33143	0.0703112	0.0339439	0.27	0.241	1
FBgn0038839	CG10830	Ktl	0.0711888	0.0450411	0.29	0.276	1
FBgn0052677	CG32677	X11Lbeta	0.0717792	0.181472	0.433	0.35	1
FBgn0262782	CG5362	Mdh1	0.0720023	0.00436631	0.245	0.245	1
FBgn0003274	CG4918	RpLP2	0.0724275	0.104658	0.631	0.626	1
FBgn0028370	CG4192	kek3	0.0741457	0.0649524	0.161	0.123	1
FBgn0265597	CG44424	rad	0.0765705	0.379755	0.487	0.419	1
FBgn0038826	CG17838	Syp	0.0781732	0.345167	0.585	0.518	1
FBgn0261258	CG6014	rgn	0.0785917	0.0230795	0.205	0.185	1
FBgn0031697	CG14024	CG14024	0.0788785	0.0107279	0.13	0.12	1
FBgn0050419	CG30419	CG30419	0.0800788	0.0569615	0.185	0.164	1
FBgn0259108	CG34387	futsch	0.0816572	1.92958	0.953	0.918	1
FBgn0028644	CG4838	beat-Ic	0.0827126	0.585868	0.514	0.399	1
FBgn0033108	CG15236	CG15236	0.0874254	0.109392	0.315	0.272	1
FBgn0085421	CG34392	Epac	0.0914116	0.0614181	0.183	0.141	1
FBgn0000179	CG3578	bi	0.0922781	0.199589	0.217	0.174	1
FBgn0010411	CG8900	RpS18	0.0928003	-0.0727667	0.853	0.892	1
FBgn0086758	CG31666	chinmo	0.095031	0.350301	0.717	0.666	1
FBgn0035173	CG13907	CG13907	0.0961376	0.0282272	0.132	0.109	1
FBgn0015399	CG12283	kek1	0.100031	0.226645	0.453	0.375	1
FBgn0261871	CG33507	dpr2	0.100265	0.0274849	0.145	0.123	1
FBgn0004516	CG14994	Gad1	0.106053	1.22031	0.928	0.913	1
FBgn0036927	CG7433	Gabat	0.106381	0.0310447	0.432	0.433	1
FBgn0083950	CG34114	side-VI	0.109194	0.273193	0.426	0.324	1
FBgn0024963	CG7535	GluClalpha	0.109538	0.643241	0.716	0.617	1
FBgn0036165	CG7533	chrb	0.109667	0.539656	0.702	0.613	1
FBgn0265182	CG44247	CG44247	0.110551	0.0503122	0.278	0.25	1
FBgn0011582	CG9652	Dop1R1	0.111005	0.0325122	0.259	0.25	1
FBgn0010114	CG2040	hig	0.11133	0.303508	0.562	0.492	1
FBgn0261552	CG42670	ps	0.111449	0.862172	0.931	0.933	1
FBgn0028875	CG32975	nAChRalpha5	0.117933	0.746169	0.791	0.703	1
FBgn0262737	CG7437	mub	0.118281	0.696517	0.668	0.54	1
FBgn0262738	CG3620	norpA	0.118803	0.145326	0.498	0.468	1
FBgn0051665	CG31665	wry	0.119944	0.370557	0.479	0.372	1
FBgn0010313	CG2530	corto	0.119965	0.155519	0.419	0.352	1
FBgn0033446	CG1648	CG1648	0.12077	0.0545142	0.231	0.199	1
FBgn0039346	CG5079	CG5079	0.121104	-0.00153868	0.101	0.105	1
FBgn0039089	CG10152	beat-IV	0.121606	0.0188522	0.211	0.202	1
FBgn0003380	CG12348	Sh	0.121887	1.73714	0.949	0.921	1
FBgn0052017	CG32017	CG32017	0.123223	0.386916	0.791	0.764	1
FBgn0263397	CG8585	Ih	0.124049	1.44295	0.881	0.807	1
FBgn0259213	CG42313	side-II	0.128734	0.0744844	0.401	0.373	1
FBgn0030412	CG17762	Tomosyn	0.130978	0.41657	0.652	0.539	1
FBgn0285952	CG3186	eEF5	0.1363	0.0482253	0.321	0.302	1
FBgn0013954	CG11001	Fkbp12	0.13852	-0.0204896	0.468	0.477	1
FBgn0266871	CR45332	lncRNA:CR45332	0.142794	-0.0050218	0.155	0.157	1
FBgn0011656	CG1429	Mef2	0.142975	0.0786804	0.243	0.194	1
FBgn0085414	CG34385	dpr12	0.149619	0.1518	0.446	0.383	1
FBgn0264574	CG43946	Glut1	0.153684	0.117901	0.366	0.311	1
FBgn0085383	CG34354	CG34354	0.153877	0.111331	0.307	0.26	1
FBgn0039770	CG15537	CG15537	0.157042	0.168532	0.112	0.099	1
FBgn0029123	CG18024	SoxN	0.15993	0.197339	0.241	0.174	1
FBgn0032400	CG6770	CG6770	0.160414	0.496766	0.725	0.648	1
FBgn0035171	CG12502	CG12502	0.163884	0.00395451	0.111	0.107	1
FBgn0263980	CG43729	Stacl	0.164747	0.130951	0.583	0.551	1
FBgn0001226	CG4466	Hsp27	0.169864	-0.0548212	0.172	0.173	1
FBgn0004244	CG10537	Rdl	0.173216	0.976239	0.954	0.942	1
FBgn0011661	CG10701	Moe	0.176948	0.0308576	0.22	0.206	1
FBgn0013981	CG3379	His4r	0.179173	0.51198	0.953	0.951	1
FBgn0030090	CG12664	fend	0.182265	0.171158	0.513	0.452	1
FBgn0038494	CG4135	beat-IIb	0.192371	0.0342071	0.131	0.107	1
FBgn0037525	CG17816	CG17816	0.194173	0.314745	0.593	0.502	1
FBgn0259821	CG42402	CG42402	0.194495	0.177188	0.376	0.317	1
FBgn0083975	CG34139	Nlg4	0.195933	0.0310459	0.205	0.185	1
FBgn0003091	CG6622	Pkc53E	0.196295	0.468029	0.524	0.378	1
FBgn0260793	CG42573	2mit	0.197207	0.0349305	0.224	0.204	1
FBgn0260660	CG42543	Mp	0.199952	0.125402	0.356	0.311	1
FBgn0264606	CG43955	Fife	0.205789	0.0555831	0.413	0.396	1
FBgn0015229	CG6575	glec	0.208531	0.251666	0.354	0.225	1
FBgn0000422	CG10697	Ddc	0.210644	0.0876698	0.397	0.386	1
FBgn0002868	CG9470	MtnA	0.225218	0.296405	0.291	0.152	1
FBgn0032840	CG13968	sNPF	0.234639	0.151504	0.151	0.126	1
FBgn0036935	CG14186	CG14186	0.240586	0.0228564	0.223	0.208	1
FBgn0003429	CG10693	slo	0.250075	0.478609	0.696	0.619	1
FBgn0005771	CG4491	noc	0.258828	0.00841425	0.156	0.149	1
FBgn0000024	CG17907	Ace	0.272089	0.268649	0.415	0.309	1
FBgn0032151	CG4128	nAChRalpha6	0.276511	1.18221	0.779	0.666	1
FBgn0036381	CG8745	CG8745	0.279971	0.031856	0.108	0.081	1
FBgn0284245	CG8280	eEF1alpha1	0.286358	0.0960452	0.338	0.283	1
FBgn0264503	CG43902	CG43902	0.290189	0.127728	0.263	0.212	1
FBgn0262593	CG43128	Shab	0.293814	0.229848	0.474	0.385	1
FBgn0038321	CG6218	CG6218	0.296955	0.0124785	0.112	0.098	1
FBgn0004509	CG10772	Fur1	0.297535	0.0291586	0.185	0.174	1
FBgn0261836	CG42768	Msp300	0.298753	1.12327	0.857	0.8	1
FBgn0262508	CG43078	CG43078	0.301126	0.00896703	0.114	0.106	1
FBgn0259242	CG42340	CG42340	0.30594	0.0645165	0.249	0.212	1
FBgn0000535	CG10952	eag	0.308258	0.100055	0.328	0.278	1
FBgn0085434	CG34405	NaCP60E	0.315804	0.605993	0.718	0.628	1
FBgn0041094	CG7590	scyl	0.327421	0.169117	0.437	0.369	1
FBgn0260943	CG32169	Rbp6	0.333685	2.70864	0.936	0.887	1
FBgn0037913	CG6783	fabp	0.335938	0.0294143	0.172	0.144	1
FBgn0029814	CG15765	CG15765	0.336126	0.228955	0.482	0.415	1
FBgn0004880	CG1130	scrt	0.348894	0.52353	0.875	0.861	1
FBgn0023095	CG11282	caps	0.352207	0.0341993	0.165	0.147	1
FBgn0030174	CG15312	CG15312	0.353991	0.0641754	0.278	0.244	1
FBgn0011828	CG12002	Pxn	0.354126	0.0151587	0.101	0.087	1
FBgn0033192	CG2105	Corin	0.362756	0.231453	0.54	0.489	1
FBgn0261549	CG42667	rdgA	0.366158	0.132755	0.296	0.236	1
FBgn0010415	CG10497	Sdc	0.371135	0.223262	0.674	0.623	1
FBgn0263995	CG43738	cpo	0.371219	0.405655	0.655	0.55	1
FBgn0035499	CG14996	Chd64	0.37962	0.022882	0.146	0.129	1
FBgn0265002	CG44153	CG44153	0.385414	0.00365282	0.219	0.22	1
FBgn0039584	CG14064	beat-VI	0.386086	0.0701921	0.287	0.253	1
FBgn0003435	CG9218	sm	0.387697	1.3151	0.909	0.886	1
FBgn0264386	CG15899	Ca-alpha1T	0.390011	0.602034	0.525	0.416	1
FBgn0002593	CG4087	RpLP1	0.399995	0.0876373	0.76	0.776	1
FBgn0011224	CG31000	heph	0.401342	0.795875	0.539	0.43	1
FBgn0259171	CG42276	Pde9	0.406029	0.263704	0.543	0.482	1
FBgn0001233	CG1242	Hsp83	0.40652	0.123763	0.702	0.685	1
FBgn0243512	CG7850	puc	0.408017	0.0238669	0.134	0.123	1
FBgn0027598	CG31012	cindr	0.415212	0.494119	0.618	0.477	1
FBgn0013433	CG4846	beat-Ia	0.42087	0.0339119	0.175	0.154	1
FBgn0010113	CG15532	hdc	0.421248	0.864847	0.705	0.573	1
FBgn0261089	CG5559	Sytalpha	0.427418	0.00519925	0.114	0.109	1
FBgn0003423	CG1417	slgA	0.428832	0.375079	0.775	0.73	1
FBgn0015609	CG7100	CadN	0.433636	0.205213	0.513	0.444	1
FBgn0261804	CG42750	CG42750	0.435777	0.110767	0.392	0.344	1
FBgn0267579	CR45919	lncRNA:CR45919	0.442432	0.0203661	0.119	0.105	1
FBgn0264006	CG43749	dysc	0.445049	0.458784	0.781	0.729	1
FBgn0013576	CG32464	mtd	0.448685	0.742614	0.84	0.795	1
FBgn0053543	CG33543	CG33543	0.453092	0.332291	0.431	0.366	1
FBgn0264490	CG18389	Eip93F	0.457285	0.268136	0.314	0.235	1
FBgn0052264	CG32264	CG32264	0.457777	0.789631	0.813	0.735	1
FBgn0010300	CG10719	brat	0.45886	0.181757	0.345	0.265	1
FBgn0014163	CG4609	fax	0.466021	0.800908	0.663	0.475	1
FBgn0086778	CG32538	nAChRalpha7	0.470067	0.436473	0.637	0.554	1
FBgn0034725	CG6044	CG6044	0.489375	-0.0456556	0.488	0.502	1
FBgn0266851	CR45312	lncRNA:CR45312	0.507401	-0.0138133	0.223	0.231	1
FBgn0004242	CG3139	Syt1	0.512951	0.986896	0.895	0.877	1
FBgn0039380	CG5890	CG5890	0.516093	0.0483286	0.241	0.221	1
FBgn0031632	CG15628	CG15628	0.516228	0.156291	0.545	0.511	1
FBgn0263220	CG43388	Hk	0.523599	0.537985	0.756	0.673	1
FBgn0267668	CR46006	lncRNA:CR46006	0.527366	0.0389188	0.13	0.108	1
FBgn0030574	CG9413	sbm	0.528151	0.0422181	0.218	0.19	1
FBgn0038498	CG14334	beat-IIa	0.530691	0.185801	0.321	0.263	1
FBgn0001225	CG4183	Hsp26	0.532566	-0.0571439	0.192	0.194	1
FBgn0265487	CG33197	mbl	0.541887	1.0663	0.709	0.643	1
FBgn0261597	CG10305	RpS26	0.543975	0.118215	0.803	0.816	1
FBgn0031374	CG7337	Wdr62	0.547177	0.279461	0.486	0.399	1
FBgn0033196	CG1358	CG1358	0.563317	0.0303881	0.112	0.091	1
FBgn0038282	CG33485	dpr9	0.566541	0.33966	0.449	0.365	1
FBgn0086677	CG30040	jeb	0.57151	0.461709	0.519	0.4	1
FBgn0085432	CG34403	pan	0.572837	0.5304	0.727	0.609	1
FBgn0028496	CG30116	CG30116	0.584749	0.105865	0.353	0.308	1
FBgn0032833	CG10664	COX4	0.590377	-0.145181	0.846	0.881	1
FBgn0035816	CG13685	CG13685	0.59373	0.0243566	0.155	0.137	1
FBgn0004514	CG7485	Oct-TyrR	0.603841	0.0286328	0.153	0.136	1
FBgn0035170	CG12191	dpr20	0.605479	0.00455612	0.108	0.107	1
FBgn0052506	CG32506	CG32506	0.609765	0.0435255	0.239	0.214	1
FBgn0036494	CG7250	Toll-6	0.618738	0.351417	0.442	0.347	1
FBgn0085400	CG34371	side-V	0.626671	0.029238	0.188	0.169	1
FBgn0014184	CG16747	Oda	0.637996	0.454187	0.736	0.676	1
FBgn0031736	CG11030	CG11030	0.643077	0.079574	0.298	0.266	1
FBgn0263289	CG43398	scrib	0.643867	0.0129136	0.156	0.144	1
FBgn0039064	CG4467	CG4467	0.651644	0.295291	0.498	0.379	1
FBgn0053202	CG33202	dpr11	0.665663	0.0356231	0.276	0.261	1
FBgn0004611	CG4574	Plc21C	0.679433	0.149807	0.445	0.4	1
FBgn0085391	CG34362	trv	0.691982	0.76227	0.626	0.51	1
FBgn0264815	CG44007	Pde1c	0.693623	0.109449	0.342	0.305	1
FBgn0085387	CG34358	shakB	0.695324	0.295688	0.596	0.526	1
FBgn0035092	CG3441	Nplp1	0.699797	0.0958444	0.279	0.257	1
FBgn0052062	CG32062	Rbfox1	0.711035	1.11845	0.879	0.794	1
FBgn0263353	CG11000	CG11000	0.712064	0.234632	0.541	0.455	1
FBgn0037521	CG2993	CG2993	0.716392	0.0642158	0.328	0.294	1
FBgn0034731	CG10384	CG10384	0.718993	0.0264682	0.156	0.135	1
FBgn0000273	CG4379	Pka-C1	0.728785	0.407335	0.619	0.52	1
FBgn0038063	CG33976	Octbeta2R	0.732288	0.237386	0.429	0.331	1
FBgn0261244	CG33174	inaE	0.740767	0.207857	0.453	0.37	1
FBgn0027589	CG1688	CG1688	0.747087	0.0363736	0.165	0.158	1
FBgn0038156	CG14372	side-IV	0.758816	0.0156423	0.108	0.098	1
FBgn0024841	CG1963	Pcd	0.762027	0.0402522	0.22	0.196	1
FBgn0033544	CG7220	CG7220	0.76486	0.00332427	0.215	0.21	1
FBgn0262869	CG43224	Gfrl	0.778196	0.174669	0.437	0.381	1
FBgn0039617	CG14521	DIP-gamma	0.787107	0.0324158	0.233	0.213	1
FBgn0044328	CG32052	CG32052	0.791045	0.0599029	0.253	0.229	1
FBgn0035032	CG4692	ATPsynF	0.804661	0.159196	0.852	0.858	1
FBgn0050089	CG30089	CG30089	0.811673	0.00965168	0.126	0.119	1
FBgn0022382	CG15862	Pka-R2	0.844814	0.192314	0.379	0.287	1
FBgn0261556	CG42674	CG42674	0.847694	0.0820679	0.322	0.305	1
FBgn0039647	CG14509	jus	0.851367	0.136798	0.402	0.343	1
FBgn0083963	CG34127	Nlg3	0.856195	0.188832	0.55	0.484	1
FBgn0066084	CG30425	RpL41	0.863034	2.90588	0.895	0.68	1
FBgn0285944	CG9907	para	0.866221	1.21328	0.882	0.819	1
FBgn0285948	CG15442	RpL27A	0.883897	0.125674	0.755	0.768	1
FBgn0266137	CG18741	Dop1R2	0.884871	0.0165839	0.127	0.116	1
FBgn0023179	CG6438	amon	0.900992	0.18515	0.398	0.327	1
FBgn0083991	CG34155	CG34155	0.909926	0.0242701	0.154	0.14	1
FBgn0038237	CG8279	Pde6	0.929994	0.314243	0.526	0.438	1
FBgn0036844	CG14080	Mkp3	0.93417	0.283345	0.504	0.404	1
FBgn0000036	CG5610	nAChRalpha1	0.950264	0.168079	0.458	0.403	1
FBgn0000108	CG7727	Appl	0.951523	0.975452	0.856	0.814	1
FBgn0010473	CG15427	tutl	0.952822	0.419532	0.677	0.61	1
FBgn0010263	CG3151	Rbp9	0.954475	0.323382	0.553	0.466	1
FBgn0262509	CG43079	nrm	0.973407	0.0501978	0.227	0.2	1
FBgn0001091	CG12055	Gapdh1	0.976263	0.0395592	0.457	0.449	1
FBgn0027339	CG11352	jim	0.988493	1.93797	0.934	0.912	1
FBgn0265598	CG44425	Bx	0.990615	0.110132	0.323	0.306	1
FBgn0000114	CG31762	bru1	0.999538	0.0143333	0.106	0.094	1

## Sheet: Global_C2
FlyBaseID	GeneID	Gene symbol	p_val	avg_diff	pct.1	pct.2	p_val_adj
FBgn0019660	CR32665	lncRNA:roX2	0	-2.04855	0.007	0.723	0
FBgn0004047	CG11129	Yp3	7.55723e-177	0.129747	0.111	0.003	1.13358e-173
FBgn0058469	CR40469	lncRNA:CR40469	2.96765e-64	0.113774	0.161	0.067	4.45148e-61
FBgn0087002	CG11064	apolpp	2.4507e-59	0.112278	0.144	0.058	3.67605e-56
FBgn0050115	CG30115	GEFmeso	5.22801e-47	0.094443	0.149	0.075	7.84201e-44
FBgn0029768	CG16752	SPR	4.97446e-39	0.313933	0.285	0.142	7.4617e-36
FBgn0260429	CG42524	CG42524	4.68574e-37	0.107723	0.196	0.116	7.02861e-34
FBgn0002543	CG5481	robo2	1.29248e-36	0.172969	0.205	0.11	1.93872e-33
FBgn0052683	CG32683	CG32683	2.35109e-36	0.21658	0.304	0.176	3.52663e-33
FBgn0033987	CG12424	ckn	2.84052e-36	0.0819176	0.204	0.135	4.26078e-33
FBgn0052982	CG32982	CG32982	5.28026e-34	0.190484	0.247	0.137	7.92039e-31
FBgn0019662	CG8593	qm	5.87601e-34	0.0966076	0.195	0.12	8.81401e-31
FBgn0052057	CG32057	dpr10	2.09974e-33	0.187993	0.261	0.152	3.14961e-30
FBgn0250867	CG42238	CG42238	1.02377e-31	0.155548	0.268	0.151	1.53566e-28
FBgn0267431	CG45784	Myo81F	3.20527e-31	0.0881238	0.153	0.088	4.80791e-28
FBgn0285926	CG1691	Imp	3.52772e-30	0.645082	0.381	0.218	5.29159e-27
FBgn0260971	CG42594	CG42594	2.58499e-29	0.339468	0.369	0.205	3.87749e-26
FBgn0052066	CG32066	CG32066	1.30217e-27	0.0929225	0.192	0.12	1.95325e-24
FBgn0037963	CG6977	Cad87A	3.43941e-27	0.0889151	0.159	0.094	5.15912e-24
FBgn0261260	CG42611	mgl	6.96938e-27	0.114716	0.223	0.142	1.04541e-23
FBgn0259677	CG42346	CG42346	2.26007e-26	0.120733	0.209	0.128	3.3901e-23
FBgn0004573	CG12073	5-HT7	1.44813e-25	0.0754374	0.178	0.123	2.1722e-22
FBgn0087012	CG1056	5-HT2A	1.54846e-24	0.110584	0.158	0.087	2.32269e-21
FBgn0004619	CG8442	GluRIA	2.57767e-24	0.322627	0.371	0.233	3.86651e-21
FBgn0267322	CR45758	lncRNA:CR45758	2.75604e-24	0.1068	0.223	0.147	4.13406e-21
FBgn0264090	CG43759	CG43759	3.19197e-24	0.219894	0.3	0.197	4.78795e-21
FBgn0013718	CG33991	nuf	8.31475e-24	0.0496427	0.138	0.095	1.24721e-20
FBgn0020621	CG2049	Pkn	1.2973e-23	0.075344	0.152	0.088	1.94595e-20
FBgn0038641	CG7708	ChT	2.48595e-23	0.146573	0.364	0.273	3.72893e-20
FBgn0031299	CG4629	CG4629	3.59261e-23	0.0868581	0.18	0.119	5.38891e-20
FBgn0033159	CG17800	Dscam1	1.36049e-22	0.121937	0.303	0.228	2.04073e-19
FBgn0013995	CG5685	Calx	3.94993e-22	0.295643	0.368	0.235	5.92489e-19
FBgn0001234	CR31400	lncRNA:Hsromega	5.31739e-22	3.29867	0.992	0.994	7.97609e-19
FBgn0036789	CG13702	AstC-R2	2.03464e-21	0.186139	0.213	0.13	3.05196e-18
FBgn0051690	CG31690	CG31690	2.55926e-21	0.19422	0.313	0.205	3.83889e-18
FBgn0052521	CG32521	CG32521	3.76648e-21	0.0839631	0.153	0.092	5.64972e-18
FBgn0083228	CG5907	Frq2	4.71663e-21	0.462744	0.505	0.341	7.07495e-18
FBgn0262473	CG5490	Tl	5.91864e-21	0.0866567	0.176	0.11	8.87796e-18
FBgn0000547	CG12676	ed	6.22955e-21	0.200178	0.301	0.192	9.34433e-18
FBgn0283651	CG46301	CG46301	8.33375e-21	0.169023	0.284	0.195	1.25006e-17
FBgn0003301	CG9533	rut	9.66118e-20	0.137429	0.27	0.172	1.44918e-16
FBgn0031738	CG9171	CG9171	2.07437e-19	0.0802129	0.164	0.096	3.11155e-16
FBgn0264753	CG44011	Rgk1	3.42036e-19	0.136457	0.189	0.108	5.13054e-16
FBgn0040877	CG12994	CG12994	4.5698e-19	0.0731884	0.117	0.066	6.8547e-16
FBgn0004607	CG1449	zfh2	6.97787e-19	0.202041	0.188	0.107	1.04668e-15
FBgn0004882	CG10868	orb	1.15299e-18	0.0598848	0.123	0.073	1.72948e-15
FBgn0004395	CG4620	unk	7.65822e-18	0.118318	0.236	0.156	1.14873e-14
FBgn0085426	CG34397	Rgk3	3.4037e-17	0.0869621	0.154	0.101	5.10555e-14
FBgn0030158	CG9686	CG9686	8.82589e-17	0.0595015	0.119	0.074	1.32388e-13
FBgn0051324	CG31324	CG31324	9.51775e-17	0.13743	0.232	0.141	1.42766e-13
FBgn0285963	CG46339	CG46339	1.47651e-16	0.0629538	0.185	0.135	2.21477e-13
FBgn0283499	CG18402	InR	2.20116e-16	0.110971	0.272	0.198	3.30174e-13
FBgn0002940	CG4550	ninaE	9.20037e-16	-0.170625	0.116	0.194	1.38006e-12
FBgn0086604	CG12484	side-VIII	1.14473e-15	0.171086	0.294	0.21	1.71709e-12
FBgn0259170	CG42275	alpha-Man-Ia	1.25731e-15	0.0868007	0.231	0.166	1.88596e-12
FBgn0085385	CG34356	bma	1.45849e-15	0.192307	0.377	0.292	2.18773e-12
FBgn0053639	CG33639	CG33639	1.73113e-15	0.0489918	0.117	0.076	2.5967e-12
FBgn0011818	CG9884	oaf	4.35502e-15	0.075145	0.176	0.122	6.53253e-12
FBgn0066101	CG31094	LpR1	4.43652e-15	0.120862	0.266	0.192	6.65478e-12
FBgn0266429	CG2872	AstA-R1	4.70368e-15	0.0520182	0.109	0.067	7.05552e-12
FBgn0002945	CG11614	nkd	7.99717e-15	0.225867	0.359	0.245	1.19958e-11
FBgn0000567	CG32180	Eip74EF	1.00049e-14	0.0536685	0.114	0.066	1.50073e-11
FBgn0263773	CG43690	fok	5.87118e-14	0.106995	0.249	0.173	8.80677e-11
FBgn0050463	CG30463	Pgant9	9.55791e-14	0.178155	0.296	0.196	1.43369e-10
FBgn0263706	CG43658	CG43658	1.23397e-13	0.14465	0.234	0.148	1.85096e-10
FBgn0261090	CG42333	Sytbeta	1.32659e-13	0.100942	0.26	0.198	1.98989e-10
FBgn0261649	CG31247	tinc	2.14225e-13	0.0595521	0.154	0.103	3.21338e-10
FBgn0085397	CG34368	Fili	2.18617e-13	0.0749216	0.142	0.092	3.27925e-10
FBgn0031530	CG3254	Pgant2	3.03662e-13	0.131348	0.213	0.141	4.55493e-10
FBgn0262614	CG43140	pyd	3.59788e-13	0.164968	0.26	0.182	5.39682e-10
FBgn0051814	CG31814	DIP-kappa	6.3367e-13	0.120239	0.167	0.11	9.50505e-10
FBgn0085399	CG34370	CG34370	7.40781e-13	0.069286	0.157	0.104	1.11117e-09
FBgn0028888	CG4168	CG4168	8.1033e-13	0.0496777	0.157	0.111	1.21549e-09
FBgn0050361	CG30361	mtt	1.1276e-12	0.0750956	0.17	0.121	1.69141e-09
FBgn0051191	CG31191	CG31191	1.20635e-12	0.0502235	0.15	0.109	1.80953e-09
FBgn0004652	CG14307	fru	2.62187e-12	0.370893	0.335	0.178	3.93281e-09
FBgn0038246	CG14853	CG14853	3.14594e-12	0.0489823	0.196	0.156	4.71891e-09
FBgn0052626	CG32626	AMPdeam	3.20199e-12	0.0735271	0.209	0.155	4.80299e-09
FBgn0267033	CG45477	mamo	4.57302e-12	1.49234	0.548	0.377	6.85953e-09
FBgn0033405	CG13954	CG13954	4.84828e-12	0.183506	0.327	0.233	7.27242e-09
FBgn0264308	CG43778	CG43778	1.03767e-11	0.140277	0.315	0.223	1.55651e-08
FBgn0041097	CG5423	robo3	1.88349e-11	0.0613957	0.198	0.149	2.82524e-08
FBgn0029824	CG3726	CG3726	2.30138e-11	0.135651	0.218	0.134	3.45207e-08
FBgn0034897	CG11299	Sesn	2.40366e-11	0.0533565	0.116	0.081	3.60549e-08
FBgn0029939	CG9650	CG9650	4.87421e-11	0.210482	0.166	0.098	7.31131e-08
FBgn0040765	CG33473	luna	5.24954e-11	0.384363	0.44	0.298	7.8743e-08
FBgn0053087	CG33087	LRP1	5.35565e-11	0.0528757	0.133	0.091	8.03347e-08
FBgn0260941	CG42318	app	5.58935e-11	0.102632	0.208	0.135	8.38402e-08
FBgn0052698	CG32698	CARPB	5.60366e-11	0.143588	0.165	0.109	8.40549e-08
FBgn0030913	CG6123	CG6123	5.70822e-11	0.271968	0.404	0.308	8.56234e-08
FBgn0020269	CG10145	mspo	6.64996e-11	0.160141	0.305	0.223	9.97494e-08
FBgn0033368	CG13743	CG13743	6.9283e-11	0.107281	0.262	0.195	1.03924e-07
FBgn0038542	CG7431	TyrR	1.25554e-10	0.0554485	0.121	0.086	1.88332e-07
FBgn0051760	CG31760	CG31760	1.37087e-10	0.123895	0.266	0.192	2.05631e-07
FBgn0013688	CR34096	mt:srRNA	1.37908e-10	0.0554641	0.135	0.089	2.06862e-07
FBgn0051092	CG31092	LpR2	1.67961e-10	0.053945	0.151	0.111	2.51942e-07
FBgn0036801	CG6896	MYPT-75D	1.73416e-10	0.150221	0.315	0.244	2.60124e-07
FBgn0042696	CG2380	NfI	2.53726e-10	0.0842318	0.2	0.137	3.8059e-07
FBgn0040153	CG32597	l(1)G0469	2.84714e-10	0.0370799	0.117	0.086	4.27071e-07
FBgn0024321	CG8524	NK7.1	3.03216e-10	0.0733021	0.238	0.185	4.54824e-07
FBgn0085382	CG34353	CG34353	3.10364e-10	0.136122	0.306	0.221	4.65546e-07
FBgn0261285	CG5629	Ppcs	3.48713e-10	0.134114	0.269	0.191	5.2307e-07
FBgn0085390	CG34361	Dgk	4.93812e-10	0.0474039	0.121	0.078	7.40718e-07
FBgn0004595	CG17228	pros	5.55286e-10	3.97038	0.851	0.84	8.3293e-07
FBgn0023095	CG11282	caps	1.03531e-09	0.0595258	0.198	0.147	1.55297e-06
FBgn0027356	CG8604	Amph	1.13674e-09	0.0608826	0.181	0.131	1.70511e-06
FBgn0025525	CG9102	bab2	1.3259e-09	0.0622821	0.145	0.109	1.98885e-06
FBgn0001085	CG17697	fz	1.82777e-09	0.0968438	0.237	0.177	2.74166e-06
FBgn0267579	CR45919	lncRNA:CR45919	2.22805e-09	0.0309737	0.164	0.136	3.34208e-06
FBgn0085420	CG34391	DIP-delta	2.32174e-09	0.142349	0.282	0.218	3.48261e-06
FBgn0051163	CG31163	SKIP	3.18041e-09	0.305606	0.409	0.295	4.77061e-06
FBgn0001078	CG4059	ftz-f1	4.70927e-09	0.1148	0.281	0.197	7.06391e-06
FBgn0019985	CG11144	mGluR	5.1253e-09	0.179933	0.355	0.279	7.68794e-06
FBgn0259212	CG42312	cno	5.76755e-09	0.0431195	0.14	0.103	8.65133e-06
FBgn0263219	CG42330	Dscam4	6.8495e-09	0.150273	0.309	0.226	1.02743e-05
FBgn0030272	CG15201	CG15201	9.29153e-09	0.0761924	0.159	0.112	1.39373e-05
FBgn0010452	CG11280	trn	1.14134e-08	0.147343	0.243	0.176	1.71201e-05
FBgn0086680	CG10037	vvl	1.24302e-08	0.248703	0.181	0.123	1.86453e-05
FBgn0260003	CG34157	Dys	1.27463e-08	0.0734283	0.21	0.157	1.91195e-05
FBgn0035173	CG13907	CG13907	1.36248e-08	0.0348151	0.108	0.078	2.04373e-05
FBgn0028370	CG4192	kek3	1.37407e-08	0.0537656	0.159	0.12	2.0611e-05
FBgn0052204	CG32204	CG32204	1.59101e-08	0.0623289	0.151	0.106	2.38651e-05
FBgn0015777	CG9261	nrv2	1.81351e-08	0.0467461	0.17	0.137	2.72026e-05
FBgn0039209	CG13624	REPTOR	1.87558e-08	0.119115	0.28	0.201	2.81336e-05
FBgn0264273	CG33960	Sema2b	1.89369e-08	0.142502	0.312	0.249	2.84053e-05
FBgn0000659	CG10002	fkh	3.10068e-08	0.0839201	0.113	0.083	4.65102e-05
FBgn0003499	CG7847	sr	3.19066e-08	0.106257	0.283	0.233	4.78599e-05
FBgn0040532	CG8369	CG8369	3.54819e-08	0.100685	0.2	0.142	5.32229e-05
FBgn0000037	CG4356	mAChR-A	3.97641e-08	0.17592	0.52	0.429	5.96462e-05
FBgn0004168	CG16720	5-HT1A	4.87246e-08	0.185647	0.303	0.218	7.30869e-05
FBgn0085753	CR40596	28SrRNA-Psi:CR40596	5.765e-08	0.05986	0.15	0.1	8.64749e-05
FBgn0015519	CG2302	nAChRalpha3	6.11346e-08	0.156406	0.304	0.212	9.17019e-05
FBgn0010300	CG10719	brat	6.55914e-08	0.321214	0.523	0.409	9.83872e-05
FBgn0037521	CG2993	CG2993	7.68132e-08	0.116504	0.407	0.337	0.00011522
FBgn0038980	CG6919	Octbeta1R	9.21887e-08	0.0730176	0.212	0.158	0.000138283
FBgn0051475	CG31475	CG31475	9.53054e-08	0.0376633	0.129	0.099	0.000142958
FBgn0260658	CG42541	CG42541	1.27483e-07	-0.0641772	0.623	0.603	0.000191224
FBgn0264794	CR44024	lncRNA:CR44024	1.29457e-07	0.101884	0.296	0.252	0.000194186
FBgn0015774	CG10521	NetB	1.33656e-07	0.231539	0.331	0.245	0.000200484
FBgn0267910	CR34335	lncRNA:CR34335	1.58859e-07	13.4949	0.989	0.913	0.000238289
FBgn0051361	CG31361	dpr17	1.68248e-07	0.104994	0.209	0.149	0.000252372
FBgn0261046	CG31190	Dscam3	1.83764e-07	0.0500215	0.241	0.214	0.000275646
FBgn0052206	CG32206	CG32206	1.855e-07	0.107469	0.304	0.235	0.00027825
FBgn0259216	CG42316	RhoGAP102A	2.38354e-07	-0.0103101	0.112	0.124	0.000357531
FBgn0259234	CG42332	Camta	2.55929e-07	0.0704539	0.222	0.169	0.000383893
FBgn0028369	CG3653	kirre	2.8531e-07	0.229816	0.399	0.291	0.000427965
FBgn0085412	CG34383	kmr	4.85089e-07	0.113324	0.305	0.238	0.000727633
FBgn0021764	CG5227	sdk	4.96011e-07	0.0641742	0.125	0.084	0.000744016
FBgn0024189	CG33141	sns	6.0212e-07	0.0452596	0.169	0.131	0.00090318
FBgn0085384	CG34355	CG34355	7.38737e-07	0.0981225	0.216	0.156	0.00110811
FBgn0065099	CR33925	snRNA:7SK	7.55732e-07	1.24205	0.805	0.698	0.0011336
FBgn0283451	CG11491	br	8.15804e-07	0.0942335	0.196	0.157	0.00122371
FBgn0002643	CG8118	mam	8.64657e-07	0.0970048	0.268	0.21	0.00129699
FBgn0085409	CG34380	smal	9.1106e-07	0.0974931	0.314	0.254	0.00136659
FBgn0031736	CG11030	CG11030	1.09204e-06	0.0647711	0.278	0.242	0.00163807
FBgn0262636	CG2052	dati	1.11855e-06	0.111375	0.387	0.363	0.00167783
FBgn0265194	CG44240	Trpm	1.17084e-06	0.0493697	0.155	0.117	0.00175626
FBgn0001224	CG4463	Hsp23	1.2898e-06	-0.0563514	0.248	0.232	0.0019347
FBgn0035041	CG13594	CG13594	1.47834e-06	0.0356088	0.147	0.117	0.0022175
FBgn0033403	CG13739	CG13739	1.56715e-06	0.337244	0.355	0.217	0.00235073
FBgn0264000	CG43743	GluRIB	1.62446e-06	0.43434	0.469	0.327	0.00243668
FBgn0037941	CG12594	CG12594	1.70827e-06	0.0971284	0.203	0.155	0.0025624
FBgn0086359	CG3953	Invadolysin	2.53599e-06	0.063181	0.221	0.176	0.00380399
FBgn0031294	CG31795	IA-2	2.6027e-06	7.4339	0.994	0.993	0.00390405
FBgn0050419	CG30419	CG30419	2.87378e-06	0.0525713	0.18	0.149	0.00431067
FBgn0053517	CG33517	Dop2R	3.95506e-06	1.81049	0.91	0.887	0.00593259
FBgn0024944	CG3856	Oamb	4.10723e-06	0.048151	0.122	0.087	0.00616085
FBgn0053696	CG33696	CNMaR	4.17811e-06	0.0805727	0.143	0.106	0.00626716
FBgn0261698	CG42732	SLO2	4.35174e-06	0.127529	0.305	0.238	0.00652761
FBgn0266377	CG45019	Pde8	4.383e-06	0.0583823	0.205	0.162	0.0065745
FBgn0001297	CG33956	kay	4.4693e-06	0.0277956	0.115	0.092	0.00670394
FBgn0010434	CG11949	cora	4.5719e-06	0.0485664	0.229	0.196	0.00685784
FBgn0030574	CG9413	sbm	4.78927e-06	0.078604	0.207	0.149	0.0071839
FBgn0030505	CG11172	NFAT	6.58786e-06	0.219131	0.452	0.347	0.00988179
FBgn0031897	CG13784	CG13784	6.84544e-06	0.0564704	0.29	0.248	0.0102682
FBgn0267253	CG32700	CG32700	7.34597e-06	0.272354	0.415	0.323	0.0110189
FBgn0013733	CG18076	shot	8.42143e-06	0.126456	0.355	0.278	0.0126321
FBgn0011661	CG10701	Moe	9.08143e-06	0.0856061	0.303	0.243	0.0136222
FBgn0037015	CG13253	cmpy	1.17178e-05	0.162942	0.365	0.282	0.0175768
FBgn0040397	CG3655	CG3655	1.24163e-05	0.0731568	0.189	0.146	0.0186245
FBgn0051721	CG31721	Trim9	1.47137e-05	0.0329282	0.128	0.099	0.0220705
FBgn0261113	CG17836	Xrp1	1.70952e-05	0.0756344	0.284	0.232	0.0256428
FBgn0035495	CG14989	CG14989	1.72632e-05	0.466989	0.339	0.282	0.0258948
FBgn0033446	CG1648	CG1648	2.23328e-05	0.0382552	0.248	0.22	0.0334991
FBgn0052406	CG32406	PVRAP	2.25869e-05	0.0491319	0.149	0.113	0.0338803
FBgn0034753	CG2852	CG2852	2.28742e-05	-0.0535905	0.549	0.572	0.0343113
FBgn0032666	CG5758	CG5758	2.7268e-05	0.195315	0.35	0.258	0.040902
FBgn0265052	CG44167	St3	3.06903e-05	0.0572204	0.256	0.211	0.0460354
FBgn0037475	CG33323	Fer1	3.11295e-05	0.00317073	0.112	0.102	0.0466943
FBgn0261258	CG6014	rgn	3.35215e-05	0.0366643	0.277	0.248	0.0502822
FBgn0263131	CG43373	CG43373	3.52048e-05	0.0200289	0.113	0.094	0.0528072
FBgn0000042	CG4027	Act5C	3.80614e-05	0.279553	0.824	0.814	0.057092
FBgn0261988	CG17998	Gprk2	4.37836e-05	0.342532	0.487	0.352	0.0656755
FBgn0011224	CG31000	heph	4.39313e-05	2.27457	0.8	0.729	0.065897
FBgn0016797	CG9739	fz2	4.61198e-05	0.121908	0.305	0.238	0.0691797
FBgn0011656	CG1429	Mef2	5.38775e-05	0.169029	0.329	0.232	0.0808163
FBgn0243512	CG7850	puc	5.526e-05	0.0370525	0.141	0.112	0.0828901
FBgn0051774	CG31774	fred	5.60983e-05	0.0829983	0.25	0.197	0.0841474
FBgn0263772	CG43689	CG43689	6.17796e-05	0.173623	0.133	0.101	0.0926694
FBgn0025382	CG14791	Rab27	6.26421e-05	0.0152454	0.18	0.176	0.0939632
FBgn0052183	CG32183	Ccn	6.87362e-05	0.08491	0.204	0.157	0.103104
FBgn0026428	CG6170	HDAC6	8.10074e-05	0.015529	0.121	0.104	0.121511
FBgn0000121	CG5962	Arr2	8.3851e-05	-0.0705036	0.114	0.139	0.125776
FBgn0260442	CG6831	rhea	8.75866e-05	0.0464785	0.162	0.123	0.13138
FBgn0264895	CG44086	RapGAP1	9.07415e-05	0.441392	0.501	0.405	0.136112
FBgn0026411	CG11354	Lim1	9.22856e-05	0.361449	0.307	0.247	0.138428
FBgn0265595	CG44422	CG44422	9.36461e-05	0.257019	0.357	0.244	0.140469
FBgn0259111	CG42253	Ndae1	0.000102474	0.0533485	0.177	0.139	0.15371
FBgn0037153	CG12673	olf413	0.000103273	0.167133	0.367	0.294	0.15491
FBgn0029663	CG10804	CG10804	0.000110844	0.139855	0.252	0.165	0.166266
FBgn0085407	CG34378	Pvf3	0.000113136	0.516568	0.547	0.437	0.169704
FBgn0031016	CG12199	kek5	0.000113383	0.0348137	0.13	0.103	0.170075
FBgn0031971	CG7224	Sirup	0.000116343	0.0462991	0.168	0.133	0.174514
FBgn0264975	CG1634	Nrg	0.000156074	0.0958496	0.262	0.205	0.234111
FBgn0250910	CG42244	Octbeta3R	0.000168294	0.0179118	0.179	0.164	0.252441
FBgn0051646	CG31646	DIP-theta	0.000175104	0.135513	0.219	0.175	0.262656
FBgn0010412	CG4464	RpS19a	0.000186094	0.0591938	0.316	0.276	0.279141
FBgn0264386	CG15899	Ca-alpha1T	0.00018883	0.976753	0.689	0.574	0.283245
FBgn0015229	CG6575	glec	0.000200757	0.323693	0.397	0.238	0.301136
FBgn0028645	CG7644	beat-Ib	0.000203188	0.129387	0.362	0.301	0.304782
FBgn0261928	CG42795	CG42795	0.00020392	0.125412	0.267	0.19	0.30588
FBgn0036454	CG17839	CG17839	0.000227004	0.0511278	0.156	0.119	0.340506
FBgn0000179	CG3578	bi	0.000234598	0.309592	0.292	0.227	0.351897
FBgn0039816	CG11317	CG11317	0.000278717	0.0545372	0.212	0.175	0.418076
FBgn0025360	CG18455	Optix	0.000314717	0.0487567	0.174	0.159	0.472076
FBgn0262737	CG7437	mub	0.000334948	0.754762	0.74	0.651	0.502422
FBgn0266100	CG44837	CG44837	0.000338746	0.0474453	0.162	0.129	0.508119
FBgn0260660	CG42543	Mp	0.000361407	0.186084	0.404	0.327	0.542111
FBgn0033358	CG8216	spab	0.000384993	0.0508904	0.463	0.431	0.577489
FBgn0000636	CG5803	Fas3	0.000398119	0.122339	0.276	0.222	0.597178
FBgn0005775	CG7503	Con	0.000417233	0.991706	0.658	0.491	0.625849
FBgn0259245	CG42343	DIP-beta	0.00047478	0.075736	0.155	0.124	0.71217
FBgn0027654	CG2239	jdp	0.000481476	0.483974	0.864	0.833	0.722214
FBgn0264339	CG43795	CG43795	0.000490051	-0.0325335	0.195	0.206	0.735076
FBgn0053516	CG33516	dpr3	0.000491328	0.062816	0.173	0.135	0.736992
FBgn0267001	CG42338	Ten-a	0.000500725	1.99117	0.909	0.803	0.751087
FBgn0085413	CG34384	CG34384	0.000524497	0.142782	0.302	0.232	0.786746
FBgn0002023	CG10699	Lim3	0.0005439	0.0436887	0.11	0.09	0.81585
FBgn0038494	CG4135	beat-IIb	0.000556104	0.03968	0.138	0.107	0.834156
FBgn0261262	CG42613	CG42613	0.000566154	0.743518	0.622	0.416	0.849231
FBgn0032629	CG15138	beat-IIIc	0.000579778	0.331917	0.403	0.318	0.869667
FBgn0027608	CG2082	CG2082	0.000602374	0.134839	0.379	0.313	0.903561
FBgn0001226	CG4466	Hsp27	0.000645242	-0.14225	0.18	0.197	0.967863
FBgn0004885	CG6863	tok	0.000651739	0.0346369	0.135	0.11	0.977609
FBgn0034731	CG10384	CG10384	0.000655664	0.0217317	0.238	0.218	0.983495
FBgn0033791	CG3915	Drl-2	0.000686329	0.0753656	0.219	0.182	1
FBgn0261871	CG33507	dpr2	0.000696284	0.0476062	0.183	0.147	1
FBgn0284243	CG9277	betaTub56D	0.000765941	0.0788479	0.432	0.397	1
FBgn0014859	CG1864	Hr38	0.000779556	-0.061511	0.391	0.368	1
FBgn0263873	CG43720	sick	0.000829563	0.0289403	0.13	0.109	1
FBgn0262160	CG9932	CG9932	0.000910307	0.127182	0.294	0.229	1
FBgn0039380	CG5890	CG5890	0.00096331	0.0624542	0.289	0.247	1
FBgn0003274	CG4918	RpLP2	0.000981185	0.0861759	0.653	0.636	1
FBgn0039420	CG6154	CG6154	0.00107186	0.059692	0.207	0.176	1
FBgn0051619	CG31619	nolo	0.00112806	0.11339	0.287	0.229	1
FBgn0085395	CG34366	Shawl	0.00117225	0.0573702	0.171	0.136	1
FBgn0040726	CG13439	dpr1	0.00130367	0.183157	0.366	0.294	1
FBgn0015609	CG7100	CadN	0.00133096	0.231975	0.573	0.504	1
FBgn0000116	CG32031	Argk	0.0014975	0.361786	0.751	0.701	1
FBgn0085370	CG34341	Pde11	0.00155882	0.0530431	0.17	0.133	1
FBgn0051345	CG31345	CG31345	0.00157909	0.0461641	0.123	0.09	1
FBgn0001229	CG4190	Hsp67Bc	0.00159088	-0.0246261	0.315	0.31	1
FBgn0266756	CG44012	btsz	0.00161168	0.0426582	0.153	0.128	1
FBgn0036927	CG7433	Gabat	0.00168158	-0.00728578	0.256	0.269	1
FBgn0037956	CG6959	CG6959	0.00171501	0.0176366	0.116	0.099	1
FBgn0052432	CG32432	CG32432	0.00172891	0.0495917	0.204	0.162	1
FBgn0264006	CG43749	dysc	0.0018142	0.450267	0.815	0.766	1
FBgn0039617	CG14521	DIP-gamma	0.0018865	0.035919	0.225	0.192	1
FBgn0263257	CG43395	Cngl	0.00208292	1.38872	0.83	0.73	1
FBgn0035756	CG32381	unc-13-4A	0.00219398	0.218333	0.424	0.361	1
FBgn0027589	CG1688	CG1688	0.00226938	0.0655926	0.206	0.166	1
FBgn0261999	CG42817	Ca-Ma2d	0.00235462	0.0525723	0.256	0.221	1
FBgn0264574	CG43946	Glut1	0.00244757	0.0936362	0.349	0.296	1
FBgn0262018	CG42829	CadN2	0.00249323	0.0517398	0.184	0.143	1
FBgn0264442	CG43860	ab	0.00250266	0.056113	0.259	0.225	1
FBgn0263930	CG4974	dally	0.00252876	0.148302	0.283	0.21	1
FBgn0031697	CG14024	CG14024	0.00261143	0.0276439	0.286	0.267	1
FBgn0004910	CG15855	Eip63F-1	0.00266486	0.0619547	0.135	0.097	1
FBgn0003326	CG17579	sca	0.00277465	0.0595273	0.154	0.124	1
FBgn0025682	CG9148	scf	0.00292324	0.0138163	0.13	0.117	1
FBgn0026160	CG7958	tna	0.00293336	0.401691	0.506	0.351	1
FBgn0000422	CG10697	Ddc	0.00299294	0.125747	0.608	0.591	1
FBgn0000097	CG3166	aop	0.00301604	0.0945787	0.262	0.206	1
FBgn0037913	CG6783	fabp	0.00317235	0.0130531	0.206	0.184	1
FBgn0036043	CG8177	CG8177	0.00318593	0.0913815	0.373	0.33	1
FBgn0262509	CG43079	nrm	0.00337235	0.0726054	0.277	0.24	1
FBgn0039647	CG14509	jus	0.00357704	0.0838057	0.467	0.425	1
FBgn0011676	CG6713	Nos	0.00362708	0.0662984	0.133	0.109	1
FBgn0261509	CG14351	haf	0.00369888	0.105902	0.188	0.156	1
FBgn0086677	CG30040	jeb	0.00371499	1.46402	0.807	0.729	1
FBgn0261588	CG42698	pdm3	0.00398416	0.103316	0.338	0.313	1
FBgn0264087	CG43756	Slob	0.00420285	0.0595412	0.241	0.193	1
FBgn0004514	CG7485	Oct-TyrR	0.00461229	0.0469839	0.16	0.127	1
FBgn0264908	CG44099	pHCl-1	0.00470325	0.066416	0.297	0.271	1
FBgn0031770	CG13995	CG13995	0.00480502	0.11198	0.341	0.287	1
FBgn0001225	CG4183	Hsp26	0.00494947	-0.13942	0.208	0.236	1
FBgn0038156	CG14372	side-IV	0.00504261	0.0314911	0.118	0.09	1
FBgn0004449	CG5723	Ten-m	0.00504987	0.167539	0.387	0.315	1
FBgn0011666	CG5099	msi	0.00506698	0.672653	0.597	0.392	1
FBgn0259243	CG42341	Pka-R1	0.00515599	0.158816	0.439	0.377	1
FBgn0263980	CG43729	Stacl	0.00576815	0.220437	0.73	0.704	1
FBgn0250908	CG42242	beat-VII	0.00589552	0.20812	0.515	0.46	1
FBgn0259789	CG12701	zld	0.00641432	0.0541644	0.164	0.142	1
FBgn0085421	CG34392	Epac	0.00665711	0.0842324	0.295	0.253	1
FBgn0034408	CG12758	sano	0.00671068	0.032706	0.114	0.09	1
FBgn0013981	CG3379	His4r	0.00691869	0.505435	0.974	0.975	1
FBgn0083950	CG34114	side-VI	0.00697328	0.427942	0.501	0.366	1
FBgn0003429	CG10693	slo	0.00698504	0.461692	0.71	0.624	1
FBgn0259242	CG42340	CG42340	0.0070031	0.0793181	0.293	0.244	1
FBgn0013973	CG1470	Gycbeta100B	0.00717065	0.0541344	0.223	0.182	1
FBgn0024841	CG1963	Pcd	0.00720053	0.0593936	0.357	0.322	1
FBgn0052506	CG32506	CG32506	0.00781373	0.071316	0.333	0.289	1
FBgn0039770	CG15537	CG15537	0.00854884	0.111846	0.107	0.091	1
FBgn0010113	CG15532	hdc	0.00857588	1.09037	0.72	0.617	1
FBgn0085400	CG34371	side-V	0.008703	0.0638996	0.22	0.179	1
FBgn0028704	CG18660	Nckx30C	0.00921581	0.415809	0.681	0.624	1
FBgn0004509	CG10772	Fur1	0.0103794	0.0518707	0.224	0.187	1
FBgn0083975	CG34139	Nlg4	0.0106102	0.0557431	0.216	0.181	1
FBgn0031374	CG7337	Wdr62	0.0106869	0.350605	0.533	0.406	1
FBgn0030174	CG15312	CG15312	0.0107064	0.0731421	0.26	0.219	1
FBgn0265597	CG44424	rad	0.0114219	0.843557	0.735	0.636	1
FBgn0033192	CG2105	Corin	0.011557	0.103511	0.309	0.251	1
FBgn0261549	CG42667	rdgA	0.0120503	0.341259	0.491	0.409	1
FBgn0010114	CG2040	hig	0.0132977	0.264131	0.558	0.518	1
FBgn0043364	CG4427	cbt	0.013437	0.0164279	0.167	0.151	1
FBgn0263994	CG43737	CG43737	0.0138361	0.356575	0.57	0.466	1
FBgn0264490	CG18389	Eip93F	0.0143043	0.358522	0.327	0.225	1
FBgn0031306	CG4577	CG4577	0.0145472	0.259108	0.414	0.355	1
FBgn0052600	CG32600	dpr8	0.0147536	0.271637	0.492	0.4	1
FBgn0040823	CG14162	dpr6	0.0153206	0.0952097	0.331	0.291	1
FBgn0019650	CG11186	toy	0.0153947	0.0362779	0.29	0.282	1
FBgn0038498	CG14334	beat-IIa	0.0158686	0.208712	0.335	0.251	1
FBgn0023179	CG6438	amon	0.0170482	0.240982	0.48	0.395	1
FBgn0285952	CG3186	eEF5	0.0186906	0.0531734	0.356	0.321	1
FBgn0086778	CG32538	nAChRalpha7	0.0187089	0.271	0.505	0.422	1
FBgn0032048	CG13094	Dh31	0.0194729	0.121479	0.141	0.133	1
FBgn0262593	CG43128	Shab	0.0195602	0.22424	0.494	0.412	1
FBgn0014184	CG16747	Oda	0.0201584	0.399568	0.717	0.661	1
FBgn0037676	CG8861	CG8861	0.020522	0.0576431	0.277	0.248	1
FBgn0004858	CG4220	elB	0.0212363	0.0492679	0.246	0.218	1
FBgn0030897	CG5744	Frq1	0.0220871	0.62507	0.59	0.453	1
FBgn0028496	CG30116	CG30116	0.0228054	0.149284	0.424	0.364	1
FBgn0039089	CG10152	beat-IV	0.023234	0.05682	0.253	0.223	1
FBgn0029761	CG10706	SK	0.023523	0.525896	0.667	0.525	1
FBgn0003165	CG9755	pum	0.0235286	0.891615	0.862	0.766	1
FBgn0014163	CG4609	fax	0.0237034	1.12782	0.792	0.639	1
FBgn0015400	CG4977	kek2	0.0238696	0.0916201	0.412	0.371	1
FBgn0267668	CR46006	lncRNA:CR46006	0.0245937	0.0431169	0.137	0.108	1
FBgn0259821	CG42402	CG42402	0.0247512	0.237	0.443	0.374	1
FBgn0264815	CG44007	Pde1c	0.024797	0.143101	0.391	0.331	1
FBgn0027598	CG31012	cindr	0.0249812	0.393812	0.535	0.399	1
FBgn0038653	CG18208	Octalpha2R	0.0253607	0.129004	0.376	0.326	1
FBgn0010313	CG2530	corto	0.0259929	0.147718	0.407	0.342	1
FBgn0036144	CG6207	GlcAT-P	0.026206	0.0688568	0.226	0.186	1
FBgn0262738	CG3620	norpA	0.0271479	0.213743	0.538	0.47	1
FBgn0033438	CG1794	Mmp2	0.0281873	0.00476741	0.264	0.247	1
FBgn0000028	CG9151	acj6	0.0283283	0.258404	0.203	0.177	1
FBgn0033268	CG2297	Obp44a	0.028796	0.125531	0.216	0.172	1
FBgn0085380	CG34351	CG34351	0.0295504	0.018263	0.107	0.091	1
FBgn0011582	CG9652	Dop1R1	0.031913	0.0708859	0.285	0.26	1
FBgn0003423	CG1417	slgA	0.0328127	0.169462	0.417	0.352	1
FBgn0032797	CG10186	Hasp	0.0334783	0.194221	0.795	0.811	1
FBgn0038087	CG10134	beat-Va	0.0343639	0.0317637	0.175	0.151	1
FBgn0001235	CG17117	hth	0.0355274	0.429261	0.499	0.402	1
FBgn0028875	CG32975	nAChRalpha5	0.0358557	0.730145	0.831	0.791	1
FBgn0044328	CG32052	CG32052	0.0362241	0.0809848	0.34	0.307	1
FBgn0041707	CG1168	7B2	0.0384778	0.0659223	0.883	0.873	1
FBgn0028644	CG4838	beat-Ic	0.0390553	0.506601	0.461	0.346	1
FBgn0265002	CG44153	CG44153	0.0401345	-0.00233772	0.255	0.241	1
FBgn0028481	CG4341	CG4341	0.0405331	0.0399627	0.226	0.197	1
FBgn0034636	CG10440	twz	0.0407799	0.00145586	0.132	0.127	1
FBgn0284245	CG8280	eEF1alpha1	0.042782	0.083892	0.319	0.265	1
FBgn0263353	CG11000	CG11000	0.0434984	0.221207	0.566	0.496	1
FBgn0024963	CG7535	GluClalpha	0.0444639	0.484338	0.683	0.595	1
FBgn0036844	CG14080	Mkp3	0.044663	0.272763	0.54	0.462	1
FBgn0085387	CG34358	shakB	0.0460106	0.32981	0.522	0.436	1
FBgn0032833	CG10664	COX4	0.0472716	-0.11526	0.784	0.81	1
FBgn0036494	CG7250	Toll-6	0.0499027	0.336159	0.408	0.303	1
FBgn0000535	CG10952	eag	0.0505926	0.120018	0.337	0.281	1
FBgn0005636	CG3385	nvy	0.0525553	-0.000425608	0.153	0.151	1
FBgn0052647	CG32647	CG32647	0.0532393	0.0787454	0.248	0.201	1
FBgn0004244	CG10537	Rdl	0.0538315	1.15428	0.963	0.949	1
FBgn0039054	CG13830	Cow	0.0544537	0.276335	0.52	0.437	1
FBgn0260657	CG42540	CG42540	0.0550754	0.38811	0.752	0.698	1
FBgn0037874	CG4800	Tctp	0.0615072	0.053598	0.398	0.375	1
FBgn0270928	CG32848	VAChT	0.0616277	0.323231	0.691	0.66	1
FBgn0035171	CG12502	CG12502	0.0640502	0.0120684	0.168	0.155	1
FBgn0038237	CG8279	Pde6	0.0673502	0.430935	0.606	0.527	1
FBgn0286778	CG46385	CG46385	0.0693786	0.306009	0.514	0.427	1
FBgn0000633	CG17716	CG17716	0.0703447	0.441381	0.492	0.387	1
FBgn0053202	CG33202	dpr11	0.0709047	0.0782772	0.299	0.259	1
FBgn0085432	CG34403	pan	0.0732327	0.601667	0.737	0.635	1
FBgn0033108	CG15236	CG15236	0.0745001	0.136467	0.35	0.306	1
FBgn0085419	CG34390	Rgk2	0.0773621	0.00224841	0.189	0.19	1
FBgn0000108	CG7727	Appl	0.0789138	1.04663	0.876	0.832	1
FBgn0265182	CG44247	CG44247	0.0807175	0.0788721	0.323	0.283	1
FBgn0086758	CG31666	chinmo	0.0809591	0.338597	0.707	0.647	1
FBgn0023534	CG17778	CG17778	0.0813541	0.0569502	0.219	0.189	1
FBgn0025885	CG11143	Inos	0.085148	0.0247301	0.124	0.107	1
FBgn0002593	CG4087	RpLP1	0.0853119	0.193524	0.749	0.726	1
FBgn0003091	CG6622	Pkc53E	0.0867979	0.716738	0.645	0.522	1
FBgn0000114	CG31762	bru1	0.0880014	0.0309791	0.109	0.09	1
FBgn0083991	CG34155	CG34155	0.0893312	0.0521997	0.132	0.112	1
FBgn0034286	CG33996	dpr13	0.0909087	0.317619	0.435	0.352	1
FBgn0259244	CG42342	CG42342	0.0915663	0.128179	0.497	0.458	1
FBgn0260793	CG42573	2mit	0.0922728	0.0586005	0.211	0.181	1
FBgn0013686	CR34094	mt:lrRNA	0.099211	4.33788	0.907	0.75	1
FBgn0266871	CR45332	lncRNA:CR45332	0.0999765	-0.00858207	0.14	0.152	1
FBgn0016061	CG31062	side	0.108532	0.244097	0.506	0.436	1
FBgn0031835	CG11319	CG11319	0.110251	0.147316	0.376	0.323	1
FBgn0267336	CG34360	Glut4EF	0.114052	0.855665	0.792	0.712	1
FBgn0265487	CG33197	mbl	0.11444	0.681776	0.604	0.531	1
FBgn0010411	CG8900	RpS18	0.118577	-0.025441	0.837	0.881	1
FBgn0003435	CG9218	sm	0.118762	1.34637	0.928	0.902	1
FBgn0000575	CG1007	emc	0.119471	0.110449	0.401	0.35	1
FBgn0053179	CG33179	beat-IIIb	0.119778	0.0467422	0.362	0.336	1
FBgn0011828	CG12002	Pxn	0.122928	-0.00495791	0.127	0.133	1
FBgn0038929	CG13408	CG13408	0.124184	-0.015317	0.115	0.115	1
FBgn0027339	CG11352	jim	0.128743	1.72697	0.936	0.912	1
FBgn0261574	CG7749	kug	0.135658	0.0533523	0.187	0.158	1
FBgn0035170	CG12191	dpr20	0.135832	0.0192349	0.113	0.098	1
FBgn0085434	CG34405	NaCP60E	0.135907	0.545873	0.655	0.523	1
FBgn0010473	CG15427	tutl	0.136471	0.475892	0.664	0.564	1
FBgn0039349	CG4685	Ssadh	0.142613	-0.00453434	0.15	0.154	1
FBgn0053147	CG33147	Hs3st-A	0.148833	0.497429	0.724	0.642	1
FBgn0001233	CG1242	Hsp83	0.149337	0.0390348	0.659	0.657	1
FBgn0066084	CG30425	RpL41	0.150919	2.64202	0.878	0.641	1
FBgn0013954	CG11001	Fkbp12	0.152411	0.00201561	0.645	0.647	1
FBgn0260462	CG12163	CG12163	0.15306	-0.00193171	0.176	0.178	1
FBgn0264606	CG43955	Fife	0.160847	0.0711263	0.58	0.565	1
FBgn0083963	CG34127	Nlg3	0.163322	0.156011	0.61	0.575	1
FBgn0261089	CG5559	Sytalpha	0.163516	0.0426594	0.179	0.149	1
FBgn0036934	CG7395	sNPF-R	0.165521	0.0326982	0.109	0.092	1
FBgn0261804	CG42750	CG42750	0.166926	0.140455	0.408	0.355	1
FBgn0000024	CG17907	Ace	0.171106	0.520094	0.643	0.551	1
FBgn0031424	CG9887	VGlut	0.179328	0.159866	0.155	0.115	1
FBgn0005771	CG4491	noc	0.189103	0.018268	0.154	0.141	1
FBgn0038321	CG6218	CG6218	0.200168	0.0178016	0.127	0.115	1
FBgn0267252	CG3694	Ggamma30A	0.2035	1.18465	0.917	0.912	1
FBgn0036851	CG14082	CG14082	0.203625	-0.0064326	0.103	0.107	1
FBgn0010263	CG3151	Rbp9	0.205546	0.378395	0.599	0.506	1
FBgn0001186	CG3001	Hex-A	0.206193	1.13407	0.664	0.413	1
FBgn0264503	CG43902	CG43902	0.216641	0.203626	0.3	0.241	1
FBgn0004880	CG1130	scrt	0.21936	0.43772	0.834	0.819	1
FBgn0022382	CG15862	Pka-R2	0.220634	0.205246	0.438	0.344	1
FBgn0035816	CG13685	CG13685	0.22188	0.0355202	0.204	0.182	1
FBgn0259108	CG34387	futsch	0.233496	1.63089	0.942	0.907	1
FBgn0266137	CG18741	Dop1R2	0.235213	0.0181472	0.127	0.112	1
FBgn0041094	CG7590	scyl	0.236266	0.199329	0.466	0.397	1
FBgn0259213	CG42313	side-II	0.237168	0.079808	0.422	0.391	1
FBgn0000064	CG6058	Ald1	0.240026	0.156844	0.676	0.647	1
FBgn0004580	CG6702	Cbp53E	0.241111	1.85478	0.697	0.551	1
FBgn0053543	CG33543	CG33543	0.248763	0.262248	0.417	0.35	1
FBgn0035032	CG4692	ATPsynF	0.249041	0.0988191	0.786	0.779	1
FBgn0261556	CG42674	CG42674	0.251349	0.105526	0.277	0.249	1
FBgn0263392	CG43444	Tet	0.251543	0.2013	0.584	0.526	1
FBgn0085414	CG34385	dpr12	0.260973	0.128967	0.462	0.415	1
FBgn0032840	CG13968	sNPF	0.267192	0.276341	0.235	0.205	1
FBgn0033484	CG2269	CG2269	0.268887	0.9292	0.848	0.803	1
FBgn0036935	CG14186	CG14186	0.269041	0.0548567	0.208	0.181	1
FBgn0031414	CG33955	eys	0.269464	0.188927	0.45	0.408	1
FBgn0035499	CG14996	Chd64	0.273465	0.021037	0.176	0.155	1
FBgn0085383	CG34354	CG34354	0.283447	0.125725	0.362	0.323	1
FBgn0266418	CG45058	wake	0.289652	0.0191437	0.162	0.146	1
FBgn0030090	CG12664	fend	0.289814	0.239364	0.556	0.482	1
FBgn0263397	CG8585	Ih	0.300771	1.22838	0.841	0.762	1
FBgn0038084	CG14390	beat-Vc	0.304935	0.0376151	0.147	0.125	1
FBgn0263289	CG43398	scrib	0.307762	0.0395512	0.181	0.151	1
FBgn0037525	CG17816	CG17816	0.310557	0.294695	0.529	0.438	1
FBgn0039064	CG4467	CG4467	0.316593	0.344865	0.567	0.448	1
FBgn0011589	CG5076	Elk	0.316622	0.0127599	0.101	0.091	1
FBgn0259171	CG42276	Pde9	0.317012	0.272243	0.65	0.612	1
FBgn0004198	CG11387	ct	0.339057	0.675343	0.362	0.257	1
FBgn0000303	CG12345	ChAT	0.353543	0.173716	0.584	0.545	1
FBgn0262782	CG5362	Mdh1	0.371761	0.00872499	0.154	0.146	1
FBgn0266801	CG45263	CG45263	0.372716	0.128263	0.476	0.441	1
FBgn0013433	CG4846	beat-Ia	0.373901	0.0186923	0.217	0.209	1
FBgn0264001	CG43744	bru3	0.376788	1.37624	0.866	0.796	1
FBgn0039584	CG14064	beat-VI	0.395959	0.0479512	0.284	0.263	1
FBgn0085391	CG34362	trv	0.397272	1.09801	0.712	0.602	1
FBgn0031632	CG15628	CG15628	0.408253	0.119293	0.521	0.486	1
FBgn0000273	CG4379	Pka-C1	0.410108	0.461221	0.659	0.553	1
FBgn0017590	CG6669	klg	0.426758	0.13929	0.547	0.524	1
FBgn0083949	CG34113	side-III	0.431198	0.273015	0.499	0.425	1
FBgn0030723	CG14948	dpr18	0.431302	0.0225339	0.173	0.16	1
FBgn0033250	CG14762	CG14762	0.433624	0.213387	0.704	0.681	1
FBgn0260943	CG32169	Rbp6	0.443009	2.15025	0.873	0.802	1
FBgn0266851	CR45312	lncRNA:CR45312	0.451006	-0.00865669	0.236	0.231	1
FBgn0261836	CG42768	Msp300	0.452046	1.09464	0.814	0.723	1
FBgn0030412	CG17762	Tomosyn	0.461725	0.459149	0.633	0.511	1
FBgn0038826	CG17838	Syp	0.463209	0.30729	0.505	0.399	1
FBgn0003380	CG12348	Sh	0.468416	1.99761	0.955	0.928	1
FBgn0029897	CG3203	RpL17	0.489946	0.0685921	0.647	0.646	1
FBgn0004242	CG3139	Syt1	0.491275	0.844902	0.859	0.825	1
FBgn0038063	CG33976	Octbeta2R	0.494945	0.247587	0.433	0.345	1
FBgn0001091	CG12055	Gapdh1	0.506242	0.0124221	0.341	0.338	1
FBgn0010415	CG10497	Sdc	0.515702	0.28589	0.702	0.66	1
FBgn0051997	CG31997	CG31997	0.528088	0.0313011	0.123	0.115	1
FBgn0013467	CG18285	igl	0.530646	0.558884	0.662	0.579	1
FBgn0032400	CG6770	CG6770	0.533512	0.597995	0.783	0.681	1
FBgn0000635	CG3665	Fas2	0.546618	0.301555	0.345	0.248	1
FBgn0034725	CG6044	CG6044	0.550159	-0.0184007	0.389	0.395	1
FBgn0053143	CG33143	CG33143	0.565328	0.0339353	0.345	0.331	1
FBgn0085447	CG34418	sif	0.576604	1.02574	0.659	0.417	1
FBgn0038282	CG33485	dpr9	0.576681	0.45373	0.572	0.5	1
FBgn0263220	CG43388	Hk	0.577606	0.505429	0.722	0.641	1
FBgn0015399	CG12283	kek1	0.582706	0.219312	0.496	0.432	1
FBgn0052677	CG32677	X11Lbeta	0.592612	0.154948	0.393	0.328	1
FBgn0032901	CG9339	sky	0.595975	0.0833126	0.466	0.449	1
FBgn0020907	CG14904	Scp2	0.597228	0.053752	0.181	0.165	1
FBgn0285948	CG15442	RpL27A	0.602176	0.187067	0.761	0.755	1
FBgn0261597	CG10305	RpS26	0.6058	0.106343	0.783	0.803	1
FBgn0004611	CG4574	Plc21C	0.626018	0.19431	0.496	0.446	1
FBgn0033544	CG7220	CG7220	0.627699	0.01794	0.273	0.257	1
FBgn0261552	CG42670	ps	0.629118	0.785933	0.909	0.911	1
FBgn0019643	CG3318	AANAT1	0.636751	0.00463306	0.142	0.144	1
FBgn0039346	CG5079	CG5079	0.637615	-0.0051049	0.168	0.169	1
FBgn0052062	CG32062	Rbfox1	0.647682	1.2022	0.868	0.8	1
FBgn0013576	CG32464	mtd	0.673861	0.585417	0.753	0.658	1
FBgn0050089	CG30089	CG30089	0.687378	0.0139709	0.134	0.121	1
FBgn0029814	CG15765	CG15765	0.696584	0.312333	0.527	0.468	1
FBgn0034978	CG3257	CG3257	0.701859	0.0180168	0.242	0.233	1
FBgn0261244	CG33174	inaE	0.707413	0.20077	0.404	0.322	1
FBgn0034138	CG8332	RpS15	0.707799	0.253388	0.888	0.895	1
FBgn0003360	CG16944	sesB	0.721663	0.555372	0.826	0.816	1
FBgn0002868	CG9470	MtnA	0.725244	0.321805	0.325	0.194	1
FBgn0051221	CG31221	CG31221	0.735209	8.40918	0.978	0.964	1
FBgn0262869	CG43224	Gfrl	0.740339	0.179951	0.455	0.392	1
FBgn0029123	CG18024	SoxN	0.741445	0.191032	0.236	0.177	1
FBgn0265296	CG42256	Dscam2	0.749744	0.656125	0.725	0.668	1
FBgn0032151	CG4128	nAChRalpha6	0.779658	1.39802	0.858	0.765	1
FBgn0263995	CG43738	cpo	0.793772	0.537367	0.793	0.762	1
FBgn0038839	CG10830	Ktl	0.833374	0.0365055	0.361	0.34	1
FBgn0050158	CG30158	CG30158	0.833601	0.00797405	0.117	0.113	1
FBgn0004369	CG11516	Ptp99A	0.871925	0.678137	0.762	0.647	1
FBgn0041605	CG32490	cpx	0.874393	0.624888	0.899	0.89	1
FBgn0051665	CG31665	wry	0.878961	0.391397	0.499	0.383	1
FBgn0285944	CG9907	para	0.889545	1.14719	0.858	0.787	1
FBgn0052017	CG32017	CG32017	0.932127	0.193767	0.395	0.293	1
FBgn0052264	CG32264	CG32264	0.948493	0.687865	0.77	0.685	1
FBgn0265598	CG44425	Bx	0.952115	0.0698101	0.21	0.195	1
FBgn0262508	CG43078	CG43078	0.96438	0.0108407	0.105	0.096	1
FBgn0000036	CG5610	nAChRalpha1	0.981618	0.171645	0.441	0.382	1
FBgn0036165	CG7533	chrb	0.981826	0.569447	0.698	0.617	1
FBgn0261788	CG42734	Ank2	0.999374	0.819229	0.81	0.736	1

## Sheet: Global_C3
FlyBaseID	GeneID	Gene symbol	p_val	avg_diff	pct.1	pct.2	p_val_adj
FBgn0019660	CR32665	lncRNA:roX2	0	-2.86243	0.009	0.863	0
FBgn0004652	CG14307	fru	2.27263e-71	0.460618	0.396	0.193	3.40894e-68
FBgn0002940	CG4550	ninaE	9.60825e-69	-0.362795	0.089	0.242	1.44124e-65
FBgn0058469	CR40469	lncRNA:CR40469	7.77396e-57	0.0753235	0.134	0.077	1.16609e-53
FBgn0011693	CG4899	Pdh	2.76735e-48	-0.152943	0.028	0.107	4.15102e-45
FBgn0051690	CG31690	CG31690	4.54327e-40	0.169717	0.243	0.141	6.81491e-37
FBgn0052057	CG32057	dpr10	2.32609e-37	0.143316	0.217	0.128	3.48913e-34
FBgn0003301	CG9533	rut	1.3971e-36	0.0937602	0.208	0.132	2.09565e-33
FBgn0013995	CG5685	Calx	3.48652e-36	0.137882	0.171	0.082	5.22979e-33
FBgn0004619	CG8442	GluRIA	2.87536e-34	0.297987	0.309	0.186	4.31304e-31
FBgn0029768	CG16752	SPR	3.28417e-29	0.183359	0.232	0.146	4.92626e-26
FBgn0036821	CG3961	CG3961	1.10671e-28	0.0862267	0.126	0.062	1.66006e-25
FBgn0087012	CG1056	5-HT2A	1.80826e-27	0.186678	0.226	0.136	2.71239e-24
FBgn0052982	CG32982	CG32982	2.64457e-27	0.139258	0.173	0.095	3.96685e-24
FBgn0283499	CG18402	InR	6.67908e-26	0.117171	0.202	0.132	1.00186e-22
FBgn0065099	CR33925	snRNA:7SK	6.73863e-26	2.30979	0.779	0.667	1.0108e-22
FBgn0036789	CG13702	AstC-R2	1.63655e-25	0.140712	0.158	0.084	2.45483e-22
FBgn0051324	CG31324	CG31324	2.02441e-25	0.227844	0.379	0.266	3.03662e-22
FBgn0264753	CG44011	Rgk1	5.21032e-24	0.0901054	0.141	0.078	7.81547e-21
FBgn0260971	CG42594	CG42594	9.72779e-24	0.186278	0.245	0.161	1.45917e-20
FBgn0267910	CR34335	lncRNA:CR34335	1.62389e-23	8.73775	0.994	0.956	2.43584e-20
FBgn0267322	CR45758	lncRNA:CR45758	1.00327e-22	0.0690499	0.124	0.073	1.50491e-19
FBgn0260429	CG42524	CG42524	3.89377e-22	0.0837088	0.14	0.08	5.84065e-19
FBgn0083228	CG5907	Frq2	4.87406e-22	0.116554	0.185	0.118	7.31108e-19
FBgn0029824	CG3726	CG3726	4.89561e-22	0.131464	0.243	0.172	7.34342e-19
FBgn0042696	CG2380	NfI	1.41737e-21	0.143919	0.277	0.187	2.12605e-18
FBgn0261988	CG17998	Gprk2	3.32194e-21	0.22951	0.338	0.219	4.9829e-18
FBgn0029663	CG10804	CG10804	3.81216e-21	0.413108	0.515	0.385	5.71824e-18
FBgn0033403	CG13739	CG13739	2.1234e-20	0.44643	0.383	0.249	3.18509e-17
FBgn0283651	CG46301	CG46301	7.57193e-20	0.066115	0.113	0.069	1.13579e-16
FBgn0000121	CG5962	Arr2	8.82646e-20	-0.114263	0.091	0.151	1.32397e-16
FBgn0002945	CG11614	nkd	9.01713e-20	0.157442	0.228	0.145	1.35257e-16
FBgn0004395	CG4620	unk	5.27622e-19	0.136174	0.241	0.169	7.91433e-16
FBgn0261260	CG42611	mgl	1.54334e-18	0.0864741	0.133	0.08	2.31501e-15
FBgn0031299	CG4629	CG4629	2.07319e-18	0.0565865	0.129	0.081	3.10979e-15
FBgn0000547	CG12676	ed	3.94034e-18	0.152905	0.252	0.176	5.91051e-15
FBgn0259170	CG42275	alpha-Man-Ia	9.445e-18	0.0779251	0.209	0.159	1.41675e-14
FBgn0002868	CG9470	MtnA	4.99688e-17	0.314955	0.334	0.202	7.49532e-14
FBgn0262473	CG5490	Tl	1.28188e-16	0.0691956	0.142	0.095	1.92281e-13
FBgn0038665	CG12269	euc	1.30676e-16	0.0533248	0.107	0.073	1.96014e-13
FBgn0036801	CG6896	MYPT-75D	1.32538e-16	0.0835786	0.204	0.151	1.98808e-13
FBgn0020269	CG10145	mspo	1.6666e-16	0.128157	0.194	0.119	2.4999e-13
FBgn0250867	CG42238	CG42238	3.06102e-16	0.130742	0.243	0.166	4.59152e-13
FBgn0052521	CG32521	CG32521	3.37758e-16	0.0718495	0.132	0.088	5.06637e-13
FBgn0024321	CG8524	NK7.1	3.41911e-16	0.0373728	0.143	0.111	5.12867e-13
FBgn0033987	CG12424	ckn	4.23984e-16	0.0828335	0.145	0.093	6.35977e-13
FBgn0015777	CG9261	nrv2	5.14871e-16	0.0780467	0.156	0.104	7.72307e-13
FBgn0031738	CG9171	CG9171	1.92875e-15	0.0509078	0.114	0.073	2.89313e-12
FBgn0037015	CG13253	cmpy	4.23801e-15	0.0831838	0.198	0.141	6.35702e-12
FBgn0052066	CG32066	CG32066	8.62354e-15	0.0518737	0.145	0.106	1.29353e-11
FBgn0051163	CG31163	SKIP	8.85872e-15	0.192761	0.353	0.273	1.32881e-11
FBgn0039209	CG13624	REPTOR	1.19277e-14	0.114563	0.283	0.222	1.78916e-11
FBgn0040765	CG33473	luna	2.00315e-14	0.232804	0.342	0.245	3.00473e-11
FBgn0261649	CG31247	tinc	2.43976e-14	0.0412386	0.133	0.106	3.65964e-11
FBgn0011666	CG5099	msi	4.41038e-14	0.987854	0.71	0.529	6.61558e-11
FBgn0260442	CG6831	rhea	7.25752e-14	0.0299698	0.106	0.075	1.08863e-10
FBgn0262614	CG43140	pyd	2.09229e-13	0.0798178	0.112	0.062	3.13844e-10
FBgn0264000	CG43743	GluRIB	2.09458e-13	0.339006	0.396	0.28	3.14187e-10
FBgn0264975	CG1634	Nrg	2.16097e-13	0.0609133	0.172	0.13	3.24145e-10
FBgn0264090	CG43759	CG43759	2.1667e-13	0.0503845	0.123	0.093	3.25005e-10
FBgn0000659	CG10002	fkh	2.2196e-13	0.0910248	0.126	0.08	3.3294e-10
FBgn0015519	CG2302	nAChRalpha3	4.77573e-13	0.09893	0.255	0.194	7.1636e-10
FBgn0262160	CG9932	CG9932	5.02182e-13	0.213688	0.343	0.249	7.53272e-10
FBgn0051814	CG31814	DIP-kappa	5.4934e-13	0.0901452	0.101	0.059	8.2401e-10
FBgn0260753	CG13758	Pdfr	8.57947e-13	0.0512346	0.112	0.075	1.28692e-09
FBgn0285963	CG46339	CG46339	2.69735e-12	0.0515363	0.102	0.061	4.04602e-09
FBgn0263773	CG43690	fok	3.12158e-12	0.102074	0.248	0.186	4.68237e-09
FBgn0086604	CG12484	side-VIII	3.2362e-12	0.0778357	0.191	0.148	4.8543e-09
FBgn0085753	CR40596	28SrRNA-Psi:CR40596	3.25519e-12	0.0570645	0.127	0.083	4.88279e-09
FBgn0004198	CG11387	ct	9.77629e-12	1.2394	0.643	0.516	1.46644e-08
FBgn0263994	CG43737	CG43737	1.26763e-11	0.315983	0.414	0.287	1.90144e-08
FBgn0032666	CG5758	CG5758	1.3479e-11	0.111409	0.195	0.127	2.02185e-08
FBgn0052206	CG32206	CG32206	1.51356e-11	0.0762609	0.225	0.176	2.27033e-08
FBgn0261046	CG31190	Dscam3	1.70974e-11	0.0635923	0.172	0.128	2.56461e-08
FBgn0264273	CG33960	Sema2b	2.37625e-11	0.0749705	0.155	0.107	3.56438e-08
FBgn0027356	CG8604	Amph	2.46919e-11	0.05448	0.188	0.147	3.70378e-08
FBgn0001085	CG17697	fz	2.66493e-11	0.0664813	0.18	0.133	3.99739e-08
FBgn0030158	CG9686	CG9686	2.68792e-11	0.0491757	0.107	0.074	4.03188e-08
FBgn0031424	CG9887	VGlut	3.44159e-11	2.37684	0.986	0.985	5.16238e-08
FBgn0001186	CG3001	Hex-A	4.7949e-11	1.00624	0.672	0.459	7.19235e-08
FBgn0036725	CG18265	CG18265	4.95678e-11	0.0601346	0.121	0.076	7.43517e-08
FBgn0029123	CG18024	SoxN	5.79166e-11	0.487301	0.412	0.309	8.68749e-08
FBgn0033368	CG13743	CG13743	1.01913e-10	0.0499799	0.107	0.073	1.5287e-07
FBgn0265595	CG44422	CG44422	1.30529e-10	0.218907	0.32	0.235	1.95793e-07
FBgn0050463	CG30463	Pgant9	1.42416e-10	0.14314	0.265	0.197	2.13624e-07
FBgn0031736	CG11030	CG11030	1.45454e-10	0.0568301	0.117	0.079	2.1818e-07
FBgn0264308	CG43778	CG43778	2.53481e-10	0.116803	0.257	0.197	3.80221e-07
FBgn0004910	CG15855	Eip63F-1	2.54232e-10	0.0759477	0.235	0.192	3.81349e-07
FBgn0004607	CG1449	zfh2	2.62699e-10	0.0729224	0.124	0.082	3.94048e-07
FBgn0038246	CG14853	CG14853	3.27534e-10	0.0741908	0.173	0.124	4.91301e-07
FBgn0010300	CG10719	brat	4.50737e-10	0.145121	0.242	0.171	6.76106e-07
FBgn0000567	CG32180	Eip74EF	4.54743e-10	0.042249	0.124	0.093	6.82114e-07
FBgn0260941	CG42318	app	5.07717e-10	0.171495	0.26	0.189	7.61576e-07
FBgn0019985	CG11144	mGluR	6.54697e-10	0.102803	0.192	0.139	9.82046e-07
FBgn0030272	CG15201	CG15201	1.14365e-09	0.0984125	0.176	0.129	1.71547e-06
FBgn0028369	CG3653	kirre	1.40473e-09	0.177143	0.281	0.211	2.10709e-06
FBgn0261285	CG5629	Ppcs	1.43191e-09	0.0374774	0.136	0.108	2.14787e-06
FBgn0265052	CG44167	St3	1.60044e-09	0.0512611	0.171	0.129	2.40066e-06
FBgn0261698	CG42732	SLO2	1.77587e-09	0.125582	0.244	0.172	2.66381e-06
FBgn0004168	CG16720	5-HT1A	2.14007e-09	0.126554	0.163	0.107	3.21011e-06
FBgn0031016	CG12199	kek5	2.24742e-09	0.0587484	0.152	0.109	3.37113e-06
FBgn0003499	CG7847	sr	3.64425e-09	0.0682287	0.134	0.094	5.46638e-06
FBgn0019650	CG11186	toy	4.31437e-09	0.0877784	0.12	0.075	6.47156e-06
FBgn0083950	CG34114	side-VI	4.71201e-09	0.340061	0.427	0.32	7.06801e-06
FBgn0015229	CG6575	glec	6.27584e-09	0.372156	0.485	0.385	9.41375e-06
FBgn0286778	CG46385	CG46385	6.52368e-09	0.118586	0.264	0.198	9.78552e-06
FBgn0032629	CG15138	beat-IIIc	7.44347e-09	0.120525	0.18	0.121	1.11652e-05
FBgn0003091	CG6622	Pkc53E	7.94909e-09	0.386048	0.434	0.295	1.19236e-05
FBgn0031306	CG4577	CG4577	9.08936e-09	0.0947421	0.191	0.142	1.3634e-05
FBgn0038980	CG6919	Octbeta1R	1.01662e-08	0.12465	0.18	0.125	1.52493e-05
FBgn0029939	CG9650	CG9650	1.25907e-08	0.359102	0.435	0.357	1.88861e-05
FBgn0035816	CG13685	CG13685	1.30908e-08	0.0447629	0.17	0.138	1.96362e-05
FBgn0086680	CG10037	vvl	1.60686e-08	0.0934694	0.114	0.076	2.41029e-05
FBgn0010452	CG11280	trn	2.60558e-08	0.0648189	0.137	0.101	3.90837e-05
FBgn0085447	CG34418	sif	2.92196e-08	1.1448	0.748	0.563	4.38294e-05
FBgn0259243	CG42341	Pka-R1	3.52606e-08	0.0428419	0.221	0.185	5.28909e-05
FBgn0052204	CG32204	CG32204	3.74441e-08	0.0541725	0.109	0.073	5.61661e-05
FBgn0085399	CG34370	CG34370	4.95521e-08	0.0410826	0.173	0.145	7.43281e-05
FBgn0027598	CG31012	cindr	5.70937e-08	0.390289	0.496	0.366	8.56405e-05
FBgn0040726	CG13439	dpr1	7.11588e-08	0.111179	0.27	0.211	0.000106738
FBgn0035495	CG14989	CG14989	7.69046e-08	0.520081	0.483	0.416	0.000115357
FBgn0052626	CG32626	AMPdeam	8.28061e-08	0.0209169	0.134	0.118	0.000124209
FBgn0085412	CG34383	kmr	1.07381e-07	0.110109	0.282	0.224	0.000161072
FBgn0000179	CG3578	bi	1.10958e-07	0.154993	0.16	0.106	0.000166437
FBgn0262593	CG43128	Shab	1.64409e-07	0.14925	0.27	0.196	0.000246613
FBgn0052406	CG32406	PVRAP	1.70759e-07	0.0453921	0.155	0.125	0.000256138
FBgn0066101	CG31094	LpR1	2.46817e-07	0.0546893	0.157	0.124	0.000370226
FBgn0024189	CG33141	sns	2.50937e-07	0.0495735	0.125	0.091	0.000376406
FBgn0259234	CG42332	Camta	3.24465e-07	0.0275816	0.131	0.105	0.000486698
FBgn0261113	CG17836	Xrp1	3.36641e-07	0.00843281	0.151	0.138	0.000504962
FBgn0259111	CG42253	Ndae1	4.08321e-07	0.0123812	0.133	0.123	0.000612481
FBgn0051619	CG31619	nolo	4.11351e-07	0.0577036	0.141	0.102	0.000617027
FBgn0033356	CG8229	CG8229	4.3856e-07	-0.0534532	0.129	0.164	0.00065784
FBgn0037521	CG2993	CG2993	7.19671e-07	0.100787	0.304	0.241	0.00107951
FBgn0028644	CG4838	beat-Ic	8.19826e-07	0.408086	0.321	0.229	0.00122974
FBgn0264908	CG44099	pHCl-1	8.35767e-07	0.105496	0.239	0.183	0.00125365
FBgn0024841	CG1963	Pcd	8.8209e-07	0.0297201	0.101	0.077	0.00132313
FBgn0040532	CG8369	CG8369	9.06205e-07	0.109574	0.191	0.148	0.00135931
FBgn0028481	CG4341	CG4341	9.15321e-07	0.0818211	0.249	0.204	0.00137298
FBgn0011818	CG9884	oaf	9.31245e-07	0.0611471	0.15	0.113	0.00139687
FBgn0011582	CG9652	Dop1R1	9.70983e-07	0.0485318	0.127	0.093	0.00145647
FBgn0032151	CG4128	nAChRalpha6	1.06028e-06	0.93543	0.582	0.403	0.00159042
FBgn0259821	CG42402	CG42402	1.2267e-06	0.148753	0.282	0.221	0.00184005
FBgn0040397	CG3655	CG3655	1.24252e-06	0.0594602	0.131	0.094	0.00186378
FBgn0002643	CG8118	mam	1.35735e-06	0.0315245	0.128	0.103	0.00203603
FBgn0261574	CG7749	kug	1.37152e-06	0.0213178	0.128	0.104	0.00205729
FBgn0028645	CG7644	beat-Ib	1.55282e-06	0.1041	0.227	0.181	0.00232923
FBgn0013733	CG18076	shot	1.6946e-06	0.0909708	0.274	0.228	0.00254189
FBgn0004858	CG4220	elB	1.76896e-06	0.0388643	0.124	0.097	0.00265344
FBgn0267579	CR45919	lncRNA:CR45919	1.88305e-06	0.0389622	0.106	0.074	0.00282458
FBgn0250910	CG42244	Octbeta3R	2.43031e-06	0.0621246	0.156	0.12	0.00364546
FBgn0066084	CG30425	RpL41	2.77585e-06	1.8109	0.856	0.62	0.00416377
FBgn0023179	CG6438	amon	3.10236e-06	0.0981998	0.274	0.223	0.00465354
FBgn0015774	CG10521	NetB	3.22645e-06	0.129595	0.193	0.143	0.00483968
FBgn0031770	CG13995	CG13995	3.98189e-06	0.0358745	0.137	0.111	0.00597283
FBgn0261556	CG42674	CG42674	4.79466e-06	-0.0729418	0.219	0.224	0.00719199
FBgn0030913	CG6123	CG6123	6.28912e-06	0.0421389	0.132	0.106	0.00943368
FBgn0267668	CR46006	lncRNA:CR46006	8.15153e-06	0.105524	0.322	0.277	0.0122273
FBgn0004449	CG5723	Ten-m	8.62329e-06	0.12872	0.297	0.248	0.0129349
FBgn0085380	CG34351	CG34351	9.22277e-06	0.0295047	0.109	0.088	0.0138341
FBgn0260793	CG42573	2mit	1.01039e-05	0.0327738	0.148	0.124	0.0151559
FBgn0013686	CR34094	mt:lrRNA	1.01289e-05	6.0002	0.922	0.787	0.0151933
FBgn0036454	CG17839	CG17839	1.0371e-05	0.128853	0.279	0.23	0.0155565
FBgn0261262	CG42613	CG42613	1.07163e-05	0.518449	0.563	0.443	0.0160745
FBgn0034286	CG33996	dpr13	1.09888e-05	0.213408	0.317	0.239	0.0164832
FBgn0023534	CG17778	CG17778	1.10087e-05	0.00299294	0.176	0.171	0.016513
FBgn0266100	CG44837	CG44837	1.12048e-05	0.0298658	0.121	0.101	0.0168072
FBgn0052506	CG32506	CG32506	1.41925e-05	0.0474884	0.178	0.142	0.0212888
FBgn0000303	CG12345	ChAT	1.58607e-05	0.0555968	0.105	0.068	0.0237911
FBgn0263706	CG43658	CG43658	1.67929e-05	0.0170389	0.118	0.109	0.0251893
FBgn0263219	CG42330	Dscam4	1.84191e-05	0.0817042	0.256	0.218	0.0276286
FBgn0023095	CG11282	caps	1.95618e-05	0.0460727	0.148	0.119	0.0293427
FBgn0267033	CG45477	mamo	2.19764e-05	0.82436	0.681	0.595	0.0329647
FBgn0053543	CG33543	CG33543	2.37515e-05	0.189931	0.285	0.202	0.0356272
FBgn0085407	CG34378	Pvf3	2.53191e-05	0.531601	0.557	0.443	0.0379786
FBgn0085370	CG34341	Pde11	2.95846e-05	0.0142576	0.102	0.088	0.0443769
FBgn0262509	CG43079	nrm	3.2621e-05	0.0629043	0.153	0.116	0.0489316
FBgn0030505	CG11172	NFAT	3.64433e-05	0.0589784	0.265	0.233	0.054665
FBgn0085383	CG34354	CG34354	3.91228e-05	0.0639481	0.192	0.156	0.0586842
FBgn0085409	CG34380	smal	4.11716e-05	0.0410551	0.178	0.152	0.0617573
FBgn0037153	CG12673	olf413	4.57307e-05	0.0894949	0.197	0.158	0.068596
FBgn0261928	CG42795	CG42795	4.62799e-05	0.135929	0.327	0.266	0.0694198
FBgn0000097	CG3166	aop	4.84597e-05	0.0714802	0.213	0.175	0.0726895
FBgn0039064	CG4467	CG4467	5.78564e-05	0.339207	0.452	0.336	0.0867846
FBgn0002023	CG10699	Lim3	6.25604e-05	0.0443728	0.102	0.076	0.0938406
FBgn0014163	CG4609	fax	6.50468e-05	0.46484	0.504	0.349	0.0975702
FBgn0085382	CG34353	CG34353	6.78013e-05	0.0326094	0.186	0.167	0.101702
FBgn0004514	CG7485	Oct-TyrR	0.000101074	0.0233608	0.104	0.081	0.151611
FBgn0053143	CG33143	CG33143	0.000115615	-0.00492413	0.157	0.148	0.173422
FBgn0085420	CG34391	DIP-delta	0.00011894	0.0875735	0.129	0.1	0.178409
FBgn0011656	CG1429	Mef2	0.000119779	0.0720292	0.232	0.194	0.179668
FBgn0004595	CG17228	pros	0.000158823	2.50196	0.867	0.798	0.238235
FBgn0051221	CG31221	CG31221	0.000186935	0.926082	0.641	0.515	0.280403
FBgn0085413	CG34384	CG34384	0.00021693	0.0772503	0.272	0.238	0.325395
FBgn0052677	CG32677	X11Lbeta	0.000248068	0.072387	0.301	0.272	0.372102
FBgn0051760	CG31760	CG31760	0.000261438	0.0357936	0.108	0.085	0.392157
FBgn0008636	CG33152	hbn	0.000283912	0.0428538	0.11	0.091	0.425868
FBgn0000422	CG10697	Ddc	0.000312076	0.0923733	0.155	0.11	0.468114
FBgn0033405	CG13954	CG13954	0.000312262	0.0806924	0.245	0.208	0.468392
FBgn0287186	CG17594	scro	0.000363537	0.0646381	0.226	0.196	0.545306
FBgn0000635	CG3665	Fas2	0.000376067	0.113636	0.202	0.141	0.564101
FBgn0039420	CG6154	CG6154	0.000463589	0.0386527	0.135	0.113	0.695383
FBgn0270928	CG32848	VAChT	0.00047631	0.110638	0.164	0.106	0.714465
FBgn0262018	CG42829	CadN2	0.000478522	0.0403559	0.109	0.083	0.717783
FBgn0022382	CG15862	Pka-R2	0.000479362	0.120649	0.29	0.23	0.719043
FBgn0053516	CG33516	dpr3	0.000487169	-0.00508891	0.108	0.111	0.730754
FBgn0038498	CG14334	beat-IIa	0.000488937	0.0993683	0.25	0.206	0.733406
FBgn0051774	CG31774	fred	0.000544887	0.0328431	0.169	0.147	0.81733
FBgn0016797	CG9739	fz2	0.000569825	0.0851969	0.186	0.146	0.854737
FBgn0263930	CG4974	dally	0.000575568	0.0926251	0.24	0.192	0.863352
FBgn0013688	CR34096	mt:srRNA	0.000578062	0.0299399	0.125	0.102	0.867093
FBgn0036144	CG6207	GlcAT-P	0.000611587	0.0357766	0.155	0.134	0.91738
FBgn0015609	CG7100	CadN	0.000645332	0.181288	0.376	0.302	0.967997
FBgn0259213	CG42313	side-II	0.000649719	0.0799548	0.327	0.276	0.974579
FBgn0000633	CG17716	CG17716	0.000715109	0.359629	0.45	0.36	1
FBgn0051665	CG31665	wry	0.00076444	0.198473	0.409	0.354	1
FBgn0031414	CG33955	eys	0.000782076	0.182763	0.374	0.315	1
FBgn0000636	CG5803	Fas3	0.000799796	0.0683738	0.155	0.123	1
FBgn0028370	CG4192	kek3	0.000858768	0.0288843	0.167	0.146	1
FBgn0052432	CG32432	CG32432	0.000921132	0.0470617	0.302	0.275	1
FBgn0265182	CG44247	CG44247	0.000931749	0.0275487	0.152	0.131	1
FBgn0259242	CG42340	CG42340	0.000975521	0.00618599	0.274	0.262	1
FBgn0051361	CG31361	dpr17	0.00102715	0.0133104	0.138	0.125	1
FBgn0035092	CG3441	Nplp1	0.00107661	0.0555587	0.194	0.175	1
FBgn0030174	CG15312	CG15312	0.00110701	0.0669685	0.175	0.14	1
FBgn0016061	CG31062	side	0.00134422	0.206823	0.426	0.363	1
FBgn0031374	CG7337	Wdr62	0.0013708	0.223702	0.465	0.388	1
FBgn0085421	CG34392	Epac	0.00153749	0.0594928	0.177	0.143	1
FBgn0085395	CG34366	Shawl	0.00156238	0.0327653	0.161	0.145	1
FBgn0285952	CG3186	eEF5	0.00162429	0.0201572	0.262	0.247	1
FBgn0037676	CG8861	CG8861	0.00169752	0.0308426	0.322	0.31	1
FBgn0010313	CG2530	corto	0.00181256	0.0865495	0.305	0.261	1
FBgn0260003	CG34157	Dys	0.00182934	0.0405665	0.138	0.115	1
FBgn0265296	CG42256	Dscam2	0.00216698	0.606985	0.711	0.641	1
FBgn0004509	CG10772	Fur1	0.00222248	0.0206485	0.192	0.178	1
FBgn0037941	CG12594	CG12594	0.0022331	0.0705319	0.13	0.103	1
FBgn0085400	CG34371	side-V	0.00229643	-0.0101517	0.157	0.156	1
FBgn0033268	CG2297	Obp44a	0.00230533	0.237269	0.242	0.2	1
FBgn0033484	CG2269	CG2269	0.0024717	0.131964	0.67	0.656	1
FBgn0038237	CG8279	Pde6	0.00256609	0.265073	0.429	0.341	1
FBgn0030574	CG9413	sbm	0.0025923	0.042265	0.135	0.111	1
FBgn0263257	CG43395	Cngl	0.00282591	1.08347	0.811	0.725	1
FBgn0036844	CG14080	Mkp3	0.00289308	0.191603	0.423	0.351	1
FBgn0003274	CG4918	RpLP2	0.00291966	0.0565457	0.536	0.504	1
FBgn0014859	CG1864	Hr38	0.00315242	-0.091476	0.233	0.245	1
FBgn0266871	CR45332	lncRNA:CR45332	0.00350303	0.046337	0.115	0.092	1
FBgn0003896	CG10619	tup	0.00365794	-0.0071876	0.121	0.129	1
FBgn0035499	CG14996	Chd64	0.00417131	0.0154757	0.122	0.107	1
FBgn0039617	CG14521	DIP-gamma	0.00429644	0.00757832	0.111	0.098	1
FBgn0000064	CG6058	Ald1	0.00436543	-0.058799	0.723	0.717	1
FBgn0053147	CG33147	Hs3st-A	0.00464175	0.282286	0.478	0.358	1
FBgn0011661	CG10701	Moe	0.00480536	0.0012177	0.1	0.103	1
FBgn0000273	CG4379	Pka-C1	0.00555685	0.241522	0.577	0.511	1
FBgn0036935	CG14186	CG14186	0.00574026	0.0270217	0.155	0.132	1
FBgn0053202	CG33202	dpr11	0.00574991	0.0631136	0.272	0.245	1
FBgn0010113	CG15532	hdc	0.00619305	0.446247	0.418	0.262	1
FBgn0263353	CG11000	CG11000	0.00626509	0.233277	0.478	0.39	1
FBgn0000535	CG10952	eag	0.00652225	0.089729	0.269	0.232	1
FBgn0263289	CG43398	scrib	0.00677935	0.037789	0.14	0.117	1
FBgn0267253	CG32700	CG32700	0.00754595	0.0596572	0.354	0.338	1
FBgn0013973	CG1470	Gycbeta100B	0.00812866	-0.00225498	0.15	0.148	1
FBgn0010411	CG8900	RpS18	0.00835909	-0.453922	0.818	0.916	1
FBgn0003165	CG9755	pum	0.00853561	0.823488	0.787	0.675	1
FBgn0284243	CG9277	betaTub56D	0.0093131	0.0739546	0.344	0.293	1
FBgn0250908	CG42242	beat-VII	0.00937529	0.0620189	0.202	0.171	1
FBgn0037525	CG17816	CG17816	0.011266	0.144405	0.526	0.483	1
FBgn0284245	CG8280	eEF1alpha1	0.0116731	0.0389544	0.297	0.277	1
FBgn0001233	CG1242	Hsp83	0.0120832	0.00516841	0.517	0.512	1
FBgn0033192	CG2105	Corin	0.0121607	0.124785	0.379	0.333	1
FBgn0026160	CG7958	tna	0.0125246	0.298365	0.528	0.443	1
FBgn0260660	CG42543	Mp	0.0128869	0.068579	0.33	0.303	1
FBgn0036043	CG8177	CG8177	0.0135148	0.0370249	0.23	0.211	1
FBgn0264442	CG43860	ab	0.0136109	0.0612986	0.187	0.161	1
FBgn0052017	CG32017	CG32017	0.0143956	0.215537	0.658	0.636	1
FBgn0030723	CG14948	dpr18	0.0146886	0.011089	0.122	0.113	1
FBgn0261597	CG10305	RpS26	0.0159953	-0.278112	0.819	0.886	1
FBgn0259171	CG42276	Pde9	0.0169417	0.0932077	0.439	0.414	1
FBgn0031897	CG13784	CG13784	0.0175145	0.0386544	0.28	0.254	1
FBgn0053517	CG33517	Dop2R	0.0183125	0.805504	0.783	0.74	1
FBgn0264503	CG43902	CG43902	0.0194152	0.112525	0.23	0.188	1
FBgn0040297	CG9256	Nhe2	0.0195262	0.0192331	0.109	0.098	1
FBgn0015399	CG12283	kek1	0.0209366	0.308083	0.453	0.386	1
FBgn0014343	CG10601	mirr	0.0228766	0.054021	0.117	0.099	1
FBgn0031632	CG15628	CG15628	0.0233694	0.128396	0.401	0.354	1
FBgn0029897	CG3203	RpL17	0.0240967	-0.114149	0.627	0.671	1
FBgn0264386	CG15899	Ca-alpha1T	0.0242558	0.760726	0.513	0.416	1
FBgn0085384	CG34355	CG34355	0.0243009	0.200727	0.491	0.461	1
FBgn0085434	CG34405	NaCP60E	0.0244289	0.633707	0.72	0.614	1
FBgn0028496	CG30116	CG30116	0.0249785	0.0304397	0.426	0.445	1
FBgn0039380	CG5890	CG5890	0.0273617	-0.0168181	0.212	0.21	1
FBgn0052600	CG32600	dpr8	0.0295909	0.142556	0.381	0.346	1
FBgn0039647	CG14509	jus	0.0298844	0.193786	0.42	0.364	1
FBgn0001235	CG17117	hth	0.0303842	0.27217	0.364	0.284	1
FBgn0266851	CR45312	lncRNA:CR45312	0.0305718	0.0226181	0.29	0.263	1
FBgn0004880	CG1130	scrt	0.0305961	0.457794	0.888	0.898	1
FBgn0038156	CG14372	side-IV	0.0310129	0.0298811	0.116	0.1	1
FBgn0261089	CG5559	Sytalpha	0.0317255	0.0336545	0.113	0.092	1
FBgn0000037	CG4356	mAChR-A	0.0327751	0.0671367	0.301	0.269	1
FBgn0086677	CG30040	jeb	0.0334104	0.1411	0.314	0.268	1
FBgn0052062	CG32062	Rbfox1	0.0335387	0.795038	0.811	0.754	1
FBgn0027654	CG2239	jdp	0.0341612	0.232186	0.541	0.466	1
FBgn0014184	CG16747	Oda	0.0367971	0.169483	0.63	0.573	1
FBgn0036494	CG7250	Toll-6	0.0372831	0.189363	0.316	0.258	1
FBgn0085414	CG34385	dpr12	0.0401993	0.0795926	0.371	0.336	1
FBgn0003360	CG16944	sesB	0.0415253	0.0940463	0.813	0.873	1
FBgn0027608	CG2082	CG2082	0.0423418	0.090684	0.413	0.381	1
FBgn0265487	CG33197	mbl	0.0425645	0.424519	0.34	0.238	1
FBgn0024963	CG7535	GluClalpha	0.0440687	0.510134	0.67	0.575	1
FBgn0020907	CG14904	Scp2	0.0453606	-0.0673137	0.268	0.284	1
FBgn0010114	CG2040	hig	0.0457089	0.308088	0.51	0.426	1
FBgn0264815	CG44007	Pde1c	0.0469019	0.0715909	0.206	0.174	1
FBgn0263512	CG33980	Vsx2	0.04756	-0.0385293	0.117	0.138	1
FBgn0265597	CG44424	rad	0.0503951	0.204217	0.277	0.218	1
FBgn0030432	CG4404	CG4404	0.0517722	0.0272585	0.142	0.126	1
FBgn0260657	CG42540	CG42540	0.0521288	0.324756	0.576	0.494	1
FBgn0083975	CG34139	Nlg4	0.0573769	0.0626627	0.207	0.181	1
FBgn0050089	CG30089	CG30089	0.0574604	-0.00614352	0.116	0.117	1
FBgn0034138	CG8332	RpS15	0.0593492	-0.106265	0.862	0.903	1
FBgn0037171	CG14459	CG14459	0.0614617	0.0390682	0.108	0.093	1
FBgn0262738	CG3620	norpA	0.0631529	0.0431368	0.417	0.408	1
FBgn0010415	CG10497	Sdc	0.0655171	0.273181	0.644	0.566	1
FBgn0041605	CG32490	cpx	0.0667153	0.441125	0.993	0.997	1
FBgn0261244	CG33174	inaE	0.0730778	0.176033	0.433	0.382	1
FBgn0036927	CG7433	Gabat	0.0746765	0.0184255	0.202	0.183	1
FBgn0040823	CG14162	dpr6	0.0752631	0.0738643	0.231	0.202	1
FBgn0033544	CG7220	CG7220	0.0754799	-0.000252781	0.196	0.19	1
FBgn0250839	CG2016	CG2016	0.0762713	0.0767916	0.163	0.144	1
FBgn0000024	CG17907	Ace	0.083881	0.328427	0.492	0.404	1
FBgn0033438	CG1794	Mmp2	0.0912098	0.000657094	0.241	0.231	1
FBgn0003435	CG9218	sm	0.0934045	0.666113	0.838	0.836	1
FBgn0262869	CG43224	Gfrl	0.0983049	0.140891	0.353	0.293	1
FBgn0000411	CG5893	D	0.0990967	-0.0423007	0.171	0.189	1
FBgn0086758	CG31666	chinmo	0.100035	0.423516	0.664	0.565	1
FBgn0264574	CG43946	Glut1	0.106859	0.0898013	0.3	0.266	1
FBgn0265002	CG44153	CG44153	0.111396	0.0289481	0.21	0.195	1
FBgn0031971	CG7224	Sirup	0.114082	0.0200845	0.12	0.112	1
FBgn0263220	CG43388	Hk	0.11422	0.462693	0.713	0.624	1
FBgn0259244	CG42342	CG42342	0.118703	0.106078	0.312	0.275	1
FBgn0261871	CG33507	dpr2	0.11984	0.0314236	0.141	0.127	1
FBgn0003429	CG10693	slo	0.123512	0.400365	0.632	0.541	1
FBgn0038839	CG10830	Ktl	0.132706	-0.00772272	0.241	0.241	1
FBgn0053179	CG33179	beat-IIIb	0.133051	0.0642691	0.247	0.223	1
FBgn0261552	CG42670	ps	0.144487	0.418022	0.945	0.967	1
FBgn0267252	CG3694	Ggamma30A	0.146903	0.901966	0.959	0.964	1
FBgn0033196	CG1358	CG1358	0.154349	0.002767	0.135	0.138	1
FBgn0038653	CG18208	Octalpha2R	0.154389	0.0371441	0.363	0.362	1
FBgn0038282	CG33485	dpr9	0.154697	0.200221	0.329	0.261	1
FBgn0039584	CG14064	beat-VI	0.158083	0.0509706	0.198	0.176	1
FBgn0000042	CG4027	Act5C	0.15827	0.123508	0.517	0.491	1
FBgn0264339	CG43795	CG43795	0.159768	0.0149056	0.166	0.155	1
FBgn0267428	CG45781	DIP-lambda	0.164103	0.0640092	0.134	0.119	1
FBgn0259108	CG34387	futsch	0.169007	0.554135	0.803	0.788	1
FBgn0038826	CG17838	Syp	0.171567	0.263799	0.539	0.463	1
FBgn0031294	CG31795	IA-2	0.172365	2.04925	0.971	0.965	1
FBgn0264606	CG43955	Fife	0.173079	0.0538283	0.385	0.383	1
FBgn0267336	CG34360	Glut4EF	0.177189	0.980042	0.88	0.865	1
FBgn0037913	CG6783	fabp	0.179188	-0.0137042	0.127	0.122	1
FBgn0000116	CG32031	Argk	0.182063	0.137729	0.814	0.854	1
FBgn0005775	CG7503	Con	0.183369	0.450733	0.483	0.357	1
FBgn0001234	CR31400	lncRNA:Hsromega	0.189738	2.53084	0.972	0.979	1
FBgn0039349	CG4685	Ssadh	0.191977	0.00305817	0.111	0.103	1
FBgn0002593	CG4087	RpLP1	0.193474	-0.0894082	0.721	0.772	1
FBgn0013954	CG11001	Fkbp12	0.19792	-0.0231909	0.321	0.332	1
FBgn0032901	CG9339	sky	0.203376	0.131671	0.474	0.433	1
FBgn0039054	CG13830	Cow	0.20406	0.16586	0.391	0.333	1
FBgn0038063	CG33976	Octbeta2R	0.207896	0.233971	0.462	0.389	1
FBgn0032797	CG10186	Hasp	0.210607	0.102862	0.811	0.853	1
FBgn0010412	CG4464	RpS19a	0.215216	0.015213	0.26	0.251	1
FBgn0285948	CG15442	RpL27A	0.233649	0.078804	0.767	0.792	1
FBgn0083949	CG34113	side-III	0.245206	0.214547	0.392	0.322	1
FBgn0263392	CG43444	Tet	0.255805	0.140837	0.641	0.613	1
FBgn0030412	CG17762	Tomosyn	0.258171	0.249351	0.602	0.532	1
FBgn0263980	CG43729	Stacl	0.259078	0.0790289	0.502	0.476	1
FBgn0052647	CG32647	CG32647	0.25961	0.0412885	0.236	0.215	1
FBgn0027589	CG1688	CG1688	0.262133	0.027533	0.206	0.194	1
FBgn0039089	CG10152	beat-IV	0.264003	0.0185716	0.128	0.118	1
FBgn0004244	CG10537	Rdl	0.269654	0.80887	0.899	0.891	1
FBgn0085432	CG34403	pan	0.270891	0.746796	0.788	0.732	1
FBgn0013467	CG18285	igl	0.27637	0.391241	0.607	0.537	1
FBgn0011224	CG31000	heph	0.277653	0.608329	0.539	0.415	1
FBgn0034725	CG6044	CG6044	0.291524	-0.0654036	0.381	0.392	1
FBgn0044328	CG32052	CG32052	0.292549	0.00876816	0.132	0.121	1
FBgn0262782	CG5362	Mdh1	0.293577	0.0125643	0.176	0.168	1
FBgn0264087	CG43756	Slob	0.298788	0.000541576	0.161	0.156	1
FBgn0263995	CG43738	cpo	0.299318	0.313166	0.641	0.591	1
FBgn0083963	CG34127	Nlg3	0.309067	0.228848	0.533	0.48	1
FBgn0028875	CG32975	nAChRalpha5	0.317333	0.604096	0.683	0.591	1
FBgn0261549	CG42667	rdgA	0.326899	0.115096	0.366	0.331	1
FBgn0267001	CG42338	Ten-a	0.327011	1.1594	0.824	0.677	1
FBgn0000108	CG7727	Appl	0.331237	0.634129	0.788	0.778	1
FBgn0001091	CG12055	Gapdh1	0.333231	-0.0182209	0.341	0.349	1
FBgn0013576	CG32464	mtd	0.33419	0.386446	0.659	0.567	1
FBgn0032840	CG13968	sNPF	0.335506	0.0641733	0.209	0.194	1
FBgn0052698	CG32698	CARPB	0.338328	0.118724	0.134	0.122	1
FBgn0004611	CG4574	Plc21C	0.339259	0.0781646	0.374	0.341	1
FBgn0031835	CG11319	CG11319	0.341431	0.0721828	0.309	0.291	1
FBgn0032400	CG6770	CG6770	0.348861	0.370037	0.657	0.569	1
FBgn0263397	CG8585	Ih	0.362361	0.90556	0.86	0.835	1
FBgn0034978	CG3257	CG3257	0.364573	0.0275113	0.142	0.126	1
FBgn0034731	CG10384	CG10384	0.373257	0.0109997	0.117	0.109	1
FBgn0030090	CG12664	fend	0.374317	0.101749	0.292	0.25	1
FBgn0285944	CG9907	para	0.380387	1.08656	0.842	0.85	1
FBgn0000575	CG1007	emc	0.382405	0.0884229	0.426	0.407	1
FBgn0003423	CG1417	slgA	0.39156	0.219649	0.589	0.547	1
FBgn0033108	CG15236	CG15236	0.396285	0.0803492	0.256	0.234	1
FBgn0029814	CG15765	CG15765	0.403712	0.181058	0.366	0.298	1
FBgn0261836	CG42768	Msp300	0.404131	0.662925	0.728	0.653	1
FBgn0264001	CG43744	bru3	0.407672	0.369137	0.468	0.357	1
FBgn0243512	CG7850	puc	0.408969	0.00684818	0.137	0.138	1
FBgn0033250	CG14762	CG14762	0.437171	0.0571627	0.185	0.16	1
FBgn0036165	CG7533	chrb	0.440787	0.329618	0.61	0.514	1
FBgn0264895	CG44086	RapGAP1	0.445421	0.280121	0.465	0.393	1
FBgn0001078	CG4059	ftz-f1	0.466204	0.172242	0.444	0.416	1
FBgn0041707	CG1168	7B2	0.471317	0.030913	0.686	0.699	1
FBgn0035170	CG12191	dpr20	0.480647	0.015685	0.101	0.094	1
FBgn0260658	CG42541	CG42541	0.485385	-0.161658	0.498	0.51	1
FBgn0266801	CG45263	CG45263	0.491484	0.0731249	0.404	0.385	1
FBgn0004242	CG3139	Syt1	0.494658	0.704063	0.871	0.9	1
FBgn0017590	CG6669	klg	0.497773	0.126237	0.454	0.417	1
FBgn0001319	CG10197	kn	0.506067	0.0315969	0.107	0.113	1
FBgn0052264	CG32264	CG32264	0.520619	0.424531	0.695	0.63	1
FBgn0032833	CG10664	COX4	0.549029	-0.286479	0.74	0.817	1
FBgn0000036	CG5610	nAChRalpha1	0.555947	0.091335	0.355	0.336	1
FBgn0260943	CG32169	Rbp6	0.580967	1.54088	0.931	0.916	1
FBgn0004369	CG11516	Ptp99A	0.597552	0.488732	0.634	0.525	1
FBgn0010263	CG3151	Rbp9	0.604895	0.185798	0.375	0.323	1
FBgn0015400	CG4977	kek2	0.621468	0.0902437	0.379	0.352	1
FBgn0042630	CG32139	Sox21b	0.63102	0.0323658	0.169	0.164	1
FBgn0041094	CG7590	scyl	0.632681	0.175809	0.496	0.459	1
FBgn0040805	CG12355	CG12355	0.635257	-0.00765715	0.117	0.122	1
FBgn0262737	CG7437	mub	0.660364	0.639524	0.752	0.696	1
FBgn0004580	CG6702	Cbp53E	0.662083	0.683943	0.468	0.332	1
FBgn0264490	CG18389	Eip93F	0.720307	0.24862	0.372	0.328	1
FBgn0030897	CG5744	Frq1	0.724414	0.878045	0.757	0.635	1
FBgn0035032	CG4692	ATPsynF	0.730058	-0.0230628	0.778	0.817	1
FBgn0037874	CG4800	Tctp	0.736487	-0.024728	0.417	0.423	1
FBgn0086778	CG32538	nAChRalpha7	0.750422	0.251988	0.525	0.446	1
FBgn0083991	CG34155	CG34155	0.751503	0.030068	0.139	0.131	1
FBgn0028704	CG18660	Nckx30C	0.765031	0.195291	0.774	0.822	1
FBgn0261804	CG42750	CG42750	0.771277	0.0507161	0.36	0.347	1
FBgn0085391	CG34362	trv	0.780994	0.44736	0.505	0.418	1
FBgn0005658	CG7018	Ets65A	0.798329	0.0271213	0.216	0.212	1
FBgn0261788	CG42734	Ank2	0.816812	0.486456	0.685	0.59	1
FBgn0034753	CG2852	CG2852	0.838668	0.0337968	0.355	0.336	1
FBgn0264006	CG43749	dysc	0.888758	0.408689	0.767	0.731	1
FBgn0019643	CG3318	AANAT1	0.891555	0.00852387	0.103	0.097	1
FBgn0003380	CG12348	Sh	0.90852	1.43998	0.923	0.93	1
FBgn0027339	CG11352	jim	0.917378	1.28197	0.974	0.964	1
FBgn0010473	CG15427	tutl	0.92983	0.308178	0.601	0.52	1
FBgn0029761	CG10706	SK	0.93061	0.307648	0.493	0.404	1
FBgn0013981	CG3379	His4r	0.952238	0.258006	0.92	0.933	1
FBgn0085387	CG34358	shakB	0.96588	0.159941	0.342	0.292	1

## Sheet: Global_C4
FlyBaseID	GeneID	Gene symbol	p_val	avg_diff	pct.1	pct.2	p_val_adj
FBgn0019660	CR32665	lncRNA:roX2	0	-3.50373	0.011	0.916	0
FBgn0002940	CG4550	ninaE	2.3423e-51	-0.402122	0.09	0.241	3.51345e-48
FBgn0052057	CG32057	dpr10	1.57579e-39	0.167915	0.237	0.132	2.36368e-36
FBgn0004652	CG14307	fru	3.02222e-39	0.350196	0.292	0.134	4.53332e-36
FBgn0013995	CG5685	Calx	4.88972e-39	0.176753	0.178	0.068	7.33458e-36
FBgn0052683	CG32683	CG32683	1.51605e-37	0.167844	0.207	0.108	2.27407e-34
FBgn0029768	CG16752	SPR	4.24534e-36	0.166862	0.193	0.097	6.36801e-33
FBgn0011693	CG4899	Pdh	4.84042e-36	-0.17898	0.03	0.11	7.26063e-33
FBgn0058469	CR40469	lncRNA:CR40469	5.87553e-35	0.0737934	0.127	0.075	8.8133e-32
FBgn0004619	CG8442	GluRIA	6.76779e-32	0.18693	0.229	0.136	1.01517e-28
FBgn0000121	CG5962	Arr2	7.63248e-31	-0.200979	0.079	0.172	1.14487e-27
FBgn0052982	CG32982	CG32982	3.0219e-29	0.133377	0.155	0.078	4.53286e-26
FBgn0003301	CG9533	rut	5.25172e-28	0.106011	0.19	0.114	7.87759e-25
FBgn0264753	CG44011	Rgk1	2.95314e-26	0.106057	0.128	0.061	4.42971e-23
FBgn0083228	CG5907	Frq2	3.60042e-26	0.219668	0.253	0.147	5.40063e-23
FBgn0051690	CG31690	CG31690	9.30904e-26	0.125316	0.195	0.121	1.39636e-22
FBgn0002868	CG9470	MtnA	1.01166e-23	0.22354	0.315	0.196	1.51749e-20
FBgn0042696	CG2380	NfI	1.11602e-23	0.104269	0.227	0.151	1.67403e-20
FBgn0265595	CG44422	CG44422	1.75638e-23	0.240255	0.258	0.144	2.63457e-20
FBgn0283499	CG18402	InR	2.53295e-23	0.105261	0.182	0.113	3.79942e-20
FBgn0051324	CG31324	CG31324	8.03196e-23	0.228858	0.36	0.246	1.20479e-19
FBgn0262160	CG9932	CG9932	1.88729e-22	0.191957	0.307	0.204	2.83093e-19
FBgn0015777	CG9261	nrv2	8.20045e-22	0.0549379	0.156	0.113	1.23007e-18
FBgn0087012	CG1056	5-HT2A	1.96787e-21	0.122123	0.144	0.074	2.95181e-18
FBgn0260971	CG42594	CG42594	5.94581e-21	0.131907	0.175	0.11	8.91872e-18
FBgn0065099	CR33925	snRNA:7SK	7.51824e-21	3.15203	0.788	0.712	1.12774e-17
FBgn0019662	CG8593	qm	1.86303e-20	0.0590367	0.135	0.089	2.79455e-17
FBgn0040765	CG33473	luna	2.3914e-20	0.164965	0.304	0.218	3.5871e-17
FBgn0000547	CG12676	ed	2.49288e-20	0.129828	0.246	0.17	3.73932e-17
FBgn0051163	CG31163	SKIP	5.0018e-20	0.167114	0.262	0.177	7.5027e-17
FBgn0033987	CG12424	ckn	1.44378e-19	0.115616	0.177	0.104	2.16567e-16
FBgn0029824	CG3726	CG3726	1.82321e-19	0.125346	0.23	0.162	2.73481e-16
FBgn0260429	CG42524	CG42524	1.51584e-18	0.0765732	0.122	0.068	2.27376e-15
FBgn0261260	CG42611	mgl	2.05977e-18	0.0519747	0.114	0.076	3.08966e-15
FBgn0004395	CG4620	unk	4.61423e-18	0.110332	0.208	0.142	6.92134e-15
FBgn0038665	CG12269	euc	5.22352e-18	0.043601	0.106	0.076	7.83528e-15
FBgn0250867	CG42238	CG42238	7.4079e-18	0.120118	0.279	0.219	1.11118e-14
FBgn0038246	CG14853	CG14853	2.43868e-17	0.0859781	0.193	0.128	3.65803e-14
FBgn0052521	CG32521	CG32521	2.82794e-17	0.0462294	0.113	0.079	4.2419e-14
FBgn0259677	CG42346	CG42346	8.53299e-17	0.0788206	0.133	0.078	1.27995e-13
FBgn0033403	CG13739	CG13739	1.51547e-16	0.203985	0.211	0.119	2.2732e-13
FBgn0031299	CG4629	CG4629	1.5711e-16	0.0871823	0.172	0.116	2.35666e-13
FBgn0264000	CG43743	GluRIB	2.01997e-16	0.281506	0.31	0.195	3.02995e-13
FBgn0086604	CG12484	side-VIII	2.19533e-16	0.0736078	0.142	0.086	3.293e-13
FBgn0036789	CG13702	AstC-R2	6.08083e-16	0.121161	0.142	0.084	9.12125e-13
FBgn0085753	CR40596	28SrRNA-Psi:CR40596	3.55233e-15	0.061052	0.137	0.085	5.3285e-12
FBgn0015229	CG6575	glec	3.60114e-15	0.38487	0.45	0.323	5.40171e-12
FBgn0031738	CG9171	CG9171	4.7117e-15	0.0566037	0.102	0.057	7.06755e-12
FBgn0066101	CG31094	LpR1	6.40652e-15	0.0618532	0.124	0.076	9.60979e-12
FBgn0261988	CG17998	Gprk2	8.92603e-15	0.179299	0.347	0.264	1.3389e-11
FBgn0011666	CG5099	msi	2.10722e-14	0.915605	0.67	0.464	3.16084e-11
FBgn0002945	CG11614	nkd	2.3645e-14	0.165094	0.271	0.198	3.54676e-11
FBgn0010300	CG10719	brat	3.0605e-14	0.156869	0.262	0.184	4.59075e-11
FBgn0003091	CG6622	Pkc53E	4.27437e-14	0.398026	0.426	0.275	6.41156e-11
FBgn0052066	CG32066	CG32066	4.50181e-14	0.0455015	0.129	0.09	6.75271e-11
FBgn0259170	CG42275	alpha-Man-Ia	4.87121e-14	0.1053	0.226	0.172	7.30682e-11
FBgn0286778	CG46385	CG46385	5.07457e-14	0.155712	0.255	0.171	7.61185e-11
FBgn0004910	CG15855	Eip63F-1	1.45175e-13	0.0761019	0.171	0.115	2.17763e-10
FBgn0032666	CG5758	CG5758	3.20778e-13	0.0802424	0.168	0.117	4.81166e-10
FBgn0013718	CG33991	nuf	4.5943e-13	0.0573878	0.115	0.072	6.89145e-10
FBgn0035756	CG32381	unc-13-4A	1.08672e-12	0.0599724	0.136	0.09	1.63008e-09
FBgn0013733	CG18076	shot	1.14562e-12	0.117536	0.249	0.176	1.71842e-09
FBgn0036801	CG6896	MYPT-75D	1.5568e-12	0.105828	0.178	0.113	2.3352e-09
FBgn0050463	CG30463	Pgant9	1.72166e-12	0.128125	0.222	0.152	2.58249e-09
FBgn0015519	CG2302	nAChRalpha3	1.80829e-12	0.0746831	0.249	0.203	2.71244e-09
FBgn0029663	CG10804	CG10804	3.43875e-12	0.111825	0.183	0.115	5.15812e-09
FBgn0267910	CR34335	lncRNA:CR34335	3.57377e-12	9.09513	0.996	0.969	5.36066e-09
FBgn0000567	CG32180	Eip74EF	3.66804e-12	0.0371961	0.119	0.084	5.50206e-09
FBgn0085399	CG34370	CG34370	9.60184e-12	0.0568408	0.144	0.102	1.44028e-08
FBgn0019985	CG11144	mGluR	1.07984e-11	0.0451402	0.19	0.148	1.61975e-08
FBgn0001186	CG3001	Hex-A	1.1589e-11	0.745015	0.55	0.344	1.73835e-08
FBgn0039209	CG13624	REPTOR	1.16145e-11	0.0959179	0.252	0.197	1.74217e-08
FBgn0027356	CG8604	Amph	1.30476e-11	0.0485989	0.151	0.111	1.95714e-08
FBgn0028369	CG3653	kirre	2.91547e-11	0.278731	0.336	0.24	4.37321e-08
FBgn0031897	CG13784	CG13784	3.48661e-11	0.0355306	0.253	0.217	5.22992e-08
FBgn0264975	CG1634	Nrg	4.06166e-11	0.0368909	0.149	0.119	6.09249e-08
FBgn0033159	CG17800	Dscam1	6.49746e-11	0.0521872	0.102	0.065	9.74618e-08
FBgn0264090	CG43759	CG43759	8.2428e-11	0.0519478	0.108	0.075	1.23642e-07
FBgn0083950	CG34114	side-VI	8.80628e-11	0.317034	0.405	0.277	1.32094e-07
FBgn0020269	CG10145	mspo	1.04654e-10	0.0869332	0.183	0.134	1.56981e-07
FBgn0015774	CG10521	NetB	1.44336e-10	0.0733908	0.221	0.184	2.16504e-07
FBgn0052206	CG32206	CG32206	1.48424e-10	0.0865206	0.236	0.188	2.22636e-07
FBgn0040397	CG3655	CG3655	1.72773e-10	0.105019	0.211	0.15	2.59159e-07
FBgn0000179	CG3578	bi	2.01387e-10	0.171811	0.144	0.085	3.0208e-07
FBgn0083975	CG34139	Nlg4	2.80659e-10	0.0118235	0.174	0.149	4.20988e-07
FBgn0261698	CG42732	SLO2	3.15487e-10	0.10948	0.257	0.194	4.73231e-07
FBgn0039420	CG6154	CG6154	3.43843e-10	0.0414221	0.129	0.097	5.15765e-07
FBgn0085413	CG34384	CG34384	3.50848e-10	0.0571343	0.242	0.196	5.26272e-07
FBgn0031306	CG4577	CG4577	5.7611e-10	0.145652	0.19	0.124	8.64165e-07
FBgn0037153	CG12673	olf413	5.88686e-10	0.0911347	0.184	0.13	8.83029e-07
FBgn0052677	CG32677	X11Lbeta	7.17853e-10	0.0753404	0.287	0.238	1.07678e-06
FBgn0261113	CG17836	Xrp1	7.29045e-10	0.0789404	0.172	0.115	1.09357e-06
FBgn0260941	CG42318	app	7.40173e-10	0.0962108	0.197	0.144	1.11026e-06
FBgn0267668	CR46006	lncRNA:CR46006	7.64852e-10	0.111473	0.288	0.228	1.14728e-06
FBgn0037015	CG13253	cmpy	1.07606e-09	0.0605932	0.209	0.171	1.61408e-06
FBgn0014163	CG4609	fax	1.54335e-09	0.464782	0.507	0.328	2.31503e-06
FBgn0052204	CG32204	CG32204	1.67163e-09	0.0166209	0.139	0.123	2.50744e-06
FBgn0031736	CG11030	CG11030	2.18918e-09	0.0520895	0.117	0.079	3.28377e-06
FBgn0262473	CG5490	Tl	2.47663e-09	0.0569213	0.114	0.075	3.71494e-06
FBgn0024321	CG8524	NK7.1	3.01809e-09	0.0528004	0.139	0.096	4.52713e-06
FBgn0270928	CG32848	VAChT	4.9633e-09	-0.0269576	0.525	0.557	7.44495e-06
FBgn0036935	CG14186	CG14186	5.74841e-09	0.0375601	0.134	0.096	8.62262e-06
FBgn0051814	CG31814	DIP-kappa	6.13763e-09	0.1166	0.148	0.1	9.20644e-06
FBgn0001085	CG17697	fz	7.48936e-09	0.0632873	0.165	0.124	1.1234e-05
FBgn0267322	CR45758	lncRNA:CR45758	7.93429e-09	0.062608	0.114	0.077	1.19014e-05
FBgn0003499	CG7847	sr	8.28986e-09	0.0813611	0.126	0.077	1.24348e-05
FBgn0031016	CG12199	kek5	1.00475e-08	0.056042	0.135	0.092	1.50712e-05
FBgn0030272	CG15201	CG15201	1.29845e-08	0.0855041	0.158	0.11	1.94767e-05
FBgn0011818	CG9884	oaf	1.53405e-08	0.0428877	0.108	0.078	2.30108e-05
FBgn0284245	CG8280	eEF1alpha1	1.60427e-08	0.0320327	0.254	0.222	2.4064e-05
FBgn0261262	CG42613	CG42613	2.05827e-08	0.437992	0.456	0.325	3.08741e-05
FBgn0262593	CG43128	Shab	2.40066e-08	0.157048	0.327	0.253	3.60099e-05
FBgn0030505	CG11172	NFAT	2.58254e-08	0.0774727	0.241	0.194	3.87382e-05
FBgn0011656	CG1429	Mef2	2.67693e-08	0.067533	0.228	0.185	4.0154e-05
FBgn0052626	CG32626	AMPdeam	2.97349e-08	0.0249994	0.124	0.097	4.46024e-05
FBgn0004449	CG5723	Ten-m	3.35572e-08	0.0892614	0.244	0.198	5.03358e-05
FBgn0032629	CG15138	beat-IIIc	5.9716e-08	0.227509	0.298	0.225	8.95741e-05
FBgn0004168	CG16720	5-HT1A	6.77379e-08	0.0809287	0.114	0.071	0.000101607
FBgn0031770	CG13995	CG13995	6.92639e-08	0.0532132	0.132	0.089	0.000103896
FBgn0283451	CG11491	br	6.96725e-08	0.124339	0.105	0.06	0.000104509
FBgn0261046	CG31190	Dscam3	7.74825e-08	0.0435277	0.109	0.074	0.000116224
FBgn0265052	CG44167	St3	8.61783e-08	0.0639764	0.233	0.192	0.000129268
FBgn0264308	CG43778	CG43778	9.72536e-08	0.0549673	0.174	0.14	0.00014588
FBgn0023179	CG6438	amon	1.01618e-07	0.0712095	0.254	0.208	0.000152428
FBgn0031424	CG9887	VGlut	1.1541e-07	0.368405	0.25	0.158	0.000173115
FBgn0263773	CG43690	fok	1.18078e-07	0.0878592	0.236	0.186	0.000177118
FBgn0285963	CG46339	CG46339	1.49327e-07	0.0261719	0.101	0.076	0.00022399
FBgn0033405	CG13954	CG13954	1.95985e-07	0.0798397	0.243	0.199	0.000293978
FBgn0259111	CG42253	Ndae1	2.03928e-07	0.0160223	0.109	0.093	0.000305891
FBgn0024189	CG33141	sns	2.43987e-07	0.0458361	0.117	0.084	0.000365981
FBgn0004858	CG4220	elB	2.51432e-07	0.0409263	0.158	0.129	0.000377148
FBgn0039064	CG4467	CG4467	4.04487e-07	0.277806	0.428	0.314	0.00060673
FBgn0014859	CG1864	Hr38	4.05713e-07	0.0433774	0.257	0.208	0.00060857
FBgn0085412	CG34383	kmr	4.34362e-07	0.0803111	0.246	0.202	0.000651543
FBgn0052432	CG32432	CG32432	4.34618e-07	0.0368841	0.289	0.252	0.000651927
FBgn0265182	CG44247	CG44247	4.6215e-07	0.0307863	0.126	0.095	0.000693225
FBgn0261285	CG5629	Ppcs	5.77026e-07	0.0330043	0.115	0.087	0.000865538
FBgn0052600	CG32600	dpr8	6.04176e-07	0.206402	0.353	0.27	0.000906264
FBgn0035495	CG14989	CG14989	6.22774e-07	0.606543	0.528	0.465	0.000934161
FBgn0263706	CG43658	CG43658	1.05244e-06	0.00281692	0.125	0.123	0.00157867
FBgn0051221	CG31221	CG31221	1.07443e-06	2.80594	0.94	0.908	0.00161165
FBgn0085382	CG34353	CG34353	1.13946e-06	0.0877444	0.228	0.182	0.00170919
FBgn0085447	CG34418	sif	1.37221e-06	0.874215	0.681	0.508	0.00205832
FBgn0030574	CG9413	sbm	1.59658e-06	0.0396462	0.117	0.089	0.00239488
FBgn0261089	CG5559	Sytalpha	1.63215e-06	0.0430712	0.183	0.147	0.00244823
FBgn0029939	CG9650	CG9650	1.76517e-06	0.367998	0.433	0.358	0.00264775
FBgn0051619	CG31619	nolo	1.90193e-06	0.0708403	0.149	0.106	0.0028529
FBgn0037521	CG2993	CG2993	1.97557e-06	0.0812908	0.277	0.225	0.00296335
FBgn0085409	CG34380	smal	2.24511e-06	0.0227107	0.146	0.124	0.00336767
FBgn0264442	CG43860	ab	2.45816e-06	0.0553996	0.147	0.106	0.00368723
FBgn0261588	CG42698	pdm3	2.60574e-06	0.0833789	0.117	0.078	0.00390862
FBgn0038498	CG14334	beat-IIa	2.77359e-06	0.169228	0.289	0.221	0.00416039
FBgn0040532	CG8369	CG8369	3.23729e-06	0.0646382	0.164	0.134	0.00485594
FBgn0016797	CG9739	fz2	3.47898e-06	0.0848399	0.204	0.162	0.00521847
FBgn0263257	CG43395	Cngl	3.59419e-06	1.19207	0.787	0.69	0.00539129
FBgn0263994	CG43737	CG43737	3.73623e-06	0.347393	0.472	0.357	0.00560435
FBgn0036144	CG6207	GlcAT-P	3.97346e-06	0.0461782	0.163	0.133	0.0059602
FBgn0000037	CG4356	mAChR-A	4.57673e-06	0.0546161	0.3	0.27	0.0068651
FBgn0027598	CG31012	cindr	4.89801e-06	0.403362	0.532	0.43	0.00734701
FBgn0085384	CG34355	CG34355	7.49296e-06	0.07511	0.108	0.066	0.0112394
FBgn0085421	CG34392	Epac	7.91382e-06	0.0723965	0.213	0.164	0.0118707
FBgn0264503	CG43902	CG43902	9.10239e-06	0.161472	0.298	0.245	0.0136536
FBgn0085400	CG34371	side-V	9.23005e-06	0.0423529	0.146	0.109	0.0138451
FBgn0053143	CG33143	CG33143	1.07215e-05	0.0494421	0.236	0.196	0.0160823
FBgn0264574	CG43946	Glut1	1.0818e-05	0.0979286	0.313	0.263	0.016227
FBgn0033192	CG2105	Corin	1.10695e-05	0.0890074	0.271	0.217	0.0166042
FBgn0000097	CG3166	aop	1.2234e-05	0.0615994	0.18	0.135	0.018351
FBgn0052183	CG32183	Ccn	1.25408e-05	0.00825204	0.131	0.12	0.0188112
FBgn0261928	CG42795	CG42795	1.37091e-05	0.0787599	0.22	0.173	0.0205636
FBgn0037913	CG6783	fabp	1.53051e-05	-0.0789639	0.117	0.144	0.0229576
FBgn0000635	CG3665	Fas2	1.55243e-05	0.114072	0.175	0.119	0.0232864
FBgn0260003	CG34157	Dys	1.59744e-05	0.0273446	0.16	0.135	0.0239616
FBgn0066084	CG30425	RpL41	1.78647e-05	1.48805	0.816	0.591	0.0267971
FBgn0034286	CG33996	dpr13	2.46979e-05	0.278678	0.401	0.32	0.0370468
FBgn0264273	CG33960	Sema2b	3.00826e-05	0.0402887	0.122	0.1	0.0451239
FBgn0035816	CG13685	CG13685	3.12159e-05	0.0229502	0.166	0.148	0.0468238
FBgn0266100	CG44837	CG44837	3.17064e-05	0.0295845	0.114	0.094	0.0475597
FBgn0086680	CG10037	vvl	3.5016e-05	0.370396	0.231	0.181	0.0525241
FBgn0263289	CG43398	scrib	4.32005e-05	0.0335467	0.126	0.1	0.0648008
FBgn0052506	CG32506	CG32506	5.11484e-05	0.0241863	0.193	0.172	0.0767226
FBgn0036494	CG7250	Toll-6	5.83661e-05	0.136448	0.253	0.192	0.0875492
FBgn0259821	CG42402	CG42402	6.08125e-05	0.0944062	0.295	0.257	0.0912187
FBgn0011582	CG9652	Dop1R1	6.40011e-05	0.037946	0.107	0.079	0.0960016
FBgn0004198	CG11387	ct	6.86025e-05	1.36305	0.674	0.571	0.102904
FBgn0262614	CG43140	pyd	6.97718e-05	0.116537	0.212	0.172	0.104658
FBgn0263219	CG42330	Dscam4	7.08642e-05	0.0789871	0.222	0.188	0.106296
FBgn0036454	CG17839	CG17839	8.94243e-05	0.0903387	0.245	0.206	0.134137
FBgn0028370	CG4192	kek3	9.28431e-05	0.052544	0.137	0.101	0.139265
FBgn0259234	CG42332	Camta	9.80253e-05	0.0462124	0.146	0.113	0.147038
FBgn0250910	CG42244	Octbeta3R	9.81923e-05	0.0560836	0.161	0.126	0.147288
FBgn0260793	CG42573	2mit	0.00011416	0.0380487	0.13	0.105	0.17124
FBgn0033356	CG8229	CG8229	0.000120149	-0.0353463	0.1	0.123	0.180224
FBgn0040726	CG13439	dpr1	0.000147773	0.0692293	0.387	0.356	0.22166
FBgn0010412	CG4464	RpS19a	0.00015365	0.0195281	0.229	0.207	0.230475
FBgn0262509	CG43079	nrm	0.000162988	0.0385788	0.133	0.107	0.244482
FBgn0260660	CG42543	Mp	0.000177609	0.0466699	0.276	0.24	0.266413
FBgn0000636	CG5803	Fas3	0.000181166	0.052818	0.227	0.196	0.271749
FBgn0261871	CG33507	dpr2	0.00018762	0.0295112	0.113	0.086	0.28143
FBgn0260964	CG33528	Vmat	0.00019951	0.0131218	0.108	0.124	0.299265
FBgn0013973	CG1470	Gycbeta100B	0.000208167	0.0114715	0.124	0.11	0.31225
FBgn0035041	CG13594	CG13594	0.000245083	0.056848	0.114	0.078	0.367624
FBgn0051361	CG31361	dpr17	0.000245819	0.0291888	0.126	0.103	0.368729
FBgn0003360	CG16944	sesB	0.000282891	-0.00439165	0.754	0.838	0.424337
FBgn0259242	CG42340	CG42340	0.000299456	0.0132626	0.239	0.224	0.449184
FBgn0027589	CG1688	CG1688	0.000299789	0.0419083	0.157	0.128	0.449684
FBgn0003326	CG17579	sca	0.000304617	0.0172144	0.11	0.097	0.456925
FBgn0002643	CG8118	mam	0.000317634	0.0701075	0.175	0.138	0.47645
FBgn0052406	CG32406	PVRAP	0.000328812	0.00854264	0.106	0.097	0.493218
FBgn0259243	CG42341	Pka-R1	0.000378268	0.0315732	0.197	0.171	0.567402
FBgn0001078	CG4059	ftz-f1	0.00039218	0.176122	0.448	0.392	0.588271
FBgn0263511	CG4136	Vsx1	0.000430093	0.0317073	0.127	0.104	0.64514
FBgn0028645	CG7644	beat-Ib	0.000561765	0.0837607	0.293	0.261	0.842648
FBgn0263930	CG4974	dally	0.000585513	0.0712338	0.223	0.19	0.878269
FBgn0003274	CG4918	RpLP2	0.000623771	-0.0146981	0.501	0.483	0.935657
FBgn0004516	CG14994	Gad1	0.00076294	0.0902282	0.108	0.053	1
FBgn0033196	CG1358	CG1358	0.000811947	0.0244473	0.102	0.084	1
FBgn0000535	CG10952	eag	0.000834198	0.054401	0.262	0.236	1
FBgn0033368	CG13743	CG13743	0.000927641	0.0174367	0.122	0.114	1
FBgn0264339	CG43795	CG43795	0.000933919	0.039688	0.154	0.121	1
FBgn0010313	CG2530	corto	0.000948293	0.0845887	0.307	0.257	1
FBgn0267033	CG45477	mamo	0.000978106	0.734877	0.651	0.556	1
FBgn0261597	CG10305	RpS26	0.00103151	-0.256627	0.795	0.881	1
FBgn0264490	CG18389	Eip93F	0.00103741	0.240883	0.322	0.24	1
FBgn0264908	CG44099	pHCl-1	0.00136811	0.131986	0.319	0.267	1
FBgn0028481	CG4341	CG4341	0.00146745	0.0602878	0.189	0.158	1
FBgn0040823	CG14162	dpr6	0.00148292	0.0989719	0.343	0.303	1
FBgn0038839	CG10830	Ktl	0.00154048	0.0515306	0.241	0.201	1
FBgn0033446	CG1648	CG1648	0.00164184	0.0175662	0.12	0.103	1
FBgn0010114	CG2040	hig	0.00169156	0.257341	0.447	0.391	1
FBgn0262738	CG3620	norpA	0.00169383	0.0192018	0.384	0.385	1
FBgn0010452	CG11280	trn	0.00171479	0.0951238	0.165	0.13	1
FBgn0037956	CG6959	CG6959	0.00172757	0.0233872	0.102	0.083	1
FBgn0285952	CG3186	eEF5	0.00173737	0.00695535	0.241	0.234	1
FBgn0085383	CG34354	CG34354	0.00176342	0.0154732	0.208	0.205	1
FBgn0266801	CG45263	CG45263	0.0017751	-0.0175369	0.392	0.373	1
FBgn0000116	CG32031	Argk	0.0019304	0.15588	0.764	0.779	1
FBgn0035032	CG4692	ATPsynF	0.00195339	-6.82548e-05	0.746	0.781	1
FBgn0287186	CG17594	scro	0.00200261	0.0598854	0.33	0.301	1
FBgn0038980	CG6919	Octbeta1R	0.00214162	0.0606367	0.106	0.077	1
FBgn0004369	CG11516	Ptp99A	0.00223399	0.66375	0.645	0.498	1
FBgn0003380	CG12348	Sh	0.00226892	1.0283	0.908	0.925	1
FBgn0032797	CG10186	Hasp	0.00231584	0.125558	0.727	0.778	1
FBgn0034731	CG10384	CG10384	0.00237803	0.0409729	0.183	0.156	1
FBgn0000575	CG1007	emc	0.00247613	0.0194581	0.391	0.373	1
FBgn0261509	CG14351	haf	0.00273889	0.0409556	0.123	0.1	1
FBgn0029123	CG18024	SoxN	0.00321433	0.495851	0.53	0.475	1
FBgn0264087	CG43756	Slob	0.00323213	0.000916713	0.197	0.187	1
FBgn0259171	CG42276	Pde9	0.00349791	0.0302486	0.485	0.471	1
FBgn0051665	CG31665	wry	0.00350263	0.241548	0.396	0.316	1
FBgn0004509	CG10772	Fur1	0.0038781	0.0279967	0.126	0.107	1
FBgn0038826	CG17838	Syp	0.00474945	0.176884	0.474	0.407	1
FBgn0004595	CG17228	pros	0.00483327	1.99128	0.919	0.888	1
FBgn0031835	CG11319	CG11319	0.00546515	0.0605982	0.235	0.202	1
FBgn0034808	CG9896	CG9896	0.00556794	0.0674745	0.183	0.156	1
FBgn0010113	CG15532	hdc	0.00575139	0.441477	0.364	0.213	1
FBgn0023095	CG11282	caps	0.00618266	0.0324425	0.105	0.087	1
FBgn0000633	CG17716	CG17716	0.00628553	0.380012	0.497	0.405	1
FBgn0250908	CG42242	beat-VII	0.00660126	0.0606248	0.17	0.143	1
FBgn0267001	CG42338	Ten-a	0.00718488	1.29726	0.849	0.774	1
FBgn0085434	CG34405	NaCP60E	0.00747419	0.561267	0.627	0.496	1
FBgn0030432	CG4404	CG4404	0.00773962	-0.012553	0.098	0.107	1
FBgn0000303	CG12345	ChAT	0.00788474	0.00530452	0.327	0.311	1
FBgn0036043	CG8177	CG8177	0.0082558	0.0455337	0.229	0.207	1
FBgn0023534	CG17778	CG17778	0.00834049	0.036974	0.176	0.153	1
FBgn0033108	CG15236	CG15236	0.00915838	0.0236001	0.179	0.168	1
FBgn0032833	CG10664	COX4	0.00974016	-0.302217	0.705	0.804	1
FBgn0026160	CG7958	tna	0.0106866	0.279805	0.482	0.396	1
FBgn0013686	CR34094	mt:lrRNA	0.0114893	5.28253	0.933	0.768	1
FBgn0263397	CG8585	Ih	0.0133126	0.86251	0.854	0.806	1
FBgn0261574	CG7749	kug	0.0136535	0.0184675	0.102	0.09	1
FBgn0262782	CG5362	Mdh1	0.0143033	-0.00321669	0.129	0.126	1
FBgn0031414	CG33955	eys	0.0143561	0.181179	0.372	0.314	1
FBgn0261552	CG42670	ps	0.014656	0.245352	0.917	0.956	1
FBgn0014184	CG16747	Oda	0.0147173	0.148432	0.585	0.546	1
FBgn0031374	CG7337	Wdr62	0.0151636	0.204164	0.417	0.351	1
FBgn0265598	CG44425	Bx	0.0154574	0.0250119	0.119	0.104	1
FBgn0022382	CG15862	Pka-R2	0.0161403	0.0951999	0.275	0.226	1
FBgn0001235	CG17117	hth	0.0163095	0.31081	0.349	0.236	1
FBgn0267978	CG8376	ap	0.0165067	0.0122729	0.165	0.15	1
FBgn0085395	CG34366	Shawl	0.0165614	-0.00567653	0.124	0.126	1
FBgn0243512	CG7850	puc	0.0175931	0.0103673	0.103	0.093	1
FBgn0028644	CG4838	beat-Ic	0.0178312	0.513906	0.42	0.353	1
FBgn0020907	CG14904	Scp2	0.0223228	0.0759337	0.176	0.146	1
FBgn0042630	CG32139	Sox21b	0.0227246	0.0551088	0.107	0.084	1
FBgn0053202	CG33202	dpr11	0.0235699	0.0345217	0.205	0.184	1
FBgn0032151	CG4128	nAChRalpha6	0.0248094	0.971964	0.712	0.607	1
FBgn0004611	CG4574	Plc21C	0.0256384	0.109302	0.339	0.288	1
FBgn0044328	CG32052	CG32052	0.0275001	-0.000331819	0.124	0.12	1
FBgn0004244	CG10537	Rdl	0.0284547	0.61786	0.945	0.948	1
FBgn0260658	CG42541	CG42541	0.0294025	-0.343507	0.602	0.645	1
FBgn0000042	CG4027	Act5C	0.0298687	0.067642	0.47	0.437	1
FBgn0027608	CG2082	CG2082	0.0302122	0.0304603	0.366	0.346	1
FBgn0034978	CG3257	CG3257	0.0306882	0.0300633	0.128	0.105	1
FBgn0039054	CG13830	Cow	0.0315679	0.113289	0.399	0.348	1
FBgn0036927	CG7433	Gabat	0.033511	0.00464428	0.188	0.176	1
FBgn0001233	CG1242	Hsp83	0.0351176	-0.00938253	0.488	0.465	1
FBgn0052647	CG32647	CG32647	0.0355297	0.0369671	0.257	0.238	1
FBgn0085385	CG34356	bma	0.0372954	0.0403668	0.101	0.087	1
FBgn0039380	CG5890	CG5890	0.0396145	-0.0212973	0.265	0.27	1
FBgn0039089	CG10152	beat-IV	0.0397284	0.019706	0.105	0.089	1
FBgn0000273	CG4379	Pka-C1	0.0407467	0.270562	0.57	0.502	1
FBgn0000422	CG10697	Ddc	0.0423245	0.0178429	0.226	0.212	1
FBgn0031294	CG31795	IA-2	0.0428192	2.07127	0.975	0.966	1
FBgn0037676	CG8861	CG8861	0.0454713	0.127633	0.332	0.297	1
FBgn0015399	CG12283	kek1	0.047926	0.244551	0.416	0.351	1
FBgn0261788	CG42734	Ank2	0.0493855	0.361641	0.667	0.596	1
FBgn0015400	CG4977	kek2	0.0521035	0.102756	0.336	0.299	1
FBgn0003435	CG9218	sm	0.0546191	0.557042	0.831	0.862	1
FBgn0039938	CG11153	Sox102F	0.0579549	0.0114033	0.147	0.14	1
FBgn0036844	CG14080	Mkp3	0.058633	0.256833	0.464	0.381	1
FBgn0030174	CG15312	CG15312	0.0587312	0.0118771	0.133	0.127	1
FBgn0053517	CG33517	Dop2R	0.0595966	0.525702	0.746	0.747	1
FBgn0013467	CG18285	igl	0.0597728	0.391534	0.548	0.43	1
FBgn0261556	CG42674	CG42674	0.0631229	0.0735962	0.211	0.183	1
FBgn0261999	CG42817	Ca-Ma2d	0.0631495	0.0279307	0.102	0.086	1
FBgn0083963	CG34127	Nlg3	0.0638112	0.290107	0.621	0.566	1
FBgn0034725	CG6044	CG6044	0.065988	0.0275017	0.308	0.279	1
FBgn0033484	CG2269	CG2269	0.0684074	0.24962	0.552	0.528	1
FBgn0027654	CG2239	jdp	0.0787832	0.237566	0.566	0.506	1
FBgn0010263	CG3151	Rbp9	0.0796842	0.176397	0.369	0.308	1
FBgn0085407	CG34378	Pvf3	0.0829964	0.527452	0.516	0.424	1
FBgn0029814	CG15765	CG15765	0.0878312	0.11511	0.386	0.36	1
FBgn0085387	CG34358	shakB	0.0896677	0.156342	0.289	0.246	1
FBgn0010411	CG8900	RpS18	0.0941667	-0.381241	0.812	0.91	1
FBgn0000036	CG5610	nAChRalpha1	0.0942104	0.0979141	0.307	0.276	1
FBgn0033544	CG7220	CG7220	0.0946103	0.010905	0.167	0.158	1
FBgn0032901	CG9339	sky	0.0972326	0.15584	0.445	0.381	1
FBgn0029897	CG3203	RpL17	0.0990357	-0.11004	0.584	0.619	1
FBgn0038653	CG18208	Octalpha2R	0.101983	0.0680585	0.248	0.221	1
FBgn0000024	CG17907	Ace	0.102656	0.328392	0.588	0.538	1
FBgn0085414	CG34385	dpr12	0.102875	0.0540838	0.335	0.307	1
FBgn0264815	CG44007	Pde1c	0.103822	0.108657	0.305	0.271	1
FBgn0264001	CG43744	bru3	0.105603	0.358745	0.461	0.376	1
FBgn0039647	CG14509	jus	0.106951	0.177998	0.414	0.37	1
FBgn0004880	CG1130	scrt	0.117283	0.126335	0.88	0.937	1
FBgn0052017	CG32017	CG32017	0.122057	0.165491	0.386	0.305	1
FBgn0031632	CG15628	CG15628	0.123424	0.00335084	0.412	0.405	1
FBgn0267252	CG3694	Ggamma30A	0.124651	0.224044	0.978	0.983	1
FBgn0086778	CG32538	nAChRalpha7	0.126039	0.30348	0.44	0.329	1
FBgn0011224	CG31000	heph	0.127926	0.638113	0.567	0.42	1
FBgn0030897	CG5744	Frq1	0.130817	0.850917	0.716	0.558	1
FBgn0038237	CG8279	Pde6	0.136479	0.288486	0.398	0.318	1
FBgn0000411	CG5893	D	0.14031	0.0184749	0.108	0.092	1
FBgn0038282	CG33485	dpr9	0.145831	0.180846	0.377	0.321	1
FBgn0019650	CG11186	toy	0.146933	0.0313492	0.292	0.28	1
FBgn0039584	CG14064	beat-VI	0.151422	0.0417989	0.252	0.235	1
FBgn0265002	CG44153	CG44153	0.154905	0.0231898	0.22	0.204	1
FBgn0261258	CG6014	rgn	0.157317	0.0218559	0.163	0.151	1
FBgn0001234	CR31400	lncRNA:Hsromega	0.161288	2.22743	0.976	0.987	1
FBgn0016061	CG31062	side	0.166064	0.0809616	0.335	0.302	1
FBgn0053543	CG33543	CG33543	0.166715	0.155844	0.271	0.22	1
FBgn0263353	CG11000	CG11000	0.169682	0.200469	0.455	0.382	1
FBgn0041605	CG32490	cpx	0.171963	0.488572	0.985	0.991	1
FBgn0028704	CG18660	Nckx30C	0.178849	0.277253	0.738	0.78	1
FBgn0263392	CG43444	Tet	0.183322	0.116633	0.657	0.604	1
FBgn0000108	CG7727	Appl	0.187033	0.593172	0.798	0.825	1
FBgn0013576	CG32464	mtd	0.187704	0.326025	0.606	0.512	1
FBgn0015609	CG7100	CadN	0.188695	0.159496	0.371	0.323	1
FBgn0027339	CG11352	jim	0.189021	1.42183	0.975	0.981	1
FBgn0017590	CG6669	klg	0.191137	-0.0150088	0.446	0.43	1
FBgn0261244	CG33174	inaE	0.193586	0.170545	0.456	0.404	1
FBgn0086758	CG31666	chinmo	0.201251	0.373156	0.639	0.57	1
FBgn0051774	CG31774	fred	0.20268	0.0267859	0.258	0.257	1
FBgn0260943	CG32169	Rbp6	0.207213	1.2511	0.92	0.911	1
FBgn0013433	CG4846	beat-Ia	0.213636	-0.0156234	0.104	0.114	1
FBgn0024963	CG7535	GluClalpha	0.227329	0.392175	0.644	0.571	1
FBgn0033250	CG14762	CG14762	0.258374	0.0328934	0.403	0.388	1
FBgn0037525	CG17816	CG17816	0.260962	0.18515	0.446	0.378	1
FBgn0285948	CG15442	RpL27A	0.271966	0.0854815	0.75	0.774	1
FBgn0263512	CG33980	Vsx2	0.275623	0.00402408	0.178	0.187	1
FBgn0032840	CG13968	sNPF	0.279398	0.105776	0.233	0.23	1
FBgn0000064	CG6058	Ald1	0.281172	0.00779583	0.595	0.596	1
FBgn0267253	CG32700	CG32700	0.281804	0.0666099	0.244	0.227	1
FBgn0259213	CG42313	side-II	0.285552	0.0470707	0.306	0.278	1
FBgn0003165	CG9755	pum	0.296686	0.791964	0.747	0.654	1
FBgn0052062	CG32062	Rbfox1	0.296753	0.838423	0.862	0.827	1
FBgn0083949	CG34113	side-III	0.307029	0.283269	0.549	0.481	1
FBgn0085391	CG34362	trv	0.319747	0.618345	0.594	0.486	1
FBgn0265597	CG44424	rad	0.330183	0.18994	0.338	0.299	1
FBgn0261836	CG42768	Msp300	0.334564	0.362112	0.629	0.581	1
FBgn0050089	CG30089	CG30089	0.338006	0.0101988	0.103	0.092	1
FBgn0010415	CG10497	Sdc	0.339831	0.23121	0.627	0.543	1
FBgn0259244	CG42342	CG42342	0.340051	0.0598715	0.331	0.333	1
FBgn0013954	CG11001	Fkbp12	0.361285	-0.00110981	0.387	0.383	1
FBgn0030090	CG12664	fend	0.362554	0.0397713	0.236	0.223	1
FBgn0033358	CG8216	spab	0.364183	-0.0190115	0.097	0.103	1
FBgn0029761	CG10706	SK	0.367034	0.250569	0.418	0.339	1
FBgn0036165	CG7533	chrb	0.370141	0.279481	0.567	0.481	1
FBgn0003423	CG1417	slgA	0.400431	0.147978	0.384	0.316	1
FBgn0013981	CG3379	His4r	0.41557	0.290791	0.941	0.946	1
FBgn0285944	CG9907	para	0.420672	0.846083	0.817	0.833	1
FBgn0034753	CG2852	CG2852	0.423836	0.00281027	0.287	0.277	1
FBgn0039349	CG4685	Ssadh	0.426026	0.000327682	0.117	0.11	1
FBgn0003429	CG10693	slo	0.428211	0.36399	0.59	0.488	1
FBgn0010473	CG15427	tutl	0.432792	0.322492	0.555	0.458	1
FBgn0004242	CG3139	Syt1	0.455221	0.462881	0.793	0.857	1
FBgn0264006	CG43749	dysc	0.469072	0.419022	0.758	0.73	1
FBgn0037874	CG4800	Tctp	0.490337	-0.0381347	0.379	0.386	1
FBgn0005775	CG7503	Con	0.491113	0.471353	0.429	0.32	1
FBgn0264606	CG43955	Fife	0.492724	0.0771045	0.343	0.312	1
FBgn0284243	CG9277	betaTub56D	0.510632	0.0300397	0.298	0.275	1
FBgn0085432	CG34403	pan	0.527161	0.672152	0.738	0.665	1
FBgn0001091	CG12055	Gapdh1	0.532746	-0.0128966	0.285	0.291	1
FBgn0263995	CG43738	cpo	0.537447	0.334271	0.747	0.73	1
FBgn0041094	CG7590	scyl	0.539289	0.25185	0.502	0.444	1
FBgn0262737	CG7437	mub	0.543634	0.666377	0.778	0.73	1
FBgn0030412	CG17762	Tomosyn	0.549954	0.292224	0.569	0.46	1
FBgn0038063	CG33976	Octbeta2R	0.5511	0.247689	0.428	0.351	1
FBgn0265487	CG33197	mbl	0.55468	0.292514	0.353	0.29	1
FBgn0041707	CG1168	7B2	0.558786	0.0156957	0.621	0.631	1
FBgn0261804	CG42750	CG42750	0.572013	0.05788	0.337	0.315	1
FBgn0033268	CG2297	Obp44a	0.58718	0.162632	0.203	0.189	1
FBgn0028496	CG30116	CG30116	0.588906	0.0089501	0.447	0.436	1
FBgn0264386	CG15899	Ca-alpha1T	0.593532	0.648781	0.566	0.443	1
FBgn0263980	CG43729	Stacl	0.598514	0.145329	0.53	0.479	1
FBgn0262869	CG43224	Gfrl	0.646991	0.176581	0.455	0.411	1
FBgn0004580	CG6702	Cbp53E	0.658301	0.946808	0.679	0.563	1
FBgn0034138	CG8332	RpS15	0.687923	-0.0762834	0.849	0.89	1
FBgn0028875	CG32975	nAChRalpha5	0.711307	0.59447	0.705	0.614	1
FBgn0259108	CG34387	futsch	0.732023	0.527569	0.847	0.832	1
FBgn0263220	CG43388	Hk	0.741657	0.454686	0.703	0.625	1
FBgn0032400	CG6770	CG6770	0.757514	0.42364	0.671	0.558	1
FBgn0261549	CG42667	rdgA	0.757801	0.108169	0.3	0.267	1
FBgn0053179	CG33179	beat-IIIb	0.76363	0.00935476	0.293	0.287	1
FBgn0053147	CG33147	Hs3st-A	0.782424	0.29545	0.678	0.6	1
FBgn0267336	CG34360	Glut4EF	0.823608	0.86783	0.85	0.864	1
FBgn0086677	CG30040	jeb	0.824694	0.223894	0.3	0.245	1
FBgn0250839	CG2016	CG2016	0.84465	0.0194964	0.141	0.134	1
FBgn0266851	CR45312	lncRNA:CR45312	0.848102	-0.00159675	0.21	0.214	1
FBgn0264895	CG44086	RapGAP1	0.87615	0.211478	0.458	0.408	1
FBgn0002593	CG4087	RpLP1	0.913438	-0.100571	0.717	0.765	1
FBgn0033438	CG1794	Mmp2	0.93297	-0.0127065	0.182	0.18	1
FBgn0265296	CG42256	Dscam2	0.938043	0.397675	0.668	0.613	1
FBgn0260657	CG42540	CG42540	0.939284	0.331415	0.687	0.609	1
FBgn0052264	CG32264	CG32264	0.986303	0.399113	0.649	0.55	1

## Sheet: Global_C5
FlyBaseID	GeneID	Gene symbol	p_val	avg_diff	pct.1	pct.2	p_val_adj
FBgn0019660	CR32665	lncRNA:roX2	0	-1.74224	0.005	0.683	0
FBgn0002940	CG4550	ninaE	2.48459e-33	-0.234918	0.092	0.216	3.72689e-30
FBgn0087002	CG11064	apolpp	1.54502e-31	0.0774217	0.13	0.059	2.31753e-28
FBgn0058469	CR40469	lncRNA:CR40469	1.0253e-29	0.0710507	0.138	0.077	1.53796e-26
FBgn0004595	CG17228	pros	3.16715e-24	12.1058	0.992	0.987	4.75073e-21
FBgn0036789	CG13702	AstC-R2	4.83258e-24	0.129091	0.18	0.098	7.24888e-21
FBgn0052683	CG32683	CG32683	3.87514e-23	0.18941	0.265	0.159	5.81272e-20
FBgn0052057	CG32057	dpr10	1.34754e-22	0.131381	0.236	0.15	2.02131e-19
FBgn0050115	CG30115	GEFmeso	3.14367e-22	0.0689868	0.118	0.068	4.71551e-19
FBgn0260429	CG42524	CG42524	1.27523e-16	0.0959142	0.188	0.125	1.91284e-13
FBgn0052982	CG32982	CG32982	1.7149e-16	0.118346	0.198	0.125	2.57235e-13
FBgn0260971	CG42594	CG42594	2.5643e-16	0.275719	0.355	0.207	3.84645e-13
FBgn0004619	CG8442	GluRIA	3.63307e-15	0.2254	0.32	0.209	5.44961e-12
FBgn0000121	CG5962	Arr2	4.11328e-14	-0.0935814	0.084	0.144	6.16992e-11
FBgn0261260	CG42611	mgl	4.88352e-14	0.125614	0.237	0.154	7.32527e-11
FBgn0262473	CG5490	Tl	1.9038e-13	0.112603	0.209	0.129	2.85569e-10
FBgn0013995	CG5685	Calx	5.95828e-13	0.166813	0.306	0.213	8.93742e-10
FBgn0013688	CR34096	mt:srRNA	9.59108e-13	0.0830607	0.156	0.091	1.43866e-09
FBgn0283651	CG46301	CG46301	1.60892e-12	0.24181	0.396	0.307	2.41338e-09
FBgn0052521	CG32521	CG32521	2.17739e-12	0.0628736	0.142	0.095	3.26609e-09
FBgn0029768	CG16752	SPR	3.87314e-12	0.153299	0.202	0.128	5.8097e-09
FBgn0033987	CG12424	ckn	9.27688e-12	0.0557376	0.169	0.124	1.39153e-08
FBgn0002543	CG5481	robo2	2.24021e-11	0.213593	0.204	0.133	3.36032e-08
FBgn0051690	CG31690	CG31690	2.88056e-11	0.125235	0.251	0.173	4.32084e-08
FBgn0083228	CG5907	Frq2	4.00768e-11	0.345838	0.462	0.324	6.01152e-08
FBgn0264753	CG44011	Rgk1	4.49129e-11	0.0672536	0.18	0.135	6.73693e-08
FBgn0004573	CG12073	5-HT7	1.00615e-10	0.0630327	0.161	0.114	1.50923e-07
FBgn0040877	CG12994	CG12994	1.07137e-10	0.062936	0.107	0.06	1.60705e-07
FBgn0001234	CR31400	lncRNA:Hsromega	1.22182e-10	3.11141	0.996	0.996	1.83273e-07
FBgn0259677	CG42346	CG42346	2.02118e-10	0.0863923	0.187	0.137	3.03178e-07
FBgn0004395	CG4620	unk	2.54875e-10	0.11123	0.255	0.184	3.82313e-07
FBgn0283499	CG18402	InR	6.432e-10	0.0669385	0.253	0.208	9.648e-07
FBgn0267322	CR45758	lncRNA:CR45758	7.96535e-10	0.122801	0.246	0.179	1.1948e-06
FBgn0020621	CG2049	Pkn	1.5578e-09	0.0354811	0.121	0.095	2.33669e-06
FBgn0003301	CG9533	rut	1.79984e-09	0.114218	0.266	0.189	2.69976e-06
FBgn0031299	CG4629	CG4629	2.24175e-09	0.0534834	0.156	0.114	3.36262e-06
FBgn0267431	CG45784	Myo81F	3.94943e-09	0.0573516	0.122	0.082	5.92415e-06
FBgn0264090	CG43759	CG43759	6.17477e-09	0.179547	0.295	0.219	9.26216e-06
FBgn0037963	CG6977	Cad87A	1.27875e-08	0.0455829	0.123	0.09	1.91813e-05
FBgn0002945	CG11614	nkd	1.28438e-08	0.148596	0.346	0.27	1.92657e-05
FBgn0037475	CG33323	Fer1	1.34553e-08	-0.0150453	0.127	0.107	2.0183e-05
FBgn0087012	CG1056	5-HT2A	1.96931e-08	0.0704322	0.117	0.075	2.95397e-05
FBgn0013718	CG33991	nuf	2.20422e-08	0.0283161	0.103	0.079	3.30632e-05
FBgn0261090	CG42333	Sytbeta	2.75924e-08	0.0409476	0.222	0.194	4.13886e-05
FBgn0033368	CG13743	CG13743	2.79068e-08	0.0710224	0.238	0.188	4.18602e-05
FBgn0050361	CG30361	mtt	6.7409e-08	0.0632741	0.166	0.125	0.000101113
FBgn0085385	CG34356	bma	8.90094e-08	0.221928	0.39	0.306	0.000133514
FBgn0004882	CG10868	orb	8.93911e-08	0.0640009	0.111	0.062	0.000134087
FBgn0004168	CG16720	5-HT1A	2.49611e-07	0.100742	0.289	0.234	0.000374416
FBgn0031294	CG31795	IA-2	3.08468e-07	6.01278	0.997	0.997	0.000462701
FBgn0031530	CG3254	Pgant2	3.10937e-07	0.102007	0.204	0.138	0.000466406
FBgn0265194	CG44240	Trpm	3.4957e-07	0.0570586	0.165	0.122	0.000524354
FBgn0031738	CG9171	CG9171	4.47882e-07	0.04963	0.156	0.123	0.000671824
FBgn0250869	CG42240	CG42240	4.94701e-07	0.0399036	0.118	0.082	0.000742052
FBgn0262614	CG43140	pyd	5.07802e-07	0.14441	0.298	0.234	0.000761703
FBgn0052066	CG32066	CG32066	5.08858e-07	0.0548153	0.186	0.143	0.000763287
FBgn0053087	CG33087	LRP1	5.27702e-07	0.0451309	0.144	0.11	0.000791553
FBgn0264442	CG43860	ab	6.22358e-07	-0.0050342	0.302	0.278	0.000933537
FBgn0004652	CG14307	fru	9.15775e-07	0.424069	0.302	0.176	0.00137366
FBgn0085420	CG34391	DIP-delta	1.9007e-06	0.121323	0.272	0.207	0.00285105
FBgn0020269	CG10145	mspo	2.36191e-06	0.0981441	0.26	0.203	0.00354286
FBgn0035495	CG14989	CG14989	2.41372e-06	0.520746	0.356	0.274	0.00362057
FBgn0250867	CG42238	CG42238	3.41155e-06	0.0977896	0.212	0.144	0.00511733
FBgn0264794	CR44024	lncRNA:CR44024	3.61036e-06	0.149005	0.43	0.369	0.00541554
FBgn0040765	CG33473	luna	3.6564e-06	0.247189	0.395	0.302	0.00548461
FBgn0085399	CG34370	CG34370	3.67103e-06	0.0452149	0.155	0.119	0.00550654
FBgn0019662	CG8593	qm	3.73184e-06	0.06579	0.172	0.127	0.00559776
FBgn0033159	CG17800	Dscam1	4.57561e-06	0.105122	0.311	0.241	0.00686342
FBgn0033403	CG13739	CG13739	4.66975e-06	0.18266	0.302	0.209	0.00700462
FBgn0000547	CG12676	ed	5.07001e-06	0.128982	0.29	0.223	0.00760502
FBgn0285926	CG1691	Imp	5.55586e-06	0.142581	0.114	0.057	0.0083338
FBgn0267910	CR34335	lncRNA:CR34335	5.94101e-06	8.69474	0.979	0.891	0.00891151
FBgn0085426	CG34397	Rgk3	6.26841e-06	0.0669667	0.13	0.082	0.00940261
FBgn0051324	CG31324	CG31324	6.77812e-06	0.095691	0.191	0.119	0.0101672
FBgn0259170	CG42275	alpha-Man-Ia	7.54352e-06	0.0790092	0.23	0.173	0.0113153
FBgn0034897	CG11299	Sesn	9.72774e-06	0.0493648	0.129	0.101	0.0145916
FBgn0086604	CG12484	side-VIII	1.01049e-05	0.0861522	0.244	0.198	0.0151573
FBgn0267001	CG42338	Ten-a	1.14721e-05	1.90426	0.905	0.808	0.0172081
FBgn0259212	CG42312	cno	1.16898e-05	0.0595489	0.143	0.101	0.0175347
FBgn0038246	CG14853	CG14853	1.21242e-05	0.0542042	0.183	0.139	0.0181864
FBgn0038542	CG7431	TyrR	1.28733e-05	0.072324	0.129	0.091	0.01931
FBgn0029761	CG10706	SK	2.13303e-05	0.552321	0.682	0.554	0.0319955
FBgn0051092	CG31092	LpR2	2.14195e-05	0.04963	0.159	0.118	0.0321292
FBgn0038641	CG7708	ChT	2.25935e-05	0.109003	0.322	0.267	0.0338903
FBgn0026411	CG11354	Lim1	2.61512e-05	0.38039	0.329	0.261	0.0392268
FBgn0025525	CG9102	bab2	2.67257e-05	0.083915	0.163	0.118	0.0400885
FBgn0014859	CG1864	Hr38	2.91819e-05	-0.122823	0.309	0.295	0.0437729
FBgn0034753	CG2852	CG2852	3.14727e-05	-0.0866952	0.416	0.467	0.047209
FBgn0051163	CG31163	SKIP	3.40366e-05	0.272358	0.441	0.35	0.0510549
FBgn0000636	CG5803	Fas3	3.51588e-05	0.046434	0.283	0.247	0.0527382
FBgn0085753	CR40596	28SrRNA-Psi:CR40596	3.75704e-05	0.0523527	0.149	0.11	0.0563555
FBgn0016797	CG9739	fz2	4.1163e-05	0.103353	0.319	0.26	0.0617445
FBgn0031016	CG12199	kek5	4.36968e-05	0.0500071	0.133	0.096	0.0655452
FBgn0052698	CG32698	CARPB	4.60096e-05	0.119036	0.164	0.127	0.0690144
FBgn0029824	CG3726	CG3726	4.84927e-05	0.0765631	0.181	0.137	0.072739
FBgn0052204	CG32204	CG32204	5.35603e-05	0.0766732	0.135	0.091	0.0803405
FBgn0052206	CG32206	CG32206	5.39375e-05	0.0861773	0.32	0.272	0.0809063
FBgn0264386	CG15899	Ca-alpha1T	7.07059e-05	1.24042	0.743	0.638	0.106059
FBgn0052626	CG32626	AMPdeam	9.95221e-05	0.0513662	0.191	0.155	0.149283
FBgn0260003	CG34157	Dys	0.000111704	0.0392716	0.215	0.186	0.167556
FBgn0035173	CG13907	CG13907	0.000116013	0.0290424	0.108	0.081	0.174019
FBgn0066084	CG30425	RpL41	0.000130587	1.8856	0.832	0.609	0.195881
FBgn0051475	CG31475	CG31475	0.00013454	0.0250408	0.111	0.09	0.201809
FBgn0065099	CR33925	snRNA:7SK	0.000147454	1.03685	0.785	0.677	0.221181
FBgn0015519	CG2302	nAChRalpha3	0.000149094	0.15541	0.318	0.235	0.223641
FBgn0012344	CG8348	Dh44	0.000166727	0.107491	0.104	0.07	0.250091
FBgn0030913	CG6123	CG6123	0.000174735	0.203933	0.373	0.296	0.262103
FBgn0085390	CG34361	Dgk	0.000187634	0.0318747	0.116	0.093	0.281451
FBgn0265595	CG44422	CG44422	0.000223753	0.204124	0.351	0.252	0.335629
FBgn0261588	CG42698	pdm3	0.000224296	0.129044	0.313	0.267	0.336444
FBgn0261046	CG31190	Dscam3	0.000232565	0.0622616	0.239	0.197	0.348848
FBgn0051814	CG31814	DIP-kappa	0.000238885	0.0791245	0.193	0.153	0.358327
FBgn0085387	CG34358	shakB	0.000243995	0.383534	0.594	0.53	0.365992
FBgn0052183	CG32183	Ccn	0.000259142	0.0761587	0.188	0.139	0.388713
FBgn0024944	CG3856	Oamb	0.000266504	0.0304475	0.119	0.095	0.399755
FBgn0036801	CG6896	MYPT-75D	0.000266831	0.119246	0.294	0.238	0.400247
FBgn0262738	CG3620	norpA	0.000272961	0.152833	0.539	0.515	0.409442
FBgn0261285	CG5629	Ppcs	0.000297068	0.0712036	0.226	0.186	0.445602
FBgn0015777	CG9261	nrv2	0.000344867	0.0644031	0.17	0.119	0.5173
FBgn0031306	CG4577	CG4577	0.000356328	0.190126	0.36	0.285	0.534492
FBgn0032797	CG10186	Hasp	0.000465388	-0.123259	0.76	0.796	0.698082
FBgn0034138	CG8332	RpS15	0.00049005	-0.0636169	0.774	0.82	0.735075
FBgn0264975	CG1634	Nrg	0.000497088	0.0778178	0.27	0.218	0.745632
FBgn0032629	CG15138	beat-IIIc	0.000506737	0.328553	0.433	0.342	0.760106
FBgn0263131	CG43373	CG43373	0.000514664	0.028616	0.121	0.097	0.771995
FBgn0050463	CG30463	Pgant9	0.00053547	0.118212	0.294	0.232	0.803205
FBgn0260941	CG42318	app	0.000604484	0.0851168	0.211	0.161	0.906726
FBgn0001186	CG3001	Hex-A	0.000721156	0.697168	0.555	0.389	1
FBgn0259244	CG42342	CG42342	0.000747059	-0.0221933	0.443	0.448	1
FBgn0051191	CG31191	CG31191	0.000761313	0.0408129	0.122	0.095	1
FBgn0259789	CG12701	zld	0.000763562	0.0894166	0.196	0.156	1
FBgn0261262	CG42613	CG42613	0.000845986	0.540237	0.586	0.442	1
FBgn0259245	CG42343	DIP-beta	0.000858229	0.0563244	0.18	0.158	1
FBgn0051721	CG31721	Trim9	0.000972307	0.039318	0.113	0.085	1
FBgn0040397	CG3655	CG3655	0.000997861	0.017672	0.176	0.17	1
FBgn0015774	CG10521	NetB	0.00111231	0.228682	0.347	0.268	1
FBgn0027654	CG2239	jdp	0.00127918	0.270331	0.809	0.775	1
FBgn0264308	CG43778	CG43778	0.0013194	0.151915	0.356	0.286	1
FBgn0036934	CG7395	sNPF-R	0.00132283	0.0515167	0.112	0.074	1
FBgn0003499	CG7847	sr	0.00135201	0.0669874	0.218	0.186	1
FBgn0033268	CG2297	Obp44a	0.0014382	0.0969253	0.197	0.151	1
FBgn0085382	CG34353	CG34353	0.00172882	0.0566737	0.24	0.207	1
FBgn0042696	CG2380	NfI	0.00174411	0.0888878	0.233	0.172	1
FBgn0004198	CG11387	ct	0.00175179	0.402977	0.247	0.132	1
FBgn0283451	CG11491	br	0.00192924	0.219228	0.29	0.263	1
FBgn0264001	CG43744	bru3	0.00193405	1.33114	0.858	0.819	1
FBgn0010434	CG11949	cora	0.00200449	0.00577894	0.186	0.184	1
FBgn0259216	CG42316	RhoGAP102A	0.0020322	-0.0104503	0.131	0.14	1
FBgn0263706	CG43658	CG43658	0.00215099	0.082109	0.185	0.14	1
FBgn0003435	CG9218	sm	0.00227438	1.49907	0.941	0.93	1
FBgn0033446	CG1648	CG1648	0.00229726	-0.0139072	0.214	0.218	1
FBgn0261928	CG42795	CG42795	0.00232567	0.101112	0.301	0.232	1
FBgn0023095	CG11282	caps	0.00248202	0.035488	0.176	0.151	1
FBgn0085397	CG34368	Fili	0.00248929	0.0518092	0.151	0.118	1
FBgn0003380	CG12348	Sh	0.0026236	2.02426	0.971	0.959	1
FBgn0262160	CG9932	CG9932	0.00266995	0.0612591	0.227	0.184	1
FBgn0260442	CG6831	rhea	0.0026892	0.0501185	0.171	0.139	1
FBgn0041097	CG5423	robo3	0.00269027	0.030405	0.184	0.16	1
FBgn0000179	CG3578	bi	0.00280148	0.239569	0.26	0.201	1
FBgn0051760	CG31760	CG31760	0.0028228	0.0620111	0.228	0.194	1
FBgn0011818	CG9884	oaf	0.00284272	0.0571921	0.172	0.136	1
FBgn0041605	CG32490	cpx	0.00285123	0.555101	0.907	0.894	1
FBgn0085410	CG34381	TrissinR	0.0028725	0.0440972	0.115	0.082	1
FBgn0019985	CG11144	mGluR	0.00300957	0.176167	0.383	0.327	1
FBgn0040153	CG32597	l(1)G0469	0.00306651	0.0294559	0.112	0.09	1
FBgn0263773	CG43690	fok	0.00355296	0.110403	0.231	0.17	1
FBgn0261574	CG7749	kug	0.00356463	0.0702852	0.208	0.163	1
FBgn0013981	CG3379	His4r	0.00357173	0.123141	0.905	0.939	1
FBgn0085384	CG34355	CG34355	0.0036851	0.112553	0.244	0.18	1
FBgn0051646	CG31646	DIP-theta	0.00376943	0.139362	0.227	0.179	1
FBgn0066101	CG31094	LpR1	0.00381803	0.0948558	0.282	0.236	1
FBgn0052647	CG32647	CG32647	0.0039527	0.0920018	0.253	0.193	1
FBgn0260657	CG42540	CG42540	0.00403016	0.405966	0.776	0.717	1
FBgn0027356	CG8604	Amph	0.00409309	0.0365642	0.144	0.115	1
FBgn0025382	CG14791	Rab27	0.004228	-0.0315762	0.137	0.165	1
FBgn0086359	CG3953	Invadolysin	0.0043087	0.0226709	0.17	0.151	1
FBgn0265052	CG44167	St3	0.00435329	0.0349484	0.158	0.131	1
FBgn0003274	CG4918	RpLP2	0.00436038	-0.000946138	0.58	0.605	1
FBgn0000422	CG10697	Ddc	0.00517289	0.0286033	0.612	0.617	1
FBgn0264273	CG33960	Sema2b	0.0052299	0.121337	0.296	0.246	1
FBgn0028369	CG3653	kirre	0.00544582	0.208936	0.369	0.277	1
FBgn0051619	CG31619	nolo	0.00607164	0.100436	0.293	0.238	1
FBgn0028888	CG4168	CG4168	0.00620944	0.0422855	0.157	0.123	1
FBgn0024189	CG33141	sns	0.00680161	0.0338047	0.18	0.154	1
FBgn0265597	CG44424	rad	0.00683057	0.784671	0.705	0.642	1
FBgn0015400	CG4977	kek2	0.00724716	0.0337295	0.382	0.357	1
FBgn0003326	CG17579	sca	0.00749054	0.0361542	0.154	0.125	1
FBgn0031424	CG9887	VGlut	0.00758872	0.168871	0.161	0.118	1
FBgn0030174	CG15312	CG15312	0.00784603	0.0600131	0.232	0.191	1
FBgn0053516	CG33516	dpr3	0.00799368	0.024089	0.153	0.132	1
FBgn0011666	CG5099	msi	0.00826345	0.542217	0.563	0.385	1
FBgn0085370	CG34341	Pde11	0.00841324	0.050056	0.185	0.152	1
FBgn0033791	CG3915	Drl-2	0.00842677	0.0397913	0.197	0.171	1
FBgn0030897	CG5744	Frq1	0.00846377	0.565895	0.586	0.446	1
FBgn0261509	CG14351	haf	0.00860737	0.0555837	0.158	0.126	1
FBgn0040532	CG8369	CG8369	0.00895992	0.034004	0.16	0.138	1
FBgn0024321	CG8524	NK7.1	0.00912724	0.0174943	0.209	0.209	1
FBgn0004858	CG4220	elB	0.00968638	0.0216606	0.213	0.199	1
FBgn0263873	CG43720	sick	0.0103784	0.0306378	0.13	0.107	1
FBgn0051708	CG31708	DIP-zeta	0.010707	0.0552565	0.104	0.08	1
FBgn0261113	CG17836	Xrp1	0.0108092	0.0239091	0.239	0.226	1
FBgn0053517	CG33517	Dop2R	0.0109232	1.01454	0.85	0.824	1
FBgn0004885	CG6863	tok	0.0113786	0.00518823	0.132	0.131	1
FBgn0267033	CG45477	mamo	0.0117552	0.618422	0.365	0.242	1
FBgn0266377	CG45019	Pde8	0.012746	0.0347031	0.173	0.146	1
FBgn0032151	CG4128	nAChRalpha6	0.0131458	1.24866	0.86	0.799	1
FBgn0004449	CG5723	Ten-m	0.0136466	0.13887	0.403	0.341	1
FBgn0083975	CG34139	Nlg4	0.0138687	0.0502424	0.244	0.201	1
FBgn0037941	CG12594	CG12594	0.0143417	0.0919013	0.198	0.163	1
FBgn0000659	CG10002	fkh	0.0145469	0.0646501	0.103	0.083	1
FBgn0259108	CG34387	futsch	0.0148206	0.97301	0.934	0.905	1
FBgn0034725	CG6044	CG6044	0.0180288	-0.0657768	0.297	0.345	1
FBgn0261698	CG42732	SLO2	0.018638	0.0991079	0.31	0.252	1
FBgn0019643	CG3318	AANAT1	0.0189765	-0.0154913	0.132	0.148	1
FBgn0034978	CG3257	CG3257	0.0190417	-0.0254965	0.192	0.218	1
FBgn0028704	CG18660	Nckx30C	0.019433	0.266646	0.714	0.698	1
FBgn0259234	CG42332	Camta	0.0208142	0.0201931	0.221	0.215	1
FBgn0032666	CG5758	CG5758	0.0218206	0.134204	0.291	0.225	1
FBgn0010114	CG2040	hig	0.021913	0.243152	0.568	0.506	1
FBgn0035041	CG13594	CG13594	0.0219156	0.0332395	0.147	0.121	1
FBgn0034286	CG33996	dpr13	0.0220885	0.254105	0.409	0.329	1
FBgn0001229	CG4190	Hsp67Bc	0.0220914	-0.0540809	0.225	0.251	1
FBgn0036494	CG7250	Toll-6	0.0224049	0.27262	0.417	0.325	1
FBgn0014163	CG4609	fax	0.0230414	0.918712	0.776	0.647	1
FBgn0285944	CG9907	para	0.0231401	1.14987	0.884	0.81	1
FBgn0020907	CG14904	Scp2	0.0234801	-0.0216111	0.208	0.203	1
FBgn0032400	CG6770	CG6770	0.0241969	0.32907	0.675	0.622	1
FBgn0284243	CG9277	betaTub56D	0.0243944	0.0115193	0.324	0.314	1
FBgn0004580	CG6702	Cbp53E	0.0249509	0.996398	0.581	0.469	1
FBgn0001233	CG1242	Hsp83	0.0254839	-0.038255	0.617	0.635	1
FBgn0037153	CG12673	olf413	0.0255317	0.112903	0.379	0.327	1
FBgn0260658	CG42541	CG42541	0.025908	0.0227529	0.579	0.567	1
FBgn0261649	CG31247	tinc	0.0262645	0.0561857	0.171	0.14	1
FBgn0031736	CG11030	CG11030	0.0266177	0.101787	0.418	0.4	1
FBgn0032840	CG13968	sNPF	0.0273719	0.254046	0.186	0.162	1
FBgn0264606	CG43955	Fife	0.0292581	-0.0262337	0.574	0.602	1
FBgn0004244	CG10537	Rdl	0.029601	1.12872	0.964	0.965	1
FBgn0010300	CG10719	brat	0.0300983	0.266494	0.555	0.484	1
FBgn0000037	CG4356	mAChR-A	0.0307408	0.0647149	0.469	0.45	1
FBgn0031414	CG33955	eys	0.0319227	0.0741887	0.4	0.369	1
FBgn0085395	CG34366	Shawl	0.0321899	0.0248245	0.166	0.148	1
FBgn0037015	CG13253	cmpy	0.0323252	0.103527	0.292	0.233	1
FBgn0002023	CG10699	Lim3	0.033783	0.034427	0.107	0.091	1
FBgn0086680	CG10037	vvl	0.0343033	0.13568	0.182	0.148	1
FBgn0085413	CG34384	CG34384	0.0346567	0.124341	0.315	0.258	1
FBgn0039346	CG5079	CG5079	0.0369964	-0.0176778	0.148	0.165	1
FBgn0085407	CG34378	Pvf3	0.0385168	0.376614	0.515	0.427	1
FBgn0015609	CG7100	CadN	0.0392265	0.281801	0.61	0.559	1
FBgn0263220	CG43388	Hk	0.040018	0.545044	0.76	0.675	1
FBgn0010415	CG10497	Sdc	0.0403577	0.263905	0.683	0.627	1
FBgn0264087	CG43756	Slob	0.0407182	0.0271935	0.237	0.225	1
FBgn0030272	CG15201	CG15201	0.0433792	0.0517013	0.136	0.108	1
FBgn0262593	CG43128	Shab	0.0435492	0.260978	0.542	0.457	1
FBgn0013733	CG18076	shot	0.0438166	0.0674242	0.359	0.317	1
FBgn0004242	CG3139	Syt1	0.0443702	0.761917	0.881	0.858	1
FBgn0010473	CG15427	tutl	0.044403	0.397047	0.706	0.631	1
FBgn0025682	CG9148	scf	0.0457746	0.00340999	0.104	0.101	1
FBgn0052677	CG32677	X11Lbeta	0.0469004	0.19221	0.441	0.358	1
FBgn0261988	CG17998	Gprk2	0.0469358	0.227382	0.457	0.355	1
FBgn0010113	CG15532	hdc	0.0471607	0.82282	0.78	0.706	1
FBgn0086778	CG32538	nAChRalpha7	0.0476435	0.32506	0.552	0.456	1
FBgn0040726	CG13439	dpr1	0.0489969	0.142508	0.322	0.262	1
FBgn0085409	CG34380	smal	0.050813	0.0938546	0.332	0.285	1
FBgn0013686	CR34094	mt:lrRNA	0.0511305	3.66299	0.898	0.759	1
FBgn0028644	CG4838	beat-Ic	0.051477	0.349583	0.405	0.313	1
FBgn0000028	CG9151	acj6	0.0544258	0.245968	0.223	0.192	1
FBgn0250910	CG42244	Octbeta3R	0.0565539	0.0383441	0.184	0.159	1
FBgn0085383	CG34354	CG34354	0.0567268	0.156127	0.434	0.379	1
FBgn0035756	CG32381	unc-13-4A	0.0579838	0.155958	0.411	0.367	1
FBgn0265182	CG44247	CG44247	0.0584961	0.0453293	0.276	0.241	1
FBgn0085380	CG34351	CG34351	0.0586576	0.0256263	0.101	0.085	1
FBgn0019650	CG11186	toy	0.0590447	0.0502783	0.239	0.213	1
FBgn0267579	CR45919	lncRNA:CR45919	0.0608332	0.02077	0.145	0.129	1
FBgn0261999	CG42817	Ca-Ma2d	0.0619716	0.0627045	0.245	0.202	1
FBgn0261549	CG42667	rdgA	0.0620966	0.23586	0.484	0.433	1
FBgn0011676	CG6713	Nos	0.0630139	0.0416029	0.127	0.11	1
FBgn0031697	CG14024	CG14024	0.063338	-0.00431079	0.264	0.27	1
FBgn0025885	CG11143	Inos	0.0633736	-0.00507435	0.092	0.101	1
FBgn0036144	CG6207	GlcAT-P	0.0669038	0.0729818	0.257	0.215	1
FBgn0001224	CG4463	Hsp23	0.0673769	-0.0370805	0.149	0.147	1
FBgn0001078	CG4059	ftz-f1	0.0673773	0.109647	0.32	0.252	1
FBgn0039209	CG13624	REPTOR	0.0674421	0.0894309	0.275	0.23	1
FBgn0052506	CG32506	CG32506	0.0686123	0.0735873	0.294	0.256	1
FBgn0285963	CG46339	CG46339	0.0700353	0.0353528	0.154	0.128	1
FBgn0000108	CG7727	Appl	0.0708956	1.00778	0.893	0.856	1
FBgn0025360	CG18455	Optix	0.07092	0.00627255	0.128	0.128	1
FBgn0031374	CG7337	Wdr62	0.0734072	0.168795	0.468	0.402	1
FBgn0031770	CG13995	CG13995	0.0751437	0.0332182	0.297	0.277	1
FBgn0260943	CG32169	Rbp6	0.0778578	1.38861	0.865	0.84	1
FBgn0085434	CG34405	NaCP60E	0.0781928	0.543669	0.716	0.613	1
FBgn0039064	CG4467	CG4467	0.0799698	0.407308	0.647	0.551	1
FBgn0002643	CG8118	mam	0.0822506	0.0758072	0.221	0.173	1
FBgn0263392	CG43444	Tet	0.0827542	0.170922	0.543	0.507	1
FBgn0013954	CG11001	Fkbp12	0.0827768	-0.0722338	0.462	0.493	1
FBgn0026160	CG7958	tna	0.0844842	0.229168	0.428	0.349	1
FBgn0262737	CG7437	mub	0.0852247	0.821959	0.787	0.696	1
FBgn0029123	CG18024	SoxN	0.089628	0.153161	0.209	0.15	1
FBgn0038282	CG33485	dpr9	0.0899661	0.259343	0.572	0.534	1
FBgn0083991	CG34155	CG34155	0.0902993	-0.0163347	0.107	0.124	1
FBgn0263397	CG8585	Ih	0.0913168	0.812286	0.822	0.767	1
FBgn0001091	CG12055	Gapdh1	0.0915299	-0.0297876	0.253	0.273	1
FBgn0050419	CG30419	CG30419	0.0917445	0.0300279	0.192	0.173	1
FBgn0000024	CG17907	Ace	0.0919015	0.494379	0.694	0.626	1
FBgn0031897	CG13784	CG13784	0.0935378	0.0142441	0.288	0.282	1
FBgn0260793	CG42573	2mit	0.0951462	0.053232	0.246	0.206	1
FBgn0037525	CG17816	CG17816	0.103875	0.245398	0.541	0.456	1
FBgn0267252	CG3694	Ggamma30A	0.107207	0.770047	0.942	0.933	1
FBgn0038494	CG4135	beat-IIb	0.107696	0.0147101	0.121	0.11	1
FBgn0003423	CG1417	slgA	0.110423	0.147951	0.386	0.32	1
FBgn0038498	CG14334	beat-IIa	0.110759	0.179648	0.345	0.277	1
FBgn0259111	CG42253	Ndae1	0.112572	0.0453246	0.183	0.146	1
FBgn0002868	CG9470	MtnA	0.112776	0.272903	0.305	0.184	1
FBgn0039089	CG10152	beat-IV	0.113258	-0.00381106	0.224	0.227	1
FBgn0085432	CG34403	pan	0.11369	0.597533	0.786	0.701	1
FBgn0030505	CG11172	NFAT	0.119723	0.171274	0.447	0.381	1
FBgn0037956	CG6959	CG6959	0.120578	0.021385	0.111	0.093	1
FBgn0085447	CG34418	sif	0.122886	0.857877	0.657	0.45	1
FBgn0261871	CG33507	dpr2	0.123147	0.0235421	0.138	0.118	1
FBgn0266100	CG44837	CG44837	0.123182	0.0491286	0.17	0.142	1
FBgn0053202	CG33202	dpr11	0.123405	0.0731643	0.317	0.289	1
FBgn0000535	CG10952	eag	0.129198	0.126469	0.367	0.314	1
FBgn0028370	CG4192	kek3	0.13022	0.047255	0.156	0.129	1
FBgn0050089	CG30089	CG30089	0.132048	-0.0196372	0.114	0.134	1
FBgn0261244	CG33174	inaE	0.133538	0.158827	0.389	0.314	1
FBgn0266851	CR45312	lncRNA:CR45312	0.134147	-0.0349105	0.192	0.21	1
FBgn0038063	CG33976	Octbeta2R	0.134561	0.151837	0.379	0.33	1
FBgn0030412	CG17762	Tomosyn	0.136082	0.384235	0.664	0.579	1
FBgn0039349	CG4685	Ssadh	0.136536	-0.0141737	0.122	0.135	1
FBgn0038826	CG17838	Syp	0.138524	0.235058	0.531	0.466	1
FBgn0260660	CG42543	Mp	0.13957	0.0996114	0.4	0.361	1
FBgn0027339	CG11352	jim	0.140974	2.22958	0.984	0.989	1
FBgn0267336	CG34360	Glut4EF	0.143538	0.809025	0.829	0.777	1
FBgn0261556	CG42674	CG42674	0.143654	0.00333924	0.221	0.215	1
FBgn0003165	CG9755	pum	0.145082	0.735597	0.849	0.792	1
FBgn0267668	CR46006	lncRNA:CR46006	0.146758	0.0464007	0.124	0.096	1
FBgn0041707	CG1168	7B2	0.146829	-0.0348935	0.798	0.81	1
FBgn0036454	CG17839	CG17839	0.148266	0.0339273	0.161	0.138	1
FBgn0085419	CG34390	Rgk2	0.148481	0.0447317	0.177	0.146	1
FBgn0262018	CG42829	CadN2	0.148699	0.0456301	0.172	0.15	1
FBgn0010452	CG11280	trn	0.15013	0.0603919	0.181	0.157	1
FBgn0264000	CG43743	GluRIB	0.152815	0.221679	0.386	0.315	1
FBgn0034408	CG12758	sano	0.15657	0.0274193	0.115	0.097	1
FBgn0031971	CG7224	Sirup	0.15795	0.0125071	0.129	0.12	1
FBgn0014184	CG16747	Oda	0.159299	0.277344	0.682	0.65	1
FBgn0261788	CG42734	Ank2	0.163917	0.75485	0.843	0.768	1
FBgn0032048	CG13094	Dh31	0.164439	0.0595058	0.153	0.137	1
FBgn0015229	CG6575	glec	0.167053	0.244564	0.333	0.222	1
FBgn0266756	CG44012	btsz	0.168828	0.0468194	0.179	0.152	1
FBgn0052432	CG32432	CG32432	0.170164	0.0152163	0.217	0.201	1
FBgn0263994	CG43737	CG43737	0.173185	0.311719	0.567	0.48	1
FBgn0286778	CG46385	CG46385	0.173373	0.125092	0.42	0.381	1
FBgn0052406	CG32406	PVRAP	0.174082	0.0235165	0.127	0.11	1
FBgn0011661	CG10701	Moe	0.175353	-0.00124573	0.231	0.241	1
FBgn0264339	CG43795	CG43795	0.177868	-0.0264119	0.216	0.231	1
FBgn0261089	CG5559	Sytalpha	0.180492	0.0370396	0.182	0.154	1
FBgn0004509	CG10772	Fur1	0.185464	0.0651307	0.229	0.191	1
FBgn0000042	CG4027	Act5C	0.185742	0.176746	0.768	0.761	1
FBgn0263995	CG43738	cpo	0.186734	0.433034	0.8	0.782	1
FBgn0284245	CG8280	eEF1alpha1	0.190322	0.0589517	0.257	0.229	1
FBgn0035816	CG13685	CG13685	0.191183	0.0470278	0.206	0.175	1
FBgn0005775	CG7503	Con	0.193992	0.812618	0.64	0.52	1
FBgn0013973	CG1470	Gycbeta100B	0.194133	0.0356232	0.206	0.179	1
FBgn0039420	CG6154	CG6154	0.195006	0.0691709	0.2	0.165	1
FBgn0029663	CG10804	CG10804	0.195246	0.12151	0.22	0.146	1
FBgn0262782	CG5362	Mdh1	0.196674	-0.0100824	0.104	0.114	1
FBgn0028481	CG4341	CG4341	0.199809	0.0233548	0.216	0.204	1
FBgn0004880	CG1130	scrt	0.20238	0.399088	0.844	0.861	1
FBgn0004611	CG4574	Plc21C	0.213523	0.086786	0.525	0.512	1
FBgn0004369	CG11516	Ptp99A	0.213826	0.503701	0.739	0.658	1
FBgn0038321	CG6218	CG6218	0.223011	0.00101672	0.103	0.097	1
FBgn0263257	CG43395	Cngl	0.223235	0.802313	0.708	0.636	1
FBgn0260462	CG12163	CG12163	0.228474	0.0193922	0.155	0.139	1
FBgn0000036	CG5610	nAChRalpha1	0.228902	0.193572	0.485	0.423	1
FBgn0038839	CG10830	Ktl	0.230063	0.0108236	0.358	0.36	1
FBgn0262636	CG2052	dati	0.230974	0.306524	0.638	0.603	1
FBgn0038084	CG14390	beat-Vc	0.231202	0.0151475	0.119	0.108	1
FBgn0037913	CG6783	fabp	0.232684	-0.0184445	0.145	0.154	1
FBgn0265598	CG44425	Bx	0.234353	0.0776587	0.184	0.153	1
FBgn0265487	CG33197	mbl	0.235498	0.450645	0.579	0.525	1
FBgn0085412	CG34383	kmr	0.240995	0.100583	0.297	0.24	1
FBgn0034731	CG10384	CG10384	0.245509	0.0412509	0.249	0.222	1
FBgn0041094	CG7590	scyl	0.247814	0.209476	0.455	0.384	1
FBgn0001225	CG4183	Hsp26	0.252547	-0.0631872	0.162	0.178	1
FBgn0051361	CG31361	dpr17	0.256213	0.0411361	0.18	0.163	1
FBgn0038156	CG14372	side-IV	0.25808	0.0308775	0.128	0.108	1
FBgn0086677	CG30040	jeb	0.258457	0.672195	0.751	0.709	1
FBgn0039584	CG14064	beat-VI	0.258604	0.0654778	0.279	0.247	1
FBgn0038237	CG8279	Pde6	0.258765	0.314712	0.592	0.518	1
FBgn0003360	CG16944	sesB	0.260337	0.226252	0.769	0.768	1
FBgn0033358	CG8216	spab	0.261196	0.00648289	0.384	0.384	1
FBgn0259243	CG42341	Pka-R1	0.268003	0.103894	0.39	0.341	1
FBgn0034636	CG10440	twz	0.268713	-0.00290131	0.132	0.133	1
FBgn0052600	CG32600	dpr8	0.269556	0.206003	0.458	0.388	1
FBgn0028645	CG7644	beat-Ib	0.271718	0.0748857	0.327	0.296	1
FBgn0083949	CG34113	side-III	0.27359	0.256795	0.506	0.435	1
FBgn0001235	CG17117	hth	0.277143	0.326484	0.532	0.449	1
FBgn0010411	CG8900	RpS18	0.282075	-0.246653	0.749	0.841	1
FBgn0022382	CG15862	Pka-R2	0.282298	0.186183	0.425	0.345	1
FBgn0052264	CG32264	CG32264	0.285358	0.587283	0.735	0.665	1
FBgn0037676	CG8861	CG8861	0.292695	0.0132368	0.277	0.28	1
FBgn0024841	CG1963	Pcd	0.293729	0.0299763	0.253	0.23	1
FBgn0264895	CG44086	RapGAP1	0.295366	0.261774	0.481	0.422	1
FBgn0259213	CG42313	side-II	0.29945	0.0459498	0.389	0.377	1
FBgn0031835	CG11319	CG11319	0.300323	0.171487	0.445	0.408	1
FBgn0285948	CG15442	RpL27A	0.303064	-0.00372699	0.633	0.682	1
FBgn0030090	CG12664	fend	0.303839	0.146996	0.511	0.486	1
FBgn0040823	CG14162	dpr6	0.30452	0.0403174	0.288	0.276	1
FBgn0004514	CG7485	Oct-TyrR	0.304842	-0.00689902	0.145	0.146	1
FBgn0267253	CG32700	CG32700	0.331701	0.189132	0.391	0.341	1
FBgn0264815	CG44007	Pde1c	0.339941	0.1312	0.393	0.338	1
FBgn0085400	CG34371	side-V	0.340869	0.0427735	0.225	0.203	1
FBgn0038087	CG10134	beat-Va	0.343155	0.00717148	0.159	0.152	1
FBgn0085391	CG34362	trv	0.343531	1.01898	0.763	0.7	1
FBgn0266871	CR45332	lncRNA:CR45332	0.344244	-0.0150977	0.12	0.132	1
FBgn0052062	CG32062	Rbfox1	0.346438	0.963212	0.846	0.799	1
FBgn0083950	CG34114	side-VI	0.354026	0.299055	0.479	0.385	1
FBgn0039816	CG11317	CG11317	0.36107	0.000161559	0.184	0.186	1
FBgn0000116	CG32031	Argk	0.369166	0.144007	0.618	0.593	1
FBgn0013576	CG32464	mtd	0.371735	0.546432	0.783	0.716	1
FBgn0250908	CG42242	beat-VII	0.373253	0.156538	0.446	0.419	1
FBgn0011828	CG12002	Pxn	0.375485	-0.020283	0.093	0.105	1
FBgn0010313	CG2530	corto	0.376198	0.0983368	0.38	0.345	1
FBgn0028875	CG32975	nAChRalpha5	0.383474	0.627439	0.847	0.81	1
FBgn0003091	CG6622	Pkc53E	0.386664	0.570635	0.617	0.545	1
FBgn0023179	CG6438	amon	0.391966	0.19298	0.451	0.372	1
FBgn0264503	CG43902	CG43902	0.403992	0.125491	0.306	0.272	1
FBgn0243512	CG7850	puc	0.40537	0.0125895	0.124	0.119	1
FBgn0259242	CG42340	CG42340	0.409788	0.0307738	0.266	0.264	1
FBgn0261552	CG42670	ps	0.416362	0.517255	0.922	0.937	1
FBgn0086758	CG31666	chinmo	0.417812	0.437647	0.787	0.761	1
FBgn0000575	CG1007	emc	0.42476	0.0727872	0.347	0.31	1
FBgn0030574	CG9413	sbm	0.426285	0.0336859	0.154	0.13	1
FBgn0263353	CG11000	CG11000	0.43351	0.153581	0.545	0.504	1
FBgn0266418	CG45058	wake	0.437048	0.0170171	0.156	0.15	1
FBgn0035499	CG14996	Chd64	0.438409	0.0179394	0.151	0.136	1
FBgn0262509	CG43079	nrm	0.438432	0.0760789	0.317	0.282	1
FBgn0259171	CG42276	Pde9	0.438808	0.188695	0.612	0.596	1
FBgn0039647	CG14509	jus	0.439141	0.164528	0.449	0.41	1
FBgn0053543	CG33543	CG33543	0.441093	0.173456	0.388	0.342	1
FBgn0028496	CG30116	CG30116	0.443421	0.0940282	0.441	0.429	1
FBgn0000635	CG3665	Fas2	0.451155	0.21394	0.319	0.253	1
FBgn0027608	CG2082	CG2082	0.453174	0.0865903	0.342	0.308	1
FBgn0010412	CG4464	RpS19a	0.464217	0.0368627	0.335	0.328	1
FBgn0264006	CG43749	dysc	0.472316	0.436705	0.813	0.788	1
FBgn0085421	CG34392	Epac	0.477094	0.0733268	0.325	0.299	1
FBgn0027598	CG31012	cindr	0.48641	0.307221	0.483	0.384	1
FBgn0264490	CG18389	Eip93F	0.487678	0.276517	0.314	0.252	1
FBgn0263219	CG42330	Dscam4	0.493431	0.061149	0.236	0.205	1
FBgn0015399	CG12283	kek1	0.49384	0.168051	0.468	0.436	1
FBgn0023534	CG17778	CG17778	0.49944	0.0245957	0.185	0.168	1
FBgn0263980	CG43729	Stacl	0.507389	0.109574	0.681	0.655	1
FBgn0038653	CG18208	Octalpha2R	0.512208	0.0461435	0.351	0.345	1
FBgn0265296	CG42256	Dscam2	0.518933	0.461245	0.832	0.819	1
FBgn0029897	CG3203	RpL17	0.527877	-0.0361971	0.552	0.59	1
FBgn0011224	CG31000	heph	0.536292	1.77664	0.785	0.735	1
FBgn0033405	CG13954	CG13954	0.536577	0.12911	0.322	0.272	1
FBgn0038980	CG6919	Octbeta1R	0.543651	0.0302642	0.159	0.137	1
FBgn0039380	CG5890	CG5890	0.557631	0.0524705	0.282	0.256	1
FBgn0033250	CG14762	CG14762	0.557964	0.135799	0.677	0.674	1
FBgn0033192	CG2105	Corin	0.560473	0.0964494	0.287	0.24	1
FBgn0003429	CG10693	slo	0.572518	0.4795	0.751	0.688	1
FBgn0037874	CG4800	Tctp	0.576751	-0.0156847	0.308	0.323	1
FBgn0039617	CG14521	DIP-gamma	0.578657	-0.00145591	0.195	0.192	1
FBgn0043364	CG4427	cbt	0.580309	0.0245081	0.141	0.127	1
FBgn0005636	CG3385	nvy	0.597424	0.0051167	0.157	0.152	1
FBgn0033438	CG1794	Mmp2	0.608727	0.00511184	0.275	0.259	1
FBgn0266801	CG45263	CG45263	0.622222	0.0729309	0.505	0.491	1
FBgn0036935	CG14186	CG14186	0.627353	0.00931942	0.17	0.159	1
FBgn0024963	CG7535	GluClalpha	0.629803	0.476314	0.738	0.681	1
FBgn0263289	CG43398	scrib	0.641961	0.0138186	0.19	0.186	1
FBgn0264574	CG43946	Glut1	0.643619	0.0911258	0.398	0.364	1
FBgn0001085	CG17697	fz	0.646212	0.0570893	0.199	0.169	1
FBgn0261597	CG10305	RpS26	0.647352	-0.068142	0.72	0.778	1
FBgn0036927	CG7433	Gabat	0.658383	0.00325	0.226	0.226	1
FBgn0285952	CG3186	eEF5	0.662107	0.0250286	0.287	0.281	1
FBgn0013467	CG18285	igl	0.668445	0.277297	0.585	0.521	1
FBgn0035171	CG12502	CG12502	0.671446	0.00970387	0.159	0.148	1
FBgn0053147	CG33147	Hs3st-A	0.672538	0.33317	0.699	0.666	1
FBgn0031632	CG15628	CG15628	0.673577	0.0590004	0.501	0.491	1
FBgn0017590	CG6669	klg	0.679404	0.0736306	0.55	0.548	1
FBgn0261258	CG6014	rgn	0.695838	0.0417003	0.298	0.28	1
FBgn0053179	CG33179	beat-IIIb	0.69666	0.015517	0.337	0.337	1
FBgn0013433	CG4846	beat-Ia	0.701035	0.000623961	0.219	0.215	1
FBgn0000633	CG17716	CG17716	0.707317	0.341569	0.483	0.404	1
FBgn0011656	CG1429	Mef2	0.724556	0.0925852	0.292	0.245	1
FBgn0261555	CG42673	CG42673	0.725904	-0.00376808	0.111	0.116	1
FBgn0011582	CG9652	Dop1R1	0.729171	0.039457	0.278	0.275	1
FBgn0029814	CG15765	CG15765	0.729852	0.237602	0.518	0.476	1
FBgn0051774	CG31774	fred	0.750152	0.0463391	0.263	0.252	1
FBgn0010263	CG3151	Rbp9	0.751652	0.283346	0.616	0.569	1
FBgn0053143	CG33143	CG33143	0.756592	0.00435377	0.36	0.35	1
FBgn0000064	CG6058	Ald1	0.778657	0.0476386	0.534	0.529	1
FBgn0263930	CG4974	dally	0.787139	0.0996991	0.268	0.218	1
FBgn0033108	CG15236	CG15236	0.798338	0.107715	0.365	0.341	1
FBgn0044328	CG32052	CG32052	0.803647	0.0181521	0.296	0.287	1
FBgn0026428	CG6170	HDAC6	0.811896	0.012017	0.101	0.091	1
FBgn0083963	CG34127	Nlg3	0.812573	0.086274	0.586	0.569	1
FBgn0264908	CG44099	pHCl-1	0.816387	0.0754548	0.32	0.29	1
FBgn0001226	CG4466	Hsp27	0.81726	-0.0374026	0.147	0.148	1
FBgn0016061	CG31062	side	0.822446	0.160393	0.492	0.456	1
FBgn0036851	CG14082	CG14082	0.824868	-0.00296672	0.119	0.122	1
FBgn0262869	CG43224	Gfrl	0.830021	0.176793	0.468	0.424	1
FBgn0052017	CG32017	CG32017	0.842139	0.144341	0.389	0.327	1
FBgn0050158	CG30158	CG30158	0.855302	0.00196976	0.123	0.124	1
FBgn0033484	CG2269	CG2269	0.857034	0.553903	0.798	0.776	1
FBgn0259821	CG42402	CG42402	0.858778	0.170684	0.443	0.406	1
FBgn0051221	CG31221	CG31221	0.861667	5.52272	0.961	0.929	1
FBgn0000097	CG3166	aop	0.870458	0.0386952	0.213	0.197	1
FBgn0032901	CG9339	sky	0.876405	0.0682524	0.41	0.392	1
FBgn0036043	CG8177	CG8177	0.881477	0.0741021	0.408	0.379	1
FBgn0037521	CG2993	CG2993	0.88287	0.0718185	0.423	0.396	1
FBgn0000303	CG12345	ChAT	0.888171	0.0924489	0.531	0.511	1
FBgn0261836	CG42768	Msp300	0.893026	0.855624	0.843	0.801	1
FBgn0039054	CG13830	Cow	0.902652	0.162752	0.506	0.456	1
FBgn0033544	CG7220	CG7220	0.923057	0.00632588	0.208	0.202	1
FBgn0261804	CG42750	CG42750	0.923667	0.107056	0.458	0.429	1
FBgn0000273	CG4379	Pka-C1	0.9506	0.294153	0.6	0.532	1
FBgn0051665	CG31665	wry	0.952752	0.271031	0.463	0.38	1
FBgn0002593	CG4087	RpLP1	0.958106	-0.0183331	0.622	0.665	1
FBgn0027589	CG1688	CG1688	0.958987	0.0344595	0.176	0.16	1
FBgn0265002	CG44153	CG44153	0.966242	0.0135581	0.242	0.241	1
FBgn0036165	CG7533	chrb	0.968338	0.428816	0.704	0.639	1
FBgn0035032	CG4692	ATPsynF	0.968809	0.00137199	0.654	0.677	1
FBgn0036844	CG14080	Mkp3	0.969053	0.232384	0.504	0.44	1
FBgn0030723	CG14948	dpr18	0.971665	0.00866284	0.137	0.133	1
FBgn0032833	CG10664	COX4	0.97248	-0.123001	0.654	0.704	1
FBgn0005771	CG4491	noc	0.994585	0.00551025	0.133	0.132	1
FBgn0085414	CG34385	dpr12	0.99484	0.0766483	0.46	0.43	1
FBgn0270928	CG32848	VAChT	0.997277	0.156948	0.705	0.69	1
FBgn0035170	CG12191	dpr20	0.999163	0.00372463	0.106	0.106	1

## Sheet: Global_C6
FlyBaseID	GeneID	Gene symbol	p_val	avg_diff	pct.1	pct.2	p_val_adj
FBgn0019660	CR32665	lncRNA:roX2	0	-3.24141	0.01	0.896	0
FBgn0002940	CG4550	ninaE	7.61756e-41	-0.20868	0.101	0.228	1.14263e-37
FBgn0004619	CG8442	GluRIA	2.52613e-38	0.243299	0.299	0.171	3.7892e-35
FBgn0051690	CG31690	CG31690	1.73887e-36	0.220828	0.28	0.156	2.6083e-33
FBgn0058469	CR40469	lncRNA:CR40469	6.42551e-36	0.104555	0.138	0.063	9.63827e-33
FBgn0052057	CG32057	dpr10	5.24496e-33	0.193709	0.267	0.155	7.86744e-30
FBgn0087002	CG11064	apolpp	6.75781e-31	0.0705359	0.116	0.055	1.01367e-27
FBgn0013995	CG5685	Calx	1.54982e-30	0.244193	0.277	0.146	2.32473e-27
FBgn0011693	CG4899	Pdh	2.27655e-30	-0.167358	0.033	0.111	3.41482e-27
FBgn0033987	CG12424	ckn	7.49517e-28	0.164121	0.235	0.129	1.12428e-24
FBgn0052683	CG32683	CG32683	2.2063e-27	0.153482	0.217	0.119	3.30945e-24
FBgn0260971	CG42594	CG42594	2.62891e-27	0.257379	0.277	0.152	3.94336e-24
FBgn0052982	CG32982	CG32982	9.01898e-27	0.151849	0.202	0.114	1.35285e-23
FBgn0265595	CG44422	CG44422	1.24657e-25	0.305143	0.359	0.21	1.86985e-22
FBgn0260429	CG42524	CG42524	2.59201e-25	0.0852647	0.154	0.092	3.88802e-22
FBgn0015766	CG10596	Msr-110	1.09539e-24	0.0706637	0.109	0.048	1.64308e-21
FBgn0004652	CG14307	fru	1.2189e-23	0.59868	0.379	0.202	1.82835e-20
FBgn0003301	CG9533	rut	2.16967e-23	0.122514	0.227	0.144	3.2545e-20
FBgn0035050	CG4871	SiaT	1.12516e-21	0.117967	0.135	0.059	1.68774e-18
FBgn0267322	CR45758	lncRNA:CR45758	5.74315e-21	0.107715	0.222	0.146	8.61473e-18
FBgn0004395	CG4620	unk	7.03593e-21	0.11589	0.223	0.144	1.05539e-17
FBgn0264753	CG44011	Rgk1	1.05444e-20	0.106804	0.143	0.072	1.58165e-17
FBgn0283499	CG18402	InR	1.20438e-20	0.108661	0.229	0.149	1.80657e-17
FBgn0031299	CG4629	CG4629	1.37058e-20	0.0629054	0.165	0.112	2.05588e-17
FBgn0087012	CG1056	5-HT2A	1.57938e-20	0.113825	0.127	0.056	2.36907e-17
FBgn0283651	CG46301	CG46301	2.54566e-20	0.113746	0.148	0.074	3.81849e-17
FBgn0250867	CG42238	CG42238	5.80661e-20	0.106432	0.225	0.159	8.70992e-17
FBgn0019662	CG8593	qm	8.47082e-20	0.0619489	0.164	0.115	1.27062e-16
FBgn0036789	CG13702	AstC-R2	1.74298e-19	0.145373	0.185	0.112	2.61447e-16
FBgn0264090	CG43759	CG43759	4.5348e-19	0.126085	0.203	0.131	6.80221e-16
FBgn0052626	CG32626	AMPdeam	1.17549e-18	0.0662948	0.164	0.112	1.76324e-15
FBgn0002945	CG11614	nkd	2.59284e-18	0.253292	0.333	0.219	3.88926e-15
FBgn0083228	CG5907	Frq2	4.7413e-18	0.381324	0.432	0.302	7.11196e-15
FBgn0261260	CG42611	mgl	4.93197e-18	0.0783742	0.126	0.069	7.39796e-15
FBgn0052066	CG32066	CG32066	9.48992e-18	0.0834391	0.154	0.092	1.42349e-14
FBgn0013718	CG33991	nuf	2.93776e-17	0.0553744	0.11	0.063	4.40664e-14
FBgn0051163	CG31163	SKIP	3.87336e-17	0.259511	0.339	0.22	5.81005e-14
FBgn0262473	CG5490	Tl	4.36515e-17	0.100377	0.159	0.089	6.54772e-14
FBgn0267910	CR34335	lncRNA:CR34335	6.53116e-17	10.2864	0.995	0.957	9.79674e-14
FBgn0030158	CG9686	CG9686	7.12426e-17	0.0729059	0.12	0.066	1.06864e-13
FBgn0262636	CG2052	dati	8.30723e-17	0.147147	0.144	0.071	1.24608e-13
FBgn0000121	CG5962	Arr2	9.48185e-17	-0.118129	0.1	0.175	1.42228e-13
FBgn0085426	CG34397	Rgk3	1.62056e-16	0.0823123	0.131	0.077	2.43083e-13
FBgn0086604	CG12484	side-VIII	1.74421e-16	0.118148	0.191	0.114	2.61632e-13
FBgn0038641	CG7708	ChT	2.64189e-16	0.0618167	0.166	0.112	3.96283e-13
FBgn0042696	CG2380	NfI	6.24627e-16	0.122962	0.251	0.172	9.3694e-13
FBgn0029768	CG16752	SPR	8.83176e-16	0.150436	0.179	0.104	1.32476e-12
FBgn0020621	CG2049	Pkn	1.22021e-15	0.0654978	0.107	0.053	1.83032e-12
FBgn0020269	CG10145	mspo	1.96979e-15	0.137319	0.248	0.169	2.95469e-12
FBgn0051324	CG31324	CG31324	5.59602e-15	0.270214	0.36	0.245	8.39403e-12
FBgn0285963	CG46339	CG46339	1.67842e-14	0.0415074	0.141	0.107	2.51763e-11
FBgn0050361	CG30361	mtt	2.02688e-14	0.077962	0.115	0.062	3.04032e-11
FBgn0053087	CG33087	LRP1	2.97972e-14	0.0630692	0.13	0.078	4.46957e-11
FBgn0039209	CG13624	REPTOR	3.28873e-14	0.124332	0.286	0.21	4.9331e-11
FBgn0260941	CG42318	app	3.52138e-14	0.104337	0.2	0.131	5.28207e-11
FBgn0032666	CG5758	CG5758	3.52575e-14	0.125751	0.237	0.166	5.28862e-11
FBgn0259677	CG42346	CG42346	7.0091e-14	0.0927445	0.165	0.107	1.05136e-10
FBgn0037153	CG12673	olf413	1.93135e-13	0.147005	0.299	0.218	2.89703e-10
FBgn0033403	CG13739	CG13739	2.36379e-13	0.224896	0.283	0.176	3.54569e-10
FBgn0031738	CG9171	CG9171	2.45561e-13	0.0635799	0.135	0.089	3.68342e-10
FBgn0015777	CG9261	nrv2	2.48268e-13	0.041619	0.171	0.135	3.72402e-10
FBgn0050463	CG30463	Pgant9	2.51398e-13	0.151248	0.296	0.215	3.77097e-10
FBgn0003499	CG7847	sr	2.66145e-13	0.1196	0.157	0.09	3.99218e-10
FBgn0085753	CR40596	28SrRNA-Psi:CR40596	3.71511e-13	0.0619064	0.143	0.092	5.57267e-10
FBgn0032629	CG15138	beat-IIIc	3.91748e-13	0.284022	0.314	0.211	5.87623e-10
FBgn0000547	CG12676	ed	4.56613e-13	0.164089	0.266	0.196	6.8492e-10
FBgn0263706	CG43658	CG43658	7.95843e-13	-0.00521464	0.195	0.193	1.19377e-09
FBgn0259170	CG42275	alpha-Man-Ia	9.9665e-13	0.113038	0.239	0.168	1.49497e-09
FBgn0031306	CG4577	CG4577	1.1048e-12	0.144091	0.221	0.141	1.6572e-09
FBgn0036801	CG6896	MYPT-75D	1.61625e-12	0.137395	0.243	0.172	2.42437e-09
FBgn0285879	CG32577	disco-r	2.00743e-12	0.225793	0.203	0.126	3.01115e-09
FBgn0035495	CG14989	CG14989	2.81946e-12	0.716297	0.447	0.385	4.22918e-09
FBgn0285926	CG1691	Imp	2.98547e-12	0.167983	0.116	0.056	4.4782e-09
FBgn0261988	CG17998	Gprk2	3.20172e-12	0.254604	0.419	0.311	4.80258e-09
FBgn0052521	CG32521	CG32521	4.80306e-12	0.048974	0.12	0.088	7.20458e-09
FBgn0040765	CG33473	luna	4.99644e-12	0.240881	0.356	0.262	7.49466e-09
FBgn0085384	CG34355	CG34355	7.77735e-12	0.0989903	0.146	0.082	1.1666e-08
FBgn0028369	CG3653	kirre	7.78306e-12	0.217861	0.356	0.255	1.16746e-08
FBgn0004910	CG15855	Eip63F-1	1.81702e-11	0.0726752	0.12	0.065	2.72554e-08
FBgn0004168	CG16720	5-HT1A	2.35323e-11	0.113478	0.259	0.208	3.52984e-08
FBgn0038246	CG14853	CG14853	5.12379e-11	0.0411552	0.187	0.151	7.68569e-08
FBgn0013733	CG18076	shot	5.29438e-11	0.15584	0.325	0.228	7.94157e-08
FBgn0011818	CG9884	oaf	6.9361e-11	0.0800004	0.146	0.091	1.04042e-07
FBgn0051814	CG31814	DIP-kappa	1.18755e-10	0.162152	0.173	0.109	1.78132e-07
FBgn0260442	CG6831	rhea	1.70805e-10	0.0448051	0.121	0.08	2.56207e-07
FBgn0085399	CG34370	CG34370	4.49881e-10	0.0668679	0.201	0.159	6.74822e-07
FBgn0085420	CG34391	DIP-delta	5.24605e-10	0.0970368	0.129	0.08	7.86907e-07
FBgn0004607	CG1449	zfh2	5.62117e-10	0.0919314	0.133	0.086	8.43176e-07
FBgn0262160	CG9932	CG9932	8.61611e-10	0.229161	0.311	0.209	1.29242e-06
FBgn0029922	CG14431	CG14431	8.79781e-10	0.0387588	0.117	0.076	1.31967e-06
FBgn0010434	CG11949	cora	9.4065e-10	0.0244104	0.121	0.1	1.41097e-06
FBgn0031530	CG3254	Pgant2	1.31839e-09	0.0697784	0.141	0.1	1.97758e-06
FBgn0051760	CG31760	CG31760	1.49375e-09	0.0490432	0.144	0.105	2.24062e-06
FBgn0033159	CG17800	Dscam1	1.58612e-09	0.0657548	0.166	0.124	2.37919e-06
FBgn0260943	CG32169	Rbp6	2.49168e-09	1.87547	0.866	0.822	3.73752e-06
FBgn0261649	CG31247	tinc	2.76014e-09	0.045963	0.143	0.106	4.14021e-06
FBgn0040532	CG8369	CG8369	3.15365e-09	0.121053	0.203	0.143	4.73047e-06
FBgn0011224	CG31000	heph	4.22798e-09	1.06208	0.635	0.515	6.34197e-06
FBgn0033791	CG3915	Drl-2	4.22827e-09	0.0539608	0.104	0.059	6.3424e-06
FBgn0030913	CG6123	CG6123	4.30707e-09	0.0864222	0.216	0.169	6.46061e-06
FBgn0000659	CG10002	fkh	4.53727e-09	0.176502	0.155	0.098	6.8059e-06
FBgn0263773	CG43690	fok	4.97312e-09	0.125672	0.255	0.181	7.45969e-06
FBgn0002868	CG9470	MtnA	5.00116e-09	0.288008	0.324	0.195	7.50174e-06
FBgn0015229	CG6575	glec	5.85792e-09	0.391257	0.433	0.298	8.78688e-06
FBgn0086680	CG10037	vvl	6.37966e-09	0.188891	0.114	0.064	9.56949e-06
FBgn0035756	CG32381	unc-13-4A	1.34249e-08	0.159579	0.257	0.181	2.01374e-05
FBgn0264000	CG43743	GluRIB	1.36125e-08	0.354885	0.395	0.268	2.04187e-05
FBgn0261285	CG5629	Ppcs	1.36262e-08	0.0479609	0.172	0.141	2.04394e-05
FBgn0038542	CG7431	TyrR	1.61869e-08	0.0645725	0.103	0.061	2.42804e-05
FBgn0085397	CG34368	Fili	1.74882e-08	0.0813734	0.157	0.108	2.62323e-05
FBgn0053639	CG33639	CG33639	1.95087e-08	0.0385349	0.101	0.068	2.9263e-05
FBgn0086359	CG3953	Invadolysin	2.00572e-08	0.0414874	0.119	0.085	3.00858e-05
FBgn0261698	CG42732	SLO2	2.01906e-08	0.150452	0.32	0.241	3.02858e-05
FBgn0024321	CG8524	NK7.1	3.25602e-08	0.0626137	0.213	0.172	4.88404e-05
FBgn0002023	CG10699	Lim3	3.48983e-08	0.0743038	0.105	0.061	5.23475e-05
FBgn0019985	CG11144	mGluR	3.55678e-08	0.123817	0.241	0.173	5.33517e-05
FBgn0000028	CG9151	acj6	4.05671e-08	0.24062	0.165	0.107	6.08506e-05
FBgn0263219	CG42330	Dscam4	5.19779e-08	0.144588	0.272	0.197	7.79668e-05
FBgn0036725	CG18265	CG18265	6.00674e-08	0.0495476	0.107	0.073	9.01011e-05
FBgn0262614	CG43140	pyd	6.51948e-08	0.124935	0.201	0.144	9.77922e-05
FBgn0261046	CG31190	Dscam3	6.6774e-08	0.0681946	0.127	0.082	0.000100161
FBgn0030272	CG15201	CG15201	7.16889e-08	0.0849418	0.165	0.118	0.000107533
FBgn0030505	CG11172	NFAT	8.38474e-08	0.108299	0.298	0.228	0.000125771
FBgn0010300	CG10719	brat	8.73003e-08	0.192642	0.324	0.235	0.00013095
FBgn0015519	CG2302	nAChRalpha3	1.01641e-07	0.113104	0.294	0.238	0.000152461
FBgn0027356	CG8604	Amph	1.13788e-07	0.0477326	0.162	0.127	0.000170681
FBgn0052406	CG32406	PVRAP	1.22981e-07	0.0384901	0.107	0.072	0.000184471
FBgn0004198	CG11387	ct	1.40261e-07	1.29825	0.645	0.513	0.000210392
FBgn0033405	CG13954	CG13954	1.86351e-07	0.122255	0.289	0.228	0.000279526
FBgn0014859	CG1864	Hr38	2.02387e-07	-0.0905413	0.258	0.232	0.00030358
FBgn0052206	CG32206	CG32206	2.52367e-07	0.0953731	0.309	0.261	0.000378551
FBgn0264442	CG43860	ab	3.57413e-07	0.0776815	0.155	0.107	0.00053612
FBgn0052204	CG32204	CG32204	3.61025e-07	0.0469327	0.164	0.136	0.000541538
FBgn0029824	CG3726	CG3726	3.86969e-07	0.120587	0.248	0.2	0.000580453
FBgn0011661	CG10701	Moe	3.92613e-07	0.0121272	0.151	0.138	0.000588919
FBgn0036454	CG17839	CG17839	4.13407e-07	0.0746882	0.21	0.165	0.000620111
FBgn0066101	CG31094	LpR1	4.70591e-07	0.0637316	0.191	0.151	0.000705887
FBgn0264975	CG1634	Nrg	8.202e-07	0.0545783	0.186	0.153	0.0012303
FBgn0259213	CG42313	side-II	8.596e-07	-0.108617	0.399	0.416	0.0012894
FBgn0024189	CG33141	sns	9.35927e-07	0.0464425	0.138	0.099	0.00140389
FBgn0267579	CR45919	lncRNA:CR45919	1.0584e-06	0.0390837	0.117	0.082	0.00158761
FBgn0264308	CG43778	CG43778	1.15267e-06	0.0739599	0.229	0.187	0.00172901
FBgn0033368	CG13743	CG13743	1.18116e-06	0.0469264	0.136	0.102	0.00177173
FBgn0267033	CG45477	mamo	1.21803e-06	0.827415	0.602	0.54	0.00182705
FBgn0003360	CG16944	sesB	1.23694e-06	0.0823879	0.786	0.846	0.00185541
FBgn0261588	CG42698	pdm3	1.27652e-06	0.109156	0.163	0.112	0.00191478
FBgn0065099	CR33925	snRNA:7SK	1.34491e-06	1.90742	0.83	0.702	0.00201737
FBgn0051092	CG31092	LpR2	1.59018e-06	0.0350133	0.106	0.077	0.00238528
FBgn0029663	CG10804	CG10804	1.64099e-06	0.149848	0.232	0.147	0.00246148
FBgn0085385	CG34356	bma	1.73171e-06	0.0330681	0.166	0.15	0.00259756
FBgn0036144	CG6207	GlcAT-P	1.9641e-06	0.0395173	0.216	0.191	0.00294615
FBgn0033356	CG8229	CG8229	3.57262e-06	-0.0348021	0.107	0.132	0.00535893
FBgn0085412	CG34383	kmr	3.85789e-06	0.126333	0.293	0.229	0.00578683
FBgn0266100	CG44837	CG44837	3.98627e-06	0.0440925	0.144	0.107	0.0059794
FBgn0035816	CG13685	CG13685	4.77333e-06	0.0705778	0.182	0.136	0.00715999
FBgn0030574	CG9413	sbm	4.9367e-06	0.0384047	0.137	0.108	0.00740506
FBgn0026160	CG7958	tna	5.09853e-06	0.389067	0.486	0.354	0.0076478
FBgn0031424	CG9887	VGlut	5.63785e-06	0.387973	0.231	0.164	0.00845677
FBgn0015774	CG10521	NetB	6.3649e-06	0.111205	0.204	0.158	0.00954735
FBgn0265194	CG44240	Trpm	6.45026e-06	0.0539652	0.108	0.073	0.00967539
FBgn0052506	CG32506	CG32506	6.63178e-06	0.0512601	0.242	0.209	0.00994767
FBgn0000459	CG9908	disco	1.02291e-05	0.202109	0.213	0.16	0.0153437
FBgn0011656	CG1429	Mef2	1.1099e-05	0.104054	0.274	0.217	0.0166484
FBgn0261999	CG42817	Ca-Ma2d	1.15723e-05	0.0765412	0.176	0.127	0.0173584
FBgn0086778	CG32538	nAChRalpha7	1.22492e-05	0.408294	0.553	0.498	0.0183738
FBgn0004885	CG6863	tok	1.23286e-05	0.0302596	0.107	0.078	0.0184929
FBgn0083950	CG34114	side-VI	1.32974e-05	0.417119	0.486	0.357	0.0199461
FBgn0264815	CG44007	Pde1c	1.39072e-05	0.161144	0.325	0.245	0.0208608
FBgn0001085	CG17697	fz	1.61658e-05	0.0696189	0.183	0.146	0.0242487
FBgn0262018	CG42829	CadN2	1.74223e-05	0.0503919	0.143	0.105	0.0261334
FBgn0083975	CG34139	Nlg4	1.8187e-05	0.0594418	0.2	0.153	0.0272805
FBgn0039420	CG6154	CG6154	1.85284e-05	0.0664987	0.143	0.103	0.0277926
FBgn0085370	CG34341	Pde11	1.86184e-05	0.0425224	0.104	0.071	0.0279276
FBgn0270928	CG32848	VAChT	1.98344e-05	0.119896	0.614	0.632	0.0297515
FBgn0038498	CG14334	beat-IIa	2.00849e-05	0.249985	0.345	0.257	0.0301274
FBgn0032151	CG4128	nAChRalpha6	2.16318e-05	1.48264	0.772	0.646	0.0324477
FBgn0010452	CG11280	trn	2.22126e-05	0.123525	0.258	0.219	0.0333188
FBgn0052677	CG32677	X11Lbeta	2.53553e-05	0.126517	0.375	0.306	0.0380329
FBgn0005775	CG7503	Con	2.74148e-05	0.865857	0.561	0.419	0.0411222
FBgn0259108	CG34387	futsch	2.81517e-05	0.689706	0.873	0.857	0.0422276
FBgn0014163	CG4609	fax	2.841e-05	0.715585	0.61	0.428	0.042615
FBgn0027598	CG31012	cindr	3.31724e-05	0.491142	0.607	0.467	0.0497586
FBgn0052017	CG32017	CG32017	3.43697e-05	0.195942	0.417	0.347	0.0515546
FBgn0085413	CG34384	CG34384	3.64887e-05	0.122318	0.306	0.253	0.054733
FBgn0035041	CG13594	CG13594	3.68299e-05	0.0285637	0.12	0.098	0.0552449
FBgn0031770	CG13995	CG13995	3.87548e-05	0.0658085	0.178	0.132	0.0581322
FBgn0259234	CG42332	Camta	4.1332e-05	0.0468517	0.213	0.18	0.0619981
FBgn0283451	CG11491	br	4.59173e-05	0.186165	0.217	0.171	0.0688759
FBgn0031016	CG12199	kek5	4.64109e-05	0.0341329	0.103	0.079	0.0696164
FBgn0023095	CG11282	caps	4.65072e-05	0.029587	0.171	0.147	0.0697608
FBgn0003326	CG17579	sca	4.65582e-05	0.0376028	0.115	0.086	0.0698373
FBgn0259243	CG42341	Pka-R1	4.83901e-05	0.0975558	0.24	0.179	0.0725851
FBgn0024944	CG3856	Oamb	4.84774e-05	0.041978	0.106	0.075	0.0727161
FBgn0264574	CG43946	Glut1	5.58255e-05	0.147882	0.364	0.293	0.0837383
FBgn0004595	CG17228	pros	5.93169e-05	5.08374	0.959	0.922	0.0889754
FBgn0264273	CG33960	Sema2b	6.23751e-05	0.0752081	0.179	0.143	0.0935626
FBgn0038084	CG14390	beat-Vc	6.57012e-05	0.020582	0.11	0.091	0.0985518
FBgn0004516	CG14994	Gad1	6.61623e-05	0.0976846	0.106	0.052	0.0992435
FBgn0040397	CG3655	CG3655	8.11246e-05	0.0502124	0.153	0.124	0.121687
FBgn0028888	CG4168	CG4168	9.67245e-05	0.0342471	0.116	0.093	0.145087
FBgn0085409	CG34380	smal	0.000111224	0.0745355	0.249	0.213	0.166836
FBgn0263994	CG43737	CG43737	0.000114403	0.419992	0.541	0.412	0.171604
FBgn0000179	CG3578	bi	0.000117151	0.375465	0.369	0.301	0.175726
FBgn0032833	CG10664	COX4	0.000117925	-0.426186	0.73	0.835	0.176888
FBgn0013467	CG18285	igl	0.000118155	0.499497	0.567	0.441	0.177233
FBgn0040726	CG13439	dpr1	0.000118692	0.217883	0.374	0.305	0.178038
FBgn0267668	CR46006	lncRNA:CR46006	0.000134971	0.085933	0.292	0.256	0.202457
FBgn0028481	CG4341	CG4341	0.000141815	0.0750106	0.217	0.173	0.212722
FBgn0001233	CG1242	Hsp83	0.000148044	-0.0870363	0.518	0.557	0.222066
FBgn0031632	CG15628	CG15628	0.000160859	-3.80452e-05	0.522	0.544	0.241288
FBgn0263930	CG4974	dally	0.000179039	0.135598	0.275	0.21	0.268558
FBgn0250910	CG42244	Octbeta3R	0.000189179	0.0305411	0.195	0.175	0.283768
FBgn0037015	CG13253	cmpy	0.000196462	0.0652364	0.252	0.222	0.294693
FBgn0031971	CG7224	Sirup	0.000204215	0.0169955	0.104	0.092	0.306323
FBgn0053202	CG33202	dpr11	0.000230122	0.0565781	0.245	0.213	0.345183
FBgn0085447	CG34418	sif	0.000233295	1.16715	0.731	0.547	0.349943
FBgn0031897	CG13784	CG13784	0.000236345	0.0767797	0.305	0.256	0.354517
FBgn0085382	CG34353	CG34353	0.000246605	0.0847521	0.286	0.252	0.369907
FBgn0038494	CG4135	beat-IIb	0.000256998	0.05013	0.113	0.08	0.385497
FBgn0262738	CG3620	norpA	0.000257509	0.0457499	0.48	0.484	0.386264
FBgn0286778	CG46385	CG46385	0.000257643	0.18849	0.328	0.246	0.386464
FBgn0041097	CG5423	robo3	0.000268111	0.0363439	0.107	0.082	0.402166
FBgn0037521	CG2993	CG2993	0.000284954	0.0978523	0.363	0.315	0.427431
FBgn0259111	CG42253	Ndae1	0.000286239	0.0292065	0.132	0.108	0.429358
FBgn0031736	CG11030	CG11030	0.000286964	0.061765	0.169	0.135	0.430447
FBgn0050419	CG30419	CG30419	0.000297074	0.0339759	0.12	0.098	0.445611
FBgn0263289	CG43398	scrib	0.000310124	0.0502573	0.169	0.129	0.465186
FBgn0013688	CR34096	mt:srRNA	0.000311049	0.0428872	0.142	0.105	0.466573
FBgn0262593	CG43128	Shab	0.000322762	0.243402	0.465	0.372	0.484143
FBgn0051646	CG31646	DIP-theta	0.000331459	0.124679	0.229	0.188	0.497189
FBgn0036494	CG7250	Toll-6	0.000333024	0.254492	0.343	0.26	0.499537
FBgn0261509	CG14351	haf	0.000376189	0.0787361	0.188	0.156	0.564284
FBgn0016797	CG9739	fz2	0.000420492	0.105609	0.263	0.22	0.630738
FBgn0259789	CG12701	zld	0.00049696	0.0799282	0.175	0.136	0.745441
FBgn0038980	CG6919	Octbeta1R	0.000502391	0.0528561	0.122	0.088	0.753587
FBgn0036043	CG8177	CG8177	0.000523948	0.0774294	0.295	0.25	0.785922
FBgn0000636	CG5803	Fas3	0.000529146	0.072963	0.213	0.176	0.793719
FBgn0030174	CG15312	CG15312	0.000534689	0.0538545	0.215	0.181	0.802034
FBgn0265052	CG44167	St3	0.000543592	0.0617801	0.239	0.204	0.815388
FBgn0034731	CG10384	CG10384	0.000569285	0.0554178	0.243	0.204	0.853927
FBgn0023179	CG6438	amon	0.000591176	0.149187	0.312	0.244	0.886763
FBgn0285952	CG3186	eEF5	0.000591579	0.043473	0.263	0.231	0.887368
FBgn0029123	CG18024	SoxN	0.00059461	0.415417	0.425	0.361	0.891915
FBgn0002643	CG8118	mam	0.000608899	0.0747413	0.266	0.233	0.913349
FBgn0265182	CG44247	CG44247	0.000624688	0.0215853	0.143	0.125	0.937032
FBgn0027589	CG1688	CG1688	0.000632924	0.0667938	0.198	0.162	0.949386
FBgn0260003	CG34157	Dys	0.000703853	0.0365698	0.156	0.136	1
FBgn0261113	CG17836	Xrp1	0.000762103	0.0518005	0.183	0.153	1
FBgn0000037	CG4356	mAChR-A	0.000777763	0.134367	0.387	0.324	1
FBgn0260658	CG42541	CG42541	0.00079375	-0.264536	0.625	0.663	1
FBgn0004580	CG6702	Cbp53E	0.000804079	1.45514	0.691	0.546	1
FBgn0011666	CG5099	msi	0.00081248	0.773822	0.652	0.471	1
FBgn0011582	CG9652	Dop1R1	0.000868593	0.0485857	0.178	0.151	1
FBgn0004449	CG5723	Ten-m	0.000879662	0.0988762	0.334	0.293	1
FBgn0287186	CG17594	scro	0.00091642	0.0631409	0.313	0.277	1
FBgn0263257	CG43395	Cngl	0.0010015	1.07195	0.771	0.654	1
FBgn0033196	CG1358	CG1358	0.00111394	0.038891	0.106	0.08	1
FBgn0033446	CG1648	CG1648	0.00118861	0.017851	0.127	0.114	1
FBgn0052183	CG32183	Ccn	0.0012825	0.0302094	0.196	0.183	1
FBgn0032048	CG13094	Dh31	0.00135537	0.069994	0.115	0.101	1
FBgn0264606	CG43955	Fife	0.00141507	0.0497998	0.482	0.493	1
FBgn0000097	CG3166	aop	0.00141615	0.0727683	0.209	0.169	1
FBgn0028644	CG4838	beat-Ic	0.00152336	0.658229	0.488	0.378	1
FBgn0000635	CG3665	Fas2	0.00155182	0.202257	0.224	0.145	1
FBgn0001234	CR31400	lncRNA:Hsromega	0.00159945	2.90613	0.989	0.995	1
FBgn0039349	CG4685	Ssadh	0.00168366	-0.0419171	0.123	0.15	1
FBgn0031294	CG31795	IA-2	0.00171903	3.43322	0.975	0.968	1
FBgn0000633	CG17716	CG17716	0.00173467	0.423863	0.468	0.354	1
FBgn0033268	CG2297	Obp44a	0.00176645	0.234593	0.25	0.201	1
FBgn0038087	CG10134	beat-Va	0.00178783	0.0317668	0.156	0.135	1
FBgn0261871	CG33507	dpr2	0.00184909	0.0353421	0.159	0.134	1
FBgn0260793	CG42573	2mit	0.00236114	0.0674635	0.215	0.181	1
FBgn0010415	CG10497	Sdc	0.00236496	0.316744	0.631	0.556	1
FBgn0085395	CG34366	Shawl	0.00240779	0.0322594	0.176	0.159	1
FBgn0020907	CG14904	Scp2	0.00241889	0.0750896	0.143	0.108	1
FBgn0267001	CG42338	Ten-a	0.0024407	1.45334	0.861	0.732	1
FBgn0053517	CG33517	Dop2R	0.00247105	2.36913	0.959	0.947	1
FBgn0264503	CG43902	CG43902	0.00257774	0.195797	0.332	0.266	1
FBgn0010113	CG15532	hdc	0.00266802	0.691092	0.502	0.347	1
FBgn0027339	CG11352	jim	0.00271711	2.28062	0.972	0.976	1
FBgn0264908	CG44099	pHCl-1	0.00312196	0.121079	0.304	0.252	1
FBgn0023534	CG17778	CG17778	0.00325137	0.0396451	0.203	0.18	1
FBgn0028370	CG4192	kek3	0.00354123	0.0642716	0.186	0.152	1
FBgn0051665	CG31665	wry	0.00358204	0.29664	0.515	0.442	1
FBgn0260462	CG12163	CG12163	0.00361859	-0.00710227	0.11	0.111	1
FBgn0261928	CG42795	CG42795	0.00373863	0.0991659	0.285	0.236	1
FBgn0031374	CG7337	Wdr62	0.00416108	0.279749	0.493	0.407	1
FBgn0265597	CG44424	rad	0.00419146	0.225344	0.45	0.417	1
FBgn0085391	CG34362	trv	0.00421722	1.03383	0.721	0.652	1
FBgn0033438	CG1794	Mmp2	0.00441963	0.0616879	0.244	0.205	1
FBgn0262509	CG43079	nrm	0.00446054	0.0662333	0.245	0.219	1
FBgn0259216	CG42316	RhoGAP102A	0.00446551	-0.0263566	0.09	0.111	1
FBgn0041707	CG1168	7B2	0.00474062	-0.102537	0.655	0.704	1
FBgn0036935	CG14186	CG14186	0.00480165	0.0301001	0.153	0.129	1
FBgn0004858	CG4220	elB	0.00506176	0.0575288	0.169	0.136	1
FBgn0037874	CG4800	Tctp	0.00508438	-0.021377	0.35	0.37	1
FBgn0051619	CG31619	nolo	0.00531607	0.0758105	0.204	0.168	1
FBgn0033358	CG8216	spab	0.00566616	0.0155322	0.133	0.114	1
FBgn0032840	CG13968	sNPF	0.00603959	0.127689	0.13	0.096	1
FBgn0001078	CG4059	ftz-f1	0.00634014	0.179064	0.445	0.378	1
FBgn0041605	CG32490	cpx	0.00640176	0.748293	0.984	0.983	1
FBgn0030723	CG14948	dpr18	0.00692132	0.0284247	0.134	0.112	1
FBgn0033108	CG15236	CG15236	0.0070923	0.058117	0.24	0.207	1
FBgn0010263	CG3151	Rbp9	0.00718408	0.33466	0.513	0.403	1
FBgn0250839	CG2016	CG2016	0.00721249	0.0758066	0.106	0.074	1
FBgn0263980	CG43729	Stacl	0.00860281	0.289412	0.634	0.602	1
FBgn0052432	CG32432	CG32432	0.0125257	0.0750993	0.317	0.277	1
FBgn0266871	CR45332	lncRNA:CR45332	0.013322	0.0360123	0.124	0.094	1
FBgn0053143	CG33143	CG33143	0.0135145	0.0604353	0.292	0.253	1
FBgn0028496	CG30116	CG30116	0.0138713	-0.00785244	0.415	0.426	1
FBgn0041094	CG7590	scyl	0.0148057	0.294865	0.467	0.372	1
FBgn0031835	CG11319	CG11319	0.0150804	0.159005	0.323	0.282	1
FBgn0261574	CG7749	kug	0.015174	0.0460323	0.153	0.126	1
FBgn0030897	CG5744	Frq1	0.0155974	0.922567	0.719	0.593	1
FBgn0039617	CG14521	DIP-gamma	0.0162232	0.0234203	0.113	0.092	1
FBgn0035499	CG14996	Chd64	0.0170893	0.0302796	0.128	0.109	1
FBgn0264087	CG43756	Slob	0.0177383	0.0468917	0.237	0.204	1
FBgn0085421	CG34392	Epac	0.0181434	0.0802725	0.247	0.211	1
FBgn0030090	CG12664	fend	0.0183467	0.0744326	0.409	0.389	1
FBgn0053179	CG33179	beat-IIIb	0.0188536	-0.0430823	0.327	0.347	1
FBgn0013954	CG11001	Fkbp12	0.0194422	-0.0508172	0.469	0.502	1
FBgn0038321	CG6218	CG6218	0.0202763	0.0107946	0.11	0.102	1
FBgn0262782	CG5362	Mdh1	0.0213028	0.00752369	0.139	0.13	1
FBgn0004244	CG10537	Rdl	0.022366	1.04727	0.951	0.95	1
FBgn0034753	CG2852	CG2852	0.0235656	-0.0393661	0.362	0.39	1
FBgn0039938	CG11153	Sox102F	0.0243317	0.0570849	0.183	0.155	1
FBgn0085380	CG34351	CG34351	0.0253762	0.0434764	0.13	0.106	1
FBgn0262737	CG7437	mub	0.0254358	0.828552	0.784	0.71	1
FBgn0284245	CG8280	eEF1alpha1	0.0259025	0.0475141	0.271	0.245	1
FBgn0044328	CG32052	CG32052	0.0275535	0.0331979	0.191	0.169	1
FBgn0267336	CG34360	Glut4EF	0.0287622	1.02602	0.87	0.857	1
FBgn0259821	CG42402	CG42402	0.0296904	0.201251	0.374	0.313	1
FBgn0028645	CG7644	beat-Ib	0.0297052	0.16495	0.362	0.324	1
FBgn0052062	CG32062	Rbfox1	0.032482	1.16409	0.876	0.85	1
FBgn0038237	CG8279	Pde6	0.0336774	0.215763	0.522	0.479	1
FBgn0028704	CG18660	Nckx30C	0.0360731	0.334749	0.778	0.764	1
FBgn0042630	CG32139	Sox21b	0.0370761	0.0404611	0.113	0.092	1
FBgn0010473	CG15427	tutl	0.0377307	0.306633	0.661	0.588	1
FBgn0032400	CG6770	CG6770	0.0395045	0.388788	0.72	0.657	1
FBgn0030432	CG4404	CG4404	0.0397457	0.0313863	0.122	0.099	1
FBgn0013433	CG4846	beat-Ia	0.0410513	0.0060248	0.124	0.114	1
FBgn0037956	CG6959	CG6959	0.0413965	0.0227886	0.106	0.088	1
FBgn0010411	CG8900	RpS18	0.0428093	-0.292303	0.79	0.867	1
FBgn0039089	CG10152	beat-IV	0.0434019	0.0325014	0.155	0.134	1
FBgn0263772	CG43689	CG43689	0.0435395	0.245545	0.207	0.18	1
FBgn0037913	CG6783	fabp	0.0436036	-0.00902696	0.144	0.134	1
FBgn0085383	CG34354	CG34354	0.0463235	0.10768	0.353	0.319	1
FBgn0043364	CG4427	cbt	0.0463779	0.0268321	0.108	0.085	1
FBgn0024841	CG1963	Pcd	0.0469426	0.0143294	0.131	0.125	1
FBgn0038282	CG33485	dpr9	0.0475049	0.362147	0.453	0.369	1
FBgn0034138	CG8332	RpS15	0.047547	0.0789556	0.816	0.866	1
FBgn0033484	CG2269	CG2269	0.0482545	0.367816	0.576	0.527	1
FBgn0066084	CG30425	RpL41	0.0484332	1.90571	0.828	0.579	1
FBgn0011828	CG12002	Pxn	0.0488905	-0.022833	0.115	0.137	1
FBgn0034286	CG33996	dpr13	0.0497607	0.202382	0.439	0.388	1
FBgn0035032	CG4692	ATPsynF	0.0557594	-0.0920465	0.749	0.789	1
FBgn0052264	CG32264	CG32264	0.0568914	0.464003	0.767	0.734	1
FBgn0261262	CG42613	CG42613	0.0589334	0.587936	0.542	0.398	1
FBgn0004509	CG10772	Fur1	0.0600551	0.0327882	0.163	0.149	1
FBgn0029939	CG9650	CG9650	0.0650939	0.147614	0.262	0.237	1
FBgn0259242	CG42340	CG42340	0.0652621	0.0518357	0.249	0.222	1
FBgn0029897	CG3203	RpL17	0.0656673	-0.115138	0.597	0.649	1
FBgn0266418	CG45058	wake	0.0657931	0.0105683	0.115	0.104	1
FBgn0004880	CG1130	scrt	0.0660522	0.498135	0.916	0.935	1
FBgn0010313	CG2530	corto	0.066718	0.129206	0.34	0.282	1
FBgn0001235	CG17117	hth	0.0679116	0.340239	0.364	0.266	1
FBgn0010412	CG4464	RpS19a	0.0690383	0.0342792	0.259	0.236	1
FBgn0083949	CG34113	side-III	0.0692031	0.319449	0.517	0.471	1
FBgn0039064	CG4467	CG4467	0.069209	0.33959	0.548	0.444	1
FBgn0051774	CG31774	fred	0.0696757	0.0474736	0.256	0.235	1
FBgn0036844	CG14080	Mkp3	0.0708763	0.311471	0.535	0.438	1
FBgn0037676	CG8861	CG8861	0.0760796	0.0661129	0.326	0.296	1
FBgn0265002	CG44153	CG44153	0.0764911	0.0600227	0.303	0.275	1
FBgn0004242	CG3139	Syt1	0.0823268	0.780812	0.848	0.852	1
FBgn0263392	CG43444	Tet	0.082854	0.10934	0.645	0.642	1
FBgn0015609	CG7100	CadN	0.0835651	0.206244	0.468	0.389	1
FBgn0014184	CG16747	Oda	0.0859284	0.228777	0.613	0.58	1
FBgn0000116	CG32031	Argk	0.0913381	0.0997424	0.732	0.752	1
FBgn0000042	CG4027	Act5C	0.091473	0.129941	0.539	0.521	1
FBgn0004369	CG11516	Ptp99A	0.093551	0.623213	0.658	0.525	1
FBgn0086677	CG30040	jeb	0.0945952	0.381958	0.438	0.341	1
FBgn0038839	CG10830	Ktl	0.0967311	0.0721762	0.268	0.24	1
FBgn0085434	CG34405	NaCP60E	0.0970421	0.587656	0.706	0.619	1
FBgn0036927	CG7433	Gabat	0.100473	0.0258566	0.223	0.205	1
FBgn0001186	CG3001	Hex-A	0.102832	0.906558	0.578	0.364	1
FBgn0261836	CG42768	Msp300	0.108887	0.682515	0.707	0.623	1
FBgn0036165	CG7533	chrb	0.117068	0.454836	0.599	0.497	1
FBgn0013973	CG1470	Gycbeta100B	0.122787	0.0276135	0.155	0.134	1
FBgn0267252	CG3694	Ggamma30A	0.123079	1.02051	0.978	0.981	1
FBgn0264339	CG43795	CG43795	0.129705	0.00871772	0.113	0.104	1
FBgn0003380	CG12348	Sh	0.131025	1.4015	0.934	0.917	1
FBgn0259171	CG42276	Pde9	0.133942	0.155172	0.546	0.52	1
FBgn0037525	CG17816	CG17816	0.143061	0.15695	0.498	0.458	1
FBgn0085414	CG34385	dpr12	0.148147	0.0623664	0.424	0.407	1
FBgn0083963	CG34127	Nlg3	0.148443	0.111497	0.558	0.543	1
FBgn0050089	CG30089	CG30089	0.150817	0.0275667	0.131	0.111	1
FBgn0263220	CG43388	Hk	0.155702	0.468592	0.771	0.72	1
FBgn0010453	CG4698	Wnt4	0.159163	0.0186388	0.122	0.112	1
FBgn0263995	CG43738	cpo	0.159327	0.504714	0.813	0.792	1
FBgn0039584	CG14064	beat-VI	0.164615	0.0368614	0.302	0.287	1
FBgn0261089	CG5559	Sytalpha	0.169693	0.0169184	0.187	0.185	1
FBgn0003435	CG9218	sm	0.173227	0.890356	0.888	0.895	1
FBgn0013686	CR34094	mt:lrRNA	0.178908	5.12617	0.93	0.783	1
FBgn0261258	CG6014	rgn	0.185118	0.0443232	0.319	0.308	1
FBgn0266851	CR45312	lncRNA:CR45312	0.185366	0.0151191	0.229	0.208	1
FBgn0034978	CG3257	CG3257	0.18756	0.0296611	0.144	0.126	1
FBgn0053516	CG33516	dpr3	0.191361	0.0348133	0.15	0.134	1
FBgn0003165	CG9755	pum	0.206789	0.835366	0.795	0.693	1
FBgn0013576	CG32464	mtd	0.207369	0.468695	0.678	0.584	1
FBgn0034725	CG6044	CG6044	0.208371	0.0082563	0.328	0.33	1
FBgn0000422	CG10697	Ddc	0.21959	0.180571	0.402	0.36	1
FBgn0052647	CG32647	CG32647	0.222596	0.047559	0.269	0.248	1
FBgn0031414	CG33955	eys	0.224319	0.261151	0.475	0.423	1
FBgn0261556	CG42674	CG42674	0.235954	0.059634	0.196	0.169	1
FBgn0015400	CG4977	kek2	0.238562	0.109329	0.462	0.427	1
FBgn0264006	CG43749	dysc	0.253843	0.472006	0.789	0.756	1
FBgn0000411	CG5893	D	0.254915	0.0230169	0.11	0.096	1
FBgn0033544	CG7220	CG7220	0.255247	0.0145708	0.194	0.178	1
FBgn0051221	CG31221	CG31221	0.258858	3.6715	0.956	0.936	1
FBgn0261788	CG42734	Ank2	0.261982	0.659532	0.763	0.682	1
FBgn0039380	CG5890	CG5890	0.263111	0.00748418	0.268	0.267	1
FBgn0016061	CG31062	side	0.263598	0.114492	0.468	0.45	1
FBgn0265487	CG33197	mbl	0.264816	0.491436	0.545	0.493	1
FBgn0001091	CG12055	Gapdh1	0.270873	-0.0350684	0.307	0.316	1
FBgn0260657	CG42540	CG42540	0.272059	0.395765	0.728	0.678	1
FBgn0000575	CG1007	emc	0.276066	0.109948	0.435	0.394	1
FBgn0019650	CG11186	toy	0.277078	0.0292665	0.416	0.438	1
FBgn0019643	CG3318	AANAT1	0.277279	0.00563752	0.127	0.117	1
FBgn0250908	CG42242	beat-VII	0.279739	0.0620815	0.277	0.253	1
FBgn0003091	CG6622	Pkc53E	0.282409	0.396232	0.531	0.44	1
FBgn0266801	CG45263	CG45263	0.283079	0.102176	0.412	0.389	1
FBgn0264386	CG15899	Ca-alpha1T	0.294003	0.671571	0.618	0.536	1
FBgn0010114	CG2040	hig	0.300376	0.292536	0.592	0.551	1
FBgn0085387	CG34358	shakB	0.310803	0.272938	0.461	0.4	1
FBgn0284243	CG9277	betaTub56D	0.317566	0.0265585	0.33	0.316	1
FBgn0027608	CG2082	CG2082	0.320685	0.0717855	0.338	0.304	1
FBgn0022382	CG15862	Pka-R2	0.32352	0.146819	0.332	0.265	1
FBgn0037171	CG14459	CG14459	0.362539	0.0147591	0.15	0.139	1
FBgn0264490	CG18389	Eip93F	0.368133	0.341446	0.371	0.288	1
FBgn0052600	CG32600	dpr8	0.370717	0.134619	0.422	0.396	1
FBgn0267253	CG32700	CG32700	0.373278	0.105559	0.284	0.244	1
FBgn0033192	CG2105	Corin	0.382232	0.105409	0.284	0.239	1
FBgn0051361	CG31361	dpr17	0.383035	0.0539969	0.213	0.201	1
FBgn0003423	CG1417	slgA	0.393921	0.156374	0.401	0.335	1
FBgn0053147	CG33147	Hs3st-A	0.396303	0.476807	0.751	0.695	1
FBgn0265598	CG44425	Bx	0.398694	0.0425136	0.2	0.2	1
FBgn0017590	CG6669	klg	0.425882	0.0766914	0.496	0.468	1
FBgn0000108	CG7727	Appl	0.42721	0.800655	0.821	0.797	1
FBgn0053543	CG33543	CG33543	0.429854	0.239809	0.385	0.316	1
FBgn0262869	CG43224	Gfrl	0.429972	0.153875	0.542	0.51	1
FBgn0032797	CG10186	Hasp	0.436002	0.0786073	0.793	0.83	1
FBgn0085407	CG34378	Pvf3	0.438695	0.385553	0.466	0.381	1
FBgn0261552	CG42670	ps	0.456674	0.509202	0.925	0.951	1
FBgn0285948	CG15442	RpL27A	0.468347	0.0850018	0.701	0.737	1
FBgn0260660	CG42543	Mp	0.469072	0.0886386	0.302	0.271	1
FBgn0263397	CG8585	Ih	0.476286	1.11346	0.86	0.808	1
FBgn0000303	CG12345	ChAT	0.480138	0.0972134	0.369	0.346	1
FBgn0003429	CG10693	slo	0.482789	0.487783	0.672	0.569	1
FBgn0086758	CG31666	chinmo	0.487465	0.447558	0.735	0.681	1
FBgn0085432	CG34403	pan	0.487779	0.639006	0.767	0.725	1
FBgn0038653	CG18208	Octalpha2R	0.493546	0.125135	0.355	0.32	1
FBgn0003274	CG4918	RpLP2	0.493813	0.0784049	0.51	0.489	1
FBgn0000273	CG4379	Pka-C1	0.503636	0.398039	0.628	0.54	1
FBgn0002593	CG4087	RpLP1	0.508511	-0.0025783	0.704	0.732	1
FBgn0259244	CG42342	CG42342	0.513954	0.0844195	0.337	0.306	1
FBgn0029761	CG10706	SK	0.520229	0.373322	0.541	0.435	1
FBgn0039054	CG13830	Cow	0.529238	0.191138	0.467	0.415	1
FBgn0266137	CG18741	Dop1R2	0.530366	0.00535755	0.116	0.113	1
FBgn0285944	CG9907	para	0.559591	1.02156	0.874	0.853	1
FBgn0085400	CG34371	side-V	0.589439	0.0320312	0.139	0.131	1
FBgn0264001	CG43744	bru3	0.590244	0.566445	0.556	0.479	1
FBgn0027654	CG2239	jdp	0.592446	0.2768	0.608	0.582	1
FBgn0033250	CG14762	CG14762	0.609798	0.0944458	0.548	0.534	1
FBgn0039647	CG14509	jus	0.619996	0.116886	0.498	0.467	1
FBgn0264895	CG44086	RapGAP1	0.628543	0.263829	0.487	0.431	1
FBgn0031697	CG14024	CG14024	0.635843	0.00889234	0.146	0.144	1
FBgn0000064	CG6058	Ald1	0.636719	0.0263985	0.601	0.613	1
FBgn0013981	CG3379	His4r	0.637635	0.349316	0.94	0.949	1
FBgn0030412	CG17762	Tomosyn	0.641628	0.315462	0.595	0.519	1
FBgn0267978	CG8376	ap	0.644819	0.00269585	0.161	0.16	1
FBgn0000535	CG10952	eag	0.644899	0.0680112	0.296	0.288	1
FBgn0032901	CG9339	sky	0.649256	0.108467	0.461	0.42	1
FBgn0263353	CG11000	CG11000	0.672733	0.235956	0.468	0.391	1
FBgn0040823	CG14162	dpr6	0.687162	0.0587321	0.332	0.317	1
FBgn0261597	CG10305	RpS26	0.708258	-0.0388198	0.757	0.799	1
FBgn0004611	CG4574	Plc21C	0.756909	0.109595	0.388	0.358	1
FBgn0038063	CG33976	Octbeta2R	0.773742	0.265034	0.52	0.44	1
FBgn0000036	CG5610	nAChRalpha1	0.785332	0.106753	0.428	0.405	1
FBgn0261549	CG42667	rdgA	0.810596	0.163224	0.435	0.393	1
FBgn0028875	CG32975	nAChRalpha5	0.831323	0.638054	0.75	0.67	1
FBgn0029814	CG15765	CG15765	0.851176	0.229502	0.523	0.466	1
FBgn0015399	CG12283	kek1	0.89486	0.211687	0.452	0.397	1
FBgn0265296	CG42256	Dscam2	0.895273	0.573564	0.774	0.734	1
FBgn0261804	CG42750	CG42750	0.925938	0.0901355	0.424	0.398	1
FBgn0000024	CG17907	Ace	0.945454	0.380617	0.642	0.582	1
FBgn0261244	CG33174	inaE	0.977613	0.176506	0.444	0.395	1
FBgn0038826	CG17838	Syp	0.978166	0.270722	0.502	0.432	1
FBgn0024963	CG7535	GluClalpha	0.988098	0.528747	0.752	0.684	1

## Sheet: Global_C7
FlyBaseID	GeneID	Gene symbol	p_val	avg_diff	pct.1	pct.2	p_val_adj
FBgn0019660	CR32665	lncRNA:roX2	0	-2.03684	0.006	0.779	0
FBgn0004047	CG11129	Yp3	1.04071e-81	0.120079	0.105	0.003	1.56106e-78
FBgn0058469	CR40469	lncRNA:CR40469	1.63382e-23	0.0931797	0.151	0.076	2.45072e-20
FBgn0002940	CG4550	ninaE	2.3222e-22	-0.0920615	0.099	0.198	3.4833e-19
FBgn0052057	CG32057	dpr10	2.4841e-19	0.173254	0.263	0.155	3.72615e-16
FBgn0052982	CG32982	CG32982	4.15502e-18	0.172233	0.265	0.175	6.23254e-15
FBgn0087002	CG11064	apolpp	4.72536e-18	0.0916271	0.13	0.064	7.08805e-15
FBgn0051690	CG31690	CG31690	1.20616e-17	0.209906	0.345	0.231	1.80924e-14
FBgn0004595	CG17228	pros	1.4506e-17	6.31818	0.993	0.997	2.1759e-14
FBgn0004619	CG8442	GluRIA	5.49738e-16	0.271122	0.276	0.14	8.24607e-13
FBgn0004652	CG14307	fru	2.06512e-15	0.39888	0.331	0.16	3.09769e-12
FBgn0260429	CG42524	CG42524	1.76268e-13	0.149	0.258	0.17	2.64402e-10
FBgn0052521	CG32521	CG32521	5.56834e-13	0.0745934	0.167	0.106	8.35251e-10
FBgn0050115	CG30115	GEFmeso	1.34529e-12	0.0660043	0.103	0.052	2.01794e-09
FBgn0029768	CG16752	SPR	1.40876e-12	0.186445	0.209	0.12	2.11313e-09
FBgn0065099	CR33925	snRNA:7SK	1.07093e-11	1.99877	0.811	0.657	1.6064e-08
FBgn0087012	CG1056	5-HT2A	1.31525e-11	0.0869703	0.105	0.052	1.97288e-08
FBgn0036821	CG3961	CG3961	1.34035e-10	0.164459	0.242	0.161	2.01052e-07
FBgn0000121	CG5962	Arr2	4.41761e-10	-0.0576143	0.087	0.139	6.62642e-07
FBgn0085753	CR40596	28SrRNA-Psi:CR40596	7.82336e-10	0.101299	0.174	0.103	1.1735e-06
FBgn0052683	CG32683	CG32683	7.99281e-10	0.108026	0.182	0.121	1.19892e-06
FBgn0053087	CG33087	LRP1	3.51535e-09	0.0427859	0.122	0.08	5.27303e-06
FBgn0033356	CG8229	CG8229	5.57701e-09	-0.0337795	0.147	0.172	8.36551e-06
FBgn0004168	CG16720	5-HT1A	8.6413e-09	0.146366	0.256	0.18	1.2962e-05
FBgn0031299	CG4629	CG4629	3.79571e-08	0.0585174	0.148	0.102	5.69357e-05
FBgn0085420	CG34391	DIP-delta	4.22398e-08	0.14042	0.279	0.21	6.33597e-05
FBgn0051092	CG31092	LpR2	7.28501e-08	0.0591326	0.136	0.087	0.000109275
FBgn0041605	CG32490	cpx	7.77716e-08	1.11419	0.985	0.979	0.000116657
FBgn0051619	CG31619	nolo	8.96958e-08	0.146039	0.324	0.239	0.000134544
FBgn0003301	CG9533	rut	1.2256e-07	0.101686	0.271	0.2	0.00018384
FBgn0250867	CG42238	CG42238	1.31359e-07	0.100072	0.246	0.182	0.000197038
FBgn0013995	CG5685	Calx	1.409e-07	0.235208	0.289	0.205	0.00021135
FBgn0014859	CG1864	Hr38	2.47134e-07	-0.0733329	0.308	0.271	0.000370701
FBgn0264090	CG43759	CG43759	3.44488e-07	0.184367	0.257	0.176	0.000516731
FBgn0004607	CG1449	zfh2	5.64197e-07	0.0809365	0.131	0.082	0.000846295
FBgn0035050	CG4871	SiaT	9.11084e-07	0.123226	0.136	0.082	0.00136663
FBgn0036789	CG13702	AstC-R2	1.05063e-06	0.115333	0.192	0.141	0.00157595
FBgn0037963	CG6977	Cad87A	1.07321e-06	0.0599448	0.11	0.067	0.00160982
FBgn0051163	CG31163	SKIP	1.17394e-06	0.232715	0.403	0.31	0.0017609
FBgn0261260	CG42611	mgl	1.57462e-06	0.0473207	0.135	0.111	0.00236193
FBgn0260971	CG42594	CG42594	2.04276e-06	0.215424	0.313	0.231	0.00306414
FBgn0052066	CG32066	CG32066	2.06101e-06	0.0482944	0.156	0.125	0.00309152
FBgn0013973	CG1470	Gycbeta100B	3.58101e-06	0.0954631	0.214	0.153	0.00537151
FBgn0085399	CG34370	CG34370	4.19091e-06	0.0789602	0.246	0.201	0.00628637
FBgn0264442	CG43860	ab	4.3352e-06	-0.013784	0.316	0.316	0.00650281
FBgn0083228	CG5907	Frq2	7.22384e-06	0.354209	0.425	0.311	0.0108358
FBgn0260658	CG42541	CG42541	7.73663e-06	0.0677399	0.386	0.346	0.0116049
FBgn0000547	CG12676	ed	8.71014e-06	0.113376	0.236	0.172	0.0130652
FBgn0283499	CG18402	InR	9.17712e-06	0.0340096	0.21	0.191	0.0137657
FBgn0261649	CG31247	tinc	1.00205e-05	0.0736571	0.164	0.111	0.0150307
FBgn0020621	CG2049	Pkn	1.28539e-05	0.0509887	0.103	0.061	0.0192809
FBgn0001234	CR31400	lncRNA:Hsromega	1.41852e-05	1.40078	0.982	0.99	0.0212779
FBgn0030913	CG6123	CG6123	2.00736e-05	0.100586	0.189	0.125	0.0301104
FBgn0050361	CG30361	mtt	2.03758e-05	0.0545861	0.102	0.064	0.0305637
FBgn0004880	CG1130	scrt	2.38804e-05	0.733438	0.934	0.932	0.0358207
FBgn0038641	CG7708	ChT	3.86713e-05	0.0382019	0.268	0.251	0.0580069
FBgn0262473	CG5490	Tl	4.34422e-05	0.0771689	0.169	0.124	0.0651633
FBgn0050463	CG30463	Pgant9	4.41963e-05	0.11876	0.259	0.189	0.0662945
FBgn0267322	CR45758	lncRNA:CR45758	4.48731e-05	0.0565999	0.194	0.164	0.0673097
FBgn0261285	CG5629	Ppcs	4.92382e-05	0.0634823	0.152	0.108	0.0738574
FBgn0013718	CG33991	nuf	5.07334e-05	0.0472565	0.103	0.067	0.0761
FBgn0261648	CG6464	salm	5.07395e-05	0.0835998	0.162	0.125	0.0761092
FBgn0265052	CG44167	St3	5.41145e-05	0.0725368	0.177	0.127	0.0811717
FBgn0261046	CG31190	Dscam3	6.58325e-05	0.0300088	0.234	0.218	0.0987487
FBgn0263397	CG8585	Ih	6.90896e-05	1.56039	0.896	0.847	0.103634
FBgn0003499	CG7847	sr	6.91152e-05	0.0896593	0.149	0.096	0.103673
FBgn0033987	CG12424	ckn	8.64589e-05	0.0987631	0.197	0.134	0.129688
FBgn0019662	CG8593	qm	8.71935e-05	0.0624369	0.18	0.144	0.13079
FBgn0031530	CG3254	Pgant2	9.36008e-05	0.0453144	0.151	0.121	0.140401
FBgn0015777	CG9261	nrv2	0.000112167	0.0422092	0.149	0.115	0.168251
FBgn0036144	CG6207	GlcAT-P	0.000132708	-0.000388418	0.274	0.272	0.199062
FBgn0051708	CG31708	DIP-zeta	0.000133845	0.057274	0.105	0.078	0.200767
FBgn0030272	CG15201	CG15201	0.00013634	0.0470499	0.14	0.104	0.20451
FBgn0264753	CG44011	Rgk1	0.00014815	0.116937	0.232	0.18	0.222224
FBgn0052206	CG32206	CG32206	0.000189149	0.102785	0.292	0.228	0.283724
FBgn0085397	CG34368	Fili	0.000189285	0.0468755	0.112	0.079	0.283928
FBgn0015774	CG10521	NetB	0.000197253	0.075795	0.228	0.186	0.29588
FBgn0019985	CG11144	mGluR	0.000229072	0.0784433	0.227	0.187	0.343608
FBgn0265595	CG44422	CG44422	0.000237354	0.234643	0.322	0.228	0.356032
FBgn0051324	CG31324	CG31324	0.000239441	0.148795	0.314	0.243	0.359161
FBgn0259677	CG42346	CG42346	0.000239522	0.0761353	0.174	0.133	0.359283
FBgn0002945	CG11614	nkd	0.000250301	0.124576	0.281	0.22	0.375452
FBgn0250869	CG42240	CG42240	0.000263175	0.0335719	0.115	0.086	0.394763
FBgn0036801	CG6896	MYPT-75D	0.000285536	0.0979209	0.293	0.244	0.428304
FBgn0052626	CG32626	AMPdeam	0.000295393	0.0256559	0.183	0.166	0.44309
FBgn0020269	CG10145	mspo	0.000343169	0.116654	0.245	0.19	0.514753
FBgn0040153	CG32597	l(1)G0469	0.000366525	0.0334361	0.107	0.077	0.549788
FBgn0086604	CG12484	side-VIII	0.000421955	0.119599	0.259	0.2	0.632932
FBgn0038246	CG14853	CG14853	0.000532518	0.0401537	0.171	0.142	0.798778
FBgn0037676	CG8861	CG8861	0.000547443	0.237566	0.399	0.334	0.821164
FBgn0004198	CG11387	ct	0.000562324	0.388888	0.223	0.127	0.843486
FBgn0264794	CR44024	lncRNA:CR44024	0.000596544	0.134721	0.384	0.334	0.894816
FBgn0033249	CG11191	CG11191	0.00070861	-0.0201079	0.128	0.146	1
FBgn0024321	CG8524	NK7.1	0.000725512	0.0676618	0.214	0.169	1
FBgn0013688	CR34096	mt:srRNA	0.000760454	0.0477037	0.162	0.121	1
FBgn0052698	CG32698	CARPB	0.00078495	0.105193	0.139	0.094	1
FBgn0263219	CG42330	Dscam4	0.000820957	0.0902275	0.194	0.137	1
FBgn0041097	CG5423	robo3	0.000830119	0.0150616	0.163	0.146	1
FBgn0029663	CG10804	CG10804	0.000869701	0.0754965	0.226	0.175	1
FBgn0029123	CG18024	SoxN	0.000892241	0.173758	0.157	0.104	1
FBgn0283651	CG46301	CG46301	0.000902661	0.103683	0.217	0.18	1
FBgn0031738	CG9171	CG9171	0.000949525	0.0363101	0.174	0.15	1
FBgn0264273	CG33960	Sema2b	0.000953849	0.13182	0.265	0.206	1
FBgn0260442	CG6831	rhea	0.00101316	0.0225967	0.112	0.093	1
FBgn0243512	CG7850	puc	0.00103693	-0.0226599	0.088	0.103	1
FBgn0259245	CG42343	DIP-beta	0.00108046	0.0558466	0.122	0.09	1
FBgn0040765	CG33473	luna	0.00126465	0.223016	0.338	0.258	1
FBgn0038542	CG7431	TyrR	0.00133403	0.0493516	0.106	0.075	1
FBgn0262614	CG43140	pyd	0.00146135	0.168894	0.33	0.279	1
FBgn0261804	CG42750	CG42750	0.00148856	0.149698	0.446	0.369	1
FBgn0024944	CG3856	Oamb	0.00155206	0.0485512	0.118	0.087	1
FBgn0001085	CG17697	fz	0.00160704	0.0626091	0.174	0.131	1
FBgn0029897	CG3203	RpL17	0.00173108	-0.224942	0.708	0.776	1
FBgn0003274	CG4918	RpLP2	0.00176502	-0.022418	0.579	0.619	1
FBgn0028369	CG3653	kirre	0.00200221	0.197035	0.343	0.249	1
FBgn0002868	CG9470	MtnA	0.00206628	0.271518	0.305	0.166	1
FBgn0051361	CG31361	dpr17	0.00209285	0.0600593	0.168	0.123	1
FBgn0000097	CG3166	aop	0.00218149	0.0572408	0.22	0.175	1
FBgn0263994	CG43737	CG43737	0.00228392	0.320203	0.598	0.519	1
FBgn0029814	CG15765	CG15765	0.00251727	0.0868976	0.539	0.515	1
FBgn0033368	CG13743	CG13743	0.00251984	0.0453903	0.184	0.156	1
FBgn0029824	CG3726	CG3726	0.00255707	0.0858907	0.166	0.127	1
FBgn0262636	CG2052	dati	0.00265449	0.349117	0.53	0.462	1
FBgn0051814	CG31814	DIP-kappa	0.00265639	0.0623994	0.144	0.115	1
FBgn0003360	CG16944	sesB	0.00270939	0.0936483	0.889	0.921	1
FBgn0030574	CG9413	sbm	0.00276649	0.0455476	0.161	0.122	1
FBgn0004395	CG4620	unk	0.00293487	0.063127	0.187	0.147	1
FBgn0000636	CG5803	Fas3	0.00301071	0.074068	0.199	0.156	1
FBgn0085390	CG34361	Dgk	0.00341683	0.0492916	0.149	0.112	1
FBgn0267252	CG3694	Ggamma30A	0.00411578	1.23356	0.917	0.916	1
FBgn0035495	CG14989	CG14989	0.00414945	0.3628	0.354	0.294	1
FBgn0263706	CG43658	CG43658	0.00456039	0.020889	0.161	0.149	1
FBgn0085426	CG34397	Rgk3	0.00465105	0.0590973	0.137	0.107	1
FBgn0028888	CG4168	CG4168	0.00497982	0.0335869	0.157	0.132	1
FBgn0026411	CG11354	Lim1	0.00502974	0.259186	0.316	0.267	1
FBgn0028704	CG18660	Nckx30C	0.00503123	0.439411	0.783	0.764	1
FBgn0025525	CG9102	bab2	0.00516948	0.061216	0.136	0.103	1
FBgn0042696	CG2380	NfI	0.00519664	0.098075	0.23	0.165	1
FBgn0001297	CG33956	kay	0.00621476	0.0132223	0.104	0.088	1
FBgn0263773	CG43690	fok	0.00643898	0.104603	0.207	0.147	1
FBgn0025360	CG18455	Optix	0.00684929	0.0536595	0.14	0.117	1
FBgn0001319	CG10197	kn	0.00722782	0.0718466	0.103	0.074	1
FBgn0050419	CG30419	CG30419	0.00754439	0.0753231	0.182	0.141	1
FBgn0260660	CG42543	Mp	0.00766583	0.127367	0.329	0.265	1
FBgn0000179	CG3578	bi	0.00780727	0.23867	0.257	0.2	1
FBgn0085395	CG34366	Shawl	0.00836286	0.0227958	0.139	0.118	1
FBgn0033405	CG13954	CG13954	0.00879688	0.129551	0.258	0.197	1
FBgn0266100	CG44837	CG44837	0.00899073	0.0454471	0.122	0.09	1
FBgn0032666	CG5758	CG5758	0.00906965	0.129798	0.276	0.209	1
FBgn0003165	CG9755	pum	0.00939972	0.788534	0.827	0.724	1
FBgn0085410	CG34381	TrissinR	0.0101024	0.0491675	0.118	0.087	1
FBgn0051646	CG31646	DIP-theta	0.0101251	0.0980386	0.159	0.127	1
FBgn0011818	CG9884	oaf	0.0109259	0.0471024	0.172	0.148	1
FBgn0066084	CG30425	RpL41	0.0111121	2.37493	0.865	0.68	1
FBgn0285963	CG46339	CG46339	0.011959	0.068093	0.215	0.176	1
FBgn0085391	CG34362	trv	0.0122516	0.974372	0.716	0.633	1
FBgn0083949	CG34113	side-III	0.0123297	0.308303	0.494	0.441	1
FBgn0001078	CG4059	ftz-f1	0.0125858	0.108608	0.393	0.359	1
FBgn0023095	CG11282	caps	0.012957	0.0548354	0.162	0.122	1
FBgn0261574	CG7749	kug	0.0134575	0.0283556	0.196	0.175	1
FBgn0038980	CG6919	Octbeta1R	0.013993	-0.0171343	0.137	0.13	1
FBgn0035756	CG32381	unc-13-4A	0.0160577	0.0642901	0.215	0.183	1
FBgn0010300	CG10719	brat	0.0160812	0.108724	0.292	0.233	1
FBgn0039349	CG4685	Ssadh	0.0162716	-0.0484966	0.185	0.222	1
FBgn0032833	CG10664	COX4	0.016547	-0.502798	0.861	0.907	1
FBgn0085370	CG34341	Pde11	0.0170492	0.0270084	0.13	0.109	1
FBgn0039420	CG6154	CG6154	0.0173924	0.0610405	0.245	0.213	1
FBgn0037913	CG6783	fabp	0.0187348	-0.0360319	0.166	0.184	1
FBgn0083963	CG34127	Nlg3	0.0196382	0.139045	0.559	0.516	1
FBgn0264895	CG44086	RapGAP1	0.0200716	0.230318	0.436	0.364	1
FBgn0031770	CG13995	CG13995	0.0202499	-0.0036124	0.155	0.162	1
FBgn0085382	CG34353	CG34353	0.0203494	0.0337421	0.245	0.221	1
FBgn0001091	CG12055	Gapdh1	0.0203562	-0.074373	0.385	0.427	1
FBgn0036935	CG14186	CG14186	0.0203807	0.0465085	0.155	0.116	1
FBgn0032151	CG4128	nAChRalpha6	0.0204851	1.02527	0.742	0.647	1
FBgn0015519	CG2302	nAChRalpha3	0.0210225	0.148679	0.381	0.316	1
FBgn0052506	CG32506	CG32506	0.0236333	0.0753499	0.231	0.19	1
FBgn0033196	CG1358	CG1358	0.0239461	0.0202074	0.112	0.092	1
FBgn0085412	CG34383	kmr	0.0243856	0.10726	0.321	0.273	1
FBgn0053517	CG33517	Dop2R	0.0245308	1.5638	0.8	0.742	1
FBgn0086680	CG10037	vvl	0.024849	0.144324	0.231	0.194	1
FBgn0259234	CG42332	Camta	0.0250608	0.0628927	0.32	0.283	1
FBgn0031306	CG4577	CG4577	0.0262042	0.0645791	0.143	0.102	1
FBgn0033159	CG17800	Dscam1	0.0269413	0.0501541	0.147	0.116	1
FBgn0260943	CG32169	Rbp6	0.0272531	1.86421	0.871	0.819	1
FBgn0010113	CG15532	hdc	0.0284096	0.965761	0.721	0.624	1
FBgn0034636	CG10440	twz	0.0284917	0.0114642	0.118	0.1	1
FBgn0264308	CG43778	CG43778	0.028695	0.0795208	0.311	0.279	1
FBgn0010434	CG11949	cora	0.0295866	0.0212303	0.129	0.111	1
FBgn0015400	CG4977	kek2	0.0297531	-0.0092589	0.374	0.371	1
FBgn0030505	CG11172	NFAT	0.0307224	0.0518479	0.245	0.207	1
FBgn0040805	CG12355	CG12355	0.0317827	-0.0129997	0.14	0.159	1
FBgn0259212	CG42312	cno	0.033295	0.0381442	0.142	0.115	1
FBgn0264490	CG18389	Eip93F	0.0333167	0.224333	0.264	0.196	1
FBgn0052204	CG32204	CG32204	0.034706	0.0126947	0.113	0.108	1
FBgn0085413	CG34384	CG34384	0.0372592	0.11652	0.28	0.22	1
FBgn0036454	CG17839	CG17839	0.0383916	0.0507212	0.142	0.115	1
FBgn0261509	CG14351	haf	0.0385395	0.0852893	0.176	0.142	1
FBgn0264001	CG43744	bru3	0.04023	0.316641	0.482	0.418	1
FBgn0003091	CG6622	Pkc53E	0.0403156	0.301819	0.462	0.402	1
FBgn0016797	CG9739	fz2	0.0435426	0.0490787	0.249	0.226	1
FBgn0259170	CG42275	alpha-Man-Ia	0.0446528	0.0553084	0.229	0.195	1
FBgn0267001	CG42338	Ten-a	0.0455904	1.61859	0.891	0.806	1
FBgn0027654	CG2239	jdp	0.0460724	0.128223	0.496	0.462	1
FBgn0040297	CG9256	Nhe2	0.0467676	0.0145298	0.134	0.115	1
FBgn0028481	CG4341	CG4341	0.0473721	0.0910343	0.267	0.221	1
FBgn0261698	CG42732	SLO2	0.047496	0.137296	0.373	0.316	1
FBgn0004580	CG6702	Cbp53E	0.051714	1.29051	0.608	0.508	1
FBgn0000633	CG17716	CG17716	0.0532252	0.270016	0.515	0.5	1
FBgn0085447	CG34418	sif	0.056242	1.14293	0.748	0.62	1
FBgn0028407	CG8364	Drep3	0.0577866	0.0332542	0.123	0.104	1
FBgn0004242	CG3139	Syt1	0.0594427	0.849409	0.865	0.862	1
FBgn0000287	CG4881	salr	0.0598657	0.15705	0.238	0.208	1
FBgn0265194	CG44240	Trpm	0.061733	0.00379965	0.103	0.1	1
FBgn0030090	CG12664	fend	0.0621748	0.0739214	0.496	0.495	1
FBgn0085384	CG34355	CG34355	0.0648784	0.0598025	0.194	0.161	1
FBgn0001186	CG3001	Hex-A	0.0651474	1.04201	0.681	0.458	1
FBgn0011224	CG31000	heph	0.0684161	0.400632	0.406	0.328	1
FBgn0052183	CG32183	Ccn	0.0686131	0.0249326	0.213	0.2	1
FBgn0033438	CG1794	Mmp2	0.0691951	-0.00398048	0.308	0.292	1
FBgn0004910	CG15855	Eip63F-1	0.0705275	0.0523605	0.164	0.132	1
FBgn0000635	CG3665	Fas2	0.0719149	0.199236	0.255	0.172	1
FBgn0000422	CG10697	Ddc	0.0731645	0.124915	0.296	0.25	1
FBgn0033446	CG1648	CG1648	0.0738213	-0.0174606	0.284	0.296	1
FBgn0036927	CG7433	Gabat	0.0744562	-0.0130992	0.302	0.318	1
FBgn0033403	CG13739	CG13739	0.0748884	0.13636	0.196	0.135	1
FBgn0034753	CG2852	CG2852	0.0767725	-0.0543529	0.431	0.45	1
FBgn0039209	CG13624	REPTOR	0.0776944	0.0671343	0.243	0.206	1
FBgn0016061	CG31062	side	0.078068	0.112964	0.414	0.359	1
FBgn0260793	CG42573	2mit	0.0800607	0.0065036	0.195	0.193	1
FBgn0002643	CG8118	mam	0.0807805	0.0648926	0.236	0.203	1
FBgn0041094	CG7590	scyl	0.0824652	0.173105	0.478	0.407	1
FBgn0039054	CG13830	Cow	0.0826266	0.097861	0.576	0.539	1
FBgn0260941	CG42318	app	0.0831179	0.0637455	0.202	0.174	1
FBgn0267579	CR45919	lncRNA:CR45919	0.0833949	0.0237545	0.112	0.088	1
FBgn0010114	CG2040	hig	0.0858608	0.21005	0.601	0.572	1
FBgn0030897	CG5744	Frq1	0.0878469	0.823834	0.71	0.606	1
FBgn0261262	CG42613	CG42613	0.0881904	0.600944	0.584	0.45	1
FBgn0027356	CG8604	Amph	0.089968	0.0395726	0.149	0.12	1
FBgn0264386	CG15899	Ca-alpha1T	0.093262	0.398081	0.396	0.316	1
FBgn0263930	CG4974	dally	0.0933821	0.0754301	0.286	0.265	1
FBgn0262737	CG7437	mub	0.0968607	0.613872	0.661	0.618	1
FBgn0263392	CG43444	Tet	0.0990166	0.13655	0.509	0.49	1
FBgn0032400	CG6770	CG6770	0.101858	0.416744	0.752	0.682	1
FBgn0264606	CG43955	Fife	0.10207	0.0717974	0.282	0.26	1
FBgn0024189	CG33141	sns	0.10355	0.020492	0.138	0.123	1
FBgn0023179	CG6438	amon	0.104889	0.144315	0.349	0.278	1
FBgn0010263	CG3151	Rbp9	0.108221	0.195381	0.517	0.487	1
FBgn0019650	CG11186	toy	0.108771	-0.0234174	0.265	0.296	1
FBgn0267910	CR34335	lncRNA:CR34335	0.109312	10.3033	0.987	0.894	1
FBgn0015399	CG12283	kek1	0.109587	0.182926	0.492	0.431	1
FBgn0263353	CG11000	CG11000	0.109707	0.179213	0.482	0.438	1
FBgn0036494	CG7250	Toll-6	0.111744	0.272418	0.423	0.339	1
FBgn0004858	CG4220	elB	0.113573	0.0298461	0.217	0.194	1
FBgn0040397	CG3655	CG3655	0.117865	0.031999	0.156	0.138	1
FBgn0261597	CG10305	RpS26	0.122781	0.0488133	0.782	0.806	1
FBgn0037525	CG17816	CG17816	0.12417	0.2139	0.55	0.524	1
FBgn0024963	CG7535	GluClalpha	0.124403	0.597671	0.706	0.656	1
FBgn0028370	CG4192	kek3	0.124906	0.0597265	0.156	0.129	1
FBgn0052432	CG32432	CG32432	0.133753	0.0709714	0.332	0.282	1
FBgn0260462	CG12163	CG12163	0.137017	-0.00138354	0.149	0.147	1
FBgn0039089	CG10152	beat-IV	0.137755	-0.0334649	0.228	0.253	1
FBgn0261555	CG42673	CG42673	0.137841	-0.0208836	0.123	0.137	1
FBgn0014163	CG4609	fax	0.143519	0.45453	0.547	0.445	1
FBgn0261588	CG42698	pdm3	0.14592	0.13131	0.28	0.248	1
FBgn0052264	CG32264	CG32264	0.150367	0.497569	0.732	0.685	1
FBgn0261928	CG42795	CG42795	0.154204	0.154679	0.384	0.343	1
FBgn0005775	CG7503	Con	0.155067	0.395329	0.382	0.285	1
FBgn0038498	CG14334	beat-IIa	0.155634	0.183279	0.336	0.278	1
FBgn0037153	CG12673	olf413	0.158362	0.0898048	0.299	0.264	1
FBgn0014184	CG16747	Oda	0.163689	0.316729	0.706	0.685	1
FBgn0027608	CG2082	CG2082	0.166862	0.0475817	0.326	0.291	1
FBgn0003326	CG17579	sca	0.167022	-0.00795134	0.099	0.109	1
FBgn0051760	CG31760	CG31760	0.168296	0.0364557	0.124	0.103	1
FBgn0038826	CG17838	Syp	0.169865	0.409395	0.642	0.576	1
FBgn0085409	CG34380	smal	0.17064	0.0629483	0.248	0.225	1
FBgn0013467	CG18285	igl	0.180225	0.611513	0.672	0.617	1
FBgn0039647	CG14509	jus	0.187956	0.0647898	0.61	0.592	1
FBgn0052677	CG32677	X11Lbeta	0.190271	0.16728	0.417	0.347	1
FBgn0003423	CG1417	slgA	0.190768	0.150071	0.5	0.477	1
FBgn0283451	CG11491	br	0.194845	0.280254	0.295	0.273	1
FBgn0031971	CG7224	Sirup	0.195189	0.0170315	0.157	0.144	1
FBgn0001225	CG4183	Hsp26	0.195402	-0.0913596	0.144	0.164	1
FBgn0032797	CG10186	Hasp	0.199104	0.00095125	0.824	0.848	1
FBgn0004369	CG11516	Ptp99A	0.200911	0.443222	0.613	0.536	1
FBgn0028645	CG7644	beat-Ib	0.204169	0.0847019	0.265	0.217	1
FBgn0261552	CG42670	ps	0.205933	0.709814	0.951	0.953	1
FBgn0083975	CG34139	Nlg4	0.208455	0.0406587	0.174	0.151	1
FBgn0259111	CG42253	Ndae1	0.210222	0.0175987	0.155	0.141	1
FBgn0004509	CG10772	Fur1	0.213033	0.0109506	0.194	0.197	1
FBgn0029761	CG10706	SK	0.220033	0.382487	0.594	0.515	1
FBgn0262593	CG43128	Shab	0.221643	0.223295	0.511	0.476	1
FBgn0265002	CG44153	CG44153	0.225527	-0.00262583	0.154	0.163	1
FBgn0026160	CG7958	tna	0.225724	0.226544	0.404	0.325	1
FBgn0051774	CG31774	fred	0.22914	0.0450126	0.228	0.2	1
FBgn0001226	CG4466	Hsp27	0.229861	-0.0769143	0.104	0.121	1
FBgn0015229	CG6575	glec	0.232098	0.198891	0.298	0.204	1
FBgn0038494	CG4135	beat-IIb	0.236852	0.0289184	0.149	0.129	1
FBgn0011661	CG10701	Moe	0.249192	0.000416239	0.162	0.175	1
FBgn0085421	CG34392	Epac	0.249887	0.0426436	0.185	0.16	1
FBgn0011582	CG9652	Dop1R1	0.253542	0.00277136	0.183	0.178	1
FBgn0015609	CG7100	CadN	0.257945	0.190101	0.489	0.415	1
FBgn0034138	CG8332	RpS15	0.261487	0.0440047	0.861	0.889	1
FBgn0051345	CG31345	CG31345	0.261571	0.0564811	0.208	0.19	1
FBgn0051721	CG31721	Trim9	0.264938	0.0341273	0.125	0.102	1
FBgn0037015	CG13253	cmpy	0.267052	0.0661884	0.278	0.242	1
FBgn0265597	CG44424	rad	0.268241	0.154515	0.276	0.239	1
FBgn0260003	CG34157	Dys	0.268501	0.0373812	0.164	0.136	1
FBgn0263257	CG43395	Cngl	0.271634	0.763439	0.697	0.602	1
FBgn0259243	CG42341	Pka-R1	0.271856	0.0780271	0.296	0.249	1
FBgn0264815	CG44007	Pde1c	0.272577	0.0983554	0.303	0.268	1
FBgn0085434	CG34405	NaCP60E	0.274913	0.575365	0.737	0.69	1
FBgn0027589	CG1688	CG1688	0.278673	0.0183637	0.156	0.141	1
FBgn0264339	CG43795	CG43795	0.280669	0.0370399	0.171	0.151	1
FBgn0261788	CG42734	Ank2	0.282999	0.682415	0.821	0.773	1
FBgn0000108	CG7727	Appl	0.285533	0.585087	0.831	0.82	1
FBgn0010313	CG2530	corto	0.28681	0.0695247	0.386	0.377	1
FBgn0284245	CG8280	eEF1alpha1	0.289178	0.0706493	0.306	0.271	1
FBgn0028496	CG30116	CG30116	0.292429	0.0849448	0.331	0.305	1
FBgn0066101	CG31094	LpR1	0.294226	0.0543839	0.206	0.186	1
FBgn0263995	CG43738	cpo	0.29544	0.496895	0.824	0.84	1
FBgn0022382	CG15862	Pka-R2	0.295578	0.10082	0.341	0.302	1
FBgn0013954	CG11001	Fkbp12	0.300123	0.0125589	0.426	0.422	1
FBgn0259213	CG42313	side-II	0.302219	0.0433766	0.371	0.364	1
FBgn0261549	CG42667	rdgA	0.304016	0.130338	0.29	0.252	1
FBgn0037941	CG12594	CG12594	0.314811	0.0337849	0.136	0.123	1
FBgn0035170	CG12191	dpr20	0.32726	-0.0081846	0.117	0.127	1
FBgn0000024	CG17907	Ace	0.32797	0.425704	0.671	0.645	1
FBgn0000064	CG6058	Ald1	0.32869	0.0320258	0.66	0.655	1
FBgn0000303	CG12345	ChAT	0.333037	0.0394421	0.462	0.47	1
FBgn0261871	CG33507	dpr2	0.334217	0.0182621	0.126	0.114	1
FBgn0031374	CG7337	Wdr62	0.338263	0.182663	0.492	0.442	1
FBgn0261258	CG6014	rgn	0.341922	0.0890954	0.33	0.308	1
FBgn0267033	CG45477	mamo	0.342043	0.611999	0.381	0.287	1
FBgn0031294	CG31795	IA-2	0.345431	1.93439	0.924	0.89	1
FBgn0040532	CG8369	CG8369	0.348892	0.0442444	0.16	0.141	1
FBgn0264503	CG43902	CG43902	0.350718	0.157096	0.315	0.273	1
FBgn0038321	CG6218	CG6218	0.352908	0.0185456	0.138	0.121	1
FBgn0053202	CG33202	dpr11	0.355929	0.0397663	0.266	0.241	1
FBgn0262160	CG9932	CG9932	0.357627	0.115993	0.295	0.24	1
FBgn0053516	CG33516	dpr3	0.357796	0.0307278	0.123	0.101	1
FBgn0050089	CG30089	CG30089	0.358018	0.00937982	0.105	0.101	1
FBgn0030723	CG14948	dpr18	0.359213	0.0169427	0.107	0.095	1
FBgn0286778	CG46385	CG46385	0.359732	0.129112	0.32	0.251	1
FBgn0003380	CG12348	Sh	0.366905	1.29311	0.924	0.921	1
FBgn0031736	CG11030	CG11030	0.371187	0.0819166	0.386	0.368	1
FBgn0013576	CG32464	mtd	0.371943	0.426026	0.724	0.655	1
FBgn0262509	CG43079	nrm	0.37369	0.0145116	0.213	0.211	1
FBgn0261988	CG17998	Gprk2	0.374856	0.243568	0.45	0.354	1
FBgn0043364	CG4427	cbt	0.378062	0.0140601	0.101	0.09	1
FBgn0085387	CG34358	shakB	0.37816	0.215499	0.604	0.579	1
FBgn0085383	CG34354	CG34354	0.379978	0.073686	0.345	0.313	1
FBgn0259171	CG42276	Pde9	0.381675	0.100511	0.499	0.494	1
FBgn0039064	CG4467	CG4467	0.384217	0.225594	0.505	0.452	1
FBgn0000028	CG9151	acj6	0.386216	0.336879	0.325	0.304	1
FBgn0259789	CG12701	zld	0.388854	0.0699816	0.229	0.2	1
FBgn0259244	CG42342	CG42342	0.399144	0.0961458	0.434	0.427	1
FBgn0284243	CG9277	betaTub56D	0.405296	0.0624369	0.507	0.497	1
FBgn0039584	CG14064	beat-VI	0.405856	0.00583055	0.236	0.234	1
FBgn0038084	CG14390	beat-Vc	0.408064	0.0348196	0.162	0.142	1
FBgn0259821	CG42402	CG42402	0.409297	0.120842	0.343	0.297	1
FBgn0027339	CG11352	jim	0.412564	1.99232	0.986	0.981	1
FBgn0031632	CG15628	CG15628	0.412722	0.184669	0.66	0.676	1
FBgn0262508	CG43078	CG43078	0.416039	-0.0105119	0.132	0.142	1
FBgn0035041	CG13594	CG13594	0.418327	0.0310114	0.127	0.11	1
FBgn0264006	CG43749	dysc	0.425113	0.337564	0.768	0.763	1
FBgn0262782	CG5362	Mdh1	0.426425	0.00976609	0.191	0.186	1
FBgn0044328	CG32052	CG32052	0.427003	0.00178373	0.168	0.159	1
FBgn0031897	CG13784	CG13784	0.427552	0.0576517	0.277	0.252	1
FBgn0033544	CG7220	CG7220	0.429151	-9.8442e-05	0.222	0.222	1
FBgn0053543	CG33543	CG33543	0.430844	0.196678	0.353	0.319	1
FBgn0266851	CR45312	lncRNA:CR45312	0.435472	-0.00610234	0.121	0.114	1
FBgn0035173	CG13907	CG13907	0.438017	0.0302345	0.124	0.105	1
FBgn0263289	CG43398	scrib	0.439899	-0.00393126	0.183	0.188	1
FBgn0036844	CG14080	Mkp3	0.443568	0.182994	0.485	0.433	1
FBgn0265487	CG33197	mbl	0.446051	0.841436	0.716	0.71	1
FBgn0032629	CG15138	beat-IIIc	0.456984	0.266895	0.427	0.399	1
FBgn0003429	CG10693	slo	0.467321	0.393056	0.694	0.666	1
FBgn0086778	CG32538	nAChRalpha7	0.490029	0.389659	0.627	0.572	1
FBgn0000535	CG10952	eag	0.49043	0.0929528	0.388	0.345	1
FBgn0053179	CG33179	beat-IIIb	0.493535	0.0464411	0.364	0.346	1
FBgn0000659	CG10002	fkh	0.497737	0.175889	0.27	0.255	1
FBgn0020907	CG14904	Scp2	0.497768	0.0490423	0.176	0.16	1
FBgn0000575	CG1007	emc	0.498235	0.0838052	0.445	0.406	1
FBgn0270928	CG32848	VAChT	0.49852	0.142158	0.695	0.718	1
FBgn0038653	CG18208	Octalpha2R	0.500264	0.0337838	0.262	0.257	1
FBgn0261113	CG17836	Xrp1	0.50032	0.021776	0.173	0.171	1
FBgn0039380	CG5890	CG5890	0.500872	0.00911766	0.239	0.24	1
FBgn0052017	CG32017	CG32017	0.502781	0.087133	0.317	0.288	1
FBgn0037874	CG4800	Tctp	0.505421	0.00579952	0.348	0.353	1
FBgn0004244	CG10537	Rdl	0.506079	0.721537	0.949	0.953	1
FBgn0083950	CG34114	side-VI	0.513838	0.312329	0.512	0.441	1
FBgn0264975	CG1634	Nrg	0.523847	0.0638835	0.255	0.238	1
FBgn0085432	CG34403	pan	0.527443	0.446598	0.708	0.629	1
FBgn0267336	CG34360	Glut4EF	0.528536	0.669769	0.786	0.738	1
FBgn0030412	CG17762	Tomosyn	0.530785	0.229541	0.566	0.501	1
FBgn0010452	CG11280	trn	0.538415	0.0966594	0.175	0.151	1
FBgn0005636	CG3385	nvy	0.540352	-0.00297359	0.127	0.128	1
FBgn0033108	CG15236	CG15236	0.542996	0.0519196	0.188	0.165	1
FBgn0050158	CG30158	CG30158	0.545943	-0.00798772	0.104	0.111	1
FBgn0261836	CG42768	Msp300	0.552214	0.90742	0.837	0.781	1
FBgn0000037	CG4356	mAChR-A	0.559879	0.071668	0.402	0.382	1
FBgn0038839	CG10830	Ktl	0.5627	0.0181711	0.227	0.214	1
FBgn0035032	CG4692	ATPsynF	0.564826	-0.164666	0.848	0.885	1
FBgn0010473	CG15427	tutl	0.567333	0.422162	0.718	0.692	1
FBgn0051665	CG31665	wry	0.56893	0.316385	0.514	0.447	1
FBgn0023534	CG17778	CG17778	0.577017	0.0356478	0.208	0.189	1
FBgn0085400	CG34371	side-V	0.577451	0.0315956	0.209	0.193	1
FBgn0086677	CG30040	jeb	0.578638	0.28681	0.455	0.392	1
FBgn0250910	CG42244	Octbeta3R	0.583129	0.0236357	0.18	0.166	1
FBgn0285952	CG3186	eEF5	0.587046	0.035407	0.294	0.282	1
FBgn0004449	CG5723	Ten-m	0.600096	0.108616	0.43	0.407	1
FBgn0085414	CG34385	dpr12	0.604522	0.0263835	0.325	0.319	1
FBgn0000036	CG5610	nAChRalpha1	0.604806	0.154076	0.463	0.428	1
FBgn0285944	CG9907	para	0.605208	1.21053	0.904	0.88	1
FBgn0052406	CG32406	PVRAP	0.605922	0.0326153	0.151	0.137	1
FBgn0265182	CG44247	CG44247	0.608865	0.0238936	0.168	0.15	1
FBgn0040726	CG13439	dpr1	0.612787	0.114587	0.342	0.309	1
FBgn0085407	CG34378	Pvf3	0.617749	0.256902	0.455	0.398	1
FBgn0013733	CG18076	shot	0.61876	0.10099	0.322	0.283	1
FBgn0027598	CG31012	cindr	0.620897	0.426369	0.633	0.548	1
FBgn0000042	CG4027	Act5C	0.620927	0.0955541	0.613	0.652	1
FBgn0034286	CG33996	dpr13	0.625749	0.215377	0.404	0.36	1
FBgn0265296	CG42256	Dscam2	0.627893	0.386489	0.756	0.747	1
FBgn0264087	CG43756	Slob	0.628178	0.0254141	0.233	0.227	1
FBgn0266801	CG45263	CG45263	0.629974	0.0304346	0.478	0.469	1
FBgn0266871	CR45332	lncRNA:CR45332	0.631243	-0.00332777	0.167	0.175	1
FBgn0032901	CG9339	sky	0.643257	0.0726663	0.412	0.379	1
FBgn0033192	CG2105	Corin	0.646266	0.0690582	0.27	0.237	1
FBgn0004514	CG7485	Oct-TyrR	0.652958	0.0125599	0.12	0.109	1
FBgn0037521	CG2993	CG2993	0.654451	0.0885422	0.388	0.352	1
FBgn0040823	CG14162	dpr6	0.657003	0.0666132	0.315	0.29	1
FBgn0261556	CG42674	CG42674	0.66214	0.063279	0.305	0.298	1
FBgn0030174	CG15312	CG15312	0.673623	0.0404533	0.233	0.211	1
FBgn0261244	CG33174	inaE	0.674227	0.193961	0.524	0.476	1
FBgn0267668	CR46006	lncRNA:CR46006	0.6746	0.0362588	0.13	0.11	1
FBgn0265598	CG44425	Bx	0.676786	0.0738251	0.186	0.164	1
FBgn0260657	CG42540	CG42540	0.686964	0.216014	0.626	0.6	1
FBgn0017590	CG6669	klg	0.688513	0.114719	0.485	0.483	1
FBgn0033358	CG8216	spab	0.692559	-0.0141928	0.132	0.13	1
FBgn0264574	CG43946	Glut1	0.693023	0.098533	0.381	0.343	1
FBgn0011656	CG1429	Mef2	0.697147	0.0620838	0.238	0.206	1
FBgn0039617	CG14521	DIP-gamma	0.697737	0.00305063	0.136	0.133	1
FBgn0041707	CG1168	7B2	0.698424	0.0101674	0.639	0.661	1
FBgn0038087	CG10134	beat-Va	0.704318	0.00508582	0.186	0.188	1
FBgn0035816	CG13685	CG13685	0.705124	0.00848314	0.153	0.15	1
FBgn0051221	CG31221	CG31221	0.708376	2.41487	0.833	0.784	1
FBgn0031835	CG11319	CG11319	0.713853	0.0707659	0.332	0.312	1
FBgn0031424	CG9887	VGlut	0.714436	0.107749	0.161	0.13	1
FBgn0285948	CG15442	RpL27A	0.71721	0.000807867	0.729	0.773	1
FBgn0034978	CG3257	CG3257	0.728192	-0.000545711	0.153	0.153	1
FBgn0035499	CG14996	Chd64	0.72824	0.0211436	0.118	0.104	1
FBgn0085380	CG34351	CG34351	0.734338	0.0200362	0.127	0.117	1
FBgn0259242	CG42340	CG42340	0.735324	0.0356125	0.22	0.209	1
FBgn0010412	CG4464	RpS19a	0.737586	0.0356307	0.313	0.297	1
FBgn0266418	CG45058	wake	0.748639	0.0112919	0.148	0.152	1
FBgn0263980	CG43729	Stacl	0.751459	0.099343	0.548	0.534	1
FBgn0267253	CG32700	CG32700	0.751854	0.066014	0.217	0.186	1
FBgn0013686	CR34094	mt:lrRNA	0.759762	3.24418	0.89	0.771	1
FBgn0034731	CG10384	CG10384	0.76336	0.0154436	0.159	0.147	1
FBgn0261089	CG5559	Sytalpha	0.764607	0.00744842	0.141	0.143	1
FBgn0033791	CG3915	Drl-2	0.765306	0.0393287	0.168	0.15	1
FBgn0086359	CG3953	Invadolysin	0.76943	0.0242863	0.138	0.13	1
FBgn0005771	CG4491	noc	0.772789	0.0129526	0.121	0.11	1
FBgn0033268	CG2297	Obp44a	0.77439	0.119625	0.193	0.175	1
FBgn0024841	CG1963	Pcd	0.775753	0.00954032	0.113	0.112	1
FBgn0028875	CG32975	nAChRalpha5	0.777064	0.656633	0.777	0.731	1
FBgn0019643	CG3318	AANAT1	0.786564	-0.0133656	0.185	0.195	1
FBgn0033484	CG2269	CG2269	0.787266	0.0991237	0.431	0.435	1
FBgn0001233	CG1242	Hsp83	0.791655	-0.0168668	0.664	0.682	1
FBgn0039419	CG12290	CG12290	0.794084	0.011018	0.104	0.096	1
FBgn0262018	CG42829	CadN2	0.805635	0.00822419	0.139	0.141	1
FBgn0000273	CG4379	Pka-C1	0.8058	0.286441	0.581	0.519	1
FBgn0052600	CG32600	dpr8	0.806226	0.155901	0.389	0.338	1
FBgn0038282	CG33485	dpr9	0.807146	0.264159	0.448	0.395	1
FBgn0036165	CG7533	chrb	0.81099	0.382861	0.664	0.61	1
FBgn0013981	CG3379	His4r	0.81106	0.285193	0.938	0.942	1
FBgn0004611	CG4574	Plc21C	0.815943	0.115337	0.424	0.372	1
FBgn0038237	CG8279	Pde6	0.826898	0.316591	0.581	0.522	1
FBgn0053147	CG33147	Hs3st-A	0.829408	0.456752	0.791	0.763	1
FBgn0052647	CG32647	CG32647	0.830163	0.0489032	0.343	0.331	1
FBgn0001235	CG17117	hth	0.830873	0.545048	0.591	0.522	1
FBgn0259108	CG34387	futsch	0.83748	1.56171	0.961	0.956	1
FBgn0034725	CG6044	CG6044	0.837586	-0.0453336	0.449	0.469	1
FBgn0000116	CG32031	Argk	0.853475	0.162741	0.783	0.803	1
FBgn0028644	CG4838	beat-Ic	0.858299	0.239388	0.324	0.246	1
FBgn0033250	CG14762	CG14762	0.861142	0.0856071	0.443	0.419	1
FBgn0031414	CG33955	eys	0.863924	0.168016	0.427	0.399	1
FBgn0264908	CG44099	pHCl-1	0.870958	0.0982484	0.356	0.321	1
FBgn0250908	CG42242	beat-VII	0.880657	0.0494564	0.19	0.162	1
FBgn0001224	CG4463	Hsp23	0.88168	-0.0112128	0.101	0.1	1
FBgn0039816	CG11317	CG11317	0.884996	0.0136342	0.164	0.158	1
FBgn0010415	CG10497	Sdc	0.898236	0.126197	0.622	0.614	1
FBgn0262738	CG3620	norpA	0.899777	0.0301275	0.504	0.523	1
FBgn0013433	CG4846	beat-Ia	0.900402	0.00550526	0.171	0.166	1
FBgn0036043	CG8177	CG8177	0.930439	0.0538606	0.307	0.289	1
FBgn0037171	CG14459	CG14459	0.930872	0.0392784	0.26	0.252	1
FBgn0086758	CG31666	chinmo	0.932847	0.333627	0.788	0.766	1
FBgn0264000	CG43743	GluRIB	0.948186	0.21877	0.361	0.303	1
FBgn0263220	CG43388	Hk	0.957212	0.470473	0.791	0.765	1
FBgn0053143	CG33143	CG33143	0.960017	0.0117692	0.278	0.273	1
FBgn0243486	CG15151	rdo	0.965504	-0.00388525	0.114	0.114	1
FBgn0261999	CG42817	Ca-Ma2d	0.969288	0.0208644	0.164	0.162	1
FBgn0003435	CG9218	sm	0.972773	0.918802	0.878	0.871	1
FBgn0002593	CG4087	RpLP1	0.974681	-0.0793197	0.725	0.768	1
FBgn0038063	CG33976	Octbeta2R	0.974943	0.202177	0.39	0.313	1
FBgn0052062	CG32062	Rbfox1	0.976316	0.931967	0.877	0.852	1
FBgn0262869	CG43224	Gfrl	0.982957	0.159349	0.549	0.533	1
FBgn0011666	CG5099	msi	0.987085	0.523754	0.53	0.4	1
FBgn0010411	CG8900	RpS18	0.988726	-0.232477	0.848	0.899	1

## Sheet: Global_C8
FlyBaseID	GeneID	Gene symbol	p_val	avg_diff	pct.1	pct.2	p_val_adj
FBgn0019660	CR32665	lncRNA:roX2	0	-3.62709	0.009	0.922	0
FBgn0004652	CG14307	fru	5.95817e-33	0.332866	0.254	0.092	8.93726e-30
FBgn0002940	CG4550	ninaE	1.22671e-30	-0.307841	0.088	0.215	1.84007e-27
FBgn0011693	CG4899	Pdh	9.28811e-29	-0.132006	0.027	0.108	1.39322e-25
FBgn0052683	CG32683	CG32683	4.77462e-27	0.103019	0.206	0.14	7.16193e-24
FBgn0002868	CG9470	MtnA	1.46562e-24	0.263644	0.338	0.196	2.19842e-21
FBgn0052982	CG32982	CG32982	3.3149e-21	0.136787	0.181	0.099	4.97235e-18
FBgn0004619	CG8442	GluRIA	1.65575e-20	0.174919	0.177	0.084	2.48362e-17
FBgn0058469	CR40469	lncRNA:CR40469	5.45325e-20	0.0983651	0.132	0.064	8.17987e-17
FBgn0029768	CG16752	SPR	1.80045e-19	0.159193	0.271	0.182	2.70067e-16
FBgn0033987	CG12424	ckn	1.80277e-18	0.144858	0.212	0.121	2.70415e-15
FBgn0029824	CG3726	CG3726	2.63377e-17	0.158584	0.307	0.212	3.95066e-14
FBgn0265595	CG44422	CG44422	3.10824e-17	0.515426	0.414	0.262	4.66235e-14
FBgn0283499	CG18402	InR	3.42538e-17	0.121002	0.221	0.142	5.13807e-14
FBgn0087002	CG11064	apolpp	1.55509e-16	0.0482687	0.111	0.062	2.33264e-13
FBgn0261988	CG17998	Gprk2	2.75108e-16	0.275521	0.434	0.311	4.12662e-13
FBgn0261260	CG42611	mgl	3.60859e-16	0.0946582	0.146	0.079	5.41288e-13
FBgn0002543	CG5481	robo2	2.52339e-15	0.0765815	0.118	0.067	3.78508e-12
FBgn0003301	CG9533	rut	3.32612e-15	0.0659668	0.147	0.101	4.98917e-12
FBgn0015229	CG6575	glec	1.06732e-14	0.443929	0.44	0.29	1.60099e-11
FBgn0051324	CG31324	CG31324	1.50129e-14	0.190452	0.31	0.212	2.25193e-11
FBgn0004395	CG4620	unk	2.7996e-14	0.163272	0.258	0.17	4.1994e-11
FBgn0065099	CR33925	snRNA:7SK	2.8071e-14	2.34812	0.766	0.721	4.21065e-11
FBgn0083228	CG5907	Frq2	2.82468e-14	0.185128	0.262	0.186	4.23701e-11
FBgn0052057	CG32057	dpr10	4.24264e-14	0.15508	0.211	0.13	6.36397e-11
FBgn0000121	CG5962	Arr2	4.89387e-14	-0.152406	0.083	0.151	7.3408e-11
FBgn0015777	CG9261	nrv2	1.01992e-13	0.112356	0.176	0.104	1.52988e-10
FBgn0260971	CG42594	CG42594	1.02715e-13	0.165347	0.211	0.132	1.54072e-10
FBgn0052521	CG32521	CG32521	1.06158e-13	0.0389413	0.118	0.089	1.59237e-10
FBgn0259170	CG42275	alpha-Man-Ia	2.70656e-13	0.208584	0.358	0.269	4.05984e-10
FBgn0264753	CG44011	Rgk1	4.60251e-13	0.0846527	0.141	0.083	6.90377e-10
FBgn0039209	CG13624	REPTOR	9.67323e-13	0.190858	0.323	0.223	1.45098e-09
FBgn0028369	CG3653	kirre	2.67165e-12	0.303597	0.408	0.295	4.00748e-09
FBgn0040532	CG8369	CG8369	9.43508e-12	0.0837647	0.203	0.15	1.41526e-08
FBgn0031738	CG9171	CG9171	1.5193e-11	0.0914332	0.189	0.123	2.27895e-08
FBgn0264308	CG43778	CG43778	2.80519e-11	0.0406416	0.179	0.138	4.20778e-08
FBgn0038665	CG12269	euc	3.14774e-11	0.0574448	0.11	0.074	4.72161e-08
FBgn0038246	CG14853	CG14853	4.04319e-11	0.0548427	0.189	0.144	6.06478e-08
FBgn0267668	CR46006	lncRNA:CR46006	4.49302e-11	0.226716	0.357	0.25	6.73953e-08
FBgn0032629	CG15138	beat-IIIc	5.42357e-11	0.259988	0.365	0.266	8.13536e-08
FBgn0051163	CG31163	SKIP	6.87826e-11	0.11099	0.158	0.092	1.03174e-07
FBgn0013995	CG5685	Calx	1.31062e-10	0.437571	0.423	0.313	1.96593e-07
FBgn0042696	CG2380	NfI	1.71793e-10	0.122947	0.251	0.185	2.5769e-07
FBgn0029663	CG10804	CG10804	2.31639e-10	0.0738659	0.153	0.099	3.47459e-07
FBgn0031306	CG4577	CG4577	3.18901e-10	0.0607524	0.197	0.155	4.78352e-07
FBgn0028644	CG4838	beat-Ic	3.38453e-10	1.3663	0.595	0.49	5.07679e-07
FBgn0085426	CG34397	Rgk3	3.87594e-10	0.0617815	0.118	0.081	5.81391e-07
FBgn0033403	CG13739	CG13739	4.30354e-10	0.144672	0.129	0.049	6.45531e-07
FBgn0002945	CG11614	nkd	5.42968e-10	0.261819	0.345	0.246	8.14452e-07
FBgn0259677	CG42346	CG42346	5.52497e-10	0.0534935	0.137	0.099	8.28746e-07
FBgn0267910	CR34335	lncRNA:CR34335	6.22075e-10	7.72467	0.995	0.965	9.33113e-07
FBgn0052066	CG32066	CG32066	6.79378e-10	0.0534006	0.157	0.12	1.01907e-06
FBgn0030158	CG9686	CG9686	7.13971e-10	0.0436463	0.112	0.074	1.07096e-06
FBgn0019662	CG8593	qm	8.42922e-10	0.0547739	0.159	0.117	1.26438e-06
FBgn0260753	CG13758	Pdfr	1.44968e-09	0.0650995	0.149	0.11	2.17452e-06
FBgn0030258	CG1552	CG1552	1.66319e-09	0.0832106	0.102	0.051	2.49479e-06
FBgn0265052	CG44167	St3	1.92302e-09	0.0825291	0.243	0.186	2.88453e-06
FBgn0001085	CG17697	fz	2.40731e-09	0.0311489	0.212	0.18	3.61096e-06
FBgn0024321	CG8524	NK7.1	2.45019e-09	0.12557	0.225	0.148	3.67529e-06
FBgn0052206	CG32206	CG32206	2.58975e-09	0.123236	0.28	0.207	3.88462e-06
FBgn0261953	CG7807	TfAP-2	2.85504e-09	0.0734976	0.154	0.109	4.28255e-06
FBgn0250867	CG42238	CG42238	3.11488e-09	0.0938012	0.245	0.196	4.67232e-06
FBgn0085399	CG34370	CG34370	4.04242e-09	0.0670235	0.141	0.09	6.06363e-06
FBgn0022382	CG15862	Pka-R2	5.20263e-09	0.107555	0.3	0.226	7.80394e-06
FBgn0262160	CG9932	CG9932	5.40707e-09	0.214669	0.312	0.219	8.1106e-06
FBgn0051092	CG31092	LpR2	7.39758e-09	0.0695601	0.168	0.123	1.10964e-05
FBgn0035050	CG4871	SiaT	8.71366e-09	0.0347904	0.219	0.204	1.30705e-05
FBgn0011656	CG1429	Mef2	9.80546e-09	0.105586	0.253	0.193	1.47082e-05
FBgn0020269	CG10145	mspo	1.10457e-08	0.111881	0.25	0.196	1.65686e-05
FBgn0261285	CG5629	Ppcs	1.35843e-08	0.0748916	0.123	0.067	2.03765e-05
FBgn0086778	CG32538	nAChRalpha7	1.65843e-08	0.762539	0.482	0.418	2.48764e-05
FBgn0263994	CG43737	CG43737	1.95243e-08	0.244772	0.361	0.255	2.92864e-05
FBgn0037015	CG13253	cmpy	2.57512e-08	0.0742893	0.135	0.082	3.86268e-05
FBgn0004852	CG7978	Ac76E	3.27484e-08	0.0155641	0.105	0.089	4.91226e-05
FBgn0266100	CG44837	CG44837	3.90644e-08	0.0806774	0.152	0.094	5.85966e-05
FBgn0085413	CG34384	CG34384	9.71837e-08	0.111613	0.304	0.238	0.000145776
FBgn0038542	CG7431	TyrR	9.80919e-08	0.071701	0.179	0.127	0.000147138
FBgn0261262	CG42613	CG42613	1.19609e-07	0.374303	0.362	0.219	0.000179413
FBgn0011818	CG9884	oaf	1.25863e-07	0.0422283	0.129	0.097	0.000188795
FBgn0037153	CG12673	olf413	1.31437e-07	0.0594617	0.169	0.124	0.000197156
FBgn0087012	CG1056	5-HT2A	1.55836e-07	0.0786088	0.159	0.111	0.000233754
FBgn0267322	CR45758	lncRNA:CR45758	2.1155e-07	0.0976733	0.19	0.137	0.000317324
FBgn0010300	CG10719	brat	2.47252e-07	0.133926	0.258	0.201	0.000370879
FBgn0003997	CG5123	hid	2.5265e-07	0.0584463	0.116	0.083	0.000378974
FBgn0031299	CG4629	CG4629	2.86653e-07	0.0773043	0.123	0.077	0.000429979
FBgn0040765	CG33473	luna	2.97154e-07	0.143041	0.236	0.168	0.000445732
FBgn0051690	CG31690	CG31690	3.59497e-07	0.124551	0.148	0.091	0.000539246
FBgn0013733	CG18076	shot	4.89842e-07	0.0741034	0.262	0.214	0.000734763
FBgn0031897	CG13784	CG13784	5.01876e-07	0.0435155	0.242	0.193	0.000752814
FBgn0262473	CG5490	Tl	5.08833e-07	0.145932	0.284	0.217	0.00076325
FBgn0011666	CG5099	msi	7.27215e-07	0.801673	0.649	0.443	0.00109082
FBgn0262738	CG3620	norpA	7.82359e-07	-0.0888036	0.333	0.379	0.00117354
FBgn0023179	CG6438	amon	9.34019e-07	0.0982997	0.279	0.214	0.00140103
FBgn0085753	CR40596	28SrRNA-Psi:CR40596	1.02089e-06	0.0701315	0.13	0.082	0.00153133
FBgn0085382	CG34353	CG34353	1.27472e-06	0.11542	0.222	0.154	0.00191208
FBgn0052204	CG32204	CG32204	1.65995e-06	0.0805328	0.155	0.102	0.00248993
FBgn0036801	CG6896	MYPT-75D	1.82807e-06	0.0571281	0.105	0.063	0.00274211
FBgn0086604	CG12484	side-VIII	2.15139e-06	0.059682	0.111	0.07	0.00322708
FBgn0085400	CG34371	side-V	2.32997e-06	0.0802575	0.155	0.104	0.00349495
FBgn0038321	CG6218	CG6218	2.38764e-06	0.0236525	0.104	0.08	0.00358147
FBgn0250869	CG42240	CG42240	2.45326e-06	0.033424	0.111	0.083	0.00367989
FBgn0050361	CG30361	mtt	2.49003e-06	0.0729848	0.151	0.112	0.00373504
FBgn0003285	CG4125	rst	2.68112e-06	0.0650788	0.105	0.063	0.00402168
FBgn0035756	CG32381	unc-13-4A	2.849e-06	0.0414607	0.145	0.114	0.0042735
FBgn0027356	CG8604	Amph	3.27168e-06	0.0525917	0.138	0.098	0.00490751
FBgn0260941	CG42318	app	3.58733e-06	0.0403972	0.131	0.101	0.00538099
FBgn0066101	CG31094	LpR1	3.82013e-06	0.0601329	0.241	0.206	0.0057302
FBgn0039054	CG13830	Cow	4.0378e-06	0.0380326	0.487	0.447	0.0060567
FBgn0000547	CG12676	ed	4.15522e-06	0.0861568	0.136	0.09	0.00623284
FBgn0266429	CG2872	AstA-R1	5.13826e-06	0.0380395	0.102	0.078	0.00770739
FBgn0264000	CG43743	GluRIB	5.2066e-06	0.179311	0.258	0.18	0.0078099
FBgn0015399	CG12283	kek1	6.33803e-06	0.411658	0.532	0.413	0.00950705
FBgn0036144	CG6207	GlcAT-P	6.46097e-06	-0.0116507	0.152	0.159	0.00969146
FBgn0032666	CG5758	CG5758	8.56196e-06	0.0268397	0.114	0.092	0.0128429
FBgn0263706	CG43658	CG43658	8.59483e-06	0.027652	0.24	0.23	0.0128922
FBgn0250910	CG42244	Octbeta3R	8.75257e-06	0.0435568	0.12	0.086	0.0131289
FBgn0000028	CG9151	acj6	9.05142e-06	0.716669	0.534	0.488	0.0135771
FBgn0027598	CG31012	cindr	1.07769e-05	0.321973	0.438	0.327	0.0161654
FBgn0261113	CG17836	Xrp1	1.22066e-05	0.0541302	0.155	0.111	0.0183099
FBgn0033196	CG1358	CG1358	1.27395e-05	0.0507572	0.197	0.158	0.0191092
FBgn0030272	CG15201	CG15201	1.36431e-05	0.0962621	0.168	0.118	0.0204646
FBgn0003091	CG6622	Pkc53E	1.6316e-05	0.291946	0.347	0.239	0.0244739
FBgn0052600	CG32600	dpr8	1.65914e-05	0.160611	0.38	0.326	0.0248871
FBgn0051619	CG31619	nolo	1.70093e-05	0.0897811	0.261	0.211	0.0255139
FBgn0031016	CG12199	kek5	1.73312e-05	0.0326909	0.108	0.082	0.0259969
FBgn0004595	CG17228	pros	1.73449e-05	2.09694	0.886	0.839	0.0260173
FBgn0036844	CG14080	Mkp3	1.85343e-05	0.264711	0.395	0.288	0.0278014
FBgn0004198	CG11387	ct	2.43973e-05	2.1026	0.942	0.909	0.036596
FBgn0085391	CG34362	trv	2.53197e-05	1.13304	0.816	0.697	0.0379795
FBgn0004449	CG5723	Ten-m	2.64338e-05	0.0422111	0.149	0.114	0.0396507
FBgn0004244	CG10537	Rdl	3.46964e-05	0.709462	0.964	0.974	0.0520446
FBgn0052406	CG32406	PVRAP	4.13668e-05	0.011871	0.162	0.138	0.0620502
FBgn0039064	CG4467	CG4467	4.31989e-05	0.382519	0.474	0.335	0.0647984
FBgn0036454	CG17839	CG17839	5.01e-05	0.120111	0.295	0.242	0.07515
FBgn0264503	CG43902	CG43902	5.88196e-05	0.264828	0.343	0.264	0.0882295
FBgn0034286	CG33996	dpr13	5.90089e-05	0.209011	0.381	0.303	0.0885133
FBgn0000567	CG32180	Eip74EF	6.87029e-05	0.0308116	0.121	0.096	0.103054
FBgn0267253	CG32700	CG32700	7.08116e-05	0.0680147	0.198	0.156	0.106217
FBgn0002643	CG8118	mam	7.54881e-05	0.0460006	0.142	0.11	0.113232
FBgn0039420	CG6154	CG6154	8.07538e-05	0.0488263	0.159	0.128	0.121131
FBgn0259821	CG42402	CG42402	9.1625e-05	0.101914	0.133	0.077	0.137437
FBgn0052062	CG32062	Rbfox1	9.46011e-05	0.58669	0.877	0.883	0.141902
FBgn0264975	CG1634	Nrg	9.46598e-05	0.0360432	0.146	0.124	0.14199
FBgn0264273	CG33960	Sema2b	9.8197e-05	0.05169	0.103	0.068	0.147296
FBgn0028407	CG8364	Drep3	9.88535e-05	0.034164	0.147	0.125	0.14828
FBgn0000636	CG5803	Fas3	0.000101235	0.155782	0.267	0.204	0.151852
FBgn0263773	CG43690	fok	0.000112965	0.0769016	0.329	0.279	0.169447
FBgn0085395	CG34366	Shawl	0.000119524	0.0240139	0.108	0.083	0.179285
FBgn0085384	CG34355	CG34355	0.000121283	0.0731947	0.108	0.067	0.181924
FBgn0033356	CG8229	CG8229	0.000125103	-0.040762	0.103	0.132	0.187654
FBgn0023534	CG17778	CG17778	0.000135369	0.0483032	0.19	0.156	0.203053
FBgn0038494	CG4135	beat-IIb	0.000143459	0.0812005	0.269	0.233	0.215189
FBgn0019650	CG11186	toy	0.00014418	0.111775	0.159	0.11	0.21627
FBgn0010434	CG11949	cora	0.00014504	0.0273938	0.103	0.081	0.217559
FBgn0286778	CG46385	CG46385	0.000151129	0.144397	0.246	0.183	0.226694
FBgn0053179	CG33179	beat-IIIb	0.000156161	0.0668411	0.259	0.204	0.234241
FBgn0031770	CG13995	CG13995	0.00015634	0.0594273	0.156	0.113	0.23451
FBgn0016797	CG9739	fz2	0.00016379	0.128753	0.214	0.156	0.245685
FBgn0262509	CG43079	nrm	0.00016467	0.151855	0.245	0.185	0.247005
FBgn0263219	CG42330	Dscam4	0.00017878	0.0836924	0.257	0.215	0.26817
FBgn0283451	CG11491	br	0.000214185	0.0862601	0.101	0.059	0.321277
FBgn0262018	CG42829	CadN2	0.000235064	0.0142665	0.136	0.12	0.352597
FBgn0050463	CG30463	Pgant9	0.000236208	0.101945	0.162	0.11	0.354312
FBgn0261928	CG42795	CG42795	0.000238278	0.0847216	0.329	0.282	0.357416
FBgn0051774	CG31774	fred	0.000255533	0.125095	0.221	0.162	0.3833
FBgn0259243	CG42341	Pka-R1	0.000269848	0.0439079	0.198	0.165	0.404772
FBgn0052506	CG32506	CG32506	0.000292934	0.0343395	0.332	0.306	0.439401
FBgn0030723	CG14948	dpr18	0.000293281	0.0406932	0.172	0.137	0.439922
FBgn0037956	CG6959	CG6959	0.000294487	0.0152853	0.114	0.102	0.44173
FBgn0083975	CG34139	Nlg4	0.000337283	0.0277105	0.181	0.16	0.505925
FBgn0085380	CG34351	CG34351	0.000360661	0.0333999	0.14	0.114	0.540991
FBgn0037521	CG2993	CG2993	0.000407927	0.0538239	0.36	0.323	0.611891
FBgn0000659	CG10002	fkh	0.000417694	0.21088	0.297	0.239	0.626542
FBgn0010329	CG1543	Tbh	0.000429869	0.0262924	0.114	0.096	0.644803
FBgn0264574	CG43946	Glut1	0.000449098	0.0618951	0.359	0.327	0.673647
FBgn0263289	CG43398	scrib	0.000471131	-0.00457768	0.155	0.148	0.706696
FBgn0261046	CG31190	Dscam3	0.000497897	0.129511	0.221	0.169	0.746846
FBgn0266801	CG45263	CG45263	0.000513913	0.0765643	0.119	0.074	0.770869
FBgn0261089	CG5559	Sytalpha	0.000549124	0.0366662	0.227	0.211	0.823686
FBgn0052677	CG32677	X11Lbeta	0.000570039	0.0883562	0.341	0.307	0.855058
FBgn0030090	CG12664	fend	0.0006548	0.0431025	0.238	0.199	0.982201
FBgn0260003	CG34157	Dys	0.00066392	0.010422	0.142	0.126	0.995879
FBgn0001186	CG3001	Hex-A	0.000722536	0.556849	0.49	0.343	1
FBgn0267033	CG45477	mamo	0.000758483	0.574578	0.611	0.526	1
FBgn0260793	CG42573	2mit	0.000806054	0.0366524	0.127	0.097	1
FBgn0014859	CG1864	Hr38	0.000837732	0.0831383	0.296	0.248	1
FBgn0029922	CG14431	CG14431	0.000914302	0.0418049	0.138	0.11	1
FBgn0028370	CG4192	kek3	0.000918517	0.0537482	0.178	0.138	1
FBgn0259789	CG12701	zld	0.0009283	0.0713981	0.192	0.156	1
FBgn0052626	CG32626	AMPdeam	0.000960583	0.0322296	0.12	0.093	1
FBgn0036935	CG14186	CG14186	0.000963409	0.0559235	0.14	0.096	1
FBgn0083950	CG34114	side-VI	0.00102206	0.249831	0.482	0.421	1
FBgn0261258	CG6014	rgn	0.00105638	0.00889723	0.255	0.24	1
FBgn0015774	CG10521	NetB	0.00113948	0.106984	0.218	0.187	1
FBgn0019985	CG11144	mGluR	0.00114165	0.0274214	0.126	0.105	1
FBgn0259171	CG42276	Pde9	0.00114404	0.0698389	0.534	0.522	1
FBgn0015609	CG7100	CadN	0.00116737	0.206168	0.377	0.302	1
FBgn0038063	CG33976	Octbeta2R	0.00117446	0.175184	0.395	0.307	1
FBgn0030505	CG11172	NFAT	0.00124063	0.139506	0.311	0.252	1
FBgn0259234	CG42332	Camta	0.00127245	0.0535486	0.197	0.163	1
FBgn0013688	CR34096	mt:srRNA	0.00127491	0.0492703	0.112	0.074	1
FBgn0016061	CG31062	side	0.00137874	0.100977	0.321	0.271	1
FBgn0263257	CG43395	Cngl	0.00137965	1.05271	0.829	0.746	1
FBgn0000037	CG4356	mAChR-A	0.00153004	0.063289	0.241	0.198	1
FBgn0034978	CG3257	CG3257	0.00153714	0.0277552	0.116	0.092	1
FBgn0039380	CG5890	CG5890	0.00158194	0.0492806	0.271	0.23	1
FBgn0261552	CG42670	ps	0.00163278	0.226757	0.92	0.959	1
FBgn0033159	CG17800	Dscam1	0.00164351	0.020128	0.11	0.098	1
FBgn0024732	CG8357	Drep1	0.00171913	0.0305466	0.108	0.083	1
FBgn0261698	CG42732	SLO2	0.00177201	0.0694844	0.375	0.352	1
FBgn0000179	CG3578	bi	0.00213579	0.242211	0.258	0.202	1
FBgn0014163	CG4609	fax	0.00217711	0.403194	0.486	0.343	1
FBgn0000108	CG7727	Appl	0.00221004	0.551194	0.863	0.888	1
FBgn0052183	CG32183	Ccn	0.00225634	0.0300441	0.175	0.151	1
FBgn0036494	CG7250	Toll-6	0.00257278	0.12769	0.225	0.165	1
FBgn0029939	CG9650	CG9650	0.00271825	0.204736	0.233	0.178	1
FBgn0004580	CG6702	Cbp53E	0.0027215	1.3568	0.83	0.767	1
FBgn0265182	CG44247	CG44247	0.00279164	0.0238556	0.137	0.118	1
FBgn0010412	CG4464	RpS19a	0.00285726	0.0577029	0.259	0.217	1
FBgn0264815	CG44007	Pde1c	0.00301152	0.0392614	0.437	0.416	1
FBgn0031374	CG7337	Wdr62	0.00305282	0.237138	0.44	0.365	1
FBgn0264490	CG18389	Eip93F	0.00319492	0.2979	0.335	0.23	1
FBgn0035816	CG13685	CG13685	0.00338561	0.061723	0.203	0.167	1
FBgn0035499	CG14996	Chd64	0.00361185	0.030581	0.123	0.099	1
FBgn0000036	CG5610	nAChRalpha1	0.00394173	0.104536	0.385	0.336	1
FBgn0262593	CG43128	Shab	0.00403551	0.201848	0.428	0.371	1
FBgn0000273	CG4379	Pka-C1	0.00413303	0.1964	0.619	0.539	1
FBgn0261871	CG33507	dpr2	0.00425813	0.0299098	0.102	0.077	1
FBgn0066084	CG30425	RpL41	0.00504336	1.54729	0.85	0.571	1
FBgn0003380	CG12348	Sh	0.00563608	1.12943	0.927	0.935	1
FBgn0266756	CG44012	btsz	0.00568728	0.0261169	0.104	0.081	1
FBgn0003165	CG9755	pum	0.00608537	0.966098	0.764	0.602	1
FBgn0032840	CG13968	sNPF	0.00635531	0.161303	0.213	0.165	1
FBgn0260660	CG42543	Mp	0.00646	0.0507744	0.418	0.391	1
FBgn0028481	CG4341	CG4341	0.00656573	0.0775005	0.147	0.111	1
FBgn0030574	CG9413	sbm	0.00666305	0.0211847	0.103	0.086	1
FBgn0033108	CG15236	CG15236	0.00681077	0.0742652	0.125	0.09	1
FBgn0052432	CG32432	CG32432	0.0068562	0.0604426	0.271	0.231	1
FBgn0030432	CG4404	CG4404	0.00705398	0.0144455	0.143	0.122	1
FBgn0028645	CG7644	beat-Ib	0.00749383	0.295119	0.451	0.395	1
FBgn0263997	CG43740	CG43740	0.00780965	0.0434432	0.158	0.124	1
FBgn0001233	CG1242	Hsp83	0.0086393	-0.0361499	0.475	0.438	1
FBgn0032901	CG9339	sky	0.00882571	0.085644	0.444	0.395	1
FBgn0053143	CG33143	CG33143	0.00923972	-0.00119777	0.377	0.369	1
FBgn0034808	CG9896	CG9896	0.00927974	0.215974	0.387	0.338	1
FBgn0015519	CG2302	nAChRalpha3	0.00928603	0.0309493	0.104	0.086	1
FBgn0039584	CG14064	beat-VI	0.00988846	0.044376	0.173	0.141	1
FBgn0285952	CG3186	eEF5	0.0104264	0.00418875	0.232	0.223	1
FBgn0264908	CG44099	pHCl-1	0.0113623	0.192029	0.422	0.373	1
FBgn0031835	CG11319	CG11319	0.0119475	0.0488332	0.338	0.313	1
FBgn0031424	CG9887	VGlut	0.0127034	0.204457	0.172	0.113	1
FBgn0023095	CG11282	caps	0.0127419	0.022348	0.131	0.118	1
FBgn0259108	CG34387	futsch	0.0131879	0.270548	0.851	0.855	1
FBgn0086677	CG30040	jeb	0.0135976	0.166717	0.368	0.289	1
FBgn0250908	CG42242	beat-VII	0.0137326	0.0374578	0.241	0.219	1
FBgn0085447	CG34418	sif	0.0138633	0.823704	0.63	0.44	1
FBgn0019643	CG3318	AANAT1	0.0141567	0.0302781	0.156	0.13	1
FBgn0085369	CG34340	Drgx	0.0141956	0.0417705	0.12	0.101	1
FBgn0052647	CG32647	CG32647	0.0150141	0.0305948	0.284	0.266	1
FBgn0027589	CG1688	CG1688	0.0153125	0.0225546	0.21	0.196	1
FBgn0085383	CG34354	CG34354	0.0155047	0.153173	0.337	0.288	1
FBgn0287186	CG17594	scro	0.0155861	0.203783	0.507	0.457	1
FBgn0024189	CG33141	sns	0.0158098	0.00276382	0.114	0.116	1
FBgn0261999	CG42817	Ca-Ma2d	0.0160618	-0.0252874	0.115	0.125	1
FBgn0053543	CG33543	CG33543	0.0168113	0.0741344	0.251	0.213	1
FBgn0003274	CG4918	RpLP2	0.0170312	0.0622255	0.507	0.465	1
FBgn0010263	CG3151	Rbp9	0.0174097	0.228602	0.395	0.314	1
FBgn0010113	CG15532	hdc	0.0178442	0.393189	0.375	0.236	1
FBgn0037676	CG8861	CG8861	0.0181402	0.0603015	0.276	0.25	1
FBgn0033250	CG14762	CG14762	0.018214	0.0732429	0.425	0.386	1
FBgn0010452	CG11280	trn	0.01843	0.02516	0.126	0.116	1
FBgn0085412	CG34383	kmr	0.0192904	0.0706306	0.195	0.162	1
FBgn0040571	CG17193	CG17193	0.0194632	-0.00965788	0.108	0.109	1
FBgn0004858	CG4220	elB	0.0201556	0.0241413	0.115	0.101	1
FBgn0027339	CG11352	jim	0.0207332	2.47922	0.988	0.992	1
FBgn0013686	CR34094	mt:lrRNA	0.0207595	5.80736	0.935	0.758	1
FBgn0000535	CG10952	eag	0.0214292	0.102805	0.359	0.337	1
FBgn0032797	CG10186	Hasp	0.0218873	0.120823	0.67	0.708	1
FBgn0000116	CG32031	Argk	0.0219803	0.0702864	0.616	0.649	1
FBgn0000097	CG3166	aop	0.0222051	0.0815309	0.308	0.278	1
FBgn0085432	CG34403	pan	0.0242069	0.959555	0.778	0.694	1
FBgn0267336	CG34360	Glut4EF	0.0245576	1.17449	0.906	0.887	1
FBgn0261836	CG42768	Msp300	0.0252682	0.351074	0.654	0.588	1
FBgn0000422	CG10697	Ddc	0.026916	0.0554072	0.184	0.149	1
FBgn0053202	CG33202	dpr11	0.0277667	-0.00504578	0.11	0.107	1
FBgn0000575	CG1007	emc	0.0278357	0.0893853	0.464	0.427	1
FBgn0036043	CG8177	CG8177	0.0284864	0.0552213	0.221	0.186	1
FBgn0085397	CG34368	Fili	0.0286913	0.0667137	0.157	0.135	1
FBgn0051665	CG31665	wry	0.0297955	0.234171	0.353	0.274	1
FBgn0004369	CG11516	Ptp99A	0.0303471	0.694748	0.636	0.523	1
FBgn0001078	CG4059	ftz-f1	0.030809	0.245853	0.449	0.386	1
FBgn0265002	CG44153	CG44153	0.0321143	0.0201521	0.198	0.179	1
FBgn0267001	CG42338	Ten-a	0.032212	1.60094	0.875	0.782	1
FBgn0026160	CG7958	tna	0.0324782	0.311262	0.542	0.468	1
FBgn0085409	CG34380	smal	0.0340657	0.0500379	0.24	0.222	1
FBgn0030174	CG15312	CG15312	0.0342577	0.0264198	0.121	0.106	1
FBgn0284245	CG8280	eEF1alpha1	0.0343841	0.00453294	0.25	0.239	1
FBgn0039938	CG11153	Sox102F	0.0374189	0.031999	0.103	0.08	1
FBgn0262737	CG7437	mub	0.0384596	0.717626	0.818	0.778	1
FBgn0011661	CG10701	Moe	0.0405873	-0.000564466	0.105	0.104	1
FBgn0037976	CG14734	Tk	0.0419969	-0.0858264	0.302	0.322	1
FBgn0036165	CG7533	chrb	0.0427905	0.20688	0.601	0.517	1
FBgn0264442	CG43860	ab	0.0440725	0.0112962	0.124	0.108	1
FBgn0036934	CG7395	sNPF-R	0.0464274	-0.0180147	0.105	0.115	1
FBgn0261549	CG42667	rdgA	0.0481816	0.101518	0.554	0.53	1
FBgn0000042	CG4027	Act5C	0.0500724	0.100864	0.503	0.466	1
FBgn0005775	CG7503	Con	0.0503747	1.39463	0.807	0.729	1
FBgn0039089	CG10152	beat-IV	0.0526429	0.0511668	0.136	0.108	1
FBgn0051361	CG31361	dpr17	0.0553239	0.0371481	0.128	0.103	1
FBgn0270928	CG32848	VAChT	0.0608832	0.150021	0.62	0.596	1
FBgn0038282	CG33485	dpr9	0.0652648	0.215244	0.414	0.349	1
FBgn0038498	CG14334	beat-IIa	0.0681125	0.312914	0.499	0.459	1
FBgn0033405	CG13954	CG13954	0.0684145	0.0731706	0.327	0.307	1
FBgn0001234	CR31400	lncRNA:Hsromega	0.0711015	2.30213	0.979	0.98	1
FBgn0264386	CG15899	Ca-alpha1T	0.0714897	0.54027	0.549	0.403	1
FBgn0263930	CG4974	dally	0.0779745	0.0158429	0.206	0.195	1
FBgn0000635	CG3665	Fas2	0.0783981	0.0905831	0.132	0.088	1
FBgn0085407	CG34378	Pvf3	0.0841228	0.381569	0.553	0.472	1
FBgn0266851	CR45312	lncRNA:CR45312	0.0852659	0.0226303	0.188	0.164	1
FBgn0033544	CG7220	CG7220	0.0881151	0.0132581	0.141	0.121	1
FBgn0053517	CG33517	Dop2R	0.0897763	1.04317	0.978	0.979	1
FBgn0260462	CG12163	CG12163	0.0981019	0.0358918	0.101	0.079	1
FBgn0035041	CG13594	CG13594	0.104839	0.0085255	0.11	0.099	1
FBgn0261574	CG7749	kug	0.110013	0.0287878	0.14	0.125	1
FBgn0010415	CG10497	Sdc	0.110794	0.140308	0.644	0.579	1
FBgn0031294	CG31795	IA-2	0.111991	1.96222	0.977	0.97	1
FBgn0000303	CG12345	ChAT	0.115955	-0.00608178	0.261	0.268	1
FBgn0040823	CG14162	dpr6	0.116499	0.0703345	0.274	0.244	1
FBgn0052264	CG32264	CG32264	0.119641	0.440201	0.689	0.573	1
FBgn0267252	CG3694	Ggamma30A	0.120661	0.545973	0.851	0.861	1
FBgn0000633	CG17716	CG17716	0.122902	0.277118	0.382	0.305	1
FBgn0039647	CG14509	jus	0.127664	0.117333	0.282	0.232	1
FBgn0032833	CG10664	COX4	0.129766	-0.182543	0.654	0.74	1
FBgn0264087	CG43756	Slob	0.131234	0.0227163	0.307	0.293	1
FBgn0263397	CG8585	Ih	0.132062	0.819195	0.829	0.771	1
FBgn0038839	CG10830	Ktl	0.134307	-0.0240449	0.209	0.218	1
FBgn0015400	CG4977	kek2	0.137209	0.0196324	0.244	0.227	1
FBgn0033438	CG1794	Mmp2	0.139569	-0.0729573	0.349	0.376	1
FBgn0030897	CG5744	Frq1	0.14357	1.03442	0.798	0.662	1
FBgn0033268	CG2297	Obp44a	0.147164	0.15094	0.234	0.199	1
FBgn0014184	CG16747	Oda	0.148901	0.16819	0.578	0.511	1
FBgn0083963	CG34127	Nlg3	0.155323	0.201731	0.388	0.283	1
FBgn0013973	CG1470	Gycbeta100B	0.15617	0.00458801	0.121	0.117	1
FBgn0011224	CG31000	heph	0.159017	0.893581	0.769	0.642	1
FBgn0264606	CG43955	Fife	0.161148	0.115974	0.354	0.296	1
FBgn0033484	CG2269	CG2269	0.165505	0.17726	0.593	0.579	1
FBgn0036927	CG7433	Gabat	0.183378	0.00705583	0.184	0.173	1
FBgn0010313	CG2530	corto	0.188383	0.0155848	0.238	0.222	1
FBgn0262614	CG43140	pyd	0.189557	0.114549	0.132	0.11	1
FBgn0004611	CG4574	Plc21C	0.190316	0.0747401	0.304	0.266	1
FBgn0262869	CG43224	Gfrl	0.191709	0.225422	0.632	0.59	1
FBgn0034138	CG8332	RpS15	0.192508	-0.2221	0.823	0.88	1
FBgn0010114	CG2040	hig	0.196309	0.246978	0.515	0.455	1
FBgn0038237	CG8279	Pde6	0.198005	0.215963	0.349	0.268	1
FBgn0083949	CG34113	side-III	0.199548	0.488972	0.701	0.639	1
FBgn0028875	CG32975	nAChRalpha5	0.201386	0.508364	0.512	0.321	1
FBgn0267978	CG8376	ap	0.203848	0.038067	0.207	0.184	1
FBgn0085387	CG34358	shakB	0.204517	0.124995	0.354	0.306	1
FBgn0261244	CG33174	inaE	0.205065	0.10845	0.382	0.347	1
FBgn0260658	CG42541	CG42541	0.210783	-0.302575	0.69	0.696	1
FBgn0003360	CG16944	sesB	0.212403	-0.0834687	0.732	0.823	1
FBgn0032151	CG4128	nAChRalpha6	0.21555	3.12253	0.784	0.715	1
FBgn0263220	CG43388	Hk	0.21784	0.705686	0.795	0.724	1
FBgn0039349	CG4685	Ssadh	0.219447	0.0236422	0.116	0.095	1
FBgn0085414	CG34385	dpr12	0.221465	0.0717216	0.343	0.325	1
FBgn0262741	CR43126	lncRNA:CR43126	0.222118	0.0242858	0.103	0.088	1
FBgn0261788	CG42734	Ank2	0.22351	0.463664	0.7	0.632	1
FBgn0040726	CG13439	dpr1	0.226451	0.178822	0.508	0.476	1
FBgn0085421	CG34392	Epac	0.227947	0.0316239	0.307	0.302	1
FBgn0029761	CG10706	SK	0.236696	0.261809	0.408	0.309	1
FBgn0052017	CG32017	CG32017	0.237224	0.199831	0.375	0.283	1
FBgn0053147	CG33147	Hs3st-A	0.23922	0.40127	0.693	0.604	1
FBgn0261804	CG42750	CG42750	0.239398	0.0898844	0.312	0.269	1
FBgn0037913	CG6783	fabp	0.242086	-0.0339299	0.12	0.127	1
FBgn0037874	CG4800	Tctp	0.250292	-0.0470916	0.399	0.413	1
FBgn0051221	CG31221	CG31221	0.255231	1.88093	0.947	0.911	1
FBgn0261597	CG10305	RpS26	0.263556	-0.204602	0.798	0.867	1
FBgn0027654	CG2239	jdp	0.264619	0.192452	0.44	0.365	1
FBgn0035495	CG14989	CG14989	0.288847	0.428554	0.532	0.432	1
FBgn0085370	CG34341	Pde11	0.289804	0.00811248	0.104	0.099	1
FBgn0020907	CG14904	Scp2	0.290768	-0.0200385	0.112	0.126	1
FBgn0010473	CG15427	tutl	0.290931	0.304406	0.651	0.583	1
FBgn0010411	CG8900	RpS18	0.301343	-0.294583	0.816	0.905	1
FBgn0029814	CG15765	CG15765	0.30381	0.192851	0.508	0.46	1
FBgn0034753	CG2852	CG2852	0.308675	0.0331142	0.268	0.246	1
FBgn0027608	CG2082	CG2082	0.31479	0.0377642	0.408	0.393	1
FBgn0264001	CG43744	bru3	0.337114	0.364411	0.333	0.18	1
FBgn0261588	CG42698	pdm3	0.345753	0.0624699	0.249	0.258	1
FBgn0259242	CG42340	CG42340	0.364242	0.00426103	0.189	0.186	1
FBgn0013467	CG18285	igl	0.366586	0.403225	0.632	0.541	1
FBgn0033192	CG2105	Corin	0.379875	0.0690404	0.338	0.311	1
FBgn0028496	CG30116	CG30116	0.390368	0.0826668	0.247	0.214	1
FBgn0031414	CG33955	eys	0.398478	0.102261	0.247	0.214	1
FBgn0265597	CG44424	rad	0.3996	0.212312	0.276	0.186	1
FBgn0031632	CG15628	CG15628	0.404524	0.0940352	0.427	0.382	1
FBgn0284243	CG9277	betaTub56D	0.411139	-0.00925862	0.297	0.286	1
FBgn0085434	CG34405	NaCP60E	0.431145	0.528499	0.667	0.574	1
FBgn0034731	CG10384	CG10384	0.445747	0.0463103	0.194	0.177	1
FBgn0260657	CG42540	CG42540	0.453602	0.474358	0.755	0.665	1
FBgn0259244	CG42342	CG42342	0.472366	0.0609727	0.185	0.155	1
FBgn0262782	CG5362	Mdh1	0.477107	0.0228196	0.112	0.097	1
FBgn0263995	CG43738	cpo	0.490188	0.588167	0.849	0.837	1
FBgn0032400	CG6770	CG6770	0.498424	0.568077	0.742	0.629	1
FBgn0038826	CG17838	Syp	0.507376	0.276802	0.448	0.329	1
FBgn0001235	CG17117	hth	0.508003	0.187389	0.323	0.244	1
FBgn0261556	CG42674	CG42674	0.511719	0.00184484	0.104	0.104	1
FBgn0031697	CG14024	CG14024	0.512269	0.0214772	0.138	0.127	1
FBgn0041094	CG7590	scyl	0.518606	0.229166	0.474	0.411	1
FBgn0250839	CG2016	CG2016	0.530419	0.0253872	0.121	0.107	1
FBgn0265487	CG33197	mbl	0.554918	0.250902	0.257	0.184	1
FBgn0034725	CG6044	CG6044	0.578802	-0.0258622	0.216	0.219	1
FBgn0263392	CG43444	Tet	0.592404	0.186935	0.712	0.665	1
FBgn0038653	CG18208	Octalpha2R	0.603806	0.136584	0.425	0.407	1
FBgn0029897	CG3203	RpL17	0.648979	-0.0821057	0.62	0.606	1
FBgn0259213	CG42313	side-II	0.659818	0.130746	0.549	0.526	1
FBgn0264895	CG44086	RapGAP1	0.669806	0.235561	0.456	0.387	1
FBgn0260943	CG32169	Rbp6	0.676978	1.07077	0.921	0.908	1
FBgn0041605	CG32490	cpx	0.684005	0.40983	0.973	0.986	1
FBgn0037525	CG17816	CG17816	0.692353	0.175373	0.395	0.298	1
FBgn0000064	CG6058	Ald1	0.704251	-0.00574103	0.494	0.48	1
FBgn0003429	CG10693	slo	0.724889	0.443966	0.627	0.499	1
FBgn0030412	CG17762	Tomosyn	0.737061	0.257163	0.525	0.426	1
FBgn0003423	CG1417	slgA	0.737383	0.16629	0.36	0.26	1
FBgn0002593	CG4087	RpLP1	0.767041	-0.105228	0.748	0.786	1
FBgn0004242	CG3139	Syt1	0.79199	0.581238	0.827	0.873	1
FBgn0285948	CG15442	RpL27A	0.801572	0.0404798	0.756	0.781	1
FBgn0004880	CG1130	scrt	0.804978	0.486563	0.935	0.959	1
FBgn0259216	CG42316	RhoGAP102A	0.80773	0.00705239	0.12	0.116	1
FBgn0265296	CG42256	Dscam2	0.811064	0.471415	0.781	0.736	1
FBgn0013433	CG4846	beat-Ia	0.81466	0.0451263	0.161	0.154	1
FBgn0001091	CG12055	Gapdh1	0.815747	-0.0175948	0.22	0.213	1
FBgn0035032	CG4692	ATPsynF	0.821564	-0.109444	0.653	0.721	1
FBgn0017590	CG6669	klg	0.827281	0.0998073	0.279	0.248	1
FBgn0036773	CG13698	CG13698	0.834216	-0.0068562	0.149	0.155	1
FBgn0036851	CG14082	CG14082	0.835975	0.0255214	0.152	0.143	1
FBgn0013576	CG32464	mtd	0.838987	0.381662	0.596	0.464	1
FBgn0004635	CG1004	rho	0.848669	0.024451	0.118	0.113	1
FBgn0000024	CG17907	Ace	0.852764	0.352268	0.59	0.495	1
FBgn0013981	CG3379	His4r	0.889506	0.304423	0.946	0.949	1
FBgn0041707	CG1168	7B2	0.901941	0.00294624	0.573	0.561	1
FBgn0029123	CG18024	SoxN	0.902956	0.298341	0.448	0.429	1
FBgn0028704	CG18660	Nckx30C	0.914497	0.274004	0.775	0.78	1
FBgn0285944	CG9907	para	0.926055	0.948551	0.856	0.859	1
FBgn0263353	CG11000	CG11000	0.927113	0.176798	0.542	0.496	1
FBgn0039232	CG13636	sosie	0.934834	0.231142	0.51	0.515	1
FBgn0024963	CG7535	GluClalpha	0.936377	0.402175	0.674	0.579	1
FBgn0263980	CG43729	Stacl	0.944756	0.148675	0.71	0.673	1
FBgn0264006	CG43749	dysc	0.954406	0.425742	0.775	0.76	1
FBgn0013954	CG11001	Fkbp12	0.981671	-0.00224066	0.405	0.394	1
FBgn0003435	CG9218	sm	0.985786	0.791488	0.863	0.869	1
FBgn0086758	CG31666	chinmo	0.995798	0.490339	0.705	0.624	1

## Sheet: Global_C9
FlyBaseID	GeneID	Gene symbol	p_val	avg_diff	pct.1	pct.2	p_val_adj
FBgn0019660	CR32665	lncRNA:roX2	2.28776e-288	-2.04835	0.004	0.75	3.43164e-285
FBgn0004047	CG11129	Yp3	6.98477e-75	0.122139	0.106	0.002	1.04772e-71
FBgn0058469	CR40469	lncRNA:CR40469	1.64778e-22	0.0945077	0.164	0.089	2.47167e-19
FBgn0052982	CG32982	CG32982	4.84535e-20	0.136684	0.136	0.041	7.26803e-17
FBgn0087002	CG11064	apolpp	6.19751e-19	0.109405	0.144	0.062	9.29627e-16
FBgn0033987	CG12424	ckn	1.6313e-18	0.063735	0.146	0.092	2.44695e-15
FBgn0036821	CG3961	CG3961	3.85523e-18	0.200692	0.192	0.092	5.78284e-15
FBgn0011693	CG4899	Pdh	1.76657e-17	-0.134887	0.041	0.107	2.64985e-14
FBgn0260429	CG42524	CG42524	1.56893e-16	0.131237	0.194	0.113	2.35339e-13
FBgn0029768	CG16752	SPR	2.20934e-16	0.165639	0.23	0.137	3.31401e-13
FBgn0002940	CG4550	ninaE	4.56627e-15	-0.291014	0.121	0.215	6.84941e-12
FBgn0035495	CG14989	CG14989	5.2105e-15	2.58314	1	1	7.81576e-12
FBgn0283651	CG46301	CG46301	5.05792e-14	0.0985636	0.147	0.071	7.58688e-11
FBgn0004573	CG12073	5-HT7	5.31871e-14	0.0462439	0.122	0.082	7.97807e-11
FBgn0036789	CG13702	AstC-R2	9.8976e-14	0.107013	0.147	0.077	1.48464e-10
FBgn0013995	CG5685	Calx	1.01941e-13	0.301511	0.232	0.126	1.52911e-10
FBgn0250867	CG42238	CG42238	1.2817e-13	0.209126	0.346	0.222	1.92256e-10
FBgn0015766	CG10596	Msr-110	2.2765e-13	0.0736766	0.134	0.072	3.41476e-10
FBgn0264753	CG44011	Rgk1	2.9358e-13	0.121111	0.158	0.075	4.40371e-10
FBgn0003301	CG9533	rut	8.33067e-13	0.119745	0.247	0.155	1.2496e-09
FBgn0004652	CG14307	fru	8.83423e-13	0.313946	0.292	0.119	1.32513e-09
FBgn0052057	CG32057	dpr10	1.13951e-12	0.0906144	0.153	0.092	1.70926e-09
FBgn0051324	CG31324	CG31324	1.4562e-12	0.24061	0.38	0.259	2.18431e-09
FBgn0037963	CG6977	Cad87A	1.66573e-12	0.109032	0.146	0.075	2.4986e-09
FBgn0051690	CG31690	CG31690	2.88654e-12	0.219678	0.309	0.195	4.32981e-09
FBgn0004395	CG4620	unk	3.73624e-12	0.140678	0.219	0.122	5.60436e-09
FBgn0031299	CG4629	CG4629	4.44825e-12	0.079097	0.176	0.116	6.67237e-09
FBgn0259677	CG42346	CG42346	5.73322e-12	0.0960088	0.165	0.096	8.59983e-09
FBgn0030258	CG1552	CG1552	6.99207e-12	0.0785177	0.118	0.062	1.04881e-08
FBgn0020621	CG2049	Pkn	1.72099e-11	0.0643538	0.144	0.092	2.58148e-08
FBgn0261260	CG42611	mgl	2.55561e-11	0.0753791	0.173	0.123	3.83342e-08
FBgn0029663	CG10804	CG10804	1.08626e-10	0.690605	0.697	0.522	1.62938e-07
FBgn0264090	CG43759	CG43759	1.85559e-10	0.0858832	0.12	0.064	2.78339e-07
FBgn0031016	CG12199	kek5	4.19767e-10	0.0806682	0.191	0.121	6.2965e-07
FBgn0085399	CG34370	CG34370	1.17483e-09	0.124626	0.245	0.163	1.76224e-06
FBgn0013718	CG33991	nuf	1.19877e-09	0.0609786	0.129	0.078	1.79816e-06
FBgn0083228	CG5907	Frq2	1.84256e-09	0.175972	0.174	0.079	2.76383e-06
FBgn0052683	CG32683	CG32683	2.14659e-09	0.119135	0.241	0.182	3.21989e-06
FBgn0052521	CG32521	CG32521	2.32152e-09	0.132359	0.261	0.191	3.48227e-06
FBgn0020269	CG10145	mspo	7.14625e-09	0.136626	0.25	0.176	1.07194e-05
FBgn0029824	CG3726	CG3726	7.80244e-09	0.252316	0.392	0.278	1.17037e-05
FBgn0033356	CG8229	CG8229	9.14128e-09	-0.0454211	0.112	0.152	1.37119e-05
FBgn0285963	CG46339	CG46339	1.24306e-08	0.0752257	0.167	0.109	1.86458e-05
FBgn0052626	CG32626	AMPdeam	2.20284e-08	0.0697033	0.231	0.19	3.30427e-05
FBgn0052066	CG32066	CG32066	3.59597e-08	0.0890867	0.189	0.13	5.39396e-05
FBgn0030913	CG6123	CG6123	3.89067e-08	0.162018	0.189	0.115	5.83601e-05
FBgn0260971	CG42594	CG42594	4.29843e-08	0.229256	0.262	0.152	6.44765e-05
FBgn0033368	CG13743	CG13743	4.91258e-08	0.0571601	0.123	0.075	7.36887e-05
FBgn0004619	CG8442	GluRIA	5.26246e-08	0.265067	0.328	0.211	7.89368e-05
FBgn0051814	CG31814	DIP-kappa	5.85791e-08	0.137369	0.11	0.054	8.78687e-05
FBgn0087012	CG1056	5-HT2A	6.42579e-08	0.0954998	0.137	0.082	9.63869e-05
FBgn0004607	CG1449	zfh2	8.45837e-08	0.0618913	0.127	0.085	0.000126876
FBgn0265595	CG44422	CG44422	1.14278e-07	0.280104	0.288	0.17	0.000171417
FBgn0002945	CG11614	nkd	1.20191e-07	0.229079	0.36	0.255	0.000180287
FBgn0025382	CG14791	Rab27	1.22833e-07	-0.00648397	0.088	0.11	0.000184249
FBgn0004449	CG5723	Ten-m	1.56102e-07	0.163408	0.3	0.203	0.000234154
FBgn0262614	CG43140	pyd	2.0569e-07	0.149969	0.211	0.136	0.000308535
FBgn0040532	CG8369	CG8369	2.08305e-07	0.280442	0.242	0.156	0.000312457
FBgn0036725	CG18265	CG18265	2.35645e-07	0.0456732	0.149	0.11	0.000353468
FBgn0264895	CG44086	RapGAP1	2.46099e-07	0.760769	0.641	0.569	0.000369148
FBgn0015777	CG9261	nrv2	2.47525e-07	0.0382986	0.17	0.127	0.000371287
FBgn0019662	CG8593	qm	3.49397e-07	0.107513	0.189	0.129	0.000524096
FBgn0261988	CG17998	Gprk2	3.81128e-07	0.338888	0.432	0.266	0.000571693
FBgn0263773	CG43690	fok	5.05545e-07	0.123567	0.264	0.186	0.000758318
FBgn0030158	CG9686	CG9686	5.12244e-07	0.114338	0.139	0.084	0.000768366
FBgn0000121	CG5962	Arr2	5.71964e-07	-0.068681	0.101	0.151	0.000857946
FBgn0085397	CG34368	Fili	6.37828e-07	0.114193	0.203	0.141	0.000956743
FBgn0051163	CG31163	SKIP	6.88067e-07	0.21521	0.275	0.163	0.0010321
FBgn0050361	CG30361	mtt	7.04383e-07	0.0605574	0.108	0.062	0.00105657
FBgn0031738	CG9171	CG9171	7.44998e-07	0.0501152	0.133	0.097	0.0011175
FBgn0265598	CG44425	Bx	8.42512e-07	0.114767	0.192	0.121	0.00126377
FBgn0053087	CG33087	LRP1	9.57537e-07	0.0555141	0.118	0.08	0.0014363
FBgn0086604	CG12484	side-VIII	1.07425e-06	0.124025	0.209	0.143	0.00161138
FBgn0010452	CG11280	trn	1.08331e-06	0.146269	0.218	0.145	0.00162496
FBgn0038246	CG14853	CG14853	1.11085e-06	0.0733821	0.186	0.117	0.00166627
FBgn0032797	CG10186	Hasp	1.20055e-06	-0.265192	0.904	0.931	0.00180083
FBgn0086359	CG3953	Invadolysin	1.56265e-06	0.0447254	0.114	0.075	0.00234398
FBgn0261588	CG42698	pdm3	1.65748e-06	0.070973	0.103	0.053	0.00248623
FBgn0260442	CG6831	rhea	1.68221e-06	0.0559529	0.144	0.093	0.00252331
FBgn0264000	CG43743	GluRIB	1.86185e-06	0.330552	0.449	0.329	0.00279278
FBgn0033405	CG13954	CG13954	1.87526e-06	0.268481	0.371	0.261	0.00281289
FBgn0039209	CG13624	REPTOR	2.18245e-06	0.0913418	0.277	0.211	0.00327368
FBgn0267322	CR45758	lncRNA:CR45758	2.36985e-06	0.0476221	0.126	0.094	0.00355477
FBgn0050463	CG30463	Pgant9	2.96963e-06	0.0719506	0.215	0.166	0.00445444
FBgn0040726	CG13439	dpr1	3.14763e-06	0.252403	0.349	0.258	0.00472145
FBgn0085753	CR40596	28SrRNA-Psi:CR40596	3.44774e-06	0.0433205	0.142	0.101	0.0051716
FBgn0085413	CG34384	CG34384	3.74748e-06	0.245993	0.433	0.344	0.00562122
FBgn0042696	CG2380	NfI	3.92293e-06	0.136709	0.292	0.211	0.0058844
FBgn0011656	CG1429	Mef2	4.41103e-06	0.0728678	0.24	0.183	0.00661654
FBgn0050115	CG30115	GEFmeso	5.44907e-06	0.115304	0.121	0.083	0.0081736
FBgn0260793	CG42573	2mit	5.47276e-06	0.0544862	0.192	0.139	0.00820913
FBgn0283499	CG18402	InR	6.01597e-06	0.0930327	0.179	0.116	0.00902396
FBgn0000567	CG32180	Eip74EF	6.21067e-06	0.0449184	0.127	0.084	0.00931601
FBgn0004509	CG10772	Fur1	1.10348e-05	0.0321762	0.135	0.1	0.0165522
FBgn0013688	CR34096	mt:srRNA	1.16522e-05	0.074835	0.162	0.107	0.0174783
FBgn0030272	CG15201	CG15201	1.2914e-05	0.190367	0.202	0.135	0.019371
FBgn0260941	CG42318	app	1.47945e-05	0.198504	0.319	0.238	0.0221918
FBgn0261285	CG5629	Ppcs	1.87094e-05	0.0996076	0.183	0.125	0.028064
FBgn0085414	CG34385	dpr12	2.27045e-05	0.055103	0.298	0.242	0.0340568
FBgn0263706	CG43658	CG43658	2.78752e-05	0.0320442	0.158	0.127	0.0418128
FBgn0038494	CG4135	beat-IIb	3.41451e-05	0.0792244	0.15	0.1	0.0512177
FBgn0000489	CG6117	Pka-C3	3.65803e-05	0.129485	0.132	0.08	0.0548704
FBgn0260753	CG13758	Pdfr	3.89477e-05	0.0525556	0.132	0.096	0.0584215
FBgn0040397	CG3655	CG3655	4.00687e-05	0.0498557	0.161	0.119	0.060103
FBgn0038542	CG7431	TyrR	4.02359e-05	0.0590694	0.112	0.072	0.0603538
FBgn0023534	CG17778	CG17778	4.77616e-05	0.0885946	0.238	0.177	0.0716424
FBgn0002868	CG9470	MtnA	4.90928e-05	0.58648	0.367	0.205	0.0736393
FBgn0085385	CG34356	bma	4.91114e-05	0.107815	0.159	0.104	0.0736671
FBgn0038980	CG6919	Octbeta1R	5.91696e-05	0.138618	0.242	0.173	0.0887543
FBgn0035756	CG32381	unc-13-4A	6.15077e-05	0.0517559	0.189	0.152	0.0922615
FBgn0015519	CG2302	nAChRalpha3	7.37863e-05	0.115202	0.242	0.177	0.110679
FBgn0011818	CG9884	oaf	9.35445e-05	0.0245651	0.147	0.13	0.140317
FBgn0285926	CG1691	Imp	9.72181e-05	0.220496	0.168	0.089	0.145827
FBgn0051708	CG31708	DIP-zeta	0.000103296	0.217571	0.179	0.126	0.154945
FBgn0085426	CG34397	Rgk3	0.000104355	0.0676634	0.116	0.079	0.156532
FBgn0011676	CG6713	Nos	0.000112468	0.364572	0.295	0.235	0.168702
FBgn0265296	CG42256	Dscam2	0.000113881	1.09259	0.781	0.702	0.170822
FBgn0065099	CR33925	snRNA:7SK	0.000115569	1.64349	0.811	0.693	0.173354
FBgn0013733	CG18076	shot	0.000152465	0.141878	0.374	0.285	0.228698
FBgn0031971	CG7224	Sirup	0.000168081	0.0893935	0.219	0.158	0.252121
FBgn0262160	CG9932	CG9932	0.000179497	0.194036	0.31	0.212	0.269246
FBgn0038498	CG14334	beat-IIa	0.000179938	0.326822	0.366	0.266	0.269907
FBgn0003326	CG17579	sca	0.000189888	0.0310529	0.112	0.083	0.284832
FBgn0004168	CG16720	5-HT1A	0.000193883	0.127649	0.241	0.178	0.290824
FBgn0015774	CG10521	NetB	0.000196632	0.110304	0.186	0.123	0.294948
FBgn0037015	CG13253	cmpy	0.000249327	0.105422	0.256	0.194	0.373991
FBgn0260003	CG34157	Dys	0.000253037	0.0663944	0.173	0.13	0.379556
FBgn0032629	CG15138	beat-IIIc	0.000253417	0.149517	0.18	0.107	0.380126
FBgn0019985	CG11144	mGluR	0.000274694	0.134496	0.292	0.227	0.412041
FBgn0085409	CG34380	smal	0.000280451	0.0877956	0.235	0.168	0.420676
FBgn0028369	CG3653	kirre	0.000283219	0.185046	0.354	0.274	0.424829
FBgn0032666	CG5758	CG5758	0.000288081	0.182453	0.317	0.23	0.432122
FBgn0027356	CG8604	Amph	0.000303376	0.0267246	0.151	0.129	0.455064
FBgn0010300	CG10719	brat	0.000316998	0.125117	0.296	0.225	0.475497
FBgn0037941	CG12594	CG12594	0.000348993	-0.0269265	0.158	0.153	0.52349
FBgn0000179	CG3578	bi	0.000388929	0.388788	0.325	0.248	0.583394
FBgn0261953	CG7807	TfAP-2	0.000396489	0.0592579	0.141	0.1	0.594733
FBgn0033446	CG1648	CG1648	0.000416034	0.0616983	0.146	0.097	0.624051
FBgn0052698	CG32698	CARPB	0.000443394	0.299728	0.253	0.197	0.665092
FBgn0243512	CG7850	puc	0.000469321	0.0588008	0.193	0.152	0.703982
FBgn0029003	CG4746	mab-21	0.000503873	0.0519177	0.25	0.211	0.75581
FBgn0051361	CG31361	dpr17	0.000507378	0.0969169	0.18	0.128	0.761067
FBgn0261649	CG31247	tinc	0.00061963	0.0396424	0.132	0.103	0.929444
FBgn0261549	CG42667	rdgA	0.000698712	0.187738	0.239	0.155	1
FBgn0261113	CG17836	Xrp1	0.000713818	0.0587657	0.188	0.144	1
FBgn0041629	CG1787	Hexo2	0.000797547	0.0377331	0.129	0.102	1
FBgn0033579	CG13229	CG13229	0.000827681	0.0552157	0.102	0.067	1
FBgn0029123	CG18024	SoxN	0.000828072	0.454344	0.45	0.356	1
FBgn0016797	CG9739	fz2	0.000842403	0.0797372	0.191	0.144	1
FBgn0001085	CG17697	fz	0.000858699	0.0812902	0.25	0.214	1
FBgn0029814	CG15765	CG15765	0.000860113	0.484967	0.483	0.374	1
FBgn0052406	CG32406	PVRAP	0.000905575	0.0327196	0.2	0.172	1
FBgn0037521	CG2993	CG2993	0.00102678	0.140373	0.379	0.297	1
FBgn0259170	CG42275	alpha-Man-Ia	0.00105117	0.0947963	0.24	0.191	1
FBgn0261698	CG42732	SLO2	0.00110568	0.219704	0.356	0.265	1
FBgn0027546	CG4766	CG4766	0.0011128	0.0234723	0.145	0.128	1
FBgn0053639	CG33639	CG33639	0.00123583	0.0431671	0.109	0.082	1
FBgn0033403	CG13739	CG13739	0.00128172	0.724749	0.559	0.448	1
FBgn0051092	CG31092	LpR2	0.00148481	0.055698	0.149	0.114	1
FBgn0040297	CG9256	Nhe2	0.0015269	0.0499175	0.147	0.104	1
FBgn0000422	CG10697	Ddc	0.00162327	0.125867	0.225	0.156	1
FBgn0264975	CG1634	Nrg	0.00163063	0.0894553	0.192	0.132	1
FBgn0036801	CG6896	MYPT-75D	0.00172013	0.136375	0.24	0.177	1
FBgn0039617	CG14521	DIP-gamma	0.00179023	0.019891	0.101	0.074	1
FBgn0085380	CG34351	CG34351	0.00197661	0.012692	0.156	0.142	1
FBgn0264273	CG33960	Sema2b	0.00202369	0.0513178	0.124	0.089	1
FBgn0019650	CG11186	toy	0.00203464	-0.0556984	0.203	0.224	1
FBgn0024189	CG33141	sns	0.00221385	0.0326852	0.155	0.127	1
FBgn0260462	CG12163	CG12163	0.00224261	0.013948	0.111	0.09	1
FBgn0052206	CG32206	CG32206	0.00230149	0.0689745	0.234	0.191	1
FBgn0001078	CG4059	ftz-f1	0.002494	0.158995	0.404	0.326	1
FBgn0024841	CG1963	Pcd	0.00253546	0.0329706	0.146	0.117	1
FBgn0052600	CG32600	dpr8	0.0025787	0.179317	0.376	0.292	1
FBgn0000116	CG32031	Argk	0.00260746	0.10988	0.884	0.892	1
FBgn0003651	CG11502	svp	0.00269404	0.051124	0.179	0.147	1
FBgn0262473	CG5490	Tl	0.00271501	0.101495	0.189	0.149	1
FBgn0024321	CG8524	NK7.1	0.00280955	0.0409946	0.106	0.074	1
FBgn0266756	CG44012	btsz	0.00288282	0.0844387	0.143	0.101	1
FBgn0259243	CG42341	Pka-R1	0.00301775	0.1095	0.244	0.168	1
FBgn0004580	CG6702	Cbp53E	0.00323881	0.926357	0.472	0.293	1
FBgn0052677	CG32677	X11Lbeta	0.0033128	0.178405	0.358	0.261	1
FBgn0004198	CG11387	ct	0.00344112	1.43979	0.722	0.593	1
FBgn0039816	CG11317	CG11317	0.00354541	-0.00629546	0.114	0.116	1
FBgn0051619	CG31619	nolo	0.00363282	0.0702214	0.191	0.152	1
FBgn0000097	CG3166	aop	0.00363713	0.0879497	0.2	0.143	1
FBgn0053517	CG33517	Dop2R	0.0039509	0.971602	0.589	0.497	1
FBgn0261574	CG7749	kug	0.00409643	0.0468316	0.159	0.127	1
FBgn0033159	CG17800	Dscam1	0.00447812	0.0510675	0.137	0.106	1
FBgn0264442	CG43860	ab	0.00448796	0.0424422	0.151	0.113	1
FBgn0266100	CG44837	CG44837	0.00464615	0.0693659	0.173	0.13	1
FBgn0261928	CG42795	CG42795	0.00484874	0.210894	0.399	0.312	1
FBgn0261046	CG31190	Dscam3	0.00507019	0.0755371	0.154	0.115	1
FBgn0053179	CG33179	beat-IIIb	0.00558624	-0.0351807	0.34	0.337	1
FBgn0267253	CG32700	CG32700	0.00596109	0.197449	0.385	0.308	1
FBgn0085383	CG34354	CG34354	0.0061144	0.094923	0.247	0.201	1
FBgn0031530	CG3254	Pgant2	0.00634529	0.0399102	0.118	0.094	1
FBgn0265487	CG33197	mbl	0.00652529	0.819473	0.492	0.375	1
FBgn0034408	CG12758	sano	0.00670825	0.0445628	0.117	0.086	1
FBgn0010434	CG11949	cora	0.00672041	0.0288231	0.116	0.091	1
FBgn0267668	CR46006	lncRNA:CR46006	0.00682905	0.128685	0.291	0.234	1
FBgn0038665	CG12269	euc	0.0068909	0.0598546	0.129	0.095	1
FBgn0085410	CG34381	TrissinR	0.00749619	0.0277258	0.11	0.087	1
FBgn0035173	CG13907	CG13907	0.00749731	0.0294069	0.115	0.09	1
FBgn0266871	CR45332	lncRNA:CR45332	0.00791115	-0.0409935	0.192	0.205	1
FBgn0015229	CG6575	glec	0.00793425	0.289483	0.408	0.287	1
FBgn0014859	CG1864	Hr38	0.00809696	-0.0476558	0.332	0.322	1
FBgn0259171	CG42276	Pde9	0.00876521	0.149056	0.473	0.445	1
FBgn0264503	CG43902	CG43902	0.00888274	0.0794961	0.159	0.11	1
FBgn0031306	CG4577	CG4577	0.00976043	0.070664	0.195	0.158	1
FBgn0039647	CG14509	jus	0.00981886	0.296643	0.532	0.451	1
FBgn0262593	CG43128	Shab	0.010465	0.251304	0.471	0.379	1
FBgn0267336	CG34360	Glut4EF	0.0107676	1.00072	0.828	0.779	1
FBgn0263219	CG42330	Dscam4	0.0107973	0.149524	0.367	0.297	1
FBgn0250910	CG42244	Octbeta3R	0.0111563	0.0389442	0.161	0.13	1
FBgn0260660	CG42543	Mp	0.011373	0.16237	0.382	0.326	1
FBgn0013973	CG1470	Gycbeta100B	0.0120816	0.0353935	0.144	0.116	1
FBgn0053126	CG33126	NLaz	0.0123964	-0.0617383	0.23	0.248	1
FBgn0036494	CG7250	Toll-6	0.0129316	0.279582	0.318	0.217	1
FBgn0003091	CG6622	Pkc53E	0.0131092	0.654576	0.55	0.398	1
FBgn0036144	CG6207	GlcAT-P	0.0134913	0.0961134	0.215	0.161	1
FBgn0004858	CG4220	elB	0.0136716	0.0504701	0.186	0.149	1
FBgn0085447	CG34418	sif	0.013756	1.49231	0.789	0.63	1
FBgn0039089	CG10152	beat-IV	0.0138042	0.0950101	0.307	0.257	1
FBgn0266801	CG45263	CG45263	0.0140626	-0.0543174	0.488	0.511	1
FBgn0023179	CG6438	amon	0.0142478	0.227793	0.382	0.285	1
FBgn0085395	CG34366	Shawl	0.0155287	0.0431001	0.213	0.184	1
FBgn0283451	CG11491	br	0.0161047	0.133562	0.152	0.118	1
FBgn0259242	CG42340	CG42340	0.0166355	0.0876376	0.238	0.185	1
FBgn0263397	CG8585	Ih	0.0167326	1.3871	0.896	0.797	1
FBgn0000547	CG12676	ed	0.0169464	0.112265	0.232	0.187	1
FBgn0037153	CG12673	olf413	0.0173434	0.0618243	0.223	0.191	1
FBgn0031697	CG14024	CG14024	0.0176537	0.0282432	0.159	0.133	1
FBgn0005558	CG1464	ey	0.0184815	-0.0154908	0.094	0.11	1
FBgn0031381	CG7291	Npc2a	0.0187716	-0.0454081	0.118	0.138	1
FBgn0040765	CG33473	luna	0.0190261	0.287836	0.437	0.349	1
FBgn0085407	CG34378	Pvf3	0.0192187	0.456131	0.573	0.454	1
FBgn0263220	CG43388	Hk	0.0195534	0.632606	0.752	0.651	1
FBgn0039380	CG5890	CG5890	0.0196919	-0.0111692	0.257	0.255	1
FBgn0043364	CG4427	cbt	0.0201455	0.0227221	0.104	0.084	1
FBgn0259212	CG42312	cno	0.0201836	0.0317069	0.108	0.083	1
FBgn0085382	CG34353	CG34353	0.0203159	0.0306966	0.156	0.136	1
FBgn0036454	CG17839	CG17839	0.0203232	0.0711822	0.239	0.196	1
FBgn0261262	CG42613	CG42613	0.0216362	0.936041	0.677	0.5	1
FBgn0000635	CG3665	Fas2	0.0224138	0.32077	0.345	0.226	1
FBgn0085420	CG34391	DIP-delta	0.0232476	0.184374	0.244	0.205	1
FBgn0030574	CG9413	sbm	0.0233549	0.0374516	0.187	0.161	1
FBgn0083963	CG34127	Nlg3	0.0255006	0.0627644	0.588	0.577	1
FBgn0031374	CG7337	Wdr62	0.0256301	0.309106	0.456	0.333	1
FBgn0028645	CG7644	beat-Ib	0.0279358	0.0723353	0.28	0.246	1
FBgn0000108	CG7727	Appl	0.0287502	0.586947	0.766	0.727	1
FBgn0004880	CG1130	scrt	0.0288651	0.634285	0.876	0.865	1
FBgn0031770	CG13995	CG13995	0.0291513	0.113108	0.266	0.221	1
FBgn0052506	CG32506	CG32506	0.0295788	0.0521466	0.201	0.165	1
FBgn0036381	CG8745	CG8745	0.0313326	0.0366709	0.132	0.103	1
FBgn0028370	CG4192	kek3	0.031541	0.00803484	0.167	0.172	1
FBgn0003499	CG7847	sr	0.0318507	0.0297435	0.168	0.151	1
FBgn0036043	CG8177	CG8177	0.0334446	0.0868678	0.342	0.299	1
FBgn0030412	CG17762	Tomosyn	0.0348117	0.640691	0.746	0.644	1
FBgn0031424	CG9887	VGlut	0.0356078	0.376371	0.244	0.161	1
FBgn0033268	CG2297	Obp44a	0.0358199	0.463203	0.294	0.232	1
FBgn0085391	CG34362	trv	0.0361256	0.823645	0.55	0.445	1
FBgn0027339	CG11352	jim	0.0366528	1.56471	0.94	0.91	1
FBgn0031897	CG13784	CG13784	0.0379322	0.0627461	0.244	0.199	1
FBgn0267033	CG45477	mamo	0.0381006	1.34399	0.698	0.63	1
FBgn0052432	CG32432	CG32432	0.0382766	0.128736	0.39	0.336	1
FBgn0014184	CG16747	Oda	0.0397856	0.270637	0.68	0.639	1
FBgn0033438	CG1794	Mmp2	0.0405519	0.0476253	0.219	0.182	1
FBgn0033250	CG14762	CG14762	0.0409256	0.0764147	0.206	0.147	1
FBgn0011582	CG9652	Dop1R1	0.0412169	0.019824	0.185	0.176	1
FBgn0264339	CG43795	CG43795	0.0416989	0.0578881	0.129	0.099	1
FBgn0264386	CG15899	Ca-alpha1T	0.041723	0.830716	0.58	0.463	1
FBgn0261999	CG42817	Ca-Ma2d	0.0434749	0.0563917	0.139	0.1	1
FBgn0000575	CG1007	emc	0.0435579	0.0543729	0.434	0.409	1
FBgn0085400	CG34371	side-V	0.0456809	0.074246	0.215	0.176	1
FBgn0035816	CG13685	CG13685	0.0458949	0.018429	0.144	0.13	1
FBgn0001186	CG3001	Hex-A	0.0463069	1.42392	0.761	0.54	1
FBgn0259234	CG42332	Camta	0.0463931	0.0531348	0.157	0.117	1
FBgn0034286	CG33996	dpr13	0.0468331	0.248876	0.399	0.325	1
FBgn0010412	CG4464	RpS19a	0.0469481	0.0593611	0.307	0.268	1
FBgn0002643	CG8118	mam	0.0470143	0.0602355	0.236	0.194	1
FBgn0052204	CG32204	CG32204	0.0487161	0.0287392	0.142	0.131	1
FBgn0260658	CG42541	CG42541	0.0494148	-0.10553	0.495	0.487	1
FBgn0051760	CG31760	CG31760	0.051009	0.0418272	0.184	0.17	1
FBgn0263257	CG43395	Cngl	0.0510698	1.00012	0.645	0.532	1
FBgn0045038	CG7105	Proc	0.0522184	0.0451178	0.188	0.18	1
FBgn0003429	CG10693	slo	0.0523465	0.356658	0.66	0.594	1
FBgn0050089	CG30089	CG30089	0.0524026	-0.000945337	0.156	0.162	1
FBgn0037546	CG7918	mAChR-B	0.0527474	0.0692118	0.186	0.156	1
FBgn0028644	CG4838	beat-Ic	0.0534448	0.416654	0.396	0.292	1
FBgn0260943	CG32169	Rbp6	0.0550987	2.25739	0.873	0.819	1
FBgn0011666	CG5099	msi	0.0579112	1.25677	0.838	0.713	1
FBgn0259108	CG34387	futsch	0.0581356	1.35421	0.819	0.755	1
FBgn0259244	CG42342	CG42342	0.059879	0.134797	0.382	0.317	1
FBgn0285952	CG3186	eEF5	0.0630269	0.065401	0.292	0.248	1
FBgn0031294	CG31795	IA-2	0.0664809	4.03974	0.949	0.94	1
FBgn0264815	CG44007	Pde1c	0.0676898	0.110793	0.337	0.286	1
FBgn0000535	CG10952	eag	0.068489	0.105316	0.301	0.254	1
FBgn0033108	CG15236	CG15236	0.0697937	0.0719088	0.316	0.281	1
FBgn0259111	CG42253	Ndae1	0.0720928	0.0347967	0.13	0.107	1
FBgn0286778	CG46385	CG46385	0.0734663	0.126766	0.302	0.245	1
FBgn0284245	CG8280	eEF1alpha1	0.0743722	0.0308602	0.391	0.381	1
FBgn0015400	CG4977	kek2	0.0748387	0.130105	0.361	0.313	1
FBgn0041097	CG5423	robo3	0.0756995	0.0507067	0.216	0.185	1
FBgn0259935	CG42458	CG42458	0.0761124	0.0488553	0.116	0.089	1
FBgn0033196	CG1358	CG1358	0.0761735	0.0345906	0.105	0.079	1
FBgn0262737	CG7437	mub	0.0786666	0.987518	0.737	0.691	1
FBgn0259245	CG42343	DIP-beta	0.0821839	0.0266713	0.14	0.136	1
FBgn0038156	CG14372	side-IV	0.0850265	0.0329569	0.189	0.171	1
FBgn0264308	CG43778	CG43778	0.085241	0.10278	0.266	0.219	1
FBgn0041707	CG1168	7B2	0.0895516	-0.0428382	0.767	0.793	1
FBgn0001091	CG12055	Gapdh1	0.0911242	-0.0514652	0.425	0.44	1
FBgn0261089	CG5559	Sytalpha	0.0913943	0.0496939	0.109	0.078	1
FBgn0037676	CG8861	CG8861	0.0962615	0.349966	0.512	0.469	1
FBgn0030432	CG4404	CG4404	0.100656	0.0263561	0.145	0.121	1
FBgn0032151	CG4128	nAChRalpha6	0.10171	1.00776	0.661	0.524	1
FBgn0053143	CG33143	CG33143	0.109856	0.00847363	0.171	0.163	1
FBgn0261556	CG42674	CG42674	0.111213	0.105337	0.254	0.217	1
FBgn0029939	CG9650	CG9650	0.11366	0.219795	0.318	0.262	1
FBgn0030897	CG5744	Frq1	0.113764	0.712982	0.576	0.429	1
FBgn0086677	CG30040	jeb	0.114069	0.4349	0.387	0.288	1
FBgn0011224	CG31000	heph	0.115346	1.08041	0.614	0.501	1
FBgn0261244	CG33174	inaE	0.116962	0.23089	0.451	0.363	1
FBgn0031736	CG11030	CG11030	0.117011	0.0362626	0.136	0.111	1
FBgn0264001	CG43744	bru3	0.119501	0.406259	0.462	0.35	1
FBgn0284243	CG9277	betaTub56D	0.121097	0.191216	0.417	0.337	1
FBgn0023095	CG11282	caps	0.121909	0.0429116	0.202	0.171	1
FBgn0266137	CG18741	Dop1R2	0.124591	0.0171607	0.115	0.098	1
FBgn0027589	CG1688	CG1688	0.126983	-0.00412887	0.221	0.241	1
FBgn0261258	CG6014	rgn	0.128049	0.0342435	0.139	0.113	1
FBgn0083991	CG34155	CG34155	0.131017	-0.00295993	0.123	0.123	1
FBgn0053516	CG33516	dpr3	0.131605	0.0492811	0.11	0.089	1
FBgn0042630	CG32139	Sox21b	0.142383	0.0483463	0.102	0.081	1
FBgn0030723	CG14948	dpr18	0.143119	0.0273168	0.181	0.16	1
FBgn0034978	CG3257	CG3257	0.144241	0.0332774	0.185	0.166	1
FBgn0263995	CG43738	cpo	0.145285	0.459766	0.652	0.567	1
FBgn0003165	CG9755	pum	0.149059	0.807789	0.834	0.741	1
FBgn0259821	CG42402	CG42402	0.152236	0.0871142	0.243	0.202	1
FBgn0001234	CR31400	lncRNA:Hsromega	0.156859	2.6189	0.965	0.971	1
FBgn0085370	CG34341	Pde11	0.158859	0.0500144	0.106	0.076	1
FBgn0265597	CG44424	rad	0.159765	0.31508	0.441	0.37	1
FBgn0051774	CG31774	fred	0.163889	0.0332026	0.168	0.148	1
FBgn0000037	CG4356	mAChR-A	0.164423	0.305393	0.526	0.47	1
FBgn0085412	CG34383	kmr	0.166539	0.149898	0.342	0.275	1
FBgn0262018	CG42829	CadN2	0.171459	0.0385749	0.212	0.19	1
FBgn0265182	CG44247	CG44247	0.174009	0.050171	0.231	0.193	1
FBgn0026160	CG7958	tna	0.175682	0.32603	0.527	0.412	1
FBgn0004369	CG11516	Ptp99A	0.181369	0.467028	0.664	0.586	1
FBgn0052183	CG32183	Ccn	0.187432	0.0465156	0.135	0.118	1
FBgn0264908	CG44099	pHCl-1	0.191284	0.0493057	0.207	0.189	1
FBgn0263994	CG43737	CG43737	0.194339	0.322137	0.485	0.367	1
FBgn0024963	CG7535	GluClalpha	0.198129	0.931939	0.789	0.737	1
FBgn0027598	CG31012	cindr	0.202351	0.578286	0.652	0.503	1
FBgn0052647	CG32647	CG32647	0.216892	0.0430551	0.292	0.268	1
FBgn0085387	CG34358	shakB	0.22131	0.1712	0.44	0.401	1
FBgn0013467	CG18285	igl	0.224402	0.29322	0.532	0.464	1
FBgn0053202	CG33202	dpr11	0.231393	0.0577403	0.348	0.323	1
FBgn0261552	CG42670	ps	0.234353	0.811219	0.946	0.949	1
FBgn0035032	CG4692	ATPsynF	0.237847	0.143643	0.861	0.867	1
FBgn0005775	CG7503	Con	0.239644	0.745572	0.513	0.395	1
FBgn0034753	CG2852	CG2852	0.24019	0.0961969	0.476	0.42	1
FBgn0004606	CG1322	zfh1	0.249398	0.043799	0.12	0.098	1
FBgn0024944	CG3856	Oamb	0.256181	0.0336864	0.111	0.09	1
FBgn0000064	CG6058	Ald1	0.259469	0.0561347	0.811	0.772	1
FBgn0028875	CG32975	nAChRalpha5	0.260763	0.759085	0.752	0.715	1
FBgn0015609	CG7100	CadN	0.261592	0.227287	0.44	0.351	1
FBgn0262509	CG43079	nrm	0.270357	0.0271459	0.15	0.133	1
FBgn0051221	CG31221	CG31221	0.271507	1.20211	0.594	0.433	1
FBgn0034138	CG8332	RpS15	0.271554	0.192445	0.892	0.918	1
FBgn0267579	CR45919	lncRNA:CR45919	0.275689	0.0149927	0.101	0.085	1
FBgn0029761	CG10706	SK	0.278466	0.319204	0.547	0.447	1
FBgn0028496	CG30116	CG30116	0.279047	0.171165	0.44	0.375	1
FBgn0035170	CG12191	dpr20	0.286912	0.0259654	0.134	0.12	1
FBgn0033192	CG2105	Corin	0.292759	0.167671	0.438	0.395	1
FBgn0000636	CG5803	Fas3	0.29332	0.0340451	0.194	0.176	1
FBgn0270928	CG32848	VAChT	0.29888	0.110484	0.185	0.11	1
FBgn0013981	CG3379	His4r	0.306107	0.4596	0.924	0.906	1
FBgn0053147	CG33147	Hs3st-A	0.306697	0.246573	0.428	0.324	1
FBgn0033484	CG2269	CG2269	0.309931	0.291438	0.721	0.717	1
FBgn0000036	CG5610	nAChRalpha1	0.310314	0.15098	0.411	0.357	1
FBgn0285944	CG9907	para	0.313676	1.27692	0.879	0.849	1
FBgn0261597	CG10305	RpS26	0.315061	-0.0773618	0.846	0.903	1
FBgn0267252	CG3694	Ggamma30A	0.316788	0.996701	0.89	0.869	1
FBgn0036927	CG7433	Gabat	0.32701	0.0235313	0.328	0.336	1
FBgn0030505	CG11172	NFAT	0.328578	0.122935	0.308	0.253	1
FBgn0264606	CG43955	Fife	0.332171	0.09495	0.413	0.373	1
FBgn0035499	CG14996	Chd64	0.337737	0.0141365	0.125	0.114	1
FBgn0261788	CG42734	Ank2	0.3446	0.694911	0.741	0.667	1
FBgn0263997	CG43740	CG43740	0.346357	0.00915043	0.114	0.111	1
FBgn0264006	CG43749	dysc	0.348253	0.424573	0.775	0.754	1
FBgn0264574	CG43946	Glut1	0.352761	0.0319284	0.282	0.266	1
FBgn0066101	CG31094	LpR1	0.356316	0.108915	0.328	0.313	1
FBgn0031632	CG15628	CG15628	0.357882	0.0930811	0.434	0.393	1
FBgn0010313	CG2530	corto	0.361845	0.122068	0.424	0.376	1
FBgn0039420	CG6154	CG6154	0.366456	0.0786308	0.207	0.177	1
FBgn0030174	CG15312	CG15312	0.368965	0.0331591	0.149	0.131	1
FBgn0005771	CG4491	noc	0.36897	-0.00294694	0.169	0.169	1
FBgn0265052	CG44167	St3	0.371468	0.0325174	0.247	0.223	1
FBgn0022382	CG15862	Pka-R2	0.372459	0.181601	0.325	0.235	1
FBgn0031835	CG11319	CG11319	0.377346	0.0794543	0.299	0.266	1
FBgn0032833	CG10664	COX4	0.379013	-0.163119	0.836	0.872	1
FBgn0262508	CG43078	CG43078	0.380941	0.0126752	0.103	0.088	1
FBgn0035092	CG3441	Nplp1	0.382366	0.128576	0.319	0.312	1
FBgn0250839	CG2016	CG2016	0.388365	0.0461425	0.102	0.1	1
FBgn0001233	CG1242	Hsp83	0.392282	0.096714	0.645	0.627	1
FBgn0004611	CG4574	Plc21C	0.393529	0.150489	0.403	0.33	1
FBgn0039584	CG14064	beat-VI	0.399454	0.0154789	0.162	0.153	1
FBgn0266851	CR45312	lncRNA:CR45312	0.400384	-0.0441156	0.456	0.452	1
FBgn0000633	CG17716	CG17716	0.407453	0.304652	0.483	0.417	1
FBgn0032400	CG6770	CG6770	0.408719	0.45367	0.645	0.527	1
FBgn0004516	CG14994	Gad1	0.419961	1.04701	0.923	0.89	1
FBgn0003274	CG4918	RpLP2	0.422585	0.0721535	0.617	0.608	1
FBgn0036935	CG14186	CG14186	0.432051	0.0369334	0.198	0.172	1
FBgn0030090	CG12664	fend	0.432606	0.307604	0.597	0.545	1
FBgn0001235	CG17117	hth	0.439993	0.751338	0.696	0.613	1
FBgn0039349	CG4685	Ssadh	0.443421	-0.0249035	0.303	0.314	1
FBgn0004910	CG15855	Eip63F-1	0.451699	0.0947773	0.311	0.286	1
FBgn0085421	CG34392	Epac	0.455315	0.0652834	0.186	0.154	1
FBgn0038237	CG8279	Pde6	0.466224	0.248586	0.479	0.407	1
FBgn0264490	CG18389	Eip93F	0.475039	0.294106	0.414	0.329	1
FBgn0034636	CG10440	twz	0.476255	0.0256091	0.163	0.154	1
FBgn0036844	CG14080	Mkp3	0.47712	0.194895	0.41	0.329	1
FBgn0010473	CG15427	tutl	0.477691	0.285472	0.536	0.467	1
FBgn0086778	CG32538	nAChRalpha7	0.479059	0.595509	0.686	0.638	1
FBgn0034731	CG10384	CG10384	0.480444	0.0155322	0.117	0.106	1
FBgn0053543	CG33543	CG33543	0.482183	0.225787	0.307	0.234	1
FBgn0038839	CG10830	Ktl	0.485224	0.0349771	0.337	0.324	1
FBgn0262869	CG43224	Gfrl	0.493027	0.147758	0.333	0.292	1
FBgn0036165	CG7533	chrb	0.49442	0.423301	0.595	0.497	1
FBgn0086758	CG31666	chinmo	0.49478	0.35191	0.644	0.541	1
FBgn0083949	CG34113	side-III	0.497401	0.259861	0.446	0.361	1
FBgn0002593	CG4087	RpLP1	0.498878	0.0262346	0.799	0.813	1
FBgn0267001	CG42338	Ten-a	0.51055	1.53536	0.871	0.759	1
FBgn0016061	CG31062	side	0.516946	0.219564	0.409	0.355	1
FBgn0014163	CG4609	fax	0.518957	0.517664	0.547	0.371	1
FBgn0003380	CG12348	Sh	0.519587	1.06381	0.802	0.764	1
FBgn0010114	CG2040	hig	0.521235	0.286395	0.459	0.378	1
FBgn0003435	CG9218	sm	0.52662	0.811344	0.839	0.807	1
FBgn0264087	CG43756	Slob	0.52742	0.0561972	0.222	0.198	1
FBgn0037874	CG4800	Tctp	0.529036	-0.0233312	0.494	0.505	1
FBgn0038282	CG33485	dpr9	0.53162	0.340085	0.432	0.34	1
FBgn0259213	CG42313	side-II	0.534113	0.0617934	0.438	0.423	1
FBgn0260657	CG42540	CG42540	0.536859	0.307903	0.543	0.48	1
FBgn0039064	CG4467	CG4467	0.54027	0.311551	0.47	0.346	1
FBgn0066084	CG30425	RpL41	0.540539	2.78496	0.897	0.685	1
FBgn0020907	CG14904	Scp2	0.542183	0.238224	0.186	0.178	1
FBgn0261836	CG42768	Msp300	0.546414	1.24437	0.833	0.761	1
FBgn0000273	CG4379	Pka-C1	0.553826	0.358069	0.602	0.526	1
FBgn0032901	CG9339	sky	0.559509	0.115049	0.458	0.42	1
FBgn0011661	CG10701	Moe	0.559964	0.0444789	0.167	0.146	1
FBgn0263289	CG43398	scrib	0.569812	0.0409886	0.236	0.22	1
FBgn0267910	CR34335	lncRNA:CR34335	0.575216	16.5319	0.987	0.904	1
FBgn0004595	CG17228	pros	0.591114	2.78227	0.839	0.751	1
FBgn0263512	CG33980	Vsx2	0.596228	-0.0230363	0.117	0.127	1
FBgn0285948	CG15442	RpL27A	0.60605	0.0955486	0.805	0.832	1
FBgn0031414	CG33955	eys	0.608556	0.198369	0.391	0.325	1
FBgn0031258	CG4297	CG4297	0.612882	-0.00872743	0.154	0.157	1
FBgn0266418	CG45058	wake	0.633048	0.00681078	0.127	0.117	1
FBgn0085434	CG34405	NaCP60E	0.634919	0.673758	0.767	0.687	1
FBgn0041605	CG32490	cpx	0.6505	1.11421	0.988	0.995	1
FBgn0028481	CG4341	CG4341	0.661156	0.0621441	0.272	0.246	1
FBgn0003423	CG1417	slgA	0.662175	0.308274	0.714	0.665	1
FBgn0040823	CG14162	dpr6	0.663179	0.0225185	0.217	0.216	1
FBgn0013954	CG11001	Fkbp12	0.668444	0.0312625	0.465	0.46	1
FBgn0038063	CG33976	Octbeta2R	0.673015	0.267266	0.526	0.444	1
FBgn0000024	CG17907	Ace	0.673695	0.242947	0.442	0.368	1
FBgn0263392	CG43444	Tet	0.686518	0.214643	0.685	0.648	1
FBgn0052264	CG32264	CG32264	0.687075	0.655742	0.789	0.706	1
FBgn0040805	CG12355	CG12355	0.693142	-0.00977668	0.176	0.18	1
FBgn0052017	CG32017	CG32017	0.699951	0.38205	0.738	0.685	1
FBgn0262782	CG5362	Mdh1	0.704595	0.0305158	0.25	0.227	1
FBgn0010113	CG15532	hdc	0.717505	0.550342	0.44	0.293	1
FBgn0029897	CG3203	RpL17	0.721018	0.0816462	0.736	0.734	1
FBgn0261804	CG42750	CG42750	0.732255	0.122662	0.489	0.477	1
FBgn0037913	CG6783	fabp	0.736411	-0.0105451	0.166	0.161	1
FBgn0027654	CG2239	jdp	0.7457	0.27103	0.491	0.44	1
FBgn0264005	CG43748	Hmx	0.750319	0.0249428	0.121	0.109	1
FBgn0263930	CG4974	dally	0.753469	0.208431	0.34	0.303	1
FBgn0000042	CG4027	Act5C	0.754423	0.163129	0.575	0.558	1
FBgn0004244	CG10537	Rdl	0.755151	0.794674	0.888	0.878	1
FBgn0004242	CG3139	Syt1	0.758271	0.840602	0.891	0.905	1
FBgn0041094	CG7590	scyl	0.758525	0.173128	0.399	0.338	1
FBgn0083950	CG34114	side-VI	0.778211	0.318165	0.44	0.359	1
FBgn0265002	CG44153	CG44153	0.780994	0.0208069	0.206	0.191	1
FBgn0028704	CG18660	Nckx30C	0.781282	0.349972	0.764	0.75	1
FBgn0004514	CG7485	Oct-TyrR	0.781722	0.0305646	0.166	0.159	1
FBgn0038653	CG18208	Octalpha2R	0.802301	0.141691	0.419	0.377	1
FBgn0037525	CG17816	CG17816	0.802979	0.229102	0.541	0.476	1
FBgn0017590	CG6669	klg	0.817365	0.144626	0.367	0.332	1
FBgn0002023	CG10699	Lim3	0.832424	0.129612	0.441	0.434	1
FBgn0262738	CG3620	norpA	0.835395	0.106361	0.502	0.472	1
FBgn0261871	CG33507	dpr2	0.856322	0.0309599	0.146	0.138	1
FBgn0034725	CG6044	CG6044	0.858947	-0.0346303	0.5	0.5	1
FBgn0001149	CG10045	GstD1	0.859361	0.0061217	0.108	0.104	1
FBgn0085432	CG34403	pan	0.865157	0.616157	0.785	0.734	1
FBgn0027608	CG2082	CG2082	0.865879	0.0701224	0.331	0.306	1
FBgn0263980	CG43729	Stacl	0.871531	0.123242	0.423	0.371	1
FBgn0010263	CG3151	Rbp9	0.872103	0.237487	0.443	0.356	1
FBgn0010415	CG10497	Sdc	0.872649	0.294684	0.702	0.662	1
FBgn0013686	CR34094	mt:lrRNA	0.877266	3.38104	0.915	0.778	1
FBgn0250908	CG42242	beat-VII	0.880109	0.0787515	0.333	0.306	1
FBgn0038321	CG6218	CG6218	0.896721	0.00302733	0.118	0.121	1
FBgn0013576	CG32464	mtd	0.901043	0.61224	0.804	0.751	1
FBgn0019643	CG3318	AANAT1	0.91356	0.0021364	0.363	0.366	1
FBgn0044328	CG32052	CG32052	0.914184	0.0228787	0.204	0.2	1
FBgn0000303	CG12345	ChAT	0.915561	0.0308332	0.118	0.098	1
FBgn0033544	CG7220	CG7220	0.920932	0.00558532	0.211	0.212	1
FBgn0032840	CG13968	sNPF	0.930619	0.204209	0.257	0.245	1
FBgn0038826	CG17838	Syp	0.938895	0.358762	0.612	0.517	1
FBgn0033926	CG12505	Arc1	0.943699	-0.119416	0.146	0.136	1
FBgn0052062	CG32062	Rbfox1	0.947867	0.949466	0.809	0.731	1
FBgn0039054	CG13830	Cow	0.948142	0.163283	0.423	0.346	1
FBgn0015399	CG12283	kek1	0.94861	0.183372	0.425	0.37	1
FBgn0003360	CG16944	sesB	0.950088	0.543787	0.869	0.897	1
FBgn0263353	CG11000	CG11000	0.961327	0.214158	0.446	0.371	1
FBgn0051665	CG31665	wry	0.963787	0.318753	0.405	0.319	1
FBgn0001145	CG1743	Gs2	0.966191	0.015646	0.114	0.111	1
FBgn0083975	CG34139	Nlg4	0.981104	0.0269742	0.186	0.178	1
FBgn0030058	CG11294	CG11294	0.981763	0.0170487	0.274	0.277	1
FBgn0010411	CG8900	RpS18	0.996009	-0.110184	0.87	0.901	1

[truncated: 27 more sheets: Global_C10, Global_C11, Global_C12, Global_C13, Global_C14, Global_C15, Global_C16, Global_C17, Global_C18, Global_C19, Global_C20, Global_C21, Global_C22, Global_C23, Global_C24, Global_C25, Global_C26, Global_C27, Global_C28, Global_C29 …]
