# Supplementary material for: The Drosophila brain on cocaine at single-cell resolution
Source: Genome Res. 2021 Oct;31(10):1927–37. doi: 10.1101/gr.268037.120 (PMC8494231; doi:10.1101/gr.268037.120)
Supplement: Supplemental Material [file supp_gr.268037.120_Supplemental_Table_S7_xlsx.xlsx]

## Sheet: Male_C0
FlyBaseID	GeneID	Gene symbol	p_val	avg_diff	pct.1	pct.2	p_val_adj
FBgn0019660	CR32665	lncRNA:roX2	3.49555e-223	-1.47836	0.003	0.616	5.24332e-220
FBgn0004047	CG11129	Yp3	4.66907e-134	0.258744	0.163	0.002	7.0036e-131
FBgn0087002	CG11064	apolpp	3.44032e-49	0.173008	0.2	0.067	5.16048e-46
FBgn0058469	CR40469	lncRNA:CR40469	1.12721e-47	0.111047	0.162	0.067	1.69082e-44
FBgn0267519	CR45859	28SrRNA-Psi:CR45859	9.56027e-47	-0.0636542	0.061	0.119	1.43404e-43
FBgn0050115	CG30115	GEFmeso	6.13965e-31	0.0800557	0.142	0.082	9.20947e-28
FBgn0285926	CG1691	Imp	3.64507e-29	0.814165	0.369	0.17	5.46761e-26
FBgn0260429	CG42524	CG42524	4.62479e-27	0.132335	0.225	0.133	6.93718e-24
FBgn0052626	CG32626	AMPdeam	2.32243e-25	0.111064	0.232	0.152	3.48364e-22
FBgn0052057	CG32057	dpr10	1.5553e-24	0.25583	0.286	0.138	2.33296e-21
FBgn0051690	CG31690	CG31690	7.616e-23	0.258795	0.351	0.207	1.1424e-19
FBgn0052066	CG32066	CG32066	2.59656e-21	0.100877	0.215	0.132	3.89484e-18
FBgn0267431	CG45784	Myo81F	3.32161e-21	0.103276	0.188	0.113	4.98241e-18
FBgn0037963	CG6977	Cad87A	5.81502e-21	0.168896	0.251	0.152	8.72253e-18
FBgn0052982	CG32982	CG32982	7.79845e-20	0.167454	0.214	0.117	1.16977e-16
FBgn0036821	CG3961	CG3961	2.16209e-18	0.0734687	0.109	0.049	3.24314e-15
FBgn0036789	CG13702	AstC-R2	2.87376e-18	0.224717	0.223	0.125	4.31064e-15
FBgn0083228	CG5907	Frq2	4.87786e-18	0.470134	0.463	0.273	7.31679e-15
FBgn0029768	CG16752	SPR	1.21333e-17	0.327652	0.286	0.139	1.82e-14
FBgn0013995	CG5685	Calx	2.44198e-17	0.265402	0.365	0.23	3.66296e-14
FBgn0250867	CG42238	CG42238	1.23307e-16	0.189129	0.293	0.176	1.8496e-13
FBgn0264090	CG43759	CG43759	2.05889e-16	0.260302	0.277	0.156	3.08833e-13
FBgn0020621	CG2049	Pkn	3.63151e-16	0.0951435	0.18	0.106	5.44727e-13
FBgn0283499	CG18402	InR	2.12469e-15	0.119847	0.272	0.178	3.18704e-12
FBgn0015766	CG10596	Msr-110	2.3146e-15	0.0712926	0.114	0.053	3.4719e-12
FBgn0002945	CG11614	nkd	4.14572e-15	0.346174	0.386	0.225	6.21857e-12
FBgn0087012	CG1056	5-HT2A	1.56473e-14	0.107202	0.154	0.086	2.34709e-11
FBgn0259677	CG42346	CG42346	6.37262e-14	0.108848	0.193	0.113	9.55892e-11
FBgn0052683	CG32683	CG32683	1.39046e-13	0.117368	0.216	0.138	2.08569e-10
FBgn0086604	CG12484	side-VIII	1.46218e-13	0.210254	0.32	0.207	2.19326e-10
FBgn0004573	CG12073	5-HT7	2.63861e-13	0.0731008	0.147	0.088	3.95792e-10
FBgn0031299	CG4629	CG4629	2.81693e-13	0.109133	0.208	0.125	4.22539e-10
FBgn0002543	CG5481	robo2	5.57906e-13	0.152651	0.172	0.101	8.36859e-10
FBgn0085397	CG34368	Fili	1.0187e-12	0.0992916	0.171	0.104	1.52806e-09
FBgn0004619	CG8442	GluRIA	1.34009e-12	0.422327	0.423	0.255	2.01013e-09
FBgn0003301	CG9533	rut	1.79397e-12	0.134183	0.277	0.173	2.69096e-09
FBgn0003499	CG7847	sr	3.38392e-12	0.177529	0.306	0.215	5.07588e-09
FBgn0001226	CG4466	Hsp27	3.79724e-12	0.106364	0.187	0.133	5.69586e-09
FBgn0261260	CG42611	mgl	4.64084e-12	0.122106	0.216	0.132	6.96126e-09
FBgn0019662	CG8593	qm	6.52531e-12	0.0887186	0.146	0.083	9.78797e-09
FBgn0264753	CG44011	Rgk1	8.52808e-12	0.189822	0.23	0.128	1.27921e-08
FBgn0036801	CG6896	MYPT-75D	8.97622e-12	0.126352	0.278	0.196	1.34643e-08
FBgn0050463	CG30463	Pgant9	2.22579e-11	0.18559	0.283	0.181	3.33869e-08
FBgn0001224	CG4463	Hsp23	3.14741e-11	0.183877	0.256	0.181	4.72111e-08
FBgn0040153	CG32597	l(1)G0469	3.61736e-11	0.0834318	0.141	0.072	5.42604e-08
FBgn0005677	CG4952	dac	9.67643e-11	0.138804	0.124	0.065	1.45146e-07
FBgn0267322	CR45758	lncRNA:CR45758	1.73649e-10	0.10785	0.236	0.162	2.60474e-07
FBgn0052698	CG32698	CARPB	1.76283e-10	0.224148	0.174	0.095	2.64424e-07
FBgn0002940	CG4550	ninaE	2.52184e-10	-0.128681	0.157	0.242	3.78275e-07
FBgn0029824	CG3726	CG3726	2.90548e-10	0.182338	0.241	0.139	4.35822e-07
FBgn0031738	CG9171	CG9171	3.12695e-10	0.0879041	0.172	0.109	4.69042e-07
FBgn0263773	CG43690	fok	3.36272e-10	0.21538	0.326	0.201	5.04408e-07
FBgn0040532	CG8369	CG8369	3.47651e-10	0.177011	0.218	0.125	5.21476e-07
FBgn0052521	CG32521	CG32521	3.53221e-10	0.0619977	0.142	0.091	5.29831e-07
FBgn0030158	CG9686	CG9686	4.02987e-10	0.102099	0.137	0.068	6.04481e-07
FBgn0051814	CG31814	DIP-kappa	4.40065e-10	0.185956	0.216	0.133	6.60098e-07
FBgn0263772	CG43689	CG43689	7.68926e-10	0.290134	0.146	0.082	1.15339e-06
FBgn0283651	CG46301	CG46301	8.16364e-10	0.175741	0.336	0.258	1.22455e-06
FBgn0000636	CG5803	Fas3	8.73365e-10	0.0881009	0.245	0.188	1.31005e-06
FBgn0260971	CG42594	CG42594	1.00807e-09	0.333527	0.351	0.197	1.5121e-06
FBgn0285963	CG46339	CG46339	1.59786e-09	0.0612243	0.161	0.108	2.39678e-06
FBgn0262473	CG5490	Tl	1.7191e-09	0.091319	0.195	0.123	2.57865e-06
FBgn0261509	CG14351	haf	2.34564e-09	0.104925	0.159	0.094	3.51846e-06
FBgn0031971	CG7224	Sirup	3.46736e-09	0.0586197	0.19	0.146	5.20104e-06
FBgn0025525	CG9102	bab2	3.62133e-09	0.0969729	0.163	0.107	5.43199e-06
FBgn0000179	CG3578	bi	5.15202e-09	0.393289	0.326	0.218	7.72804e-06
FBgn0051361	CG31361	dpr17	6.17369e-09	0.166252	0.238	0.153	9.26053e-06
FBgn0001234	CR31400	lncRNA:Hsromega	8.04611e-09	2.04808	0.987	0.983	1.20692e-05
FBgn0264975	CG1634	Nrg	1.02861e-08	0.0695566	0.245	0.205	1.54291e-05
FBgn0029939	CG9650	CG9650	1.04017e-08	0.245357	0.163	0.089	1.56026e-05
FBgn0004395	CG4620	unk	1.74718e-08	0.124259	0.268	0.194	2.62078e-05
FBgn0004607	CG1449	zfh2	2.78517e-08	0.13634	0.179	0.115	4.17776e-05
FBgn0261999	CG42817	Ca-Ma2d	3.00415e-08	0.109089	0.267	0.197	4.50623e-05
FBgn0029663	CG10804	CG10804	3.31744e-08	0.797597	0.687	0.484	4.97616e-05
FBgn0004168	CG16720	5-HT1A	4.25226e-08	0.234065	0.33	0.233	6.3784e-05
FBgn0267253	CG32700	CG32700	5.02299e-08	0.233308	0.361	0.257	7.53448e-05
FBgn0261649	CG31247	tinc	5.74042e-08	0.0969516	0.202	0.13	8.61064e-05
FBgn0045038	CG7105	Proc	5.92526e-08	0.121071	0.119	0.069	8.88789e-05
FBgn0004595	CG17228	pros	6.30069e-08	7.56556	0.902	0.879	9.45104e-05
FBgn0012344	CG8348	Dh44	7.01456e-08	0.0839365	0.106	0.074	0.000105218
FBgn0262614	CG43140	pyd	7.40835e-08	0.203748	0.27	0.183	0.000111125
FBgn0051324	CG31324	CG31324	7.43069e-08	0.142034	0.232	0.139	0.00011146
FBgn0243512	CG7850	puc	9.20853e-08	0.0467446	0.168	0.127	0.000138128
FBgn0052183	CG32183	Ccn	1.10621e-07	0.106122	0.201	0.133	0.000165931
FBgn0085426	CG34397	Rgk3	1.18055e-07	0.098721	0.172	0.122	0.000177083
FBgn0051475	CG31475	CG31475	1.98728e-07	0.0625263	0.14	0.091	0.000298093
FBgn0033405	CG13954	CG13954	2.14603e-07	0.215543	0.315	0.198	0.000321905
FBgn0034897	CG11299	Sesn	2.37769e-07	0.0659422	0.138	0.096	0.000356654
FBgn0024321	CG8524	NK7.1	2.79285e-07	0.0778769	0.203	0.147	0.000418927
FBgn0000547	CG12676	ed	2.95571e-07	0.201126	0.274	0.174	0.000443356
FBgn0037015	CG13253	cmpy	4.50374e-07	0.208645	0.375	0.271	0.00067556
FBgn0051092	CG31092	LpR2	5.11087e-07	0.0375129	0.152	0.115	0.000766631
FBgn0261090	CG42333	Sytbeta	5.39624e-07	0.0969489	0.245	0.192	0.000809436
FBgn0000097	CG3166	aop	5.5162e-07	0.123793	0.243	0.161	0.00082743
FBgn0001225	CG4183	Hsp26	5.55622e-07	0.0780967	0.205	0.154	0.000833432
FBgn0261113	CG17836	Xrp1	6.52086e-07	0.104065	0.282	0.214	0.000978129
FBgn0035495	CG14989	CG14989	8.47335e-07	0.742332	0.369	0.276	0.001271
FBgn0259216	CG42316	RhoGAP102A	9.01618e-07	-0.0292465	0.081	0.101	0.00135243
FBgn0050419	CG30419	CG30419	9.33393e-07	0.116532	0.23	0.171	0.00140009
FBgn0263219	CG42330	Dscam4	9.89248e-07	0.257125	0.345	0.225	0.00148387
FBgn0004652	CG14307	fru	1.17502e-06	0.319671	0.337	0.199	0.00176252
FBgn0085370	CG34341	Pde11	1.66853e-06	0.105817	0.202	0.14	0.00250279
FBgn0040877	CG12994	CG12994	1.91644e-06	0.0534373	0.11	0.073	0.00287465
FBgn0283451	CG11491	br	1.9182e-06	0.121988	0.236	0.201	0.0028773
FBgn0031530	CG3254	Pgant2	2.07425e-06	0.124402	0.221	0.163	0.00311138
FBgn0085385	CG34356	bma	2.17579e-06	0.152639	0.316	0.246	0.00326368
FBgn0261698	CG42732	SLO2	2.46007e-06	0.140546	0.3	0.216	0.00369011
FBgn0032666	CG5758	CG5758	2.93202e-06	0.256007	0.361	0.248	0.00439802
FBgn0033159	CG17800	Dscam1	3.25288e-06	0.157159	0.322	0.233	0.00487933
FBgn0085382	CG34353	CG34353	3.29827e-06	0.113539	0.29	0.224	0.00494741
FBgn0004885	CG6863	tok	3.55691e-06	0.0756597	0.196	0.145	0.00533537
FBgn0267033	CG45477	mamo	4.12856e-06	1.40071	0.507	0.298	0.00619284
FBgn0031306	CG4577	CG4577	4.15525e-06	0.277943	0.425	0.362	0.00623287
FBgn0040823	CG14162	dpr6	4.37823e-06	0.102681	0.286	0.221	0.00656734
FBgn0263706	CG43658	CG43658	4.55777e-06	0.102786	0.208	0.147	0.00683665
FBgn0034408	CG12758	sano	5.05446e-06	0.0477641	0.106	0.067	0.00758168
FBgn0259243	CG42341	Pka-R1	5.68529e-06	0.226961	0.441	0.337	0.00852794
FBgn0031016	CG12199	kek5	5.9365e-06	0.0429635	0.142	0.105	0.00890475
FBgn0030272	CG15201	CG15201	7.09246e-06	0.108238	0.168	0.111	0.0106387
FBgn0027589	CG1688	CG1688	7.37323e-06	0.0624419	0.182	0.136	0.0110598
FBgn0264273	CG33960	Sema2b	8.46774e-06	0.186766	0.297	0.209	0.0127016
FBgn0004580	CG6702	Cbp53E	8.91997e-06	3.06095	0.726	0.495	0.01338
FBgn0053087	CG33087	LRP1	9.01981e-06	0.036233	0.126	0.096	0.0135297
FBgn0015519	CG2302	nAChRalpha3	9.51009e-06	0.162204	0.283	0.196	0.0142651
FBgn0030505	CG11172	NFAT	1.52732e-05	0.266942	0.463	0.341	0.0229098
FBgn0053517	CG33517	Dop2R	1.5304e-05	3.93105	0.931	0.896	0.0229559
FBgn0000121	CG5962	Arr2	1.60732e-05	-0.0205489	0.138	0.169	0.0241098
FBgn0052600	CG32600	dpr8	1.68613e-05	0.306957	0.497	0.372	0.025292
FBgn0085420	CG34391	DIP-delta	1.85537e-05	0.136227	0.338	0.295	0.0278306
FBgn0020269	CG10145	mspo	2.1151e-05	0.194148	0.307	0.228	0.0317265
FBgn0013733	CG18076	shot	2.38164e-05	0.116342	0.375	0.302	0.0357246
FBgn0001229	CG4190	Hsp67Bc	2.60531e-05	0.0574021	0.129	0.088	0.0390797
FBgn0033268	CG2297	Obp44a	3.32708e-05	0.266358	0.256	0.169	0.0499062
FBgn0260658	CG42541	CG42541	3.34149e-05	0.232675	0.582	0.53	0.0501223
FBgn0051191	CG31191	CG31191	3.69222e-05	0.0723481	0.144	0.094	0.0553834
FBgn0040765	CG33473	luna	3.88017e-05	0.542441	0.476	0.316	0.0582025
FBgn0040726	CG13439	dpr1	5.44011e-05	0.191178	0.326	0.238	0.0816016
FBgn0033987	CG12424	ckn	5.48739e-05	0.0786909	0.201	0.14	0.0823109
FBgn0051760	CG31760	CG31760	5.65944e-05	0.106708	0.272	0.206	0.0848916
FBgn0085399	CG34370	CG34370	6.54605e-05	0.068219	0.163	0.116	0.0981908
FBgn0250908	CG42242	beat-VII	6.90814e-05	0.152376	0.352	0.268	0.103622
FBgn0051163	CG31163	SKIP	7.69449e-05	0.385314	0.415	0.285	0.115417
FBgn0011661	CG10701	Moe	7.83895e-05	0.132718	0.293	0.21	0.117584
FBgn0024841	CG1963	Pcd	8.96126e-05	0.158232	0.374	0.303	0.134419
FBgn0011818	CG9884	oaf	8.9993e-05	0.0701499	0.18	0.134	0.134989
FBgn0038063	CG33976	Octbeta2R	9.29935e-05	0.225516	0.433	0.33	0.13949
FBgn0264339	CG43795	CG43795	9.86387e-05	-0.00885896	0.231	0.227	0.147958
FBgn0003429	CG10693	slo	0.000104479	0.47012	0.716	0.639	0.156719
FBgn0263930	CG4974	dally	0.000112006	0.169828	0.303	0.215	0.16801
FBgn0260941	CG42318	app	0.000116532	0.0958703	0.234	0.191	0.174799
FBgn0038542	CG7431	TyrR	0.000151499	0.0714118	0.128	0.102	0.227249
FBgn0263392	CG43444	Tet	0.000154123	0.399248	0.602	0.495	0.231184
FBgn0085409	CG34380	smal	0.000168802	0.0788696	0.259	0.213	0.253203
FBgn0039209	CG13624	REPTOR	0.000173641	0.128771	0.327	0.246	0.260462
FBgn0050361	CG30361	mtt	0.000175143	0.0584558	0.183	0.152	0.262715
FBgn0250869	CG42240	CG42240	0.000199257	0.022324	0.106	0.094	0.298886
FBgn0031258	CG4297	CG4297	0.000208652	0.0489844	0.11	0.067	0.312978
FBgn0033446	CG1648	CG1648	0.000209457	0.101018	0.231	0.162	0.314186
FBgn0000037	CG4356	mAChR-A	0.000223879	0.217359	0.522	0.415	0.335819
FBgn0039420	CG6154	CG6154	0.000254512	0.0960961	0.215	0.155	0.381768
FBgn0262636	CG2052	dati	0.000261408	0.0696589	0.423	0.42	0.392111
FBgn0010452	CG11280	trn	0.000270999	0.122717	0.17	0.116	0.406498
FBgn0014859	CG1864	Hr38	0.000274846	0.231584	0.402	0.329	0.412269
FBgn0037153	CG12673	olf413	0.000285875	0.140925	0.371	0.312	0.428813
FBgn0001078	CG4059	ftz-f1	0.000293764	0.121877	0.312	0.232	0.440646
FBgn0267001	CG42338	Ten-a	0.000295991	2.3377	0.901	0.773	0.443987
FBgn0051646	CG31646	DIP-theta	0.000305071	0.140181	0.217	0.161	0.457607
FBgn0028370	CG4192	kek3	0.000306487	0.0898554	0.179	0.119	0.45973
FBgn0015774	CG10521	NetB	0.000310807	0.280284	0.342	0.258	0.466211
FBgn0066101	CG31094	LpR1	0.000313273	0.094264	0.238	0.182	0.46991
FBgn0261046	CG31190	Dscam3	0.000315295	0.0267104	0.212	0.195	0.472942
FBgn0053516	CG33516	dpr3	0.000323439	0.0850756	0.183	0.135	0.485159
FBgn0259242	CG42340	CG42340	0.000331705	0.0881018	0.264	0.205	0.497557
FBgn0030913	CG6123	CG6123	0.000354771	0.298859	0.456	0.399	0.532157
FBgn0000659	CG10002	fkh	0.000374086	0.2421	0.216	0.157	0.561129
FBgn0259245	CG42343	DIP-beta	0.000434957	0.0837329	0.15	0.109	0.652436
FBgn0001230	CG5436	Hsp68	0.000477901	0.0435342	0.101	0.073	0.716851
FBgn0003423	CG1417	slgA	0.000487225	0.29991	0.722	0.7	0.730838
FBgn0264386	CG15899	Ca-alpha1T	0.000510432	0.951599	0.635	0.511	0.765649
FBgn0027608	CG2082	CG2082	0.000514322	0.0834398	0.328	0.286	0.771483
FBgn0085413	CG34384	CG34384	0.000544742	0.147539	0.305	0.223	0.817114
FBgn0051619	CG31619	nolo	0.000567217	0.137169	0.295	0.228	0.850826
FBgn0027654	CG2239	jdp	0.000621429	1.0023	0.806	0.754	0.932143
FBgn0034725	CG6044	CG6044	0.000621737	0.0970048	0.327	0.263	0.932606
FBgn0004882	CG10868	orb	0.000688836	0.0532314	0.159	0.125	1
FBgn0261588	CG42698	pdm3	0.000689592	0.152519	0.274	0.228	1
FBgn0261258	CG6014	rgn	0.0006945	0.0697417	0.196	0.148	1
FBgn0026428	CG6170	HDAC6	0.0007489	0.0302555	0.105	0.077	1
FBgn0035173	CG13907	CG13907	0.000829673	0.0485772	0.124	0.079	1
FBgn0261556	CG42674	CG42674	0.000834646	0.188616	0.295	0.218	1
FBgn0033403	CG13739	CG13739	0.000873776	0.327036	0.377	0.25	1
FBgn0261285	CG5629	Ppcs	0.00087618	0.114701	0.251	0.195	1
FBgn0000303	CG12345	ChAT	0.000884701	0.107526	0.201	0.126	1
FBgn0032629	CG15138	beat-IIIc	0.000908165	0.342428	0.37	0.261	1
FBgn0026411	CG11354	Lim1	0.000942839	0.233438	0.187	0.137	1
FBgn0052204	CG32204	CG32204	0.000977148	0.0773699	0.159	0.107	1
FBgn0264908	CG44099	pHCl-1	0.00101871	0.0747391	0.287	0.234	1
FBgn0001297	CG33956	kay	0.0010415	0.027306	0.118	0.095	1
FBgn0262593	CG43128	Shab	0.00106015	0.202864	0.441	0.343	1
FBgn0023534	CG17778	CG17778	0.0012458	0.0995535	0.205	0.153	1
FBgn0030174	CG15312	CG15312	0.00127618	0.0836092	0.239	0.19	1
FBgn0086359	CG3953	Invadolysin	0.00130545	0.0253506	0.177	0.162	1
FBgn0266429	CG2872	AstA-R1	0.00151724	0.0472552	0.11	0.079	1
FBgn0053639	CG33639	CG33639	0.00165661	0.0670009	0.114	0.071	1
FBgn0013718	CG33991	nuf	0.00171405	0.0468489	0.113	0.073	1
FBgn0085412	CG34383	kmr	0.00183567	0.146725	0.334	0.267	1
FBgn0036454	CG17839	CG17839	0.00193435	0.0774705	0.179	0.132	1
FBgn0004102	CG12154	oc	0.00198206	0.0709228	0.141	0.116	1
FBgn0261988	CG17998	Gprk2	0.0019993	0.363617	0.477	0.316	1
FBgn0000287	CG4881	salr	0.00212022	0.114683	0.142	0.114	1
FBgn0052647	CG32647	CG32647	0.00212108	0.09331	0.245	0.169	1
FBgn0015777	CG9261	nrv2	0.00216078	0.0728145	0.172	0.121	1
FBgn0265595	CG44422	CG44422	0.00217906	0.279348	0.374	0.277	1
FBgn0004198	CG11387	ct	0.00254022	0.773595	0.311	0.164	1
FBgn0086680	CG10037	vvl	0.00260557	0.138232	0.137	0.092	1
FBgn0053696	CG33696	CNMaR	0.0026616	0.0943503	0.128	0.089	1
FBgn0259111	CG42253	Ndae1	0.00267484	0.0570138	0.178	0.13	1
FBgn0039770	CG15537	CG15537	0.00269171	0.261082	0.124	0.093	1
FBgn0264895	CG44086	RapGAP1	0.00271723	0.480477	0.461	0.344	1
FBgn0031897	CG13784	CG13784	0.0028197	0.0839735	0.278	0.226	1
FBgn0014184	CG16747	Oda	0.00308462	0.559941	0.733	0.673	1
FBgn0262782	CG5362	Mdh1	0.0032887	0.0582323	0.211	0.166	1
FBgn0262508	CG43078	CG43078	0.00358756	0.0372501	0.115	0.08	1
FBgn0260462	CG12163	CG12163	0.00384225	0.0575831	0.179	0.131	1
FBgn0019650	CG11186	toy	0.00394889	0.111406	0.216	0.168	1
FBgn0284245	CG8280	eEF1alpha1	0.00398463	0.172692	0.371	0.274	1
FBgn0011582	CG9652	Dop1R1	0.00407552	0.074577	0.251	0.212	1
FBgn0266851	CR45312	lncRNA:CR45312	0.00422818	-0.0112364	0.197	0.194	1
FBgn0263994	CG43737	CG43737	0.00426091	0.46229	0.592	0.428	1
FBgn0030574	CG9413	sbm	0.00431521	0.0380794	0.206	0.179	1
FBgn0036043	CG8177	CG8177	0.00449008	0.116566	0.353	0.296	1
FBgn0031294	CG31795	IA-2	0.00467454	9.60162	0.994	0.996	1
FBgn0024944	CG3856	Oamb	0.00514584	0.0447938	0.132	0.096	1
FBgn0267910	CR34335	lncRNA:CR34335	0.00520792	17.4014	0.995	0.919	1
FBgn0013981	CG3379	His4r	0.00523436	1.00965	0.959	0.955	1
FBgn0031770	CG13995	CG13995	0.0057974	0.0870851	0.258	0.209	1
FBgn0261788	CG42734	Ank2	0.00581911	1.17034	0.829	0.754	1
FBgn0004449	CG5723	Ten-m	0.00585732	0.11219	0.39	0.339	1
FBgn0010113	CG15532	hdc	0.00593057	1.00444	0.728	0.612	1
FBgn0085414	CG34385	dpr12	0.00608034	0.19011	0.476	0.406	1
FBgn0034286	CG33996	dpr13	0.00695339	0.478302	0.469	0.342	1
FBgn0028369	CG3653	kirre	0.00719523	0.152582	0.336	0.253	1
FBgn0264490	CG18389	Eip93F	0.00745181	0.430001	0.408	0.284	1
FBgn0016797	CG9739	fz2	0.00804515	0.154046	0.312	0.243	1
FBgn0033192	CG2105	Corin	0.00832733	0.331141	0.553	0.475	1
FBgn0000064	CG6058	Ald1	0.00835919	0.756137	0.796	0.725	1
FBgn0037546	CG7918	mAChR-B	0.00913277	0.0123378	0.116	0.104	1
FBgn0037941	CG12594	CG12594	0.00924706	0.139647	0.278	0.228	1
FBgn0011224	CG31000	heph	0.0094888	1.12682	0.651	0.587	1
FBgn0261549	CG42667	rdgA	0.00951534	0.235678	0.426	0.339	1
FBgn0051774	CG31774	fred	0.0100054	0.0862927	0.233	0.188	1
FBgn0265598	CG44425	Bx	0.0100141	0.138657	0.192	0.139	1
FBgn0052406	CG32406	PVRAP	0.0103141	0.0622803	0.173	0.134	1
FBgn0038282	CG33485	dpr9	0.0103947	0.478339	0.5	0.375	1
FBgn0039349	CG4685	Ssadh	0.0104771	0.0180327	0.122	0.105	1
FBgn0027598	CG31012	cindr	0.0104883	0.506668	0.574	0.407	1
FBgn0033791	CG3915	Drl-2	0.0105877	0.0471288	0.187	0.167	1
FBgn0001085	CG17697	fz	0.0105901	0.102418	0.245	0.19	1
FBgn0038980	CG6919	Octbeta1R	0.010737	0.0989629	0.194	0.145	1
FBgn0261804	CG42750	CG42750	0.0109061	0.211936	0.399	0.314	1
FBgn0032048	CG13094	Dh31	0.0110644	0.315339	0.116	0.088	1
FBgn0038494	CG4135	beat-IIb	0.0114138	0.0123378	0.133	0.122	1
FBgn0037913	CG6783	fabp	0.011546	0.0482277	0.188	0.149	1
FBgn0260660	CG42543	Mp	0.0132481	0.15048	0.383	0.32	1
FBgn0266756	CG44012	btsz	0.0144344	0.0273471	0.103	0.08	1
FBgn0043364	CG4427	cbt	0.0146322	0.0258197	0.148	0.125	1
FBgn0264815	CG44007	Pde1c	0.0160202	0.147761	0.338	0.261	1
FBgn0263220	CG43388	Hk	0.016668	0.679659	0.714	0.588	1
FBgn0025682	CG9148	scf	0.0166838	0.0187451	0.105	0.089	1
FBgn0263131	CG43373	CG43373	0.0167095	0.0568744	0.102	0.069	1
FBgn0028645	CG7644	beat-Ib	0.0167641	0.102333	0.302	0.263	1
FBgn0259170	CG42275	alpha-Man-Ia	0.0168866	0.0580292	0.201	0.159	1
FBgn0052506	CG32506	CG32506	0.0173388	0.078015	0.273	0.223	1
FBgn0013467	CG18285	igl	0.0173489	0.582269	0.642	0.537	1
FBgn0010434	CG11949	cora	0.017607	0.0580084	0.215	0.172	1
FBgn0013686	CR34094	mt:lrRNA	0.0185592	-0.521394	0.948	0.951	1
FBgn0044328	CG32052	CG32052	0.0202695	0.17133	0.325	0.259	1
FBgn0052017	CG32017	CG32017	0.0207877	0.410007	0.801	0.792	1
FBgn0053143	CG33143	CG33143	0.0211884	0.0362257	0.266	0.238	1
FBgn0004369	CG11516	Ptp99A	0.0212152	0.880629	0.737	0.578	1
FBgn0033438	CG1794	Mmp2	0.0219248	0.115673	0.268	0.228	1
FBgn0019985	CG11144	mGluR	0.0220128	0.192819	0.386	0.326	1
FBgn0025885	CG11143	Inos	0.0222026	0.0446317	0.13	0.093	1
FBgn0038321	CG6218	CG6218	0.0233018	0.0398326	0.124	0.091	1
FBgn0050158	CG30158	CG30158	0.0238787	0.0258003	0.123	0.108	1
FBgn0264442	CG43860	ab	0.023887	0.123074	0.31	0.263	1
FBgn0003651	CG11502	svp	0.0253051	0.0501013	0.101	0.081	1
FBgn0085447	CG34418	sif	0.0255175	1.27483	0.743	0.524	1
FBgn0035756	CG32381	unc-13-4A	0.0257112	0.177386	0.366	0.302	1
FBgn0052206	CG32206	CG32206	0.02629	0.0696379	0.248	0.209	1
FBgn0264503	CG43902	CG43902	0.0275465	0.217107	0.257	0.179	1
FBgn0085407	CG34378	Pvf3	0.0293896	0.532705	0.511	0.398	1
FBgn0034636	CG10440	twz	0.0303877	0.0312297	0.11	0.087	1
FBgn0260442	CG6831	rhea	0.031412	0.0188652	0.148	0.123	1
FBgn0037676	CG8861	CG8861	0.0358917	0.114148	0.273	0.219	1
FBgn0030412	CG17762	Tomosyn	0.0373958	0.611375	0.718	0.609	1
FBgn0028496	CG30116	CG30116	0.0392256	0.270475	0.44	0.351	1
FBgn0031414	CG33955	eys	0.0400307	0.421765	0.46	0.367	1
FBgn0035041	CG13594	CG13594	0.0403237	0.036721	0.121	0.094	1
FBgn0002643	CG8118	mam	0.0407367	0.0660609	0.213	0.167	1
FBgn0015400	CG4977	kek2	0.0416075	0.144991	0.382	0.324	1
FBgn0037874	CG4800	Tctp	0.0418025	0.0711945	0.385	0.359	1
FBgn0038498	CG14334	beat-IIa	0.0439229	0.211326	0.36	0.291	1
FBgn0085384	CG34355	CG34355	0.0470192	0.228068	0.556	0.525	1
FBgn0005636	CG3385	nvy	0.0489795	0.031962	0.126	0.103	1
FBgn0029814	CG15765	CG15765	0.0515358	0.290491	0.524	0.434	1
FBgn0052432	CG32432	CG32432	0.0537692	0.0313697	0.185	0.155	1
FBgn0266137	CG18741	Dop1R2	0.0547304	0.0436963	0.114	0.086	1
FBgn0027339	CG11352	jim	0.0570552	1.34346	0.942	0.955	1
FBgn0038929	CG13408	CG13408	0.0571782	0.0651476	0.135	0.107	1
FBgn0031736	CG11030	CG11030	0.0577823	0.00996836	0.3	0.302	1
FBgn0011666	CG5099	msi	0.0582957	0.784525	0.604	0.41	1
FBgn0010412	CG4464	RpS19a	0.0596998	0.0623718	0.351	0.313	1
FBgn0260793	CG42573	2mit	0.0609493	0.0342329	0.243	0.224	1
FBgn0083991	CG34155	CG34155	0.0612929	0.0267524	0.165	0.146	1
FBgn0037521	CG2993	CG2993	0.0616762	0.0790885	0.351	0.308	1
FBgn0039816	CG11317	CG11317	0.0624318	0.0551189	0.212	0.184	1
FBgn0262160	CG9932	CG9932	0.0639517	0.181236	0.303	0.219	1
FBgn0010473	CG15427	tutl	0.0661957	0.43824	0.667	0.587	1
FBgn0000108	CG7727	Appl	0.0668695	1.59002	0.903	0.863	1
FBgn0004509	CG10772	Fur1	0.0670449	0.076084	0.245	0.203	1
FBgn0285944	CG9907	para	0.0697102	1.16645	0.839	0.781	1
FBgn0028875	CG32975	nAChRalpha5	0.071726	0.770122	0.828	0.761	1
FBgn0010300	CG10719	brat	0.0730701	0.163754	0.478	0.439	1
FBgn0033250	CG14762	CG14762	0.07322	0.120356	0.222	0.152	1
FBgn0026160	CG7958	tna	0.0746144	0.499407	0.534	0.381	1
FBgn0003380	CG12348	Sh	0.076087	1.8884	0.943	0.942	1
FBgn0011656	CG1429	Mef2	0.0769885	0.191281	0.329	0.233	1
FBgn0250910	CG42244	Octbeta3R	0.0771035	0.0519501	0.173	0.135	1
FBgn0036144	CG6207	GlcAT-P	0.077163	0.114776	0.34	0.297	1
FBgn0035816	CG13685	CG13685	0.0806594	0.0583953	0.202	0.155	1
FBgn0000116	CG32031	Argk	0.0829638	0.533757	0.764	0.71	1
FBgn0263980	CG43729	Stacl	0.0833593	0.381476	0.632	0.572	1
FBgn0266100	CG44837	CG44837	0.0842164	0.0675675	0.171	0.133	1
FBgn0261836	CG42768	Msp300	0.0847694	1.4662	0.838	0.753	1
FBgn0035032	CG4692	ATPsynF	0.0849753	0.529405	0.773	0.71	1
FBgn0003326	CG17579	sca	0.0874332	0.0901186	0.184	0.139	1
FBgn0030723	CG14948	dpr18	0.0881379	0.0331002	0.142	0.121	1
FBgn0267668	CR46006	lncRNA:CR46006	0.0888031	0.0427391	0.141	0.112	1
FBgn0266871	CR45332	lncRNA:CR45332	0.0898481	-0.000779316	0.139	0.139	1
FBgn0085753	CR40596	28SrRNA-Psi:CR40596	0.0947403	0.0186805	0.169	0.156	1
FBgn0033544	CG7220	CG7220	0.100736	0.05697	0.245	0.203	1
FBgn0065099	CR33925	snRNA:7SK	0.102681	-0.165057	0.883	0.841	1
FBgn0259212	CG42312	cno	0.103444	0.0415613	0.117	0.082	1
FBgn0265487	CG33197	mbl	0.105607	1.11322	0.616	0.495	1
FBgn0028481	CG4341	CG4341	0.106097	0.0616847	0.27	0.231	1
FBgn0085383	CG34354	CG34354	0.109316	0.098347	0.3	0.26	1
FBgn0036927	CG7433	Gabat	0.111163	0.0364907	0.255	0.23	1
FBgn0265182	CG44247	CG44247	0.112064	0.109162	0.348	0.307	1
FBgn0085434	CG34405	NaCP60E	0.113614	0.574164	0.684	0.561	1
FBgn0052677	CG32677	X11Lbeta	0.113663	0.240159	0.45	0.353	1
FBgn0265194	CG44240	Trpm	0.120731	0.0232978	0.146	0.135	1
FBgn0030090	CG12664	fend	0.124056	0.285118	0.504	0.398	1
FBgn0035499	CG14996	Chd64	0.128208	0.0278933	0.165	0.147	1
FBgn0266801	CG45263	CG45263	0.136056	0.206762	0.435	0.382	1
FBgn0003274	CG4918	RpLP2	0.136144	0.260225	0.656	0.626	1
FBgn0261871	CG33507	dpr2	0.1371	0.0396885	0.147	0.121	1
FBgn0038653	CG18208	Octalpha2R	0.137413	0.187471	0.344	0.277	1
FBgn0000042	CG4027	Act5C	0.137911	0.543689	0.796	0.748	1
FBgn0263873	CG43720	sick	0.139546	0.0182765	0.125	0.109	1
FBgn0039089	CG10152	beat-IV	0.142698	0.0403354	0.203	0.186	1
FBgn0260943	CG32169	Rbp6	0.144345	3.12126	0.886	0.843	1
FBgn0053202	CG33202	dpr11	0.146293	0.0407372	0.286	0.269	1
FBgn0001186	CG3001	Hex-A	0.147131	1.83668	0.772	0.51	1
FBgn0010415	CG10497	Sdc	0.150678	0.423901	0.676	0.618	1
FBgn0263397	CG8585	Ih	0.152112	1.56707	0.833	0.729	1
FBgn0039647	CG14509	jus	0.155221	0.222044	0.344	0.257	1
FBgn0086677	CG30040	jeb	0.155844	0.568517	0.565	0.435	1
FBgn0038084	CG14390	beat-Vc	0.155974	0.027632	0.101	0.079	1
FBgn0040397	CG3655	CG3655	0.15657	0.0605728	0.151	0.114	1
FBgn0264001	CG43744	bru3	0.157212	1.46138	0.876	0.849	1
FBgn0003435	CG9218	sm	0.157374	1.66407	0.918	0.89	1
FBgn0039584	CG14064	beat-VI	0.161742	0.0451508	0.263	0.239	1
FBgn0034138	CG8332	RpS15	0.163069	0.762962	0.882	0.863	1
FBgn0085390	CG34361	Dgk	0.167197	0.036986	0.11	0.08	1
FBgn0000024	CG17907	Ace	0.167797	0.337197	0.457	0.354	1
FBgn0004910	CG15855	Eip63F-1	0.168669	0.0103012	0.169	0.155	1
FBgn0038237	CG8279	Pde6	0.169439	0.301948	0.52	0.436	1
FBgn0042696	CG2380	NfI	0.169463	0.0661625	0.22	0.172	1
FBgn0259213	CG42313	side-II	0.169713	0.131854	0.381	0.335	1
FBgn0036935	CG14186	CG14186	0.170876	0.0168272	0.211	0.19	1
FBgn0085395	CG34366	Shawl	0.172088	0.0511984	0.15	0.122	1
FBgn0264606	CG43955	Fife	0.173583	0.155465	0.526	0.515	1
FBgn0263995	CG43738	cpo	0.184872	0.484794	0.616	0.53	1
FBgn0261597	CG10305	RpS26	0.187564	0.309287	0.756	0.79	1
FBgn0000633	CG17716	CG17716	0.188066	0.681361	0.553	0.406	1
FBgn0029123	CG18024	SoxN	0.188866	0.295633	0.326	0.243	1
FBgn0086778	CG32538	nAChRalpha7	0.193503	0.388532	0.575	0.474	1
FBgn0001091	CG12055	Gapdh1	0.202615	0.10959	0.388	0.34	1
FBgn0085432	CG34403	pan	0.20574	0.369572	0.739	0.706	1
FBgn0264006	CG43749	dysc	0.206251	0.646495	0.81	0.748	1
FBgn0261928	CG42795	CG42795	0.2064	0.116893	0.32	0.268	1
FBgn0022382	CG15862	Pka-R2	0.207642	0.23908	0.448	0.372	1
FBgn0262509	CG43079	nrm	0.210774	0.0648992	0.261	0.216	1
FBgn0002593	CG4087	RpLP1	0.212537	0.512205	0.77	0.71	1
FBgn0010313	CG2530	corto	0.214341	0.184706	0.429	0.346	1
FBgn0085400	CG34371	side-V	0.217195	0.0434285	0.184	0.152	1
FBgn0010411	CG8900	RpS18	0.219423	0.329038	0.837	0.857	1
FBgn0083975	CG34139	Nlg4	0.225316	0.0468656	0.182	0.147	1
FBgn0261574	CG7749	kug	0.226844	0.0307796	0.177	0.16	1
FBgn0265052	CG44167	St3	0.228517	0.0276902	0.166	0.142	1
FBgn0041707	CG1168	7B2	0.228861	0.571416	0.89	0.845	1
FBgn0004858	CG4220	elB	0.231728	0.0641706	0.2	0.159	1
FBgn0000535	CG10952	eag	0.232892	0.0909881	0.284	0.236	1
FBgn0034978	CG3257	CG3257	0.235169	0.019881	0.17	0.151	1
FBgn0267336	CG34360	Glut4EF	0.238547	1.06279	0.813	0.73	1
FBgn0033108	CG15236	CG15236	0.24401	0.119893	0.387	0.355	1
FBgn0053179	CG33179	beat-IIIb	0.250084	0.0578372	0.312	0.287	1
FBgn0260003	CG34157	Dys	0.251731	0.0426154	0.18	0.156	1
FBgn0050089	CG30089	CG30089	0.257593	0.0368208	0.158	0.133	1
FBgn0284243	CG9277	betaTub56D	0.260334	0.320055	0.472	0.353	1
FBgn0004242	CG3139	Syt1	0.262573	1.0208	0.883	0.867	1
FBgn0259171	CG42276	Pde9	0.262926	0.555352	0.611	0.527	1
FBgn0028644	CG4838	beat-Ic	0.267094	0.599724	0.466	0.308	1
FBgn0013973	CG1470	Gycbeta100B	0.269288	0.0138398	0.181	0.178	1
FBgn0020379	CG6312	Rfx	0.271841	0.0216914	0.139	0.128	1
FBgn0262018	CG42829	CadN2	0.273596	0.0490015	0.172	0.135	1
FBgn0029761	CG10706	SK	0.275139	0.456099	0.644	0.559	1
FBgn0032901	CG9339	sky	0.276784	0.153732	0.454	0.395	1
FBgn0262869	CG43224	Gfrl	0.278438	0.194812	0.381	0.315	1
FBgn0031697	CG14024	CG14024	0.279792	0.0477392	0.196	0.166	1
FBgn0286778	CG46385	CG46385	0.280897	0.26315	0.491	0.419	1
FBgn0262738	CG3620	norpA	0.282335	0.229862	0.505	0.44	1
FBgn0000273	CG4379	Pka-C1	0.284933	0.660367	0.659	0.548	1
FBgn0004514	CG7485	Oct-TyrR	0.291774	0.0318794	0.15	0.129	1
FBgn0083963	CG34127	Nlg3	0.295578	0.233658	0.538	0.467	1
FBgn0004611	CG4574	Plc21C	0.302134	0.320029	0.535	0.443	1
FBgn0260657	CG42540	CG42540	0.302693	0.396905	0.723	0.667	1
FBgn0270928	CG32848	VAChT	0.308956	0.145937	0.233	0.145	1
FBgn0004880	CG1130	scrt	0.318026	0.479893	0.786	0.75	1
FBgn0261089	CG5559	Sytalpha	0.322613	0.0279349	0.14	0.122	1
FBgn0259234	CG42332	Camta	0.330882	0.02718	0.201	0.179	1
FBgn0032840	CG13968	sNPF	0.341218	0.287573	0.206	0.171	1
FBgn0285952	CG3186	eEF5	0.349463	0.120612	0.378	0.324	1
FBgn0028888	CG4168	CG4168	0.351006	0.0355413	0.13	0.1	1
FBgn0031835	CG11319	CG11319	0.355423	0.0785359	0.346	0.316	1
FBgn0014163	CG4609	fax	0.357119	1.63093	0.83	0.71	1
FBgn0038246	CG14853	CG14853	0.357605	0.0423919	0.184	0.153	1
FBgn0036494	CG7250	Toll-6	0.362901	0.463887	0.459	0.325	1
FBgn0025382	CG14791	Rab27	0.364793	0.000338526	0.152	0.155	1
FBgn0000635	CG3665	Fas2	0.367786	0.481015	0.388	0.223	1
FBgn0031374	CG7337	Wdr62	0.370825	0.443226	0.53	0.343	1
FBgn0033368	CG13743	CG13743	0.372686	0.0552833	0.211	0.181	1
FBgn0032797	CG10186	Hasp	0.375142	0.846719	0.847	0.818	1
FBgn0036934	CG7395	sNPF-R	0.380249	0.0161415	0.106	0.094	1
FBgn0261552	CG42670	ps	0.386779	1.17978	0.897	0.87	1
FBgn0264574	CG43946	Glut1	0.391504	0.0810998	0.352	0.314	1
FBgn0016061	CG31062	side	0.393096	0.282671	0.49	0.418	1
FBgn0035171	CG12502	CG12502	0.393891	-0.0015721	0.143	0.144	1
FBgn0001233	CG1242	Hsp83	0.395883	0.202977	0.663	0.632	1
FBgn0259108	CG34387	futsch	0.401644	2.36225	0.936	0.899	1
FBgn0039064	CG4467	CG4467	0.403512	0.298265	0.578	0.487	1
FBgn0000422	CG10697	Ddc	0.406756	0.157826	0.524	0.476	1
FBgn0000114	CG31762	bru1	0.409429	0.0285466	0.112	0.088	1
FBgn0085421	CG34392	Epac	0.420042	0.0523121	0.224	0.199	1
FBgn0038156	CG14372	side-IV	0.420838	0.0105089	0.109	0.097	1
FBgn0004244	CG10537	Rdl	0.42253	1.67321	0.953	0.935	1
FBgn0266418	CG45058	wake	0.42663	0.0423716	0.171	0.141	1
FBgn0015399	CG12283	kek1	0.429024	0.239948	0.489	0.418	1
FBgn0036165	CG7533	chrb	0.429318	0.650363	0.72	0.669	1
FBgn0037525	CG17816	CG17816	0.449462	0.344306	0.557	0.458	1
FBgn0053147	CG33147	Hs3st-A	0.452057	0.321398	0.459	0.341	1
FBgn0259789	CG12701	zld	0.453103	0.0703508	0.198	0.175	1
FBgn0000575	CG1007	emc	0.453803	0.094458	0.388	0.363	1
FBgn0010114	CG2040	hig	0.453895	0.427459	0.556	0.484	1
FBgn0039617	CG14521	DIP-gamma	0.456995	0.014652	0.2	0.202	1
FBgn0020907	CG14904	Scp2	0.471691	0.0575569	0.17	0.156	1
FBgn0264087	CG43756	Slob	0.474669	0.0479419	0.209	0.178	1
FBgn0263289	CG43398	scrib	0.478307	0.00603297	0.151	0.145	1
FBgn0038839	CG10830	Ktl	0.482298	0.031584	0.319	0.317	1
FBgn0085391	CG34362	trv	0.483414	0.934398	0.641	0.521	1
FBgn0287186	CG17594	scro	0.48627	0.0287678	0.131	0.113	1
FBgn0285948	CG15442	RpL27A	0.498197	0.221059	0.762	0.765	1
FBgn0019643	CG3318	AANAT1	0.503014	0.0104845	0.176	0.18	1
FBgn0264000	CG43743	GluRIB	0.509227	0.394112	0.479	0.383	1
FBgn0013433	CG4846	beat-Ia	0.512397	0.0497098	0.197	0.177	1
FBgn0034753	CG2852	CG2852	0.523048	0.18917	0.544	0.485	1
FBgn0085410	CG34381	TrissinR	0.531255	0.0368632	0.108	0.092	1
FBgn0038087	CG10134	beat-Va	0.53531	0.0247831	0.137	0.116	1
FBgn0032400	CG6770	CG6770	0.538235	0.923019	0.777	0.643	1
FBgn0028704	CG18660	Nckx30C	0.543185	0.400224	0.696	0.656	1
FBgn0032151	CG4128	nAChRalpha6	0.545131	1.81314	0.849	0.753	1
FBgn0005775	CG7503	Con	0.554291	0.977146	0.6	0.45	1
FBgn0259821	CG42402	CG42402	0.560548	0.143643	0.418	0.38	1
FBgn0000036	CG5610	nAChRalpha1	0.571895	0.206602	0.445	0.387	1
FBgn0010263	CG3151	Rbp9	0.575134	0.372259	0.603	0.536	1
FBgn0052264	CG32264	CG32264	0.579898	0.774837	0.792	0.742	1
FBgn0265002	CG44153	CG44153	0.583028	0.0414113	0.238	0.213	1
FBgn0003165	CG9755	pum	0.584824	0.794584	0.849	0.775	1
FBgn0052062	CG32062	Rbfox1	0.587003	1.56051	0.86	0.751	1
FBgn0066084	CG30425	RpL41	0.588225	3.70752	0.9	0.741	1
FBgn0264794	CR44024	lncRNA:CR44024	0.588965	0.0742487	0.313	0.29	1
FBgn0261244	CG33174	inaE	0.595211	0.326585	0.478	0.337	1
FBgn0265597	CG44424	rad	0.600498	0.835709	0.66	0.567	1
FBgn0053543	CG33543	CG33543	0.610856	0.489586	0.444	0.338	1
FBgn0266377	CG45019	Pde8	0.61782	0.0173175	0.181	0.178	1
FBgn0031632	CG15628	CG15628	0.622567	0.209794	0.511	0.443	1
FBgn0029897	CG3203	RpL17	0.62493	0.383925	0.659	0.603	1
FBgn0023179	CG6438	amon	0.629372	0.319358	0.502	0.407	1
FBgn0261262	CG42613	CG42613	0.639863	0.941438	0.706	0.563	1
FBgn0035092	CG3441	Nplp1	0.6446	0.0511751	0.377	0.376	1
FBgn0051665	CG31665	wry	0.649157	0.54605	0.539	0.423	1
FBgn0085387	CG34358	shakB	0.655742	0.312196	0.548	0.463	1
FBgn0005771	CG4491	noc	0.658102	0.0389973	0.147	0.123	1
FBgn0259244	CG42342	CG42342	0.659163	0.294445	0.479	0.407	1
FBgn0040297	CG9256	Nhe2	0.667582	0.0299706	0.102	0.08	1
FBgn0086758	CG31666	chinmo	0.671062	0.455556	0.734	0.658	1
FBgn0034731	CG10384	CG10384	0.672373	0.00314443	0.154	0.148	1
FBgn0023095	CG11282	caps	0.672785	0.00463024	0.137	0.132	1
FBgn0032833	CG10664	COX4	0.679554	0.358257	0.784	0.775	1
FBgn0033484	CG2269	CG2269	0.680454	2.39767	0.909	0.872	1
FBgn0267579	CR45919	lncRNA:CR45919	0.681502	0.0222603	0.165	0.15	1
FBgn0013688	CR34096	mt:srRNA	0.681503	0.0241298	0.182	0.157	1
FBgn0083949	CG34113	side-III	0.683365	0.466827	0.504	0.39	1
FBgn0264308	CG43778	CG43778	0.689088	0.119434	0.336	0.29	1
FBgn0003360	CG16944	sesB	0.692462	0.986369	0.865	0.837	1
FBgn0051221	CG31221	CG31221	0.6999	1.85499	0.693	0.484	1
FBgn0262737	CG7437	mub	0.701268	0.830336	0.735	0.696	1
FBgn0267252	CG3694	Ggamma30A	0.704772	2.04096	0.905	0.897	1
FBgn0041094	CG7590	scyl	0.713353	0.291931	0.453	0.357	1
FBgn0015229	CG6575	glec	0.716728	0.446099	0.443	0.255	1
FBgn0263353	CG11000	CG11000	0.720273	0.43547	0.568	0.442	1
FBgn0083950	CG34114	side-VI	0.720308	0.42482	0.487	0.362	1
FBgn0003091	CG6622	Pkc53E	0.735951	0.643419	0.563	0.4	1
FBgn0036844	CG14080	Mkp3	0.736205	0.424431	0.56	0.419	1
FBgn0030897	CG5744	Frq1	0.739054	0.885254	0.65	0.486	1
FBgn0001235	CG17117	hth	0.745808	0.505291	0.484	0.378	1
FBgn0037956	CG6959	CG6959	0.775734	0.0182977	0.102	0.088	1
FBgn0265296	CG42256	Dscam2	0.790599	0.778245	0.734	0.658	1
FBgn0013576	CG32464	mtd	0.792651	0.667652	0.755	0.679	1
FBgn0017590	CG6669	klg	0.797372	0.3386	0.559	0.477	1
FBgn0004516	CG14994	Gad1	0.801068	0.0707215	0.108	0.069	1
FBgn0002868	CG9470	MtnA	0.807643	0.372772	0.384	0.211	1
FBgn0015609	CG7100	CadN	0.811055	0.243277	0.581	0.521	1
FBgn0038826	CG17838	Syp	0.814293	0.308255	0.518	0.413	1
FBgn0013954	CG11001	Fkbp12	0.819896	0.236952	0.565	0.5	1
FBgn0001124	CG8430	Got1	0.8259	0.0202093	0.106	0.091	1
FBgn0263257	CG43395	Cngl	0.859536	1.27138	0.79	0.692	1
FBgn0027356	CG8604	Amph	0.863775	0.0263673	0.184	0.164	1
FBgn0051721	CG31721	Trim9	0.866197	0.0169957	0.112	0.1	1
FBgn0024963	CG7535	GluClalpha	0.880084	0.759897	0.702	0.594	1
FBgn0041605	CG32490	cpx	0.882336	1.37452	0.915	0.885	1
FBgn0024189	CG33141	sns	0.893823	0.0285638	0.175	0.154	1
FBgn0011828	CG12002	Pxn	0.907624	0.00692962	0.103	0.095	1
FBgn0033196	CG1358	CG1358	0.914844	0.0137013	0.104	0.091	1
FBgn0039054	CG13830	Cow	0.918867	0.218529	0.551	0.506	1
FBgn0031424	CG9887	VGlut	0.924536	1.94193	0.947	0.949	1
FBgn0039380	CG5890	CG5890	0.952317	0.0561532	0.284	0.254	1
FBgn0041097	CG5423	robo3	0.973534	0.0185383	0.164	0.159	1
FBgn0039346	CG5079	CG5079	0.974925	0.0179505	0.133	0.123	1
FBgn0085419	CG34390	Rgk2	0.990561	0.017034	0.144	0.138	1

## Sheet: Male_C1
FlyBaseID	GeneID	Gene symbol	p_val	avg_diff	pct.1	pct.2	p_val_adj
FBgn0019660	CR32665	lncRNA:roX2	6.70162e-194	-1.11399	0.003	0.54	1.00524e-190
FBgn0004047	CG11129	Yp3	3.95911e-120	0.210718	0.166	0.001	5.93866e-117
FBgn0035495	CG14989	CG14989	1.32206e-54	6.68847	1	1	1.98308e-51
FBgn0267519	CR45859	28SrRNA-Psi:CR45859	1.86513e-45	-0.069952	0.06	0.116	2.79769e-42
FBgn0087002	CG11064	apolpp	4.52064e-40	0.151755	0.191	0.07	6.78096e-37
FBgn0058469	CR40469	lncRNA:CR40469	2.10838e-34	0.133433	0.168	0.063	3.16256e-31
FBgn0260429	CG42524	CG42524	1.93417e-30	0.243014	0.299	0.144	2.90125e-27
FBgn0050115	CG30115	GEFmeso	1.15731e-28	0.141155	0.18	0.078	1.73596e-25
FBgn0267431	CG45784	Myo81F	1.83498e-23	0.0948039	0.167	0.093	2.75247e-20
FBgn0250867	CG42238	CG42238	4.76329e-21	0.223206	0.322	0.164	7.14494e-18
FBgn0030258	CG1552	CG1552	2.88413e-20	0.0800875	0.105	0.037	4.32619e-17
FBgn0285926	CG1691	Imp	1.26575e-18	0.689878	0.421	0.215	1.89862e-15
FBgn0083228	CG5907	Frq2	5.28098e-18	0.55164	0.483	0.247	7.92147e-15
FBgn0036821	CG3961	CG3961	1.12524e-17	0.211814	0.251	0.138	1.68786e-14
FBgn0002543	CG5481	robo2	1.17915e-17	0.164122	0.163	0.073	1.76873e-14
FBgn0029768	CG16752	SPR	1.38099e-17	0.295698	0.27	0.129	2.07148e-14
FBgn0037963	CG6977	Cad87A	1.82967e-17	0.227946	0.279	0.16	2.74451e-14
FBgn0004595	CG17228	pros	1.96578e-16	4.77163	0.856	0.823	2.94867e-13
FBgn0263049	CR43344	lncRNA:let7C	5.47092e-16	0.058375	0.108	0.055	8.20638e-13
FBgn0052982	CG32982	CG32982	1.37691e-15	0.208265	0.273	0.145	2.06536e-12
FBgn0052057	CG32057	dpr10	1.8181e-14	0.298824	0.32	0.158	2.72714e-11
FBgn0051324	CG31324	CG31324	3.30488e-14	0.241252	0.326	0.171	4.95731e-11
FBgn0001235	CG17117	hth	4.22087e-14	0.728304	0.661	0.54	6.3313e-11
FBgn0001226	CG4466	Hsp27	6.38672e-14	0.0862531	0.201	0.138	9.58009e-11
FBgn0030158	CG9686	CG9686	1.52204e-13	0.0794706	0.135	0.069	2.28307e-10
FBgn0031299	CG4629	CG4629	1.59901e-13	0.0986544	0.192	0.113	2.39852e-10
FBgn0001224	CG4463	Hsp23	2.64876e-13	0.0881005	0.227	0.155	3.97314e-10
FBgn0002945	CG11614	nkd	8.10171e-13	0.369269	0.435	0.279	1.21526e-09
FBgn0004607	CG1449	zfh2	1.20887e-12	0.148673	0.187	0.107	1.8133e-09
FBgn0020621	CG2049	Pkn	1.52861e-12	0.0781454	0.153	0.087	2.29292e-09
FBgn0264090	CG43759	CG43759	2.15485e-12	0.290631	0.297	0.163	3.23228e-09
FBgn0019662	CG8593	qm	2.8014e-12	0.0992921	0.149	0.066	4.20211e-09
FBgn0086680	CG10037	vvl	3.23977e-12	0.404077	0.252	0.14	4.85965e-09
FBgn0004652	CG14307	fru	3.27556e-12	0.484146	0.39	0.172	4.91335e-09
FBgn0038542	CG7431	TyrR	4.32074e-12	0.135066	0.177	0.096	6.48112e-09
FBgn0002940	CG4550	ninaE	7.54476e-12	-0.220203	0.14	0.236	1.13171e-08
FBgn0029663	CG10804	CG10804	1.32686e-11	1.08015	0.761	0.557	1.9903e-08
FBgn0014343	CG10601	mirr	6.27459e-11	0.165292	0.217	0.158	9.41189e-08
FBgn0004516	CG14994	Gad1	8.23088e-11	0.590288	0.947	0.946	1.23463e-07
FBgn0051690	CG31690	CG31690	8.23883e-11	0.292815	0.378	0.226	1.23583e-07
FBgn0052683	CG32683	CG32683	9.53284e-11	0.127004	0.201	0.116	1.42993e-07
FBgn0052626	CG32626	AMPdeam	9.81716e-11	0.132123	0.25	0.153	1.47257e-07
FBgn0003499	CG7847	sr	1.00149e-10	0.129696	0.298	0.224	1.50224e-07
FBgn0052698	CG32698	CARPB	1.07741e-10	0.417069	0.224	0.125	1.61612e-07
FBgn0015766	CG10596	Msr-110	1.08619e-10	0.066615	0.113	0.057	1.62929e-07
FBgn0040532	CG8369	CG8369	1.54139e-10	0.158506	0.213	0.118	2.31208e-07
FBgn0033356	CG8229	CG8229	6.50672e-10	-0.0240036	0.11	0.134	9.76008e-07
FBgn0031738	CG9171	CG9171	7.50553e-10	0.110828	0.202	0.116	1.12583e-06
FBgn0029939	CG9650	CG9650	8.72552e-10	0.220103	0.175	0.087	1.30883e-06
FBgn0259677	CG42346	CG42346	1.48646e-09	0.147018	0.209	0.121	2.22969e-06
FBgn0264753	CG44011	Rgk1	2.31472e-09	0.17229	0.242	0.124	3.47208e-06
FBgn0053517	CG33517	Dop2R	2.64221e-09	2.88211	0.903	0.835	3.96332e-06
FBgn0004619	CG8442	GluRIA	3.78553e-09	0.391763	0.412	0.251	5.67829e-06
FBgn0263772	CG43689	CG43689	4.39484e-09	0.327821	0.184	0.109	6.59225e-06
FBgn0031530	CG3254	Pgant2	4.68398e-09	0.120323	0.211	0.128	7.02598e-06
FBgn0285963	CG46339	CG46339	8.2612e-09	0.113815	0.225	0.14	1.23918e-05
FBgn0030272	CG15201	CG15201	1.08806e-08	0.108206	0.163	0.09	1.63208e-05
FBgn0086359	CG3953	Invadolysin	1.21439e-08	0.0519523	0.169	0.118	1.82159e-05
FBgn0036789	CG13702	AstC-R2	3.0688e-08	0.16661	0.207	0.124	4.6032e-05
FBgn0086604	CG12484	side-VIII	3.08292e-08	0.202245	0.292	0.173	4.62439e-05
FBgn0051481	CG31481	pb	3.40247e-08	0.108672	0.111	0.08	5.1037e-05
FBgn0262473	CG5490	Tl	3.4439e-08	0.0962375	0.195	0.13	5.16584e-05
FBgn0032666	CG5758	CG5758	3.85614e-08	0.283696	0.405	0.251	5.78422e-05
FBgn0087012	CG1056	5-HT2A	5.83145e-08	0.188432	0.194	0.11	8.74718e-05
FBgn0085426	CG34397	Rgk3	6.01798e-08	0.0975645	0.163	0.094	9.02697e-05
FBgn0032048	CG13094	Dh31	7.20239e-08	-0.33511	0.13	0.132	0.000108036
FBgn0030913	CG6123	CG6123	8.80542e-08	0.214186	0.331	0.229	0.000132081
FBgn0036801	CG6896	MYPT-75D	9.88314e-08	0.162388	0.316	0.209	0.000148247
FBgn0001234	CR31400	lncRNA:Hsromega	1.09088e-07	2.05216	0.981	0.976	0.000163631
FBgn0000287	CG4881	salr	1.10579e-07	0.17624	0.214	0.15	0.000165868
FBgn0032629	CG15138	beat-IIIc	1.11445e-07	0.37947	0.375	0.232	0.000167167
FBgn0033268	CG2297	Obp44a	1.22032e-07	0.253109	0.271	0.149	0.000183048
FBgn0262614	CG43140	pyd	1.33072e-07	0.205888	0.277	0.169	0.000199607
FBgn0004573	CG12073	5-HT7	1.45955e-07	0.0628161	0.158	0.11	0.000218932
FBgn0261509	CG14351	haf	3.89053e-07	0.132792	0.21	0.139	0.00058358
FBgn0036725	CG18265	CG18265	4.05396e-07	0.041728	0.104	0.07	0.000608094
FBgn0033368	CG13743	CG13743	4.41671e-07	0.102294	0.254	0.176	0.000662506
FBgn0052521	CG32521	CG32521	4.76163e-07	0.0948381	0.177	0.106	0.000714245
FBgn0085397	CG34368	Fili	5.19738e-07	0.0754514	0.161	0.119	0.000779607
FBgn0052066	CG32066	CG32066	5.3975e-07	0.137371	0.214	0.114	0.000809625
FBgn0031294	CG31795	IA-2	5.97075e-07	5.34296	0.972	0.961	0.000895613
FBgn0260971	CG42594	CG42594	6.57743e-07	0.41675	0.389	0.196	0.000986614
FBgn0013686	CR34094	mt:lrRNA	7.1739e-07	0.724997	0.945	0.931	0.00107609
FBgn0014859	CG1864	Hr38	7.21231e-07	0.161913	0.387	0.315	0.00108185
FBgn0033405	CG13954	CG13954	7.33332e-07	0.234759	0.301	0.162	0.0011
FBgn0038980	CG6919	Octbeta1R	1.29828e-06	0.0993019	0.18	0.106	0.00194742
FBgn0001186	CG3001	Hex-A	1.40312e-06	2.58819	0.865	0.621	0.00210467
FBgn0040877	CG12994	CG12994	1.41137e-06	0.0734121	0.117	0.068	0.00211706
FBgn0024321	CG8524	NK7.1	1.4884e-06	0.0997215	0.225	0.151	0.0022326
FBgn0004395	CG4620	unk	1.53636e-06	0.0971395	0.233	0.162	0.00230453
FBgn0261260	CG42611	mgl	2.02859e-06	0.0785558	0.193	0.138	0.00304289
FBgn0283651	CG46301	CG46301	2.22953e-06	0.124767	0.283	0.216	0.0033443
FBgn0025525	CG9102	bab2	2.44511e-06	0.0772399	0.149	0.1	0.00366766
FBgn0264442	CG43860	ab	2.53121e-06	0.11947	0.377	0.325	0.00379681
FBgn0261698	CG42732	SLO2	3.01764e-06	0.250316	0.373	0.229	0.00452646
FBgn0031971	CG7224	Sirup	3.1059e-06	0.0990589	0.235	0.159	0.00465885
FBgn0051361	CG31361	dpr17	3.23041e-06	0.165951	0.248	0.166	0.00484562
FBgn0034286	CG33996	dpr13	3.86437e-06	0.499064	0.458	0.295	0.00579656
FBgn0040823	CG14162	dpr6	4.24187e-06	0.145287	0.349	0.259	0.00636281
FBgn0263994	CG43737	CG43737	4.66273e-06	0.353842	0.588	0.473	0.00699409
FBgn0261090	CG42333	Sytbeta	5.82132e-06	0.0727894	0.149	0.091	0.00873198
FBgn0259245	CG42343	DIP-beta	5.89495e-06	0.125421	0.168	0.117	0.00884242
FBgn0020269	CG10145	mspo	6.18335e-06	0.279035	0.323	0.2	0.00927503
FBgn0000042	CG4027	Act5C	6.43752e-06	0.416283	0.774	0.733	0.00965628
FBgn0053696	CG33696	CNMaR	7.61054e-06	0.125121	0.149	0.092	0.0114158
FBgn0037676	CG8861	CG8861	7.96783e-06	0.190443	0.418	0.336	0.0119517
FBgn0000097	CG3166	aop	9.5061e-06	0.154345	0.252	0.159	0.0142592
FBgn0045038	CG7105	Proc	9.90025e-06	0.156185	0.217	0.16	0.0148504
FBgn0262636	CG2052	dati	1.04268e-05	0.0653946	0.397	0.387	0.0156402
FBgn0283499	CG18402	InR	1.10796e-05	0.0920322	0.236	0.172	0.0166194
FBgn0013995	CG5685	Calx	1.19694e-05	0.316397	0.353	0.194	0.0179541
FBgn0051475	CG31475	CG31475	1.29428e-05	0.0538526	0.127	0.088	0.0194142
FBgn0037475	CG33323	Fer1	1.43845e-05	0.0107648	0.16	0.148	0.0215767
FBgn0005636	CG3385	nvy	1.46953e-05	-0.00778301	0.259	0.26	0.022043
FBgn0000459	CG9908	disco	2.08788e-05	0.111734	0.118	0.077	0.0313181
FBgn0003301	CG9533	rut	2.15007e-05	0.169154	0.297	0.186	0.0322511
FBgn0013718	CG33991	nuf	2.52974e-05	0.0556961	0.122	0.075	0.037946
FBgn0051646	CG31646	DIP-theta	2.56181e-05	0.138287	0.225	0.162	0.0384272
FBgn0264895	CG44086	RapGAP1	2.66e-05	0.532459	0.523	0.392	0.0399
FBgn0261999	CG42817	Ca-Ma2d	2.8634e-05	0.133247	0.243	0.153	0.042951
FBgn0263773	CG43690	fok	2.92991e-05	0.198161	0.286	0.164	0.0439487
FBgn0050361	CG30361	mtt	3.35413e-05	0.0899551	0.209	0.15	0.0503119
FBgn0284245	CG8280	eEF1alpha1	3.58806e-05	0.197132	0.386	0.266	0.053821
FBgn0004168	CG16720	5-HT1A	3.68553e-05	0.240026	0.322	0.214	0.0552829
FBgn0015519	CG2302	nAChRalpha3	3.6928e-05	0.197615	0.37	0.256	0.055392
FBgn0260943	CG32169	Rbp6	3.82434e-05	3.96137	0.943	0.905	0.0573651
FBgn0019985	CG11144	mGluR	3.91008e-05	0.232392	0.399	0.309	0.0586512
FBgn0037015	CG13253	cmpy	4.10938e-05	0.207607	0.377	0.271	0.0616406
FBgn0033159	CG17800	Dscam1	4.37727e-05	0.117865	0.24	0.157	0.0656591
FBgn0264001	CG43744	bru3	4.4501e-05	0.728123	0.725	0.66	0.0667515
FBgn0267322	CR45758	lncRNA:CR45758	4.6725e-05	0.111806	0.22	0.137	0.0700875
FBgn0250869	CG42240	CG42240	4.87608e-05	0.0478074	0.123	0.084	0.0731411
FBgn0053087	CG33087	LRP1	5.22272e-05	0.0414984	0.134	0.102	0.0783408
FBgn0263706	CG43658	CG43658	5.75457e-05	0.0926282	0.181	0.124	0.0863186
FBgn0000303	CG12345	ChAT	7.01644e-05	0.137033	0.191	0.1	0.105247
FBgn0000547	CG12676	ed	7.23921e-05	0.205499	0.321	0.216	0.108588
FBgn0037874	CG4800	Tctp	9.05862e-05	0.0969374	0.426	0.372	0.135879
FBgn0031424	CG9887	VGlut	9.37687e-05	0.318672	0.198	0.123	0.140653
FBgn0285879	CG32577	disco-r	9.74352e-05	0.121514	0.113	0.069	0.146153
FBgn0051345	CG31345	CG31345	9.7559e-05	0.134083	0.175	0.109	0.146339
FBgn0000116	CG32031	Argk	9.85026e-05	0.7377	0.874	0.812	0.147754
FBgn0013733	CG18076	shot	9.89844e-05	0.148289	0.381	0.288	0.148477
FBgn0261648	CG6464	salm	0.000101882	0.0795732	0.127	0.085	0.152824
FBgn0053143	CG33143	CG33143	0.000102829	0.0679487	0.288	0.232	0.154244
FBgn0040765	CG33473	luna	0.000110916	0.528597	0.471	0.305	0.166374
FBgn0003975	CG3830	vg	0.000121582	-0.0265209	0.117	0.126	0.182374
FBgn0037941	CG12594	CG12594	0.000126322	0.150239	0.307	0.247	0.189483
FBgn0250908	CG42242	beat-VII	0.000129871	0.158822	0.465	0.408	0.194807
FBgn0004580	CG6702	Cbp53E	0.00013025	3.47944	0.714	0.488	0.195376
FBgn0050419	CG30419	CG30419	0.000134914	0.0962322	0.215	0.168	0.202372
FBgn0263219	CG42330	Dscam4	0.000135906	0.152006	0.311	0.226	0.203858
FBgn0261836	CG42768	Msp300	0.000146348	1.48382	0.87	0.81	0.219522
FBgn0066101	CG31094	LpR1	0.000178015	0.133115	0.32	0.249	0.267023
FBgn0264908	CG44099	pHCl-1	0.000183711	0.0813607	0.319	0.257	0.275567
FBgn0259213	CG42313	side-II	0.000213106	0.179292	0.439	0.354	0.319659
FBgn0261258	CG6014	rgn	0.000223546	0.0475858	0.223	0.179	0.335318
FBgn0264794	CR44024	lncRNA:CR44024	0.00025691	0.0229746	0.301	0.296	0.385365
FBgn0037153	CG12673	olf413	0.000267005	0.156389	0.38	0.309	0.400508
FBgn0033987	CG12424	ckn	0.000285841	0.0848648	0.192	0.126	0.428762
FBgn0085412	CG34383	kmr	0.000312192	0.221446	0.373	0.257	0.468288
FBgn0050463	CG30463	Pgant9	0.000351361	0.163623	0.297	0.211	0.527041
FBgn0040726	CG13439	dpr1	0.000356546	0.142844	0.382	0.317	0.534818
FBgn0004885	CG6863	tok	0.000357975	0.0112328	0.148	0.141	0.536963
FBgn0052183	CG32183	Ccn	0.000411536	0.071136	0.182	0.141	0.617303
FBgn0004606	CG1322	zfh1	0.000414844	0.0622938	0.111	0.067	0.622266
FBgn0031897	CG13784	CG13784	0.00041876	0.0940165	0.284	0.217	0.62814
FBgn0261262	CG42613	CG42613	0.000436998	1.22218	0.747	0.546	0.655497
FBgn0053516	CG33516	dpr3	0.00044907	0.0880393	0.175	0.122	0.673606
FBgn0026411	CG11354	Lim1	0.000461589	0.301622	0.256	0.171	0.692384
FBgn0029824	CG3726	CG3726	0.000490892	0.137863	0.255	0.175	0.736338
FBgn0040153	CG32597	l(1)G0469	0.000498571	0.0415268	0.117	0.091	0.747856
FBgn0004198	CG11387	ct	0.000510382	1.03543	0.408	0.245	0.765573
FBgn0265597	CG44424	rad	0.000510649	0.411647	0.501	0.41	0.765974
FBgn0032840	CG13968	sNPF	0.000511485	0.262868	0.18	0.117	0.767228
FBgn0263353	CG11000	CG11000	0.000644295	0.387798	0.568	0.437	0.966443
FBgn0052600	CG32600	dpr8	0.00065783	0.321562	0.45	0.32	0.986744
FBgn0033791	CG3915	Drl-2	0.000697504	0.0671772	0.157	0.11	1
FBgn0039816	CG11317	CG11317	0.000700618	0.0610885	0.179	0.131	1
FBgn0000575	CG1007	emc	0.000703954	0.0712959	0.269	0.219	1
FBgn0033438	CG1794	Mmp2	0.000724767	0.0324599	0.263	0.237	1
FBgn0085370	CG34341	Pde11	0.00075644	0.0709992	0.179	0.133	1
FBgn0035032	CG4692	ATPsynF	0.000858216	1.00941	0.872	0.828	1
FBgn0001078	CG4059	ftz-f1	0.00100156	0.13175	0.331	0.254	1
FBgn0262160	CG9932	CG9932	0.00100399	0.204375	0.316	0.204	1
FBgn0264273	CG33960	Sema2b	0.0010365	0.148492	0.303	0.235	1
FBgn0030897	CG5744	Frq1	0.00105215	1.31654	0.759	0.579	1
FBgn0261928	CG42795	CG42795	0.00107694	0.249559	0.41	0.285	1
FBgn0085384	CG34355	CG34355	0.00110907	0.0766492	0.114	0.058	1
FBgn0085420	CG34391	DIP-delta	0.00117732	0.227648	0.356	0.287	1
FBgn0000422	CG10697	Ddc	0.00120369	0.0334108	0.402	0.408	1
FBgn0260658	CG42541	CG42541	0.00128211	0.232847	0.508	0.442	1
FBgn0010412	CG4464	RpS19a	0.00135081	0.0396616	0.33	0.304	1
FBgn0267253	CG32700	CG32700	0.00144881	0.243833	0.34	0.232	1
FBgn0260941	CG42318	app	0.00149447	0.146001	0.306	0.234	1
FBgn0015400	CG4977	kek2	0.00153808	0.162001	0.423	0.345	1
FBgn0040397	CG3655	CG3655	0.00159217	0.088888	0.184	0.126	1
FBgn0031698	CG1402	Ncoa6	0.00162974	0.0652294	0.134	0.104	1
FBgn0033484	CG2269	CG2269	0.00168064	1.17356	0.814	0.738	1
FBgn0011656	CG1429	Mef2	0.00178842	0.0969992	0.263	0.199	1
FBgn0015919	CG10605	caup	0.00185731	0.0705209	0.135	0.121	1
FBgn0085399	CG34370	CG34370	0.00190425	0.108639	0.203	0.13	1
FBgn0085409	CG34380	smal	0.00192811	0.117219	0.279	0.204	1
FBgn0270928	CG32848	VAChT	0.00202438	0.206369	0.233	0.118	1
FBgn0001225	CG4183	Hsp26	0.0021809	0.091271	0.205	0.157	1
FBgn0266871	CR45332	lncRNA:CR45332	0.00240441	-0.0204454	0.152	0.164	1
FBgn0267336	CG34360	Glut4EF	0.00260485	1.18877	0.8	0.677	1
FBgn0004910	CG15855	Eip63F-1	0.00260842	0.0907035	0.253	0.194	1
FBgn0051163	CG31163	SKIP	0.00268231	0.386265	0.447	0.298	1
FBgn0259244	CG42342	CG42342	0.00273862	0.316534	0.526	0.426	1
FBgn0264308	CG43778	CG43778	0.00293964	0.142967	0.376	0.303	1
FBgn0030505	CG11172	NFAT	0.00303538	0.139718	0.359	0.282	1
FBgn0036043	CG8177	CG8177	0.00312123	0.137607	0.358	0.275	1
FBgn0039420	CG6154	CG6154	0.00331568	0.0516032	0.203	0.172	1
FBgn0000567	CG32180	Eip74EF	0.00334792	0.046953	0.105	0.059	1
FBgn0051092	CG31092	LpR2	0.00345538	0.0449483	0.155	0.116	1
FBgn0033192	CG2105	Corin	0.00352848	0.327949	0.581	0.508	1
FBgn0085413	CG34384	CG34384	0.00354149	0.138729	0.29	0.211	1
FBgn0000636	CG5803	Fas3	0.00363637	0.0814722	0.209	0.161	1
FBgn0051619	CG31619	nolo	0.00379247	0.148004	0.301	0.221	1
FBgn0003165	CG9755	pum	0.00380067	0.608594	0.815	0.776	1
FBgn0085410	CG34381	TrissinR	0.00397077	0.0335831	0.112	0.085	1
FBgn0020907	CG14904	Scp2	0.00403633	0.236075	0.211	0.152	1
FBgn0000659	CG10002	fkh	0.00412119	0.118571	0.116	0.084	1
FBgn0029761	CG10706	SK	0.00414143	0.439696	0.67	0.595	1
FBgn0266100	CG44837	CG44837	0.00415822	0.0617529	0.158	0.115	1
FBgn0267337	CG42277	rn	0.00462566	0.0414642	0.119	0.091	1
FBgn0011818	CG9884	oaf	0.00470528	0.0849181	0.196	0.148	1
FBgn0261555	CG42673	CG42673	0.00489289	-0.00273926	0.101	0.099	1
FBgn0029897	CG3203	RpL17	0.00541414	0.366662	0.744	0.702	1
FBgn0041707	CG1168	7B2	0.00599954	0.406299	0.819	0.772	1
FBgn0000121	CG5962	Arr2	0.00628161	-0.0677777	0.139	0.158	1
FBgn0035041	CG13594	CG13594	0.00629388	0.0387778	0.154	0.123	1
FBgn0264975	CG1634	Nrg	0.00666793	0.094474	0.26	0.191	1
FBgn0283451	CG11491	br	0.00726613	0.171194	0.241	0.195	1
FBgn0264000	CG43743	GluRIB	0.0073212	0.447278	0.517	0.372	1
FBgn0037913	CG6783	fabp	0.00741477	0.0780242	0.198	0.14	1
FBgn0043364	CG4427	cbt	0.00754708	0.0538526	0.131	0.088	1
FBgn0053147	CG33147	Hs3st-A	0.00773107	0.455134	0.515	0.363	1
FBgn0023534	CG17778	CG17778	0.00790471	0.101176	0.238	0.168	1
FBgn0028645	CG7644	beat-Ib	0.0081042	0.176273	0.364	0.292	1
FBgn0051665	CG31665	wry	0.00812415	0.559458	0.552	0.388	1
FBgn0261113	CG17836	Xrp1	0.00825933	0.0995794	0.263	0.198	1
FBgn0086758	CG31666	chinmo	0.0083055	0.41984	0.731	0.67	1
FBgn0039770	CG15537	CG15537	0.00849407	0.265454	0.123	0.093	1
FBgn0013688	CR34096	mt:srRNA	0.00856475	0.0785007	0.197	0.134	1
FBgn0267252	CG3694	Ggamma30A	0.0085765	2.61472	0.919	0.869	1
FBgn0052647	CG32647	CG32647	0.00866855	0.146969	0.316	0.234	1
FBgn0000635	CG3665	Fas2	0.00883252	0.576373	0.427	0.225	1
FBgn0051814	CG31814	DIP-kappa	0.00892803	0.299935	0.284	0.215	1
FBgn0041605	CG32490	cpx	0.00897655	2.70929	0.967	0.941	1
FBgn0028369	CG3653	kirre	0.00898793	0.18894	0.354	0.26	1
FBgn0014184	CG16747	Oda	0.0094177	0.660939	0.761	0.699	1
FBgn0261588	CG42698	pdm3	0.00968048	0.121537	0.24	0.191	1
FBgn0261871	CG33507	dpr2	0.0100572	0.049841	0.156	0.116	1
FBgn0010113	CG15532	hdc	0.0104185	1.06989	0.74	0.598	1
FBgn0261649	CG31247	tinc	0.0109705	0.0479065	0.187	0.151	1
FBgn0035756	CG32381	unc-13-4A	0.0110137	0.108824	0.273	0.224	1
FBgn0260003	CG34157	Dys	0.0110298	0.0620758	0.185	0.137	1
FBgn0030090	CG12664	fend	0.0110466	0.346032	0.561	0.434	1
FBgn0266756	CG44012	btsz	0.0110738	0.0453031	0.104	0.064	1
FBgn0000037	CG4356	mAChR-A	0.0110757	0.230951	0.492	0.39	1
FBgn0010452	CG11280	trn	0.0113344	0.194869	0.224	0.143	1
FBgn0033544	CG7220	CG7220	0.0113619	0.0776085	0.236	0.17	1
FBgn0039089	CG10152	beat-IV	0.0116176	0.0655771	0.227	0.182	1
FBgn0264339	CG43795	CG43795	0.011885	0.0552032	0.217	0.183	1
FBgn0025382	CG14791	Rab27	0.0119555	0.00309899	0.108	0.109	1
FBgn0259243	CG42341	Pka-R1	0.0128623	0.137171	0.35	0.288	1
FBgn0265595	CG44422	CG44422	0.0132137	0.321188	0.387	0.259	1
FBgn0030174	CG15312	CG15312	0.0134594	0.112579	0.302	0.237	1
FBgn0260462	CG12163	CG12163	0.0136567	0.0596341	0.166	0.121	1
FBgn0004882	CG10868	orb	0.0138371	0.0480828	0.122	0.09	1
FBgn0034408	CG12758	sano	0.013893	0.0319465	0.124	0.101	1
FBgn0052017	CG32017	CG32017	0.0138993	0.380338	0.797	0.79	1
FBgn0053639	CG33639	CG33639	0.0145881	0.0531292	0.107	0.067	1
FBgn0031306	CG4577	CG4577	0.0151474	0.189374	0.347	0.288	1
FBgn0036381	CG8745	CG8745	0.015811	0.0547982	0.133	0.087	1
FBgn0033446	CG1648	CG1648	0.0158217	0.0935209	0.25	0.196	1
FBgn0010434	CG11949	cora	0.0165357	0.0785442	0.177	0.11	1
FBgn0004858	CG4220	elB	0.0166105	0.0549372	0.214	0.178	1
FBgn0052264	CG32264	CG32264	0.0171914	0.916148	0.836	0.755	1
FBgn0051760	CG31760	CG31760	0.0175912	0.0762531	0.245	0.201	1
FBgn0016061	CG31062	side	0.0183164	0.200895	0.5	0.445	1
FBgn0036454	CG17839	CG17839	0.0187906	0.0749181	0.194	0.144	1
FBgn0005775	CG7503	Con	0.018917	0.920901	0.553	0.368	1
FBgn0001230	CG5436	Hsp68	0.0189423	0.0517072	0.106	0.066	1
FBgn0032151	CG4128	nAChRalpha6	0.0200068	1.7753	0.814	0.674	1
FBgn0085447	CG34418	sif	0.0201537	1.85945	0.797	0.602	1
FBgn0027608	CG2082	CG2082	0.0202973	0.205916	0.367	0.271	1
FBgn0027654	CG2239	jdp	0.0209531	0.69574	0.647	0.551	1
FBgn0085407	CG34378	Pvf3	0.0220737	0.675876	0.547	0.412	1
FBgn0038653	CG18208	Octalpha2R	0.0222911	0.208127	0.436	0.365	1
FBgn0024841	CG1963	Pcd	0.0223043	0.0820589	0.23	0.177	1
FBgn0034138	CG8332	RpS15	0.0229276	0.940461	0.922	0.878	1
FBgn0004244	CG10537	Rdl	0.0230657	1.62948	0.962	0.927	1
FBgn0015774	CG10521	NetB	0.0235522	0.149331	0.312	0.252	1
FBgn0264606	CG43955	Fife	0.0256916	0.0738287	0.432	0.397	1
FBgn0032400	CG6770	CG6770	0.0262584	0.856999	0.773	0.639	1
FBgn0031770	CG13995	CG13995	0.0271428	0.0671493	0.258	0.218	1
FBgn0011666	CG5099	msi	0.0275379	0.940163	0.692	0.493	1
FBgn0261552	CG42670	ps	0.0288648	1.43905	0.929	0.918	1
FBgn0030723	CG14948	dpr18	0.0294768	0.0321233	0.172	0.149	1
FBgn0266801	CG45263	CG45263	0.0295382	0.127983	0.513	0.46	1
FBgn0065099	CR33925	snRNA:7SK	0.0299595	-0.289163	0.833	0.803	1
FBgn0000064	CG6058	Ald1	0.0319335	1.23407	0.863	0.783	1
FBgn0035499	CG14996	Chd64	0.0319648	0.0212479	0.153	0.134	1
FBgn0267033	CG45477	mamo	0.0329596	1.73852	0.607	0.427	1
FBgn0004449	CG5723	Ten-m	0.0339215	0.194583	0.433	0.358	1
FBgn0040297	CG9256	Nhe2	0.0348026	0.0590416	0.15	0.099	1
FBgn0286778	CG46385	CG46385	0.0349002	0.2888	0.487	0.386	1
FBgn0243512	CG7850	puc	0.0364353	0.0584474	0.149	0.109	1
FBgn0013433	CG4846	beat-Ia	0.0380881	0.0545232	0.178	0.146	1
FBgn0052406	CG32406	PVRAP	0.040273	0.0452201	0.189	0.155	1
FBgn0033108	CG15236	CG15236	0.042078	0.137169	0.328	0.272	1
FBgn0011828	CG12002	Pxn	0.0422455	0.0436248	0.122	0.082	1
FBgn0010313	CG2530	corto	0.0426938	0.228559	0.465	0.362	1
FBgn0031016	CG12199	kek5	0.0429147	0.0621402	0.154	0.107	1
FBgn0042696	CG2380	NfI	0.0436854	0.0887041	0.256	0.195	1
FBgn0011661	CG10701	Moe	0.0450876	0.0767998	0.246	0.198	1
FBgn0019650	CG11186	toy	0.0465231	0.0847666	0.235	0.195	1
FBgn0261285	CG5629	Ppcs	0.0486253	0.104043	0.193	0.135	1
FBgn0013467	CG18285	igl	0.0486756	0.498056	0.605	0.507	1
FBgn0259242	CG42340	CG42340	0.0489054	0.10372	0.266	0.201	1
FBgn0267910	CR34335	lncRNA:CR34335	0.0497871	20.3532	0.995	0.9	1
FBgn0083949	CG34113	side-III	0.0500969	0.5323	0.497	0.346	1
FBgn0004369	CG11516	Ptp99A	0.0502325	0.895612	0.734	0.56	1
FBgn0051221	CG31221	CG31221	0.0511215	2.53611	0.708	0.475	1
FBgn0001085	CG17697	fz	0.0511373	0.0785447	0.235	0.193	1
FBgn0264503	CG43902	CG43902	0.0568824	0.157704	0.277	0.21	1
FBgn0261988	CG17998	Gprk2	0.0570115	0.445857	0.515	0.331	1
FBgn0031736	CG11030	CG11030	0.058085	0.0241271	0.298	0.292	1
FBgn0028644	CG4838	beat-Ic	0.0588788	0.89911	0.58	0.408	1
FBgn0037171	CG14459	CG14459	0.0627875	-0.0374739	0.135	0.149	1
FBgn0052206	CG32206	CG32206	0.0631406	0.0806009	0.256	0.203	1
FBgn0015777	CG9261	nrv2	0.0636043	0.0601865	0.157	0.113	1
FBgn0040805	CG12355	CG12355	0.0638259	0.0350242	0.147	0.117	1
FBgn0004611	CG4574	Plc21C	0.0664025	0.255656	0.486	0.395	1
FBgn0013576	CG32464	mtd	0.0677477	0.774139	0.854	0.816	1
FBgn0264087	CG43756	Slob	0.0678027	0.0731163	0.209	0.156	1
FBgn0265296	CG42256	Dscam2	0.06845	1.11013	0.753	0.68	1
FBgn0085414	CG34385	dpr12	0.0695452	0.229356	0.473	0.382	1
FBgn0265182	CG44247	CG44247	0.0700604	0.0710721	0.293	0.254	1
FBgn0265598	CG44425	Bx	0.0745793	0.205527	0.341	0.285	1
FBgn0052204	CG32204	CG32204	0.0759272	0.0698126	0.161	0.122	1
FBgn0262593	CG43128	Shab	0.0762749	0.294498	0.506	0.39	1
FBgn0026160	CG7958	tna	0.0770253	0.451065	0.55	0.394	1
FBgn0017590	CG6669	klg	0.0778226	0.251495	0.561	0.526	1
FBgn0003360	CG16944	sesB	0.0793759	1.82558	0.924	0.9	1
FBgn0039209	CG13624	REPTOR	0.079503	0.119139	0.273	0.201	1
FBgn0025885	CG11143	Inos	0.0826129	0.0409135	0.112	0.074	1
FBgn0264815	CG44007	Pde1c	0.0837992	0.162675	0.37	0.306	1
FBgn0015399	CG12283	kek1	0.084357	0.356904	0.492	0.376	1
FBgn0003423	CG1417	slgA	0.0869451	0.485912	0.792	0.743	1
FBgn0259789	CG12701	zld	0.0869783	0.0580965	0.21	0.178	1
FBgn0032833	CG10664	COX4	0.0874463	0.725614	0.867	0.856	1
FBgn0031374	CG7337	Wdr62	0.0888635	0.545155	0.563	0.381	1
FBgn0051774	CG31774	fred	0.091524	0.0836728	0.242	0.187	1
FBgn0034725	CG6044	CG6044	0.0924529	0.0667238	0.507	0.479	1
FBgn0085387	CG34358	shakB	0.0925812	0.331365	0.624	0.559	1
FBgn0086677	CG30040	jeb	0.0935549	0.639027	0.556	0.404	1
FBgn0263873	CG43720	sick	0.0944268	0.0318648	0.123	0.094	1
FBgn0263220	CG43388	Hk	0.0966034	0.758233	0.783	0.665	1
FBgn0019643	CG3318	AANAT1	0.100559	-0.00298175	0.203	0.21	1
FBgn0085385	CG34356	bma	0.101807	0.0508816	0.147	0.123	1
FBgn0024189	CG33141	sns	0.10648	0.0509859	0.173	0.132	1
FBgn0052432	CG32432	CG32432	0.109139	0.0805667	0.259	0.201	1
FBgn0028704	CG18660	Nckx30C	0.109156	0.607341	0.776	0.745	1
FBgn0029814	CG15765	CG15765	0.109236	0.320051	0.504	0.415	1
FBgn0264490	CG18389	Eip93F	0.110233	0.278288	0.333	0.254	1
FBgn0285944	CG9907	para	0.110817	1.32971	0.89	0.853	1
FBgn0263257	CG43395	Cngl	0.118531	1.46432	0.809	0.683	1
FBgn0036144	CG6207	GlcAT-P	0.120782	0.194638	0.369	0.296	1
FBgn0034583	CG10527	CG10527	0.127273	0.0244109	0.106	0.089	1
FBgn0028875	CG32975	nAChRalpha5	0.127345	0.899611	0.808	0.715	1
FBgn0001091	CG12055	Gapdh1	0.128702	0.249093	0.519	0.421	1
FBgn0052677	CG32677	X11Lbeta	0.132623	0.248842	0.473	0.366	1
FBgn0027598	CG31012	cindr	0.134431	0.735959	0.686	0.49	1
FBgn0011582	CG9652	Dop1R1	0.136415	0.0546338	0.262	0.249	1
FBgn0266137	CG18741	Dop1R2	0.137828	0.0504903	0.138	0.103	1
FBgn0035173	CG13907	CG13907	0.139228	0.0435546	0.147	0.111	1
FBgn0265194	CG44240	Trpm	0.140594	0.0488347	0.132	0.096	1
FBgn0035816	CG13685	CG13685	0.148082	0.032594	0.158	0.135	1
FBgn0027339	CG11352	jim	0.150598	1.54495	0.932	0.927	1
FBgn0085434	CG34405	NaCP60E	0.152111	0.79754	0.745	0.621	1
FBgn0260793	CG42573	2mit	0.153032	0.0318484	0.235	0.213	1
FBgn0261244	CG33174	inaE	0.153186	0.37319	0.516	0.363	1
FBgn0015609	CG7100	CadN	0.153847	0.218506	0.531	0.471	1
FBgn0266418	CG45058	wake	0.154841	0.032801	0.146	0.118	1
FBgn0260660	CG42543	Mp	0.155974	0.196379	0.38	0.306	1
FBgn0022382	CG15862	Pka-R2	0.15715	0.273127	0.434	0.303	1
FBgn0033250	CG14762	CG14762	0.157297	0.126057	0.216	0.138	1
FBgn0039054	CG13830	Cow	0.160451	0.245288	0.557	0.47	1
FBgn0029123	CG18024	SoxN	0.160847	0.319612	0.276	0.181	1
FBgn0004509	CG10772	Fur1	0.160924	0.0433632	0.2	0.176	1
FBgn0027356	CG8604	Amph	0.163239	0.0631163	0.22	0.167	1
FBgn0038494	CG4135	beat-IIb	0.163673	0.0567633	0.15	0.111	1
FBgn0024944	CG3856	Oamb	0.163704	0.0454874	0.127	0.1	1
FBgn0050089	CG30089	CG30089	0.176889	-0.00321002	0.123	0.125	1
FBgn0083991	CG34155	CG34155	0.179141	0.0807146	0.168	0.135	1
FBgn0013981	CG3379	His4r	0.182445	1.27408	0.96	0.939	1
FBgn0011676	CG6713	Nos	0.186684	0.0734618	0.138	0.113	1
FBgn0085382	CG34353	CG34353	0.1922	0.0877435	0.249	0.198	1
FBgn0036165	CG7533	chrb	0.192944	0.624032	0.728	0.67	1
FBgn0261089	CG5559	Sytalpha	0.194955	0.00161434	0.113	0.114	1
FBgn0038063	CG33976	Octbeta2R	0.196799	0.32985	0.462	0.326	1
FBgn0041094	CG7590	scyl	0.202432	0.268409	0.489	0.374	1
FBgn0031835	CG11319	CG11319	0.204539	0.178561	0.412	0.359	1
FBgn0036927	CG7433	Gabat	0.209693	0.100613	0.438	0.415	1
FBgn0044328	CG32052	CG32052	0.217642	0.12298	0.279	0.222	1
FBgn0030412	CG17762	Tomosyn	0.21847	0.576009	0.69	0.566	1
FBgn0031697	CG14024	CG14024	0.220804	0.0201372	0.142	0.123	1
FBgn0263930	CG4974	dally	0.230276	0.266485	0.358	0.228	1
FBgn0264386	CG15899	Ca-alpha1T	0.230738	0.686434	0.545	0.434	1
FBgn0038237	CG8279	Pde6	0.238375	0.43428	0.56	0.432	1
FBgn0002643	CG8118	mam	0.240817	0.0438722	0.234	0.203	1
FBgn0041097	CG5423	robo3	0.250007	0.036325	0.19	0.158	1
FBgn0261556	CG42674	CG42674	0.251276	0.24827	0.369	0.291	1
FBgn0000633	CG17716	CG17716	0.253203	0.686651	0.521	0.357	1
FBgn0000024	CG17907	Ace	0.254984	0.314253	0.453	0.325	1
FBgn0003380	CG12348	Sh	0.255079	1.77973	0.943	0.932	1
FBgn0011224	CG31000	heph	0.258685	0.886322	0.572	0.434	1
FBgn0033196	CG1358	CG1358	0.268785	0.0405738	0.126	0.093	1
FBgn0039349	CG4685	Ssadh	0.283337	0.101771	0.389	0.353	1
FBgn0032901	CG9339	sky	0.2861	0.188639	0.48	0.411	1
FBgn0265052	CG44167	St3	0.288616	0.0185407	0.18	0.157	1
FBgn0262737	CG7437	mub	0.292431	0.81841	0.7	0.586	1
FBgn0039584	CG14064	beat-VI	0.293863	0.0939561	0.297	0.254	1
FBgn0000179	CG3578	bi	0.296659	0.238514	0.227	0.173	1
FBgn0032797	CG10186	Hasp	0.297673	1.27526	0.905	0.864	1
FBgn0085383	CG34354	CG34354	0.298599	0.135646	0.33	0.278	1
FBgn0013973	CG1470	Gycbeta100B	0.305908	0.0729094	0.205	0.16	1
FBgn0000108	CG7727	Appl	0.309719	1.3259	0.867	0.821	1
FBgn0002868	CG9470	MtnA	0.312512	0.414715	0.357	0.168	1
FBgn0261574	CG7749	kug	0.313119	0.0445992	0.194	0.159	1
FBgn0035171	CG12502	CG12502	0.323008	0.0150868	0.119	0.104	1
FBgn0010411	CG8900	RpS18	0.323506	0.461502	0.863	0.868	1
FBgn0053179	CG33179	beat-IIIb	0.324918	0.0980495	0.3	0.259	1
FBgn0261804	CG42750	CG42750	0.330586	0.182907	0.41	0.338	1
FBgn0263980	CG43729	Stacl	0.331981	0.377135	0.595	0.536	1
FBgn0010473	CG15427	tutl	0.332999	0.5494	0.691	0.618	1
FBgn0015229	CG6575	glec	0.336061	0.392862	0.423	0.231	1
FBgn0000036	CG5610	nAChRalpha1	0.337061	0.243029	0.495	0.408	1
FBgn0010263	CG3151	Rbp9	0.344257	0.394818	0.59	0.499	1
FBgn0023179	CG6438	amon	0.35122	0.241196	0.443	0.348	1
FBgn0003274	CG4918	RpLP2	0.352732	0.282635	0.658	0.623	1
FBgn0267579	CR45919	lncRNA:CR45919	0.354592	0.0229262	0.132	0.118	1
FBgn0085753	CR40596	28SrRNA-Psi:CR40596	0.354832	-0.000333526	0.151	0.143	1
FBgn0259108	CG34387	futsch	0.362908	2.95538	0.964	0.933	1
FBgn0263995	CG43738	cpo	0.363761	0.561156	0.68	0.54	1
FBgn0003326	CG17579	sca	0.368689	0.0576027	0.173	0.139	1
FBgn0023095	CG11282	caps	0.368712	0.0215082	0.175	0.164	1
FBgn0261046	CG31190	Dscam3	0.369466	0.0454212	0.183	0.15	1
FBgn0083950	CG34114	side-VI	0.376387	0.397805	0.486	0.348	1
FBgn0000114	CG31762	bru1	0.387705	0.0344735	0.114	0.088	1
FBgn0003091	CG6622	Pkc53E	0.39552	0.632002	0.579	0.396	1
FBgn0267001	CG42338	Ten-a	0.404764	2.00277	0.913	0.805	1
FBgn0263392	CG43444	Tet	0.421423	0.348991	0.579	0.48	1
FBgn0259170	CG42275	alpha-Man-Ia	0.423984	0.0624537	0.208	0.168	1
FBgn0262738	CG3620	norpA	0.427215	0.227738	0.539	0.485	1
FBgn0265002	CG44153	CG44153	0.439194	0.0224217	0.223	0.205	1
FBgn0013954	CG11001	Fkbp12	0.442256	0.173475	0.505	0.438	1
FBgn0037521	CG2993	CG2993	0.449191	0.0923747	0.35	0.299	1
FBgn0052506	CG32506	CG32506	0.45112	0.0673012	0.26	0.219	1
FBgn0038826	CG17838	Syp	0.45228	0.449063	0.618	0.527	1
FBgn0085390	CG34361	Dgk	0.452795	0.027441	0.11	0.089	1
FBgn0085400	CG34371	side-V	0.454571	0.0470636	0.196	0.163	1
FBgn0259212	CG42312	cno	0.459752	0.0254457	0.124	0.102	1
FBgn0085421	CG34392	Epac	0.462469	0.0660212	0.2	0.154	1
FBgn0014163	CG4609	fax	0.465308	1.04578	0.711	0.52	1
FBgn0284243	CG9277	betaTub56D	0.474723	0.416763	0.55	0.43	1
FBgn0036844	CG14080	Mkp3	0.477917	0.405434	0.546	0.411	1
FBgn0028370	CG4192	kek3	0.483697	0.0958711	0.187	0.137	1
FBgn0028481	CG4341	CG4341	0.484351	0.0583133	0.27	0.234	1
FBgn0266377	CG45019	Pde8	0.487892	0.0105378	0.132	0.122	1
FBgn0085395	CG34366	Shawl	0.492208	0.0659204	0.175	0.128	1
FBgn0052062	CG32062	Rbfox1	0.495954	1.6442	0.897	0.806	1
FBgn0266851	CR45312	lncRNA:CR45312	0.49672	0.0387765	0.236	0.207	1
FBgn0025682	CG9148	scf	0.497168	0.0220451	0.102	0.08	1
FBgn0262018	CG42829	CadN2	0.499929	0.0301905	0.172	0.154	1
FBgn0265487	CG33197	mbl	0.501461	1.65003	0.749	0.64	1
FBgn0263289	CG43398	scrib	0.508558	0.0322485	0.165	0.132	1
FBgn0002593	CG4087	RpLP1	0.515018	0.549952	0.798	0.739	1
FBgn0038087	CG10134	beat-Va	0.517881	0.00412044	0.115	0.107	1
FBgn0031414	CG33955	eys	0.527562	0.460836	0.483	0.38	1
FBgn0034753	CG2852	CG2852	0.528637	0.209695	0.543	0.482	1
FBgn0038498	CG14334	beat-IIa	0.537551	0.282561	0.353	0.265	1
FBgn0027589	CG1688	CG1688	0.570022	0.0876369	0.182	0.146	1
FBgn0066084	CG30425	RpL41	0.573699	4.1201	0.929	0.776	1
FBgn0000535	CG10952	eag	0.581	0.094879	0.344	0.299	1
FBgn0085391	CG34362	trv	0.591875	1.02908	0.668	0.547	1
FBgn0053202	CG33202	dpr11	0.600484	0.065137	0.283	0.25	1
FBgn0001233	CG1242	Hsp83	0.60575	0.342091	0.717	0.668	1
FBgn0262869	CG43224	Gfrl	0.609756	0.227039	0.461	0.384	1
FBgn0262509	CG43079	nrm	0.626393	0.0650038	0.237	0.2	1
FBgn0264574	CG43946	Glut1	0.629491	0.0837039	0.366	0.339	1
FBgn0038839	CG10830	Ktl	0.636958	0.036977	0.306	0.293	1
FBgn0010114	CG2040	hig	0.64294	0.556499	0.599	0.49	1
FBgn0035092	CG3441	Nplp1	0.644099	0.0599583	0.299	0.281	1
FBgn0030574	CG9413	sbm	0.645609	0.0557916	0.231	0.198	1
FBgn0005771	CG4491	noc	0.648314	0.0386526	0.171	0.139	1
FBgn0034978	CG3257	CG3257	0.655612	0.0409784	0.173	0.148	1
FBgn0036935	CG14186	CG14186	0.660258	0.0607319	0.234	0.194	1
FBgn0085432	CG34403	pan	0.665728	0.347801	0.737	0.674	1
FBgn0261788	CG42734	Ank2	0.667412	1.07732	0.826	0.755	1
FBgn0262508	CG43078	CG43078	0.674015	0.0278208	0.116	0.093	1
FBgn0285952	CG3186	eEF5	0.676387	0.109291	0.36	0.294	1
FBgn0053543	CG33543	CG33543	0.67918	0.566175	0.483	0.373	1
FBgn0016797	CG9739	fz2	0.692092	0.172162	0.336	0.27	1
FBgn0038282	CG33485	dpr9	0.695773	0.532894	0.509	0.372	1
FBgn0010415	CG10497	Sdc	0.715349	0.408616	0.678	0.606	1
FBgn0000273	CG4379	Pka-C1	0.715383	0.591319	0.657	0.53	1
FBgn0086778	CG32538	nAChRalpha7	0.715902	0.576228	0.664	0.573	1
FBgn0001297	CG33956	kay	0.721998	0.0300422	0.127	0.105	1
FBgn0010300	CG10719	brat	0.724096	0.153485	0.365	0.304	1
FBgn0267668	CR46006	lncRNA:CR46006	0.724418	0.0214833	0.133	0.118	1
FBgn0039064	CG4467	CG4467	0.73251	0.269588	0.518	0.414	1
FBgn0259821	CG42402	CG42402	0.735007	0.127857	0.391	0.352	1
FBgn0039617	CG14521	DIP-gamma	0.740331	0.0579713	0.24	0.2	1
FBgn0038156	CG14372	side-IV	0.754994	0.0114434	0.109	0.101	1
FBgn0285948	CG15442	RpL27A	0.766839	0.22222	0.788	0.783	1
FBgn0261549	CG42667	rdgA	0.803467	0.136962	0.324	0.265	1
FBgn0033403	CG13739	CG13739	0.804329	0.439884	0.453	0.318	1
FBgn0260657	CG42540	CG42540	0.808891	0.40263	0.658	0.605	1
FBgn0083975	CG34139	Nlg4	0.809423	0.0452125	0.22	0.186	1
FBgn0024963	CG7535	GluClalpha	0.813476	0.86197	0.737	0.623	1
FBgn0028888	CG4168	CG4168	0.819515	0.0310219	0.127	0.107	1
FBgn0259234	CG42332	Camta	0.8299	0.062376	0.222	0.183	1
FBgn0262782	CG5362	Mdh1	0.831031	0.0741551	0.265	0.22	1
FBgn0039647	CG14509	jus	0.832998	0.263524	0.447	0.335	1
FBgn0083963	CG34127	Nlg3	0.844445	0.304594	0.566	0.465	1
FBgn0028496	CG30116	CG30116	0.847522	0.201879	0.387	0.306	1
FBgn0259171	CG42276	Pde9	0.852007	0.468197	0.577	0.469	1
FBgn0037525	CG17816	CG17816	0.855205	0.417472	0.627	0.507	1
FBgn0035170	CG12191	dpr20	0.857107	0.0185309	0.111	0.101	1
FBgn0085380	CG34351	CG34351	0.857895	0.0253013	0.115	0.094	1
FBgn0264006	CG43749	dysc	0.861007	0.649198	0.797	0.732	1
FBgn0031632	CG15628	CG15628	0.862123	0.310001	0.591	0.5	1
FBgn0260442	CG6831	rhea	0.869217	0.0273425	0.154	0.126	1
FBgn0004514	CG7485	Oct-TyrR	0.874584	0.046361	0.157	0.132	1
FBgn0004880	CG1130	scrt	0.882546	0.856914	0.877	0.846	1
FBgn0036494	CG7250	Toll-6	0.885435	0.585381	0.526	0.376	1
FBgn0034731	CG10384	CG10384	0.886955	0.0377621	0.163	0.134	1
FBgn0250910	CG42244	Octbeta3R	0.898504	0.0435093	0.203	0.168	1
FBgn0003435	CG9218	sm	0.909904	1.6649	0.907	0.889	1
FBgn0267428	CG45781	DIP-lambda	0.916163	0.016063	0.123	0.114	1
FBgn0039380	CG5890	CG5890	0.94514	0.0661145	0.252	0.222	1
FBgn0259111	CG42253	Ndae1	0.947081	0.0359697	0.14	0.114	1
FBgn0003429	CG10693	slo	0.95246	0.555614	0.699	0.625	1
FBgn0038321	CG6218	CG6218	0.955298	0.0254399	0.115	0.089	1
FBgn0263397	CG8585	Ih	0.969291	2.21237	0.904	0.818	1
FBgn0004242	CG3139	Syt1	0.970993	1.24853	0.896	0.882	1
FBgn0261597	CG10305	RpS26	0.984019	0.387824	0.813	0.82	1
FBgn0038246	CG14853	CG14853	0.991007	0.029972	0.146	0.123	1

## Sheet: Male_C2
FlyBaseID	GeneID	Gene symbol	p_val	avg_diff	pct.1	pct.2	p_val_adj
FBgn0019660	CR32665	lncRNA:roX2	0	-2.10422	0.009	0.737	0
FBgn0004047	CG11129	Yp3	3.33099e-157	0.201673	0.169	0.003	4.99649e-154
FBgn0058469	CR40469	lncRNA:CR40469	2.21627e-52	0.146331	0.184	0.06	3.32441e-49
FBgn0087002	CG11064	apolpp	3.16183e-47	0.16184	0.19	0.072	4.74275e-44
FBgn0260429	CG42524	CG42524	9.78865e-39	0.175229	0.25	0.122	1.4683e-35
FBgn0267519	CR45859	28SrRNA-Psi:CR45859	1.09984e-37	-0.07805	0.064	0.127	1.64976e-34
FBgn0050115	CG30115	GEFmeso	2.03736e-37	0.13538	0.185	0.082	3.05604e-34
FBgn0285926	CG1691	Imp	2.397e-34	0.938701	0.449	0.214	3.5955e-31
FBgn0250867	CG42238	CG42238	2.0413e-31	0.222161	0.313	0.153	3.06195e-28
FBgn0002543	CG5481	robo2	2.23744e-31	0.206971	0.223	0.109	3.35617e-28
FBgn0267431	CG45784	Myo81F	1.61601e-25	0.0895432	0.154	0.08	2.42401e-22
FBgn0052066	CG32066	CG32066	2.83276e-25	0.134542	0.236	0.135	4.24914e-22
FBgn0037963	CG6977	Cad87A	1.53898e-24	0.113524	0.18	0.1	2.30847e-21
FBgn0019662	CG8593	qm	4.49968e-24	0.134618	0.232	0.13	6.74952e-21
FBgn0029768	CG16752	SPR	4.73622e-23	0.411535	0.333	0.161	7.10434e-20
FBgn0001090	CG7088	bnb	1.56938e-21	0.0673193	0.104	0.045	2.35406e-18
FBgn0260971	CG42594	CG42594	1.64712e-20	0.472378	0.424	0.211	2.47068e-17
FBgn0264090	CG43759	CG43759	2.44892e-20	0.276213	0.34	0.213	3.67339e-17
FBgn0036821	CG3961	CG3961	2.59649e-20	0.0548135	0.101	0.054	3.89473e-17
FBgn0052626	CG32626	AMPdeam	4.39939e-20	0.150579	0.255	0.142	6.59909e-17
FBgn0083228	CG5907	Frq2	7.95238e-20	0.638233	0.572	0.352	1.19286e-16
FBgn0011693	CG4899	Pdh	9.09824e-20	-0.0861774	0.047	0.101	1.36474e-16
FBgn0052982	CG32982	CG32982	9.60094e-20	0.22903	0.283	0.159	1.44014e-16
FBgn0259677	CG42346	CG42346	1.17506e-18	0.140537	0.222	0.128	1.7626e-15
FBgn0052683	CG32683	CG32683	5.61102e-18	0.193052	0.304	0.187	8.41653e-15
FBgn0031299	CG4629	CG4629	1.01676e-17	0.120061	0.205	0.117	1.52514e-14
FBgn0263049	CR43344	lncRNA:let7C	1.87824e-17	0.0643418	0.119	0.065	2.81736e-14
FBgn0051690	CG31690	CG31690	3.02446e-17	0.266763	0.363	0.222	4.53669e-14
FBgn0033159	CG17800	Dscam1	3.98505e-17	0.160095	0.33	0.231	5.97757e-14
FBgn0052057	CG32057	dpr10	6.52544e-17	0.244796	0.305	0.174	9.78815e-14
FBgn0285963	CG46339	CG46339	1.03222e-16	0.095442	0.217	0.142	1.54833e-13
FBgn0020621	CG2049	Pkn	1.28608e-16	0.0982565	0.186	0.103	1.92913e-13
FBgn0029939	CG9650	CG9650	1.30692e-16	0.292312	0.204	0.089	1.96038e-13
FBgn0002945	CG11614	nkd	2.59615e-16	0.359272	0.411	0.244	3.89422e-13
FBgn0261260	CG42611	mgl	2.84927e-16	0.116462	0.228	0.145	4.27391e-13
FBgn0015766	CG10596	Msr-110	7.79943e-16	0.0721508	0.119	0.054	1.16991e-12
FBgn0033987	CG12424	ckn	1.38208e-15	0.0900478	0.23	0.157	2.07311e-12
FBgn0035050	CG4871	SiaT	2.24601e-15	0.0809549	0.101	0.05	3.36902e-12
FBgn0087012	CG1056	5-HT2A	2.40396e-15	0.135255	0.184	0.102	3.60593e-12
FBgn0283499	CG18402	InR	2.5701e-15	0.137691	0.285	0.183	3.85515e-12
FBgn0004607	CG1449	zfh2	6.14679e-15	0.256821	0.208	0.111	9.22018e-12
FBgn0004619	CG8442	GluRIA	1.11844e-14	0.440746	0.423	0.251	1.67767e-11
FBgn0040153	CG32597	l(1)G0469	3.88215e-14	0.0648821	0.142	0.089	5.82322e-11
FBgn0024150	CG10564	Ac78C	4.58727e-14	0.0618039	0.106	0.061	6.88091e-11
FBgn0031738	CG9171	CG9171	5.3294e-14	0.108782	0.192	0.103	7.9941e-11
FBgn0013718	CG33991	nuf	7.79171e-14	0.0746075	0.156	0.091	1.16876e-10
FBgn0000547	CG12676	ed	8.52687e-14	0.23618	0.324	0.199	1.27903e-10
FBgn0086604	CG12484	side-VIII	1.02908e-13	0.243536	0.328	0.209	1.54362e-10
FBgn0036789	CG13702	AstC-R2	1.06235e-13	0.233212	0.246	0.149	1.59353e-10
FBgn0036801	CG6896	MYPT-75D	1.18126e-13	0.209036	0.349	0.234	1.77189e-10
FBgn0267322	CR45758	lncRNA:CR45758	2.06207e-13	0.118892	0.244	0.158	3.0931e-10
FBgn0030158	CG9686	CG9686	2.73751e-13	0.0873389	0.144	0.078	4.10626e-10
FBgn0011818	CG9884	oaf	1.07573e-12	0.0907319	0.192	0.12	1.61359e-09
FBgn0004573	CG12073	5-HT7	3.28246e-12	0.0749623	0.195	0.145	4.92369e-09
FBgn0001234	CR31400	lncRNA:Hsromega	7.9926e-12	3.25279	0.992	0.993	1.19889e-08
FBgn0028370	CG4192	kek3	8.3863e-12	0.0744807	0.183	0.125	1.25795e-08
FBgn0051361	CG31361	dpr17	8.50156e-12	0.171264	0.25	0.152	1.27523e-08
FBgn0066101	CG31094	LpR1	1.02627e-11	0.155008	0.298	0.203	1.5394e-08
FBgn0040532	CG8369	CG8369	1.4267e-11	0.131667	0.223	0.137	2.14005e-08
FBgn0001224	CG4463	Hsp23	1.44368e-11	0.130125	0.259	0.184	2.16552e-08
FBgn0004882	CG10868	orb	1.64405e-11	0.0677669	0.14	0.083	2.46608e-08
FBgn0029824	CG3726	CG3726	1.91826e-11	0.180163	0.253	0.145	2.8774e-08
FBgn0033405	CG13954	CG13954	2.68756e-11	0.301674	0.39	0.245	4.03133e-08
FBgn0004652	CG14307	fru	2.91422e-11	0.413579	0.36	0.168	4.37134e-08
FBgn0031530	CG3254	Pgant2	3.12183e-11	0.182413	0.243	0.145	4.68274e-08
FBgn0001226	CG4466	Hsp27	3.33663e-11	0.0781224	0.195	0.151	5.00494e-08
FBgn0024321	CG8524	NK7.1	4.94972e-11	0.107819	0.251	0.175	7.42457e-08
FBgn0267033	CG45477	mamo	5.91272e-11	2.09389	0.596	0.367	8.86908e-08
FBgn0053639	CG33639	CG33639	6.88889e-11	0.0645067	0.127	0.071	1.03333e-07
FBgn0283651	CG46301	CG46301	7.63591e-11	0.146092	0.297	0.221	1.14539e-07
FBgn0262473	CG5490	Tl	8.84671e-11	0.102148	0.203	0.132	1.32701e-07
FBgn0259216	CG42316	RhoGAP102A	1.47483e-10	-0.02847	0.108	0.13	2.21225e-07
FBgn0085397	CG34368	Fili	1.68187e-10	0.120486	0.173	0.097	2.5228e-07
FBgn0262614	CG43140	pyd	1.95817e-10	0.206686	0.291	0.199	2.93725e-07
FBgn0052521	CG32521	CG32521	2.12665e-10	0.0874129	0.163	0.101	3.18998e-07
FBgn0262636	CG2052	dati	2.52369e-10	0.0406944	0.39	0.383	3.78554e-07
FBgn0263772	CG43689	CG43689	3.27784e-10	0.252164	0.157	0.1	4.91675e-07
FBgn0003499	CG7847	sr	3.29927e-10	0.129114	0.285	0.212	4.94891e-07
FBgn0264753	CG44011	Rgk1	3.4091e-10	0.175498	0.226	0.127	5.11365e-07
FBgn0051324	CG31324	CG31324	3.525e-10	0.170587	0.26	0.152	5.2875e-07
FBgn0263773	CG43690	fok	4.05042e-10	0.17066	0.291	0.176	6.07563e-07
FBgn0085426	CG34397	Rgk3	6.06899e-10	0.112267	0.181	0.117	9.10348e-07
FBgn0051475	CG31475	CG31475	1.13899e-09	0.0735347	0.147	0.094	1.70848e-06
FBgn0030913	CG6123	CG6123	1.33714e-09	0.315288	0.417	0.305	2.00571e-06
FBgn0003301	CG9533	rut	1.85387e-09	0.147325	0.295	0.191	2.7808e-06
FBgn0263706	CG43658	CG43658	1.85855e-09	0.154186	0.247	0.145	2.78782e-06
FBgn0013995	CG5685	Calx	2.18514e-09	0.301621	0.388	0.265	3.27772e-06
FBgn0030272	CG15201	CG15201	3.04789e-09	0.113611	0.18	0.109	4.57183e-06
FBgn0051191	CG31191	CG31191	3.37334e-09	0.0494139	0.15	0.109	5.06002e-06
FBgn0038542	CG7431	TyrR	3.46815e-09	0.0781842	0.141	0.098	5.20223e-06
FBgn0040877	CG12994	CG12994	3.86342e-09	0.0805456	0.125	0.07	5.79513e-06
FBgn0004395	CG4620	unk	3.89025e-09	0.138055	0.266	0.174	5.83538e-06
FBgn0001229	CG4190	Hsp67Bc	5.08573e-09	0.0996399	0.324	0.269	7.62859e-06
FBgn0264273	CG33960	Sema2b	5.97358e-09	0.15078	0.336	0.27	8.96036e-06
FBgn0040823	CG14162	dpr6	6.25275e-09	0.181876	0.362	0.271	9.37912e-06
FBgn0050419	CG30419	CG30419	6.41598e-09	0.101178	0.207	0.148	9.62397e-06
FBgn0001078	CG4059	ftz-f1	6.69498e-09	0.11361	0.31	0.222	1.00425e-05
FBgn0000097	CG3166	aop	7.98542e-09	0.153122	0.289	0.189	1.19781e-05
FBgn0051774	CG31774	fred	8.11911e-09	0.129685	0.267	0.179	1.21787e-05
FBgn0050463	CG30463	Pgant9	8.85725e-09	0.240729	0.322	0.197	1.32859e-05
FBgn0025525	CG9102	bab2	9.08367e-09	0.0649052	0.161	0.123	1.36255e-05
FBgn0263219	CG42330	Dscam4	1.13684e-08	0.192211	0.342	0.238	1.70525e-05
FBgn0052698	CG32698	CARPB	1.92723e-08	0.194299	0.19	0.116	2.89084e-05
FBgn0037913	CG6783	fabp	2.08268e-08	0.0911776	0.237	0.162	3.12403e-05
FBgn0037521	CG2993	CG2993	2.60752e-08	0.148703	0.422	0.333	3.91128e-05
FBgn0261090	CG42333	Sytbeta	3.89191e-08	0.112603	0.268	0.203	5.83786e-05
FBgn0019985	CG11144	mGluR	4.62274e-08	0.21627	0.385	0.295	6.93412e-05
FBgn0036725	CG18265	CG18265	5.36064e-08	0.0482726	0.11	0.065	8.04096e-05
FBgn0033446	CG1648	CG1648	6.75378e-08	0.089889	0.26	0.199	0.000101307
FBgn0038980	CG6919	Octbeta1R	8.47122e-08	0.113498	0.228	0.152	0.000127068
FBgn0051814	CG31814	DIP-kappa	8.76289e-08	0.166542	0.191	0.122	0.000131443
FBgn0002940	CG4550	ninaE	9.17124e-08	-0.217864	0.161	0.252	0.000137569
FBgn0031971	CG7224	Sirup	1.0207e-07	0.0999605	0.192	0.12	0.000153105
FBgn0013733	CG18076	shot	1.02711e-07	0.155493	0.386	0.288	0.000154066
FBgn0085385	CG34356	bma	1.13623e-07	0.129849	0.361	0.309	0.000170434
FBgn0015519	CG2302	nAChRalpha3	1.22171e-07	0.176721	0.316	0.213	0.000183257
FBgn0085412	CG34383	kmr	1.26799e-07	0.173321	0.347	0.248	0.000190198
FBgn0038641	CG7708	ChT	1.37002e-07	0.0847648	0.368	0.319	0.000205503
FBgn0053517	CG33517	Dop2R	1.45431e-07	2.74467	0.915	0.875	0.000218146
FBgn0085409	CG34380	smal	1.73258e-07	0.128859	0.334	0.253	0.000259888
FBgn0037475	CG33323	Fer1	1.73812e-07	0.0266528	0.123	0.101	0.000260717
FBgn0000567	CG32180	Eip74EF	1.79644e-07	0.0634794	0.135	0.078	0.000269466
FBgn0035495	CG14989	CG14989	1.80509e-07	0.816354	0.37	0.287	0.000270763
FBgn0020269	CG10145	mspo	1.83114e-07	0.216347	0.347	0.249	0.000274671
FBgn0086680	CG10037	vvl	2.18696e-07	0.329313	0.207	0.131	0.000328044
FBgn0260658	CG42541	CG42541	2.84989e-07	0.134277	0.64	0.581	0.000427483
FBgn0015777	CG9261	nrv2	3.50425e-07	0.0613115	0.181	0.13	0.000525638
FBgn0037015	CG13253	cmpy	3.61576e-07	0.208669	0.384	0.273	0.000542364
FBgn0283451	CG11491	br	4.09454e-07	0.10943	0.212	0.162	0.000614181
FBgn0264442	CG43860	ab	4.31725e-07	0.148362	0.292	0.202	0.000647587
FBgn0010452	CG11280	trn	4.64436e-07	0.220291	0.276	0.185	0.000696654
FBgn0053087	CG33087	LRP1	4.75044e-07	0.0595049	0.144	0.096	0.000712567
FBgn0250869	CG42240	CG42240	4.91869e-07	0.038244	0.109	0.076	0.000737804
FBgn0261698	CG42732	SLO2	5.83085e-07	0.175344	0.34	0.253	0.000874628
FBgn0243512	CG7850	puc	6.03906e-07	0.0644576	0.152	0.101	0.000905859
FBgn0085399	CG34370	CG34370	6.44427e-07	0.0739234	0.174	0.118	0.00096664
FBgn0032666	CG5758	CG5758	7.66684e-07	0.319899	0.421	0.267	0.00115003
FBgn0028888	CG4168	CG4168	7.7927e-07	0.0296279	0.158	0.126	0.0011689
FBgn0051092	CG31092	LpR2	9.11314e-07	0.0530228	0.161	0.119	0.00136697
FBgn0266429	CG2872	AstA-R1	9.98126e-07	0.0566826	0.123	0.076	0.00149719
FBgn0034897	CG11299	Sesn	1.05133e-06	0.0540519	0.125	0.087	0.001577
FBgn0000659	CG10002	fkh	1.1774e-06	0.140386	0.141	0.093	0.00176609
FBgn0000287	CG4881	salr	1.60999e-06	0.118873	0.101	0.058	0.00241499
FBgn0000636	CG5803	Fas3	1.7264e-06	0.16595	0.294	0.212	0.0025896
FBgn0260941	CG42318	app	1.73367e-06	0.120795	0.228	0.149	0.0026005
FBgn0053696	CG33696	CNMaR	1.96894e-06	0.122596	0.162	0.108	0.00295341
FBgn0264339	CG43795	CG43795	1.96927e-06	-0.000999234	0.204	0.192	0.0029539
FBgn0027608	CG2082	CG2082	2.06554e-06	0.229699	0.401	0.294	0.00309832
FBgn0024841	CG1963	Pcd	2.23411e-06	0.15258	0.361	0.28	0.00335116
FBgn0028369	CG3653	kirre	2.35402e-06	0.203121	0.402	0.303	0.00353103
FBgn0001225	CG4183	Hsp26	2.39117e-06	0.0217571	0.209	0.183	0.00358675
FBgn0085420	CG34391	DIP-delta	2.77658e-06	0.175584	0.304	0.225	0.00416486
FBgn0000037	CG4356	mAChR-A	3.0204e-06	0.256091	0.546	0.425	0.00453059
FBgn0040397	CG3655	CG3655	3.28128e-06	0.0679683	0.191	0.138	0.00492191
FBgn0085370	CG34341	Pde11	3.42196e-06	0.0855499	0.185	0.129	0.00513295
FBgn0030505	CG11172	NFAT	3.84318e-06	0.298515	0.485	0.344	0.00576477
FBgn0051760	CG31760	CG31760	5.61083e-06	0.130646	0.289	0.206	0.00841624
FBgn0262782	CG5362	Mdh1	6.23022e-06	0.0511956	0.167	0.121	0.00934532
FBgn0015774	CG10521	NetB	7.58893e-06	0.241363	0.345	0.252	0.0113834
FBgn0033438	CG1794	Mmp2	7.68214e-06	-0.0103297	0.27	0.242	0.0115232
FBgn0050361	CG30361	mtt	7.84175e-06	0.0631636	0.197	0.158	0.0117626
FBgn0261258	CG6014	rgn	7.87386e-06	0.0908127	0.29	0.234	0.0118108
FBgn0261588	CG42698	pdm3	9.55024e-06	0.115638	0.333	0.3	0.0143254
FBgn0000116	CG32031	Argk	9.61828e-06	0.5467	0.771	0.706	0.0144274
FBgn0085382	CG34353	CG34353	9.88809e-06	0.151602	0.33	0.232	0.0148321
FBgn0085390	CG34361	Dgk	1.11853e-05	0.044027	0.119	0.078	0.016778
FBgn0085407	CG34378	Pvf3	1.45617e-05	0.650609	0.581	0.446	0.0218425
FBgn0263131	CG43373	CG43373	1.45917e-05	0.0279863	0.118	0.091	0.0218875
FBgn0264308	CG43778	CG43778	1.48312e-05	0.104571	0.334	0.268	0.0222468
FBgn0033268	CG2297	Obp44a	1.6231e-05	0.25105	0.262	0.166	0.0243464
FBgn0267253	CG32700	CG32700	1.62524e-05	0.345078	0.448	0.326	0.0243786
FBgn0000042	CG4027	Act5C	2.21094e-05	0.552482	0.84	0.8	0.033164
FBgn0259243	CG42341	Pka-R1	2.33426e-05	0.17293	0.448	0.371	0.0350139
FBgn0027589	CG1688	CG1688	2.33833e-05	0.106081	0.225	0.161	0.035075
FBgn0261871	CG33507	dpr2	2.8359e-05	0.0842819	0.192	0.131	0.0425385
FBgn0031897	CG13784	CG13784	2.85662e-05	0.10485	0.313	0.244	0.0428493
FBgn0261999	CG42817	Ca-Ma2d	2.88219e-05	0.0929539	0.272	0.21	0.0432329
FBgn0051708	CG31708	DIP-zeta	3.03832e-05	0.0624958	0.103	0.072	0.0455748
FBgn0039816	CG11317	CG11317	3.68356e-05	0.101627	0.229	0.165	0.0552535
FBgn0259170	CG42275	alpha-Man-Ia	4.13124e-05	0.065713	0.242	0.188	0.0619686
FBgn0259242	CG42340	CG42340	4.25715e-05	0.123546	0.306	0.227	0.0638573
FBgn0262160	CG9932	CG9932	4.49258e-05	0.128163	0.313	0.247	0.0673887
FBgn0001085	CG17697	fz	4.52672e-05	0.110793	0.244	0.18	0.0679007
FBgn0051345	CG31345	CG31345	4.80845e-05	0.0705286	0.141	0.09	0.0721268
FBgn0005636	CG3385	nvy	5.11357e-05	0.0303368	0.156	0.129	0.0767036
FBgn0284245	CG8280	eEF1alpha1	5.52987e-05	0.159248	0.34	0.236	0.082948
FBgn0086359	CG3953	Invadolysin	5.53329e-05	0.0890794	0.235	0.166	0.0829993
FBgn0012344	CG8348	Dh44	5.7693e-05	0.0937531	0.106	0.068	0.0865396
FBgn0004168	CG16720	5-HT1A	5.91693e-05	0.228534	0.333	0.236	0.088754
FBgn0011661	CG10701	Moe	6.58733e-05	0.125631	0.319	0.241	0.09881
FBgn0261509	CG14351	haf	7.00168e-05	0.169177	0.215	0.152	0.105025
FBgn0035041	CG13594	CG13594	7.55542e-05	0.0487335	0.155	0.116	0.113331
FBgn0085384	CG34355	CG34355	8.25718e-05	0.119705	0.234	0.164	0.123858
FBgn0039647	CG14509	jus	8.62769e-05	0.137141	0.49	0.412	0.129415
FBgn0261988	CG17998	Gprk2	8.63729e-05	0.479346	0.539	0.356	0.129559
FBgn0000422	CG10697	Ddc	8.86851e-05	0.0560533	0.613	0.606	0.133028
FBgn0014859	CG1864	Hr38	9.8647e-05	0.235718	0.366	0.281	0.14797
FBgn0037153	CG12673	olf413	9.9447e-05	0.176432	0.387	0.31	0.14917
FBgn0030574	CG9413	sbm	0.000101244	0.086439	0.219	0.156	0.151866
FBgn0052204	CG32204	CG32204	0.00010147	0.0636541	0.158	0.111	0.152204
FBgn0028645	CG7644	beat-Ib	0.000105408	0.150291	0.374	0.306	0.158112
FBgn0261046	CG31190	Dscam3	0.000111614	0.0538804	0.247	0.217	0.167422
FBgn0033368	CG13743	CG13743	0.000129779	0.102287	0.274	0.213	0.194669
FBgn0015229	CG6575	glec	0.000134585	0.467645	0.464	0.239	0.201878
FBgn0044328	CG32052	CG32052	0.000139563	0.197731	0.365	0.281	0.209345
FBgn0025360	CG18455	Optix	0.000153207	0.150696	0.187	0.152	0.229811
FBgn0264794	CR44024	lncRNA:CR44024	0.000166201	0.0303588	0.284	0.274	0.249301
FBgn0034408	CG12758	sano	0.000166313	0.0437826	0.125	0.093	0.24947
FBgn0033192	CG2105	Corin	0.000168915	0.177171	0.349	0.248	0.253372
FBgn0051163	CG31163	SKIP	0.000173544	0.432909	0.463	0.324	0.260316
FBgn0040765	CG33473	luna	0.000191033	0.497059	0.481	0.324	0.286549
FBgn0250908	CG42242	beat-VII	0.000200805	0.285274	0.526	0.448	0.301207
FBgn0019650	CG11186	toy	0.000203629	0.0107062	0.297	0.29	0.305444
FBgn0003429	CG10693	slo	0.000206635	0.497579	0.721	0.643	0.309952
FBgn0039420	CG6154	CG6154	0.000221913	0.0990606	0.227	0.171	0.332869
FBgn0261285	CG5629	Ppcs	0.000221993	0.162693	0.3	0.215	0.332989
FBgn0002643	CG8118	mam	0.000245056	0.0946731	0.286	0.222	0.367584
FBgn0026428	CG6170	HDAC6	0.000245101	0.0316103	0.135	0.104	0.367652
FBgn0040726	CG13439	dpr1	0.000259524	0.18638	0.391	0.311	0.389286
FBgn0031016	CG12199	kek5	0.000263956	0.0526777	0.149	0.105	0.395934
FBgn0036144	CG6207	GlcAT-P	0.000274632	0.0725972	0.243	0.203	0.411949
FBgn0039209	CG13624	REPTOR	0.000280997	0.136311	0.303	0.22	0.421495
FBgn0032629	CG15138	beat-IIIc	0.000281232	0.47455	0.443	0.321	0.421848
FBgn0031424	CG9887	VGlut	0.000283337	0.290821	0.186	0.12	0.425006
FBgn0028875	CG32975	nAChRalpha5	0.00030072	0.825895	0.851	0.799	0.45108
FBgn0264975	CG1634	Nrg	0.000303301	0.123295	0.28	0.208	0.454951
FBgn0039380	CG5890	CG5890	0.000326253	0.0886289	0.301	0.241	0.489379
FBgn0265595	CG44422	CG44422	0.000334915	0.319035	0.404	0.264	0.502373
FBgn0036043	CG8177	CG8177	0.000391892	0.13247	0.392	0.335	0.587837
FBgn0263930	CG4974	dally	0.000393079	0.249499	0.33	0.212	0.589619
FBgn0052406	CG32406	PVRAP	0.000403179	0.0643649	0.162	0.114	0.604769
FBgn0264908	CG44099	pHCl-1	0.000410065	0.0199627	0.3	0.298	0.615097
FBgn0035173	CG13907	CG13907	0.000465726	0.0434545	0.111	0.075	0.698588
FBgn0031770	CG13995	CG13995	0.000475618	0.162865	0.36	0.277	0.713428
FBgn0085413	CG34384	CG34384	0.000489547	0.160044	0.325	0.245	0.73432
FBgn0052432	CG32432	CG32432	0.000493017	0.0483321	0.219	0.174	0.739525
FBgn0051721	CG31721	Trim9	0.00049839	0.0265496	0.134	0.106	0.747585
FBgn0010114	CG2040	hig	0.000503686	0.417794	0.588	0.507	0.755529
FBgn0037941	CG12594	CG12594	0.000515825	0.130907	0.224	0.164	0.773738
FBgn0051646	CG31646	DIP-theta	0.000520399	0.170014	0.245	0.188	0.780598
FBgn0284243	CG9277	betaTub56D	0.000524984	0.301137	0.477	0.356	0.787476
FBgn0039770	CG15537	CG15537	0.000565287	0.137307	0.116	0.085	0.84793
FBgn0004885	CG6863	tok	0.000615066	0.0421034	0.147	0.12	0.922599
FBgn0263980	CG43729	Stacl	0.000641501	0.436655	0.742	0.691	0.962252
FBgn0021764	CG5227	sdk	0.000740214	0.0777027	0.132	0.087	1
FBgn0261649	CG31247	tinc	0.000823773	0.0601514	0.163	0.115	1
FBgn0039349	CG4685	Ssadh	0.000851166	0.0147509	0.157	0.145	1
FBgn0038929	CG13408	CG13408	0.000928911	0.0374048	0.132	0.1	1
FBgn0264006	CG43749	dysc	0.000952763	0.487629	0.821	0.781	1
FBgn0261113	CG17836	Xrp1	0.00106733	0.108506	0.299	0.235	1
FBgn0267337	CG42277	rn	0.00113305	0.0568645	0.108	0.073	1
FBgn0004595	CG17228	pros	0.00124291	5.79312	0.871	0.842	1
FBgn0259213	CG42313	side-II	0.0013018	0.168065	0.439	0.363	1
FBgn0028704	CG18660	Nckx30C	0.00132706	0.523436	0.704	0.646	1
FBgn0027356	CG8604	Amph	0.00138107	0.0750095	0.195	0.134	1
FBgn0001297	CG33956	kay	0.00138333	0.0348438	0.123	0.092	1
FBgn0031294	CG31795	IA-2	0.00144918	8.84123	0.995	0.994	1
FBgn0029663	CG10804	CG10804	0.00146453	0.209443	0.3	0.169	1
FBgn0002023	CG10699	Lim3	0.00152434	0.074257	0.129	0.093	1
FBgn0033358	CG8216	spab	0.00156268	0.0767641	0.473	0.422	1
FBgn0010300	CG10719	brat	0.0015669	0.25001	0.538	0.454	1
FBgn0052506	CG32506	CG32506	0.00159084	0.0770521	0.346	0.29	1
FBgn0034731	CG10384	CG10384	0.0016104	-0.00112233	0.232	0.218	1
FBgn0033791	CG3915	Drl-2	0.0016113	0.097624	0.23	0.182	1
FBgn0005771	CG4491	noc	0.00163491	0.068004	0.175	0.122	1
FBgn0264000	CG43743	GluRIB	0.00167634	0.518633	0.501	0.347	1
FBgn0033544	CG7220	CG7220	0.00168861	0.0704214	0.276	0.222	1
FBgn0039584	CG14064	beat-VI	0.00191039	0.07053	0.301	0.257	1
FBgn0041097	CG5423	robo3	0.00196212	0.0526232	0.203	0.166	1
FBgn0042696	CG2380	NfI	0.00203057	0.0652181	0.213	0.166	1
FBgn0052206	CG32206	CG32206	0.00216558	0.0910722	0.316	0.261	1
FBgn0052183	CG32183	Ccn	0.00218888	0.113697	0.213	0.151	1
FBgn0285952	CG3186	eEF5	0.00219174	0.0662201	0.365	0.324	1
FBgn0259212	CG42312	cno	0.00232631	0.0237085	0.145	0.119	1
FBgn0034753	CG2852	CG2852	0.00236716	0.146415	0.553	0.526	1
FBgn0053179	CG33179	beat-IIIb	0.00238814	0.114906	0.382	0.315	1
FBgn0037874	CG4800	Tctp	0.00246096	0.09084	0.42	0.386	1
FBgn0011656	CG1429	Mef2	0.00263045	0.211877	0.354	0.244	1
FBgn0037676	CG8861	CG8861	0.00266604	0.0797727	0.292	0.249	1
FBgn0264895	CG44086	RapGAP1	0.00278307	0.605724	0.542	0.422	1
FBgn0031374	CG7337	Wdr62	0.00279813	0.588027	0.599	0.391	1
FBgn0261928	CG42795	CG42795	0.00285892	0.154797	0.292	0.2	1
FBgn0260003	CG34157	Dys	0.0035611	0.0674814	0.227	0.182	1
FBgn0014184	CG16747	Oda	0.00356715	0.579093	0.737	0.687	1
FBgn0024189	CG33141	sns	0.00359522	0.0597705	0.187	0.137	1
FBgn0004198	CG11387	ct	0.00365093	1.03931	0.417	0.25	1
FBgn0027654	CG2239	jdp	0.00383918	1.07621	0.865	0.808	1
FBgn0085753	CR40596	28SrRNA-Psi:CR40596	0.00398221	0.00839008	0.171	0.165	1
FBgn0262509	CG43079	nrm	0.00411283	0.0716233	0.29	0.245	1
FBgn0027339	CG11352	jim	0.00429931	1.36164	0.933	0.937	1
FBgn0085434	CG34405	NaCP60E	0.00432928	0.714701	0.678	0.534	1
FBgn0065099	CR33925	snRNA:7SK	0.00483089	-0.363456	0.887	0.852	1
FBgn0033108	CG15236	CG15236	0.00487093	0.15161	0.371	0.315	1
FBgn0051619	CG31619	nolo	0.00487094	0.121668	0.301	0.246	1
FBgn0267579	CR45919	lncRNA:CR45919	0.00496076	0.028523	0.173	0.148	1
FBgn0052547	CG32547	CG32547	0.00501356	0.0276412	0.102	0.081	1
FBgn0085421	CG34392	Epac	0.00523185	0.0839837	0.31	0.269	1
FBgn0260660	CG42543	Mp	0.00568318	0.27256	0.43	0.33	1
FBgn0027598	CG31012	cindr	0.00578029	0.564841	0.596	0.41	1
FBgn0015400	CG4977	kek2	0.00583268	0.129357	0.44	0.377	1
FBgn0259245	CG42343	DIP-beta	0.00591361	0.0555347	0.154	0.125	1
FBgn0262593	CG43128	Shab	0.00619467	0.272581	0.525	0.431	1
FBgn0003435	CG9218	sm	0.00639085	1.6882	0.929	0.898	1
FBgn0270928	CG32848	VAChT	0.00651347	0.407601	0.701	0.676	1
FBgn0038653	CG18208	Octalpha2R	0.00653059	0.11931	0.39	0.344	1
FBgn0003423	CG1417	slgA	0.00655329	0.233454	0.438	0.362	1
FBgn0038063	CG33976	Octbeta2R	0.00691316	0.282405	0.446	0.346	1
FBgn0034725	CG6044	CG6044	0.00709223	0.0559096	0.396	0.36	1
FBgn0259789	CG12701	zld	0.0076019	0.0588003	0.171	0.145	1
FBgn0031736	CG11030	CG11030	0.00767897	0.0454613	0.29	0.263	1
FBgn0287186	CG17594	scro	0.00778077	0.0366995	0.113	0.086	1
FBgn0032840	CG13968	sNPF	0.00862335	0.42674	0.258	0.197	1
FBgn0285948	CG15442	RpL27A	0.00875419	0.23604	0.771	0.772	1
FBgn0000303	CG12345	ChAT	0.00902982	0.306473	0.607	0.535	1
FBgn0260657	CG42540	CG42540	0.00938982	0.472563	0.759	0.701	1
FBgn0016797	CG9739	fz2	0.00946607	0.135637	0.319	0.248	1
FBgn0266871	CR45332	lncRNA:CR45332	0.00957229	-0.0255149	0.139	0.16	1
FBgn0265194	CG44240	Trpm	0.0097037	0.0503029	0.165	0.128	1
FBgn0264001	CG43744	bru3	0.0100863	1.18471	0.861	0.829	1
FBgn0039346	CG5079	CG5079	0.0103972	0.0203992	0.158	0.132	1
FBgn0000179	CG3578	bi	0.0105115	0.394195	0.315	0.239	1
FBgn0001235	CG17117	hth	0.0105157	0.641667	0.536	0.393	1
FBgn0264503	CG43902	CG43902	0.0109068	0.230285	0.317	0.234	1
FBgn0039064	CG4467	CG4467	0.0111023	0.24686	0.562	0.498	1
FBgn0003274	CG4918	RpLP2	0.0112382	0.243499	0.661	0.628	1
FBgn0028496	CG30116	CG30116	0.0115473	0.29488	0.456	0.345	1
FBgn0266100	CG44837	CG44837	0.011641	0.0508924	0.162	0.128	1
FBgn0035756	CG32381	unc-13-4A	0.0120115	0.239772	0.432	0.367	1
FBgn0036844	CG14080	Mkp3	0.012113	0.376754	0.577	0.464	1
FBgn0086677	CG30040	jeb	0.0128291	1.57246	0.837	0.744	1
FBgn0004509	CG10772	Fur1	0.0133871	0.066784	0.238	0.188	1
FBgn0020907	CG14904	Scp2	0.0134789	0.0751394	0.202	0.171	1
FBgn0030174	CG15312	CG15312	0.0144504	0.102543	0.276	0.215	1
FBgn0004244	CG10537	Rdl	0.0144644	1.74225	0.959	0.933	1
FBgn0039089	CG10152	beat-IV	0.0146129	0.0758556	0.256	0.215	1
FBgn0032048	CG13094	Dh31	0.0158383	0.079164	0.155	0.143	1
FBgn0264574	CG43946	Glut1	0.0164253	0.0800831	0.361	0.313	1
FBgn0016061	CG31062	side	0.0165544	0.360934	0.524	0.416	1
FBgn0262737	CG7437	mub	0.0172749	0.801295	0.755	0.709	1
FBgn0023534	CG17778	CG17778	0.0173255	0.0619543	0.215	0.18	1
FBgn0039617	CG14521	DIP-gamma	0.0178152	0.0560617	0.234	0.184	1
FBgn0085410	CG34381	TrissinR	0.0178254	0.00516565	0.105	0.098	1
FBgn0038498	CG14334	beat-IIa	0.0180521	0.302198	0.364	0.242	1
FBgn0000114	CG31762	bru1	0.0186732	0.0432119	0.112	0.079	1
FBgn0010453	CG4698	Wnt4	0.0195351	0.0972255	0.106	0.08	1
FBgn0031306	CG4577	CG4577	0.0205395	0.164794	0.414	0.375	1
FBgn0011582	CG9652	Dop1R1	0.0205821	0.0760079	0.287	0.258	1
FBgn0010434	CG11949	cora	0.0207591	0.0547045	0.23	0.199	1
FBgn0036494	CG7250	Toll-6	0.0221918	0.564659	0.493	0.319	1
FBgn0031697	CG14024	CG14024	0.0224994	0.0364449	0.303	0.283	1
FBgn0036934	CG7395	sNPF-R	0.0236834	0.0559718	0.117	0.085	1
FBgn0083949	CG34113	side-III	0.0245961	0.445894	0.545	0.412	1
FBgn0266756	CG44012	btsz	0.0246918	0.0488815	0.169	0.143	1
FBgn0001186	CG3001	Hex-A	0.0260729	1.68332	0.752	0.447	1
FBgn0010313	CG2530	corto	0.0269831	0.20648	0.433	0.345	1
FBgn0086758	CG31666	chinmo	0.0282758	0.378262	0.715	0.666	1
FBgn0267336	CG34360	Glut4EF	0.0294431	1.10999	0.788	0.714	1
FBgn0260793	CG42573	2mit	0.0307286	0.0789581	0.226	0.183	1
FBgn0036454	CG17839	CG17839	0.0315648	0.0627615	0.168	0.126	1
FBgn0052017	CG32017	CG32017	0.0316448	0.214987	0.424	0.325	1
FBgn0033484	CG2269	CG2269	0.0322974	1.89372	0.866	0.771	1
FBgn0263353	CG11000	CG11000	0.0332153	0.437956	0.598	0.466	1
FBgn0260943	CG32169	Rbp6	0.0343672	3.24709	0.898	0.823	1
FBgn0023179	CG6438	amon	0.0348999	0.304324	0.51	0.414	1
FBgn0267668	CR46006	lncRNA:CR46006	0.0349366	0.0451853	0.146	0.112	1
FBgn0265487	CG33197	mbl	0.0367472	1.04155	0.653	0.527	1
FBgn0267001	CG42338	Ten-a	0.0371442	2.21258	0.918	0.819	1
FBgn0028407	CG8364	Drep3	0.0387491	0.041127	0.104	0.074	1
FBgn0083963	CG34127	Nlg3	0.0389518	0.229242	0.619	0.561	1
FBgn0004910	CG15855	Eip63F-1	0.0394102	0.069545	0.15	0.108	1
FBgn0261836	CG42768	Msp300	0.0394601	1.52397	0.841	0.73	1
FBgn0033403	CG13739	CG13739	0.040128	0.401901	0.391	0.248	1
FBgn0025682	CG9148	scf	0.0417589	0.0237121	0.124	0.107	1
FBgn0053202	CG33202	dpr11	0.042059	0.085604	0.302	0.259	1
FBgn0032901	CG9339	sky	0.0424302	0.124298	0.462	0.414	1
FBgn0004514	CG7485	Oct-TyrR	0.0432165	0.0539118	0.158	0.123	1
FBgn0085383	CG34354	CG34354	0.0450314	0.179399	0.392	0.336	1
FBgn0052647	CG32647	CG32647	0.0460677	0.0996465	0.255	0.198	1
FBgn0015609	CG7100	CadN	0.0466471	0.234028	0.574	0.529	1
FBgn0025885	CG11143	Inos	0.0486863	0.0385588	0.123	0.092	1
FBgn0034636	CG10440	twz	0.0491714	0.0182197	0.14	0.121	1
FBgn0000028	CG9151	acj6	0.0493886	0.310418	0.218	0.188	1
FBgn0000121	CG5962	Arr2	0.0504188	-0.0674653	0.157	0.174	1
FBgn0013981	CG3379	His4r	0.0505477	1.25133	0.976	0.967	1
FBgn0053516	CG33516	dpr3	0.0518974	0.080747	0.183	0.136	1
FBgn0086778	CG32538	nAChRalpha7	0.0533609	0.341624	0.524	0.432	1
FBgn0043364	CG4427	cbt	0.0534263	0.0381743	0.163	0.133	1
FBgn0259244	CG42342	CG42342	0.0546304	0.31666	0.527	0.435	1
FBgn0030897	CG5744	Frq1	0.0555896	0.791603	0.624	0.461	1
FBgn0285944	CG9907	para	0.0556187	1.1925	0.856	0.819	1
FBgn0005775	CG7503	Con	0.0559122	1.22778	0.689	0.507	1
FBgn0266851	CR45312	lncRNA:CR45312	0.0585072	0.042722	0.236	0.203	1
FBgn0264386	CG15899	Ca-alpha1T	0.0593143	0.953407	0.694	0.613	1
FBgn0259234	CG42332	Camta	0.0602752	0.0830672	0.243	0.187	1
FBgn0031414	CG33955	eys	0.0603736	0.284964	0.481	0.41	1
FBgn0015399	CG12283	kek1	0.060868	0.277562	0.522	0.427	1
FBgn0259171	CG42276	Pde9	0.0612062	0.476542	0.681	0.607	1
FBgn0085419	CG34390	Rgk2	0.0625706	0.0159377	0.186	0.176	1
FBgn0262738	CG3620	norpA	0.0633233	0.320077	0.564	0.477	1
FBgn0265002	CG44153	CG44153	0.0641159	-0.00709262	0.244	0.23	1
FBgn0004880	CG1130	scrt	0.0660495	0.630475	0.833	0.817	1
FBgn0001091	CG12055	Gapdh1	0.0668363	0.147866	0.377	0.299	1
FBgn0052600	CG32600	dpr8	0.0668664	0.328175	0.498	0.391	1
FBgn0036927	CG7433	Gabat	0.0669804	0.0474473	0.266	0.247	1
FBgn0085387	CG34358	shakB	0.069365	0.391164	0.559	0.454	1
FBgn0263392	CG43444	Tet	0.070686	0.305938	0.598	0.529	1
FBgn0262508	CG43078	CG43078	0.0779441	0.0260396	0.11	0.089	1
FBgn0259108	CG34387	futsch	0.0780817	2.50878	0.955	0.91	1
FBgn0034286	CG33996	dpr13	0.0791802	0.444369	0.475	0.359	1
FBgn0004369	CG11516	Ptp99A	0.079923	0.911462	0.793	0.635	1
FBgn0032400	CG6770	CG6770	0.0810046	0.932537	0.811	0.644	1
FBgn0011676	CG6713	Nos	0.0813876	0.0200924	0.127	0.116	1
FBgn0029123	CG18024	SoxN	0.0834808	0.337404	0.272	0.17	1
FBgn0038494	CG4135	beat-IIb	0.084525	0.0516353	0.139	0.101	1
FBgn0038084	CG14390	beat-Vc	0.0850673	0.0530834	0.147	0.112	1
FBgn0000108	CG7727	Appl	0.0851601	1.30804	0.883	0.848	1
FBgn0030090	CG12664	fend	0.0859526	0.438955	0.592	0.455	1
FBgn0085432	CG34403	pan	0.0876114	0.40773	0.731	0.694	1
FBgn0267910	CR34335	lncRNA:CR34335	0.0877205	20.7225	0.994	0.936	1
FBgn0028481	CG4341	CG4341	0.0897686	0.0153829	0.241	0.22	1
FBgn0264815	CG44007	Pde1c	0.0910211	0.137128	0.402	0.347	1
FBgn0052677	CG32677	X11Lbeta	0.0937477	0.202786	0.416	0.325	1
FBgn0036851	CG14082	CG14082	0.0945255	-0.0109945	0.104	0.113	1
FBgn0000575	CG1007	emc	0.0990066	0.109519	0.421	0.375	1
FBgn0025382	CG14791	Rab27	0.0993114	0.051719	0.19	0.156	1
FBgn0011666	CG5099	msi	0.106213	0.83437	0.66	0.446	1
FBgn0000273	CG4379	Pka-C1	0.109361	0.640235	0.685	0.561	1
FBgn0010411	CG8900	RpS18	0.110299	0.373793	0.835	0.855	1
FBgn0031855	CG11221	meng	0.11552	0.0237443	0.105	0.086	1
FBgn0030412	CG17762	Tomosyn	0.118183	0.672412	0.685	0.546	1
FBgn0041605	CG32490	cpx	0.119988	1.19476	0.904	0.874	1
FBgn0010412	CG4464	RpS19a	0.120193	0.0915064	0.342	0.293	1
FBgn0286778	CG46385	CG46385	0.120349	0.217752	0.515	0.46	1
FBgn0085400	CG34371	side-V	0.127941	0.066998	0.219	0.179	1
FBgn0038246	CG14853	CG14853	0.128492	0.0232179	0.2	0.182	1
FBgn0261788	CG42734	Ank2	0.132033	0.990734	0.822	0.769	1
FBgn0038321	CG6218	CG6218	0.133799	0.0372586	0.138	0.108	1
FBgn0013973	CG1470	Gycbeta100B	0.134573	0.0560635	0.224	0.184	1
FBgn0000535	CG10952	eag	0.13558	0.106909	0.342	0.292	1
FBgn0262869	CG43224	Gfrl	0.14233	0.181058	0.465	0.396	1
FBgn0026160	CG7958	tna	0.144827	0.498248	0.557	0.402	1
FBgn0003326	CG17579	sca	0.146626	0.0695565	0.167	0.134	1
FBgn0010415	CG10497	Sdc	0.148759	0.503289	0.703	0.635	1
FBgn0085380	CG34351	CG34351	0.149388	0.00447189	0.107	0.098	1
FBgn0010113	CG15532	hdc	0.156118	1.3201	0.748	0.638	1
FBgn0000633	CG17716	CG17716	0.159059	0.621586	0.531	0.393	1
FBgn0261244	CG33174	inaE	0.159342	0.342454	0.455	0.308	1
FBgn0011224	CG31000	heph	0.162264	2.505	0.821	0.741	1
FBgn0002593	CG4087	RpLP1	0.16678	0.542043	0.771	0.676	1
FBgn0264087	CG43756	Slob	0.167585	0.056166	0.245	0.207	1
FBgn0031835	CG11319	CG11319	0.169379	0.10661	0.39	0.345	1
FBgn0031632	CG15628	CG15628	0.177511	0.21763	0.538	0.464	1
FBgn0013467	CG18285	igl	0.178214	0.483966	0.686	0.619	1
FBgn0261804	CG42750	CG42750	0.182841	0.195146	0.435	0.362	1
FBgn0259111	CG42253	Ndae1	0.18334	0.0317395	0.172	0.148	1
FBgn0261556	CG42674	CG42674	0.1847	0.218623	0.317	0.241	1
FBgn0041707	CG1168	7B2	0.191027	0.515186	0.891	0.85	1
FBgn0267252	CG3694	Ggamma30A	0.2006	2.38077	0.931	0.906	1
FBgn0003091	CG6622	Pkc53E	0.209737	0.949637	0.692	0.546	1
FBgn0265182	CG44247	CG44247	0.211776	0.0775015	0.329	0.292	1
FBgn0085391	CG34362	trv	0.212753	1.46549	0.757	0.659	1
FBgn0013954	CG11001	Fkbp12	0.214326	0.234085	0.662	0.614	1
FBgn0083991	CG34155	CG34155	0.217988	0.0563115	0.138	0.112	1
FBgn0038826	CG17838	Syp	0.218253	0.382373	0.543	0.417	1
FBgn0036935	CG14186	CG14186	0.220132	0.0365922	0.205	0.176	1
FBgn0030723	CG14948	dpr18	0.228998	0.0330379	0.172	0.152	1
FBgn0264606	CG43955	Fife	0.229502	0.11127	0.588	0.56	1
FBgn0260462	CG12163	CG12163	0.23	0.0231912	0.176	0.16	1
FBgn0023095	CG11282	caps	0.237109	0.0380949	0.194	0.16	1
FBgn0051665	CG31665	wry	0.239867	0.538977	0.561	0.401	1
FBgn0261549	CG42667	rdgA	0.241408	0.261567	0.507	0.428	1
FBgn0004858	CG4220	elB	0.242979	0.0585523	0.244	0.211	1
FBgn0250910	CG42244	Octbeta3R	0.243635	0.00946105	0.175	0.165	1
FBgn0053543	CG33543	CG33543	0.24711	0.479882	0.475	0.343	1
FBgn0004449	CG5723	Ten-m	0.25549	0.123553	0.393	0.347	1
FBgn0263995	CG43738	cpo	0.257293	0.599408	0.785	0.763	1
FBgn0264490	CG18389	Eip93F	0.265532	0.423794	0.364	0.241	1
FBgn0262018	CG42829	CadN2	0.268383	0.0401968	0.18	0.151	1
FBgn0261262	CG42613	CG42613	0.275169	1.01773	0.706	0.493	1
FBgn0259821	CG42402	CG42402	0.279266	0.142794	0.457	0.42	1
FBgn0032151	CG4128	nAChRalpha6	0.279438	1.93308	0.883	0.781	1
FBgn0034978	CG3257	CG3257	0.29102	0.0277426	0.237	0.225	1
FBgn0265598	CG44425	Bx	0.29155	0.0839739	0.22	0.192	1
FBgn0038087	CG10134	beat-Va	0.296044	0.0203653	0.175	0.154	1
FBgn0003165	CG9755	pum	0.300542	0.768958	0.863	0.828	1
FBgn0083950	CG34114	side-VI	0.302237	0.5308	0.532	0.386	1
FBgn0029897	CG3203	RpL17	0.315631	0.318002	0.665	0.611	1
FBgn0019643	CG3318	AANAT1	0.328293	0.0319366	0.156	0.133	1
FBgn0053143	CG33143	CG33143	0.33711	0.079145	0.355	0.321	1
FBgn0003380	CG12348	Sh	0.337166	1.9786	0.949	0.936	1
FBgn0266418	CG45058	wake	0.34558	0.0231003	0.164	0.149	1
FBgn0028644	CG4838	beat-Ic	0.346523	0.690395	0.519	0.358	1
FBgn0014163	CG4609	fax	0.352756	1.43435	0.813	0.669	1
FBgn0035032	CG4692	ATPsynF	0.35956	0.647192	0.8	0.729	1
FBgn0004611	CG4574	Plc21C	0.360043	0.304443	0.522	0.446	1
FBgn0024944	CG3856	Oamb	0.367522	0.0468038	0.127	0.098	1
FBgn0083975	CG34139	Nlg4	0.375146	0.0613497	0.219	0.183	1
FBgn0035170	CG12191	dpr20	0.377681	0.0183216	0.108	0.093	1
FBgn0032797	CG10186	Hasp	0.38474	0.947611	0.823	0.783	1
FBgn0038156	CG14372	side-IV	0.387756	0.0298892	0.125	0.097	1
FBgn0031275	CG3022	GABA-B-R3	0.391399	0.0260548	0.103	0.085	1
FBgn0263257	CG43395	Cngl	0.403769	1.53396	0.853	0.747	1
FBgn0002868	CG9470	MtnA	0.4046	0.444631	0.395	0.226	1
FBgn0000635	CG3665	Fas2	0.406492	0.471188	0.397	0.248	1
FBgn0265296	CG42256	Dscam2	0.418876	0.926909	0.741	0.671	1
FBgn0010263	CG3151	Rbp9	0.423656	0.440088	0.623	0.542	1
FBgn0053147	CG33147	Hs3st-A	0.426605	0.643037	0.74	0.655	1
FBgn0066084	CG30425	RpL41	0.427345	3.68249	0.896	0.745	1
FBgn0052264	CG32264	CG32264	0.430927	0.843436	0.786	0.7	1
FBgn0261555	CG42673	CG42673	0.441514	0.0328365	0.104	0.08	1
FBgn0013688	CR34096	mt:srRNA	0.443342	0.0199292	0.162	0.149	1
FBgn0260442	CG6831	rhea	0.445917	0.0360761	0.173	0.14	1
FBgn0263994	CG43737	CG43737	0.452333	0.440534	0.58	0.456	1
FBgn0038839	CG10830	Ktl	0.462933	0.0528028	0.374	0.341	1
FBgn0017590	CG6669	klg	0.465316	0.303603	0.57	0.512	1
FBgn0029761	CG10706	SK	0.468113	0.56671	0.669	0.528	1
FBgn0266801	CG45263	CG45263	0.468419	0.215752	0.494	0.435	1
FBgn0000024	CG17907	Ace	0.468707	0.626867	0.668	0.564	1
FBgn0261597	CG10305	RpS26	0.469635	0.294828	0.772	0.802	1
FBgn0263873	CG43720	sick	0.471364	0.0346449	0.137	0.114	1
FBgn0010473	CG15427	tutl	0.474967	0.654144	0.69	0.584	1
FBgn0085447	CG34418	sif	0.47765	1.44802	0.734	0.475	1
FBgn0022382	CG15862	Pka-R2	0.505205	0.251254	0.47	0.371	1
FBgn0261089	CG5559	Sytalpha	0.505997	0.0372059	0.177	0.147	1
FBgn0261574	CG7749	kug	0.508093	0.0577881	0.193	0.163	1
FBgn0026411	CG11354	Lim1	0.519842	0.391946	0.308	0.269	1
FBgn0000064	CG6058	Ald1	0.525168	0.772849	0.72	0.569	1
FBgn0050158	CG30158	CG30158	0.527392	0.00424267	0.118	0.117	1
FBgn0004242	CG3139	Syt1	0.527413	1.03854	0.859	0.844	1
FBgn0266377	CG45019	Pde8	0.53182	0.039634	0.202	0.179	1
FBgn0013433	CG4846	beat-Ia	0.543042	0.0434461	0.214	0.196	1
FBgn0265597	CG44424	rad	0.572363	0.926921	0.742	0.627	1
FBgn0085414	CG34385	dpr12	0.598829	0.158304	0.47	0.422	1
FBgn0011828	CG12002	Pxn	0.599414	0.0406837	0.146	0.12	1
FBgn0051221	CG31221	CG31221	0.605402	11.8702	0.978	0.969	1
FBgn0085395	CG34366	Shawl	0.627892	0.0485479	0.18	0.156	1
FBgn0263289	CG43398	scrib	0.64291	0.039668	0.188	0.152	1
FBgn0265052	CG44167	St3	0.661693	0.0204454	0.253	0.227	1
FBgn0263397	CG8585	Ih	0.663061	1.93183	0.872	0.764	1
FBgn0024963	CG7535	GluClalpha	0.667053	0.758305	0.706	0.603	1
FBgn0266137	CG18741	Dop1R2	0.676346	0.0297813	0.124	0.101	1
FBgn0004580	CG6702	Cbp53E	0.696998	2.77152	0.753	0.575	1
FBgn0261552	CG42670	ps	0.723264	1.3979	0.915	0.887	1
FBgn0041094	CG7590	scyl	0.729565	0.330437	0.51	0.393	1
FBgn0039054	CG13830	Cow	0.736107	0.258914	0.535	0.462	1
FBgn0036165	CG7533	chrb	0.752968	0.76301	0.732	0.649	1
FBgn0035171	CG12502	CG12502	0.752976	0.015022	0.164	0.148	1
FBgn0013686	CR34094	mt:lrRNA	0.761671	-0.0997245	0.936	0.942	1
FBgn0034138	CG8332	RpS15	0.799171	0.880118	0.904	0.873	1
FBgn0037956	CG6959	CG6959	0.813145	0.00993826	0.114	0.105	1
FBgn0000036	CG5610	nAChRalpha1	0.81382	0.210349	0.464	0.393	1
FBgn0033250	CG14762	CG14762	0.817211	0.413114	0.705	0.659	1
FBgn0035816	CG13685	CG13685	0.846566	0.037913	0.202	0.178	1
FBgn0051997	CG31997	CG31997	0.851598	0.018193	0.118	0.113	1
FBgn0037525	CG17816	CG17816	0.859416	0.357445	0.557	0.459	1
FBgn0013576	CG32464	mtd	0.860982	0.719463	0.772	0.688	1
FBgn0001233	CG1242	Hsp83	0.877619	0.23333	0.66	0.621	1
FBgn0003360	CG16944	sesB	0.907019	1.00558	0.849	0.813	1
FBgn0029814	CG15765	CG15765	0.918485	0.484275	0.563	0.457	1
FBgn0032833	CG10664	COX4	0.922282	0.44801	0.793	0.758	1
FBgn0050089	CG30089	CG30089	0.929271	0.0148437	0.138	0.122	1
FBgn0038237	CG8279	Pde6	0.952753	0.517147	0.635	0.529	1
FBgn0263220	CG43388	Hk	0.957935	0.719122	0.749	0.637	1
FBgn0052062	CG32062	Rbfox1	0.967158	1.69558	0.884	0.804	1
FBgn0035499	CG14996	Chd64	0.968462	0.0117734	0.176	0.159	1
FBgn0038282	CG33485	dpr9	0.985746	0.781158	0.637	0.512	1

## Sheet: Male_C3
FlyBaseID	GeneID	Gene symbol	p_val	avg_diff	pct.1	pct.2	p_val_adj
FBgn0019660	CR32665	lncRNA:roX2	0	-2.89128	0.008	0.861	0
FBgn0004047	CG11129	Yp3	4.19336e-87	0.17259	0.137	0.001	6.29004e-84
FBgn0051690	CG31690	CG31690	3.78276e-47	0.240377	0.306	0.143	5.67415e-44
FBgn0058469	CR40469	lncRNA:CR40469	4.32497e-39	0.0719306	0.139	0.072	6.48745e-36
FBgn0004652	CG14307	fru	2.36983e-37	0.400076	0.393	0.177	3.55474e-34
FBgn0002940	CG4550	ninaE	4.04554e-36	-0.507175	0.118	0.304	6.06831e-33
FBgn0260429	CG42524	CG42524	3.83478e-29	0.167325	0.197	0.075	5.75216e-26
FBgn0002945	CG11614	nkd	7.03485e-28	0.25927	0.287	0.137	1.05523e-24
FBgn0036821	CG3961	CG3961	1.28256e-27	0.11787	0.164	0.069	1.92384e-24
FBgn0052057	CG32057	dpr10	1.89897e-27	0.172811	0.255	0.132	2.84846e-24
FBgn0011693	CG4899	Pdh	1.62928e-26	-0.17951	0.025	0.12	2.44391e-23
FBgn0052982	CG32982	CG32982	2.05192e-25	0.23295	0.236	0.104	3.07788e-22
FBgn0037015	CG13253	cmpy	1.89478e-22	0.122605	0.228	0.131	2.84216e-19
FBgn0283499	CG18402	InR	7.35947e-22	0.0729466	0.19	0.125	1.10392e-18
FBgn0024321	CG8524	NK7.1	1.46271e-21	0.055817	0.16	0.096	2.19406e-18
FBgn0004619	CG8442	GluRIA	4.0761e-21	0.343944	0.342	0.198	6.11415e-18
FBgn0087002	CG11064	apolpp	4.22708e-21	0.0613988	0.128	0.072	6.34062e-18
FBgn0029768	CG16752	SPR	1.11179e-20	0.275862	0.281	0.163	1.66768e-17
FBgn0285926	CG1691	Imp	6.15274e-20	0.264436	0.144	0.036	9.22911e-17
FBgn0036789	CG13702	AstC-R2	1.24649e-19	0.211417	0.212	0.103	1.86974e-16
FBgn0267322	CR45758	lncRNA:CR45758	6.26301e-19	0.0861657	0.145	0.073	9.39451e-16
FBgn0052066	CG32066	CG32066	1.33598e-18	0.0730147	0.176	0.113	2.00397e-15
FBgn0083228	CG5907	Frq2	1.36491e-18	0.193369	0.233	0.119	2.04736e-15
FBgn0013995	CG5685	Calx	3.22081e-18	0.157346	0.198	0.093	4.83121e-15
FBgn0285963	CG46339	CG46339	5.38114e-18	0.0808088	0.135	0.062	8.07172e-15
FBgn0020269	CG10145	mspo	5.59595e-18	0.203368	0.251	0.126	8.39392e-15
FBgn0263773	CG43690	fok	7.40376e-18	0.145393	0.297	0.189	1.11056e-14
FBgn0087012	CG1056	5-HT2A	1.20182e-17	0.176186	0.248	0.148	1.80273e-14
FBgn0052683	CG32683	CG32683	1.50194e-17	0.0840538	0.103	0.035	2.25291e-14
FBgn0031299	CG4629	CG4629	1.58792e-17	0.0666671	0.152	0.089	2.38187e-14
FBgn0264753	CG44011	Rgk1	3.26384e-17	0.110984	0.181	0.093	4.89576e-14
FBgn0052626	CG32626	AMPdeam	5.77811e-17	0.0549196	0.164	0.117	8.66716e-14
FBgn0267910	CR34335	lncRNA:CR34335	6.5317e-17	13.615	0.996	0.967	9.79755e-14
FBgn0010452	CG11280	trn	8.56498e-17	0.162228	0.198	0.099	1.28475e-13
FBgn0086604	CG12484	side-VIII	1.308e-16	0.0827941	0.208	0.149	1.962e-13
FBgn0032666	CG5758	CG5758	4.34457e-16	0.211756	0.261	0.13	6.51686e-13
FBgn0261588	CG42698	pdm3	5.0807e-16	0.125397	0.115	0.037	7.62104e-13
FBgn0000659	CG10002	fkh	5.69839e-16	0.158003	0.171	0.088	8.54758e-13
FBgn0259677	CG42346	CG42346	6.64685e-16	0.0918468	0.12	0.042	9.97028e-13
FBgn0261509	CG14351	haf	9.29762e-16	0.110291	0.11	0.044	1.39464e-12
FBgn0261698	CG42732	SLO2	4.84203e-15	0.195642	0.283	0.158	7.26305e-12
FBgn0250867	CG42238	CG42238	8.01841e-15	0.145947	0.27	0.173	1.20276e-11
FBgn0000547	CG12676	ed	1.01683e-14	0.180181	0.282	0.174	1.52524e-11
FBgn0031738	CG9171	CG9171	1.06103e-14	0.0783727	0.139	0.07	1.59155e-11
FBgn0051324	CG31324	CG31324	1.30525e-14	0.214428	0.393	0.279	1.95788e-11
FBgn0264090	CG43759	CG43759	1.95323e-14	0.100958	0.158	0.095	2.92984e-11
FBgn0045038	CG7105	Proc	2.73694e-14	0.107323	0.128	0.06	4.10541e-11
FBgn0262782	CG5362	Mdh1	7.72112e-14	0.045728	0.196	0.146	1.15817e-10
FBgn0261260	CG42611	mgl	8.23335e-14	0.0673503	0.139	0.084	1.235e-10
FBgn0260971	CG42594	CG42594	9.2749e-14	0.279676	0.283	0.164	1.39124e-10
FBgn0261988	CG17998	Gprk2	9.47183e-14	0.307508	0.384	0.218	1.42077e-10
FBgn0003301	CG9533	rut	1.07486e-13	0.0813235	0.226	0.148	1.61229e-10
FBgn0036801	CG6896	MYPT-75D	1.41423e-13	0.0927623	0.228	0.158	2.12135e-10
FBgn0029663	CG10804	CG10804	1.53775e-13	0.515955	0.555	0.39	2.30663e-10
FBgn0019662	CG8593	qm	2.61998e-13	0.0688843	0.127	0.072	3.92998e-10
FBgn0019650	CG11186	toy	2.88839e-13	0.146955	0.164	0.075	4.33258e-10
FBgn0000097	CG3166	aop	5.34548e-13	0.153276	0.251	0.156	8.01822e-10
FBgn0029824	CG3726	CG3726	5.76012e-13	0.11503	0.264	0.189	8.64018e-10
FBgn0051814	CG31814	DIP-kappa	7.61438e-13	0.179672	0.141	0.063	1.14216e-09
FBgn0003499	CG7847	sr	1.06391e-12	0.0729777	0.156	0.091	1.59587e-09
FBgn0000179	CG3578	bi	2.28446e-12	0.259004	0.218	0.11	3.42669e-09
FBgn0004395	CG4620	unk	2.29385e-12	0.0937842	0.25	0.179	3.44077e-09
FBgn0051163	CG31163	SKIP	3.64113e-12	0.200833	0.388	0.281	5.46169e-09
FBgn0033987	CG12424	ckn	4.34659e-12	0.129835	0.192	0.104	6.51989e-09
FBgn0031530	CG3254	Pgant2	4.36595e-12	0.0741059	0.125	0.064	6.54892e-09
FBgn0032151	CG4128	nAChRalpha6	8.52966e-12	1.48013	0.611	0.408	1.27945e-08
FBgn0024841	CG1963	Pcd	1.28434e-11	0.0713048	0.127	0.068	1.92652e-08
FBgn0015766	CG10596	Msr-110	1.38541e-11	0.0509926	0.118	0.075	2.07812e-08
FBgn0004168	CG16720	5-HT1A	1.54241e-11	0.235433	0.204	0.103	2.31361e-08
FBgn0013718	CG33991	nuf	2.26172e-11	0.0477117	0.11	0.064	3.39258e-08
FBgn0066101	CG31094	LpR1	3.34161e-11	0.0652003	0.183	0.125	5.01241e-08
FBgn0030272	CG15201	CG15201	3.93882e-11	0.145285	0.2	0.122	5.90823e-08
FBgn0052521	CG32521	CG32521	4.56854e-11	0.0996494	0.154	0.088	6.85282e-08
FBgn0033159	CG17800	Dscam1	5.99688e-11	0.0403255	0.107	0.066	8.99532e-08
FBgn0283651	CG46301	CG46301	7.18097e-11	0.0875166	0.136	0.077	1.07715e-07
FBgn0004198	CG11387	ct	7.61996e-11	1.67354	0.658	0.512	1.14299e-07
FBgn0040765	CG33473	luna	7.88384e-11	0.315524	0.397	0.26	1.18258e-07
FBgn0035756	CG32381	unc-13-4A	1.66936e-10	0.0914029	0.128	0.06	2.50405e-07
FBgn0262160	CG9932	CG9932	1.72408e-10	0.215597	0.364	0.244	2.58612e-07
FBgn0263219	CG42330	Dscam4	2.60496e-10	0.0968031	0.286	0.216	3.90744e-07
FBgn0015777	CG9261	nrv2	2.8254e-10	0.0658475	0.166	0.106	4.2381e-07
FBgn0050361	CG30361	mtt	3.93099e-10	0.0790667	0.118	0.055	5.89648e-07
FBgn0264000	CG43743	GluRIB	3.9897e-10	0.310357	0.435	0.299	5.98455e-07
FBgn0030174	CG15312	CG15312	4.13358e-10	0.110388	0.214	0.133	6.20036e-07
FBgn0261999	CG42817	Ca-Ma2d	4.80715e-10	0.0677942	0.114	0.066	7.21073e-07
FBgn0034286	CG33996	dpr13	4.84078e-10	0.299797	0.381	0.243	7.26116e-07
FBgn0262614	CG43140	pyd	5.22398e-10	0.128741	0.144	0.071	7.83597e-07
FBgn0261556	CG42674	CG42674	6.3252e-10	0.00825058	0.244	0.206	9.4878e-07
FBgn0035495	CG14989	CG14989	6.55575e-10	0.933869	0.484	0.429	9.83362e-07
FBgn0283451	CG11491	br	6.87963e-10	0.0924463	0.103	0.047	1.03194e-06
FBgn0011582	CG9652	Dop1R1	8.69122e-10	0.0767814	0.148	0.085	1.30368e-06
FBgn0262473	CG5490	Tl	9.34291e-10	0.0621598	0.152	0.107	1.40144e-06
FBgn0065099	CR33925	snRNA:7SK	1.03464e-09	1.13049	0.938	0.882	1.55196e-06
FBgn0264975	CG1634	Nrg	1.08731e-09	0.0752104	0.184	0.128	1.63097e-06
FBgn0038980	CG6919	Octbeta1R	1.30786e-09	0.142646	0.202	0.118	1.96179e-06
FBgn0004607	CG1449	zfh2	1.48884e-09	0.130472	0.156	0.084	2.23326e-06
FBgn0031016	CG12199	kek5	2.011e-09	0.0613306	0.153	0.099	3.0165e-06
FBgn0031971	CG7224	Sirup	2.54447e-09	0.0744912	0.15	0.098	3.81671e-06
FBgn0085409	CG34380	smal	4.24307e-09	0.038331	0.192	0.145	6.3646e-06
FBgn0042696	CG2380	NfI	4.37395e-09	0.0690221	0.282	0.209	6.56093e-06
FBgn0033544	CG7220	CG7220	5.93393e-09	0.0302509	0.2	0.164	8.9009e-06
FBgn0004885	CG6863	tok	6.05217e-09	0.0643829	0.114	0.061	9.07825e-06
FBgn0033368	CG13743	CG13743	6.4415e-09	0.0635429	0.119	0.07	9.66225e-06
FBgn0259243	CG42341	Pka-R1	7.70228e-09	0.0445423	0.236	0.186	1.15534e-05
FBgn0033403	CG13739	CG13739	7.71077e-09	0.334222	0.402	0.273	1.15662e-05
FBgn0264273	CG33960	Sema2b	9.04616e-09	0.0939995	0.171	0.105	1.35692e-05
FBgn0030158	CG9686	CG9686	9.0513e-09	0.0586133	0.117	0.073	1.3577e-05
FBgn0033268	CG2297	Obp44a	9.61305e-09	0.47502	0.304	0.19	1.44196e-05
FBgn0023534	CG17778	CG17778	9.89221e-09	0.000377182	0.184	0.166	1.48383e-05
FBgn0261046	CG31190	Dscam3	1.0061e-08	0.0842502	0.19	0.123	1.50915e-05
FBgn0261649	CG31247	tinc	1.02299e-08	0.0169921	0.141	0.114	1.53449e-05
FBgn0033405	CG13954	CG13954	1.02324e-08	0.146874	0.286	0.207	1.53486e-05
FBgn0028369	CG3653	kirre	1.12586e-08	0.086099	0.291	0.227	1.68879e-05
FBgn0013733	CG18076	shot	1.77555e-08	0.0980762	0.295	0.22	2.66333e-05
FBgn0051361	CG31361	dpr17	1.79766e-08	0.101599	0.18	0.117	2.69648e-05
FBgn0265595	CG44422	CG44422	1.90801e-08	0.210511	0.36	0.256	2.86202e-05
FBgn0053639	CG33639	CG33639	1.91534e-08	0.0413426	0.113	0.071	2.87302e-05
FBgn0005771	CG4491	noc	2.25745e-08	0.0206235	0.106	0.076	3.38617e-05
FBgn0259212	CG42312	cno	2.64286e-08	0.0498295	0.102	0.055	3.96429e-05
FBgn0040532	CG8369	CG8369	2.74639e-08	0.112646	0.209	0.145	4.11959e-05
FBgn0000567	CG32180	Eip74EF	3.22977e-08	0.0337004	0.132	0.094	4.84465e-05
FBgn0086680	CG10037	vvl	3.55518e-08	0.143158	0.144	0.082	5.33277e-05
FBgn0050463	CG30463	Pgant9	3.58691e-08	0.1341	0.275	0.192	5.38036e-05
FBgn0031770	CG13995	CG13995	3.76838e-08	0.0828215	0.164	0.106	5.65257e-05
FBgn0085412	CG34383	kmr	4.08444e-08	0.158762	0.317	0.225	6.12667e-05
FBgn0004858	CG4220	elB	4.3487e-08	0.0312487	0.128	0.092	6.52305e-05
FBgn0052206	CG32206	CG32206	4.97329e-08	0.0560289	0.246	0.184	7.45993e-05
FBgn0261285	CG5629	Ppcs	6.26563e-08	0.0819971	0.171	0.112	9.39845e-05
FBgn0038542	CG7431	TyrR	8.06816e-08	0.0684774	0.109	0.066	0.000121022
FBgn0053143	CG33143	CG33143	8.2276e-08	0.00874447	0.172	0.141	0.000123414
FBgn0031306	CG4577	CG4577	8.7171e-08	0.0989688	0.232	0.158	0.000130757
FBgn0011661	CG10701	Moe	8.96436e-08	0.034587	0.126	0.094	0.000134465
FBgn0000303	CG12345	ChAT	9.77667e-08	0.101721	0.133	0.069	0.00014665
FBgn0262593	CG43128	Shab	9.77916e-08	0.225243	0.311	0.195	0.000146687
FBgn0085420	CG34391	DIP-delta	9.8513e-08	0.147606	0.16	0.096	0.00014777
FBgn0051092	CG31092	LpR2	1.08135e-07	0.0537314	0.108	0.062	0.000162202
FBgn0051619	CG31619	nolo	1.23611e-07	0.0798948	0.169	0.108	0.000185416
FBgn0037676	CG8861	CG8861	1.24279e-07	-0.0551712	0.327	0.314	0.000186419
FBgn0031736	CG11030	CG11030	1.33207e-07	0.0777254	0.15	0.091	0.00019981
FBgn0039349	CG4685	Ssadh	1.55347e-07	0.0402418	0.124	0.082	0.00023302
FBgn0261258	CG6014	rgn	1.75185e-07	0.0645707	0.104	0.056	0.000262778
FBgn0039209	CG13624	REPTOR	1.78054e-07	0.0506339	0.279	0.237	0.000267081
FBgn0008636	CG33152	hbn	1.85194e-07	0.078977	0.125	0.09	0.000277791
FBgn0010313	CG2530	corto	1.89189e-07	0.110463	0.34	0.266	0.000283784
FBgn0286778	CG46385	CG46385	2.2164e-07	0.0568356	0.288	0.216	0.000332459
FBgn0052183	CG32183	Ccn	2.45259e-07	0.0679139	0.121	0.075	0.000367889
FBgn0259213	CG42313	side-II	2.75891e-07	0.0725664	0.334	0.258	0.000413837
FBgn0264908	CG44099	pHCl-1	2.88507e-07	0.0630131	0.246	0.182	0.000432761
FBgn0261113	CG17836	Xrp1	2.88827e-07	0.0203352	0.171	0.138	0.000433241
FBgn0029123	CG18024	SoxN	2.93619e-07	0.727701	0.459	0.315	0.000440429
FBgn0032629	CG15138	beat-IIIc	3.21214e-07	0.149437	0.208	0.129	0.000481821
FBgn0040726	CG13439	dpr1	3.34937e-07	0.130365	0.287	0.209	0.000502405
FBgn0019985	CG11144	mGluR	3.50129e-07	0.105735	0.209	0.143	0.000525193
FBgn0052204	CG32204	CG32204	3.56764e-07	0.0706264	0.131	0.078	0.000535145
FBgn0004595	CG17228	pros	3.78885e-07	3.83813	0.85	0.822	0.000568327
FBgn0035041	CG13594	CG13594	3.81339e-07	0.0377745	0.115	0.078	0.000572009
FBgn0036725	CG18265	CG18265	4.47559e-07	0.0780126	0.14	0.083	0.000671338
FBgn0031374	CG7337	Wdr62	4.5581e-07	0.41875	0.516	0.357	0.000683716
FBgn0003651	CG11502	svp	5.27414e-07	0.0265176	0.102	0.076	0.000791121
FBgn0085384	CG34355	CG34355	5.62948e-07	-0.054794	0.445	0.467	0.000844422
FBgn0260941	CG42318	app	5.87546e-07	0.203982	0.275	0.189	0.00088132
FBgn0085447	CG34418	sif	6.97865e-07	1.57262	0.769	0.62	0.0010468
FBgn0000121	CG5962	Arr2	7.73521e-07	-0.160671	0.127	0.193	0.00116028
FBgn0260462	CG12163	CG12163	9.95075e-07	0.0415148	0.111	0.068	0.00149261
FBgn0053543	CG33543	CG33543	1.03462e-06	0.317054	0.343	0.19	0.00155192
FBgn0028644	CG4838	beat-Ic	1.03486e-06	0.567785	0.371	0.223	0.00155229
FBgn0263930	CG4974	dally	1.08972e-06	0.165444	0.287	0.199	0.00163458
FBgn0051221	CG31221	CG31221	1.14995e-06	1.4802	0.623	0.583	0.00172492
FBgn0024944	CG3856	Oamb	1.17724e-06	0.0665163	0.111	0.059	0.00176586
FBgn0284243	CG9277	betaTub56D	1.18477e-06	0.218606	0.393	0.265	0.00177716
FBgn0250869	CG42240	CG42240	1.40093e-06	0.0553276	0.105	0.06	0.00210139
FBgn0015229	CG6575	glec	1.53179e-06	0.506893	0.522	0.388	0.00229768
FBgn0265182	CG44247	CG44247	1.95362e-06	0.0402251	0.168	0.127	0.00293043
FBgn0015519	CG2302	nAChRalpha3	2.03284e-06	0.0729706	0.258	0.198	0.00304925
FBgn0028645	CG7644	beat-Ib	2.19662e-06	0.102938	0.247	0.182	0.00329494
FBgn0267579	CR45919	lncRNA:CR45919	2.39655e-06	0.0543309	0.127	0.078	0.00359483
FBgn0264339	CG43795	CG43795	2.8503e-06	0.0766906	0.196	0.142	0.00427546
FBgn0261928	CG42795	CG42795	2.95766e-06	0.157722	0.37	0.279	0.00443648
FBgn0004514	CG7485	Oct-TyrR	3.03423e-06	0.0355418	0.12	0.079	0.00455134
FBgn0031414	CG33955	eys	3.34954e-06	0.26504	0.422	0.314	0.00502432
FBgn0027598	CG31012	cindr	3.38768e-06	0.590021	0.562	0.354	0.00508152
FBgn0085382	CG34353	CG34353	3.81557e-06	0.00853513	0.196	0.164	0.00572336
FBgn0260442	CG6831	rhea	4.24502e-06	0.0217554	0.111	0.081	0.00636753
FBgn0266851	CR45312	lncRNA:CR45312	4.31484e-06	0.128887	0.312	0.235	0.00647226
FBgn0039420	CG6154	CG6154	4.80931e-06	0.0722633	0.161	0.111	0.00721397
FBgn0031897	CG13784	CG13784	5.19777e-06	0.0517191	0.286	0.232	0.00779666
FBgn0011818	CG9884	oaf	5.39167e-06	0.0674437	0.162	0.113	0.00808751
FBgn0011666	CG5099	msi	5.56253e-06	0.897262	0.733	0.565	0.0083438
FBgn0001085	CG17697	fz	5.67718e-06	0.015463	0.177	0.143	0.00851577
FBgn0263994	CG43737	CG43737	6.73732e-06	0.247727	0.416	0.288	0.010106
FBgn0264442	CG43860	ab	6.95274e-06	0.097978	0.203	0.15	0.0104291
FBgn0002023	CG10699	Lim3	7.54098e-06	0.0566258	0.117	0.075	0.0113115
FBgn0052406	CG32406	PVRAP	7.70345e-06	0.0442778	0.164	0.124	0.0115552
FBgn0260753	CG13758	Pdfr	8.10557e-06	0.0603817	0.123	0.082	0.0121583
FBgn0000636	CG5803	Fas3	9.86167e-06	0.056724	0.157	0.116	0.0147925
FBgn0243512	CG7850	puc	1.01306e-05	0.00788414	0.147	0.131	0.0151959
FBgn0033446	CG1648	CG1648	1.0928e-05	0.0157357	0.108	0.09	0.016392
FBgn0085370	CG34341	Pde11	1.10703e-05	0.0287814	0.11	0.083	0.0166055
FBgn0250910	CG42244	Octbeta3R	1.15437e-05	0.0384518	0.155	0.117	0.0173156
FBgn0085399	CG34370	CG34370	1.24169e-05	0.0162814	0.197	0.169	0.0186253
FBgn0284245	CG8280	eEF1alpha1	1.39425e-05	0.0816959	0.329	0.27	0.0209137
FBgn0038498	CG14334	beat-IIa	1.48839e-05	0.166409	0.29	0.205	0.0223259
FBgn0034753	CG2852	CG2852	1.62371e-05	0.182833	0.409	0.305	0.0243556
FBgn0265598	CG44425	Bx	1.7039e-05	0.0918097	0.112	0.062	0.0255585
FBgn0030505	CG11172	NFAT	1.82629e-05	0.0946697	0.291	0.228	0.0273943
FBgn0259244	CG42342	CG42342	1.84098e-05	0.195686	0.346	0.246	0.0276148
FBgn0036381	CG8745	CG8745	1.89389e-05	0.0180569	0.105	0.089	0.0284083
FBgn0259242	CG42340	CG42340	1.92842e-05	-0.0268437	0.255	0.239	0.0289262
FBgn0260793	CG42573	2mit	2.13515e-05	0.0425464	0.164	0.121	0.0320273
FBgn0023179	CG6438	amon	2.1642e-05	0.125503	0.302	0.224	0.0324631
FBgn0040397	CG3655	CG3655	2.1665e-05	0.0641424	0.138	0.087	0.0324976
FBgn0033192	CG2105	Corin	2.1901e-05	0.267528	0.425	0.319	0.0328516
FBgn0262509	CG43079	nrm	2.50339e-05	0.0785858	0.167	0.11	0.0375508
FBgn0000422	CG10697	Ddc	2.56602e-05	0.128035	0.196	0.12	0.0384903
FBgn0259170	CG42275	alpha-Man-Ia	2.58701e-05	0.00782078	0.196	0.17	0.0388052
FBgn0000635	CG3665	Fas2	2.7487e-05	0.211953	0.26	0.141	0.0412305
FBgn0003896	CG10619	tup	2.79845e-05	-0.0794361	0.109	0.141	0.0419767
FBgn0259111	CG42253	Ndae1	3.19201e-05	-0.0067626	0.128	0.12	0.0478801
FBgn0264503	CG43902	CG43902	3.98831e-05	0.1406	0.248	0.176	0.0598247
FBgn0016797	CG9739	fz2	4.61935e-05	0.112376	0.204	0.137	0.0692902
FBgn0004449	CG5723	Ten-m	4.81214e-05	0.142069	0.318	0.247	0.0721821
FBgn0052506	CG32506	CG32506	5.1143e-05	0.0404489	0.193	0.147	0.0767146
FBgn0285952	CG3186	eEF5	5.15161e-05	0.0447505	0.275	0.232	0.0772741
FBgn0030913	CG6123	CG6123	5.16968e-05	0.0969991	0.158	0.099	0.0775451
FBgn0028481	CG4341	CG4341	5.26679e-05	0.000615422	0.253	0.221	0.0790019
FBgn0036935	CG14186	CG14186	5.35897e-05	-0.00513049	0.158	0.137	0.0803845
FBgn0053517	CG33517	Dop2R	5.90424e-05	1.27725	0.74	0.736	0.0885636
FBgn0085407	CG34378	Pvf3	6.3187e-05	0.60704	0.579	0.438	0.0947804
FBgn0051760	CG31760	CG31760	6.76048e-05	0.0388383	0.121	0.089	0.101407
FBgn0037913	CG6783	fabp	6.90538e-05	0.00993382	0.156	0.119	0.103581
FBgn0036043	CG8177	CG8177	7.11093e-05	0.0627786	0.242	0.193	0.106664
FBgn0004509	CG10772	Fur1	7.19856e-05	0.00400747	0.193	0.17	0.107978
FBgn0015774	CG10521	NetB	7.3127e-05	0.139124	0.211	0.148	0.10969
FBgn0027608	CG2082	CG2082	7.38299e-05	0.144814	0.418	0.351	0.110745
FBgn0261574	CG7749	kug	7.86052e-05	0.0175293	0.137	0.108	0.117908
FBgn0036844	CG14080	Mkp3	7.91155e-05	0.249045	0.461	0.346	0.118673
FBgn0027356	CG8604	Amph	8.44808e-05	0.0204656	0.18	0.149	0.126721
FBgn0083950	CG34114	side-VI	8.62563e-05	0.382968	0.449	0.316	0.129384
FBgn0010113	CG15532	hdc	8.79061e-05	0.595432	0.476	0.273	0.131859
FBgn0036927	CG7433	Gabat	8.86524e-05	0.038294	0.222	0.176	0.132979
FBgn0037521	CG2993	CG2993	8.93306e-05	0.0948313	0.305	0.236	0.133996
FBgn0032901	CG9339	sky	9.39004e-05	0.0824428	0.456	0.4	0.140851
FBgn0030574	CG9413	sbm	9.46325e-05	0.0457339	0.152	0.111	0.141949
FBgn0011656	CG1429	Mef2	9.8912e-05	0.0956879	0.249	0.186	0.148368
FBgn0010300	CG10719	brat	0.000115953	0.0711399	0.242	0.192	0.17393
FBgn0261244	CG33174	inaE	0.000123728	0.330929	0.477	0.362	0.185593
FBgn0038246	CG14853	CG14853	0.000143799	0.0426242	0.187	0.143	0.215698
FBgn0034725	CG6044	CG6044	0.00014583	-0.0568152	0.381	0.363	0.218745
FBgn0270928	CG32848	VAChT	0.000172681	0.193718	0.206	0.103	0.259021
FBgn0038494	CG4135	beat-IIb	0.000179434	0.0313013	0.101	0.068	0.26915
FBgn0262018	CG42829	CadN2	0.000229745	0.044639	0.122	0.083	0.344618
FBgn0027589	CG1688	CG1688	0.000259885	0.0303024	0.205	0.179	0.389828
FBgn0263706	CG43658	CG43658	0.000278788	0.024681	0.135	0.11	0.418182
FBgn0085400	CG34371	side-V	0.000290378	-0.0104203	0.16	0.145	0.435567
FBgn0000037	CG4356	mAChR-A	0.000299286	0.130144	0.345	0.263	0.448928
FBgn0001091	CG12055	Gapdh1	0.000306391	0.151535	0.392	0.311	0.459587
FBgn0265597	CG44424	rad	0.000365214	0.299229	0.292	0.211	0.547821
FBgn0038665	CG12269	euc	0.000418126	0.0337841	0.103	0.078	0.627189
FBgn0001235	CG17117	hth	0.000456382	0.336383	0.37	0.284	0.684573
FBgn0262737	CG7437	mub	0.000462985	0.463678	0.719	0.748	0.694478
FBgn0267253	CG32700	CG32700	0.000469232	0.107748	0.381	0.325	0.703847
FBgn0000633	CG17716	CG17716	0.000471184	0.494443	0.472	0.349	0.706776
FBgn0003091	CG6622	Pkc53E	0.000479466	0.504616	0.473	0.301	0.719199
FBgn0053516	CG33516	dpr3	0.000479881	-0.0317641	0.094	0.11	0.719822
FBgn0014859	CG1864	Hr38	0.000482912	-0.0219988	0.231	0.217	0.724368
FBgn0036144	CG6207	GlcAT-P	0.000500604	0.0529789	0.165	0.123	0.750905
FBgn0083949	CG34113	side-III	0.000502	0.362907	0.425	0.295	0.752999
FBgn0014184	CG16747	Oda	0.000507736	0.096413	0.607	0.596	0.761603
FBgn0250908	CG42242	beat-VII	0.000554817	0.0814743	0.208	0.153	0.832226
FBgn0024189	CG33141	sns	0.000564392	0.045004	0.136	0.094	0.846588
FBgn0261089	CG5559	Sytalpha	0.000597703	0.0571786	0.128	0.085	0.896554
FBgn0052677	CG32677	X11Lbeta	0.000618237	0.0758484	0.31	0.265	0.927355
FBgn0052600	CG32600	dpr8	0.000644495	0.0676931	0.366	0.32	0.966742
FBgn0265052	CG44167	St3	0.000655938	0.0289263	0.184	0.148	0.983906
FBgn0039584	CG14064	beat-VI	0.000662449	0.0581779	0.216	0.174	0.993674
FBgn0038237	CG8279	Pde6	0.000680815	0.290468	0.463	0.339	1
FBgn0001297	CG33956	kay	0.000763485	0.0038374	0.104	0.09	1
FBgn0265002	CG44153	CG44153	0.000796302	-0.0130969	0.202	0.184	1
FBgn0028370	CG4192	kek3	0.000881545	0.0342258	0.172	0.143	1
FBgn0044328	CG32052	CG32052	0.000961015	0.0548203	0.158	0.116	1
FBgn0266100	CG44837	CG44837	0.00101393	0.0139983	0.123	0.104	1
FBgn0264308	CG43778	CG43778	0.00103152	0.0260189	0.254	0.224	1
FBgn0287186	CG17594	scro	0.00107813	-0.0116741	0.223	0.209	1
FBgn0053202	CG33202	dpr11	0.00112814	0.0243127	0.256	0.228	1
FBgn0261871	CG33507	dpr2	0.00114132	0.0393803	0.144	0.113	1
FBgn0002643	CG8118	mam	0.00114819	0.0442418	0.156	0.116	1
FBgn0037171	CG14459	CG14459	0.00114972	0.0583836	0.114	0.083	1
FBgn0260003	CG34157	Dys	0.00126129	0.00577704	0.139	0.13	1
FBgn0037941	CG12594	CG12594	0.0013143	0.0959187	0.141	0.1	1
FBgn0033438	CG1794	Mmp2	0.00132832	-0.0353354	0.231	0.22	1
FBgn0039617	CG14521	DIP-gamma	0.00134875	0.0150621	0.124	0.094	1
FBgn0085413	CG34384	CG34384	0.00146777	0.0307333	0.279	0.254	1
FBgn0040823	CG14162	dpr6	0.00147788	0.0650161	0.237	0.193	1
FBgn0015400	CG4977	kek2	0.00153584	0.101776	0.396	0.33	1
FBgn0051665	CG31665	wry	0.00159283	0.243874	0.443	0.367	1
FBgn0260660	CG42543	Mp	0.00171188	0.0926801	0.349	0.292	1
FBgn0019643	CG3318	AANAT1	0.0017356	0.0504027	0.127	0.088	1
FBgn0032400	CG6770	CG6770	0.00175005	0.478686	0.657	0.538	1
FBgn0015609	CG7100	CadN	0.00176494	0.157372	0.397	0.303	1
FBgn0259821	CG42402	CG42402	0.00180253	0.0980955	0.298	0.234	1
FBgn0052647	CG32647	CG32647	0.00188919	0.0762049	0.262	0.208	1
FBgn0030090	CG12664	fend	0.00218024	0.212525	0.337	0.231	1
FBgn0035092	CG3441	Nplp1	0.00235595	0.0666063	0.229	0.187	1
FBgn0020907	CG14904	Scp2	0.00239401	-0.0772134	0.291	0.291	1
FBgn0267668	CR46006	lncRNA:CR46006	0.00248419	-0.00839434	0.301	0.281	1
FBgn0052432	CG32432	CG32432	0.00297235	0.0482708	0.299	0.257	1
FBgn0014343	CG10601	mirr	0.00321165	0.0775054	0.124	0.095	1
FBgn0266801	CG45263	CG45263	0.00373366	0.0138842	0.417	0.364	1
FBgn0037153	CG12673	olf413	0.00400151	0.100409	0.208	0.157	1
FBgn0085380	CG34351	CG34351	0.00405386	0.00821909	0.104	0.09	1
FBgn0039380	CG5890	CG5890	0.00424322	0.0266973	0.239	0.197	1
FBgn0264815	CG44007	Pde1c	0.00459487	0.098124	0.231	0.176	1
FBgn0027654	CG2239	jdp	0.00461144	0.56073	0.543	0.4	1
FBgn0010114	CG2040	hig	0.00481951	0.471149	0.537	0.404	1
FBgn0040805	CG12355	CG12355	0.0051325	0.00706086	0.117	0.104	1
FBgn0265487	CG33197	mbl	0.00520181	0.767202	0.414	0.245	1
FBgn0004880	CG1130	scrt	0.00538567	0.469624	0.847	0.891	1
FBgn0262508	CG43078	CG43078	0.00557576	0.0539085	0.105	0.072	1
FBgn0053179	CG33179	beat-IIIb	0.0057208	0.114669	0.267	0.212	1
FBgn0259234	CG42332	Camta	0.00602709	0.0193815	0.134	0.104	1
FBgn0266871	CR45332	lncRNA:CR45332	0.00604793	0.0210926	0.121	0.091	1
FBgn0039647	CG14509	jus	0.00624291	0.167621	0.429	0.344	1
FBgn0263289	CG43398	scrib	0.00666754	0.04347	0.145	0.111	1
FBgn0052017	CG32017	CG32017	0.00684704	0.0436679	0.656	0.652	1
FBgn0036454	CG17839	CG17839	0.00706506	-0.0285332	0.247	0.236	1
FBgn0040297	CG9256	Nhe2	0.00715931	0.0108168	0.109	0.095	1
FBgn0003274	CG4918	RpLP2	0.00774753	0.0752304	0.517	0.484	1
FBgn0086677	CG30040	jeb	0.00810483	0.131585	0.359	0.279	1
FBgn0051774	CG31774	fred	0.00826799	0.0145919	0.165	0.138	1
FBgn0039816	CG11317	CG11317	0.00838254	0.0277644	0.109	0.085	1
FBgn0050089	CG30089	CG30089	0.00889406	-0.0095948	0.117	0.11	1
FBgn0038826	CG17838	Syp	0.00901383	0.173702	0.526	0.465	1
FBgn0034978	CG3257	CG3257	0.00971253	0.0310345	0.144	0.111	1
FBgn0085383	CG34354	CG34354	0.0103581	0.0324729	0.192	0.162	1
FBgn0016061	CG31062	side	0.0106757	0.124751	0.416	0.351	1
FBgn0036494	CG7250	Toll-6	0.017216	0.333102	0.381	0.273	1
FBgn0001186	CG3001	Hex-A	0.0176273	1.48821	0.735	0.511	1
FBgn0028496	CG30116	CG30116	0.0178404	0.0639101	0.402	0.417	1
FBgn0002868	CG9470	MtnA	0.0178909	0.331565	0.38	0.237	1
FBgn0285948	CG15442	RpL27A	0.018196	-0.148038	0.745	0.805	1
FBgn0027339	CG11352	jim	0.0182003	0.591341	0.965	0.979	1
FBgn0085414	CG34385	dpr12	0.018244	0.0220766	0.377	0.339	1
FBgn0086758	CG31666	chinmo	0.0186075	0.342182	0.666	0.561	1
FBgn0035170	CG12191	dpr20	0.0194535	0.0122095	0.101	0.083	1
FBgn0033196	CG1358	CG1358	0.0200304	-0.0504179	0.113	0.132	1
FBgn0267033	CG45477	mamo	0.0201484	0.843868	0.642	0.584	1
FBgn0003165	CG9755	pum	0.0203246	0.40245	0.776	0.753	1
FBgn0034138	CG8332	RpS15	0.0211616	0.290697	0.839	0.882	1
FBgn0001233	CG1242	Hsp83	0.021245	-0.00876819	0.484	0.483	1
FBgn0038156	CG14372	side-IV	0.0224247	0.033497	0.123	0.094	1
FBgn0085421	CG34392	Epac	0.0233823	0.044121	0.185	0.15	1
FBgn0261262	CG42613	CG42613	0.0235763	0.684647	0.639	0.515	1
FBgn0031424	CG9887	VGlut	0.0240087	1.99389	0.987	0.99	1
FBgn0036165	CG7533	chrb	0.0243513	0.205405	0.622	0.537	1
FBgn0264001	CG43744	bru3	0.0248012	0.429148	0.48	0.367	1
FBgn0265296	CG42256	Dscam2	0.0249191	0.719616	0.682	0.619	1
FBgn0038087	CG10134	beat-Va	0.0266354	0.00491189	0.103	0.089	1
FBgn0001078	CG4059	ftz-f1	0.0282303	0.0166182	0.429	0.419	1
FBgn0035816	CG13685	CG13685	0.0337746	-0.00714904	0.147	0.143	1
FBgn0029939	CG9650	CG9650	0.039632	0.211874	0.409	0.364	1
FBgn0022382	CG15862	Pka-R2	0.0408746	0.110115	0.312	0.244	1
FBgn0010415	CG10497	Sdc	0.0418808	0.316604	0.607	0.528	1
FBgn0013973	CG1470	Gycbeta100B	0.0431424	0.0126152	0.166	0.148	1
FBgn0260657	CG42540	CG42540	0.0438413	0.278906	0.556	0.495	1
FBgn0260943	CG32169	Rbp6	0.043943	2.2854	0.912	0.928	1
FBgn0263353	CG11000	CG11000	0.0445262	0.369874	0.516	0.362	1
FBgn0085395	CG34366	Shawl	0.0493203	0.00633466	0.156	0.144	1
FBgn0000411	CG5893	D	0.0509984	-0.0609771	0.168	0.188	1
FBgn0033250	CG14762	CG14762	0.0513252	0.0761748	0.198	0.149	1
FBgn0039064	CG4467	CG4467	0.0517018	0.220335	0.441	0.35	1
FBgn0039089	CG10152	beat-IV	0.0577918	0.0406008	0.136	0.109	1
FBgn0038282	CG33485	dpr9	0.0595763	0.398238	0.386	0.255	1
FBgn0041094	CG7590	scyl	0.0607259	0.0460785	0.517	0.468	1
FBgn0262738	CG3620	norpA	0.0621435	0.110072	0.44	0.403	1
FBgn0264490	CG18389	Eip93F	0.0625466	0.206333	0.397	0.354	1
FBgn0262869	CG43224	Gfrl	0.0631978	0.154508	0.374	0.292	1
FBgn0259171	CG42276	Pde9	0.0650591	0.157988	0.452	0.409	1
FBgn0261597	CG10305	RpS26	0.0682589	-0.304605	0.759	0.867	1
FBgn0052698	CG32698	CARPB	0.0704695	0.149399	0.154	0.133	1
FBgn0031632	CG15628	CG15628	0.0758197	0.137893	0.409	0.342	1
FBgn0010412	CG4464	RpS19a	0.0797127	-0.0556896	0.255	0.273	1
FBgn0014163	CG4609	fax	0.0798511	0.581402	0.55	0.377	1
FBgn0032797	CG10186	Hasp	0.0822497	0.654735	0.795	0.825	1
FBgn0004910	CG15855	Eip63F-1	0.0827719	0.0010593	0.22	0.211	1
FBgn0035499	CG14996	Chd64	0.0830798	-0.000628019	0.117	0.105	1
FBgn0250839	CG2016	CG2016	0.0854014	0.107389	0.172	0.126	1
FBgn0066084	CG30425	RpL41	0.0880447	2.41504	0.836	0.713	1
FBgn0000273	CG4379	Pka-C1	0.0936378	0.225086	0.559	0.51	1
FBgn0004244	CG10537	Rdl	0.100144	0.935251	0.88	0.887	1
FBgn0033108	CG15236	CG15236	0.101296	0.0914978	0.265	0.221	1
FBgn0004611	CG4574	Plc21C	0.104929	0.123961	0.401	0.33	1
FBgn0015399	CG12283	kek1	0.112333	0.215967	0.443	0.366	1
FBgn0038653	CG18208	Octalpha2R	0.11599	-0.0286895	0.347	0.342	1
FBgn0000036	CG5610	nAChRalpha1	0.117165	-0.00257543	0.35	0.338	1
FBgn0004516	CG14994	Gad1	0.125207	0.0871565	0.122	0.076	1
FBgn0013954	CG11001	Fkbp12	0.126758	0.0818826	0.345	0.301	1
FBgn0263397	CG8585	Ih	0.135333	1.35493	0.83	0.841	1
FBgn0030432	CG4404	CG4404	0.1461	0.0105763	0.131	0.115	1
FBgn0052062	CG32062	Rbfox1	0.149702	0.979112	0.783	0.749	1
FBgn0033484	CG2269	CG2269	0.163187	0.478583	0.654	0.595	1
FBgn0028875	CG32975	nAChRalpha5	0.163612	0.527884	0.673	0.571	1
FBgn0000535	CG10952	eag	0.163671	0.0152418	0.255	0.233	1
FBgn0085387	CG34358	shakB	0.169557	0.222115	0.382	0.299	1
FBgn0010411	CG8900	RpS18	0.173582	-0.27278	0.765	0.895	1
FBgn0024963	CG7535	GluClalpha	0.180374	0.573953	0.661	0.567	1
FBgn0031835	CG11319	CG11319	0.180459	0.0662955	0.337	0.298	1
FBgn0085753	CR40596	28SrRNA-Psi:CR40596	0.18154	0.00885452	0.154	0.134	1
FBgn0042630	CG32139	Sox21b	0.181833	-0.00723389	0.176	0.173	1
FBgn0031294	CG31795	IA-2	0.184482	2.48885	0.964	0.974	1
FBgn0001319	CG10197	kn	0.194823	-0.0267625	0.106	0.123	1
FBgn0005775	CG7503	Con	0.206484	0.519776	0.51	0.369	1
FBgn0037525	CG17816	CG17816	0.207942	0.113193	0.532	0.477	1
FBgn0031381	CG7291	Npc2a	0.21311	-0.00669443	0.101	0.091	1
FBgn0263257	CG43395	Cngl	0.220886	0.800853	0.804	0.739	1
FBgn0003423	CG1417	slgA	0.221396	0.192092	0.579	0.545	1
FBgn0263980	CG43729	Stacl	0.222979	0.10628	0.496	0.465	1
FBgn0035032	CG4692	ATPsynF	0.226482	0.425311	0.76	0.767	1
FBgn0029814	CG15765	CG15765	0.227978	0.238244	0.397	0.283	1
FBgn0264087	CG43756	Slob	0.228008	-0.000237869	0.168	0.15	1
FBgn0029897	CG3203	RpL17	0.234828	0.0528618	0.609	0.604	1
FBgn0032840	CG13968	sNPF	0.235697	0.0690247	0.216	0.19	1
FBgn0000116	CG32031	Argk	0.256052	0.213526	0.814	0.868	1
FBgn0261549	CG42667	rdgA	0.266953	-0.0276102	0.366	0.345	1
FBgn0085434	CG34405	NaCP60E	0.268262	0.563922	0.686	0.598	1
FBgn0267428	CG45781	DIP-lambda	0.272528	0.00154615	0.125	0.123	1
FBgn0263995	CG43738	cpo	0.274311	0.210935	0.603	0.585	1
FBgn0017590	CG6669	klg	0.277588	0.183527	0.461	0.39	1
FBgn0267252	CG3694	Ggamma30A	0.289517	1.36545	0.959	0.965	1
FBgn0000024	CG17907	Ace	0.303058	0.28903	0.477	0.408	1
FBgn0264574	CG43946	Glut1	0.306802	0.0470181	0.302	0.273	1
FBgn0260658	CG42541	CG42541	0.308485	-0.043905	0.502	0.482	1
FBgn0023095	CG11282	caps	0.317559	0.00454582	0.148	0.133	1
FBgn0004242	CG3139	Syt1	0.323708	0.322492	0.816	0.897	1
FBgn0033356	CG8229	CG8229	0.331659	-0.0400739	0.126	0.143	1
FBgn0000064	CG6058	Ald1	0.333364	0.741205	0.753	0.651	1
FBgn0000042	CG4027	Act5C	0.333936	0.250771	0.545	0.478	1
FBgn0038839	CG10830	Ktl	0.343223	-0.0148665	0.241	0.234	1
FBgn0004580	CG6702	Cbp53E	0.345799	1.2134	0.535	0.341	1
FBgn0005658	CG7018	Ets65A	0.347419	-0.0173959	0.198	0.203	1
FBgn0038063	CG33976	Octbeta2R	0.355605	0.225019	0.46	0.37	1
FBgn0285944	CG9907	para	0.365123	0.657153	0.786	0.868	1
FBgn0000575	CG1007	emc	0.381473	0.0253827	0.435	0.407	1
FBgn0013576	CG32464	mtd	0.382306	0.289471	0.639	0.576	1
FBgn0053147	CG33147	Hs3st-A	0.389233	0.229144	0.468	0.371	1
FBgn0034731	CG10384	CG10384	0.390708	0.0139254	0.117	0.1	1
FBgn0003435	CG9218	sm	0.399428	0.583122	0.795	0.83	1
FBgn0011224	CG31000	heph	0.400741	0.558977	0.518	0.406	1
FBgn0002593	CG4087	RpLP1	0.40217	0.144422	0.713	0.716	1
FBgn0083963	CG34127	Nlg3	0.42014	0.15185	0.521	0.463	1
FBgn0030723	CG14948	dpr18	0.422717	0.00968965	0.123	0.112	1
FBgn0013981	CG3379	His4r	0.448211	0.389221	0.888	0.929	1
FBgn0261804	CG42750	CG42750	0.45369	0.0685856	0.363	0.32	1
FBgn0013688	CR34096	mt:srRNA	0.455467	-0.0206231	0.15	0.169	1
FBgn0026160	CG7958	tna	0.455564	0.29247	0.559	0.477	1
FBgn0259108	CG34387	futsch	0.48036	1.01121	0.785	0.805	1
FBgn0086778	CG32538	nAChRalpha7	0.510751	0.325186	0.52	0.431	1
FBgn0030412	CG17762	Tomosyn	0.513072	0.309896	0.598	0.528	1
FBgn0085391	CG34362	trv	0.514423	0.434955	0.52	0.45	1
FBgn0264386	CG15899	Ca-alpha1T	0.530539	0.314248	0.492	0.431	1
FBgn0052264	CG32264	CG32264	0.538035	0.471263	0.683	0.625	1
FBgn0013686	CR34094	mt:lrRNA	0.589808	-1.05255	0.953	0.982	1
FBgn0267336	CG34360	Glut4EF	0.600997	0.638288	0.856	0.862	1
FBgn0261552	CG42670	ps	0.602916	0.650374	0.916	0.96	1
FBgn0004369	CG11516	Ptp99A	0.623137	0.512275	0.632	0.524	1
FBgn0003360	CG16944	sesB	0.628162	0.329182	0.779	0.885	1
FBgn0263392	CG43444	Tet	0.629103	0.0151795	0.609	0.582	1
FBgn0000108	CG7727	Appl	0.639086	0.492632	0.741	0.793	1
FBgn0263512	CG33980	Vsx2	0.639403	-0.011155	0.123	0.12	1
FBgn0010473	CG15427	tutl	0.646463	0.289296	0.594	0.525	1
FBgn0264606	CG43955	Fife	0.660317	0.0157053	0.381	0.365	1
FBgn0085432	CG34403	pan	0.678832	0.0379361	0.756	0.762	1
FBgn0083991	CG34155	CG34155	0.679328	0.0213523	0.132	0.126	1
FBgn0030897	CG5744	Frq1	0.683512	0.906463	0.753	0.628	1
FBgn0028704	CG18660	Nckx30C	0.685645	0.0153759	0.745	0.824	1
FBgn0263220	CG43388	Hk	0.702374	0.37404	0.68	0.601	1
FBgn0037874	CG4800	Tctp	0.712559	-0.0524083	0.429	0.42	1
FBgn0261836	CG42768	Msp300	0.727306	0.710969	0.687	0.649	1
FBgn0267001	CG42338	Ten-a	0.730695	1.1122	0.781	0.692	1
FBgn0261788	CG42734	Ank2	0.738318	0.436542	0.666	0.598	1
FBgn0003380	CG12348	Sh	0.753285	0.791428	0.901	0.94	1
FBgn0041707	CG1168	7B2	0.787085	0.243721	0.691	0.649	1
FBgn0039054	CG13830	Cow	0.790948	0.0531134	0.36	0.336	1
FBgn0003429	CG10693	slo	0.815493	0.270548	0.594	0.53	1
FBgn0083975	CG34139	Nlg4	0.829672	0.0104603	0.189	0.177	1
FBgn0013467	CG18285	igl	0.869979	0.195896	0.604	0.574	1
FBgn0264895	CG44086	RapGAP1	0.869986	0.325842	0.489	0.395	1
FBgn0264006	CG43749	dysc	0.884687	0.269579	0.74	0.72	1
FBgn0029761	CG10706	SK	0.894546	0.25526	0.501	0.417	1
FBgn0032833	CG10664	COX4	0.935967	0.216593	0.747	0.772	1
FBgn0001234	CR31400	lncRNA:Hsromega	0.974985	0.660688	0.964	0.978	1
FBgn0010263	CG3151	Rbp9	0.986573	0.16761	0.392	0.328	1
FBgn0041605	CG32490	cpx	0.998465	0.907938	0.99	0.996	1

## Sheet: Male_C4
FlyBaseID	GeneID	Gene symbol	p_val	avg_diff	pct.1	pct.2	p_val_adj
FBgn0019660	CR32665	lncRNA:roX2	0	-3.5318	0.012	0.923	0
FBgn0004047	CG11129	Yp3	8.09304e-75	0.182597	0.144	0.002	1.21396e-71
FBgn0002940	CG4550	ninaE	6.68234e-36	-0.500756	0.114	0.323	1.00235e-32
FBgn0004652	CG14307	fru	3.37011e-26	0.348268	0.303	0.116	5.05517e-23
FBgn0004619	CG8442	GluRIA	2.5683e-22	0.237632	0.263	0.138	3.85245e-19
FBgn0051690	CG31690	CG31690	2.64664e-20	0.166844	0.227	0.128	3.96996e-17
FBgn0013995	CG5685	Calx	2.8364e-20	0.190752	0.198	0.078	4.25461e-17
FBgn0260429	CG42524	CG42524	4.47075e-20	0.12191	0.158	0.069	6.70612e-17
FBgn0052982	CG32982	CG32982	5.38976e-20	0.182974	0.186	0.087	8.08463e-17
FBgn0087002	CG11064	apolpp	6.3112e-20	0.0958526	0.136	0.064	9.46681e-17
FBgn0029768	CG16752	SPR	1.39169e-19	0.220875	0.228	0.115	2.08753e-16
FBgn0058469	CR40469	lncRNA:CR40469	1.79474e-19	0.0560589	0.118	0.068	2.6921e-16
FBgn0026411	CG11354	Lim1	2.37529e-19	0.185989	0.105	0.022	3.56294e-16
FBgn0011693	CG4899	Pdh	7.5437e-19	-0.198342	0.028	0.116	1.13156e-15
FBgn0031424	CG9887	VGlut	7.7476e-19	0.696368	0.326	0.162	1.16214e-15
FBgn0083228	CG5907	Frq2	1.31878e-18	0.253876	0.277	0.154	1.97817e-15
FBgn0264753	CG44011	Rgk1	4.3606e-18	0.15195	0.169	0.07	6.54089e-15
FBgn0052057	CG32057	dpr10	4.2592e-17	0.180952	0.257	0.149	6.38879e-14
FBgn0002945	CG11614	nkd	9.76058e-17	0.25545	0.31	0.188	1.46409e-13
FBgn0000659	CG10002	fkh	4.38924e-16	0.18171	0.108	0.029	6.58385e-13
FBgn0052683	CG32683	CG32683	1.4863e-14	0.0789502	0.181	0.11	2.22945e-11
FBgn0035050	CG4871	SiaT	1.82322e-14	0.121433	0.111	0.038	2.73483e-11
FBgn0000121	CG5962	Arr2	2.32573e-14	-0.233162	0.096	0.205	3.48859e-11
FBgn0029824	CG3726	CG3726	4.0721e-14	0.084697	0.243	0.17	6.10815e-11
FBgn0019662	CG8593	qm	5.29316e-14	0.0473804	0.14	0.1	7.93973e-11
FBgn0036789	CG13702	AstC-R2	6.06625e-14	0.138349	0.18	0.1	9.09937e-11
FBgn0032666	CG5758	CG5758	8.56819e-14	0.155077	0.209	0.119	1.28523e-10
FBgn0040765	CG33473	luna	1.3216e-12	0.20254	0.337	0.234	1.98241e-09
FBgn0052066	CG32066	CG32066	1.61809e-12	0.0772087	0.163	0.095	2.42713e-09
FBgn0051163	CG31163	SKIP	2.44135e-12	0.242569	0.309	0.194	3.66203e-09
FBgn0036801	CG6896	MYPT-75D	4.00763e-12	0.132988	0.208	0.114	6.01145e-09
FBgn0020621	CG2049	Pkn	4.03994e-12	0.0551504	0.104	0.05	6.05991e-09
FBgn0260971	CG42594	CG42594	4.0448e-12	0.167072	0.192	0.114	6.0672e-09
FBgn0066101	CG31094	LpR1	4.29712e-12	0.081351	0.15	0.082	6.44568e-09
FBgn0000179	CG3578	bi	5.79747e-12	0.231045	0.171	0.079	8.69621e-09
FBgn0000547	CG12676	ed	5.93258e-12	0.134607	0.284	0.187	8.89887e-09
FBgn0000028	CG9151	acj6	6.62011e-12	0.169019	0.101	0.033	9.93017e-09
FBgn0262160	CG9932	CG9932	7.01773e-12	0.188887	0.318	0.209	1.05266e-08
FBgn0259677	CG42346	CG42346	8.48998e-12	0.0701966	0.142	0.076	1.2735e-08
FBgn0087012	CG1056	5-HT2A	9.1173e-12	0.183383	0.182	0.09	1.36759e-08
FBgn0267519	CR45859	28SrRNA-Psi:CR45859	1.87871e-11	-0.0884106	0.054	0.108	2.81807e-08
FBgn0250867	CG42238	CG42238	2.11792e-11	0.099834	0.282	0.218	3.17687e-08
FBgn0261260	CG42611	mgl	3.80024e-11	0.0499704	0.126	0.075	5.70036e-08
FBgn0030272	CG15201	CG15201	1.21816e-10	0.0991536	0.183	0.11	1.82724e-07
FBgn0031299	CG4629	CG4629	1.35541e-10	0.07842	0.182	0.124	2.03312e-07
FBgn0283499	CG18402	InR	1.36422e-10	0.0721351	0.162	0.101	2.04633e-07
FBgn0031897	CG13784	CG13784	1.79027e-10	0.0514002	0.26	0.206	2.68541e-07
FBgn0086604	CG12484	side-VIII	3.84746e-10	0.0930807	0.163	0.093	5.77119e-07
FBgn0052626	CG32626	AMPdeam	4.8748e-10	0.0631996	0.153	0.095	7.31219e-07
FBgn0051324	CG31324	CG31324	7.82641e-10	0.172606	0.354	0.268	1.17396e-06
FBgn0262473	CG5490	Tl	9.79444e-10	0.0774663	0.142	0.079	1.46917e-06
FBgn0085384	CG34355	CG34355	1.11612e-09	0.136131	0.152	0.07	1.67418e-06
FBgn0033405	CG13954	CG13954	1.16501e-09	0.172902	0.296	0.204	1.74751e-06
FBgn0015229	CG6575	glec	1.50372e-09	0.494316	0.488	0.328	2.25559e-06
FBgn0264090	CG43759	CG43759	1.65049e-09	0.0906198	0.137	0.082	2.47573e-06
FBgn0265595	CG44422	CG44422	1.67149e-09	0.275707	0.284	0.167	2.50724e-06
FBgn0033403	CG13739	CG13739	1.72506e-09	0.219034	0.247	0.138	2.58758e-06
FBgn0285926	CG1691	Imp	2.129e-09	0.167989	0.105	0.037	3.1935e-06
FBgn0283651	CG46301	CG46301	3.6777e-09	0.0747329	0.114	0.059	5.51655e-06
FBgn0270928	CG32848	VAChT	3.94814e-09	-0.197615	0.498	0.56	5.92221e-06
FBgn0003301	CG9533	rut	1.30579e-08	0.0738915	0.198	0.132	1.95868e-05
FBgn0035495	CG14989	CG14989	1.89268e-08	1.07099	0.504	0.461	2.83901e-05
FBgn0262782	CG5362	Mdh1	1.99238e-08	0.0376042	0.144	0.106	2.98858e-05
FBgn0003091	CG6622	Pkc53E	2.14122e-08	0.547022	0.478	0.29	3.21183e-05
FBgn0264442	CG43860	ab	2.19349e-08	0.112088	0.165	0.091	3.29023e-05
FBgn0015777	CG9261	nrv2	2.22764e-08	0.0423596	0.159	0.117	3.34146e-05
FBgn0285963	CG46339	CG46339	2.35338e-08	0.0298805	0.116	0.078	3.53007e-05
FBgn0024321	CG8524	NK7.1	2.45829e-08	0.0557785	0.142	0.089	3.68743e-05
FBgn0262614	CG43140	pyd	3.22335e-08	0.0333539	0.236	0.173	4.83503e-05
FBgn0052698	CG32698	CARPB	3.47226e-08	0.17023	0.101	0.047	5.20839e-05
FBgn0050463	CG30463	Pgant9	3.77982e-08	0.14315	0.25	0.164	5.66973e-05
FBgn0261698	CG42732	SLO2	4.69572e-08	0.113079	0.267	0.195	7.04358e-05
FBgn0037015	CG13253	cmpy	5.86311e-08	0.0649326	0.218	0.169	8.79467e-05
FBgn0260941	CG42318	app	6.64505e-08	0.108043	0.214	0.146	9.96757e-05
FBgn0263930	CG4974	dally	6.65543e-08	0.11663	0.266	0.203	9.98314e-05
FBgn0086680	CG10037	vvl	6.66249e-08	0.276529	0.265	0.191	9.99373e-05
FBgn0051814	CG31814	DIP-kappa	7.23109e-08	0.136728	0.168	0.106	0.000108466
FBgn0261556	CG42674	CG42674	8.45831e-08	0.237336	0.267	0.166	0.000126875
FBgn0013718	CG33991	nuf	8.49693e-08	0.0435186	0.125	0.083	0.000127454
FBgn0085426	CG34397	Rgk3	1.08424e-07	0.0248597	0.108	0.086	0.000162636
FBgn0052521	CG32521	CG32521	1.12602e-07	0.0354538	0.119	0.087	0.000168904
FBgn0013733	CG18076	shot	1.19181e-07	0.0822434	0.252	0.182	0.000178772
FBgn0261588	CG42698	pdm3	1.2891e-07	0.103516	0.133	0.074	0.000193365
FBgn0004595	CG17228	pros	1.80831e-07	2.62517	0.911	0.89	0.000271246
FBgn0017590	CG6669	klg	2.11005e-07	-0.395263	0.456	0.433	0.000316508
FBgn0031530	CG3254	Pgant2	2.69978e-07	0.0537038	0.117	0.077	0.000404968
FBgn0283451	CG11491	br	4.02655e-07	0.171358	0.119	0.057	0.000603982
FBgn0031738	CG9171	CG9171	4.39296e-07	0.0608222	0.109	0.06	0.000658944
FBgn0264339	CG43795	CG43795	4.52562e-07	0.0320303	0.167	0.113	0.000678843
FBgn0033159	CG17800	Dscam1	4.89094e-07	0.0589744	0.113	0.065	0.00073364
FBgn0036725	CG18265	CG18265	5.80016e-07	0.0270257	0.105	0.073	0.000870024
FBgn0029663	CG10804	CG10804	8.13845e-07	0.165648	0.225	0.124	0.00122077
FBgn0014859	CG1864	Hr38	8.33227e-07	0.097728	0.257	0.18	0.00124984
FBgn0035756	CG32381	unc-13-4A	8.44293e-07	0.0633887	0.149	0.099	0.00126644
FBgn0000635	CG3665	Fas2	9.65129e-07	0.217899	0.228	0.115	0.00144769
FBgn0267910	CR34335	lncRNA:CR34335	1.005e-06	13.1109	0.997	0.982	0.0015075
FBgn0031770	CG13995	CG13995	1.00698e-06	0.0651458	0.145	0.087	0.00151047
FBgn0003499	CG7847	sr	1.09205e-06	0.0718624	0.136	0.081	0.00163807
FBgn0265182	CG44247	CG44247	1.25085e-06	0.0422311	0.141	0.096	0.00187627
FBgn0261113	CG17836	Xrp1	1.70948e-06	0.0667281	0.168	0.111	0.00256421
FBgn0033987	CG12424	ckn	1.73384e-06	0.102576	0.186	0.121	0.00260077
FBgn0040532	CG8369	CG8369	2.11794e-06	0.0804719	0.179	0.132	0.00317691
FBgn0264000	CG43743	GluRIB	2.1746e-06	0.332886	0.343	0.22	0.00326191
FBgn0004168	CG16720	5-HT1A	2.26303e-06	0.109044	0.131	0.072	0.00339454
FBgn0001085	CG17697	fz	2.26394e-06	0.0301069	0.173	0.13	0.00339591
FBgn0030913	CG6123	CG6123	2.26713e-06	0.0453285	0.112	0.073	0.0034007
FBgn0038498	CG14334	beat-IIa	2.48457e-06	0.182806	0.297	0.205	0.00372686
FBgn0261988	CG17998	Gprk2	2.53285e-06	0.189507	0.349	0.267	0.00379928
FBgn0011656	CG1429	Mef2	3.15935e-06	0.0526727	0.228	0.185	0.00473902
FBgn0000037	CG4356	mAChR-A	3.87234e-06	0.0410475	0.3	0.271	0.00580851
FBgn0015519	CG2302	nAChRalpha3	3.90293e-06	-0.0333064	0.21	0.209	0.00585439
FBgn0261928	CG42795	CG42795	4.39456e-06	0.0716342	0.239	0.184	0.00659185
FBgn0028369	CG3653	kirre	4.5501e-06	0.186925	0.341	0.251	0.00682515
FBgn0004395	CG4620	unk	4.8735e-06	0.0865526	0.217	0.154	0.00731025
FBgn0264503	CG43902	CG43902	6.84522e-06	0.123376	0.295	0.233	0.0102678
FBgn0261509	CG14351	haf	7.11686e-06	0.0856596	0.144	0.09	0.0106753
FBgn0031306	CG4577	CG4577	7.99475e-06	0.0795855	0.207	0.149	0.0119921
FBgn0032629	CG15138	beat-IIIc	8.0806e-06	0.180988	0.322	0.237	0.0121209
FBgn0000567	CG32180	Eip74EF	8.45882e-06	0.0167193	0.118	0.09	0.0126882
FBgn0243512	CG7850	puc	9.01289e-06	0.0118804	0.115	0.093	0.0135193
FBgn0027589	CG1688	CG1688	1.03892e-05	0.0743233	0.173	0.12	0.0155839
FBgn0039209	CG13624	REPTOR	1.05609e-05	0.0522181	0.249	0.202	0.0158413
FBgn0065099	CR33925	snRNA:7SK	1.06323e-05	2.03643	0.958	0.909	0.0159485
FBgn0037676	CG8861	CG8861	1.08729e-05	-0.0095162	0.34	0.304	0.0163093
FBgn0034753	CG2852	CG2852	1.24654e-05	0.0776687	0.297	0.245	0.018698
FBgn0263773	CG43690	fok	1.28023e-05	0.125164	0.261	0.192	0.0192034
FBgn0033446	CG1648	CG1648	1.65635e-05	0.0197104	0.126	0.099	0.0248453
FBgn0085399	CG34370	CG34370	1.79487e-05	0.0526583	0.162	0.116	0.0269231
FBgn0052183	CG32183	Ccn	1.79742e-05	0.0332878	0.135	0.104	0.0269612
FBgn0040397	CG3655	CG3655	1.98122e-05	0.0414354	0.192	0.142	0.0297182
FBgn0261046	CG31190	Dscam3	2.00447e-05	0.0592014	0.128	0.077	0.030067
FBgn0037521	CG2993	CG2993	2.0509e-05	0.0410331	0.273	0.223	0.0307636
FBgn0051361	CG31361	dpr17	2.21801e-05	0.0645549	0.139	0.096	0.0332702
FBgn0000097	CG3166	aop	2.2245e-05	0.0783365	0.196	0.136	0.0333675
FBgn0037153	CG12673	olf413	2.41109e-05	0.0952461	0.199	0.135	0.0361663
FBgn0034286	CG33996	dpr13	2.73998e-05	0.325486	0.426	0.307	0.0410997
FBgn0031971	CG7224	Sirup	2.78354e-05	0.0296079	0.106	0.082	0.0417531
FBgn0053143	CG33143	CG33143	3.01701e-05	0.0539296	0.244	0.188	0.0452551
FBgn0011666	CG5099	msi	3.24364e-05	0.77536	0.657	0.497	0.0486545
FBgn0260964	CG33528	Vmat	3.28648e-05	-0.26369	0.107	0.138	0.0492972
FBgn0261258	CG6014	rgn	3.32825e-05	0.0457897	0.179	0.135	0.0499238
FBgn0027598	CG31012	cindr	3.4402e-05	0.51994	0.556	0.42	0.051603
FBgn0085412	CG34383	kmr	3.59481e-05	0.0702104	0.242	0.201	0.0539221
FBgn0010452	CG11280	trn	3.62258e-05	0.157947	0.195	0.132	0.0543387
FBgn0019985	CG11144	mGluR	3.69904e-05	-0.0221821	0.184	0.166	0.0554856
FBgn0036494	CG7250	Toll-6	4.11472e-05	0.298189	0.334	0.213	0.0617209
FBgn0015774	CG10521	NetB	4.36899e-05	0.00248909	0.2	0.192	0.0655349
FBgn0039349	CG4685	Ssadh	4.45787e-05	0.0286081	0.137	0.103	0.0668681
FBgn0030505	CG11172	NFAT	4.5409e-05	0.0636601	0.247	0.199	0.0681134
FBgn0031016	CG12199	kek5	5.36047e-05	0.0319325	0.131	0.096	0.080407
FBgn0001186	CG3001	Hex-A	5.93319e-05	1.06575	0.608	0.378	0.0889978
FBgn0284245	CG8280	eEF1alpha1	6.52626e-05	0.0287125	0.257	0.227	0.0978939
FBgn0002868	CG9470	MtnA	7.22353e-05	0.22503	0.357	0.239	0.108353
FBgn0052600	CG32600	dpr8	7.96298e-05	0.174544	0.336	0.254	0.119445
FBgn0260660	CG42543	Mp	9.18313e-05	0.0224871	0.285	0.233	0.137747
FBgn0003274	CG4918	RpLP2	0.000104325	-0.103516	0.46	0.476	0.156487
FBgn0052432	CG32432	CG32432	0.000106113	0.00577506	0.283	0.245	0.15917
FBgn0264975	CG1634	Nrg	0.000109391	0.00398195	0.135	0.121	0.164087
FBgn0020269	CG10145	mspo	0.000109824	0.0754589	0.185	0.144	0.164736
FBgn0263219	CG42330	Dscam4	0.000136297	0.086128	0.239	0.195	0.204446
FBgn0023534	CG17778	CG17778	0.000154532	0.03852	0.186	0.148	0.231798
FBgn0023179	CG6438	amon	0.000157143	0.0926855	0.287	0.213	0.235714
FBgn0044328	CG32052	CG32052	0.000174228	0.0326441	0.141	0.117	0.261341
FBgn0000303	CG12345	ChAT	0.000178366	-0.0247888	0.313	0.306	0.26755
FBgn0030158	CG9686	CG9686	0.000179002	0.0501067	0.112	0.078	0.268503
FBgn0039420	CG6154	CG6154	0.000186934	0.0255713	0.134	0.104	0.280401
FBgn0036043	CG8177	CG8177	0.000188972	-0.00376577	0.218	0.201	0.283458
FBgn0040823	CG14162	dpr6	0.000194059	0.079887	0.329	0.269	0.291088
FBgn0032840	CG13968	sNPF	0.000201333	-0.281419	0.229	0.247	0.301999
FBgn0033544	CG7220	CG7220	0.000222885	0.0234053	0.172	0.15	0.334328
FBgn0266801	CG45263	CG45263	0.000234141	-0.0801764	0.383	0.356	0.351211
FBgn0031294	CG31795	IA-2	0.000241859	2.22547	0.962	0.976	0.362788
FBgn0261285	CG5629	Ppcs	0.00025091	0.0321444	0.137	0.104	0.376365
FBgn0052017	CG32017	CG32017	0.000266372	0.0403347	0.355	0.32	0.399558
FBgn0262738	CG3620	norpA	0.000287272	0.0298835	0.386	0.385	0.430908
FBgn0051760	CG31760	CG31760	0.000319672	0.0222775	0.109	0.086	0.479508
FBgn0262593	CG43128	Shab	0.000328001	0.135667	0.33	0.257	0.492001
FBgn0011582	CG9652	Dop1R1	0.000349999	0.0555287	0.117	0.076	0.524999
FBgn0040726	CG13439	dpr1	0.000371052	-0.0593287	0.379	0.377	0.556577
FBgn0085409	CG34380	smal	0.000382383	0.00248249	0.146	0.128	0.573575
FBgn0035041	CG13594	CG13594	0.000391937	0.0480092	0.116	0.076	0.587906
FBgn0286778	CG46385	CG46385	0.000410975	0.0502413	0.246	0.199	0.616463
FBgn0259244	CG42342	CG42342	0.000494463	-0.00846412	0.336	0.312	0.741695
FBgn0000636	CG5803	Fas3	0.000529595	0.0201331	0.216	0.182	0.794392
FBgn0261871	CG33507	dpr2	0.000574188	0.0358249	0.112	0.076	0.861283
FBgn0001235	CG17117	hth	0.000610313	0.337695	0.344	0.24	0.91547
FBgn0005771	CG4491	noc	0.000661967	0.00455783	0.102	0.082	0.992951
FBgn0038980	CG6919	Octbeta1R	0.000681745	0.0916725	0.116	0.072	1
FBgn0263706	CG43658	CG43658	0.000685951	0.00454222	0.137	0.125	1
FBgn0066084	CG30425	RpL41	0.000713302	1.80834	0.774	0.724	1
FBgn0001091	CG12055	Gapdh1	0.000715779	0.0682786	0.3	0.262	1
FBgn0028370	CG4192	kek3	0.00074533	0.0545667	0.143	0.108	1
FBgn0284243	CG9277	betaTub56D	0.000752824	0.0987807	0.318	0.261	1
FBgn0264273	CG33960	Sema2b	0.000779311	0.0503716	0.133	0.1	1
FBgn0033192	CG2105	Corin	0.000843786	0.134615	0.311	0.231	1
FBgn0052677	CG32677	X11Lbeta	0.000933634	0.0683393	0.302	0.247	1
FBgn0052204	CG32204	CG32204	0.000946567	0.0130688	0.149	0.128	1
FBgn0042696	CG2380	NfI	0.00100353	0.0215041	0.211	0.18	1
FBgn0259242	CG42340	CG42340	0.00111254	0.00477582	0.23	0.217	1
FBgn0039584	CG14064	beat-VI	0.00113939	-0.00568198	0.244	0.222	1
FBgn0037913	CG6783	fabp	0.00114074	-0.0863742	0.122	0.147	1
FBgn0085407	CG34378	Pvf3	0.00119398	0.471677	0.545	0.428	1
FBgn0085397	CG34368	Fili	0.00124308	0.0472519	0.107	0.073	1
FBgn0020907	CG14904	Scp2	0.00126135	0.138689	0.214	0.156	1
FBgn0027608	CG2082	CG2082	0.00134821	0.0522463	0.354	0.314	1
FBgn0259170	CG42275	alpha-Man-Ia	0.00140834	-0.022379	0.203	0.192	1
FBgn0085400	CG34371	side-V	0.00140954	0.0273206	0.145	0.105	1
FBgn0038826	CG17838	Syp	0.00156661	-0.00573122	0.427	0.416	1
FBgn0000116	CG32031	Argk	0.00159546	0.0152871	0.744	0.791	1
FBgn0039380	CG5890	CG5890	0.00163544	-0.111903	0.244	0.275	1
FBgn0030090	CG12664	fend	0.00164426	0.108951	0.257	0.205	1
FBgn0004910	CG15855	Eip63F-1	0.00169765	0.0543241	0.177	0.129	1
FBgn0038665	CG12269	euc	0.00174702	0.0163331	0.103	0.086	1
FBgn0267322	CR45758	lncRNA:CR45758	0.00176425	0.066297	0.113	0.075	1
FBgn0085413	CG34384	CG34384	0.00186126	0.0443953	0.247	0.205	1
FBgn0027654	CG2239	jdp	0.00188136	0.398815	0.505	0.436	1
FBgn0013688	CR34096	mt:srRNA	0.00200619	-0.0628537	0.107	0.151	1
FBgn0285952	CG3186	eEF5	0.0020634	0.0343165	0.247	0.217	1
FBgn0085387	CG34358	shakB	0.00216184	0.234973	0.313	0.254	1
FBgn0004516	CG14994	Gad1	0.00218691	0.115087	0.141	0.072	1
FBgn0083975	CG34139	Nlg4	0.00223761	-0.0122767	0.165	0.145	1
FBgn0004449	CG5723	Ten-m	0.00239315	0.0141431	0.229	0.213	1
FBgn0011818	CG9884	oaf	0.00255871	0.0479107	0.114	0.085	1
FBgn0265598	CG44425	Bx	0.00263394	-0.00257617	0.12	0.104	1
FBgn0051619	CG31619	nolo	0.00270156	0.0790259	0.157	0.11	1
FBgn0262737	CG7437	mub	0.00295122	0.0827718	0.739	0.793	1
FBgn0036935	CG14186	CG14186	0.00322864	0.0184229	0.135	0.107	1
FBgn0030174	CG15312	CG15312	0.00396316	0.0359835	0.156	0.125	1
FBgn0028481	CG4341	CG4341	0.00402084	-0.029785	0.181	0.178	1
FBgn0000575	CG1007	emc	0.00433498	-0.0496203	0.409	0.377	1
FBgn0036927	CG7433	Gabat	0.0043695	0.0119476	0.195	0.17	1
FBgn0010113	CG15532	hdc	0.00448963	0.551793	0.391	0.23	1
FBgn0259821	CG42402	CG42402	0.00454873	-0.0155351	0.3	0.283	1
FBgn0010313	CG2530	corto	0.00499515	0.106535	0.322	0.253	1
FBgn0033268	CG2297	Obp44a	0.00501181	0.27513	0.247	0.186	1
FBgn0085383	CG34354	CG34354	0.00518875	-0.0578869	0.18	0.208	1
FBgn0031736	CG11030	CG11030	0.00551259	0.0324249	0.112	0.081	1
FBgn0053179	CG33179	beat-IIIb	0.0060295	-0.0138543	0.304	0.267	1
FBgn0036144	CG6207	GlcAT-P	0.00628163	0.0275854	0.164	0.137	1
FBgn0261999	CG42817	Ca-Ma2d	0.00642204	0.056074	0.116	0.078	1
FBgn0031414	CG33955	eys	0.00645496	0.204043	0.402	0.312	1
FBgn0039089	CG10152	beat-IV	0.0064736	0.034227	0.112	0.082	1
FBgn0261597	CG10305	RpS26	0.00674206	-0.413433	0.704	0.865	1
FBgn0261836	CG42768	Msp300	0.00723167	0.27039	0.573	0.578	1
FBgn0032901	CG9339	sky	0.00794774	0.123519	0.41	0.339	1
FBgn0031835	CG11319	CG11319	0.00796057	0.00692622	0.246	0.218	1
FBgn0051774	CG31774	fred	0.00802848	-0.100264	0.239	0.252	1
FBgn0010300	CG10719	brat	0.00812466	0.0461146	0.239	0.199	1
FBgn0260793	CG42573	2mit	0.00833721	0.0231861	0.125	0.1	1
FBgn0267668	CR46006	lncRNA:CR46006	0.00868702	0.048295	0.282	0.233	1
FBgn0033484	CG2269	CG2269	0.00905319	0.531964	0.541	0.461	1
FBgn0264386	CG15899	Ca-alpha1T	0.00934395	0.340892	0.506	0.472	1
FBgn0085382	CG34353	CG34353	0.00943181	0.0610401	0.225	0.184	1
FBgn0016797	CG9739	fz2	0.00958371	0.0639027	0.202	0.165	1
FBgn0051221	CG31221	CG31221	0.0098726	3.06712	0.92	0.938	1
FBgn0031374	CG7337	Wdr62	0.0112551	0.355428	0.462	0.349	1
FBgn0001233	CG1242	Hsp83	0.0116091	-0.134541	0.427	0.441	1
FBgn0263397	CG8585	Ih	0.0116338	1.05164	0.804	0.824	1
FBgn0038246	CG14853	CG14853	0.0133364	-0.00398495	0.178	0.162	1
FBgn0041605	CG32490	cpx	0.0138845	0.740116	0.984	0.99	1
FBgn0053517	CG33517	Dop2R	0.0150675	0.868407	0.699	0.724	1
FBgn0013973	CG1470	Gycbeta100B	0.0161498	-0.00186397	0.122	0.108	1
FBgn0011224	CG31000	heph	0.0170232	0.562035	0.532	0.417	1
FBgn0260658	CG42541	CG42541	0.0176215	-0.361022	0.586	0.612	1
FBgn0083950	CG34114	side-VI	0.0176713	0.30364	0.413	0.294	1
FBgn0010412	CG4464	RpS19a	0.0185978	-0.0225081	0.232	0.216	1
FBgn0263289	CG43398	scrib	0.018717	0.017575	0.113	0.091	1
FBgn0028645	CG7644	beat-Ib	0.0195306	0.00775852	0.287	0.268	1
FBgn0030897	CG5744	Frq1	0.0203772	0.85231	0.698	0.567	1
FBgn0052406	CG32406	PVRAP	0.0205523	0.0305543	0.117	0.091	1
FBgn0085753	CR40596	28SrRNA-Psi:CR40596	0.0208081	0.00826775	0.16	0.134	1
FBgn0029123	CG18024	SoxN	0.0216997	0.667275	0.557	0.477	1
FBgn0052506	CG32506	CG32506	0.0244847	-0.0269753	0.179	0.175	1
FBgn0013467	CG18285	igl	0.0264635	0.282713	0.529	0.469	1
FBgn0267033	CG45477	mamo	0.030142	0.49462	0.601	0.557	1
FBgn0053543	CG33543	CG33543	0.0313048	0.276274	0.305	0.203	1
FBgn0260003	CG34157	Dys	0.0321008	-0.0129733	0.154	0.149	1
FBgn0033108	CG15236	CG15236	0.0321445	0.0203757	0.187	0.17	1
FBgn0010114	CG2040	hig	0.032767	0.30532	0.455	0.372	1
FBgn0034978	CG3257	CG3257	0.0328897	0.0363245	0.134	0.097	1
FBgn0035816	CG13685	CG13685	0.0343211	-0.0476405	0.142	0.152	1
FBgn0264308	CG43778	CG43778	0.03589	0.00888087	0.181	0.167	1
FBgn0086778	CG32538	nAChRalpha7	0.0366686	0.312848	0.429	0.325	1
FBgn0000273	CG4379	Pka-C1	0.0375336	0.054007	0.507	0.52	1
FBgn0015400	CG4977	kek2	0.038052	0.0835062	0.342	0.293	1
FBgn0259213	CG42313	side-II	0.0393873	0.0923589	0.313	0.265	1
FBgn0034725	CG6044	CG6044	0.0396023	0.0292722	0.298	0.267	1
FBgn0000422	CG10697	Ddc	0.0410074	-0.0707989	0.212	0.22	1
FBgn0038653	CG18208	Octalpha2R	0.0411675	0.0955097	0.27	0.217	1
FBgn0264087	CG43756	Slob	0.042048	-0.0389325	0.181	0.187	1
FBgn0085421	CG34392	Epac	0.0423217	0.0455015	0.211	0.17	1
FBgn0029939	CG9650	CG9650	0.044407	0.193557	0.418	0.371	1
FBgn0028644	CG4838	beat-Ic	0.0451958	0.487256	0.455	0.36	1
FBgn0010263	CG3151	Rbp9	0.0474824	0.0835891	0.353	0.334	1
FBgn0250908	CG42242	beat-VII	0.0488881	0.0518704	0.164	0.139	1
FBgn0004244	CG10537	Rdl	0.0493789	0.391428	0.932	0.936	1
FBgn0260943	CG32169	Rbp6	0.0495547	1.88984	0.903	0.929	1
FBgn0002643	CG8118	mam	0.0508618	0.0537182	0.188	0.149	1
FBgn0259243	CG42341	Pka-R1	0.0541966	0.0465391	0.204	0.169	1
FBgn0014184	CG16747	Oda	0.0542431	0.0246928	0.532	0.553	1
FBgn0030723	CG14948	dpr18	0.0547884	0.0341363	0.103	0.075	1
FBgn0261089	CG5559	Sytalpha	0.054862	-0.0125494	0.167	0.144	1
FBgn0263994	CG43737	CG43737	0.0562949	0.231707	0.464	0.371	1
FBgn0003423	CG1417	slgA	0.0564506	0.0801134	0.364	0.325	1
FBgn0024189	CG33141	sns	0.0581441	0.0176735	0.109	0.094	1
FBgn0052206	CG32206	CG32206	0.0586463	0.0136813	0.222	0.21	1
FBgn0030574	CG9413	sbm	0.0681545	0.0170904	0.109	0.092	1
FBgn0266100	CG44837	CG44837	0.0698587	0.0104037	0.109	0.097	1
FBgn0033438	CG1794	Mmp2	0.0705973	0.00671485	0.193	0.164	1
FBgn0030432	CG4404	CG4404	0.0710071	-0.024748	0.089	0.101	1
FBgn0267336	CG34360	Glut4EF	0.0745384	0.53557	0.786	0.857	1
FBgn0036454	CG17839	CG17839	0.07594	-0.0280208	0.206	0.202	1
FBgn0261574	CG7749	kug	0.0766866	0.0236557	0.114	0.093	1
FBgn0085434	CG34405	NaCP60E	0.077287	0.450801	0.582	0.495	1
FBgn0027356	CG8604	Amph	0.0804985	0.00408043	0.137	0.12	1
FBgn0083949	CG34113	side-III	0.0816713	0.259738	0.546	0.462	1
FBgn0264001	CG43744	bru3	0.0851345	0.11851	0.436	0.405	1
FBgn0011661	CG10701	Moe	0.0860914	0.026397	0.113	0.092	1
FBgn0038839	CG10830	Ktl	0.0862082	0.000232395	0.236	0.202	1
FBgn0032797	CG10186	Hasp	0.0883431	0.335835	0.683	0.738	1
FBgn0028704	CG18660	Nckx30C	0.0907318	0.0306378	0.679	0.78	1
FBgn0003360	CG16944	sesB	0.0983419	0.0664777	0.683	0.848	1
FBgn0029814	CG15765	CG15765	0.0988456	0.0272851	0.382	0.342	1
FBgn0038237	CG8279	Pde6	0.0996072	0.277469	0.423	0.321	1
FBgn0250910	CG42244	Octbeta3R	0.102711	-0.00259118	0.142	0.131	1
FBgn0000411	CG5893	D	0.107886	0.00280076	0.109	0.093	1
FBgn0264490	CG18389	Eip93F	0.109627	0.278583	0.366	0.262	1
FBgn0039938	CG11153	Sox102F	0.112226	-0.0281715	0.14	0.145	1
FBgn0000633	CG17716	CG17716	0.112898	0.419922	0.499	0.4	1
FBgn0263995	CG43738	cpo	0.112981	0.0275115	0.686	0.71	1
FBgn0052647	CG32647	CG32647	0.125373	0.0568672	0.266	0.23	1
FBgn0262509	CG43079	nrm	0.140881	0.0326897	0.132	0.103	1
FBgn0259171	CG42276	Pde9	0.141868	0.0754456	0.477	0.465	1
FBgn0004242	CG3139	Syt1	0.144683	0.172478	0.714	0.866	1
FBgn0265296	CG42256	Dscam2	0.149186	0.457498	0.656	0.596	1
FBgn0041094	CG7590	scyl	0.150534	0.100056	0.511	0.452	1
FBgn0261262	CG42613	CG42613	0.152739	0.566027	0.514	0.388	1
FBgn0263220	CG43388	Hk	0.154558	0.31266	0.653	0.59	1
FBgn0010411	CG8900	RpS18	0.164922	-0.255205	0.726	0.885	1
FBgn0265002	CG44153	CG44153	0.17196	0.0213071	0.213	0.187	1
FBgn0263257	CG43395	Cngl	0.174412	0.883435	0.745	0.725	1
FBgn0267001	CG42338	Ten-a	0.176507	0.973411	0.813	0.783	1
FBgn0250839	CG2016	CG2016	0.176955	0.0577386	0.153	0.132	1
FBgn0263511	CG4136	Vsx1	0.179219	-0.0213179	0.115	0.113	1
FBgn0003435	CG9218	sm	0.180721	0.29069	0.76	0.86	1
FBgn0042630	CG32139	Sox21b	0.183667	0.0374679	0.108	0.087	1
FBgn0004509	CG10772	Fur1	0.183826	0.0138567	0.12	0.11	1
FBgn0014163	CG4609	fax	0.185663	0.463965	0.505	0.363	1
FBgn0000108	CG7727	Appl	0.19038	0.340354	0.733	0.843	1
FBgn0052264	CG32264	CG32264	0.191542	0.360231	0.607	0.555	1
FBgn0053202	CG33202	dpr11	0.19457	-7.80657e-05	0.205	0.187	1
FBgn0004369	CG11516	Ptp99A	0.196794	0.589718	0.625	0.506	1
FBgn0085391	CG34362	trv	0.198334	0.413185	0.567	0.534	1
FBgn0010415	CG10497	Sdc	0.20192	0.196825	0.577	0.518	1
FBgn0259111	CG42253	Ndae1	0.204526	0.00284639	0.102	0.098	1
FBgn0264895	CG44086	RapGAP1	0.205668	0.16372	0.451	0.412	1
FBgn0287186	CG17594	scro	0.205709	-0.0701486	0.312	0.317	1
FBgn0034731	CG10384	CG10384	0.205874	-0.0209246	0.163	0.158	1
FBgn0004198	CG11387	ct	0.207391	1.25926	0.649	0.57	1
FBgn0004611	CG4574	Plc21C	0.208888	0.0879211	0.346	0.296	1
FBgn0003165	CG9755	pum	0.209069	0.179099	0.711	0.759	1
FBgn0033250	CG14762	CG14762	0.214219	-0.01802	0.371	0.367	1
FBgn0030412	CG17762	Tomosyn	0.214368	0.278261	0.528	0.461	1
FBgn0000024	CG17907	Ace	0.215167	0.11685	0.556	0.54	1
FBgn0031632	CG15628	CG15628	0.21564	0.0392508	0.408	0.378	1
FBgn0000036	CG5610	nAChRalpha1	0.225423	0.0176783	0.286	0.271	1
FBgn0003380	CG12348	Sh	0.231067	0.38925	0.87	0.931	1
FBgn0033356	CG8229	CG8229	0.231094	-0.0336307	0.088	0.103	1
FBgn0264606	CG43955	Fife	0.234214	0.0247504	0.332	0.31	1
FBgn0052062	CG32062	Rbfox1	0.235439	0.793176	0.808	0.819	1
FBgn0039054	CG13830	Cow	0.242064	0.00456864	0.384	0.367	1
FBgn0003326	CG17579	sca	0.248423	0.0108505	0.108	0.095	1
FBgn0264574	CG43946	Glut1	0.27141	-0.030869	0.283	0.273	1
FBgn0036165	CG7533	chrb	0.272012	0.162664	0.538	0.52	1
FBgn0004858	CG4220	elB	0.273579	0.0418144	0.148	0.124	1
FBgn0263392	CG43444	Tet	0.277913	0.0307573	0.606	0.583	1
FBgn0263353	CG11000	CG11000	0.278759	0.32931	0.46	0.344	1
FBgn0027339	CG11352	jim	0.281836	0.147084	0.969	0.989	1
FBgn0023095	CG11282	caps	0.281863	0.0203541	0.111	0.092	1
FBgn0028875	CG32975	nAChRalpha5	0.286756	0.28701	0.661	0.616	1
FBgn0085395	CG34366	Shawl	0.289231	-0.015881	0.12	0.121	1
FBgn0001234	CR31400	lncRNA:Hsromega	0.291757	0.233569	0.963	0.991	1
FBgn0015399	CG12283	kek1	0.299901	0.222795	0.403	0.35	1
FBgn0038282	CG33485	dpr9	0.300836	0.310841	0.399	0.311	1
FBgn0004880	CG1130	scrt	0.302486	-0.155891	0.808	0.937	1
FBgn0259108	CG34387	futsch	0.307643	0.859822	0.838	0.855	1
FBgn0085447	CG34418	sif	0.309215	0.958947	0.662	0.566	1
FBgn0039647	CG14509	jus	0.315363	0.188453	0.405	0.357	1
FBgn0285948	CG15442	RpL27A	0.32817	-0.199658	0.693	0.795	1
FBgn0263512	CG33980	Vsx2	0.334048	-0.0572053	0.162	0.18	1
FBgn0033358	CG8216	spab	0.335759	-0.021871	0.099	0.108	1
FBgn0024963	CG7535	GluClalpha	0.340342	0.412898	0.592	0.556	1
FBgn0035032	CG4692	ATPsynF	0.347334	0.31371	0.706	0.732	1
FBgn0005775	CG7503	Con	0.35256	0.544954	0.427	0.313	1
FBgn0266851	CR45312	lncRNA:CR45312	0.377545	-0.0377363	0.192	0.201	1
FBgn0013433	CG4846	beat-Ia	0.400591	-0.0188114	0.097	0.104	1
FBgn0264908	CG44099	pHCl-1	0.404635	-0.0400321	0.292	0.288	1
FBgn0036844	CG14080	Mkp3	0.408866	0.216493	0.473	0.383	1
FBgn0028496	CG30116	CG30116	0.416187	-0.0532342	0.427	0.421	1
FBgn0013576	CG32464	mtd	0.422082	0.181482	0.565	0.531	1
FBgn0034808	CG9896	CG9896	0.423749	-0.011119	0.175	0.163	1
FBgn0000535	CG10952	eag	0.438476	-0.0131715	0.24	0.237	1
FBgn0086677	CG30040	jeb	0.441562	0.365219	0.364	0.262	1
FBgn0265597	CG44424	rad	0.4437	0.148304	0.323	0.302	1
FBgn0004580	CG6702	Cbp53E	0.448413	1.41104	0.703	0.585	1
FBgn0013954	CG11001	Fkbp12	0.449382	0.0734039	0.386	0.35	1
FBgn0002593	CG4087	RpLP1	0.45562	0.0698285	0.689	0.707	1
FBgn0086758	CG31666	chinmo	0.475235	0.12945	0.581	0.566	1
FBgn0000064	CG6058	Ald1	0.48008	0.352024	0.598	0.514	1
FBgn0013686	CR34094	mt:lrRNA	0.482898	-1.89571	0.963	0.989	1
FBgn0083963	CG34127	Nlg3	0.511001	0.00567717	0.567	0.532	1
FBgn0029761	CG10706	SK	0.521144	0.202197	0.401	0.346	1
FBgn0000042	CG4027	Act5C	0.526988	0.125675	0.449	0.419	1
FBgn0041707	CG1168	7B2	0.529065	0.164027	0.579	0.553	1
FBgn0032400	CG6770	CG6770	0.532432	0.493562	0.64	0.532	1
FBgn0029897	CG3203	RpL17	0.533863	-0.0257785	0.545	0.543	1
FBgn0032833	CG10664	COX4	0.560749	0.0255437	0.684	0.755	1
FBgn0010473	CG15427	tutl	0.56105	0.290998	0.526	0.445	1
FBgn0259234	CG42332	Camta	0.567345	0.027843	0.145	0.128	1
FBgn0026160	CG7958	tna	0.579965	0.241081	0.516	0.424	1
FBgn0264815	CG44007	Pde1c	0.600609	0.0531255	0.291	0.271	1
FBgn0265487	CG33197	mbl	0.617881	0.508741	0.412	0.309	1
FBgn0037874	CG4800	Tctp	0.622233	-0.116781	0.371	0.395	1
FBgn0019650	CG11186	toy	0.634302	-0.00425218	0.28	0.279	1
FBgn0267253	CG32700	CG32700	0.643265	0.0970092	0.252	0.222	1
FBgn0022382	CG15862	Pka-R2	0.64349	0.0449706	0.27	0.236	1
FBgn0016061	CG31062	side	0.645911	0.105572	0.337	0.293	1
FBgn0262869	CG43224	Gfrl	0.659515	0.025468	0.429	0.404	1
FBgn0033368	CG13743	CG13743	0.678151	0.00792727	0.123	0.116	1
FBgn0001078	CG4059	ftz-f1	0.689854	0.00741564	0.412	0.398	1
FBgn0039064	CG4467	CG4467	0.699921	0.135287	0.403	0.344	1
FBgn0261549	CG42667	rdgA	0.72297	-0.00752433	0.308	0.278	1
FBgn0261788	CG42734	Ank2	0.728433	0.233519	0.616	0.613	1
FBgn0038063	CG33976	Octbeta2R	0.730098	0.208861	0.443	0.361	1
FBgn0085432	CG34403	pan	0.734502	0.066306	0.688	0.707	1
FBgn0261804	CG42750	CG42750	0.7391	0.0323384	0.315	0.306	1
FBgn0053147	CG33147	Hs3st-A	0.741359	0.220842	0.64	0.594	1
FBgn0034138	CG8332	RpS15	0.752205	0.177702	0.804	0.868	1
FBgn0085414	CG34385	dpr12	0.76241	0.0162088	0.333	0.314	1
FBgn0051665	CG31665	wry	0.779399	0.289463	0.424	0.342	1
FBgn0261552	CG42670	ps	0.784712	0.322793	0.877	0.942	1
FBgn0260657	CG42540	CG42540	0.802718	0.0551618	0.622	0.594	1
FBgn0267252	CG3694	Ggamma30A	0.812911	0.245796	0.976	0.98	1
FBgn0015609	CG7100	CadN	0.850783	0.0439846	0.357	0.328	1
FBgn0285944	CG9907	para	0.874021	0.279272	0.738	0.861	1
FBgn0261244	CG33174	inaE	0.884217	0.189429	0.461	0.406	1
FBgn0032151	CG4128	nAChRalpha6	0.902366	0.987605	0.685	0.605	1
FBgn0264006	CG43749	dysc	0.913104	0.156367	0.7	0.724	1
FBgn0037525	CG17816	CG17816	0.941622	0.160949	0.446	0.37	1
FBgn0263980	CG43729	Stacl	0.942672	0.142969	0.496	0.458	1
FBgn0013981	CG3379	His4r	0.958209	0.381353	0.92	0.936	1
FBgn0265052	CG44167	St3	0.975679	0.00633593	0.225	0.22	1
FBgn0003429	CG10693	slo	0.988747	0.181597	0.536	0.495	1
FBgn0267978	CG8376	ap	0.988887	-0.0127157	0.145	0.142	1

## Sheet: Male_C5
FlyBaseID	GeneID	Gene symbol	p_val	avg_diff	pct.1	pct.2	p_val_adj
FBgn0019660	CR32665	lncRNA:roX2	5.22623e-182	-1.72728	0.006	0.694	7.83934e-179
FBgn0004047	CG11129	Yp3	7.1931e-80	0.180057	0.157	0.002	1.07896e-76
FBgn0087002	CG11064	apolpp	3.76081e-32	0.128162	0.173	0.059	5.64122e-29
FBgn0058469	CR40469	lncRNA:CR40469	3.18156e-21	0.0902669	0.157	0.075	4.77235e-18
FBgn0267519	CR45859	28SrRNA-Psi:CR45859	3.98588e-21	-0.0684568	0.061	0.12	5.97882e-18
FBgn0050115	CG30115	GEFmeso	3.05794e-20	0.125212	0.157	0.068	4.58691e-17
FBgn0260429	CG42524	CG42524	2.1929e-16	0.162046	0.24	0.138	3.28936e-13
FBgn0052057	CG32057	dpr10	2.83801e-16	0.156243	0.275	0.174	4.25701e-13
FBgn0036789	CG13702	AstC-R2	9.61209e-16	0.149835	0.209	0.109	1.44181e-12
FBgn0002940	CG4550	ninaE	7.08961e-15	-0.279759	0.144	0.284	1.06344e-11
FBgn0036821	CG3961	CG3961	5.52438e-14	0.0748334	0.118	0.056	8.28657e-11
FBgn0052683	CG32683	CG32683	1.76449e-12	0.164552	0.266	0.162	2.64673e-09
FBgn0083228	CG5907	Frq2	2.34323e-12	0.46325	0.509	0.323	3.51484e-09
FBgn0052626	CG32626	AMPdeam	8.43439e-12	0.102643	0.239	0.163	1.26516e-08
FBgn0037963	CG6977	Cad87A	2.18588e-11	0.0601327	0.142	0.095	3.27883e-08
FBgn0052982	CG32982	CG32982	4.50857e-11	0.150628	0.231	0.151	6.76285e-08
FBgn0051690	CG31690	CG31690	5.64959e-11	0.195671	0.293	0.176	8.47439e-08
FBgn0035495	CG14989	CG14989	9.19872e-10	0.95425	0.382	0.289	1.37981e-06
FBgn0283499	CG18402	InR	1.276e-09	0.0621785	0.254	0.203	1.91401e-06
FBgn0004619	CG8442	GluRIA	1.63129e-09	0.346182	0.373	0.212	2.44693e-06
FBgn0002543	CG5481	robo2	4.08425e-09	0.236039	0.223	0.138	6.12637e-06
FBgn0015766	CG10596	Msr-110	4.3053e-09	0.0546653	0.106	0.059	6.45794e-06
FBgn0004595	CG17228	pros	5.915e-09	18.8181	0.987	0.985	8.8725e-06
FBgn0020621	CG2049	Pkn	7.0849e-09	0.0610854	0.155	0.11	1.06274e-05
FBgn0262473	CG5490	Tl	1.14449e-08	0.148382	0.229	0.13	1.71674e-05
FBgn0038542	CG7431	TyrR	1.56667e-08	0.129567	0.167	0.1	2.35001e-05
FBgn0037475	CG33323	Fer1	1.63139e-08	0.0214339	0.137	0.104	2.44708e-05
FBgn0002945	CG11614	nkd	2.04132e-08	0.272078	0.399	0.264	3.06197e-05
FBgn0250867	CG42238	CG42238	3.03724e-08	0.150436	0.256	0.148	4.55587e-05
FBgn0040877	CG12994	CG12994	6.08868e-08	0.0702027	0.114	0.058	9.13302e-05
FBgn0029768	CG16752	SPR	1.0278e-07	0.243023	0.254	0.139	0.00015417
FBgn0086604	CG12484	side-VIII	1.38589e-07	0.135699	0.279	0.193	0.000207883
FBgn0260971	CG42594	CG42594	1.53191e-07	0.356544	0.384	0.211	0.000229787
FBgn0000636	CG5803	Fas3	1.99532e-07	0.120971	0.322	0.24	0.000299298
FBgn0052066	CG32066	CG32066	3.81949e-07	0.121654	0.233	0.14	0.000572923
FBgn0016797	CG9739	fz2	4.50483e-07	0.114763	0.342	0.264	0.000675725
FBgn0283651	CG46301	CG46301	5.20973e-07	0.246335	0.423	0.336	0.000781459
FBgn0264442	CG43860	ab	6.18582e-07	0.144177	0.355	0.26	0.000927873
FBgn0052521	CG32521	CG32521	6.20808e-07	0.0662605	0.159	0.109	0.000931212
FBgn0264753	CG44011	Rgk1	6.47727e-07	0.093073	0.22	0.159	0.00097159
FBgn0087012	CG1056	5-HT2A	6.8737e-07	0.121034	0.157	0.087	0.00103106
FBgn0264090	CG43759	CG43759	9.03119e-07	0.259154	0.329	0.23	0.00135468
FBgn0004573	CG12073	5-HT7	1.13176e-06	0.0750659	0.181	0.129	0.00169763
FBgn0031299	CG4629	CG4629	1.2399e-06	0.0613336	0.173	0.128	0.00185985
FBgn0031738	CG9171	CG9171	1.46288e-06	0.0745896	0.182	0.125	0.00219431
FBgn0033268	CG2297	Obp44a	1.58719e-06	0.250757	0.254	0.146	0.00238079
FBgn0261260	CG42611	mgl	2.78966e-06	0.119381	0.249	0.168	0.00418449
FBgn0053696	CG33696	CNMaR	2.80862e-06	0.0199766	0.108	0.084	0.00421293
FBgn0285926	CG1691	Imp	2.83205e-06	0.223371	0.146	0.056	0.00424807
FBgn0014859	CG1864	Hr38	3.79374e-06	0.20583	0.303	0.21	0.00569061
FBgn0051475	CG31475	CG31475	5.42254e-06	0.0697465	0.143	0.087	0.00813381
FBgn0267431	CG45784	Myo81F	5.6659e-06	0.0415775	0.112	0.078	0.00849885
FBgn0004395	CG4620	unk	6.44054e-06	0.124248	0.283	0.196	0.0096608
FBgn0019662	CG8593	qm	6.63271e-06	0.116003	0.215	0.139	0.00994906
FBgn0033159	CG17800	Dscam1	7.05414e-06	0.120962	0.337	0.257	0.0105812
FBgn0267322	CR45758	lncRNA:CR45758	8.91591e-06	0.146141	0.266	0.189	0.0133739
FBgn0015400	CG4977	kek2	1.03314e-05	0.0530782	0.405	0.354	0.015497
FBgn0013995	CG5685	Calx	1.11301e-05	0.215219	0.344	0.228	0.0166952
FBgn0283451	CG11491	br	1.18941e-05	0.287917	0.319	0.257	0.0178412
FBgn0033987	CG12424	ckn	1.2e-05	0.0653161	0.189	0.137	0.018
FBgn0085385	CG34356	bma	1.36006e-05	0.206787	0.399	0.3	0.0204008
FBgn0032666	CG5758	CG5758	1.43678e-05	0.262127	0.374	0.231	0.0215517
FBgn0261588	CG42698	pdm3	1.57512e-05	0.118646	0.304	0.261	0.0236268
FBgn0085370	CG34341	Pde11	1.74025e-05	0.081566	0.202	0.148	0.0261037
FBgn0024150	CG10564	Ac78C	1.86083e-05	0.0592041	0.104	0.065	0.0279124
FBgn0263773	CG43690	fok	2.03736e-05	0.219301	0.295	0.169	0.0305603
FBgn0259108	CG34387	futsch	2.13617e-05	1.55401	0.932	0.915	0.0320426
FBgn0040765	CG33473	luna	2.37389e-05	0.395301	0.448	0.303	0.0356084
FBgn0001234	CR31400	lncRNA:Hsromega	3.23695e-05	-0.00923384	0.995	0.994	0.0485542
FBgn0259677	CG42346	CG42346	3.5771e-05	0.0927927	0.181	0.131	0.0536564
FBgn0032629	CG15138	beat-IIIc	3.81693e-05	0.458483	0.477	0.344	0.0572539
FBgn0051092	CG31092	LpR2	3.94355e-05	0.0661685	0.179	0.12	0.0591532
FBgn0259216	CG42316	RhoGAP102A	4.37337e-05	-0.0318465	0.123	0.151	0.0656006
FBgn0035173	CG13907	CG13907	4.4971e-05	0.0245312	0.11	0.082	0.0674565
FBgn0004516	CG14994	Gad1	4.73147e-05	0.14546	0.128	0.052	0.070972
FBgn0031530	CG3254	Pgant2	5.04269e-05	0.135795	0.223	0.142	0.0756404
FBgn0263131	CG43373	CG43373	5.94373e-05	0.0420418	0.128	0.094	0.089156
FBgn0250869	CG42240	CG42240	6.27976e-05	0.0456519	0.128	0.089	0.0941965
FBgn0261285	CG5629	Ppcs	6.52282e-05	0.123055	0.273	0.202	0.0978423
FBgn0031016	CG12199	kek5	6.74288e-05	0.0660242	0.137	0.081	0.101143
FBgn0003499	CG7847	sr	6.83026e-05	0.13413	0.22	0.157	0.102454
FBgn0085420	CG34391	DIP-delta	8.1267e-05	0.1566	0.302	0.215	0.1219
FBgn0051721	CG31721	Trim9	8.46941e-05	0.0663525	0.147	0.093	0.127041
FBgn0033403	CG13739	CG13739	8.66213e-05	0.234319	0.347	0.23	0.129932
FBgn0025525	CG9102	bab2	8.99941e-05	0.105356	0.182	0.129	0.134991
FBgn0015777	CG9261	nrv2	0.000101249	0.0958584	0.198	0.119	0.151873
FBgn0000179	CG3578	bi	0.000110211	0.36479	0.297	0.2	0.165317
FBgn0065099	CR33925	snRNA:7SK	0.000114764	0.114351	0.891	0.839	0.172146
FBgn0040153	CG32597	l(1)G0469	0.000118313	0.0464804	0.127	0.087	0.177469
FBgn0259244	CG42342	CG42342	0.000121664	0.0639457	0.475	0.456	0.182497
FBgn0032797	CG10186	Hasp	0.000129032	0.285342	0.78	0.791	0.193547
FBgn0030158	CG9686	CG9686	0.000149543	0.0265725	0.115	0.09	0.224314
FBgn0051760	CG31760	CG31760	0.000159949	0.0845241	0.267	0.203	0.239923
FBgn0050463	CG30463	Pgant9	0.000165145	0.173386	0.327	0.237	0.247717
FBgn0001226	CG4466	Hsp27	0.000182358	0.0960386	0.158	0.106	0.273537
FBgn0034408	CG12758	sano	0.000195822	0.0595084	0.137	0.088	0.293733
FBgn0034753	CG2852	CG2852	0.000230937	0.0261743	0.451	0.456	0.346405
FBgn0285963	CG46339	CG46339	0.000234319	0.0468169	0.171	0.138	0.351479
FBgn0052698	CG32698	CARPB	0.000236721	0.20743	0.191	0.13	0.355082
FBgn0264975	CG1634	Nrg	0.000248816	0.0734455	0.287	0.23	0.373225
FBgn0259789	CG12701	zld	0.000256557	0.116215	0.2	0.141	0.384835
FBgn0000121	CG5962	Arr2	0.000306397	-0.0986987	0.119	0.17	0.459595
FBgn0052183	CG32183	Ccn	0.0003714	0.122495	0.204	0.127	0.5571
FBgn0261999	CG42817	Ca-Ma2d	0.000400455	0.108995	0.271	0.195	0.600683
FBgn0036801	CG6896	MYPT-75D	0.000411611	0.165269	0.332	0.247	0.617417
FBgn0031971	CG7224	Sirup	0.000420589	0.0577033	0.152	0.105	0.630883
FBgn0261090	CG42333	Sytbeta	0.000428264	0.0397409	0.228	0.201	0.642395
FBgn0034138	CG8332	RpS15	0.0004404	0.38526	0.81	0.799	0.6606
FBgn0020269	CG10145	mspo	0.000501574	0.155491	0.297	0.214	0.752361
FBgn0051619	CG31619	nolo	0.000529222	0.114799	0.311	0.24	0.793834
FBgn0004168	CG16720	5-HT1A	0.00055417	0.124092	0.317	0.258	0.831254
FBgn0031424	CG9887	VGlut	0.000599917	0.279946	0.206	0.143	0.899875
FBgn0052204	CG32204	CG32204	0.000648681	0.0778034	0.147	0.091	0.973022
FBgn0038063	CG33976	Octbeta2R	0.000660365	0.164213	0.399	0.335	0.990547
FBgn0030174	CG15312	CG15312	0.000740988	0.103287	0.251	0.176	1
FBgn0243512	CG7850	puc	0.00075034	0.0544454	0.159	0.116	1
FBgn0260943	CG32169	Rbp6	0.000779868	2.21977	0.869	0.846	1
FBgn0085409	CG34380	smal	0.000788144	0.160082	0.355	0.271	1
FBgn0287186	CG17594	scro	0.000802332	0.0828904	0.101	0.061	1
FBgn0000028	CG9151	acj6	0.000892816	0.393427	0.25	0.187	1
FBgn0264339	CG43795	CG43795	0.000892905	-0.00301662	0.223	0.208	1
FBgn0259212	CG42312	cno	0.0010229	0.0629585	0.152	0.096	1
FBgn0053516	CG33516	dpr3	0.00103606	0.0336289	0.163	0.128	1
FBgn0001224	CG4463	Hsp23	0.00105317	0.0609455	0.14	0.11	1
FBgn0053087	CG33087	LRP1	0.00107278	0.0597566	0.162	0.119	1
FBgn0030272	CG15201	CG15201	0.00110711	0.0959945	0.171	0.112	1
FBgn0003360	CG16944	sesB	0.00111908	0.432292	0.776	0.78	1
FBgn0085426	CG34397	Rgk3	0.00118896	0.0725363	0.152	0.104	1
FBgn0264386	CG15899	Ca-alpha1T	0.0012067	1.26646	0.742	0.643	1
FBgn0261046	CG31190	Dscam3	0.00121431	0.0804376	0.244	0.186	1
FBgn0038665	CG12269	euc	0.00121664	0.0444952	0.109	0.069	1
FBgn0004882	CG10868	orb	0.00122131	0.0610772	0.113	0.066	1
FBgn0260941	CG42318	app	0.00124311	0.120834	0.232	0.162	1
FBgn0000547	CG12676	ed	0.00129918	0.159346	0.307	0.236	1
FBgn0053517	CG33517	Dop2R	0.0013243	1.667	0.853	0.821	1
FBgn0011818	CG9884	oaf	0.00136758	0.0673813	0.181	0.137	1
FBgn0050361	CG30361	mtt	0.0014271	0.0462688	0.191	0.16	1
FBgn0040726	CG13439	dpr1	0.00146591	0.197841	0.339	0.247	1
FBgn0010453	CG4698	Wnt4	0.00148894	0.11421	0.114	0.073	1
FBgn0085387	CG34358	shakB	0.00151455	0.472873	0.611	0.545	1
FBgn0066101	CG31094	LpR1	0.00153919	0.11682	0.313	0.242	1
FBgn0040532	CG8369	CG8369	0.00155345	0.0734051	0.191	0.142	1
FBgn0261988	CG17998	Gprk2	0.00170618	0.32565	0.497	0.344	1
FBgn0262738	CG3620	norpA	0.0017544	0.26544	0.587	0.522	1
FBgn0004198	CG11387	ct	0.00181816	0.620424	0.292	0.143	1
FBgn0033368	CG13743	CG13743	0.00200417	0.0499992	0.236	0.205	1
FBgn0051163	CG31163	SKIP	0.0020342	0.411479	0.483	0.361	1
FBgn0262614	CG43140	pyd	0.00205953	0.224273	0.337	0.254	1
FBgn0001229	CG4190	Hsp67Bc	0.00210024	0.0668616	0.242	0.209	1
FBgn0033446	CG1648	CG1648	0.00221712	0.0335212	0.231	0.2	1
FBgn0036494	CG7250	Toll-6	0.00246937	0.499836	0.498	0.334	1
FBgn0261262	CG42613	CG42613	0.00253406	0.827467	0.693	0.531	1
FBgn0085395	CG34366	Shawl	0.0030482	0.0434109	0.184	0.145	1
FBgn0037015	CG13253	cmpy	0.00305237	0.16053	0.315	0.224	1
FBgn0015519	CG2302	nAChRalpha3	0.00324915	0.122279	0.316	0.24	1
FBgn0028369	CG3653	kirre	0.00330498	0.207531	0.388	0.286	1
FBgn0004369	CG11516	Ptp99A	0.00337657	0.750743	0.783	0.658	1
FBgn0004652	CG14307	fru	0.00341727	0.280479	0.294	0.183	1
FBgn0002023	CG10699	Lim3	0.00423229	0.0833868	0.126	0.087	1
FBgn0261509	CG14351	haf	0.0043938	0.101202	0.178	0.126	1
FBgn0030913	CG6123	CG6123	0.00446635	0.258338	0.384	0.3	1
FBgn0260003	CG34157	Dys	0.00449381	0.0505234	0.232	0.186	1
FBgn0263353	CG11000	CG11000	0.00456336	0.257831	0.548	0.476	1
FBgn0000064	CG6058	Ald1	0.00457772	0.351231	0.568	0.489	1
FBgn0265487	CG33197	mbl	0.00463736	0.781404	0.621	0.525	1
FBgn0259245	CG42343	DIP-beta	0.00479532	0.0585243	0.188	0.157	1
FBgn0051191	CG31191	CG31191	0.00507811	0.040725	0.132	0.102	1
FBgn0001233	CG1242	Hsp83	0.0052729	0.0209973	0.586	0.617	1
FBgn0031770	CG13995	CG13995	0.00532085	0.0845524	0.312	0.265	1
FBgn0000097	CG3166	aop	0.0053837	0.0811899	0.237	0.186	1
FBgn0267910	CR34335	lncRNA:CR34335	0.00554467	14.7326	0.99	0.926	1
FBgn0265194	CG44240	Trpm	0.00565495	0.0515718	0.178	0.136	1
FBgn0035041	CG13594	CG13594	0.00578984	0.0577474	0.166	0.119	1
FBgn0260657	CG42540	CG42540	0.0058262	0.474081	0.765	0.722	1
FBgn0261113	CG17836	Xrp1	0.00583242	0.0784404	0.272	0.214	1
FBgn0034286	CG33996	dpr13	0.00588588	0.436017	0.456	0.325	1
FBgn0267336	CG34360	Glut4EF	0.00683658	1.18006	0.824	0.761	1
FBgn0024963	CG7535	GluClalpha	0.00686031	0.867429	0.75	0.67	1
FBgn0262737	CG7437	mub	0.00690229	0.914984	0.786	0.741	1
FBgn0050419	CG30419	CG30419	0.00708202	0.0725086	0.208	0.163	1
FBgn0000422	CG10697	Ddc	0.00713907	-0.00135521	0.63	0.621	1
FBgn0051646	CG31646	DIP-theta	0.00717493	0.175795	0.238	0.174	1
FBgn0051814	CG31814	DIP-kappa	0.00718401	0.12737	0.221	0.164	1
FBgn0085397	CG34368	Fili	0.00739339	0.0674053	0.163	0.127	1
FBgn0012344	CG8348	Dh44	0.00752147	0.100137	0.113	0.082	1
FBgn0085434	CG34405	NaCP60E	0.00767892	0.788281	0.733	0.604	1
FBgn0031897	CG13784	CG13784	0.00787141	0.0569397	0.307	0.268	1
FBgn0003301	CG9533	rut	0.00809901	0.120514	0.283	0.208	1
FBgn0028645	CG7644	beat-Ib	0.00835994	0.0748788	0.323	0.28	1
FBgn0266100	CG44837	CG44837	0.00985364	0.0808093	0.18	0.125	1
FBgn0029761	CG10706	SK	0.00989538	0.588419	0.684	0.559	1
FBgn0034897	CG11299	Sesn	0.0101198	0.0409733	0.136	0.112	1
FBgn0261871	CG33507	dpr2	0.0107517	0.0416096	0.147	0.106	1
FBgn0085384	CG34355	CG34355	0.010921	0.145529	0.249	0.176	1
FBgn0021764	CG5227	sdk	0.0111039	0.0567746	0.11	0.072	1
FBgn0085407	CG34378	Pvf3	0.0116203	0.508211	0.558	0.432	1
FBgn0051361	CG31361	dpr17	0.011753	0.0878859	0.205	0.167	1
FBgn0085413	CG34384	CG34384	0.0120318	0.200675	0.37	0.279	1
FBgn0261549	CG42667	rdgA	0.0127511	0.362058	0.531	0.45	1
FBgn0004607	CG1449	zfh2	0.0128689	0.0885298	0.113	0.067	1
FBgn0036934	CG7395	sNPF-R	0.0131145	0.0264484	0.105	0.074	1
FBgn0262508	CG43078	CG43078	0.0132464	0.0288778	0.111	0.08	1
FBgn0085382	CG34353	CG34353	0.0134234	0.0582603	0.248	0.206	1
FBgn0013981	CG3379	His4r	0.0135666	0.599011	0.9	0.941	1
FBgn0264273	CG33960	Sema2b	0.0136382	0.182099	0.32	0.247	1
FBgn0024841	CG1963	Pcd	0.0147888	0.100506	0.273	0.201	1
FBgn0030505	CG11172	NFAT	0.0153511	0.224229	0.462	0.372	1
FBgn0032400	CG6770	CG6770	0.0154078	0.630425	0.707	0.605	1
FBgn0085391	CG34362	trv	0.0155424	1.52299	0.785	0.732	1
FBgn0261574	CG7749	kug	0.01615	0.0810658	0.221	0.169	1
FBgn0086359	CG3953	Invadolysin	0.0163048	0.0428665	0.177	0.14	1
FBgn0015774	CG10521	NetB	0.0166597	0.238149	0.355	0.269	1
FBgn0005775	CG7503	Con	0.0174262	1.23794	0.684	0.512	1
FBgn0029824	CG3726	CG3726	0.0177072	0.0869573	0.198	0.15	1
FBgn0052647	CG32647	CG32647	0.0195487	0.128198	0.281	0.19	1
FBgn0263220	CG43388	Hk	0.0205978	0.742658	0.766	0.673	1
FBgn0051324	CG31324	CG31324	0.0206626	0.110407	0.212	0.134	1
FBgn0001186	CG3001	Hex-A	0.0215725	1.2173	0.669	0.427	1
FBgn0259213	CG42313	side-II	0.0225748	0.131241	0.41	0.348	1
FBgn0000659	CG10002	fkh	0.0241349	0.107309	0.123	0.094	1
FBgn0083991	CG34155	CG34155	0.0251514	-0.0195992	0.108	0.12	1
FBgn0043364	CG4427	cbt	0.0254868	0.0315876	0.14	0.116	1
FBgn0011661	CG10701	Moe	0.026586	0.0215902	0.253	0.246	1
FBgn0085399	CG34370	CG34370	0.0266272	0.0258202	0.16	0.139	1
FBgn0030897	CG5744	Frq1	0.0268775	0.692878	0.624	0.471	1
FBgn0085383	CG34354	CG34354	0.0269731	0.205847	0.463	0.392	1
FBgn0085410	CG34381	TrissinR	0.0273524	0.0200125	0.114	0.093	1
FBgn0284243	CG9277	betaTub56D	0.0274636	0.175572	0.382	0.286	1
FBgn0261928	CG42795	CG42795	0.0276103	0.150856	0.342	0.245	1
FBgn0266756	CG44012	btsz	0.0277268	0.0791045	0.202	0.153	1
FBgn0085390	CG34361	Dgk	0.0279968	0.0265845	0.114	0.094	1
FBgn0250910	CG42244	Octbeta3R	0.0282398	0.053409	0.199	0.154	1
FBgn0032840	CG13968	sNPF	0.0296251	0.373596	0.215	0.17	1
FBgn0025682	CG9148	scf	0.0303724	0.0104347	0.103	0.094	1
FBgn0029897	CG3203	RpL17	0.0304224	0.182606	0.579	0.547	1
FBgn0027654	CG2239	jdp	0.0312169	1.07101	0.824	0.742	1
FBgn0003165	CG9755	pum	0.0324089	0.697153	0.856	0.826	1
FBgn0038321	CG6218	CG6218	0.0332759	0.00421496	0.103	0.09	1
FBgn0265052	CG44167	St3	0.0345352	0.0390762	0.173	0.142	1
FBgn0066084	CG30425	RpL41	0.034798	2.83607	0.859	0.721	1
FBgn0013733	CG18076	shot	0.0349773	0.0657174	0.371	0.324	1
FBgn0035756	CG32381	unc-13-4A	0.0351957	0.216533	0.432	0.357	1
FBgn0000535	CG10952	eag	0.0365534	0.127755	0.365	0.297	1
FBgn0041097	CG5423	robo3	0.03666	0.0342854	0.186	0.148	1
FBgn0004514	CG7485	Oct-TyrR	0.0370891	-0.00741177	0.141	0.143	1
FBgn0025885	CG11143	Inos	0.0390951	-0.0138879	0.091	0.11	1
FBgn0267337	CG42277	rn	0.0396872	0.0236107	0.108	0.089	1
FBgn0031306	CG4577	CG4577	0.0415052	0.1808	0.384	0.316	1
FBgn0010113	CG15532	hdc	0.04187	1.09515	0.799	0.703	1
FBgn0031374	CG7337	Wdr62	0.0430374	0.372119	0.542	0.391	1
FBgn0039349	CG4685	Ssadh	0.0450569	0.0262764	0.139	0.119	1
FBgn0033791	CG3915	Drl-2	0.0464113	0.053305	0.198	0.17	1
FBgn0052506	CG32506	CG32506	0.0464648	0.0890389	0.3	0.246	1
FBgn0032048	CG13094	Dh31	0.046741	-0.00583289	0.158	0.138	1
FBgn0265598	CG44425	Bx	0.0471872	0.107986	0.189	0.144	1
FBgn0262160	CG9932	CG9932	0.047225	0.0864891	0.236	0.184	1
FBgn0037941	CG12594	CG12594	0.0474628	0.107882	0.221	0.179	1
FBgn0000575	CG1007	emc	0.0486115	0.101299	0.367	0.321	1
FBgn0260658	CG42541	CG42541	0.0488977	0.389458	0.601	0.549	1
FBgn0036851	CG14082	CG14082	0.0493265	-0.0210401	0.113	0.13	1
FBgn0028370	CG4192	kek3	0.0507042	0.0858805	0.182	0.137	1
FBgn0011676	CG6713	Nos	0.0513398	0.0771192	0.143	0.108	1
FBgn0034636	CG10440	twz	0.0517002	-0.031386	0.135	0.138	1
FBgn0085432	CG34403	pan	0.0539702	0.399404	0.779	0.749	1
FBgn0028481	CG4341	CG4341	0.054154	-0.0321263	0.198	0.222	1
FBgn0033544	CG7220	CG7220	0.0541551	0.0242275	0.212	0.192	1
FBgn0261556	CG42674	CG42674	0.055299	0.108695	0.261	0.207	1
FBgn0039420	CG6154	CG6154	0.0573709	0.103107	0.211	0.16	1
FBgn0260660	CG42543	Mp	0.0584036	0.129989	0.405	0.357	1
FBgn0085412	CG34383	kmr	0.0585158	0.168483	0.341	0.245	1
FBgn0019985	CG11144	mGluR	0.0608636	0.169637	0.392	0.348	1
FBgn0265595	CG44422	CG44422	0.0615689	0.207767	0.382	0.287	1
FBgn0034725	CG6044	CG6044	0.0639596	-0.0367445	0.313	0.336	1
FBgn0262018	CG42829	CadN2	0.0641337	0.0655082	0.188	0.149	1
FBgn0011582	CG9652	Dop1R1	0.0647797	-0.0239326	0.276	0.283	1
FBgn0031632	CG15628	CG15628	0.0663569	0.125374	0.526	0.498	1
FBgn0265597	CG44424	rad	0.0667894	0.91271	0.732	0.639	1
FBgn0003380	CG12348	Sh	0.067449	2.01842	0.964	0.957	1
FBgn0004885	CG6863	tok	0.069742	0.0201007	0.143	0.129	1
FBgn0004858	CG4220	elB	0.0709248	0.0418862	0.223	0.198	1
FBgn0036927	CG7433	Gabat	0.0722428	-0.000483239	0.232	0.233	1
FBgn0004242	CG3139	Syt1	0.0725735	0.931872	0.869	0.871	1
FBgn0010434	CG11949	cora	0.0744706	0.0353741	0.2	0.174	1
FBgn0015609	CG7100	CadN	0.0745859	0.320717	0.626	0.568	1
FBgn0051221	CG31221	CG31221	0.0749557	8.51446	0.967	0.941	1
FBgn0085400	CG34371	side-V	0.0763558	0.0689986	0.254	0.197	1
FBgn0005677	CG4952	dac	0.0781245	0.0792563	0.109	0.081	1
FBgn0085419	CG34390	Rgk2	0.0783335	0.0687422	0.191	0.147	1
FBgn0264503	CG43902	CG43902	0.0786244	0.147936	0.331	0.268	1
FBgn0263995	CG43738	cpo	0.0786472	0.538004	0.79	0.78	1
FBgn0266801	CG45263	CG45263	0.0809445	0.170434	0.534	0.475	1
FBgn0261788	CG42734	Ank2	0.0817619	0.997177	0.847	0.786	1
FBgn0010473	CG15427	tutl	0.0833958	0.535468	0.722	0.636	1
FBgn0038641	CG7708	ChT	0.0837698	0.0448726	0.317	0.316	1
FBgn0263706	CG43658	CG43658	0.0846784	0.0661887	0.186	0.15	1
FBgn0031294	CG31795	IA-2	0.0852309	7.57193	0.997	0.995	1
FBgn0031736	CG11030	CG11030	0.0876869	0.0642053	0.446	0.439	1
FBgn0051708	CG31708	DIP-zeta	0.088401	0.070311	0.123	0.096	1
FBgn0033405	CG13954	CG13954	0.0889266	0.257993	0.371	0.268	1
FBgn0024944	CG3856	Oamb	0.0912098	0.0264925	0.121	0.1	1
FBgn0013688	CR34096	mt:srRNA	0.0924488	0.0622623	0.185	0.146	1
FBgn0031697	CG14024	CG14024	0.0941843	0.0162632	0.288	0.267	1
FBgn0023534	CG17778	CG17778	0.0960885	0.0449759	0.195	0.163	1
FBgn0002868	CG9470	MtnA	0.0977374	0.419919	0.384	0.203	1
FBgn0037153	CG12673	olf413	0.0990736	0.123176	0.4	0.34	1
FBgn0264606	CG43955	Fife	0.0991202	0.0113035	0.585	0.602	1
FBgn0004509	CG10772	Fur1	0.0997681	0.100778	0.246	0.185	1
FBgn0086677	CG30040	jeb	0.10152	0.833173	0.751	0.704	1
FBgn0259111	CG42253	Ndae1	0.10222	0.0544775	0.185	0.141	1
FBgn0261258	CG6014	rgn	0.102686	0.0776925	0.315	0.272	1
FBgn0264087	CG43756	Slob	0.104778	0.0312039	0.242	0.227	1
FBgn0032151	CG4128	nAChRalpha6	0.105478	1.82898	0.883	0.808	1
FBgn0000042	CG4027	Act5C	0.106227	0.406786	0.795	0.763	1
FBgn0019650	CG11186	toy	0.107802	0.0476542	0.244	0.214	1
FBgn0259170	CG42275	alpha-Man-Ia	0.11925	0.0643798	0.244	0.199	1
FBgn0024321	CG8524	NK7.1	0.120475	0.068046	0.229	0.202	1
FBgn0003435	CG9218	sm	0.123108	1.76165	0.935	0.921	1
FBgn0044328	CG32052	CG32052	0.124797	0.0819151	0.311	0.272	1
FBgn0014184	CG16747	Oda	0.125312	0.510289	0.697	0.664	1
FBgn0030412	CG17762	Tomosyn	0.126415	0.565337	0.685	0.576	1
FBgn0011666	CG5099	msi	0.127296	0.753153	0.623	0.424	1
FBgn0261698	CG42732	SLO2	0.128143	0.111461	0.332	0.282	1
FBgn0050158	CG30158	CG30158	0.132796	-0.0135836	0.109	0.122	1
FBgn0001225	CG4183	Hsp26	0.135127	0.071464	0.172	0.141	1
FBgn0011224	CG31000	heph	0.135631	2.51198	0.798	0.736	1
FBgn0031414	CG33955	eys	0.1368	0.261565	0.458	0.37	1
FBgn0005636	CG3385	nvy	0.13927	0.0390082	0.171	0.139	1
FBgn0028875	CG32975	nAChRalpha5	0.139583	0.684125	0.848	0.818	1
FBgn0264815	CG44007	Pde1c	0.140578	0.134123	0.412	0.344	1
FBgn0262636	CG2052	dati	0.146004	0.379126	0.661	0.608	1
FBgn0034978	CG3257	CG3257	0.149277	-0.0228609	0.176	0.2	1
FBgn0027608	CG2082	CG2082	0.151405	0.147887	0.366	0.303	1
FBgn0010415	CG10497	Sdc	0.151706	0.388319	0.688	0.608	1
FBgn0261555	CG42673	CG42673	0.152732	-0.0047864	0.104	0.108	1
FBgn0263994	CG43737	CG43737	0.152896	0.338644	0.587	0.485	1
FBgn0011828	CG12002	Pxn	0.153567	-0.0181785	0.094	0.106	1
FBgn0000037	CG4356	mAChR-A	0.161099	0.153923	0.486	0.434	1
FBgn0025360	CG18455	Optix	0.161656	0.0698391	0.128	0.12	1
FBgn0259243	CG42341	Pka-R1	0.163665	0.117149	0.392	0.342	1
FBgn0260793	CG42573	2mit	0.16657	0.0504636	0.256	0.212	1
FBgn0038282	CG33485	dpr9	0.17014	0.5298	0.64	0.535	1
FBgn0003274	CG4918	RpLP2	0.172084	0.173421	0.598	0.586	1
FBgn0039617	CG14521	DIP-gamma	0.173611	-0.0167571	0.196	0.202	1
FBgn0020907	CG14904	Scp2	0.175242	0.0709285	0.247	0.212	1
FBgn0010452	CG11280	trn	0.176229	0.129435	0.206	0.164	1
FBgn0285952	CG3186	eEF5	0.183332	0.074102	0.307	0.261	1
FBgn0001078	CG4059	ftz-f1	0.183571	0.127919	0.338	0.27	1
FBgn0037676	CG8861	CG8861	0.187029	0.00762283	0.294	0.281	1
FBgn0038494	CG4135	beat-IIb	0.192768	0.0233826	0.125	0.106	1
FBgn0261552	CG42670	ps	0.195277	0.981932	0.906	0.916	1
FBgn0000036	CG5610	nAChRalpha1	0.201579	0.234444	0.507	0.416	1
FBgn0004580	CG6702	Cbp53E	0.201603	1.8568	0.671	0.496	1
FBgn0263930	CG4974	dally	0.203561	0.222347	0.332	0.224	1
FBgn0052600	CG32600	dpr8	0.204143	0.269405	0.488	0.38	1
FBgn0266851	CR45312	lncRNA:CR45312	0.206586	0.0262127	0.21	0.185	1
FBgn0038980	CG6919	Octbeta1R	0.208391	0.0590163	0.17	0.13	1
FBgn0267668	CR46006	lncRNA:CR46006	0.210466	0.048862	0.137	0.104	1
FBgn0263873	CG43720	sick	0.21218	0.0327803	0.134	0.108	1
FBgn0004449	CG5723	Ten-m	0.214805	0.126715	0.414	0.354	1
FBgn0027356	CG8604	Amph	0.217366	0.043879	0.159	0.123	1
FBgn0028496	CG30116	CG30116	0.229264	0.259399	0.476	0.414	1
FBgn0267001	CG42338	Ten-a	0.233416	1.86572	0.902	0.831	1
FBgn0023179	CG6438	amon	0.234668	0.273731	0.499	0.389	1
FBgn0267033	CG45477	mamo	0.235303	0.782503	0.401	0.261	1
FBgn0262593	CG43128	Shab	0.237068	0.30616	0.546	0.455	1
FBgn0038246	CG14853	CG14853	0.237099	0.0387001	0.191	0.163	1
FBgn0264000	CG43743	GluRIB	0.241162	0.322833	0.434	0.324	1
FBgn0026160	CG7958	tna	0.24356	0.368781	0.504	0.387	1
FBgn0285944	CG9907	para	0.246027	1.05291	0.875	0.828	1
FBgn0264001	CG43744	bru3	0.247995	1.21431	0.849	0.84	1
FBgn0013973	CG1470	Gycbeta100B	0.24926	0.0363828	0.209	0.179	1
FBgn0261804	CG42750	CG42750	0.261905	0.210874	0.458	0.414	1
FBgn0036935	CG14186	CG14186	0.2625	0.0213577	0.178	0.155	1
FBgn0264895	CG44086	RapGAP1	0.263555	0.415134	0.531	0.442	1
FBgn0004880	CG1130	scrt	0.264915	0.776283	0.828	0.837	1
FBgn0266377	CG45019	Pde8	0.267581	0.00747729	0.18	0.168	1
FBgn0286778	CG46385	CG46385	0.273701	0.0977013	0.432	0.402	1
FBgn0039089	CG10152	beat-IV	0.274413	0.0186164	0.229	0.211	1
FBgn0264308	CG43778	CG43778	0.275404	0.146266	0.374	0.313	1
FBgn0038237	CG8279	Pde6	0.279413	0.392909	0.619	0.506	1
FBgn0037525	CG17816	CG17816	0.280294	0.296406	0.572	0.463	1
FBgn0025382	CG14791	Rab27	0.282456	-0.0178421	0.146	0.159	1
FBgn0013433	CG4846	beat-Ia	0.286407	0.0639117	0.238	0.193	1
FBgn0039064	CG4467	CG4467	0.288414	0.35158	0.663	0.591	1
FBgn0035499	CG14996	Chd64	0.288446	0.0360464	0.173	0.136	1
FBgn0037913	CG6783	fabp	0.292813	0.00594441	0.178	0.154	1
FBgn0029663	CG10804	CG10804	0.301322	0.166914	0.247	0.153	1
FBgn0027598	CG31012	cindr	0.306216	0.464026	0.534	0.39	1
FBgn0033438	CG1794	Mmp2	0.315	0.00768206	0.268	0.245	1
FBgn0026411	CG11354	Lim1	0.315986	0.390198	0.328	0.281	1
FBgn0000024	CG17907	Ace	0.317878	0.527752	0.691	0.637	1
FBgn0263392	CG43444	Tet	0.323207	0.256983	0.549	0.49	1
FBgn0083975	CG34139	Nlg4	0.328756	0.038072	0.24	0.203	1
FBgn0002643	CG8118	mam	0.332251	0.0728368	0.229	0.179	1
FBgn0038087	CG10134	beat-Va	0.33925	-0.0206117	0.149	0.158	1
FBgn0033484	CG2269	CG2269	0.340194	1.15729	0.799	0.77	1
FBgn0261649	CG31247	tinc	0.340631	0.0552581	0.191	0.16	1
FBgn0265182	CG44247	CG44247	0.344183	0.0589609	0.293	0.255	1
FBgn0013467	CG18285	igl	0.348862	0.264161	0.616	0.567	1
FBgn0010300	CG10719	brat	0.353106	0.224459	0.563	0.503	1
FBgn0010114	CG2040	hig	0.35653	0.430853	0.597	0.506	1
FBgn0052677	CG32677	X11Lbeta	0.359231	0.220563	0.456	0.367	1
FBgn0053202	CG33202	dpr11	0.359534	0.0758113	0.321	0.29	1
FBgn0265296	CG42256	Dscam2	0.362024	0.961777	0.84	0.792	1
FBgn0263219	CG42330	Dscam4	0.364103	0.0809341	0.258	0.215	1
FBgn0003326	CG17579	sca	0.368522	0.0358303	0.162	0.136	1
FBgn0039816	CG11317	CG11317	0.369165	0.0263608	0.193	0.179	1
FBgn0038084	CG14390	beat-Vc	0.373046	0.0218737	0.118	0.1	1
FBgn0037874	CG4800	Tctp	0.377769	0.00507685	0.348	0.343	1
FBgn0284245	CG8280	eEF1alpha1	0.38018	0.132813	0.326	0.239	1
FBgn0000303	CG12345	ChAT	0.390118	0.184499	0.559	0.515	1
FBgn0040397	CG3655	CG3655	0.396639	0.0392445	0.179	0.164	1
FBgn0262869	CG43224	Gfrl	0.397222	0.178327	0.478	0.422	1
FBgn0083963	CG34127	Nlg3	0.398791	0.192276	0.572	0.544	1
FBgn0039209	CG13624	REPTOR	0.398859	0.0905239	0.302	0.259	1
FBgn0261089	CG5559	Sytalpha	0.399039	0.0280657	0.185	0.16	1
FBgn0029123	CG18024	SoxN	0.400048	0.238509	0.239	0.16	1
FBgn0027589	CG1688	CG1688	0.402887	0.0640875	0.191	0.16	1
FBgn0038498	CG14334	beat-IIa	0.404958	0.235984	0.357	0.269	1
FBgn0264794	CR44024	lncRNA:CR44024	0.407689	0.102052	0.423	0.383	1
FBgn0031835	CG11319	CG11319	0.408695	0.129782	0.461	0.417	1
FBgn0085421	CG34392	Epac	0.415058	0.104645	0.343	0.302	1
FBgn0001085	CG17697	fz	0.416805	0.0754024	0.207	0.163	1
FBgn0083949	CG34113	side-III	0.427469	0.418184	0.531	0.419	1
FBgn0086778	CG32538	nAChRalpha7	0.429124	0.379993	0.565	0.468	1
FBgn0041605	CG32490	cpx	0.429913	0.913671	0.915	0.887	1
FBgn0085753	CR40596	28SrRNA-Psi:CR40596	0.44091	-0.000831651	0.187	0.187	1
FBgn0026428	CG6170	HDAC6	0.442325	0.020785	0.114	0.098	1
FBgn0039380	CG5890	CG5890	0.442752	0.054126	0.279	0.248	1
FBgn0270928	CG32848	VAChT	0.446042	0.216096	0.713	0.688	1
FBgn0261244	CG33174	inaE	0.447354	0.267375	0.428	0.309	1
FBgn0053543	CG33543	CG33543	0.450888	0.352435	0.434	0.351	1
FBgn0262509	CG43079	nrm	0.452107	0.0572201	0.32	0.286	1
FBgn0015229	CG6575	glec	0.45252	0.393054	0.396	0.222	1
FBgn0264006	CG43749	dysc	0.46009	0.557331	0.815	0.786	1
FBgn0027339	CG11352	jim	0.460942	2.1581	0.978	0.993	1
FBgn0028644	CG4838	beat-Ic	0.470298	0.497871	0.457	0.319	1
FBgn0032901	CG9339	sky	0.471361	0.137997	0.428	0.37	1
FBgn0011656	CG1429	Mef2	0.475106	0.119069	0.301	0.247	1
FBgn0004244	CG10537	Rdl	0.477113	1.62209	0.96	0.959	1
FBgn0017590	CG6669	klg	0.482909	0.244001	0.574	0.533	1
FBgn0033108	CG15236	CG15236	0.495194	0.137661	0.392	0.349	1
FBgn0028888	CG4168	CG4168	0.495744	0.00335873	0.155	0.152	1
FBgn0019643	CG3318	AANAT1	0.514816	0.00565207	0.138	0.14	1
FBgn0015399	CG12283	kek1	0.521761	0.214124	0.481	0.444	1
FBgn0267253	CG32700	CG32700	0.521951	0.273275	0.426	0.346	1
FBgn0039647	CG14509	jus	0.524137	0.265379	0.476	0.395	1
FBgn0014163	CG4609	fax	0.536684	1.13861	0.797	0.692	1
FBgn0250908	CG42242	beat-VII	0.538299	0.211298	0.452	0.427	1
FBgn0052432	CG32432	CG32432	0.542151	0.0305714	0.215	0.189	1
FBgn0033358	CG8216	spab	0.550602	0.161077	0.417	0.392	1
FBgn0035032	CG4692	ATPsynF	0.551311	0.376924	0.657	0.629	1
FBgn0002593	CG4087	RpLP1	0.552311	0.28468	0.646	0.63	1
FBgn0030723	CG14948	dpr18	0.554906	0.0296225	0.158	0.138	1
FBgn0032833	CG10664	COX4	0.558632	0.252025	0.675	0.657	1
FBgn0052406	CG32406	PVRAP	0.558965	0.0251637	0.131	0.115	1
FBgn0263397	CG8585	Ih	0.56339	1.43561	0.83	0.781	1
FBgn0262782	CG5362	Mdh1	0.568138	0.00640434	0.114	0.11	1
FBgn0003423	CG1417	slgA	0.571964	0.200467	0.432	0.328	1
FBgn0051665	CG31665	wry	0.572049	0.389522	0.51	0.399	1
FBgn0013686	CR34094	mt:lrRNA	0.575228	-0.372825	0.934	0.944	1
FBgn0263289	CG43398	scrib	0.576789	0.0243195	0.191	0.173	1
FBgn0003091	CG6622	Pkc53E	0.584098	0.792727	0.669	0.579	1
FBgn0000114	CG31762	bru1	0.584981	0.0171307	0.105	0.089	1
FBgn0028704	CG18660	Nckx30C	0.587201	0.323393	0.716	0.703	1
FBgn0030574	CG9413	sbm	0.591065	0.0341172	0.159	0.133	1
FBgn0052206	CG32206	CG32206	0.592071	0.0433517	0.312	0.297	1
FBgn0266871	CR45332	lncRNA:CR45332	0.612749	-0.0123469	0.128	0.132	1
FBgn0010411	CG8900	RpS18	0.614975	0.13029	0.766	0.826	1
FBgn0036043	CG8177	CG8177	0.635991	0.159402	0.431	0.371	1
FBgn0000635	CG3665	Fas2	0.637687	0.361256	0.351	0.262	1
FBgn0267252	CG3694	Ggamma30A	0.637789	2.16327	0.95	0.922	1
FBgn0052264	CG32264	CG32264	0.642215	0.705456	0.746	0.683	1
FBgn0264908	CG44099	pHCl-1	0.643925	0.0432918	0.322	0.296	1
FBgn0013576	CG32464	mtd	0.645977	0.665092	0.79	0.733	1
FBgn0085447	CG34418	sif	0.648226	1.24046	0.705	0.502	1
FBgn0039584	CG14064	beat-VI	0.651998	0.0768559	0.296	0.268	1
FBgn0016061	CG31062	side	0.660282	0.214861	0.49	0.446	1
FBgn0259821	CG42402	CG42402	0.662291	0.156573	0.468	0.437	1
FBgn0034731	CG10384	CG10384	0.662449	0.0360029	0.247	0.224	1
FBgn0041707	CG1168	7B2	0.663664	0.366245	0.815	0.779	1
FBgn0001091	CG12055	Gapdh1	0.665989	0.075815	0.305	0.261	1
FBgn0083950	CG34114	side-VI	0.66713	0.403042	0.515	0.401	1
FBgn0000116	CG32031	Argk	0.674013	0.187718	0.626	0.636	1
FBgn0037956	CG6959	CG6959	0.675059	0.0209211	0.111	0.092	1
FBgn0260442	CG6831	rhea	0.677165	0.0359544	0.174	0.157	1
FBgn0261597	CG10305	RpS26	0.681062	0.183729	0.703	0.754	1
FBgn0005771	CG4491	noc	0.681863	0.030543	0.143	0.125	1
FBgn0039054	CG13830	Cow	0.684256	0.198823	0.534	0.463	1
FBgn0035816	CG13685	CG13685	0.687113	0.0298909	0.206	0.189	1
FBgn0036144	CG6207	GlcAT-P	0.714354	0.0615062	0.259	0.226	1
FBgn0050089	CG30089	CG30089	0.718943	-0.010882	0.114	0.124	1
FBgn0040823	CG14162	dpr6	0.722904	0.104653	0.305	0.26	1
FBgn0003429	CG10693	slo	0.727124	0.5141	0.743	0.683	1
FBgn0260462	CG12163	CG12163	0.730256	0.0243113	0.159	0.139	1
FBgn0266418	CG45058	wake	0.730648	0.0153899	0.151	0.141	1
FBgn0265002	CG44153	CG44153	0.730926	-0.00394908	0.233	0.233	1
FBgn0038826	CG17838	Syp	0.731688	0.344551	0.572	0.455	1
FBgn0086680	CG10037	vvl	0.734543	0.184565	0.191	0.163	1
FBgn0024189	CG33141	sns	0.740433	0.016955	0.171	0.16	1
FBgn0033192	CG2105	Corin	0.750828	0.155215	0.317	0.24	1
FBgn0259234	CG42332	Camta	0.754139	0.0433032	0.239	0.221	1
FBgn0263257	CG43395	Cngl	0.758132	0.967095	0.739	0.641	1
FBgn0022382	CG15862	Pka-R2	0.76073	0.177413	0.452	0.363	1
FBgn0010263	CG3151	Rbp9	0.766648	0.359077	0.649	0.592	1
FBgn0010313	CG2530	corto	0.76734	0.154195	0.406	0.341	1
FBgn0000633	CG17716	CG17716	0.77736	0.515294	0.505	0.39	1
FBgn0038156	CG14372	side-IV	0.779901	0.0186038	0.13	0.123	1
FBgn0041094	CG7590	scyl	0.78018	0.290978	0.486	0.389	1
FBgn0030090	CG12664	fend	0.785411	0.296238	0.551	0.482	1
FBgn0259171	CG42276	Pde9	0.791699	0.381327	0.626	0.586	1
FBgn0000273	CG4379	Pka-C1	0.796184	0.382775	0.616	0.547	1
FBgn0264574	CG43946	Glut1	0.800577	0.0212669	0.393	0.38	1
FBgn0259242	CG42340	CG42340	0.805524	0.0452405	0.255	0.237	1
FBgn0053147	CG33147	Hs3st-A	0.80556	0.492531	0.687	0.667	1
FBgn0035171	CG12502	CG12502	0.818429	0.0178194	0.159	0.142	1
FBgn0086758	CG31666	chinmo	0.830656	0.481313	0.787	0.775	1
FBgn0042696	CG2380	NfI	0.837359	0.0569914	0.24	0.202	1
FBgn0038839	CG10830	Ktl	0.850431	0.0569643	0.373	0.342	1
FBgn0036165	CG7533	chrb	0.854085	0.599548	0.723	0.674	1
FBgn0053179	CG33179	beat-IIIb	0.858488	0.0418509	0.324	0.315	1
FBgn0010412	CG4464	RpS19a	0.859412	0.0716209	0.347	0.325	1
FBgn0001235	CG17117	hth	0.860183	0.518614	0.548	0.441	1
FBgn0052062	CG32062	Rbfox1	0.884669	1.40883	0.857	0.806	1
FBgn0285948	CG15442	RpL27A	0.888287	-0.00767513	0.629	0.71	1
FBgn0036454	CG17839	CG17839	0.89103	0.0305512	0.163	0.151	1
FBgn0029814	CG15765	CG15765	0.910323	0.334966	0.546	0.464	1
FBgn0261836	CG42768	Msp300	0.911474	1.34152	0.848	0.808	1
FBgn0051774	CG31774	fred	0.913169	0.0333095	0.266	0.261	1
FBgn0000108	CG7727	Appl	0.914852	1.05315	0.883	0.875	1
FBgn0052017	CG32017	CG32017	0.925696	0.147687	0.419	0.357	1
FBgn0023095	CG11282	caps	0.940599	0.0230827	0.177	0.169	1
FBgn0039346	CG5079	CG5079	0.949056	0.0149937	0.147	0.137	1
FBgn0085414	CG34385	dpr12	0.951656	0.108116	0.467	0.434	1
FBgn0263980	CG43729	Stacl	0.951794	0.385311	0.694	0.632	1
FBgn0035170	CG12191	dpr20	0.958324	0.00931008	0.109	0.103	1
FBgn0053143	CG33143	CG33143	0.969152	0.0452412	0.357	0.335	1
FBgn0033250	CG14762	CG14762	0.974525	0.321283	0.698	0.657	1
FBgn0036844	CG14080	Mkp3	0.975113	0.371263	0.554	0.44	1
FBgn0264490	CG18389	Eip93F	0.975589	0.321308	0.345	0.265	1
FBgn0037521	CG2993	CG2993	0.983993	0.106875	0.431	0.395	1
FBgn0038653	CG18208	Octalpha2R	0.987652	0.104874	0.362	0.335	1
FBgn0004611	CG4574	Plc21C	0.987779	0.236426	0.558	0.503	1
FBgn0013954	CG11001	Fkbp12	0.991536	0.14122	0.503	0.464	1
FBgn0267579	CR45919	lncRNA:CR45919	0.992437	0.0227223	0.15	0.139	1

## Sheet: Male_C6
FlyBaseID	GeneID	Gene symbol	p_val	avg_diff	pct.1	pct.2	p_val_adj
FBgn0019660	CR32665	lncRNA:roX2	0	-3.3286	0.011	0.902	0
FBgn0004047	CG11129	Yp3	9.60195e-85	0.179875	0.153	0.001	1.44029e-81
FBgn0051690	CG31690	CG31690	1.39466e-38	0.345671	0.345	0.152	2.09199e-35
FBgn0052626	CG32626	AMPdeam	6.68278e-28	0.112819	0.2	0.114	1.00242e-24
FBgn0087002	CG11064	apolpp	2.72361e-27	0.107422	0.158	0.068	4.08541e-24
FBgn0260429	CG42524	CG42524	1.47767e-26	0.161669	0.205	0.093	2.21651e-23
FBgn0267519	CR45859	28SrRNA-Psi:CR45859	2.59083e-25	-0.0559953	0.066	0.114	3.88624e-22
FBgn0004619	CG8442	GluRIA	4.73601e-25	0.329845	0.353	0.19	7.10401e-22
FBgn0262636	CG2052	dati	1.07832e-23	0.275068	0.2	0.063	1.61748e-20
FBgn0002940	CG4550	ninaE	1.80585e-23	-0.295364	0.129	0.289	2.70878e-20
FBgn0002945	CG11614	nkd	6.40647e-22	0.383508	0.395	0.214	9.6097e-19
FBgn0260971	CG42594	CG42594	3.22488e-21	0.341753	0.317	0.161	4.83733e-18
FBgn0058469	CR40469	lncRNA:CR40469	1.25856e-20	0.0945938	0.138	0.064	1.88783e-17
FBgn0015766	CG10596	Msr-110	1.79845e-20	0.095011	0.142	0.053	2.69768e-17
FBgn0264090	CG43759	CG43759	1.89893e-20	0.180234	0.245	0.142	2.8484e-17
FBgn0031299	CG4629	CG4629	2.29016e-20	0.0935045	0.208	0.122	3.43525e-17
FBgn0052057	CG32057	dpr10	2.59973e-19	0.230345	0.297	0.172	3.89959e-16
FBgn0052982	CG32982	CG32982	1.36139e-18	0.215151	0.236	0.118	2.04208e-15
FBgn0285926	CG1691	Imp	2.77624e-18	0.353252	0.177	0.046	4.16435e-15
FBgn0036821	CG3961	CG3961	6.00705e-18	0.0555842	0.109	0.063	9.01057e-15
FBgn0283651	CG46301	CG46301	6.54237e-18	0.177887	0.2	0.082	9.81356e-15
FBgn0260941	CG42318	app	6.78481e-18	0.148573	0.235	0.126	1.01772e-14
FBgn0037963	CG6977	Cad87A	1.22507e-17	0.098248	0.113	0.045	1.8376e-14
FBgn0052066	CG32066	CG32066	2.58539e-17	0.122659	0.187	0.096	3.87808e-14
FBgn0035050	CG4871	SiaT	4.58718e-17	0.155449	0.152	0.057	6.88077e-14
FBgn0085426	CG34397	Rgk3	4.62028e-17	0.114424	0.166	0.083	6.93042e-14
FBgn0265595	CG44422	CG44422	5.9612e-17	0.348822	0.391	0.219	8.9418e-14
FBgn0013995	CG5685	Calx	6.07226e-17	0.287353	0.323	0.173	9.10839e-14
FBgn0250867	CG42238	CG42238	6.45532e-17	0.182766	0.269	0.158	9.68298e-14
FBgn0002543	CG5481	robo2	3.78436e-16	0.118308	0.111	0.036	5.67654e-13
FBgn0019662	CG8593	qm	2.04103e-15	0.0812224	0.182	0.12	3.06155e-12
FBgn0040532	CG8369	CG8369	3.03401e-15	0.205106	0.237	0.12	4.55101e-12
FBgn0031738	CG9171	CG9171	4.1433e-15	0.0931302	0.16	0.088	6.21496e-12
FBgn0085384	CG34355	CG34355	7.1638e-15	0.161598	0.195	0.084	1.07457e-11
FBgn0087012	CG1056	5-HT2A	7.82331e-15	0.166157	0.162	0.064	1.1735e-11
FBgn0020621	CG2049	Pkn	1.00005e-14	0.0983769	0.14	0.056	1.50007e-11
FBgn0264794	CR44024	lncRNA:CR44024	1.26946e-14	0.101602	0.138	0.053	1.90419e-11
FBgn0264753	CG44011	Rgk1	2.03118e-14	0.16339	0.194	0.087	3.04677e-11
FBgn0086604	CG12484	side-VIII	2.4943e-14	0.174896	0.229	0.122	3.74145e-11
FBgn0285963	CG46339	CG46339	2.59002e-14	0.0759419	0.177	0.111	3.88503e-11
FBgn0085420	CG34391	DIP-delta	3.14368e-14	0.152593	0.169	0.081	4.71552e-11
FBgn0032666	CG5758	CG5758	3.17968e-14	0.251233	0.296	0.159	4.76953e-11
FBgn0283499	CG18402	InR	3.45663e-14	0.105317	0.221	0.128	5.18495e-11
FBgn0030272	CG15201	CG15201	3.71784e-14	0.159113	0.192	0.094	5.57676e-11
FBgn0262473	CG5490	Tl	5.35738e-14	0.141685	0.19	0.088	8.03607e-11
FBgn0261260	CG42611	mgl	5.37823e-14	0.0917679	0.145	0.072	8.06735e-11
FBgn0263773	CG43690	fok	5.95141e-14	0.236871	0.311	0.17	8.92711e-11
FBgn0029768	CG16752	SPR	6.92159e-14	0.233413	0.239	0.12	1.03824e-10
FBgn0083228	CG5907	Frq2	1.1628e-13	0.473665	0.464	0.31	1.7442e-10
FBgn0040765	CG33473	luna	1.21095e-13	0.352056	0.404	0.256	1.81642e-10
FBgn0000659	CG10002	fkh	1.40039e-13	0.304547	0.195	0.092	2.10058e-10
FBgn0013718	CG33991	nuf	1.49361e-13	0.0609996	0.127	0.07	2.24041e-10
FBgn0030158	CG9686	CG9686	1.59846e-13	0.106054	0.147	0.069	2.39769e-10
FBgn0032629	CG15138	beat-IIIc	3.33317e-13	0.312988	0.354	0.219	4.99975e-10
FBgn0031971	CG7224	Sirup	3.3455e-13	0.0540562	0.128	0.08	5.01826e-10
FBgn0004652	CG14307	fru	4.11676e-13	0.521162	0.373	0.19	6.17514e-10
FBgn0026411	CG11354	Lim1	5.26434e-13	0.225169	0.133	0.041	7.89652e-10
FBgn0004573	CG12073	5-HT7	5.87006e-13	0.0816949	0.112	0.046	8.80509e-10
FBgn0004168	CG16720	5-HT1A	7.40329e-13	0.0945907	0.286	0.229	1.11049e-09
FBgn0035495	CG14989	CG14989	9.15766e-13	1.25935	0.461	0.391	1.37365e-09
FBgn0000028	CG9151	acj6	1.14132e-12	0.393351	0.197	0.093	1.71198e-09
FBgn0033987	CG12424	ckn	1.16019e-12	0.134294	0.232	0.144	1.74029e-09
FBgn0036801	CG6896	MYPT-75D	1.70718e-12	0.183011	0.279	0.178	2.56077e-09
FBgn0053087	CG33087	LRP1	4.07098e-12	0.0754142	0.148	0.083	6.10648e-09
FBgn0261588	CG42698	pdm3	6.02742e-12	0.175359	0.2	0.108	9.04113e-09
FBgn0004395	CG4620	unk	6.97862e-12	0.0984782	0.24	0.166	1.04679e-08
FBgn0264442	CG43860	ab	7.88356e-12	0.15822	0.2	0.101	1.18253e-08
FBgn0002023	CG10699	Lim3	7.98304e-12	0.110665	0.129	0.055	1.19746e-08
FBgn0263219	CG42330	Dscam4	1.18865e-11	0.177559	0.314	0.2	1.78298e-08
FBgn0003499	CG7847	sr	1.28653e-11	0.128685	0.165	0.08	1.9298e-08
FBgn0036789	CG13702	AstC-R2	1.43556e-11	0.189568	0.222	0.137	2.15333e-08
FBgn0261988	CG17998	Gprk2	1.58374e-11	0.35988	0.462	0.307	2.37561e-08
FBgn0052683	CG32683	CG32683	2.21958e-11	0.128133	0.204	0.117	3.32937e-08
FBgn0051324	CG31324	CG31324	3.3542e-11	0.315292	0.395	0.256	5.0313e-08
FBgn0011693	CG4899	Pdh	3.36357e-11	-0.169937	0.045	0.113	5.04535e-08
FBgn0028369	CG3653	kirre	4.9661e-11	0.158254	0.371	0.262	7.44915e-08
FBgn0259677	CG42346	CG42346	7.14365e-11	0.0975761	0.178	0.104	1.07155e-07
FBgn0086680	CG10037	vvl	1.19788e-10	0.326718	0.145	0.063	1.79682e-07
FBgn0261999	CG42817	Ca-Ma2d	1.20103e-10	0.124015	0.197	0.108	1.80155e-07
FBgn0262614	CG43140	pyd	1.28291e-10	0.129651	0.225	0.146	1.92437e-07
FBgn0031530	CG3254	Pgant2	1.38425e-10	0.107879	0.174	0.108	2.07637e-07
FBgn0015229	CG6575	glec	1.8797e-10	0.541047	0.475	0.288	2.81954e-07
FBgn0015777	CG9261	nrv2	1.96752e-10	0.0510524	0.191	0.137	2.95128e-07
FBgn0263706	CG43658	CG43658	2.25691e-10	-0.00154639	0.202	0.186	3.38537e-07
FBgn0020269	CG10145	mspo	2.41927e-10	0.193443	0.293	0.188	3.6289e-07
FBgn0001090	CG7088	bnb	2.66302e-10	0.0653412	0.109	0.051	3.99454e-07
FBgn0011818	CG9884	oaf	3.05259e-10	0.101372	0.155	0.085	4.57888e-07
FBgn0037153	CG12673	olf413	3.1162e-10	0.10718	0.317	0.241	4.6743e-07
FBgn0267322	CR45758	lncRNA:CR45758	3.40887e-10	0.104136	0.225	0.154	5.1133e-07
FBgn0033268	CG2297	Obp44a	3.56691e-10	0.492464	0.32	0.188	5.35037e-07
FBgn0024321	CG8524	NK7.1	5.11924e-10	0.108659	0.241	0.164	7.67886e-07
FBgn0050463	CG30463	Pgant9	5.42096e-10	0.16991	0.321	0.227	8.13143e-07
FBgn0261871	CG33507	dpr2	6.65452e-10	0.0817685	0.183	0.111	9.98177e-07
FBgn0031770	CG13995	CG13995	7.40628e-10	0.127651	0.212	0.119	1.11094e-06
FBgn0261046	CG31190	Dscam3	1.29815e-09	0.0893471	0.152	0.083	1.94722e-06
FBgn0259213	CG42313	side-II	1.79831e-09	-0.0929584	0.419	0.394	2.69747e-06
FBgn0000547	CG12676	ed	2.29925e-09	0.137279	0.296	0.227	3.44888e-06
FBgn0261698	CG42732	SLO2	3.13869e-09	0.179378	0.342	0.239	4.70804e-06
FBgn0086359	CG3953	Invadolysin	3.69297e-09	0.0515126	0.132	0.084	5.53945e-06
FBgn0031424	CG9887	VGlut	4.80304e-09	0.646745	0.281	0.178	7.20455e-06
FBgn0033159	CG17800	Dscam1	7.60648e-09	0.0760647	0.181	0.125	1.14097e-05
FBgn0004595	CG17228	pros	8.85463e-09	6.98747	0.956	0.926	1.32819e-05
FBgn0033791	CG3915	Drl-2	9.25807e-09	0.0711095	0.119	0.055	1.38871e-05
FBgn0085397	CG34368	Fili	9.60346e-09	0.083002	0.169	0.113	1.44052e-05
FBgn0030505	CG11172	NFAT	1.12561e-08	0.159754	0.334	0.228	1.68841e-05
FBgn0051163	CG31163	SKIP	1.13608e-08	0.336733	0.377	0.243	1.70412e-05
FBgn0039420	CG6154	CG6154	1.14289e-08	0.111392	0.168	0.092	1.71434e-05
FBgn0262160	CG9932	CG9932	1.91367e-08	0.21806	0.324	0.211	2.8705e-05
FBgn0011661	CG10701	Moe	2.56577e-08	0.0690446	0.198	0.141	3.84865e-05
FBgn0266756	CG44012	btsz	2.60723e-08	0.0432898	0.104	0.056	3.91085e-05
FBgn0038542	CG7431	TyrR	4.05688e-08	0.0767243	0.12	0.075	6.08532e-05
FBgn0004607	CG1449	zfh2	4.09457e-08	0.119486	0.146	0.089	6.14186e-05
FBgn0033405	CG13954	CG13954	4.70602e-08	0.227887	0.333	0.228	7.05903e-05
FBgn0003301	CG9533	rut	6.71698e-08	0.0984966	0.224	0.164	0.000100755
FBgn0052521	CG32521	CG32521	7.07415e-08	0.0387304	0.121	0.09	0.000106112
FBgn0024841	CG1963	Pcd	7.87791e-08	0.0630369	0.15	0.101	0.000118169
FBgn0004910	CG15855	Eip63F-1	8.10956e-08	0.0938298	0.142	0.07	0.000121643
FBgn0031897	CG13784	CG13784	8.61272e-08	0.0827442	0.307	0.244	0.000129191
FBgn0260442	CG6831	rhea	9.49199e-08	0.0630554	0.139	0.078	0.00014238
FBgn0050361	CG30361	mtt	1.13026e-07	0.0936886	0.132	0.073	0.00016954
FBgn0011656	CG1429	Mef2	1.38313e-07	0.116022	0.284	0.216	0.000207469
FBgn0039209	CG13624	REPTOR	1.49418e-07	0.0932714	0.298	0.234	0.000224127
FBgn0052677	CG32677	X11Lbeta	1.73925e-07	0.10965	0.385	0.3	0.000260888
FBgn0010434	CG11949	cora	2.01454e-07	0.0366746	0.125	0.089	0.000302181
FBgn0013733	CG18076	shot	2.08436e-07	0.131158	0.344	0.249	0.000312655
FBgn0014859	CG1864	Hr38	2.36064e-07	0.14117	0.263	0.182	0.000354096
FBgn0052406	CG32406	PVRAP	2.68926e-07	0.0596251	0.124	0.069	0.000403389
FBgn0263930	CG4974	dally	2.80885e-07	0.261141	0.337	0.216	0.000421328
FBgn0038641	CG7708	ChT	2.96953e-07	0.0674767	0.184	0.125	0.00044543
FBgn0264975	CG1634	Nrg	3.51489e-07	0.0478031	0.198	0.164	0.000527233
FBgn0031306	CG4577	CG4577	4.27447e-07	0.142762	0.242	0.153	0.00064117
FBgn0030574	CG9413	sbm	6.00124e-07	0.0728645	0.161	0.098	0.000900186
FBgn0051092	CG31092	LpR2	6.03497e-07	0.0397061	0.118	0.078	0.000905246
FBgn0033544	CG7220	CG7220	6.52241e-07	0.054946	0.212	0.162	0.000978361
FBgn0013467	CG18285	igl	6.90898e-07	0.585957	0.614	0.465	0.00103635
FBgn0085370	CG34341	Pde11	1.24069e-06	0.0415562	0.112	0.075	0.00186104
FBgn0000097	CG3166	aop	1.30927e-06	0.123414	0.241	0.164	0.0019639
FBgn0262782	CG5362	Mdh1	1.39846e-06	0.0483984	0.154	0.118	0.00209769
FBgn0085412	CG34383	kmr	1.49907e-06	0.214218	0.341	0.231	0.0022486
FBgn0264273	CG33960	Sema2b	1.50461e-06	0.114086	0.205	0.144	0.00225691
FBgn0033368	CG13743	CG13743	1.51067e-06	0.0712077	0.164	0.105	0.00226601
FBgn0266100	CG44837	CG44837	2.10356e-06	0.0367912	0.151	0.113	0.00315533
FBgn0261556	CG42674	CG42674	2.16989e-06	0.209892	0.246	0.144	0.00325484
FBgn0028370	CG4192	kek3	2.57626e-06	0.118281	0.222	0.153	0.0038644
FBgn0037015	CG13253	cmpy	2.77744e-06	0.114976	0.287	0.226	0.00416615
FBgn0040153	CG32597	l(1)G0469	3.02543e-06	0.0487052	0.119	0.076	0.00453814
FBgn0031016	CG12199	kek5	3.04452e-06	0.0537862	0.117	0.076	0.00456678
FBgn0243512	CG7850	puc	3.26057e-06	0.0176424	0.111	0.088	0.00489086
FBgn0030174	CG15312	CG15312	3.27571e-06	0.0604903	0.226	0.181	0.00491357
FBgn0044328	CG32052	CG32052	3.36775e-06	0.110303	0.224	0.157	0.00505162
FBgn0052017	CG32017	CG32017	3.62037e-06	0.146929	0.424	0.37	0.00543056
FBgn0042696	CG2380	NfI	3.76083e-06	0.096809	0.262	0.197	0.00564125
FBgn0261285	CG5629	Ppcs	3.82207e-06	0.0702596	0.201	0.157	0.0057331
FBgn0011224	CG31000	heph	4.4988e-06	1.23242	0.637	0.508	0.0067482
FBgn0000121	CG5962	Arr2	5.01714e-06	-0.124764	0.146	0.211	0.00752571
FBgn0051814	CG31814	DIP-kappa	5.50172e-06	0.19143	0.191	0.129	0.00825258
FBgn0035756	CG32381	unc-13-4A	5.5404e-06	0.165071	0.268	0.182	0.00831059
FBgn0019985	CG11144	mGluR	6.19514e-06	0.147683	0.278	0.192	0.00929272
FBgn0043364	CG4427	cbt	7.0416e-06	0.0469901	0.114	0.069	0.0105624
FBgn0032151	CG4128	nAChRalpha6	7.10274e-06	2.13235	0.798	0.649	0.0106541
FBgn0004885	CG6863	tok	7.33674e-06	0.0307714	0.11	0.08	0.0110051
FBgn0035041	CG13594	CG13594	7.51233e-06	0.0595422	0.136	0.091	0.0112685
FBgn0031374	CG7337	Wdr62	7.57813e-06	0.48955	0.55	0.396	0.0113672
FBgn0261509	CG14351	haf	7.94363e-06	0.133698	0.215	0.164	0.0119154
FBgn0264000	CG43743	GluRIB	8.07205e-06	0.43079	0.453	0.293	0.0121081
FBgn0019643	CG3318	AANAT1	8.28592e-06	0.0737512	0.161	0.096	0.0124289
FBgn0027339	CG11352	jim	8.91006e-06	1.88388	0.958	0.986	0.0133651
FBgn0051760	CG31760	CG31760	9.52968e-06	0.0650098	0.168	0.12	0.0142945
FBgn0270928	CG32848	VAChT	9.56356e-06	0.00999939	0.604	0.63	0.0143453
FBgn0001091	CG12055	Gapdh1	1.05344e-05	0.0983738	0.354	0.28	0.0158016
FBgn0029663	CG10804	CG10804	1.10348e-05	0.238399	0.296	0.156	0.0165522
FBgn0052206	CG32206	CG32206	1.13987e-05	0.0177988	0.312	0.285	0.0170981
FBgn0039349	CG4685	Ssadh	1.20277e-05	0.0229811	0.149	0.122	0.0180416
FBgn0052183	CG32183	Ccn	1.30812e-05	0.032195	0.188	0.171	0.0196218
FBgn0036043	CG8177	CG8177	1.32114e-05	0.112638	0.296	0.234	0.0198172
FBgn0010452	CG11280	trn	1.43257e-05	0.256802	0.302	0.23	0.0214885
FBgn0036494	CG7250	Toll-6	1.73468e-05	0.474107	0.423	0.271	0.0260202
FBgn0261649	CG31247	tinc	1.87561e-05	0.0392581	0.154	0.118	0.0281341
FBgn0050419	CG30419	CG30419	1.99182e-05	0.0522337	0.146	0.112	0.0298773
FBgn0262738	CG3620	norpA	2.00513e-05	0.0433726	0.479	0.492	0.0300769
FBgn0036725	CG18265	CG18265	2.08187e-05	0.0403166	0.112	0.079	0.0312281
FBgn0085399	CG34370	CG34370	2.12277e-05	0.05054	0.21	0.175	0.0318415
FBgn0259243	CG42341	Pka-R1	2.14322e-05	0.140642	0.274	0.181	0.0321482
FBgn0284245	CG8280	eEF1alpha1	2.26055e-05	0.128627	0.324	0.24	0.0339082
FBgn0005775	CG7503	Con	2.42262e-05	1.1875	0.603	0.423	0.0363393
FBgn0033446	CG1648	CG1648	2.50923e-05	0.0576798	0.144	0.102	0.0376385
FBgn0038498	CG14334	beat-IIa	2.76578e-05	0.34082	0.371	0.245	0.0414866
FBgn0259170	CG42275	alpha-Man-Ia	2.99124e-05	0.092087	0.248	0.177	0.0448686
FBgn0036144	CG6207	GlcAT-P	3.01997e-05	0.0409763	0.222	0.197	0.0452996
FBgn0030913	CG6123	CG6123	3.07645e-05	0.127679	0.228	0.162	0.0461467
FBgn0029824	CG3726	CG3726	3.24047e-05	0.125555	0.274	0.223	0.048607
FBgn0004198	CG11387	ct	3.83904e-05	1.69693	0.672	0.523	0.0575856
FBgn0000179	CG3578	bi	4.03485e-05	0.414356	0.406	0.314	0.0605227
FBgn0052698	CG32698	CARPB	4.08458e-05	0.16258	0.11	0.057	0.0612687
FBgn0052506	CG32506	CG32506	4.15477e-05	0.0641139	0.251	0.199	0.0623215
FBgn0033403	CG13739	CG13739	4.3927e-05	0.302629	0.332	0.194	0.0658905
FBgn0041097	CG5423	robo3	5.75562e-05	0.0459499	0.121	0.084	0.0863342
FBgn0033108	CG15236	CG15236	6.2671e-05	0.0877148	0.25	0.191	0.0940064
FBgn0040823	CG14162	dpr6	6.53488e-05	0.0631106	0.332	0.293	0.0980231
FBgn0264815	CG44007	Pde1c	6.74083e-05	0.169198	0.334	0.239	0.101112
FBgn0085409	CG34380	smal	6.90181e-05	0.0446582	0.248	0.223	0.103527
FBgn0000635	CG3665	Fas2	7.02231e-05	0.365737	0.288	0.141	0.105335
FBgn0259108	CG34387	futsch	7.8065e-05	1.26052	0.884	0.87	0.117098
FBgn0000636	CG5803	Fas3	9.53332e-05	0.105609	0.226	0.164	0.143
FBgn0023534	CG17778	CG17778	0.000109754	0.0388623	0.207	0.174	0.164631
FBgn0038246	CG14853	CG14853	0.000112517	-0.0189801	0.185	0.181	0.168775
FBgn0267910	CR34335	lncRNA:CR34335	0.000112729	16.4252	0.999	0.97	0.169094
FBgn0083975	CG34139	Nlg4	0.000122162	0.0546821	0.204	0.151	0.183243
FBgn0004580	CG6702	Cbp53E	0.000122186	2.41618	0.734	0.566	0.183279
FBgn0032840	CG13968	sNPF	0.000140561	0.258659	0.165	0.096	0.210842
FBgn0261113	CG17836	Xrp1	0.00014272	0.0522153	0.181	0.148	0.214081
FBgn0039816	CG11317	CG11317	0.0001474	0.0362052	0.107	0.071	0.221099
FBgn0003360	CG16944	sesB	0.000151355	0.362936	0.788	0.844	0.227033
FBgn0262018	CG42829	CadN2	0.000156861	0.0534211	0.148	0.1	0.235292
FBgn0027589	CG1688	CG1688	0.000160147	0.0920287	0.204	0.153	0.240221
FBgn0052204	CG32204	CG32204	0.000169965	0.0478154	0.174	0.138	0.254947
FBgn0264308	CG43778	CG43778	0.000171279	0.0656756	0.255	0.208	0.256918
FBgn0029922	CG14431	CG14431	0.000190983	0.0264359	0.119	0.085	0.286474
FBgn0265182	CG44247	CG44247	0.000192171	0.040691	0.166	0.131	0.288257
FBgn0085382	CG34353	CG34353	0.000207126	-0.00262027	0.285	0.266	0.310689
FBgn0053517	CG33517	Dop2R	0.000212116	3.13052	0.942	0.935	0.318174
FBgn0285952	CG3186	eEF5	0.000239976	0.0529701	0.258	0.218	0.359964
FBgn0259244	CG42342	CG42342	0.000249254	0.208263	0.375	0.276	0.373881
FBgn0015519	CG2302	nAChRalpha3	0.000285975	0.1098	0.298	0.242	0.428962
FBgn0066101	CG31094	LpR1	0.00028898	0.0885217	0.221	0.165	0.43347
FBgn0003326	CG17579	sca	0.000289214	0.0425074	0.129	0.086	0.433821
FBgn0038665	CG12269	euc	0.00031047	0.0455388	0.113	0.078	0.465706
FBgn0028481	CG4341	CG4341	0.00036403	0.0407401	0.236	0.188	0.546045
FBgn0013686	CR34094	mt:lrRNA	0.000364739	-2.16598	0.947	0.981	0.547109
FBgn0038084	CG14390	beat-Vc	0.00039712	0.0401816	0.117	0.082	0.59568
FBgn0263289	CG43398	scrib	0.000407039	0.0483155	0.176	0.129	0.610559
FBgn0264339	CG43795	CG43795	0.000417867	0.0445508	0.131	0.098	0.6268
FBgn0004369	CG11516	Ptp99A	0.000420369	0.740912	0.704	0.527	0.630554
FBgn0000567	CG32180	Eip74EF	0.000426191	0.0256904	0.105	0.084	0.639286
FBgn0034808	CG9896	CG9896	0.000439134	0.0488279	0.105	0.058	0.658701
FBgn0039617	CG14521	DIP-gamma	0.000471495	0.0367391	0.121	0.086	0.707242
FBgn0000037	CG4356	mAChR-A	0.000486174	0.202378	0.407	0.313	0.72926
FBgn0053202	CG33202	dpr11	0.000547853	0.0436948	0.239	0.207	0.821779
FBgn0037913	CG6783	fabp	0.000555164	0.00343643	0.159	0.129	0.832746
FBgn0020907	CG14904	Scp2	0.000566894	0.143164	0.171	0.111	0.850342
FBgn0024189	CG33141	sns	0.000609069	0.0391292	0.145	0.107	0.913604
FBgn0259245	CG42343	DIP-beta	0.00060976	0.0748619	0.105	0.067	0.91464
FBgn0262737	CG7437	mub	0.000619267	0.736082	0.784	0.766	0.9289
FBgn0013973	CG1470	Gycbeta100B	0.000620445	0.0562868	0.171	0.12	0.930667
FBgn0261928	CG42795	CG42795	0.000631658	0.135911	0.31	0.234	0.947487
FBgn0260943	CG32169	Rbp6	0.000648313	2.78701	0.854	0.836	0.972469
FBgn0031294	CG31795	IA-2	0.000648717	4.13244	0.967	0.975	0.973075
FBgn0259242	CG42340	CG42340	0.000681535	0.0716618	0.249	0.208	1
FBgn0260462	CG12163	CG12163	0.000686694	0.00163537	0.108	0.102	1
FBgn0267033	CG45477	mamo	0.000691938	0.814071	0.598	0.544	1
FBgn0283451	CG11491	br	0.000695361	0.228096	0.229	0.169	1
FBgn0037676	CG8861	CG8861	0.000764688	0.0830081	0.361	0.304	1
FBgn0264503	CG43902	CG43902	0.000906989	0.237604	0.351	0.258	1
FBgn0023179	CG6438	amon	0.000923336	0.189381	0.343	0.258	1
FBgn0038494	CG4135	beat-IIb	0.000942693	0.0650528	0.117	0.073	1
FBgn0051619	CG31619	nolo	0.000959846	0.12245	0.233	0.167	1
FBgn0004516	CG14994	Gad1	0.00096958	0.148294	0.146	0.065	1
FBgn0029939	CG9650	CG9650	0.000979985	0.116295	0.265	0.225	1
FBgn0267579	CR45919	lncRNA:CR45919	0.00103305	0.0502731	0.131	0.088	1
FBgn0011582	CG9652	Dop1R1	0.00106166	0.0699957	0.184	0.138	1
FBgn0038980	CG6919	Octbeta1R	0.00113226	0.0601528	0.124	0.086	1
FBgn0053179	CG33179	beat-IIIb	0.00115048	-0.0243925	0.321	0.323	1
FBgn0034636	CG10440	twz	0.00119713	0.0783812	0.109	0.067	1
FBgn0036927	CG7433	Gabat	0.0012073	0.0385739	0.228	0.194	1
FBgn0033438	CG1794	Mmp2	0.00131378	0.0880093	0.251	0.185	1
FBgn0033358	CG8216	spab	0.00133003	0.0451553	0.145	0.105	1
FBgn0285944	CG9907	para	0.00137543	0.528967	0.846	0.876	1
FBgn0285879	CG32577	disco-r	0.00139071	0.22292	0.217	0.159	1
FBgn0015400	CG4977	kek2	0.00142222	0.0126657	0.447	0.417	1
FBgn0027356	CG8604	Amph	0.0016209	0.0340881	0.176	0.138	1
FBgn0010113	CG15532	hdc	0.00165133	0.992492	0.571	0.356	1
FBgn0039584	CG14064	beat-VI	0.0016707	0.00699558	0.301	0.281	1
FBgn0259212	CG42312	cno	0.00170451	0.0288568	0.101	0.069	1
FBgn0037525	CG17816	CG17816	0.00192298	0.0887273	0.491	0.472	1
FBgn0032901	CG9339	sky	0.00192652	0.132907	0.459	0.39	1
FBgn0032048	CG13094	Dh31	0.00209278	-0.0155897	0.127	0.117	1
FBgn0259789	CG12701	zld	0.00244363	0.069919	0.186	0.144	1
FBgn0004858	CG4220	elB	0.00269647	0.0765464	0.173	0.121	1
FBgn0052647	CG32647	CG32647	0.00272489	0.0600884	0.279	0.243	1
FBgn0262593	CG43128	Shab	0.00274954	0.236214	0.484	0.37	1
FBgn0265194	CG44240	Trpm	0.00278117	0.0549552	0.111	0.073	1
FBgn0037521	CG2993	CG2993	0.00278457	0.122637	0.379	0.32	1
FBgn0259234	CG42332	Camta	0.00282023	0.018302	0.218	0.201	1
FBgn0040726	CG13439	dpr1	0.00284787	0.219081	0.389	0.31	1
FBgn0266851	CR45312	lncRNA:CR45312	0.00291882	0.0419858	0.229	0.181	1
FBgn0040397	CG3655	CG3655	0.00299381	0.0234383	0.153	0.136	1
FBgn0024944	CG3856	Oamb	0.00303968	0.0254786	0.112	0.089	1
FBgn0031632	CG15628	CG15628	0.00307456	0.0743741	0.544	0.517	1
FBgn0001233	CG1242	Hsp83	0.00360924	-0.0214991	0.498	0.515	1
FBgn0004509	CG10772	Fur1	0.00429159	0.0154608	0.159	0.148	1
FBgn0264606	CG43955	Fife	0.00434138	-0.0376258	0.467	0.504	1
FBgn0000303	CG12345	ChAT	0.0047178	0.236583	0.402	0.315	1
FBgn0015774	CG10521	NetB	0.00488202	0.120183	0.217	0.166	1
FBgn0034286	CG33996	dpr13	0.00501113	0.283385	0.479	0.392	1
FBgn0260003	CG34157	Dys	0.00531192	0.0429461	0.175	0.146	1
FBgn0264574	CG43946	Glut1	0.0054657	0.0876933	0.362	0.3	1
FBgn0033192	CG2105	Corin	0.00550579	0.174233	0.318	0.228	1
FBgn0029761	CG10706	SK	0.00551024	0.290332	0.524	0.458	1
FBgn0259216	CG42316	RhoGAP102A	0.00565269	-0.0565599	0.083	0.116	1
FBgn0029123	CG18024	SoxN	0.00577129	0.587141	0.45	0.375	1
FBgn0010412	CG4464	RpS19a	0.00596125	-0.00827504	0.262	0.253	1
FBgn0028645	CG7644	beat-Ib	0.00608567	0.156054	0.37	0.316	1
FBgn0038063	CG33976	Octbeta2R	0.0062414	0.197269	0.517	0.449	1
FBgn0263392	CG43444	Tet	0.00670632	0.0532554	0.617	0.625	1
FBgn0053143	CG33143	CG33143	0.00679885	0.0838488	0.304	0.249	1
FBgn0033484	CG2269	CG2269	0.00687522	0.837015	0.616	0.474	1
FBgn0038237	CG8279	Pde6	0.00716438	0.218729	0.547	0.487	1
FBgn0250908	CG42242	beat-VII	0.00733538	0.0322257	0.271	0.245	1
FBgn0085391	CG34362	trv	0.00776464	1.07319	0.718	0.703	1
FBgn0004449	CG5723	Ten-m	0.00815395	0.0140249	0.325	0.319	1
FBgn0263980	CG43729	Stacl	0.00823174	0.554323	0.639	0.573	1
FBgn0051361	CG31361	dpr17	0.00974409	0.0831247	0.233	0.209	1
FBgn0004514	CG7485	Oct-TyrR	0.0100188	0.00314494	0.103	0.09	1
FBgn0267668	CR46006	lncRNA:CR46006	0.0101417	0.00215697	0.275	0.261	1
FBgn0001235	CG17117	hth	0.0102366	0.492004	0.388	0.263	1
FBgn0034408	CG12758	sano	0.0107784	0.0505676	0.101	0.063	1
FBgn0030090	CG12664	fend	0.0110802	0.246966	0.458	0.359	1
FBgn0260660	CG42543	Mp	0.0111987	0.142382	0.317	0.254	1
FBgn0028888	CG4168	CG4168	0.0114902	0.0370735	0.129	0.102	1
FBgn0085413	CG34384	CG34384	0.0117869	0.110122	0.308	0.266	1
FBgn0030723	CG14948	dpr18	0.0119149	0.039881	0.147	0.112	1
FBgn0033250	CG14762	CG14762	0.0124387	0.0423601	0.526	0.518	1
FBgn0027598	CG31012	cindr	0.0130699	0.692188	0.653	0.46	1
FBgn0028644	CG4838	beat-Ic	0.0136618	0.82666	0.531	0.387	1
FBgn0086677	CG30040	jeb	0.0140669	0.570849	0.485	0.338	1
FBgn0001085	CG17697	fz	0.0144628	0.0748006	0.195	0.154	1
FBgn0002868	CG9470	MtnA	0.0149689	0.425948	0.404	0.22	1
FBgn0053516	CG33516	dpr3	0.0163314	0.0109383	0.144	0.131	1
FBgn0016797	CG9739	fz2	0.0184121	0.068658	0.256	0.234	1
FBgn0001234	CR31400	lncRNA:Hsromega	0.0189109	0.764589	0.984	0.995	1
FBgn0041094	CG7590	scyl	0.0190083	0.389273	0.505	0.372	1
FBgn0010453	CG4698	Wnt4	0.019745	0.00930903	0.122	0.109	1
FBgn0263772	CG43689	CG43689	0.0197792	0.30205	0.224	0.186	1
FBgn0013433	CG4846	beat-Ia	0.0198582	0.00454713	0.126	0.109	1
FBgn0036935	CG14186	CG14186	0.0213623	0.0447502	0.154	0.119	1
FBgn0287186	CG17594	scro	0.0215556	-0.0145925	0.305	0.293	1
FBgn0065099	CR33925	snRNA:7SK	0.0222381	0.47816	0.949	0.893	1
FBgn0085414	CG34385	dpr12	0.0231826	0.00825049	0.429	0.423	1
FBgn0264087	CG43756	Slob	0.0233461	0.0332689	0.231	0.199	1
FBgn0086778	CG32538	nAChRalpha7	0.0251197	0.310303	0.558	0.512	1
FBgn0010300	CG10719	brat	0.0257095	0.116906	0.338	0.272	1
FBgn0052062	CG32062	Rbfox1	0.0257098	1.56789	0.859	0.848	1
FBgn0032400	CG6770	CG6770	0.0263998	0.618262	0.743	0.644	1
FBgn0027608	CG2082	CG2082	0.0265094	0.175423	0.346	0.271	1
FBgn0263994	CG43737	CG43737	0.0265197	0.398822	0.546	0.427	1
FBgn0038321	CG6218	CG6218	0.0271202	0.0183235	0.123	0.107	1
FBgn0039938	CG11153	Sox102F	0.0274967	-0.00331983	0.174	0.164	1
FBgn0042630	CG32139	Sox21b	0.0275927	0.0102571	0.121	0.111	1
FBgn0085421	CG34392	Epac	0.0282311	0.0715022	0.258	0.222	1
FBgn0259111	CG42253	Ndae1	0.0288084	0.0248435	0.134	0.111	1
FBgn0034978	CG3257	CG3257	0.0296761	0.0426424	0.135	0.1	1
FBgn0000633	CG17716	CG17716	0.0310108	0.587558	0.488	0.351	1
FBgn0033196	CG1358	CG1358	0.0322158	0.0234935	0.103	0.08	1
FBgn0261549	CG42667	rdgA	0.0325084	0.0460665	0.451	0.405	1
FBgn0265597	CG44424	rad	0.0330274	0.247502	0.458	0.405	1
FBgn0000459	CG9908	disco	0.033553	0.181554	0.206	0.166	1
FBgn0041605	CG32490	cpx	0.033596	1.15867	0.978	0.981	1
FBgn0031697	CG14024	CG14024	0.0346937	0.0070907	0.15	0.144	1
FBgn0085385	CG34356	bma	0.0353538	0.0135279	0.162	0.157	1
FBgn0261574	CG7749	kug	0.036406	0.0278443	0.157	0.13	1
FBgn0051665	CG31665	wry	0.0371542	0.431704	0.571	0.476	1
FBgn0010415	CG10497	Sdc	0.03795	0.424113	0.632	0.516	1
FBgn0264386	CG15899	Ca-alpha1T	0.0393369	0.591473	0.6	0.562	1
FBgn0013576	CG32464	mtd	0.0407479	0.439132	0.679	0.606	1
FBgn0036165	CG7533	chrb	0.0408429	0.590194	0.627	0.548	1
FBgn0260793	CG42573	2mit	0.0412217	0.0582812	0.217	0.186	1
FBgn0036454	CG17839	CG17839	0.0421918	0.0282063	0.196	0.177	1
FBgn0051774	CG31774	fred	0.0426623	0.0316857	0.263	0.234	1
FBgn0085753	CR40596	28SrRNA-Psi:CR40596	0.0451157	-0.0131811	0.154	0.154	1
FBgn0259821	CG42402	CG42402	0.0459452	0.109576	0.387	0.327	1
FBgn0261788	CG42734	Ank2	0.0461713	0.725445	0.769	0.699	1
FBgn0050089	CG30089	CG30089	0.0495245	0.0271815	0.129	0.104	1
FBgn0004880	CG1130	scrt	0.0567271	0.516838	0.879	0.918	1
FBgn0028496	CG30116	CG30116	0.0567294	0.0422189	0.437	0.416	1
FBgn0010313	CG2530	corto	0.0569986	0.146217	0.361	0.284	1
FBgn0039380	CG5890	CG5890	0.0570074	-0.00175503	0.267	0.259	1
FBgn0035816	CG13685	CG13685	0.0582761	0.0653504	0.17	0.135	1
FBgn0001078	CG4059	ftz-f1	0.0587273	0.142182	0.448	0.385	1
FBgn0263257	CG43395	Cngl	0.0613513	1.16466	0.76	0.674	1
FBgn0032833	CG10664	COX4	0.0613936	0.113942	0.75	0.791	1
FBgn0262509	CG43079	nrm	0.0619097	0.0241163	0.233	0.228	1
FBgn0041707	CG1168	7B2	0.0647196	0.186672	0.677	0.646	1
FBgn0030432	CG4404	CG4404	0.0668052	0.0299491	0.114	0.087	1
FBgn0260658	CG42541	CG42541	0.0682861	-0.0471619	0.621	0.627	1
FBgn0259171	CG42276	Pde9	0.0688669	0.324104	0.559	0.496	1
FBgn0085447	CG34418	sif	0.0689076	1.52922	0.764	0.599	1
FBgn0263220	CG43388	Hk	0.0691007	0.523806	0.769	0.702	1
FBgn0003435	CG9218	sm	0.0694797	0.814227	0.854	0.882	1
FBgn0000411	CG5893	D	0.0766287	0.021401	0.12	0.095	1
FBgn0085395	CG34366	Shawl	0.0776697	0.0355149	0.183	0.158	1
FBgn0034753	CG2852	CG2852	0.0806544	0.139494	0.408	0.348	1
FBgn0085434	CG34405	NaCP60E	0.0813666	0.730679	0.697	0.614	1
FBgn0004611	CG4574	Plc21C	0.0823663	0.253228	0.434	0.337	1
FBgn0000575	CG1007	emc	0.0836671	0.041188	0.441	0.41	1
FBgn0265002	CG44153	CG44153	0.088054	-0.026844	0.274	0.263	1
FBgn0261836	CG42768	Msp300	0.0881806	0.852359	0.722	0.634	1
FBgn0085400	CG34371	side-V	0.0881957	0.0199435	0.137	0.125	1
FBgn0052600	CG32600	dpr8	0.0885802	0.159815	0.42	0.367	1
FBgn0264908	CG44099	pHCl-1	0.091735	0.06713	0.29	0.25	1
FBgn0266418	CG45058	wake	0.0917874	0.00575295	0.117	0.104	1
FBgn0036844	CG14080	Mkp3	0.0949295	0.393471	0.565	0.426	1
FBgn0010473	CG15427	tutl	0.0952096	0.320241	0.66	0.598	1
FBgn0053543	CG33543	CG33543	0.0972535	0.37616	0.432	0.315	1
FBgn0015399	CG12283	kek1	0.0986576	0.258514	0.484	0.386	1
FBgn0002643	CG8118	mam	0.101978	0.0529271	0.279	0.249	1
FBgn0039089	CG10152	beat-IV	0.102522	0.0577841	0.155	0.124	1
FBgn0004244	CG10537	Rdl	0.103715	1.18629	0.938	0.944	1
FBgn0034138	CG8332	RpS15	0.112645	0.560214	0.817	0.843	1
FBgn0023095	CG11282	caps	0.117238	0.0211524	0.186	0.159	1
FBgn0250910	CG42244	Octbeta3R	0.118599	0.038939	0.192	0.17	1
FBgn0051646	CG31646	DIP-theta	0.119484	0.102157	0.221	0.208	1
FBgn0267978	CG8376	ap	0.121024	-0.0416943	0.146	0.166	1
FBgn0284243	CG9277	betaTub56D	0.126832	0.175739	0.371	0.3	1
FBgn0286778	CG46385	CG46385	0.130476	0.0988371	0.32	0.263	1
FBgn0028704	CG18660	Nckx30C	0.133849	0.184462	0.763	0.77	1
FBgn0267001	CG42338	Ten-a	0.135877	1.57008	0.843	0.742	1
FBgn0014184	CG16747	Oda	0.136898	0.358462	0.63	0.584	1
FBgn0003423	CG1417	slgA	0.141812	0.198905	0.42	0.337	1
FBgn0003380	CG12348	Sh	0.142156	1.09875	0.908	0.926	1
FBgn0026160	CG7958	tna	0.143901	0.471585	0.53	0.392	1
FBgn0261597	CG10305	RpS26	0.147851	0.164384	0.729	0.773	1
FBgn0000116	CG32031	Argk	0.15493	0.148006	0.746	0.763	1
FBgn0000024	CG17907	Ace	0.156621	0.2066	0.623	0.586	1
FBgn0005771	CG4491	noc	0.158322	0.0272705	0.104	0.081	1
FBgn0285948	CG15442	RpL27A	0.160419	0.0798693	0.699	0.737	1
FBgn0085380	CG34351	CG34351	0.170857	-0.0031879	0.118	0.12	1
FBgn0037956	CG6959	CG6959	0.176047	0.00885493	0.109	0.094	1
FBgn0031414	CG33955	eys	0.178671	0.44688	0.506	0.423	1
FBgn0083950	CG34114	side-VI	0.180814	0.460561	0.506	0.382	1
FBgn0260657	CG42540	CG42540	0.184133	0.319502	0.713	0.653	1
FBgn0037171	CG14459	CG14459	0.188604	-0.04348	0.125	0.141	1
FBgn0017590	CG6669	klg	0.189656	0.129142	0.521	0.466	1
FBgn0003274	CG4918	RpLP2	0.19292	0.165712	0.519	0.489	1
FBgn0039054	CG13830	Cow	0.197593	0.162709	0.471	0.425	1
FBgn0267253	CG32700	CG32700	0.199294	0.185874	0.314	0.248	1
FBgn0011828	CG12002	Pxn	0.200274	-0.028823	0.112	0.133	1
FBgn0052432	CG32432	CG32432	0.201219	0.0470698	0.309	0.28	1
FBgn0031835	CG11319	CG11319	0.206052	0.133916	0.318	0.282	1
FBgn0038087	CG10134	beat-Va	0.208142	0.018569	0.147	0.134	1
FBgn0261804	CG42750	CG42750	0.209222	0.0594686	0.398	0.377	1
FBgn0265598	CG44425	Bx	0.220584	0.0531787	0.212	0.205	1
FBgn0034725	CG6044	CG6044	0.225195	0.0367237	0.33	0.306	1
FBgn0000042	CG4027	Act5C	0.225912	0.322772	0.582	0.528	1
FBgn0051221	CG31221	CG31221	0.232597	4.93368	0.945	0.951	1
FBgn0031736	CG11030	CG11030	0.239548	0.0441734	0.175	0.152	1
FBgn0010411	CG8900	RpS18	0.243848	0.0583916	0.762	0.834	1
FBgn0038653	CG18208	Octalpha2R	0.244066	0.0850638	0.354	0.32	1
FBgn0000036	CG5610	nAChRalpha1	0.251035	0.0543201	0.421	0.406	1
FBgn0011666	CG5099	msi	0.255983	0.838083	0.672	0.515	1
FBgn0266871	CR45332	lncRNA:CR45332	0.257383	0.0183941	0.112	0.095	1
FBgn0052264	CG32264	CG32264	0.27073	0.392826	0.766	0.747	1
FBgn0085383	CG34354	CG34354	0.271252	0.0442931	0.346	0.335	1
FBgn0038282	CG33485	dpr9	0.273519	0.575058	0.493	0.368	1
FBgn0035032	CG4692	ATPsynF	0.275928	0.416452	0.758	0.731	1
FBgn0261552	CG42670	ps	0.286099	0.839491	0.901	0.94	1
FBgn0010114	CG2040	hig	0.288356	0.384834	0.609	0.548	1
FBgn0085407	CG34378	Pvf3	0.297873	0.533112	0.51	0.386	1
FBgn0029897	CG3203	RpL17	0.299905	0.0989323	0.608	0.588	1
FBgn0261258	CG6014	rgn	0.307145	0.0708579	0.321	0.304	1
FBgn0083963	CG34127	Nlg3	0.307918	0.117375	0.554	0.514	1
FBgn0037874	CG4800	Tctp	0.318462	-0.0167158	0.367	0.366	1
FBgn0027654	CG2239	jdp	0.329588	0.556431	0.61	0.518	1
FBgn0015609	CG7100	CadN	0.336502	0.199218	0.489	0.402	1
FBgn0262869	CG43224	Gfrl	0.347703	0.0983892	0.55	0.512	1
FBgn0263397	CG8585	Ih	0.370011	1.7046	0.845	0.815	1
FBgn0265052	CG44167	St3	0.38097	0.0121625	0.246	0.238	1
FBgn0266137	CG18741	Dop1R2	0.391641	-0.00174276	0.107	0.109	1
FBgn0267252	CG3694	Ggamma30A	0.393174	1.63386	0.977	0.984	1
FBgn0000064	CG6058	Ald1	0.395727	0.475439	0.64	0.553	1
FBgn0066084	CG30425	RpL41	0.406303	2.70971	0.843	0.676	1
FBgn0013688	CR34096	mt:srRNA	0.417848	-0.0107327	0.178	0.176	1
FBgn0029814	CG15765	CG15765	0.424535	0.271901	0.537	0.457	1
FBgn0039064	CG4467	CG4467	0.431344	0.209199	0.537	0.482	1
FBgn0002593	CG4087	RpLP1	0.443316	0.360368	0.716	0.667	1
FBgn0250839	CG2016	CG2016	0.445278	0.0897398	0.106	0.078	1
FBgn0003165	CG9755	pum	0.446113	0.475123	0.793	0.778	1
FBgn0030897	CG5744	Frq1	0.449801	0.926307	0.71	0.604	1
FBgn0010263	CG3151	Rbp9	0.452248	0.313525	0.537	0.425	1
FBgn0024963	CG7535	GluClalpha	0.466051	0.601445	0.738	0.702	1
FBgn0035499	CG14996	Chd64	0.46877	0.0228645	0.112	0.097	1
FBgn0013954	CG11001	Fkbp12	0.475013	0.133257	0.481	0.449	1
FBgn0267336	CG34360	Glut4EF	0.492607	0.944127	0.836	0.85	1
FBgn0261244	CG33174	inaE	0.520062	0.341289	0.494	0.395	1
FBgn0000535	CG10952	eag	0.524322	0.0140801	0.281	0.289	1
FBgn0266801	CG45263	CG45263	0.532261	0.133057	0.428	0.376	1
FBgn0014163	CG4609	fax	0.534125	0.8833	0.631	0.472	1
FBgn0000108	CG7727	Appl	0.584872	0.770128	0.793	0.81	1
FBgn0261262	CG42613	CG42613	0.586864	0.847174	0.643	0.476	1
FBgn0034731	CG10384	CG10384	0.627071	0.0170441	0.223	0.208	1
FBgn0083949	CG34113	side-III	0.648601	0.484315	0.535	0.444	1
FBgn0016061	CG31062	side	0.653234	0.181897	0.461	0.431	1
FBgn0000422	CG10697	Ddc	0.654167	0.146585	0.406	0.373	1
FBgn0033356	CG8229	CG8229	0.655378	-0.0011782	0.107	0.104	1
FBgn0038839	CG10830	Ktl	0.669186	0.0436518	0.267	0.25	1
FBgn0039647	CG14509	jus	0.672744	0.159367	0.498	0.452	1
FBgn0019650	CG11186	toy	0.679015	-0.00403473	0.402	0.415	1
FBgn0013981	CG3379	His4r	0.70173	0.825939	0.939	0.936	1
FBgn0265487	CG33197	mbl	0.703126	0.922868	0.59	0.491	1
FBgn0264001	CG43744	bru3	0.705323	0.59842	0.571	0.496	1
FBgn0261089	CG5559	Sytalpha	0.705713	-0.0122484	0.172	0.178	1
FBgn0085432	CG34403	pan	0.708131	0.123831	0.739	0.775	1
FBgn0038826	CG17838	Syp	0.7682	0.275976	0.506	0.445	1
FBgn0053147	CG33147	Hs3st-A	0.76935	0.469603	0.743	0.693	1
FBgn0264006	CG43749	dysc	0.782329	0.448451	0.792	0.76	1
FBgn0085387	CG34358	shakB	0.794731	0.254842	0.478	0.406	1
FBgn0263995	CG43738	cpo	0.798509	0.403071	0.801	0.792	1
FBgn0264895	CG44086	RapGAP1	0.798942	0.348708	0.52	0.44	1
FBgn0003429	CG10693	slo	0.817981	0.412678	0.652	0.563	1
FBgn0265296	CG42256	Dscam2	0.829802	0.747812	0.765	0.724	1
FBgn0003091	CG6622	Pkc53E	0.83507	0.52651	0.57	0.464	1
FBgn0028875	CG32975	nAChRalpha5	0.855429	0.63329	0.749	0.667	1
FBgn0000273	CG4379	Pka-C1	0.856191	0.435638	0.627	0.544	1
FBgn0022382	CG15862	Pka-R2	0.864462	0.144514	0.352	0.279	1
FBgn0263353	CG11000	CG11000	0.880656	0.389574	0.507	0.371	1
FBgn0004242	CG3139	Syt1	0.88306	0.561975	0.82	0.849	1
FBgn0030412	CG17762	Tomosyn	0.885876	0.43453	0.622	0.537	1
FBgn0264490	CG18389	Eip93F	0.895556	0.335638	0.394	0.304	1
FBgn0001186	CG3001	Hex-A	0.9693	1.40964	0.671	0.402	1
FBgn0086758	CG31666	chinmo	0.970138	0.36454	0.728	0.666	1
FBgn0032797	CG10186	Hasp	0.995933	0.633318	0.801	0.807	1

## Sheet: Male_C7
FlyBaseID	GeneID	Gene symbol	p_val	avg_diff	pct.1	pct.2	p_val_adj
FBgn0019660	CR32665	lncRNA:roX2	2.04459e-206	-2.1221	0.01	0.797	3.06689e-203
FBgn0004047	CG11129	Yp3	8.87617e-74	0.213951	0.182	0.002	1.33142e-70
FBgn0267519	CR45859	28SrRNA-Psi:CR45859	3.53787e-19	-0.081999	0.059	0.128	5.3068e-16
FBgn0051690	CG31690	CG31690	5.11732e-19	0.374219	0.424	0.232	7.67598e-16
FBgn0087002	CG11064	apolpp	1.24727e-17	0.150822	0.18	0.079	1.87091e-14
FBgn0260429	CG42524	CG42524	6.51137e-16	0.259632	0.322	0.173	9.76706e-13
FBgn0058469	CR40469	lncRNA:CR40469	8.44929e-13	0.0928515	0.146	0.067	1.26739e-09
FBgn0004619	CG8442	GluRIA	1.64321e-12	0.408265	0.33	0.144	2.46481e-09
FBgn0002940	CG4550	ninaE	2.48691e-12	0.00494867	0.145	0.264	3.73036e-09
FBgn0052982	CG32982	CG32982	1.85786e-11	0.275667	0.31	0.187	2.78678e-08
FBgn0050115	CG30115	GEFmeso	2.12966e-11	0.092325	0.131	0.061	3.19448e-08
FBgn0052521	CG32521	CG32521	3.73073e-11	0.0809837	0.176	0.106	5.59609e-08
FBgn0004652	CG14307	fru	1.09702e-10	0.508645	0.363	0.158	1.64553e-07
FBgn0002543	CG5481	robo2	1.9362e-10	0.116354	0.118	0.046	2.9043e-07
FBgn0015766	CG10596	Msr-110	7.85204e-10	0.0507803	0.113	0.059	1.17781e-06
FBgn0035050	CG4871	SiaT	3.80043e-09	0.198338	0.172	0.083	5.70065e-06
FBgn0250867	CG42238	CG42238	4.3917e-09	0.143226	0.281	0.188	6.58754e-06
FBgn0037963	CG6977	Cad87A	8.6282e-09	0.0898582	0.138	0.07	1.29423e-05
FBgn0036821	CG3961	CG3961	1.78628e-08	0.276659	0.284	0.168	2.67942e-05
FBgn0052626	CG32626	AMPdeam	2.18243e-08	0.0597526	0.216	0.178	3.27365e-05
FBgn0004595	CG17228	pros	2.2608e-07	9.52452	0.99	0.998	0.000339119
FBgn0051092	CG31092	LpR2	3.76187e-07	0.0784567	0.154	0.091	0.000564281
FBgn0030272	CG15201	CG15201	4.33242e-07	0.0817208	0.173	0.106	0.000649863
FBgn0004168	CG16720	5-HT1A	5.20956e-07	0.198586	0.267	0.177	0.000781433
FBgn0030158	CG9686	CG9686	6.69347e-07	0.0360696	0.115	0.08	0.00100402
FBgn0029768	CG16752	SPR	8.18694e-07	0.262979	0.248	0.146	0.00122804
FBgn0037676	CG8861	CG8861	9.1909e-07	0.347761	0.433	0.305	0.00137864
FBgn0285926	CG1691	Imp	9.19244e-07	0.22354	0.146	0.05	0.00137887
FBgn0052057	CG32057	dpr10	1.25786e-06	0.208303	0.289	0.189	0.00188679
FBgn0040153	CG32597	l(1)G0469	1.29039e-06	0.0527808	0.123	0.076	0.00193559
FBgn0031299	CG4629	CG4629	1.33881e-06	0.0758846	0.167	0.109	0.00200821
FBgn0264090	CG43759	CG43759	1.57295e-06	0.294732	0.298	0.186	0.00235943
FBgn0050463	CG30463	Pgant9	1.9014e-06	0.160561	0.294	0.202	0.00285211
FBgn0024321	CG8524	NK7.1	1.97946e-06	0.109638	0.239	0.164	0.00296919
FBgn0083228	CG5907	Frq2	2.11874e-06	0.501666	0.461	0.315	0.00317811
FBgn0087012	CG1056	5-HT2A	2.16381e-06	0.148994	0.143	0.065	0.00324571
FBgn0004607	CG1449	zfh2	2.45318e-06	0.104554	0.153	0.092	0.00367977
FBgn0041605	CG32490	cpx	3.51938e-06	2.28377	0.985	0.973	0.00527908
FBgn0031971	CG7224	Sirup	4.13104e-06	0.0475614	0.169	0.129	0.00619655
FBgn0086604	CG12484	side-VIII	6.84083e-06	0.146836	0.285	0.21	0.0102613
FBgn0052683	CG32683	CG32683	8.25477e-06	0.0874892	0.174	0.114	0.0123822
FBgn0019985	CG11144	mGluR	1.15074e-05	0.160027	0.277	0.196	0.017261
FBgn0036801	CG6896	MYPT-75D	1.16263e-05	0.127161	0.321	0.249	0.0174395
FBgn0013995	CG5685	Calx	1.56244e-05	0.289114	0.322	0.221	0.0234366
FBgn0052066	CG32066	CG32066	1.6506e-05	0.10311	0.182	0.121	0.024759
FBgn0019662	CG8593	qm	1.85872e-05	0.132509	0.234	0.154	0.0278807
FBgn0020269	CG10145	mspo	2.72956e-05	0.218539	0.289	0.182	0.0409435
FBgn0013718	CG33991	nuf	2.90231e-05	0.0610161	0.116	0.067	0.0435347
FBgn0004880	CG1130	scrt	3.18501e-05	1.18978	0.924	0.928	0.0477752
FBgn0263219	CG42330	Dscam4	3.26005e-05	0.155477	0.234	0.144	0.0489008
FBgn0027339	CG11352	jim	3.70426e-05	1.9645	0.988	0.989	0.055564
FBgn0264442	CG43860	ab	7.17486e-05	0.109014	0.34	0.294	0.107623
FBgn0053087	CG33087	LRP1	9.27257e-05	0.0471853	0.132	0.085	0.139089
FBgn0260971	CG42594	CG42594	9.51781e-05	0.337314	0.357	0.244	0.142767
FBgn0000097	CG3166	aop	9.96353e-05	0.0933855	0.232	0.167	0.149453
FBgn0261260	CG42611	mgl	0.000100147	0.0419358	0.136	0.113	0.150221
FBgn0002945	CG11614	nkd	0.000118441	0.207483	0.3	0.217	0.177661
FBgn0040877	CG12994	CG12994	0.000127088	0.052322	0.113	0.078	0.190632
FBgn0261597	CG10305	RpS26	0.000133872	0.460332	0.784	0.774	0.200808
FBgn0031275	CG3022	GABA-B-R3	0.00014047	0.0620389	0.103	0.052	0.210705
FBgn0036789	CG13702	AstC-R2	0.000140477	0.0898883	0.208	0.18	0.210715
FBgn0014859	CG1864	Hr38	0.000149822	0.177182	0.304	0.206	0.224733
FBgn0065099	CR33925	snRNA:7SK	0.000154327	0.442733	0.899	0.843	0.231491
FBgn0050419	CG30419	CG30419	0.000185881	0.124732	0.203	0.133	0.278821
FBgn0051361	CG31361	dpr17	0.00019542	0.112496	0.201	0.126	0.29313
FBgn0028369	CG3653	kirre	0.000237671	0.228963	0.364	0.253	0.356507
FBgn0030913	CG6123	CG6123	0.000279339	0.153973	0.209	0.119	0.419008
FBgn0085420	CG34391	DIP-delta	0.00028788	0.229737	0.313	0.22	0.43182
FBgn0003499	CG7847	sr	0.000299624	0.109615	0.167	0.098	0.449436
FBgn0015400	CG4977	kek2	0.000316822	-0.015553	0.381	0.367	0.475233
FBgn0031530	CG3254	Pgant2	0.000329545	0.0799158	0.184	0.138	0.494318
FBgn0032666	CG5758	CG5758	0.000367953	0.220569	0.33	0.222	0.551929
FBgn0000547	CG12676	ed	0.000371083	0.151378	0.275	0.196	0.556625
FBgn0013973	CG1470	Gycbeta100B	0.000392548	0.108442	0.231	0.162	0.588822
FBgn0033405	CG13954	CG13954	0.000484922	0.217411	0.305	0.199	0.727383
FBgn0000121	CG5962	Arr2	0.000494889	-0.000526454	0.129	0.17	0.742333
FBgn0002023	CG10699	Lim3	0.000501482	0.0833904	0.103	0.054	0.752222
FBgn0027589	CG1688	CG1688	0.000503167	0.090302	0.171	0.107	0.754751
FBgn0004573	CG12073	5-HT7	0.000548205	0.0583086	0.104	0.061	0.822307
FBgn0260658	CG42541	CG42541	0.000574864	0.219938	0.408	0.327	0.862296
FBgn0052183	CG32183	Ccn	0.000588165	0.0657917	0.232	0.195	0.882248
FBgn0029663	CG10804	CG10804	0.000603183	0.103335	0.243	0.191	0.904774
FBgn0083949	CG34113	side-III	0.00070647	0.623818	0.55	0.412	1
FBgn0051619	CG31619	nolo	0.000760115	0.228744	0.357	0.256	1
FBgn0263773	CG43690	fok	0.000766804	0.152732	0.238	0.16	1
FBgn0035495	CG14989	CG14989	0.000824748	0.607453	0.356	0.306	1
FBgn0262614	CG43140	pyd	0.000843399	0.265401	0.372	0.293	1
FBgn0038542	CG7431	TyrR	0.000862233	0.0848569	0.134	0.088	1
FBgn0264273	CG33960	Sema2b	0.000936583	0.175535	0.293	0.212	1
FBgn0285963	CG46339	CG46339	0.000987153	0.11843	0.246	0.18	1
FBgn0261509	CG14351	haf	0.00101706	0.163389	0.203	0.138	1
FBgn0263706	CG43658	CG43658	0.00102822	0.0131087	0.167	0.155	1
FBgn0033356	CG8229	CG8229	0.00104377	-0.00936337	0.144	0.153	1
FBgn0025360	CG18455	Optix	0.00106116	0.133306	0.144	0.1	1
FBgn0015777	CG9261	nrv2	0.0010802	0.0437258	0.159	0.119	1
FBgn0004198	CG11387	ct	0.00112726	0.651224	0.281	0.136	1
FBgn0261046	CG31190	Dscam3	0.00116885	0.0188546	0.232	0.229	1
FBgn0001319	CG10197	kn	0.00118171	0.0846012	0.123	0.082	1
FBgn0051163	CG31163	SKIP	0.00126452	0.306735	0.436	0.337	1
FBgn0261648	CG6464	salm	0.00127784	0.0875118	0.176	0.144	1
FBgn0051814	CG31814	DIP-kappa	0.00139676	0.102433	0.178	0.128	1
FBgn0283451	CG11491	br	0.00149698	0.376746	0.325	0.257	1
FBgn0250869	CG42240	CG42240	0.00164696	0.0347309	0.123	0.093	1
FBgn0039420	CG6154	CG6154	0.00168984	0.103486	0.27	0.205	1
FBgn0031738	CG9171	CG9171	0.00170322	0.0613771	0.2	0.16	1
FBgn0085426	CG34397	Rgk3	0.00172036	0.0764036	0.162	0.119	1
FBgn0262473	CG5490	Tl	0.00185676	0.0903997	0.194	0.147	1
FBgn0283499	CG18402	InR	0.00197543	0.0294965	0.201	0.187	1
FBgn0052698	CG32698	CARPB	0.00200681	0.1329	0.15	0.102	1
FBgn0029824	CG3726	CG3726	0.00222785	0.109503	0.191	0.135	1
FBgn0029123	CG18024	SoxN	0.00235364	0.272658	0.178	0.104	1
FBgn0085370	CG34341	Pde11	0.0024876	0.052134	0.153	0.115	1
FBgn0000636	CG5803	Fas3	0.00277533	0.0724476	0.206	0.163	1
FBgn0001234	CR31400	lncRNA:Hsromega	0.00294445	1.52667	0.985	0.988	1
FBgn0261285	CG5629	Ppcs	0.00305623	0.0894596	0.172	0.118	1
FBgn0040297	CG9256	Nhe2	0.00310705	0.0217426	0.144	0.108	1
FBgn0085410	CG34381	TrissinR	0.00325169	0.0550596	0.14	0.097	1
FBgn0266100	CG44837	CG44837	0.00366311	0.0592863	0.134	0.088	1
FBgn0035041	CG13594	CG13594	0.0037069	0.0598804	0.144	0.097	1
FBgn0085400	CG34371	side-V	0.00382872	0.0883466	0.249	0.188	1
FBgn0020621	CG2049	Pkn	0.00395113	0.0489452	0.12	0.082	1
FBgn0260941	CG42318	app	0.00401214	0.122822	0.239	0.182	1
FBgn0259677	CG42346	CG42346	0.00406331	0.0974392	0.179	0.129	1
FBgn0259243	CG42341	Pka-R1	0.00411098	0.179476	0.336	0.235	1
FBgn0051324	CG31324	CG31324	0.00418608	0.215741	0.346	0.255	1
FBgn0263397	CG8585	Ih	0.00422373	2.56693	0.899	0.847	1
FBgn0015774	CG10521	NetB	0.00441264	0.0833452	0.222	0.18	1
FBgn0001297	CG33956	kay	0.00511105	0.021013	0.111	0.09	1
FBgn0004395	CG4620	unk	0.00533309	0.0728387	0.226	0.177	1
FBgn0053696	CG33696	CNMaR	0.00548317	0.059354	0.107	0.08	1
FBgn0262782	CG5362	Mdh1	0.0055241	0.031685	0.196	0.17	1
FBgn0037171	CG14459	CG14459	0.00564793	-0.0986425	0.216	0.277	1
FBgn0259245	CG42343	DIP-beta	0.00637058	0.0765465	0.126	0.083	1
FBgn0036454	CG17839	CG17839	0.00646222	0.0845335	0.157	0.113	1
FBgn0050361	CG30361	mtt	0.0066171	0.0411687	0.112	0.085	1
FBgn0038980	CG6919	Octbeta1R	0.00705332	0.0284737	0.146	0.119	1
FBgn0036144	CG6207	GlcAT-P	0.00768896	0.0111307	0.274	0.279	1
FBgn0066084	CG30425	RpL41	0.00791674	3.58712	0.879	0.764	1
FBgn0040823	CG14162	dpr6	0.00793782	0.164728	0.327	0.249	1
FBgn0040532	CG8369	CG8369	0.00800882	0.0761855	0.177	0.138	1
FBgn0085409	CG34380	smal	0.00803872	0.0881886	0.272	0.23	1
FBgn0263994	CG43737	CG43737	0.00829168	0.310458	0.597	0.553	1
FBgn0085397	CG34368	Fili	0.00910629	0.068785	0.123	0.083	1
FBgn0027608	CG2082	CG2082	0.00926728	0.0864062	0.335	0.277	1
FBgn0029814	CG15765	CG15765	0.00933686	0.146971	0.537	0.507	1
FBgn0038321	CG6218	CG6218	0.0104972	0.0472154	0.15	0.109	1
FBgn0264339	CG43795	CG43795	0.0112035	0.0448013	0.174	0.141	1
FBgn0044328	CG32052	CG32052	0.0116037	0.0521942	0.193	0.15	1
FBgn0052506	CG32506	CG32506	0.011775	0.0920769	0.245	0.186	1
FBgn0083963	CG34127	Nlg3	0.0121156	0.257007	0.575	0.503	1
FBgn0261588	CG42698	pdm3	0.0128003	0.231196	0.304	0.238	1
FBgn0033159	CG17800	Dscam1	0.0131349	0.074749	0.192	0.142	1
FBgn0051708	CG31708	DIP-zeta	0.0134951	0.097755	0.129	0.097	1
FBgn0010300	CG10719	brat	0.0140544	0.0961606	0.316	0.264	1
FBgn0051646	CG31646	DIP-theta	0.0143965	0.105802	0.17	0.131	1
FBgn0032400	CG6770	CG6770	0.0144128	0.647501	0.774	0.678	1
FBgn0025525	CG9102	bab2	0.0152062	0.0971233	0.165	0.12	1
FBgn0001226	CG4466	Hsp27	0.0153835	0.0142143	0.101	0.083	1
FBgn0000575	CG1007	emc	0.0154529	0.0818486	0.477	0.42	1
FBgn0261649	CG31247	tinc	0.0158696	0.0791186	0.167	0.115	1
FBgn0259213	CG42313	side-II	0.0168892	0.196134	0.396	0.331	1
FBgn0053516	CG33516	dpr3	0.0174278	0.0345128	0.141	0.102	1
FBgn0261804	CG42750	CG42750	0.0177658	0.263235	0.454	0.356	1
FBgn0266851	CR45312	lncRNA:CR45312	0.0186053	0.00970932	0.126	0.104	1
FBgn0039209	CG13624	REPTOR	0.0186651	0.109307	0.28	0.212	1
FBgn0260660	CG42543	Mp	0.0188435	0.172301	0.362	0.278	1
FBgn0032629	CG15138	beat-IIIc	0.0197181	0.1403	0.42	0.42	1
FBgn0033403	CG13739	CG13739	0.0207099	0.10481	0.208	0.158	1
FBgn0003274	CG4918	RpLP2	0.0209242	0.128259	0.6	0.607	1
FBgn0265052	CG44167	St3	0.0213638	0.0496672	0.182	0.148	1
FBgn0261871	CG33507	dpr2	0.0220722	0.00309856	0.117	0.117	1
FBgn0283651	CG46301	CG46301	0.0228063	0.141767	0.252	0.202	1
FBgn0037913	CG6783	fabp	0.0229571	0.0232693	0.203	0.173	1
FBgn0265595	CG44422	CG44422	0.0233581	0.259692	0.352	0.261	1
FBgn0030505	CG11172	NFAT	0.0235342	0.119054	0.272	0.199	1
FBgn0017590	CG6669	klg	0.0240002	0.405468	0.528	0.473	1
FBgn0259171	CG42276	Pde9	0.0241029	0.247825	0.525	0.49	1
FBgn0028407	CG8364	Drep3	0.0246089	0.052841	0.128	0.093	1
FBgn0004635	CG1004	rho	0.0246697	0.0429662	0.104	0.069	1
FBgn0262508	CG43078	CG43078	0.025309	0.0202986	0.138	0.125	1
FBgn0030574	CG9413	sbm	0.0267331	0.0360546	0.162	0.134	1
FBgn0010263	CG3151	Rbp9	0.0267585	0.230249	0.534	0.529	1
FBgn0033987	CG12424	ckn	0.0268781	0.109886	0.221	0.165	1
FBgn0051345	CG31345	CG31345	0.0271301	0.157109	0.241	0.186	1
FBgn0038641	CG7708	ChT	0.0276374	0.00543752	0.265	0.282	1
FBgn0029761	CG10706	SK	0.028087	0.455285	0.594	0.52	1
FBgn0001125	CG4233	Got2	0.0282688	0.0342797	0.103	0.074	1
FBgn0085384	CG34355	CG34355	0.0289572	0.0507803	0.203	0.176	1
FBgn0066101	CG31094	LpR1	0.0291149	0.0658294	0.225	0.196	1
FBgn0000179	CG3578	bi	0.0291389	0.329711	0.289	0.214	1
FBgn0040765	CG33473	luna	0.0294098	0.354672	0.382	0.273	1
FBgn0033438	CG1794	Mmp2	0.0302676	0.00861881	0.296	0.278	1
FBgn0261549	CG42667	rdgA	0.0305967	0.199451	0.312	0.248	1
FBgn0261262	CG42613	CG42613	0.0322093	0.925717	0.67	0.527	1
FBgn0261698	CG42732	SLO2	0.0327607	0.212093	0.395	0.319	1
FBgn0033268	CG2297	Obp44a	0.0329909	0.234776	0.253	0.178	1
FBgn0085385	CG34356	bma	0.033215	0.0468695	0.106	0.075	1
FBgn0267668	CR46006	lncRNA:CR46006	0.0340358	0.0674764	0.15	0.109	1
FBgn0267322	CR45758	lncRNA:CR45758	0.0348947	0.0681608	0.202	0.167	1
FBgn0052206	CG32206	CG32206	0.0355506	0.0731621	0.296	0.258	1
FBgn0085395	CG34366	Shawl	0.036684	0.024059	0.155	0.129	1
FBgn0003360	CG16944	sesB	0.0374116	0.7049	0.907	0.913	1
FBgn0039584	CG14064	beat-VI	0.039183	0.0282029	0.25	0.225	1
FBgn0011818	CG9884	oaf	0.0394284	0.0596172	0.173	0.145	1
FBgn0037015	CG13253	cmpy	0.0398725	0.0949423	0.294	0.24	1
FBgn0015229	CG6575	glec	0.041497	0.340601	0.363	0.204	1
FBgn0003301	CG9533	rut	0.0419784	0.0760952	0.276	0.23	1
FBgn0264753	CG44011	Rgk1	0.0438324	0.134231	0.27	0.219	1
FBgn0010434	CG11949	cora	0.0494231	0.0153424	0.131	0.113	1
FBgn0031016	CG12199	kek5	0.0494267	0.0408228	0.111	0.074	1
FBgn0029897	CG3203	RpL17	0.0499936	0.0989283	0.692	0.739	1
FBgn0053517	CG33517	Dop2R	0.0519976	1.95165	0.814	0.718	1
FBgn0038498	CG14334	beat-IIa	0.0525309	0.300711	0.349	0.273	1
FBgn0041097	CG5423	robo3	0.053024	0.0192306	0.174	0.149	1
FBgn0004449	CG5723	Ten-m	0.0534118	0.0265032	0.415	0.427	1
FBgn0033108	CG15236	CG15236	0.0536671	0.104433	0.208	0.147	1
FBgn0085387	CG34358	shakB	0.0555116	0.238649	0.624	0.599	1
FBgn0264794	CR44024	lncRNA:CR44024	0.0562881	0.121995	0.396	0.345	1
FBgn0053143	CG33143	CG33143	0.0581027	0.0638439	0.285	0.244	1
FBgn0035173	CG13907	CG13907	0.0584602	0.0592487	0.144	0.102	1
FBgn0031424	CG9887	VGlut	0.0592833	0.188448	0.193	0.13	1
FBgn0011582	CG9652	Dop1R1	0.0602396	0.0525401	0.192	0.155	1
FBgn0053179	CG33179	beat-IIIb	0.0603097	0.12498	0.383	0.329	1
FBgn0028496	CG30116	CG30116	0.0647343	0.214237	0.354	0.296	1
FBgn0001078	CG4059	ftz-f1	0.0655621	0.147031	0.42	0.379	1
FBgn0265598	CG44425	Bx	0.0656502	0.109232	0.201	0.152	1
FBgn0284245	CG8280	eEF1alpha1	0.0659681	0.159839	0.351	0.27	1
FBgn0004858	CG4220	elB	0.066006	0.0548641	0.218	0.172	1
FBgn0085399	CG34370	CG34370	0.0676365	0.0973715	0.273	0.233	1
FBgn0028370	CG4192	kek3	0.0704732	0.119498	0.185	0.135	1
FBgn0263353	CG11000	CG11000	0.0717512	0.356003	0.515	0.42	1
FBgn0052204	CG32204	CG32204	0.0722192	-0.00454255	0.118	0.123	1
FBgn0041094	CG7590	scyl	0.0755921	0.195901	0.505	0.445	1
FBgn0004580	CG6702	Cbp53E	0.0760271	2.18332	0.643	0.536	1
FBgn0001235	CG17117	hth	0.0779956	0.932561	0.636	0.517	1
FBgn0260793	CG42573	2mit	0.0798674	0.0223141	0.204	0.191	1
FBgn0035756	CG32381	unc-13-4A	0.0817041	0.0842553	0.227	0.186	1
FBgn0264606	CG43955	Fife	0.0819567	0.117963	0.312	0.269	1
FBgn0260442	CG6831	rhea	0.0838444	0.012319	0.116	0.107	1
FBgn0000287	CG4881	salr	0.0851856	0.206618	0.253	0.219	1
FBgn0264503	CG43902	CG43902	0.0897902	0.223187	0.34	0.272	1
FBgn0085391	CG34362	trv	0.0900804	1.25234	0.737	0.691	1
FBgn0264815	CG44007	Pde1c	0.0919142	0.141361	0.323	0.274	1
FBgn0033368	CG13743	CG13743	0.0924645	0.050675	0.198	0.169	1
FBgn0028481	CG4341	CG4341	0.0930687	0.0871658	0.278	0.233	1
FBgn0033446	CG1648	CG1648	0.096351	0.0449066	0.296	0.275	1
FBgn0265194	CG44240	Trpm	0.0975306	-0.0178694	0.107	0.118	1
FBgn0027654	CG2239	jdp	0.098017	0.365645	0.498	0.415	1
FBgn0263392	CG43444	Tet	0.0988554	0.202362	0.513	0.503	1
FBgn0040726	CG13439	dpr1	0.0994978	0.115489	0.357	0.317	1
FBgn0033791	CG3915	Drl-2	0.0995911	0.0397774	0.174	0.156	1
FBgn0003435	CG9218	sm	0.101759	1.17907	0.866	0.872	1
FBgn0085382	CG34353	CG34353	0.101864	0.00477569	0.244	0.242	1
FBgn0000633	CG17716	CG17716	0.102291	0.445365	0.529	0.506	1
FBgn0000037	CG4356	mAChR-A	0.103414	0.0746963	0.398	0.39	1
FBgn0032797	CG10186	Hasp	0.104672	0.469191	0.82	0.82	1
FBgn0040805	CG12355	CG12355	0.104697	0.0284285	0.129	0.118	1
FBgn0001186	CG3001	Hex-A	0.106102	1.64621	0.749	0.498	1
FBgn0085390	CG34361	Dgk	0.106235	0.0415147	0.144	0.109	1
FBgn0001091	CG12055	Gapdh1	0.106352	0.0835257	0.421	0.387	1
FBgn0028875	CG32975	nAChRalpha5	0.106873	0.882819	0.817	0.742	1
FBgn0051760	CG31760	CG31760	0.113366	0.0593164	0.141	0.103	1
FBgn0031306	CG4577	CG4577	0.117503	0.0466062	0.158	0.123	1
FBgn0003380	CG12348	Sh	0.118376	1.29486	0.92	0.928	1
FBgn0264490	CG18389	Eip93F	0.122146	0.286745	0.296	0.209	1
FBgn0261928	CG42795	CG42795	0.122154	0.241131	0.414	0.354	1
FBgn0260462	CG12163	CG12163	0.124028	0.0073478	0.149	0.141	1
FBgn0085447	CG34418	sif	0.126973	1.70365	0.786	0.692	1
FBgn0085413	CG34384	CG34384	0.12886	0.15207	0.311	0.237	1
FBgn0027598	CG31012	cindr	0.130849	0.618719	0.673	0.57	1
FBgn0004514	CG7485	Oct-TyrR	0.132002	0.0300079	0.123	0.096	1
FBgn0260943	CG32169	Rbp6	0.133073	3.11198	0.881	0.821	1
FBgn0014163	CG4609	fax	0.133447	0.641515	0.606	0.503	1
FBgn0000108	CG7727	Appl	0.140517	0.762501	0.84	0.836	1
FBgn0262636	CG2052	dati	0.141938	0.362704	0.549	0.488	1
FBgn0267252	CG3694	Ggamma30A	0.142012	2.30055	0.92	0.911	1
FBgn0010411	CG8900	RpS18	0.144223	0.0459143	0.838	0.873	1
FBgn0024963	CG7535	GluClalpha	0.144708	0.876343	0.708	0.663	1
FBgn0002643	CG8118	mam	0.145662	0.0213891	0.237	0.228	1
FBgn0052017	CG32017	CG32017	0.154018	0.0769375	0.336	0.327	1
FBgn0001225	CG4183	Hsp26	0.154956	0.00624976	0.128	0.115	1
FBgn0259242	CG42340	CG42340	0.155195	0.0823976	0.245	0.2	1
FBgn0033544	CG7220	CG7220	0.157919	0.0630241	0.227	0.184	1
FBgn0085412	CG34383	kmr	0.159192	0.160674	0.346	0.284	1
FBgn0086680	CG10037	vvl	0.159723	0.171692	0.24	0.215	1
FBgn0030174	CG15312	CG15312	0.160784	0.0572105	0.249	0.208	1
FBgn0013433	CG4846	beat-Ia	0.162748	-0.000511413	0.164	0.161	1
FBgn0038494	CG4135	beat-IIb	0.164579	0.0524499	0.154	0.126	1
FBgn0033249	CG11191	CG11191	0.1702	-0.011755	0.135	0.152	1
FBgn0004242	CG3139	Syt1	0.170982	0.961915	0.855	0.875	1
FBgn0262737	CG7437	mub	0.172456	0.834024	0.702	0.672	1
FBgn0261999	CG42817	Ca-Ma2d	0.174076	0.0439289	0.171	0.159	1
FBgn0033196	CG1358	CG1358	0.174478	0.0212236	0.105	0.084	1
FBgn0024944	CG3856	Oamb	0.175967	0.0547437	0.13	0.1	1
FBgn0265487	CG33197	mbl	0.177247	1.45074	0.737	0.728	1
FBgn0262160	CG9932	CG9932	0.178852	0.182003	0.335	0.242	1
FBgn0010114	CG2040	hig	0.179125	0.368826	0.613	0.583	1
FBgn0086778	CG32538	nAChRalpha7	0.18018	0.573993	0.643	0.576	1
FBgn0032833	CG10664	COX4	0.183462	0.300936	0.875	0.867	1
FBgn0028704	CG18660	Nckx30C	0.183961	0.494243	0.774	0.759	1
FBgn0016797	CG9739	fz2	0.187277	0.0458241	0.263	0.25	1
FBgn0284243	CG9277	betaTub56D	0.187737	0.533298	0.556	0.445	1
FBgn0004910	CG15855	Eip63F-1	0.189613	0.048682	0.17	0.133	1
FBgn0023534	CG17778	CG17778	0.19009	0.0605272	0.214	0.173	1
FBgn0261565	CG42679	Lmpt	0.196082	0.0612567	0.115	0.079	1
FBgn0250910	CG42244	Octbeta3R	0.198127	-0.00455007	0.165	0.174	1
FBgn0053202	CG33202	dpr11	0.200905	0.0636709	0.264	0.228	1
FBgn0263980	CG43729	Stacl	0.209718	0.564374	0.581	0.513	1
FBgn0013981	CG3379	His4r	0.213177	0.7383	0.939	0.932	1
FBgn0015519	CG2302	nAChRalpha3	0.214189	0.0946941	0.361	0.328	1
FBgn0019650	CG11186	toy	0.214803	-0.0137254	0.25	0.29	1
FBgn0259212	CG42312	cno	0.22092	0.0120633	0.142	0.131	1
FBgn0265296	CG42256	Dscam2	0.222671	0.614793	0.762	0.749	1
FBgn0263995	CG43738	cpo	0.22784	0.700237	0.826	0.833	1
FBgn0085414	CG34385	dpr12	0.231964	0.111127	0.348	0.3	1
FBgn0028645	CG7644	beat-Ib	0.235683	0.0742977	0.267	0.225	1
FBgn0000028	CG9151	acj6	0.236154	0.48524	0.341	0.306	1
FBgn0000635	CG3665	Fas2	0.238097	0.313962	0.306	0.197	1
FBgn0004516	CG14994	Gad1	0.240353	0.0844433	0.111	0.063	1
FBgn0031770	CG13995	CG13995	0.241251	0.0507201	0.178	0.149	1
FBgn0034753	CG2852	CG2852	0.241597	0.115707	0.454	0.401	1
FBgn0261574	CG7749	kug	0.243734	0.0167563	0.205	0.189	1
FBgn0039089	CG10152	beat-IV	0.244058	-0.00981461	0.218	0.227	1
FBgn0052647	CG32647	CG32647	0.24518	0.162441	0.368	0.311	1
FBgn0262593	CG43128	Shab	0.246479	0.27887	0.511	0.485	1
FBgn0000116	CG32031	Argk	0.256035	0.204919	0.803	0.804	1
FBgn0016061	CG31062	side	0.256604	0.178814	0.421	0.35	1
FBgn0266871	CR45332	lncRNA:CR45332	0.257565	-0.044523	0.17	0.188	1
FBgn0037153	CG12673	olf413	0.262674	0.0894747	0.316	0.279	1
FBgn0003423	CG1417	slgA	0.268595	0.203046	0.514	0.488	1
FBgn0267001	CG42338	Ten-a	0.270532	1.82421	0.905	0.815	1
FBgn0085753	CR40596	28SrRNA-Psi:CR40596	0.270759	0.0203211	0.18	0.171	1
FBgn0264001	CG43744	bru3	0.271187	0.364389	0.509	0.452	1
FBgn0011661	CG10701	Moe	0.272017	0.0511037	0.191	0.167	1
FBgn0032151	CG4128	nAChRalpha6	0.274225	1.44513	0.762	0.664	1
FBgn0259170	CG42275	alpha-Man-Ia	0.274538	0.00492611	0.231	0.225	1
FBgn0261788	CG42734	Ank2	0.28029	0.954883	0.843	0.789	1
FBgn0004509	CG10772	Fur1	0.282894	0.00292558	0.195	0.212	1
FBgn0264908	CG44099	pHCl-1	0.284082	0.10866	0.361	0.309	1
FBgn0085421	CG34392	Epac	0.291672	0.0764261	0.204	0.165	1
FBgn0023179	CG6438	amon	0.298417	0.223247	0.385	0.292	1
FBgn0042696	CG2380	NfI	0.299057	0.083631	0.254	0.207	1
FBgn0086677	CG30040	jeb	0.300763	0.362471	0.474	0.411	1
FBgn0261988	CG17998	Gprk2	0.302162	0.316482	0.48	0.37	1
FBgn0038826	CG17838	Syp	0.305332	0.523777	0.655	0.579	1
FBgn0040397	CG3655	CG3655	0.305734	0.0490655	0.169	0.142	1
FBgn0036935	CG14186	CG14186	0.315153	0.0390479	0.153	0.119	1
FBgn0259789	CG12701	zld	0.327478	0.0683864	0.236	0.202	1
FBgn0030090	CG12664	fend	0.327996	0.247238	0.54	0.468	1
FBgn0051721	CG31721	Trim9	0.331413	0.0398977	0.136	0.105	1
FBgn0085383	CG34354	CG34354	0.334776	0.0812093	0.358	0.332	1
FBgn0035499	CG14996	Chd64	0.337872	0.0219231	0.122	0.108	1
FBgn0001085	CG17697	fz	0.343205	0.0393562	0.172	0.145	1
FBgn0261113	CG17836	Xrp1	0.348453	0.0442748	0.192	0.175	1
FBgn0000273	CG4379	Pka-C1	0.348692	0.429737	0.595	0.541	1
FBgn0039380	CG5890	CG5890	0.350281	-0.00454255	0.237	0.244	1
FBgn0019643	CG3318	AANAT1	0.359206	0.00349716	0.193	0.184	1
FBgn0011656	CG1429	Mef2	0.359884	0.101252	0.273	0.208	1
FBgn0250908	CG42242	beat-VII	0.360743	0.0829692	0.208	0.161	1
FBgn0015609	CG7100	CadN	0.363425	0.219283	0.508	0.441	1
FBgn0264386	CG15899	Ca-alpha1T	0.36371	0.523657	0.42	0.324	1
FBgn0261089	CG5559	Sytalpha	0.369312	-0.0195315	0.133	0.151	1
FBgn0263257	CG43395	Cngl	0.370406	0.884067	0.713	0.634	1
FBgn0031897	CG13784	CG13784	0.371468	0.0645508	0.279	0.254	1
FBgn0052600	CG32600	dpr8	0.371947	0.196217	0.39	0.315	1
FBgn0031294	CG31795	IA-2	0.376206	2.70294	0.918	0.923	1
FBgn0010452	CG11280	trn	0.377645	0.152401	0.201	0.173	1
FBgn0086359	CG3953	Invadolysin	0.385238	0.0383108	0.144	0.122	1
FBgn0039617	CG14521	DIP-gamma	0.385932	0.00147407	0.134	0.126	1
FBgn0001233	CG1242	Hsp83	0.386313	0.0987478	0.661	0.654	1
FBgn0011224	CG31000	heph	0.38705	0.564494	0.437	0.328	1
FBgn0262018	CG42829	CadN2	0.387376	0.00801715	0.135	0.145	1
FBgn0265002	CG44153	CG44153	0.389432	0.024262	0.159	0.154	1
FBgn0052432	CG32432	CG32432	0.389762	0.073854	0.335	0.292	1
FBgn0039419	CG12290	CG12290	0.39002	0.0215019	0.113	0.093	1
FBgn0033250	CG14762	CG14762	0.393785	0.128921	0.42	0.409	1
FBgn0015399	CG12283	kek1	0.396717	0.205964	0.506	0.44	1
FBgn0039349	CG4685	Ssadh	0.400806	0.0201406	0.192	0.19	1
FBgn0011666	CG5099	msi	0.405893	0.799662	0.598	0.457	1
FBgn0050158	CG30158	CG30158	0.406539	-0.0188546	0.094	0.113	1
FBgn0032901	CG9339	sky	0.406595	0.115376	0.408	0.356	1
FBgn0035032	CG4692	ATPsynF	0.406765	0.465017	0.844	0.84	1
FBgn0028888	CG4168	CG4168	0.412114	0.0393938	0.178	0.15	1
FBgn0038246	CG14853	CG14853	0.420799	0.0238709	0.183	0.168	1
FBgn0285944	CG9907	para	0.424959	1.02909	0.881	0.907	1
FBgn0261555	CG42673	CG42673	0.425809	-0.0103486	0.133	0.136	1
FBgn0004244	CG10537	Rdl	0.42771	1.35174	0.945	0.935	1
FBgn0034731	CG10384	CG10384	0.42969	0.0330613	0.162	0.135	1
FBgn0267336	CG34360	Glut4EF	0.434407	0.953003	0.788	0.755	1
FBgn0083950	CG34114	side-VI	0.434705	0.447065	0.556	0.462	1
FBgn0267579	CR45919	lncRNA:CR45919	0.435508	0.0134095	0.122	0.102	1
FBgn0023095	CG11282	caps	0.439349	0.0248637	0.164	0.151	1
FBgn0039064	CG4467	CG4467	0.440004	0.201767	0.509	0.503	1
FBgn0041707	CG1168	7B2	0.444015	0.229933	0.661	0.625	1
FBgn0038653	CG18208	Octalpha2R	0.448267	0.0473207	0.263	0.27	1
FBgn0013954	CG11001	Fkbp12	0.448591	0.151168	0.442	0.382	1
FBgn0051774	CG31774	fred	0.459546	0.045809	0.219	0.191	1
FBgn0031835	CG11319	CG11319	0.462356	0.0975445	0.341	0.318	1
FBgn0003165	CG9755	pum	0.470866	0.659918	0.842	0.793	1
FBgn0052677	CG32677	X11Lbeta	0.471416	0.216696	0.423	0.346	1
FBgn0002868	CG9470	MtnA	0.472797	0.375918	0.366	0.193	1
FBgn0037874	CG4800	Tctp	0.473353	0.0198248	0.381	0.375	1
FBgn0003326	CG17579	sca	0.474046	0.00127101	0.105	0.104	1
FBgn0286778	CG46385	CG46385	0.483093	0.0957019	0.305	0.267	1
FBgn0270928	CG32848	VAChT	0.483118	0.299432	0.704	0.718	1
FBgn0285952	CG3186	eEF5	0.483982	0.0965893	0.325	0.272	1
FBgn0085432	CG34403	pan	0.488112	0.27975	0.696	0.685	1
FBgn0038237	CG8279	Pde6	0.489201	0.489129	0.627	0.534	1
FBgn0030412	CG17762	Tomosyn	0.492706	0.395157	0.619	0.536	1
FBgn0038282	CG33485	dpr9	0.495584	0.530546	0.495	0.396	1
FBgn0034725	CG6044	CG6044	0.496368	0.063182	0.439	0.409	1
FBgn0031374	CG7337	Wdr62	0.501976	0.416034	0.552	0.443	1
FBgn0264895	CG44086	RapGAP1	0.505125	0.310337	0.482	0.377	1
FBgn0052062	CG32062	Rbfox1	0.507184	1.56849	0.879	0.858	1
FBgn0267253	CG32700	CG32700	0.514225	0.0941075	0.241	0.192	1
FBgn0037941	CG12594	CG12594	0.518873	0.0523371	0.153	0.133	1
FBgn0259234	CG42332	Camta	0.521685	0.0328131	0.332	0.314	1
FBgn0026428	CG6170	HDAC6	0.52416	0.0306547	0.107	0.083	1
FBgn0261836	CG42768	Msp300	0.525929	1.18403	0.833	0.79	1
FBgn0052264	CG32264	CG32264	0.528969	0.553898	0.738	0.707	1
FBgn0051221	CG31221	CG31221	0.531068	4.03049	0.84	0.8	1
FBgn0038087	CG10134	beat-Va	0.534204	0.0169067	0.181	0.171	1
FBgn0243486	CG15151	rdo	0.537314	-0.00851352	0.107	0.119	1
FBgn0022382	CG15862	Pka-R2	0.537517	0.176144	0.384	0.306	1
FBgn0030723	CG14948	dpr18	0.543091	0.0144324	0.104	0.096	1
FBgn0000024	CG17907	Ace	0.544328	0.497296	0.678	0.668	1
FBgn0036927	CG7433	Gabat	0.546146	0.049404	0.312	0.3	1
FBgn0014184	CG16747	Oda	0.557698	0.524183	0.732	0.7	1
FBgn0038084	CG14390	beat-Vc	0.55878	0.0461851	0.161	0.141	1
FBgn0053543	CG33543	CG33543	0.559023	0.442237	0.393	0.294	1
FBgn0034286	CG33996	dpr13	0.561795	0.249088	0.415	0.38	1
FBgn0264087	CG43756	Slob	0.56723	0.0567443	0.244	0.222	1
FBgn0003429	CG10693	slo	0.568547	0.381476	0.701	0.694	1
FBgn0085407	CG34378	Pvf3	0.570969	0.343376	0.469	0.405	1
FBgn0264975	CG1634	Nrg	0.577018	0.0839695	0.278	0.261	1
FBgn0050089	CG30089	CG30089	0.577745	0.00992742	0.105	0.1	1
FBgn0000422	CG10697	Ddc	0.578969	0.0768247	0.294	0.264	1
FBgn0000659	CG10002	fkh	0.579895	0.282886	0.293	0.271	1
FBgn0036165	CG7533	chrb	0.58398	0.529214	0.703	0.648	1
FBgn0010313	CG2530	corto	0.587695	0.186575	0.418	0.361	1
FBgn0003091	CG6622	Pkc53E	0.590702	0.488241	0.508	0.408	1
FBgn0000535	CG10952	eag	0.596126	0.0661527	0.39	0.356	1
FBgn0259108	CG34387	futsch	0.606774	2.69257	0.964	0.962	1
FBgn0000042	CG4027	Act5C	0.609589	0.324597	0.641	0.654	1
FBgn0010412	CG4464	RpS19a	0.619014	0.0670252	0.326	0.299	1
FBgn0027356	CG8604	Amph	0.621518	0.0252924	0.156	0.138	1
FBgn0020907	CG14904	Scp2	0.625042	0.112029	0.19	0.169	1
FBgn0038839	CG10830	Ktl	0.633006	0.0381679	0.244	0.214	1
FBgn0036494	CG7250	Toll-6	0.639768	0.499929	0.479	0.352	1
FBgn0261556	CG42674	CG42674	0.641966	0.196179	0.333	0.289	1
FBgn0260657	CG42540	CG42540	0.646185	0.186275	0.632	0.608	1
FBgn0264308	CG43778	CG43778	0.646316	0.108886	0.334	0.297	1
FBgn0285948	CG15442	RpL27A	0.657662	0.0307449	0.746	0.784	1
FBgn0034636	CG10440	twz	0.657876	0.0155454	0.113	0.104	1
FBgn0033484	CG2269	CG2269	0.664742	0.313519	0.462	0.418	1
FBgn0263289	CG43398	scrib	0.669358	0.0101455	0.21	0.201	1
FBgn0004369	CG11516	Ptp99A	0.669608	0.603407	0.662	0.561	1
FBgn0038063	CG33976	Octbeta2R	0.671735	0.246065	0.407	0.316	1
FBgn0261244	CG33174	inaE	0.678832	0.396465	0.577	0.466	1
FBgn0266801	CG45263	CG45263	0.679358	0.109585	0.484	0.453	1
FBgn0052406	CG32406	PVRAP	0.681931	0.0351371	0.15	0.135	1
FBgn0005636	CG3385	nvy	0.694015	0.0337758	0.132	0.108	1
FBgn0262738	CG3620	norpA	0.69472	0.14033	0.534	0.551	1
FBgn0036043	CG8177	CG8177	0.695291	0.0733652	0.321	0.296	1
FBgn0013686	CR34094	mt:lrRNA	0.698152	-0.483819	0.936	0.963	1
FBgn0004611	CG4574	Plc21C	0.704835	0.22815	0.446	0.362	1
FBgn0013733	CG18076	shot	0.706249	0.0768398	0.337	0.322	1
FBgn0263930	CG4974	dally	0.708108	0.223961	0.34	0.265	1
FBgn0031632	CG15628	CG15628	0.727674	0.622841	0.671	0.658	1
FBgn0265182	CG44247	CG44247	0.728354	0.0298575	0.177	0.153	1
FBgn0264006	CG43749	dysc	0.729966	0.423375	0.77	0.775	1
FBgn0263220	CG43388	Hk	0.732055	0.740383	0.793	0.752	1
FBgn0037521	CG2993	CG2993	0.734642	0.119137	0.397	0.357	1
FBgn0030897	CG5744	Frq1	0.737488	1.00499	0.734	0.637	1
FBgn0086758	CG31666	chinmo	0.73884	0.384658	0.8	0.774	1
FBgn0005775	CG7503	Con	0.743164	0.575535	0.42	0.287	1
FBgn0005771	CG4491	noc	0.751237	0.0141466	0.12	0.111	1
FBgn0036844	CG14080	Mkp3	0.758449	0.346918	0.529	0.428	1
FBgn0034138	CG8332	RpS15	0.759539	0.614026	0.87	0.861	1
FBgn0039647	CG14509	jus	0.773798	0.281788	0.607	0.579	1
FBgn0053147	CG33147	Hs3st-A	0.775859	0.647411	0.798	0.775	1
FBgn0267033	CG45477	mamo	0.779069	0.846591	0.443	0.311	1
FBgn0033358	CG8216	spab	0.781903	0.00124845	0.143	0.127	1
FBgn0024841	CG1963	Pcd	0.797906	0.0246681	0.11	0.102	1
FBgn0051665	CG31665	wry	0.800258	0.561238	0.563	0.451	1
FBgn0000036	CG5610	nAChRalpha1	0.801511	0.157906	0.475	0.45	1
FBgn0266418	CG45058	wake	0.804209	0.00949122	0.15	0.155	1
FBgn0026160	CG7958	tna	0.808733	0.258384	0.443	0.375	1
FBgn0010473	CG15427	tutl	0.81314	0.520566	0.723	0.707	1
FBgn0031736	CG11030	CG11030	0.813309	0.0341293	0.383	0.39	1
FBgn0000064	CG6058	Ald1	0.815862	0.582996	0.709	0.589	1
FBgn0024189	CG33141	sns	0.819437	0.0226526	0.149	0.138	1
FBgn0035170	CG12191	dpr20	0.828126	0.0174181	0.119	0.107	1
FBgn0083975	CG34139	Nlg4	0.836342	0.0256007	0.17	0.161	1
FBgn0010113	CG15532	hdc	0.839983	1.19562	0.752	0.633	1
FBgn0002593	CG4087	RpLP1	0.849522	0.256331	0.748	0.724	1
FBgn0035816	CG13685	CG13685	0.852105	0.00952882	0.15	0.148	1
FBgn0259244	CG42342	CG42342	0.85605	0.261377	0.447	0.392	1
FBgn0260003	CG34157	Dys	0.867442	0.0262325	0.18	0.164	1
FBgn0000303	CG12345	ChAT	0.87256	0.194224	0.486	0.454	1
FBgn0013576	CG32464	mtd	0.893103	0.496717	0.735	0.673	1
FBgn0085434	CG34405	NaCP60E	0.8952	0.758982	0.749	0.69	1
FBgn0039054	CG13830	Cow	0.906914	0.140827	0.588	0.556	1
FBgn0265597	CG44424	rad	0.909875	0.212868	0.294	0.245	1
FBgn0033192	CG2105	Corin	0.911038	0.123754	0.293	0.242	1
FBgn0010415	CG10497	Sdc	0.913252	0.241229	0.606	0.594	1
FBgn0085380	CG34351	CG34351	0.917619	0.00858121	0.129	0.132	1
FBgn0037525	CG17816	CG17816	0.917831	0.305276	0.578	0.52	1
FBgn0259821	CG42402	CG42402	0.92301	0.103749	0.347	0.324	1
FBgn0262869	CG43224	Gfrl	0.931778	0.154086	0.539	0.531	1
FBgn0259111	CG42253	Ndae1	0.932239	0.00917535	0.152	0.146	1
FBgn0039816	CG11317	CG11317	0.934952	0.034949	0.176	0.165	1
FBgn0261258	CG6014	rgn	0.937168	0.104027	0.317	0.301	1
FBgn0267910	CR34335	lncRNA:CR34335	0.939311	16.8891	0.995	0.919	1
FBgn0264000	CG43743	GluRIB	0.940894	0.32495	0.42	0.346	1
FBgn0264574	CG43946	Glut1	0.94124	0.030933	0.369	0.369	1
FBgn0026411	CG11354	Lim1	0.943223	0.28788	0.313	0.296	1
FBgn0013467	CG18285	igl	0.96717	0.516534	0.679	0.649	1
FBgn0262509	CG43079	nrm	0.971995	0.037649	0.225	0.206	1
FBgn0031414	CG33955	eys	0.975291	0.362757	0.459	0.405	1
FBgn0028644	CG4838	beat-Ic	0.976817	0.364562	0.359	0.255	1
FBgn0261552	CG42670	ps	0.986672	1.31689	0.945	0.948	1
FBgn0034978	CG3257	CG3257	0.988372	0.00523446	0.155	0.149	1
FBgn0013688	CR34096	mt:srRNA	0.995235	0.0231565	0.214	0.201	1

## Sheet: Male_C8
FlyBaseID	GeneID	Gene symbol	p_val	avg_diff	pct.1	pct.2	p_val_adj
FBgn0019660	CR32665	lncRNA:roX2	8.0263e-236	-3.60839	0.007	0.918	1.20394e-232
FBgn0004047	CG11129	Yp3	3.90437e-55	0.174742	0.159	0.001	5.85655e-52
FBgn0004652	CG14307	fru	3.12855e-18	0.328697	0.263	0.08	4.69282e-15
FBgn0002940	CG4550	ninaE	1.18304e-16	-0.436003	0.099	0.276	1.77455e-13
FBgn0052982	CG32982	CG32982	2.89161e-16	0.182775	0.218	0.108	4.33742e-13
FBgn0087002	CG11064	apolpp	1.92763e-15	0.0817175	0.16	0.071	2.89145e-12
FBgn0004619	CG8442	GluRIA	1.93058e-14	0.223663	0.216	0.085	2.89587e-11
FBgn0259677	CG42346	CG42346	1.08829e-12	0.0754195	0.18	0.104	1.63244e-09
FBgn0002945	CG11614	nkd	5.0938e-12	0.327077	0.382	0.229	7.6407e-09
FBgn0052057	CG32057	dpr10	7.9118e-12	0.114133	0.238	0.154	1.18677e-08
FBgn0029768	CG16752	SPR	1.27352e-11	0.199132	0.305	0.189	1.91027e-08
FBgn0004595	CG17228	pros	1.44221e-11	3.94127	0.879	0.861	2.16332e-08
FBgn0051690	CG31690	CG31690	2.9338e-11	0.173345	0.178	0.088	4.4007e-08
FBgn0058469	CR40469	lncRNA:CR40469	5.7177e-11	0.067146	0.119	0.06	8.57655e-08
FBgn0002543	CG5481	robo2	8.70407e-11	0.125655	0.142	0.061	1.30561e-07
FBgn0035050	CG4871	SiaT	1.14628e-10	0.0610877	0.225	0.178	1.71942e-07
FBgn0260429	CG42524	CG42524	1.26415e-10	0.0684189	0.124	0.078	1.89623e-07
FBgn0015229	CG6575	glec	1.81508e-10	0.644764	0.499	0.289	2.72262e-07
FBgn0083228	CG5907	Frq2	2.13875e-10	0.340268	0.312	0.175	3.20813e-07
FBgn0052683	CG32683	CG32683	2.28241e-10	0.0479296	0.191	0.137	3.42362e-07
FBgn0051646	CG31646	DIP-theta	2.9522e-10	0.191867	0.117	0.028	4.42831e-07
FBgn0052626	CG32626	AMPdeam	4.83797e-10	0.0754277	0.151	0.09	7.25696e-07
FBgn0040532	CG8369	CG8369	5.25023e-10	0.103058	0.214	0.135	7.87534e-07
FBgn0011693	CG4899	Pdh	5.34728e-10	-0.179461	0.027	0.113	8.02093e-07
FBgn0031738	CG9171	CG9171	6.68903e-10	0.106282	0.207	0.115	1.00335e-06
FBgn0267910	CR34335	lncRNA:CR34335	1.1712e-09	10.6754	0.998	0.974	1.7568e-06
FBgn0052521	CG32521	CG32521	1.50934e-09	0.0236631	0.135	0.105	2.26401e-06
FBgn0283499	CG18402	InR	1.71864e-09	0.0785602	0.211	0.135	2.57797e-06
FBgn0033987	CG12424	ckn	2.01592e-09	0.130978	0.229	0.134	3.02388e-06
FBgn0030258	CG1552	CG1552	3.68463e-09	0.0852632	0.119	0.046	5.52694e-06
FBgn0086604	CG12484	side-VIII	4.57211e-09	0.0829655	0.141	0.068	6.85817e-06
FBgn0001090	CG7088	bnb	5.94869e-09	0.0609885	0.11	0.049	8.92303e-06
FBgn0030158	CG9686	CG9686	6.48585e-09	0.0245805	0.126	0.081	9.72877e-06
FBgn0003499	CG7847	sr	6.48735e-09	0.108753	0.124	0.044	9.73102e-06
FBgn0027339	CG11352	jim	7.07575e-09	1.63771	0.984	0.994	1.06136e-05
FBgn0266801	CG45263	CG45263	7.18554e-09	0.194776	0.169	0.061	1.07783e-05
FBgn0262160	CG9932	CG9932	8.0029e-09	0.174808	0.333	0.228	1.20043e-05
FBgn0260941	CG42318	app	1.33255e-08	0.132953	0.187	0.092	1.99882e-05
FBgn0261260	CG42611	mgl	1.39241e-08	0.0521696	0.135	0.081	2.08861e-05
FBgn0015766	CG10596	Msr-110	1.40045e-08	0.0490288	0.112	0.06	2.10068e-05
FBgn0250867	CG42238	CG42238	1.40993e-08	0.0607571	0.25	0.186	2.1149e-05
FBgn0051163	CG31163	SKIP	1.70443e-08	0.223795	0.211	0.088	2.55664e-05
FBgn0004168	CG16720	5-HT1A	2.39454e-08	0.158286	0.15	0.051	3.59181e-05
FBgn0036789	CG13702	AstC-R2	2.51598e-08	0.0861807	0.106	0.047	3.77397e-05
FBgn0031897	CG13784	CG13784	2.76526e-08	0.0452269	0.259	0.184	4.14789e-05
FBgn0263994	CG43737	CG43737	3.01359e-08	0.301389	0.396	0.237	4.52039e-05
FBgn0011818	CG9884	oaf	4.17895e-08	0.0464997	0.148	0.094	6.26842e-05
FBgn0040765	CG33473	luna	5.82432e-08	0.25136	0.308	0.173	8.73649e-05
FBgn0267253	CG32700	CG32700	6.56645e-08	0.155178	0.25	0.146	9.84968e-05
FBgn0024321	CG8524	NK7.1	7.63633e-08	0.100215	0.214	0.136	0.000114545
FBgn0265595	CG44422	CG44422	8.49823e-08	0.369237	0.44	0.29	0.000127473
FBgn0031424	CG9887	VGlut	8.79919e-08	0.454467	0.223	0.125	0.000131988
FBgn0051324	CG31324	CG31324	8.84347e-08	0.228151	0.346	0.225	0.000132652
FBgn0261285	CG5629	Ppcs	8.94116e-08	0.0962642	0.162	0.082	0.000134117
FBgn0050463	CG30463	Pgant9	1.00241e-07	0.187594	0.22	0.106	0.000150362
FBgn0033403	CG13739	CG13739	1.09099e-07	0.217514	0.166	0.051	0.000163649
FBgn0004573	CG12073	5-HT7	1.1046e-07	0.0508968	0.106	0.061	0.000165691
FBgn0085426	CG34397	Rgk3	1.62581e-07	0.0783453	0.137	0.084	0.000243872
FBgn0087012	CG1056	5-HT2A	1.63301e-07	0.111422	0.2	0.124	0.000244951
FBgn0050361	CG30361	mtt	1.68941e-07	0.0552029	0.178	0.118	0.000253412
FBgn0036801	CG6896	MYPT-75D	2.27739e-07	0.105604	0.139	0.061	0.000341609
FBgn0052066	CG32066	CG32066	2.42063e-07	0.0837094	0.177	0.123	0.000363095
FBgn0260971	CG42594	CG42594	2.84841e-07	0.246847	0.249	0.136	0.000427261
FBgn0015777	CG9261	nrv2	2.92865e-07	0.103794	0.184	0.104	0.000439298
FBgn0013718	CG33991	nuf	3.99287e-07	0.0572857	0.114	0.057	0.00059893
FBgn0031299	CG4629	CG4629	5.14007e-07	0.0869245	0.146	0.088	0.00077101
FBgn0037015	CG13253	cmpy	6.6292e-07	0.0879412	0.16	0.092	0.00099438
FBgn0085413	CG34384	CG34384	7.14592e-07	0.0180841	0.295	0.236	0.00107189
FBgn0085400	CG34371	side-V	8.72285e-07	0.0649393	0.169	0.105	0.00130843
FBgn0037153	CG12673	olf413	9.19926e-07	0.132978	0.22	0.117	0.00137989
FBgn0085382	CG34353	CG34353	9.6139e-07	0.140144	0.252	0.143	0.00144208
FBgn0030272	CG15201	CG15201	1.25721e-06	0.135763	0.193	0.11	0.00188581
FBgn0038542	CG7431	TyrR	1.28596e-06	0.119902	0.218	0.139	0.00192894
FBgn0029824	CG3726	CG3726	1.31139e-06	0.0697248	0.295	0.223	0.00196709
FBgn0263219	CG42330	Dscam4	1.35039e-06	0.141012	0.312	0.211	0.00202559
FBgn0019662	CG8593	qm	1.73368e-06	0.0984214	0.18	0.108	0.00260053
FBgn0035756	CG32381	unc-13-4A	1.96673e-06	0.035474	0.173	0.124	0.0029501
FBgn0261698	CG42732	SLO2	2.20331e-06	0.0866518	0.422	0.334	0.00330496
FBgn0028407	CG8364	Drep3	2.29058e-06	-0.0257129	0.132	0.12	0.00343587
FBgn0031374	CG7337	Wdr62	2.39401e-06	0.332441	0.459	0.344	0.00359102
FBgn0000179	CG3578	bi	2.88124e-06	0.391917	0.314	0.192	0.00432187
FBgn0027598	CG31012	cindr	2.88962e-06	0.477354	0.492	0.3	0.00433443
FBgn0003301	CG9533	rut	3.1433e-06	0.0612365	0.162	0.114	0.00471495
FBgn0261988	CG17998	Gprk2	3.17529e-06	0.291908	0.443	0.308	0.00476294
FBgn0019650	CG11186	toy	3.39544e-06	0.174808	0.202	0.107	0.00509316
FBgn0000567	CG32180	Eip74EF	3.51848e-06	0.0490867	0.148	0.091	0.00527772
FBgn0029663	CG10804	CG10804	3.86084e-06	0.0746012	0.182	0.116	0.00579127
FBgn0259821	CG42402	CG42402	4.96844e-06	0.136491	0.178	0.083	0.00745266
FBgn0053087	CG33087	LRP1	5.84187e-06	0.0464749	0.103	0.055	0.00876281
FBgn0004509	CG10772	Fur1	6.44103e-06	0.0937846	0.112	0.04	0.00966154
FBgn0065099	CR33925	snRNA:7SK	7.21335e-06	1.5697	0.962	0.91	0.01082
FBgn0031770	CG13995	CG13995	7.3669e-06	0.0851889	0.169	0.094	0.0110503
FBgn0264308	CG43778	CG43778	7.66743e-06	0.0355071	0.211	0.154	0.0115011
FBgn0263773	CG43690	fok	7.97623e-06	0.124374	0.373	0.278	0.0119643
FBgn0085384	CG34355	CG34355	8.06743e-06	0.0900405	0.132	0.064	0.0121011
FBgn0000659	CG10002	fkh	8.63581e-06	0.320374	0.344	0.241	0.0129537
FBgn0032629	CG15138	beat-IIIc	9.01216e-06	0.259253	0.386	0.284	0.0135182
FBgn0285963	CG46339	CG46339	9.90522e-06	0.0495826	0.124	0.083	0.0148578
FBgn0028369	CG3653	kirre	1.02429e-05	0.105662	0.38	0.297	0.0153643
FBgn0032666	CG5758	CG5758	1.08265e-05	0.0516406	0.146	0.1	0.0162398
FBgn0264000	CG43743	GluRIB	1.30596e-05	0.28385	0.323	0.172	0.0195894
FBgn0264753	CG44011	Rgk1	1.33569e-05	0.082139	0.16	0.101	0.0200354
FBgn0263930	CG4974	dally	1.37513e-05	0.0518721	0.254	0.195	0.020627
FBgn0264442	CG43860	ab	1.39373e-05	0.0487892	0.148	0.094	0.0209059
FBgn0033268	CG2297	Obp44a	1.4755e-05	0.504157	0.312	0.19	0.0221325
FBgn0028644	CG4838	beat-Ic	1.53483e-05	1.4605	0.65	0.494	0.0230224
FBgn0002868	CG9470	MtnA	1.58031e-05	0.312927	0.387	0.227	0.0237047
FBgn0023534	CG17778	CG17778	1.69643e-05	0.0495661	0.195	0.139	0.0254464
FBgn0028370	CG4192	kek3	1.73627e-05	0.103686	0.209	0.134	0.026044
FBgn0033544	CG7220	CG7220	1.86621e-05	0.0373915	0.144	0.1	0.0279932
FBgn0031971	CG7224	Sirup	1.88214e-05	0.0443425	0.108	0.068	0.0282321
FBgn0000547	CG12676	ed	1.99792e-05	0.153657	0.177	0.094	0.0299688
FBgn0263289	CG43398	scrib	2.10869e-05	-0.0538309	0.153	0.147	0.0316303
FBgn0033159	CG17800	Dscam1	2.21972e-05	0.0400446	0.139	0.103	0.0332959
FBgn0052406	CG32406	PVRAP	2.38654e-05	-0.0173651	0.173	0.141	0.0357981
FBgn0004395	CG4620	unk	2.55437e-05	0.116877	0.263	0.184	0.0383155
FBgn0033108	CG15236	CG15236	2.73713e-05	0.109687	0.157	0.089	0.0410569
FBgn0267322	CR45758	lncRNA:CR45758	2.75365e-05	0.0629308	0.202	0.142	0.0413048
FBgn0004607	CG1449	zfh2	2.76961e-05	0.0830317	0.115	0.061	0.0415441
FBgn0031306	CG4577	CG4577	2.9333e-05	0.0150922	0.198	0.157	0.0439995
FBgn0038980	CG6919	Octbeta1R	3.70233e-05	0.124837	0.121	0.052	0.0555349
FBgn0039209	CG13624	REPTOR	3.70706e-05	0.11434	0.323	0.234	0.0556059
FBgn0261871	CG33507	dpr2	4.35387e-05	0.054302	0.121	0.068	0.065308
FBgn0030090	CG12664	fend	5.55083e-05	0.129159	0.279	0.179	0.0832624
FBgn0036494	CG7250	Toll-6	6.28716e-05	0.276973	0.308	0.175	0.0943074
FBgn0000121	CG5962	Arr2	6.70005e-05	-0.170336	0.112	0.187	0.100501
FBgn0262782	CG5362	Mdh1	6.75719e-05	0.0333333	0.112	0.075	0.101358
FBgn0036935	CG14186	CG14186	7.33804e-05	0.0844037	0.164	0.087	0.110071
FBgn0011666	CG5099	msi	7.38726e-05	0.81596	0.658	0.471	0.110809
FBgn0051361	CG31361	dpr17	7.52876e-05	0.082792	0.166	0.107	0.112931
FBgn0020269	CG10145	mspo	7.78857e-05	0.181643	0.277	0.194	0.116829
FBgn0053143	CG33143	CG33143	9.50654e-05	-0.0527068	0.375	0.348	0.142598
FBgn0283651	CG46301	CG46301	9.8121e-05	0.0687495	0.117	0.063	0.147181
FBgn0051619	CG31619	nolo	9.96859e-05	0.118043	0.285	0.2	0.149529
FBgn0267668	CR46006	lncRNA:CR46006	0.000106711	0.171626	0.368	0.263	0.160066
FBgn0038494	CG4135	beat-IIb	0.000129403	0.0389867	0.263	0.208	0.194105
FBgn0032901	CG9339	sky	0.000130441	0.0149021	0.411	0.343	0.195661
FBgn0031736	CG11030	CG11030	0.000132511	0.0426399	0.108	0.061	0.198767
FBgn0264503	CG43902	CG43902	0.000140741	0.0744442	0.314	0.253	0.211111
FBgn0085395	CG34366	Shawl	0.000142633	0.0258286	0.124	0.086	0.213949
FBgn0037521	CG2993	CG2993	0.000156918	0.0566906	0.378	0.301	0.235376
FBgn0085412	CG34383	kmr	0.000158459	0.108298	0.238	0.171	0.237688
FBgn0004449	CG5723	Ten-m	0.000167744	0.0753203	0.196	0.123	0.251616
FBgn0031016	CG12199	kek5	0.000176162	0.027961	0.11	0.074	0.264243
FBgn0011656	CG1429	Mef2	0.000183761	0.0665262	0.24	0.189	0.275642
FBgn0000633	CG17716	CG17716	0.000184381	0.478188	0.438	0.274	0.276571
FBgn0035041	CG13594	CG13594	0.000194428	0.0428961	0.139	0.085	0.291642
FBgn0016797	CG9739	fz2	0.000195164	0.121729	0.238	0.156	0.292745
FBgn0262738	CG3620	norpA	0.000204142	-0.0572444	0.364	0.378	0.306213
FBgn0033405	CG13954	CG13954	0.000205413	0.161369	0.364	0.293	0.308119
FBgn0085399	CG34370	CG34370	0.000212292	0.039028	0.146	0.099	0.318438
FBgn0029939	CG9650	CG9650	0.000226843	0.221539	0.263	0.167	0.340264
FBgn0053179	CG33179	beat-IIIb	0.000249311	0.0843128	0.256	0.178	0.373966
FBgn0053543	CG33543	CG33543	0.000251407	0.213869	0.31	0.193	0.37711
FBgn0010452	CG11280	trn	0.000265087	0.118985	0.164	0.112	0.39763
FBgn0036725	CG18265	CG18265	0.000285972	0.0327134	0.106	0.067	0.428958
FBgn0066101	CG31094	LpR1	0.000294406	0.0347715	0.247	0.207	0.441608
FBgn0085397	CG34368	Fili	0.000332205	0.153153	0.2	0.132	0.498307
FBgn0000097	CG3166	aop	0.000346083	-0.0245723	0.303	0.264	0.519124
FBgn0052600	CG32600	dpr8	0.000347375	0.19438	0.387	0.302	0.521062
FBgn0264815	CG44007	Pde1c	0.000360674	-0.237805	0.414	0.437	0.541011
FBgn0023179	CG6438	amon	0.000362655	0.150318	0.306	0.203	0.543982
FBgn0015399	CG12283	kek1	0.000399057	0.297983	0.537	0.396	0.598585
FBgn0051092	CG31092	LpR2	0.000420679	0.075717	0.171	0.113	0.631019
FBgn0000636	CG5803	Fas3	0.00043364	0.125093	0.27	0.19	0.65046
FBgn0262614	CG43140	pyd	0.000450386	0.209067	0.166	0.103	0.675579
FBgn0001085	CG17697	fz	0.000462551	-0.022911	0.191	0.172	0.693827
FBgn0016061	CG31062	side	0.00046386	0.116803	0.339	0.256	0.69579
FBgn0052183	CG32183	Ccn	0.000473275	0.053368	0.186	0.136	0.709912
FBgn0004244	CG10537	Rdl	0.000485449	0.459608	0.942	0.975	0.728174
FBgn0030913	CG6123	CG6123	0.000500757	0.0604926	0.115	0.074	0.751135
FBgn0261113	CG17836	Xrp1	0.000530289	0.0568146	0.159	0.106	0.795434
FBgn0015519	CG2302	nAChRalpha3	0.000542512	0.0529217	0.128	0.079	0.813767
FBgn0243512	CG7850	puc	0.000571432	0.060038	0.105	0.056	0.857148
FBgn0038665	CG12269	euc	0.000596239	0.0179354	0.105	0.082	0.894359
FBgn0265598	CG44425	Bx	0.000645304	0.107472	0.119	0.058	0.967956
FBgn0051774	CG31774	fred	0.000693666	0.106207	0.223	0.142	1
FBgn0259789	CG12701	zld	0.000714416	0.0542772	0.2	0.15	1
FBgn0267033	CG45477	mamo	0.000722807	0.265353	0.551	0.531	1
FBgn0037676	CG8861	CG8861	0.000739694	-0.077056	0.234	0.242	1
FBgn0039584	CG14064	beat-VI	0.000740652	0.0640136	0.184	0.125	1
FBgn0266100	CG44837	CG44837	0.000743087	0.0635342	0.151	0.094	1
FBgn0028481	CG4341	CG4341	0.000752415	0.050748	0.16	0.109	1
FBgn0264975	CG1634	Nrg	0.000841529	0.00423175	0.139	0.121	1
FBgn0250869	CG42240	CG42240	0.000856679	0.0366725	0.124	0.092	1
FBgn0260660	CG42543	Mp	0.000861257	-0.0115133	0.422	0.385	1
FBgn0003091	CG6622	Pkc53E	0.000874455	0.467477	0.42	0.237	1
FBgn0011661	CG10701	Moe	0.000891347	0.00276056	0.123	0.106	1
FBgn0085447	CG34418	sif	0.000894143	1.16842	0.641	0.464	1
FBgn0052677	CG32677	X11Lbeta	0.00101191	-0.00152079	0.319	0.296	1
FBgn0013733	CG18076	shot	0.001082	0.067956	0.279	0.218	1
FBgn0261999	CG42817	Ca-Ma2d	0.00115319	0.00957104	0.139	0.118	1
FBgn0267336	CG34360	Glut4EF	0.00120331	0.974279	0.861	0.871	1
FBgn0000116	CG32031	Argk	0.00126458	-0.073783	0.578	0.684	1
FBgn0013995	CG5685	Calx	0.00141437	0.313075	0.425	0.327	1
FBgn0039054	CG13830	Cow	0.00152628	-0.177097	0.472	0.464	1
FBgn0039380	CG5890	CG5890	0.00154961	0.0539301	0.283	0.211	1
FBgn0000635	CG3665	Fas2	0.00162092	0.170039	0.182	0.079	1
FBgn0285952	CG3186	eEF5	0.00166893	0.015712	0.225	0.186	1
FBgn0042696	CG2380	NfI	0.00173354	0.0577734	0.267	0.214	1
FBgn0034286	CG33996	dpr13	0.00173987	0.225002	0.411	0.309	1
FBgn0250908	CG42242	beat-VII	0.00181031	0.0877097	0.263	0.193	1
FBgn0010114	CG2040	hig	0.00193284	0.408059	0.508	0.417	1
FBgn0265487	CG33197	mbl	0.0019472	0.584057	0.333	0.19	1
FBgn0261258	CG6014	rgn	0.00195343	0.0364658	0.272	0.226	1
FBgn0264273	CG33960	Sema2b	0.0019826	0.0694024	0.112	0.062	1
FBgn0259244	CG42342	CG42342	0.00208902	0.118654	0.213	0.128	1
FBgn0284243	CG9277	betaTub56D	0.00226872	0.125076	0.346	0.252	1
FBgn0030574	CG9413	sbm	0.0022895	0.017051	0.11	0.084	1
FBgn0014859	CG1864	Hr38	0.00232723	0.227407	0.281	0.194	1
FBgn0027356	CG8604	Amph	0.00236793	0.0407968	0.148	0.1	1
FBgn0019985	CG11144	mGluR	0.00239069	0.0623523	0.159	0.104	1
FBgn0027589	CG1688	CG1688	0.00239775	-0.0152161	0.196	0.19	1
FBgn0000108	CG7727	Appl	0.00244727	0.140102	0.809	0.907	1
FBgn0000064	CG6058	Ald1	0.0024801	0.199835	0.499	0.391	1
FBgn0266429	CG2872	AstA-R1	0.00251835	0.00974461	0.105	0.088	1
FBgn0261046	CG31190	Dscam3	0.0025454	0.108389	0.238	0.171	1
FBgn0039064	CG4467	CG4467	0.00256109	0.30686	0.474	0.344	1
FBgn0015400	CG4977	kek2	0.00257024	0.0670303	0.272	0.206	1
FBgn0260003	CG34157	Dys	0.00266682	0.00111579	0.153	0.129	1
FBgn0003165	CG9755	pum	0.00268206	0.574213	0.73	0.706	1
FBgn0004198	CG11387	ct	0.00273359	2.16771	0.941	0.902	1
FBgn0052204	CG32204	CG32204	0.00282326	0.0884288	0.166	0.106	1
FBgn0035495	CG14989	CG14989	0.00315757	0.800364	0.505	0.446	1
FBgn0250910	CG42244	Octbeta3R	0.0032281	0.0413588	0.123	0.083	1
FBgn0039232	CG13636	sosie	0.00331727	-0.4596	0.495	0.52	1
FBgn0266851	CR45312	lncRNA:CR45312	0.00368163	0.0361022	0.18	0.135	1
FBgn0028645	CG7644	beat-Ib	0.00375941	0.111365	0.461	0.391	1
FBgn0262737	CG7437	mub	0.00378153	0.439036	0.795	0.822	1
FBgn0261556	CG42674	CG42674	0.00379267	0.143698	0.153	0.086	1
FBgn0044328	CG32052	CG32052	0.00397205	0.0413257	0.119	0.082	1
FBgn0259243	CG42341	Pka-R1	0.00406304	0.0775353	0.225	0.162	1
FBgn0265002	CG44153	CG44153	0.00413377	0.0409455	0.207	0.156	1
FBgn0036844	CG14080	Mkp3	0.00427693	0.328672	0.411	0.275	1
FBgn0030174	CG15312	CG15312	0.00435288	0.0333251	0.141	0.114	1
FBgn0001091	CG12055	Gapdh1	0.00443786	0.0508306	0.24	0.184	1
FBgn0265052	CG44167	St3	0.00451723	-0.0415572	0.211	0.214	1
FBgn0000422	CG10697	Ddc	0.00463893	0.109017	0.231	0.139	1
FBgn0264001	CG43744	bru3	0.00468418	0.349475	0.317	0.181	1
FBgn0038498	CG14334	beat-IIa	0.00473151	0.201413	0.517	0.439	1
FBgn0261928	CG42795	CG42795	0.00506716	0.0152492	0.344	0.3	1
FBgn0041094	CG7590	scyl	0.00520623	0.379726	0.508	0.404	1
FBgn0039420	CG6154	CG6154	0.00523141	0.0167121	0.15	0.13	1
FBgn0260753	CG13758	Pdfr	0.00524313	0.0278535	0.139	0.126	1
FBgn0003274	CG4918	RpLP2	0.0052854	0.0391107	0.476	0.428	1
FBgn0263706	CG43658	CG43658	0.00530407	-0.0243987	0.234	0.234	1
FBgn0033192	CG2105	Corin	0.00535815	0.0990247	0.357	0.274	1
FBgn0085432	CG34403	pan	0.00548091	0.239598	0.741	0.734	1
FBgn0040823	CG14162	dpr6	0.00549016	0.0583271	0.259	0.207	1
FBgn0083963	CG34127	Nlg3	0.00552486	0.284875	0.391	0.245	1
FBgn0052432	CG32432	CG32432	0.0056516	0.0992479	0.285	0.204	1
FBgn0000037	CG4356	mAChR-A	0.00580906	0.0937763	0.276	0.198	1
FBgn0036927	CG7433	Gabat	0.00609662	0.0340359	0.182	0.147	1
FBgn0038246	CG14853	CG14853	0.00640896	0.00222332	0.195	0.163	1
FBgn0039089	CG10152	beat-IV	0.00679142	-2.47954e-05	0.119	0.111	1
FBgn0262473	CG5490	Tl	0.00829578	0.128597	0.285	0.217	1
FBgn0001078	CG4059	ftz-f1	0.00835978	0.177387	0.456	0.369	1
FBgn0002643	CG8118	mam	0.00849623	0.0227044	0.159	0.126	1
FBgn0052206	CG32206	CG32206	0.0086455	0.0417473	0.272	0.218	1
FBgn0053517	CG33517	Dop2R	0.00873086	0.679759	0.964	0.978	1
FBgn0019643	CG3318	AANAT1	0.00885928	0.0392512	0.162	0.123	1
FBgn0013686	CR34094	mt:lrRNA	0.00892551	-0.509414	0.951	0.976	1
FBgn0036144	CG6207	GlcAT-P	0.00948567	0.0198859	0.164	0.149	1
FBgn0260793	CG42573	2mit	0.00952488	0.0208116	0.126	0.1	1
FBgn0259171	CG42276	Pde9	0.00978327	0.05374	0.524	0.504	1
FBgn0034753	CG2852	CG2852	0.0103561	0.063435	0.259	0.217	1
FBgn0261262	CG42613	CG42613	0.0117789	0.485784	0.443	0.265	1
FBgn0038063	CG33976	Octbeta2R	0.0123417	0.146872	0.402	0.294	1
FBgn0027654	CG2239	jdp	0.0125821	0.311836	0.413	0.304	1
FBgn0031835	CG11319	CG11319	0.0137513	-0.0284982	0.355	0.315	1
FBgn0085421	CG34392	Epac	0.0140092	-0.0402843	0.323	0.297	1
FBgn0265182	CG44247	CG44247	0.0143745	0.049376	0.157	0.117	1
FBgn0003423	CG1417	slgA	0.0147305	0.00628151	0.312	0.27	1
FBgn0263397	CG8585	Ih	0.0153606	1.11646	0.782	0.769	1
FBgn0035499	CG14996	Chd64	0.0158165	0.0147202	0.128	0.1	1
FBgn0053147	CG33147	Hs3st-A	0.0159502	0.423167	0.667	0.585	1
FBgn0010113	CG15532	hdc	0.0159662	0.575362	0.405	0.227	1
FBgn0262018	CG42829	CadN2	0.0162806	0.0171089	0.141	0.116	1
FBgn0037913	CG6783	fabp	0.0163523	-0.0201091	0.115	0.106	1
FBgn0284245	CG8280	eEF1alpha1	0.0166197	0.00262832	0.249	0.223	1
FBgn0086778	CG32538	nAChRalpha7	0.0166452	0.584577	0.521	0.397	1
FBgn0001186	CG3001	Hex-A	0.0168524	0.885817	0.546	0.364	1
FBgn0039349	CG4685	Ssadh	0.017061	0.027961	0.108	0.076	1
FBgn0286778	CG46385	CG46385	0.0190786	0.105405	0.267	0.194	1
FBgn0022382	CG15862	Pka-R2	0.0204066	0.0563187	0.297	0.23	1
FBgn0000028	CG9151	acj6	0.0204717	0.54026	0.544	0.472	1
FBgn0262593	CG43128	Shab	0.0207529	0.11839	0.411	0.347	1
FBgn0001234	CR31400	lncRNA:Hsromega	0.0209728	-0.0658071	0.959	0.981	1
FBgn0263997	CG43740	CG43740	0.0211949	0.0207786	0.151	0.113	1
FBgn0033484	CG2269	CG2269	0.0212403	0.292652	0.523	0.51	1
FBgn0015774	CG10521	NetB	0.021882	0.0439788	0.211	0.189	1
FBgn0028704	CG18660	Nckx30C	0.0231109	0.146913	0.73	0.78	1
FBgn0038839	CG10830	Ktl	0.0247096	-0.0694438	0.213	0.212	1
FBgn0036454	CG17839	CG17839	0.0250022	0.0122903	0.267	0.236	1
FBgn0039938	CG11153	Sox102F	0.0254137	0.0510207	0.124	0.083	1
FBgn0034808	CG9896	CG9896	0.0257552	-0.0572279	0.384	0.35	1
FBgn0085753	CR40596	28SrRNA-Psi:CR40596	0.0258051	0.0235887	0.168	0.138	1
FBgn0026199	CG1838	myo	0.0288246	0.0233738	0.105	0.083	1
FBgn0052506	CG32506	CG32506	0.0288649	-0.0520043	0.31	0.308	1
FBgn0085391	CG34362	trv	0.029263	0.875915	0.8	0.717	1
FBgn0030723	CG14948	dpr18	0.0311403	0.026341	0.171	0.137	1
FBgn0039647	CG14509	jus	0.0319166	0.134738	0.306	0.221	1
FBgn0285948	CG15442	RpL27A	0.0358346	-0.340747	0.703	0.799	1
FBgn0028875	CG32975	nAChRalpha5	0.0369836	0.516415	0.454	0.328	1
FBgn0261953	CG7807	TfAP-2	0.0374981	-0.00864534	0.139	0.132	1
FBgn0034138	CG8332	RpS15	0.0386687	-0.102529	0.762	0.872	1
FBgn0034725	CG6044	CG6044	0.0399536	-0.0119431	0.218	0.205	1
FBgn0052062	CG32062	Rbfox1	0.0405492	0.544376	0.827	0.887	1
FBgn0000303	CG12345	ChAT	0.0406947	0.018018	0.267	0.259	1
FBgn0032151	CG4128	nAChRalpha6	0.0429491	2.1313	0.773	0.729	1
FBgn0261588	CG42698	pdm3	0.0430896	0.0288206	0.256	0.248	1
FBgn0041707	CG1168	7B2	0.0439653	0.0481197	0.523	0.494	1
FBgn0031632	CG15628	CG15628	0.0444429	0.117894	0.422	0.336	1
FBgn0003997	CG5123	hid	0.0444528	0.042863	0.119	0.096	1
FBgn0051665	CG31665	wry	0.0445737	0.314613	0.395	0.276	1
FBgn0013981	CG3379	His4r	0.0496999	0.161509	0.908	0.951	1
FBgn0010415	CG10497	Sdc	0.0523892	-0.0556906	0.569	0.554	1
FBgn0264087	CG43756	Slob	0.0525531	-0.0419043	0.277	0.265	1
FBgn0264606	CG43955	Fife	0.0535237	0.114282	0.369	0.279	1
FBgn0014184	CG16747	Oda	0.0541464	-0.00587652	0.514	0.505	1
FBgn0032797	CG10186	Hasp	0.0547813	0.337003	0.623	0.682	1
FBgn0029922	CG14431	CG14431	0.0556351	0.0134722	0.133	0.113	1
FBgn0083949	CG34113	side-III	0.0566578	0.351682	0.69	0.614	1
FBgn0030432	CG4404	CG4404	0.057226	0.00276056	0.128	0.107	1
FBgn0264908	CG44099	pHCl-1	0.0603791	-0.102587	0.369	0.375	1
FBgn0004611	CG4574	Plc21C	0.0604963	0.151054	0.35	0.263	1
FBgn0036773	CG13698	CG13698	0.0612932	0.0212332	0.151	0.125	1
FBgn0264006	CG43749	dysc	0.062334	0.278403	0.724	0.741	1
FBgn0267252	CG3694	Ggamma30A	0.0631279	1.34997	0.84	0.876	1
FBgn0033250	CG14762	CG14762	0.0644638	0.126622	0.411	0.337	1
FBgn0264895	CG44086	RapGAP1	0.0699638	0.368369	0.503	0.375	1
FBgn0031294	CG31795	IA-2	0.0709119	1.39943	0.978	0.981	1
FBgn0030505	CG11172	NFAT	0.0718929	0.108505	0.308	0.25	1
FBgn0038237	CG8279	Pde6	0.0754617	0.263617	0.378	0.252	1
FBgn0035032	CG4692	ATPsynF	0.0776022	0.0465576	0.58	0.661	1
FBgn0001233	CG1242	Hsp83	0.0797091	-0.0803455	0.456	0.42	1
FBgn0010263	CG3151	Rbp9	0.0813258	0.236201	0.418	0.322	1
FBgn0263353	CG11000	CG11000	0.0825724	0.149822	0.535	0.482	1
FBgn0264386	CG15899	Ca-alpha1T	0.0832998	0.477568	0.497	0.406	1
FBgn0261552	CG42670	ps	0.0836812	0.253575	0.883	0.955	1
FBgn0023172	CG9635	RhoGEF2	0.0840505	0.0452599	0.105	0.072	1
FBgn0024732	CG8357	Drep1	0.0847185	-0.000314076	0.106	0.094	1
FBgn0083975	CG34139	Nlg4	0.0857453	0.0278453	0.186	0.149	1
FBgn0085409	CG34380	smal	0.0908673	0.0579387	0.236	0.201	1
FBgn0038282	CG33485	dpr9	0.0933095	0.431647	0.445	0.332	1
FBgn0027608	CG2082	CG2082	0.095173	0.118613	0.411	0.35	1
FBgn0287186	CG17594	scro	0.0993874	0.0662369	0.501	0.445	1
FBgn0032840	CG13968	sNPF	0.100943	0.144285	0.222	0.167	1
FBgn0261244	CG33174	inaE	0.102474	0.204554	0.414	0.341	1
FBgn0265597	CG44424	rad	0.10314	0.268055	0.297	0.172	1
FBgn0259242	CG42340	CG42340	0.105888	0.0561451	0.198	0.157	1
FBgn0262509	CG43079	nrm	0.109798	0.0314571	0.231	0.187	1
FBgn0003435	CG9218	sm	0.110223	0.464609	0.787	0.877	1
FBgn0003360	CG16944	sesB	0.111865	-0.229887	0.647	0.85	1
FBgn0033438	CG1794	Mmp2	0.115876	-0.151525	0.339	0.365	1
FBgn0066084	CG30425	RpL41	0.116284	1.69448	0.804	0.69	1
FBgn0010313	CG2530	corto	0.116558	0.00491776	0.25	0.218	1
FBgn0261089	CG5559	Sytalpha	0.118096	-0.0401438	0.195	0.189	1
FBgn0259108	CG34387	futsch	0.121169	0.53397	0.832	0.875	1
FBgn0037874	CG4800	Tctp	0.125278	-0.183809	0.378	0.41	1
FBgn0085414	CG34385	dpr12	0.125445	0.0249111	0.328	0.312	1
FBgn0264490	CG18389	Eip93F	0.12625	0.348558	0.38	0.25	1
FBgn0000273	CG4379	Pka-C1	0.128552	0.169278	0.578	0.528	1
FBgn0000036	CG5610	nAChRalpha1	0.137114	0.0403835	0.375	0.321	1
FBgn0270928	CG32848	VAChT	0.138196	-0.0146045	0.589	0.572	1
FBgn0085380	CG34351	CG34351	0.139779	0.00439706	0.128	0.113	1
FBgn0250839	CG2016	CG2016	0.140952	0.0968758	0.137	0.096	1
FBgn0004880	CG1130	scrt	0.1437	0.310241	0.886	0.95	1
FBgn0036043	CG8177	CG8177	0.14726	0.0599719	0.232	0.181	1
FBgn0085383	CG34354	CG34354	0.148677	0.0902802	0.328	0.277	1
FBgn0004858	CG4220	elB	0.153146	0.0283164	0.121	0.1	1
FBgn0013954	CG11001	Fkbp12	0.158466	0.0420283	0.405	0.359	1
FBgn0261549	CG42667	rdgA	0.15916	-0.0940326	0.555	0.531	1
FBgn0037956	CG6959	CG6959	0.169736	-0.00401686	0.105	0.099	1
FBgn0085370	CG34341	Pde11	0.178935	0.0201918	0.112	0.098	1
FBgn0024963	CG7535	GluClalpha	0.1826	0.462906	0.636	0.561	1
FBgn0052017	CG32017	CG32017	0.18377	0.114414	0.348	0.276	1
FBgn0264574	CG43946	Glut1	0.184706	-0.00926523	0.362	0.327	1
FBgn0015609	CG7100	CadN	0.201032	0.152475	0.393	0.32	1
FBgn0010300	CG10719	brat	0.204884	0.0333581	0.252	0.223	1
FBgn0005775	CG7503	Con	0.214218	1.23465	0.811	0.729	1
FBgn0261804	CG42750	CG42750	0.218565	0.135333	0.306	0.242	1
FBgn0260658	CG42541	CG42541	0.220327	-0.317547	0.695	0.661	1
FBgn0053202	CG33202	dpr11	0.221507	0.00371105	0.123	0.105	1
FBgn0052647	CG32647	CG32647	0.235786	0.00566989	0.272	0.26	1
FBgn0259213	CG42313	side-II	0.249013	-0.0193074	0.506	0.488	1
FBgn0004580	CG6702	Cbp53E	0.249136	1.9564	0.838	0.77	1
FBgn0020907	CG14904	Scp2	0.264484	0.0207703	0.146	0.133	1
FBgn0263980	CG43729	Stacl	0.265975	0.0179106	0.643	0.616	1
FBgn0004242	CG3139	Syt1	0.266754	0.219225	0.76	0.888	1
FBgn0033196	CG1358	CG1358	0.268663	-0.0233986	0.173	0.161	1
FBgn0037976	CG14734	Tk	0.269147	-0.0906108	0.285	0.295	1
FBgn0261597	CG10305	RpS26	0.2718	-0.292289	0.699	0.848	1
FBgn0261574	CG7749	kug	0.274602	0.0271014	0.142	0.119	1
FBgn0051221	CG31221	CG31221	0.280167	2.67808	0.932	0.934	1
FBgn0029814	CG15765	CG15765	0.283537	0.120506	0.477	0.44	1
FBgn0013973	CG1470	Gycbeta100B	0.297382	-0.00264485	0.119	0.106	1
FBgn0011224	CG31000	heph	0.299169	0.600264	0.724	0.632	1
FBgn0010473	CG15427	tutl	0.300677	0.12887	0.611	0.572	1
FBgn0024189	CG33141	sns	0.300677	-0.00726506	0.123	0.117	1
FBgn0028496	CG30116	CG30116	0.305551	0.139598	0.259	0.208	1
FBgn0085369	CG34340	Drgx	0.30688	-0.0148607	0.086	0.103	1
FBgn0010411	CG8900	RpS18	0.310262	-0.300264	0.733	0.886	1
FBgn0013433	CG4846	beat-Ia	0.326184	0.00954624	0.169	0.146	1
FBgn0085387	CG34358	shakB	0.360099	0.192933	0.391	0.291	1
FBgn0033356	CG8229	CG8229	0.362218	-0.0279362	0.105	0.12	1
FBgn0014163	CG4609	fax	0.363568	0.506034	0.519	0.361	1
FBgn0263220	CG43388	Hk	0.373438	0.378023	0.739	0.687	1
FBgn0023095	CG11282	caps	0.373796	-0.0223076	0.133	0.13	1
FBgn0052264	CG32264	CG32264	0.376045	0.279982	0.643	0.578	1
FBgn0013576	CG32464	mtd	0.38411	0.298901	0.537	0.477	1
FBgn0004635	CG1004	rho	0.386071	0.00584346	0.105	0.095	1
FBgn0037525	CG17816	CG17816	0.387709	0.206761	0.389	0.29	1
FBgn0085407	CG34378	Pvf3	0.401848	0.387982	0.553	0.461	1
FBgn0000575	CG1007	emc	0.422878	-0.0131003	0.447	0.425	1
FBgn0086677	CG30040	jeb	0.427474	0.271775	0.416	0.293	1
FBgn0003380	CG12348	Sh	0.430878	0.598917	0.894	0.943	1
FBgn0032400	CG6770	CG6770	0.431533	0.508141	0.717	0.61	1
FBgn0004516	CG14994	Gad1	0.431935	0.0803124	0.119	0.065	1
FBgn0004369	CG11516	Ptp99A	0.452591	0.580734	0.631	0.529	1
FBgn0259234	CG42332	Camta	0.452592	0.00274403	0.191	0.174	1
FBgn0083950	CG34114	side-VI	0.462374	0.31834	0.476	0.399	1
FBgn0034731	CG10384	CG10384	0.476786	-0.0153153	0.187	0.183	1
FBgn0040726	CG13439	dpr1	0.494605	0.100413	0.497	0.461	1
FBgn0030412	CG17762	Tomosyn	0.511435	0.288611	0.521	0.417	1
FBgn0029123	CG18024	SoxN	0.521372	0.32239	0.49	0.449	1
FBgn0001235	CG17117	hth	0.530877	0.153112	0.317	0.257	1
FBgn0029897	CG3203	RpL17	0.55155	-0.0561865	0.566	0.538	1
FBgn0041605	CG32490	cpx	0.563692	0.488817	0.968	0.987	1
FBgn0263392	CG43444	Tet	0.565526	0.0235061	0.663	0.636	1
FBgn0261788	CG42734	Ank2	0.567884	0.367039	0.641	0.664	1
FBgn0031697	CG14024	CG14024	0.572729	0.0297215	0.133	0.118	1
FBgn0267001	CG42338	Ten-a	0.574874	1.24168	0.827	0.789	1
FBgn0086758	CG31666	chinmo	0.592338	0.239788	0.676	0.603	1
FBgn0285944	CG9907	para	0.595899	0.275304	0.773	0.883	1
FBgn0265296	CG42256	Dscam2	0.667797	0.53378	0.744	0.71	1
FBgn0259170	CG42275	alpha-Man-Ia	0.679274	0.00461195	0.301	0.288	1
FBgn0000042	CG4027	Act5C	0.680778	0.107455	0.501	0.436	1
FBgn0002593	CG4087	RpLP1	0.683206	-0.0132656	0.706	0.73	1
FBgn0036165	CG7533	chrb	0.692774	0.113885	0.582	0.528	1
FBgn0260943	CG32169	Rbp6	0.702156	1.48752	0.888	0.93	1
FBgn0259216	CG42316	RhoGAP102A	0.704161	-0.0145384	0.13	0.117	1
FBgn0038826	CG17838	Syp	0.705765	0.188239	0.416	0.314	1
FBgn0030897	CG5744	Frq1	0.707278	0.821407	0.786	0.645	1
FBgn0031414	CG33955	eys	0.729271	0.241417	0.286	0.22	1
FBgn0038653	CG18208	Octalpha2R	0.729516	-0.0145384	0.407	0.388	1
FBgn0000535	CG10952	eag	0.736894	-0.0228862	0.321	0.318	1
FBgn0267978	CG8376	ap	0.765978	-0.00586825	0.182	0.178	1
FBgn0026160	CG7958	tna	0.771508	0.304265	0.593	0.494	1
FBgn0260657	CG42540	CG42540	0.772505	0.14526	0.715	0.645	1
FBgn0017590	CG6669	klg	0.821076	0.184346	0.31	0.243	1
FBgn0010412	CG4464	RpS19a	0.83301	-0.0227622	0.24	0.227	1
FBgn0263257	CG43395	Cngl	0.862637	0.715819	0.796	0.769	1
FBgn0262869	CG43224	Gfrl	0.869563	0.0681627	0.6	0.562	1
FBgn0036851	CG14082	CG14082	0.877016	-0.0278453	0.123	0.131	1
FBgn0032833	CG10664	COX4	0.885055	-0.0143648	0.602	0.694	1
FBgn0013467	CG18285	igl	0.885288	0.0867758	0.602	0.572	1
FBgn0013688	CR34096	mt:srRNA	0.895518	-0.00123977	0.132	0.126	1
FBgn0000024	CG17907	Ace	0.899157	0.0957352	0.528	0.488	1
FBgn0035816	CG13685	CG13685	0.90525	-0.00376891	0.162	0.15	1
FBgn0085434	CG34405	NaCP60E	0.905958	0.412786	0.631	0.55	1
FBgn0003429	CG10693	slo	0.907241	0.238871	0.569	0.486	1
FBgn0261836	CG42768	Msp300	0.955124	0.385834	0.584	0.572	1
FBgn0029761	CG10706	SK	0.95937	0.191355	0.396	0.317	1
FBgn0263995	CG43738	cpo	0.973512	0.126961	0.791	0.814	1

## Sheet: Male_C9
FlyBaseID	GeneID	Gene symbol	p_val	avg_diff	pct.1	pct.2	p_val_adj
FBgn0019660	CR32665	lncRNA:roX2	1.6116e-162	-2.15393	0.005	0.774	2.4174e-159
FBgn0004047	CG11129	Yp3	2.35765e-58	0.204368	0.174	0.001	3.53648e-55
FBgn0267519	CR45859	28SrRNA-Psi:CR45859	1.17427e-23	-0.0550501	0.064	0.113	1.76141e-20
FBgn0260429	CG42524	CG42524	4.19822e-22	0.24775	0.27	0.114	6.29732e-19
FBgn0035495	CG14989	CG14989	1.11298e-20	4.05719	1	1	1.66947e-17
FBgn0058469	CR40469	lncRNA:CR40469	1.47659e-19	0.104031	0.184	0.089	2.21488e-16
FBgn0052982	CG32982	CG32982	1.49047e-17	0.207048	0.187	0.043	2.2357e-14
FBgn0087002	CG11064	apolpp	5.72028e-17	0.164044	0.187	0.069	8.58043e-14
FBgn0036821	CG3961	CG3961	2.8806e-16	0.287986	0.236	0.097	4.3209e-13
FBgn0051690	CG31690	CG31690	4.61382e-13	0.298099	0.352	0.193	6.92073e-10
FBgn0051324	CG31324	CG31324	2.11842e-12	0.309507	0.442	0.281	3.17762e-09
FBgn0030258	CG1552	CG1552	7.05632e-12	0.0812013	0.137	0.061	1.05845e-08
FBgn0261588	CG42698	pdm3	1.05537e-10	0.148181	0.142	0.046	1.58306e-07
FBgn0262636	CG2052	dati	1.06631e-10	0.170534	0.126	0.033	1.59947e-07
FBgn0250867	CG42238	CG42238	1.18542e-10	0.29189	0.401	0.234	1.77813e-07
FBgn0259677	CG42346	CG42346	1.61063e-10	0.142247	0.192	0.088	2.41595e-07
FBgn0029768	CG16752	SPR	4.21535e-10	0.18062	0.26	0.166	6.32303e-07
FBgn0264090	CG43759	CG43759	4.56814e-10	0.13551	0.153	0.064	6.85221e-07
FBgn0083228	CG5907	Frq2	4.91533e-10	0.28206	0.226	0.079	7.37299e-07
FBgn0033987	CG12424	ckn	5.32038e-10	0.09225	0.183	0.108	7.98058e-07
FBgn0031299	CG4629	CG4629	5.42645e-10	0.096015	0.192	0.116	8.13967e-07
FBgn0036789	CG13702	AstC-R2	5.83266e-10	0.15199	0.187	0.089	8.749e-07
FBgn0002945	CG11614	nkd	1.38625e-09	0.333774	0.406	0.244	2.07937e-06
FBgn0011693	CG4899	Pdh	1.76074e-09	-0.148572	0.047	0.111	2.6411e-06
FBgn0052626	CG32626	AMPdeam	2.01062e-09	0.168558	0.288	0.183	3.01593e-06
FBgn0013995	CG5685	Calx	2.21237e-09	0.433777	0.271	0.132	3.31856e-06
FBgn0004449	CG5723	Ten-m	2.48563e-09	0.235395	0.345	0.196	3.72845e-06
FBgn0015766	CG10596	Msr-110	2.732e-09	0.091871	0.15	0.076	4.098e-06
FBgn0037963	CG6977	Cad87A	3.45625e-09	0.158877	0.172	0.077	5.18438e-06
FBgn0004607	CG1449	zfh2	3.72889e-09	0.074729	0.157	0.101	5.59334e-06
FBgn0283651	CG46301	CG46301	4.16157e-09	0.139293	0.179	0.073	6.24235e-06
FBgn0040532	CG8369	CG8369	4.63009e-09	0.355828	0.271	0.146	6.94513e-06
FBgn0264753	CG44011	Rgk1	5.87592e-09	0.182799	0.204	0.085	8.81387e-06
FBgn0052066	CG32066	CG32066	8.76681e-09	0.136629	0.236	0.136	1.31502e-05
FBgn0032797	CG10186	Hasp	1.80765e-08	0.0775643	0.887	0.924	2.71148e-05
FBgn0263773	CG43690	fok	2.75717e-08	0.196404	0.301	0.183	4.13576e-05
FBgn0265598	CG44425	Bx	2.77337e-08	0.171662	0.214	0.107	4.16006e-05
FBgn0285963	CG46339	CG46339	3.04933e-08	0.120132	0.207	0.113	4.574e-05
FBgn0260941	CG42318	app	6.52514e-08	0.274255	0.363	0.243	9.78771e-05
FBgn0085384	CG34355	CG34355	8.53492e-08	0.084341	0.109	0.04	0.000128024
FBgn0020269	CG10145	mspo	8.68514e-08	0.201844	0.284	0.173	0.000130277
FBgn0020621	CG2049	Pkn	1.12448e-07	0.0791027	0.17	0.11	0.000168672
FBgn0262614	CG43140	pyd	1.22852e-07	0.217584	0.255	0.146	0.000184279
FBgn0052057	CG32057	dpr10	1.42224e-07	0.123597	0.176	0.103	0.000213335
FBgn0040726	CG13439	dpr1	1.54782e-07	0.32373	0.374	0.244	0.000232174
FBgn0029663	CG10804	CG10804	1.67826e-07	0.870637	0.725	0.522	0.000251739
FBgn0261260	CG42611	mgl	1.94455e-07	0.0829293	0.185	0.127	0.000291683
FBgn0033405	CG13954	CG13954	2.30276e-07	0.417816	0.429	0.264	0.000345414
FBgn0030913	CG6123	CG6123	2.63748e-07	0.222055	0.223	0.121	0.000395622
FBgn0050115	CG30115	GEFmeso	4.23601e-07	0.157219	0.148	0.084	0.000635401
FBgn0010452	CG11280	trn	4.41745e-07	0.26378	0.266	0.147	0.000662617
FBgn0030158	CG9686	CG9686	5.01919e-07	0.129248	0.167	0.085	0.000752878
FBgn0002940	CG4550	ninaE	5.36247e-07	-0.226814	0.151	0.26	0.000804371
FBgn0039209	CG13624	REPTOR	6.9901e-07	0.0659803	0.305	0.237	0.00104852
FBgn0004573	CG12073	5-HT7	7.87729e-07	0.045322	0.134	0.098	0.00118159
FBgn0053179	CG33179	beat-IIIb	7.92909e-07	-0.0533968	0.361	0.332	0.00118936
FBgn0004652	CG14307	fru	9.25296e-07	0.337453	0.305	0.125	0.00138794
FBgn0051814	CG31814	DIP-kappa	9.77701e-07	0.22024	0.142	0.059	0.00146655
FBgn0031738	CG9171	CG9171	9.83094e-07	0.0762721	0.172	0.111	0.00147464
FBgn0001090	CG7088	bnb	1.02508e-06	0.0746413	0.119	0.058	0.00153762
FBgn0260971	CG42594	CG42594	1.08008e-06	0.279723	0.297	0.175	0.00162012
FBgn0051163	CG31163	SKIP	1.16849e-06	0.315858	0.33	0.166	0.00175274
FBgn0259789	CG12701	zld	1.75401e-06	0.0926562	0.105	0.038	0.00263102
FBgn0003301	CG9533	rut	2.4015e-06	0.127608	0.279	0.175	0.00360225
FBgn0050463	CG30463	Pgant9	2.8332e-06	0.0991357	0.242	0.168	0.0042498
FBgn0283499	CG18402	InR	2.86275e-06	0.109912	0.184	0.099	0.00429413
FBgn0086680	CG10037	vvl	2.97395e-06	0.15707	0.114	0.038	0.00446093
FBgn0261988	CG17998	Gprk2	3.54909e-06	0.436844	0.468	0.268	0.00532363
FBgn0261509	CG14351	haf	3.67082e-06	0.0752145	0.107	0.052	0.00550623
FBgn0085426	CG34397	Rgk3	4.03087e-06	0.0704085	0.135	0.091	0.0060463
FBgn0086359	CG3953	Invadolysin	6.78494e-06	0.0597128	0.131	0.071	0.0101774
FBgn0038542	CG7431	TyrR	7.65062e-06	0.0869596	0.134	0.075	0.0114759
FBgn0030272	CG15201	CG15201	8.40787e-06	0.187727	0.23	0.142	0.0126118
FBgn0024321	CG8524	NK7.1	9.73237e-06	0.0775512	0.126	0.061	0.0145986
FBgn0037941	CG12594	CG12594	1.1197e-05	-0.0471779	0.169	0.146	0.0167955
FBgn0000116	CG32031	Argk	1.16915e-05	0.0303402	0.895	0.911	0.0175372
FBgn0031016	CG12199	kek5	1.30634e-05	0.0810071	0.2	0.127	0.0195952
FBgn0028369	CG3653	kirre	1.3468e-05	0.130393	0.375	0.293	0.020202
FBgn0015777	CG9261	nrv2	1.37005e-05	0.0353926	0.178	0.125	0.0205507
FBgn0002543	CG5481	robo2	1.59768e-05	0.117072	0.114	0.046	0.0239651
FBgn0004619	CG8442	GluRIA	1.71845e-05	0.347354	0.371	0.224	0.0257768
FBgn0033446	CG1648	CG1648	1.79816e-05	0.104269	0.178	0.093	0.0269724
FBgn0034638	CG10433	CG10433	1.85904e-05	0.086519	0.105	0.048	0.0278856
FBgn0000121	CG5962	Arr2	1.96783e-05	0.0864112	0.116	0.182	0.0295175
FBgn0037015	CG13253	cmpy	2.3502e-05	0.168046	0.293	0.19	0.035253
FBgn0087012	CG1056	5-HT2A	2.42008e-05	0.141259	0.178	0.102	0.0363012
FBgn0004516	CG14994	Gad1	2.73168e-05	0.377103	0.939	0.917	0.0409752
FBgn0085414	CG34385	dpr12	2.92955e-05	0.0826095	0.322	0.243	0.0439432
FBgn0004395	CG4620	unk	2.96247e-05	0.143719	0.237	0.135	0.0444371
FBgn0261113	CG17836	Xrp1	3.18139e-05	0.0656463	0.207	0.149	0.0477209
FBgn0031971	CG7224	Sirup	3.26355e-05	0.137308	0.24	0.148	0.0489532
FBgn0031424	CG9887	VGlut	3.68564e-05	0.666386	0.28	0.167	0.0552846
FBgn0264000	CG43743	GluRIB	4.04192e-05	0.362147	0.477	0.343	0.0606288
FBgn0265595	CG44422	CG44422	4.35444e-05	0.316166	0.316	0.182	0.0653166
FBgn0086604	CG12484	side-VIII	4.43626e-05	0.15489	0.226	0.14	0.066544
FBgn0032666	CG5758	CG5758	5.15189e-05	0.271239	0.368	0.239	0.0772783
FBgn0000097	CG3166	aop	8.5092e-05	0.0952475	0.214	0.141	0.127638
FBgn0250869	CG42240	CG42240	9.23924e-05	0.0457721	0.117	0.077	0.138589
FBgn0260793	CG42573	2mit	9.29536e-05	0.0659815	0.21	0.136	0.13943
FBgn0261556	CG42674	CG42674	0.000104653	0.405753	0.299	0.185	0.156979
FBgn0264895	CG44086	RapGAP1	0.00010606	0.985731	0.674	0.58	0.159089
FBgn0004168	CG16720	5-HT1A	0.000134437	0.153752	0.264	0.177	0.201656
FBgn0264815	CG44007	Pde1c	0.000137702	0.126618	0.353	0.268	0.206554
FBgn0037153	CG12673	olf413	0.000145578	0.101851	0.253	0.175	0.218368
FBgn0004509	CG10772	Fur1	0.000158496	0.0294235	0.134	0.095	0.237744
FBgn0032629	CG15138	beat-IIIc	0.000165689	0.240625	0.213	0.105	0.248534
FBgn0019662	CG8593	qm	0.000166518	0.13386	0.214	0.145	0.249777
FBgn0053126	CG33126	NLaz	0.000182014	-0.122667	0.221	0.254	0.273021
FBgn0040765	CG33473	luna	0.000188912	0.411395	0.494	0.345	0.283368
FBgn0036725	CG18265	CG18265	0.000190205	0.07435	0.174	0.108	0.285308
FBgn0243512	CG7850	puc	0.000194914	0.0865356	0.209	0.146	0.292371
FBgn0033356	CG8229	CG8229	0.00020047	-0.0125752	0.108	0.126	0.300705
FBgn0033368	CG13743	CG13743	0.000218404	0.0795527	0.142	0.078	0.327607
FBgn0052521	CG32521	CG32521	0.000226144	0.114549	0.27	0.21	0.339216
FBgn0051361	CG31361	dpr17	0.000246754	0.139107	0.202	0.13	0.370131
FBgn0015774	CG10521	NetB	0.000263835	0.151425	0.216	0.127	0.395753
FBgn0285926	CG1691	Imp	0.000273161	0.336642	0.214	0.095	0.409742
FBgn0053143	CG33143	CG33143	0.000275885	0.0302431	0.181	0.145	0.413827
FBgn0053087	CG33087	LRP1	0.000281299	0.0756729	0.137	0.082	0.421948
FBgn0039816	CG11317	CG11317	0.00028972	-0.0142155	0.113	0.113	0.434581
FBgn0262160	CG9932	CG9932	0.000314034	0.234213	0.342	0.222	0.471051
FBgn0001225	CG4183	Hsp26	0.000319227	0.0459308	0.103	0.061	0.47884
FBgn0264442	CG43860	ab	0.000361227	0.130748	0.187	0.101	0.541841
FBgn0038494	CG4135	beat-IIb	0.00036549	0.0938725	0.163	0.093	0.548235
FBgn0085399	CG34370	CG34370	0.00036779	0.122855	0.254	0.176	0.551684
FBgn0265487	CG33197	mbl	0.000371326	1.41266	0.564	0.357	0.556989
FBgn0003285	CG4125	rst	0.000391161	0.0816691	0.121	0.059	0.586742
FBgn0019650	CG11186	toy	0.000396597	-0.0580856	0.195	0.203	0.594896
FBgn0004369	CG11516	Ptp99A	0.000409686	0.521284	0.699	0.583	0.614529
FBgn0264975	CG1634	Nrg	0.000415944	0.117997	0.217	0.131	0.623916
FBgn0000036	CG5610	nAChRalpha1	0.000445267	0.191419	0.454	0.352	0.667901
FBgn0040397	CG3655	CG3655	0.000456272	0.051644	0.165	0.112	0.684408
FBgn0001235	CG17117	hth	0.000525295	0.676186	0.716	0.626	0.787942
FBgn0265296	CG42256	Dscam2	0.000554887	1.60349	0.799	0.699	0.83233
FBgn0013718	CG33991	nuf	0.000560337	0.0723662	0.139	0.079	0.840505
FBgn0003651	CG11502	svp	0.000667181	0.0697287	0.207	0.166	1
FBgn0029003	CG4746	mab-21	0.000691125	0.0350479	0.251	0.222	1
FBgn0038980	CG6919	Octbeta1R	0.000697036	0.178222	0.252	0.165	1
FBgn0262782	CG5362	Mdh1	0.000704405	0.135844	0.262	0.173	1
FBgn0033268	CG2297	Obp44a	0.000722541	0.466017	0.342	0.22	1
FBgn0011656	CG1429	Mef2	0.000781343	0.0973544	0.257	0.187	1
FBgn0033108	CG15236	CG15236	0.000859671	-0.0284855	0.296	0.278	1
FBgn0261285	CG5629	Ppcs	0.000873381	0.149441	0.201	0.128	1
FBgn0000489	CG6117	Pka-C3	0.000895293	0.175022	0.15	0.085	1
FBgn0013733	CG18076	shot	0.000911967	0.17688	0.413	0.3	1
FBgn0014859	CG1864	Hr38	0.000996619	0.0677154	0.31	0.259	1
FBgn0015519	CG2302	nAChRalpha3	0.00099892	0.106049	0.24	0.169	1
FBgn0000179	CG3578	bi	0.00103302	0.410822	0.344	0.252	1
FBgn0027546	CG4766	CG4766	0.00105467	-0.00227629	0.134	0.133	1
FBgn0051708	CG31708	DIP-zeta	0.0010778	0.271354	0.196	0.133	1
FBgn0264273	CG33960	Sema2b	0.00117258	0.0867037	0.146	0.083	1
FBgn0000636	CG5803	Fas3	0.00117568	0.029793	0.207	0.174	1
FBgn0264339	CG43795	CG43795	0.00120056	0.10918	0.143	0.083	1
FBgn0050361	CG30361	mtt	0.00125457	0.0641481	0.121	0.068	1
FBgn0016797	CG9739	fz2	0.00125988	0.123764	0.219	0.141	1
FBgn0001078	CG4059	ftz-f1	0.00132627	0.127588	0.424	0.338	1
FBgn0000422	CG10697	Ddc	0.0013762	0.187295	0.249	0.156	1
FBgn0031897	CG13784	CG13784	0.00138211	0.108641	0.269	0.189	1
FBgn0005636	CG3385	nvy	0.00138922	0.0568207	0.115	0.067	1
FBgn0259243	CG42341	Pka-R1	0.00159507	0.138022	0.263	0.163	1
FBgn0024841	CG1963	Pcd	0.00162713	0.063222	0.157	0.105	1
FBgn0005558	CG1464	ey	0.00164447	-0.0578191	0.076	0.113	1
FBgn0263706	CG43658	CG43658	0.00170437	0.0261429	0.166	0.131	1
FBgn0250908	CG42242	beat-VII	0.00172673	0.103939	0.352	0.283	1
FBgn0051092	CG31092	LpR2	0.00177865	0.0199619	0.147	0.132	1
FBgn0264503	CG43902	CG43902	0.00192211	0.127838	0.186	0.109	1
FBgn0000567	CG32180	Eip74EF	0.00193114	0.0447666	0.149	0.102	1
FBgn0285952	CG3186	eEF5	0.0021633	0.118314	0.313	0.231	1
FBgn0085409	CG34380	smal	0.00224297	0.0961287	0.264	0.183	1
FBgn0035092	CG3441	Nplp1	0.002697	-0.139292	0.3	0.333	1
FBgn0004580	CG6702	Cbp53E	0.0027637	1.49931	0.538	0.308	1
FBgn0025382	CG14791	Rab27	0.00277753	-0.0105559	0.088	0.112	1
FBgn0029824	CG3726	CG3726	0.00280274	0.224064	0.391	0.298	1
FBgn0003165	CG9755	pum	0.00281136	0.477108	0.85	0.81	1
FBgn0085407	CG34378	Pvf3	0.00285267	0.52043	0.597	0.451	1
FBgn0259108	CG34387	futsch	0.00297479	2.31274	0.862	0.77	1
FBgn0267253	CG32700	CG32700	0.00298795	0.281069	0.411	0.303	1
FBgn0038498	CG14334	beat-IIa	0.00305456	0.428026	0.391	0.269	1
FBgn0261698	CG42732	SLO2	0.00305721	0.288751	0.381	0.262	1
FBgn0053639	CG33639	CG33639	0.00308726	0.0336563	0.111	0.089	1
FBgn0000037	CG4356	mAChR-A	0.00309716	0.291752	0.563	0.483	1
FBgn0028875	CG32975	nAChRalpha5	0.00312616	0.50731	0.735	0.724	1
FBgn0039617	CG14521	DIP-gamma	0.00325101	0.0372188	0.107	0.07	1
FBgn0003499	CG7847	sr	0.00331368	0.0189031	0.161	0.148	1
FBgn0031530	CG3254	Pgant2	0.00335222	0.0605679	0.138	0.099	1
FBgn0023534	CG17778	CG17778	0.00346261	0.0990919	0.236	0.168	1
FBgn0263994	CG43737	CG43737	0.00363291	0.300864	0.491	0.363	1
FBgn0019985	CG11144	mGluR	0.00364316	0.123709	0.3	0.246	1
FBgn0265597	CG44424	rad	0.00398123	0.381984	0.471	0.368	1
FBgn0052406	CG32406	PVRAP	0.0043641	0.0175364	0.201	0.177	1
FBgn0284245	CG8280	eEF1alpha1	0.00437902	0.0783672	0.412	0.362	1
FBgn0014184	CG16747	Oda	0.0045557	0.343783	0.666	0.661	1
FBgn0023179	CG6438	amon	0.00459609	0.249873	0.41	0.293	1
FBgn0261258	CG6014	rgn	0.00499763	0.0787853	0.159	0.098	1
FBgn0051619	CG31619	nolo	0.00506122	0.0982628	0.211	0.161	1
FBgn0004595	CG17228	pros	0.00556078	4.78415	0.854	0.745	1
FBgn0030090	CG12664	fend	0.00580472	0.573372	0.641	0.526	1
FBgn0085397	CG34368	Fili	0.00582251	0.158259	0.225	0.161	1
FBgn0053517	CG33517	Dop2R	0.00594912	1.51806	0.608	0.477	1
FBgn0259242	CG42340	CG42340	0.00615414	0.12812	0.251	0.162	1
FBgn0037521	CG2993	CG2993	0.00625241	0.127615	0.386	0.308	1
FBgn0260003	CG34157	Dys	0.00670635	0.0616255	0.188	0.146	1
FBgn0264574	CG43946	Glut1	0.00731329	-0.0313504	0.278	0.274	1
FBgn0011818	CG9884	oaf	0.0075279	0.0330298	0.155	0.128	1
FBgn0267322	CR45758	lncRNA:CR45758	0.00755652	0.0528259	0.139	0.106	1
FBgn0085400	CG34371	side-V	0.00773726	0.0656724	0.222	0.168	1
FBgn0052683	CG32683	CG32683	0.00780045	0.092822	0.239	0.194	1
FBgn0266137	CG18741	Dop1R2	0.00781129	0.00653277	0.116	0.095	1
FBgn0000635	CG3665	Fas2	0.00781325	0.551625	0.42	0.219	1
FBgn0002868	CG9470	MtnA	0.00803234	0.747448	0.445	0.222	1
FBgn0036043	CG8177	CG8177	0.00859961	0.102229	0.342	0.29	1
FBgn0001297	CG33956	kay	0.00911131	0.0308436	0.116	0.089	1
FBgn0261046	CG31190	Dscam3	0.00961731	0.0822945	0.165	0.111	1
FBgn0260462	CG12163	CG12163	0.010345	0.0369808	0.117	0.078	1
FBgn0036801	CG6896	MYPT-75D	0.0103478	0.168778	0.252	0.175	1
FBgn0260753	CG13758	Pdfr	0.0108782	0.0435408	0.141	0.11	1
FBgn0261999	CG42817	Ca-Ma2d	0.0110496	0.0902484	0.159	0.094	1
FBgn0036381	CG8745	CG8745	0.0113154	0.0661935	0.16	0.109	1
FBgn0266377	CG45019	Pde8	0.0113167	0.0385239	0.106	0.066	1
FBgn0284243	CG9277	betaTub56D	0.0113991	0.373189	0.473	0.297	1
FBgn0052600	CG32600	dpr8	0.0114363	0.166686	0.369	0.28	1
FBgn0031306	CG4577	CG4577	0.012393	0.0342805	0.212	0.177	1
FBgn0028644	CG4838	beat-Ic	0.0124054	0.662972	0.449	0.279	1
FBgn0052677	CG32677	X11Lbeta	0.0124999	0.220158	0.372	0.259	1
FBgn0035173	CG13907	CG13907	0.0130332	0.0473768	0.124	0.085	1
FBgn0260442	CG6831	rhea	0.0137386	0.0629224	0.148	0.093	1
FBgn0027589	CG1688	CG1688	0.0139717	-0.0135736	0.226	0.255	1
FBgn0038246	CG14853	CG14853	0.0141473	0.0678421	0.208	0.135	1
FBgn0261549	CG42667	rdgA	0.0141928	0.237926	0.266	0.169	1
FBgn0015400	CG4977	kek2	0.0148451	0.122897	0.37	0.308	1
FBgn0034731	CG10384	CG10384	0.0149582	0.0173434	0.123	0.089	1
FBgn0036494	CG7250	Toll-6	0.0151213	0.466084	0.387	0.221	1
FBgn0259821	CG42402	CG42402	0.0162573	0.0149249	0.253	0.22	1
FBgn0000575	CG1007	emc	0.0163266	0.0239697	0.465	0.444	1
FBgn0085380	CG34351	CG34351	0.0177302	-0.022725	0.148	0.148	1
FBgn0266801	CG45263	CG45263	0.0177503	-0.00655172	0.502	0.489	1
FBgn0039647	CG14509	jus	0.0179699	0.407539	0.574	0.442	1
FBgn0001234	CR31400	lncRNA:Hsromega	0.0181296	2.62565	0.959	0.964	1
FBgn0034408	CG12758	sano	0.0200658	0.067199	0.123	0.083	1
FBgn0010434	CG11949	cora	0.0202072	0.025835	0.12	0.094	1
FBgn0260660	CG42543	Mp	0.0208653	0.224089	0.403	0.327	1
FBgn0039380	CG5890	CG5890	0.0212519	-0.0044294	0.255	0.243	1
FBgn0041629	CG1787	Hexo2	0.0212924	0.0389823	0.117	0.088	1
FBgn0031632	CG15628	CG15628	0.0214494	0.268741	0.488	0.364	1
FBgn0015229	CG6575	glec	0.0216759	0.458668	0.462	0.277	1
FBgn0003429	CG10693	slo	0.0217952	0.312868	0.668	0.604	1
FBgn0052647	CG32647	CG32647	0.0220177	0.0400292	0.305	0.276	1
FBgn0038063	CG33976	Octbeta2R	0.0227581	0.257753	0.553	0.453	1
FBgn0003423	CG1417	slgA	0.0229143	0.301061	0.693	0.674	1
FBgn0033250	CG14762	CG14762	0.0230117	0.123623	0.238	0.145	1
FBgn0052698	CG32698	CARPB	0.0230922	0.368551	0.256	0.199	1
FBgn0000547	CG12676	ed	0.0233686	0.0756006	0.235	0.198	1
FBgn0013433	CG4846	beat-Ia	0.0234645	0.0444053	0.104	0.064	1
FBgn0039089	CG10152	beat-IV	0.0241286	0.127669	0.314	0.249	1
FBgn0052183	CG32183	Ccn	0.0243407	0.0886875	0.143	0.108	1
FBgn0028704	CG18660	Nckx30C	0.0243855	0.207619	0.748	0.747	1
FBgn0283451	CG11491	br	0.024896	0.163196	0.163	0.12	1
FBgn0066101	CG31094	LpR1	0.0261457	0.115526	0.345	0.325	1
FBgn0085391	CG34362	trv	0.0262285	0.996427	0.568	0.495	1
FBgn0263219	CG42330	Dscam4	0.026583	0.192073	0.388	0.303	1
FBgn0085383	CG34354	CG34354	0.0272763	0.0855289	0.266	0.222	1
FBgn0010300	CG10719	brat	0.0283715	0.101427	0.308	0.253	1
FBgn0085412	CG34383	kmr	0.0287901	0.241761	0.385	0.275	1
FBgn0004880	CG1130	scrt	0.0296114	0.97058	0.87	0.856	1
FBgn0001085	CG17697	fz	0.0296971	0.0503992	0.258	0.239	1
FBgn0031294	CG31795	IA-2	0.0322782	4.49601	0.956	0.952	1
FBgn0263930	CG4974	dally	0.0331757	0.424102	0.401	0.29	1
FBgn0033579	CG13229	CG13229	0.0345204	0.0531966	0.103	0.069	1
FBgn0039584	CG14064	beat-VI	0.0347092	0.0535306	0.177	0.137	1
FBgn0032833	CG10664	COX4	0.0347735	0.56785	0.851	0.836	1
FBgn0264087	CG43756	Slob	0.0349698	0.108844	0.251	0.186	1
FBgn0035756	CG32381	unc-13-4A	0.0355974	0.0901419	0.201	0.147	1
FBgn0003091	CG6622	Pkc53E	0.0364815	0.86025	0.59	0.419	1
FBgn0031770	CG13995	CG13995	0.0367968	0.168231	0.293	0.226	1
FBgn0010313	CG2530	corto	0.0394073	0.210995	0.454	0.362	1
FBgn0266100	CG44837	CG44837	0.0394369	0.0756812	0.186	0.131	1
FBgn0033544	CG7220	CG7220	0.0404411	0.0890925	0.23	0.175	1
FBgn0266871	CR45332	lncRNA:CR45332	0.0426121	-0.0775193	0.176	0.209	1
FBgn0013467	CG18285	igl	0.0429656	0.237096	0.542	0.496	1
FBgn0263997	CG43740	CG43740	0.0436212	0.000413332	0.106	0.113	1
FBgn0041605	CG32490	cpx	0.0439002	2.47867	0.986	0.995	1
FBgn0002023	CG10699	Lim3	0.0450346	0.0620969	0.431	0.475	1
FBgn0029814	CG15765	CG15765	0.0458896	0.580473	0.505	0.348	1
FBgn0013686	CR34094	mt:lrRNA	0.0468694	-0.839754	0.949	0.965	1
FBgn0036454	CG17839	CG17839	0.0478084	0.0704689	0.255	0.201	1
FBgn0032901	CG9339	sky	0.0482699	0.19678	0.471	0.382	1
FBgn0085420	CG34391	DIP-delta	0.048659	0.162489	0.252	0.214	1
FBgn0003326	CG17579	sca	0.048902	0.0384268	0.116	0.083	1
FBgn0030174	CG15312	CG15312	0.0510745	0.0557619	0.166	0.126	1
FBgn0085370	CG34341	Pde11	0.0540963	0.0827007	0.123	0.075	1
FBgn0083991	CG34155	CG34155	0.0543031	-0.0299115	0.125	0.132	1
FBgn0031374	CG7337	Wdr62	0.0551571	0.447592	0.486	0.31	1
FBgn0051774	CG31774	fred	0.0555223	0.00539463	0.166	0.146	1
FBgn0033159	CG17800	Dscam1	0.055559	0.074588	0.155	0.105	1
FBgn0027339	CG11352	jim	0.0565916	1.557	0.94	0.935	1
FBgn0261649	CG31247	tinc	0.0570775	0.0338766	0.13	0.104	1
FBgn0263397	CG8585	Ih	0.0575419	2.12395	0.92	0.805	1
FBgn0053202	CG33202	dpr11	0.0590178	0.047391	0.343	0.314	1
FBgn0085387	CG34358	shakB	0.0595937	0.175025	0.458	0.402	1
FBgn0030574	CG9413	sbm	0.0604672	0.0437078	0.198	0.165	1
FBgn0029761	CG10706	SK	0.0607689	0.307441	0.538	0.454	1
FBgn0261244	CG33174	inaE	0.0616507	0.435088	0.52	0.36	1
FBgn0039349	CG4685	Ssadh	0.0622735	0.0902378	0.327	0.265	1
FBgn0051221	CG31221	CG31221	0.0623091	1.93321	0.655	0.475	1
FBgn0259245	CG42343	DIP-beta	0.0636014	-0.00287674	0.141	0.15	1
FBgn0085410	CG34381	TrissinR	0.0641472	0.0489022	0.116	0.08	1
FBgn0000633	CG17716	CG17716	0.0648188	0.339641	0.51	0.425	1
FBgn0029897	CG3203	RpL17	0.0662119	0.514836	0.739	0.688	1
FBgn0000108	CG7727	Appl	0.0662659	0.677592	0.764	0.757	1
FBgn0031835	CG11319	CG11319	0.0670821	0.0362548	0.293	0.263	1
FBgn0085385	CG34356	bma	0.0675894	0.102196	0.163	0.11	1
FBgn0042696	CG2380	NfI	0.0689465	0.0998581	0.302	0.239	1
FBgn0250910	CG42244	Octbeta3R	0.0693914	0.0620578	0.172	0.122	1
FBgn0261262	CG42613	CG42613	0.0701563	1.2818	0.748	0.573	1
FBgn0263257	CG43395	Cngl	0.070184	1.17556	0.672	0.536	1
FBgn0039064	CG4467	CG4467	0.0712762	0.317821	0.493	0.369	1
FBgn0004611	CG4574	Plc21C	0.0726868	0.248903	0.441	0.315	1
FBgn0083963	CG34127	Nlg3	0.072689	0.0988195	0.596	0.561	1
FBgn0052204	CG32204	CG32204	0.073035	0.0213109	0.157	0.143	1
FBgn0261089	CG5559	Sytalpha	0.074916	0.0569794	0.107	0.067	1
FBgn0033438	CG1794	Mmp2	0.0779174	0.00807477	0.208	0.185	1
FBgn0263980	CG43729	Stacl	0.0781949	0.37249	0.439	0.324	1
FBgn0033192	CG2105	Corin	0.0822255	0.309108	0.479	0.393	1
FBgn0085382	CG34353	CG34353	0.0829048	0.041133	0.174	0.144	1
FBgn0011661	CG10701	Moe	0.0832696	0.0635832	0.178	0.14	1
FBgn0027608	CG2082	CG2082	0.0837246	0.176104	0.328	0.259	1
FBgn0020907	CG14904	Scp2	0.084288	0.478488	0.22	0.179	1
FBgn0261928	CG42795	CG42795	0.0858312	0.228198	0.438	0.35	1
FBgn0004198	CG11387	ct	0.0881511	1.84106	0.733	0.604	1
FBgn0034753	CG2852	CG2852	0.0910784	0.271272	0.485	0.374	1
FBgn0267336	CG34360	Glut4EF	0.0911193	1.14407	0.826	0.779	1
FBgn0027356	CG8604	Amph	0.0952422	0.00786396	0.151	0.141	1
FBgn0045038	CG7105	Proc	0.0954983	0.0614384	0.182	0.186	1
FBgn0036144	CG6207	GlcAT-P	0.0957998	0.138798	0.246	0.174	1
FBgn0040823	CG14162	dpr6	0.096051	0.0866232	0.227	0.184	1
FBgn0051760	CG31760	CG31760	0.097886	0.0320326	0.187	0.174	1
FBgn0085413	CG34384	CG34384	0.101039	0.248707	0.44	0.374	1
FBgn0267668	CR46006	lncRNA:CR46006	0.101631	0.081032	0.295	0.243	1
FBgn0028370	CG4192	kek3	0.104329	0.0268393	0.177	0.17	1
FBgn0262508	CG43078	CG43078	0.104488	0.0472181	0.117	0.08	1
FBgn0000535	CG10952	eag	0.10624	0.0811113	0.302	0.256	1
FBgn0013973	CG1470	Gycbeta100B	0.109962	0.0150683	0.133	0.118	1
FBgn0031381	CG7291	Npc2a	0.111522	-0.0538516	0.12	0.148	1
FBgn0037676	CG8861	CG8861	0.111629	0.315812	0.52	0.47	1
FBgn0041707	CG1168	7B2	0.115968	0.23302	0.764	0.748	1
FBgn0040297	CG9256	Nhe2	0.119326	0.0303142	0.141	0.112	1
FBgn0000303	CG12345	ChAT	0.121688	0.0979904	0.147	0.083	1
FBgn0261574	CG7749	kug	0.123064	0.0426762	0.172	0.136	1
FBgn0262738	CG3620	norpA	0.123363	0.195068	0.523	0.475	1
FBgn0011582	CG9652	Dop1R1	0.124326	0.0402862	0.188	0.165	1
FBgn0266756	CG44012	btsz	0.128864	0.092629	0.151	0.108	1
FBgn0026160	CG7958	tna	0.129796	0.360171	0.577	0.455	1
FBgn0028645	CG7644	beat-Ib	0.132997	0.114521	0.295	0.246	1
FBgn0262593	CG43128	Shab	0.133802	0.2595	0.476	0.39	1
FBgn0065099	CR33925	snRNA:7SK	0.134765	0.0569083	0.906	0.859	1
FBgn0085447	CG34418	sif	0.135039	2.03841	0.814	0.699	1
FBgn0033926	CG12505	Arc1	0.135444	-0.299092	0.143	0.167	1
FBgn0030505	CG11172	NFAT	0.138501	0.146177	0.332	0.261	1
FBgn0052506	CG32506	CG32506	0.138608	0.0695084	0.208	0.158	1
FBgn0259234	CG42332	Camta	0.140827	0.0720749	0.175	0.12	1
FBgn0037913	CG6783	fabp	0.146137	0.00773961	0.193	0.162	1
FBgn0002593	CG4087	RpLP1	0.15465	0.351124	0.809	0.78	1
FBgn0085395	CG34366	Shawl	0.157088	0.0537331	0.219	0.189	1
FBgn0041097	CG5423	robo3	0.158165	0.0399511	0.22	0.188	1
FBgn0038665	CG12269	euc	0.158597	0.037721	0.131	0.102	1
FBgn0266851	CR45312	lncRNA:CR45312	0.159741	0.0835759	0.471	0.429	1
FBgn0263220	CG43388	Hk	0.162845	0.659898	0.728	0.644	1
FBgn0011676	CG6713	Nos	0.164729	0.28329	0.301	0.261	1
FBgn0037874	CG4800	Tctp	0.166725	-0.0656025	0.524	0.536	1
FBgn0085434	CG34405	NaCP60E	0.166868	0.888602	0.774	0.675	1
FBgn0262473	CG5490	Tl	0.166966	0.121983	0.207	0.161	1
FBgn0010412	CG4464	RpS19a	0.168787	0.0792152	0.327	0.27	1
FBgn0035032	CG4692	ATPsynF	0.169945	0.86961	0.862	0.829	1
FBgn0260943	CG32169	Rbp6	0.171894	3.60974	0.884	0.822	1
FBgn0034978	CG3257	CG3257	0.172499	0.0330914	0.169	0.156	1
FBgn0002643	CG8118	mam	0.172827	0.0219184	0.231	0.208	1
FBgn0285948	CG15442	RpL27A	0.174979	0.111711	0.813	0.843	1
FBgn0264006	CG43749	dysc	0.179227	0.555211	0.781	0.757	1
FBgn0024944	CG3856	Oamb	0.180553	0.0494577	0.124	0.091	1
FBgn0265052	CG44167	St3	0.181907	-0.0206097	0.248	0.259	1
FBgn0031736	CG11030	CG11030	0.184475	0.0670841	0.161	0.11	1
FBgn0014163	CG4609	fax	0.189291	0.626678	0.589	0.412	1
FBgn0001233	CG1242	Hsp83	0.190126	0.212206	0.63	0.597	1
FBgn0262737	CG7437	mub	0.192553	1.06123	0.751	0.752	1
FBgn0027280	CG2206	l(1)G0193	0.19787	-0.0212516	0.08	0.102	1
FBgn0261836	CG42768	Msp300	0.200369	1.47611	0.835	0.767	1
FBgn0259244	CG42342	CG42342	0.20123	0.231566	0.405	0.308	1
FBgn0286778	CG46385	CG46385	0.204015	0.15145	0.327	0.258	1
FBgn0028496	CG30116	CG30116	0.20748	0.184532	0.459	0.37	1
FBgn0044328	CG32052	CG32052	0.208287	0.0509642	0.216	0.203	1
FBgn0263512	CG33980	Vsx2	0.223482	-0.0376179	0.1	0.122	1
FBgn0030897	CG5744	Frq1	0.223736	0.819132	0.594	0.435	1
FBgn0264908	CG44099	pHCl-1	0.225089	-0.00389171	0.203	0.197	1
FBgn0038321	CG6218	CG6218	0.229918	0.0254027	0.132	0.112	1
FBgn0261788	CG42734	Ank2	0.230206	0.858031	0.745	0.686	1
FBgn0039346	CG5079	CG5079	0.23209	0.0195569	0.102	0.078	1
FBgn0029123	CG18024	SoxN	0.232241	0.589697	0.48	0.367	1
FBgn0031697	CG14024	CG14024	0.23353	0.0279419	0.161	0.132	1
FBgn0033403	CG13739	CG13739	0.238453	0.58487	0.57	0.491	1
FBgn0019643	CG3318	AANAT1	0.246987	0.0288551	0.374	0.354	1
FBgn0004244	CG10537	Rdl	0.247137	1.20508	0.88	0.853	1
FBgn0034286	CG33996	dpr13	0.248049	0.323085	0.426	0.342	1
FBgn0264001	CG43744	bru3	0.249523	0.340498	0.466	0.352	1
FBgn0038826	CG17838	Syp	0.250427	0.480223	0.622	0.515	1
FBgn0050089	CG30089	CG30089	0.252105	-0.00868707	0.153	0.157	1
FBgn0025885	CG11143	Inos	0.256576	0.0034997	0.104	0.091	1
FBgn0024189	CG33141	sns	0.258416	0.0277832	0.159	0.134	1
FBgn0264606	CG43955	Fife	0.261506	0.165353	0.426	0.364	1
FBgn0033484	CG2269	CG2269	0.265271	0.700537	0.733	0.659	1
FBgn0017558	CG8808	Pdk	0.268249	0.0198743	0.108	0.09	1
FBgn0035816	CG13685	CG13685	0.26962	0.00168294	0.129	0.123	1
FBgn0051345	CG31345	CG31345	0.27496	0.0668638	0.111	0.079	1
FBgn0259111	CG42253	Ndae1	0.282163	0.0313019	0.132	0.107	1
FBgn0270928	CG32848	VAChT	0.284456	0.174113	0.225	0.107	1
FBgn0038839	CG10830	Ktl	0.284662	0.0561113	0.34	0.314	1
FBgn0260658	CG42541	CG42541	0.286939	0.0957047	0.509	0.463	1
FBgn0267252	CG3694	Ggamma30A	0.288596	2.08955	0.914	0.851	1
FBgn0267579	CR45919	lncRNA:CR45919	0.289816	0.00615379	0.108	0.097	1
FBgn0259171	CG42276	Pde9	0.292345	0.314099	0.519	0.427	1
FBgn0039925	CG17461	Kif3C	0.303283	0.0148657	0.104	0.095	1
FBgn0261804	CG42750	CG42750	0.309567	0.183454	0.493	0.461	1
FBgn0052206	CG32206	CG32206	0.310381	0.0501529	0.246	0.208	1
FBgn0086677	CG30040	jeb	0.312706	0.590526	0.427	0.292	1
FBgn0053516	CG33516	dpr3	0.317082	0.0637774	0.122	0.094	1
FBgn0259935	CG42458	CG42458	0.332356	0.0519176	0.124	0.098	1
FBgn0264005	CG43748	Hmx	0.335962	-0.00356365	0.107	0.12	1
FBgn0030432	CG4404	CG4404	0.363379	0.0250676	0.148	0.123	1
FBgn0030058	CG11294	CG11294	0.363461	-0.00270146	0.253	0.269	1
FBgn0261552	CG42670	ps	0.37086	1.37535	0.937	0.943	1
FBgn0265182	CG44247	CG44247	0.379541	0.0636969	0.248	0.2	1
FBgn0264308	CG43778	CG43778	0.381504	0.0786159	0.283	0.244	1
FBgn0032151	CG4128	nAChRalpha6	0.384904	1.34795	0.672	0.519	1
FBgn0004606	CG1322	zfh1	0.391443	0.0405515	0.129	0.111	1
FBgn0001091	CG12055	Gapdh1	0.39245	0.129933	0.439	0.395	1
FBgn0034725	CG6044	CG6044	0.39622	0.126951	0.491	0.448	1
FBgn0035170	CG12191	dpr20	0.396235	0.0217609	0.13	0.118	1
FBgn0024963	CG7535	GluClalpha	0.397423	1.29878	0.775	0.739	1
FBgn0041094	CG7590	scyl	0.400067	0.262878	0.445	0.337	1
FBgn0005771	CG4491	noc	0.411361	0.0162052	0.178	0.168	1
FBgn0013981	CG3379	His4r	0.413733	0.988566	0.928	0.895	1
FBgn0259212	CG42312	cno	0.424412	0.0313197	0.112	0.084	1
FBgn0259213	CG42313	side-II	0.427941	0.0584551	0.424	0.42	1
FBgn0013576	CG32464	mtd	0.436146	0.590717	0.814	0.761	1
FBgn0038282	CG33485	dpr9	0.438908	0.462934	0.472	0.363	1
FBgn0003435	CG9218	sm	0.445385	0.926757	0.832	0.81	1
FBgn0031258	CG4297	CG4297	0.448972	-0.0102303	0.156	0.158	1
FBgn0034138	CG8332	RpS15	0.452887	0.766571	0.911	0.906	1
FBgn0265002	CG44153	CG44153	0.454745	0.0411591	0.207	0.175	1
FBgn0027598	CG31012	cindr	0.45894	0.776419	0.694	0.511	1
FBgn0022382	CG15862	Pka-R2	0.459456	0.208157	0.353	0.256	1
FBgn0013688	CR34096	mt:srRNA	0.464781	0.0549767	0.202	0.168	1
FBgn0000064	CG6058	Ald1	0.475978	0.944097	0.837	0.715	1
FBgn0010411	CG8900	RpS18	0.47667	0.312725	0.854	0.882	1
FBgn0038156	CG14372	side-IV	0.484176	0.00820742	0.191	0.186	1
FBgn0004910	CG15855	Eip63F-1	0.492898	0.00558649	0.301	0.31	1
FBgn0031414	CG33955	eys	0.497694	0.326814	0.438	0.333	1
FBgn0042630	CG32139	Sox21b	0.501154	0.0297587	0.103	0.093	1
FBgn0086778	CG32538	nAChRalpha7	0.506443	0.785131	0.685	0.636	1
FBgn0261597	CG10305	RpS26	0.50764	0.173325	0.837	0.899	1
FBgn0032400	CG6770	CG6770	0.510083	0.818841	0.692	0.497	1
FBgn0267033	CG45477	mamo	0.514006	1.64782	0.713	0.627	1
FBgn0005775	CG7503	Con	0.521312	0.921973	0.549	0.426	1
FBgn0010113	CG15532	hdc	0.521524	0.782497	0.494	0.299	1
FBgn0032840	CG13968	sNPF	0.526993	0.168701	0.258	0.24	1
FBgn0053543	CG33543	CG33543	0.532391	0.385993	0.357	0.23	1
FBgn0262509	CG43079	nrm	0.533787	0.0221221	0.152	0.143	1
FBgn0030723	CG14948	dpr18	0.539666	0.0163639	0.192	0.168	1
FBgn0028481	CG4341	CG4341	0.543028	-0.00462363	0.269	0.263	1
FBgn0267910	CR34335	lncRNA:CR34335	0.552018	25.4026	0.992	0.939	1
FBgn0029939	CG9650	CG9650	0.556331	0.188325	0.314	0.259	1
FBgn0004858	CG4220	elB	0.560776	0.0276684	0.177	0.157	1
FBgn0085753	CR40596	28SrRNA-Psi:CR40596	0.564958	-0.0204676	0.152	0.156	1
FBgn0052264	CG32264	CG32264	0.564958	0.739375	0.791	0.732	1
FBgn0264386	CG15899	Ca-alpha1T	0.567789	0.756585	0.572	0.493	1
FBgn0264490	CG18389	Eip93F	0.571244	0.384631	0.463	0.346	1
FBgn0013954	CG11001	Fkbp12	0.577291	0.18455	0.459	0.4	1
FBgn0083949	CG34113	side-III	0.585394	0.352006	0.462	0.362	1
FBgn0266418	CG45058	wake	0.5888	-0.00649132	0.132	0.13	1
FBgn0010114	CG2040	hig	0.59129	0.434585	0.477	0.366	1
FBgn0086758	CG31666	chinmo	0.592816	0.480971	0.664	0.539	1
FBgn0000042	CG4027	Act5C	0.595941	0.282943	0.587	0.538	1
FBgn0263392	CG43444	Tet	0.596898	0.251647	0.693	0.636	1
FBgn0285944	CG9907	para	0.597128	1.08527	0.88	0.888	1
FBgn0261871	CG33507	dpr2	0.611202	0.0305783	0.144	0.13	1
FBgn0037546	CG7918	mAChR-B	0.615034	0.0546237	0.186	0.166	1
FBgn0039420	CG6154	CG6154	0.615634	0.0642085	0.207	0.179	1
FBgn0263353	CG11000	CG11000	0.628029	0.335959	0.473	0.355	1
FBgn0052017	CG32017	CG32017	0.636056	0.300537	0.737	0.716	1
FBgn0052432	CG32432	CG32432	0.638125	0.103525	0.381	0.336	1
FBgn0085421	CG34392	Epac	0.656113	0.0909792	0.207	0.17	1
FBgn0040805	CG12355	CG12355	0.658322	0.0303402	0.184	0.152	1
FBgn0259170	CG42275	alpha-Man-Ia	0.670083	0.0390072	0.235	0.224	1
FBgn0053147	CG33147	Hs3st-A	0.674673	0.331224	0.46	0.331	1
FBgn0260657	CG42540	CG42540	0.674831	0.321256	0.537	0.473	1
FBgn0016061	CG31062	side	0.682886	0.21803	0.412	0.346	1
FBgn0010263	CG3151	Rbp9	0.682903	0.253972	0.464	0.375	1
FBgn0066084	CG30425	RpL41	0.682998	3.90894	0.912	0.773	1
FBgn0036165	CG7533	chrb	0.683077	0.553956	0.631	0.525	1
FBgn0083975	CG34139	Nlg4	0.68963	0.00464495	0.185	0.179	1
FBgn0001186	CG3001	Hex-A	0.706988	2.02951	0.818	0.59	1
FBgn0034636	CG10440	twz	0.714526	0.0469173	0.167	0.137	1
FBgn0010473	CG15427	tutl	0.726159	0.406948	0.549	0.467	1
FBgn0011224	CG31000	heph	0.731261	1.20651	0.632	0.523	1
FBgn0015399	CG12283	kek1	0.734614	0.236266	0.432	0.348	1
FBgn0003380	CG12348	Sh	0.751756	1.07523	0.812	0.768	1
FBgn0015609	CG7100	CadN	0.759988	0.227096	0.46	0.375	1
FBgn0010415	CG10497	Sdc	0.772247	0.429191	0.698	0.63	1
FBgn0263289	CG43398	scrib	0.774762	0.0390072	0.255	0.233	1
FBgn0023095	CG11282	caps	0.793006	0.00310176	0.193	0.187	1
FBgn0011666	CG5099	msi	0.794614	1.30594	0.85	0.776	1
FBgn0001145	CG1743	Gs2	0.800029	0.0132515	0.116	0.107	1
FBgn0038653	CG18208	Octalpha2R	0.82291	0.159013	0.413	0.376	1
FBgn0004242	CG3139	Syt1	0.829226	1.03066	0.886	0.903	1
FBgn0003360	CG16944	sesB	0.83082	1.11881	0.878	0.906	1
FBgn0001149	CG10045	GstD1	0.835229	0.0196007	0.104	0.097	1
FBgn0052062	CG32062	Rbfox1	0.838517	1.3583	0.828	0.759	1
FBgn0083950	CG34114	side-VI	0.848783	0.445766	0.484	0.369	1
FBgn0263995	CG43738	cpo	0.854541	0.475838	0.634	0.573	1
FBgn0027654	CG2239	jdp	0.877275	0.471158	0.493	0.407	1
FBgn0017590	CG6669	klg	0.878142	0.255557	0.395	0.322	1
FBgn0000273	CG4379	Pka-C1	0.89434	0.494949	0.611	0.512	1
FBgn0039054	CG13830	Cow	0.894765	0.172937	0.439	0.354	1
FBgn0038237	CG8279	Pde6	0.89499	0.335121	0.507	0.388	1
FBgn0051665	CG31665	wry	0.895515	0.447388	0.455	0.329	1
FBgn0085432	CG34403	pan	0.897261	0.254753	0.779	0.791	1
FBgn0001124	CG8430	Got1	0.897499	0.0247241	0.103	0.084	1
FBgn0030412	CG17762	Tomosyn	0.900297	0.750763	0.739	0.658	1
FBgn0035499	CG14996	Chd64	0.90269	-0.0012092	0.12	0.118	1
FBgn0036844	CG14080	Mkp3	0.917673	0.319612	0.44	0.303	1
FBgn0261953	CG7807	TfAP-2	0.918186	0.0199797	0.142	0.127	1
FBgn0262018	CG42829	CadN2	0.922152	0.0377731	0.223	0.2	1
FBgn0262869	CG43224	Gfrl	0.935192	0.138512	0.339	0.29	1
FBgn0003274	CG4918	RpLP2	0.937657	0.252054	0.628	0.593	1
FBgn0036927	CG7433	Gabat	0.941293	0.0834563	0.341	0.314	1
FBgn0004514	CG7485	Oct-TyrR	0.955141	0.0404449	0.17	0.164	1
FBgn0036935	CG14186	CG14186	0.966494	0.0261868	0.201	0.179	1
FBgn0267001	CG42338	Ten-a	0.966541	1.61317	0.877	0.785	1
FBgn0037525	CG17816	CG17816	0.977226	0.299046	0.55	0.474	1
FBgn0000024	CG17907	Ace	0.989062	0.301138	0.456	0.382	1

[truncated: 27 more sheets: Male_C10, Male_C11, Male_C12, Male_C13, Male_C14, Male_C15, Male_C16, Male_C17, Male_C18, Male_C19, Male_C20, Male_C21, Male_C22, Male_C23, Male_C24, Male_C25, Male_C26, Male_C27, Male_C28, Male_C29 …]
