# Supplementary material for: The Drosophila brain on cocaine at single-cell resolution
Source: Genome Res. 2021 Oct;31(10):1927–37. doi: 10.1101/gr.268037.120 (PMC8494231; doi:10.1101/gr.268037.120)
Supplement: Supplemental Material [file supp_gr.268037.120_Supplemental_Table_S8_xlsx.xlsx]

## Sheet: Female_C0
FlyBaseID	GeneID	Gene symbol	p_val	avg_diff	pct.1	pct.2	p_val_adj
FBgn0019660	CR32665	lncRNA:roX2	1.42302e-254	-1.55313	0.005	0.624	2.13453e-251
FBgn0013688	CR34096	mt:srRNA	8.73775e-73	0.126086	0.125	0.014	1.31066e-69
FBgn0085753	CR40596	28SrRNA-Psi:CR40596	3.37555e-72	0.13697	0.127	0.023	5.06333e-69
FBgn0033987	CG12424	ckn	2.43205e-21	0.0466403	0.148	0.108	3.64808e-18
FBgn0283651	CG46301	CG46301	1.99899e-19	0.202979	0.294	0.19	2.99849e-16
FBgn0052057	CG32057	dpr10	7.07794e-18	0.0748698	0.175	0.12	1.06169e-14
FBgn0058469	CR40469	lncRNA:CR40469	6.55955e-17	0.0692603	0.131	0.079	9.83933e-14
FBgn0264794	CR44024	lncRNA:CR44024	9.97566e-17	0.20079	0.347	0.241	1.49635e-13
FBgn0052982	CG32982	CG32982	2.59624e-16	0.0710335	0.143	0.09	3.89435e-13
FBgn0004573	CG12073	5-HT7	1.33736e-15	0.0520303	0.12	0.071	2.00604e-12
FBgn0267910	CR34335	lncRNA:CR34335	4.9513e-15	3.86439	0.977	0.86	7.42696e-12
FBgn0002940	CG4550	ninaE	1.24133e-14	-0.0925315	0.069	0.128	1.86199e-11
FBgn0267322	CR45758	lncRNA:CR45758	1.26991e-14	0.0758879	0.183	0.13	1.90486e-11
FBgn0003301	CG9533	rut	1.66842e-14	0.123826	0.229	0.132	2.50262e-11
FBgn0052683	CG32683	CG32683	4.79659e-14	0.158317	0.207	0.121	7.19489e-11
FBgn0014859	CG1864	Hr38	1.36645e-13	-0.789987	0.404	0.533	2.04968e-10
FBgn0065099	CR33925	snRNA:7SK	5.0406e-13	2.77391	0.687	0.489	7.5609e-10
FBgn0031299	CG4629	CG4629	9.10509e-13	0.0252755	0.134	0.116	1.36576e-09
FBgn0029768	CG16752	SPR	1.56275e-12	0.120012	0.19	0.123	2.34412e-09
FBgn0038246	CG14853	CG14853	1.76556e-12	0.0742341	0.155	0.102	2.64834e-09
FBgn0262473	CG5490	Tl	1.8036e-12	0.0746679	0.171	0.113	2.7054e-09
FBgn0013995	CG5685	Calx	3.96536e-12	0.168145	0.274	0.178	5.94804e-09
FBgn0264753	CG44011	Rgk1	6.13012e-12	0.0836367	0.143	0.09	9.19518e-09
FBgn0085399	CG34370	CG34370	1.3335e-11	0.0612838	0.134	0.085	2.00025e-08
FBgn0020621	CG2049	Pkn	1.60282e-11	0.0614045	0.119	0.065	2.40423e-08
FBgn0031294	CG31795	IA-2	2.19747e-11	5.0335	0.992	0.99	3.2962e-08
FBgn0004619	CG8442	GluRIA	2.65883e-11	0.17783	0.31	0.214	3.98824e-08
FBgn0265052	CG44167	St3	3.30372e-11	0.040178	0.146	0.114	4.95558e-08
FBgn0036789	CG13702	AstC-R2	3.33819e-11	0.0787158	0.138	0.092	5.00728e-08
FBgn0259677	CG42346	CG42346	3.8702e-11	0.0871559	0.163	0.102	5.80529e-08
FBgn0004395	CG4620	unk	8.59028e-11	0.0761183	0.201	0.149	1.28854e-07
FBgn0261090	CG42333	Sytbeta	1.11895e-10	0.117389	0.234	0.15	1.67843e-07
FBgn0259170	CG42275	alpha-Man-Ia	1.14538e-10	0.0727198	0.164	0.106	1.71807e-07
FBgn0033356	CG8229	CG8229	1.51006e-10	-0.0298226	0.089	0.114	2.2651e-07
FBgn0052521	CG32521	CG32521	1.87232e-10	0.0577334	0.128	0.079	2.80849e-07
FBgn0087012	CG1056	5-HT2A	2.0097e-10	0.078316	0.113	0.055	3.01455e-07
FBgn0053087	CG33087	LRP1	2.82206e-10	0.0310153	0.105	0.072	4.2331e-07
FBgn0040877	CG12994	CG12994	4.45874e-10	0.0685053	0.113	0.067	6.68811e-07
FBgn0050361	CG30361	mtt	4.56236e-10	0.0831121	0.145	0.092	6.84355e-07
FBgn0050115	CG30115	GEFmeso	6.14934e-10	0.0606467	0.112	0.066	9.22402e-07
FBgn0250910	CG42244	Octbeta3R	7.00757e-10	0.0706484	0.184	0.128	1.05113e-06
FBgn0001226	CG4466	Hsp27	7.35047e-10	-0.326507	0.129	0.22	1.10257e-06
FBgn0023095	CG11282	caps	1.52893e-09	0.0396547	0.136	0.107	2.29339e-06
FBgn0001234	CR31400	lncRNA:Hsromega	2.44801e-09	1.91173	0.988	0.989	3.67201e-06
FBgn0261260	CG42611	mgl	2.53159e-09	0.0829589	0.191	0.135	3.79738e-06
FBgn0266377	CG45019	Pde8	1.06846e-08	0.0621486	0.183	0.134	1.60269e-05
FBgn0024189	CG33141	sns	1.85502e-08	0.0475973	0.165	0.127	2.78254e-05
FBgn0027356	CG8604	Amph	2.92819e-08	0.064159	0.177	0.129	4.39229e-05
FBgn0037963	CG6977	Cad87A	3.34053e-08	0.100827	0.204	0.144	5.0108e-05
FBgn0002543	CG5481	robo2	5.89633e-08	0.0808116	0.142	0.093	8.84449e-05
FBgn0002643	CG8118	mam	6.40167e-08	0.0928834	0.209	0.143	9.6025e-05
FBgn0261649	CG31247	tinc	8.01064e-08	0.0691071	0.169	0.123	0.00012016
FBgn0260971	CG42594	CG42594	9.06269e-08	0.107896	0.238	0.179	0.00013594
FBgn0051690	CG31690	CG31690	1.1133e-07	0.0794856	0.243	0.194	0.000166995
FBgn0029663	CG10804	CG10804	1.39515e-07	0.374616	0.601	0.467	0.000209272
FBgn0260442	CG6831	rhea	1.61892e-07	0.0400058	0.129	0.095	0.000242838
FBgn0265194	CG44240	Trpm	1.73987e-07	0.0417505	0.139	0.102	0.000260981
FBgn0263257	CG43395	Cngl	2.5251e-07	0.949353	0.739	0.669	0.000378764
FBgn0267431	CG45784	Myo81F	3.76281e-07	0.0878513	0.16	0.113	0.000564421
FBgn0264090	CG43759	CG43759	3.86046e-07	0.0895052	0.197	0.143	0.000579068
FBgn0035816	CG13685	CG13685	4.17756e-07	0.0328914	0.197	0.169	0.000626634
FBgn0031736	CG11030	CG11030	4.40827e-07	0.121391	0.292	0.226	0.000661241
FBgn0028888	CG4168	CG4168	7.78603e-07	0.0268494	0.117	0.096	0.00116791
FBgn0000547	CG12676	ed	9.21217e-07	0.0763189	0.201	0.155	0.00138183
FBgn0001085	CG17697	fz	1.38265e-06	0.0683681	0.218	0.172	0.00207397
FBgn0083228	CG5907	Frq2	1.61089e-06	0.223898	0.362	0.252	0.00241634
FBgn0052066	CG32066	CG32066	1.75388e-06	0.0369773	0.14	0.108	0.00263082
FBgn0263873	CG43720	sick	2.03655e-06	0.0453036	0.132	0.094	0.00305482
FBgn0262018	CG42829	CadN2	2.12275e-06	0.0329267	0.156	0.127	0.00318413
FBgn0004102	CG12154	oc	2.45136e-06	0.0897777	0.134	0.086	0.00367704
FBgn0033368	CG13743	CG13743	2.58995e-06	0.0687546	0.192	0.147	0.00388492
FBgn0033159	CG17800	Dscam1	3.07955e-06	0.0469383	0.257	0.234	0.00461933
FBgn0261046	CG31190	Dscam3	3.67115e-06	0.0759082	0.219	0.166	0.00550673
FBgn0051092	CG31092	LpR2	4.00131e-06	0.0161088	0.113	0.1	0.00600196
FBgn0001225	CG4183	Hsp26	4.01879e-06	-0.260326	0.174	0.244	0.00602819
FBgn0027654	CG2239	jdp	4.46105e-06	-0.574191	0.782	0.791	0.00669158
FBgn0025382	CG14791	Rab27	5.7926e-06	-0.0521039	0.144	0.19	0.00868889
FBgn0000064	CG6058	Ald1	7.64274e-06	-0.846304	0.722	0.81	0.0114641
FBgn0266429	CG2872	AstA-R1	7.7361e-06	0.0577077	0.102	0.065	0.0116041
FBgn0260003	CG34157	Dys	8.7272e-06	0.0445417	0.154	0.118	0.0130908
FBgn0085426	CG34397	Rgk3	9.4512e-06	0.0630326	0.112	0.071	0.0141768
FBgn0042696	CG2380	NfI	1.22402e-05	0.0571436	0.169	0.134	0.0183603
FBgn0085397	CG34368	Fili	1.4083e-05	0.0324672	0.119	0.094	0.0211245
FBgn0085420	CG34391	DIP-delta	2.07353e-05	0.201568	0.32	0.248	0.0311029
FBgn0004882	CG10868	orb	2.1323e-05	0.0673367	0.129	0.088	0.0319845
FBgn0031738	CG9171	CG9171	2.90119e-05	0.0401224	0.13	0.098	0.0435178
FBgn0250867	CG42238	CG42238	2.9771e-05	0.0274214	0.179	0.157	0.0446565
FBgn0015774	CG10521	NetB	3.1392e-05	0.201247	0.317	0.24	0.047088
FBgn0032901	CG9339	sky	3.33186e-05	-0.0689401	0.433	0.485	0.0499779
FBgn0000179	CG3578	bi	3.67387e-05	0.210453	0.279	0.203	0.0551081
FBgn0262782	CG5362	Mdh1	4.42107e-05	-0.0715504	0.163	0.222	0.066316
FBgn0051760	CG31760	CG31760	4.49822e-05	0.070872	0.226	0.183	0.0674733
FBgn0265595	CG44422	CG44422	6.26801e-05	0.249401	0.306	0.205	0.0940201
FBgn0263706	CG43658	CG43658	7.60981e-05	0.0983276	0.179	0.126	0.114147
FBgn0037913	CG6783	fabp	8.2604e-05	-0.0617072	0.132	0.183	0.123906
FBgn0052204	CG32204	CG32204	0.000112778	0.0435847	0.126	0.097	0.169166
FBgn0025525	CG9102	bab2	0.000127789	0.00679152	0.109	0.108	0.191683
FBgn0259108	CG34387	futsch	0.000177131	0.721999	0.909	0.865	0.265696
FBgn0036454	CG17839	CG17839	0.000191727	0.057347	0.162	0.122	0.28759
FBgn0266100	CG44837	CG44837	0.000222752	0.0180825	0.144	0.127	0.334128
FBgn0259245	CG42343	DIP-beta	0.000257804	0.0923005	0.145	0.102	0.386706
FBgn0031016	CG12199	kek5	0.000280056	0.0153225	0.119	0.103	0.420085
FBgn0033403	CG13739	CG13739	0.000290415	0.239622	0.307	0.202	0.435622
FBgn0035499	CG14996	Chd64	0.000296853	0.0394174	0.17	0.134	0.445279
FBgn0267001	CG42338	Ten-a	0.000349205	1.50804	0.868	0.741	0.523808
FBgn0259212	CG42312	cno	0.000380331	0.0485368	0.112	0.074	0.570496
FBgn0263353	CG11000	CG11000	0.00038345	0.0912789	0.524	0.497	0.575175
FBgn0051324	CG31324	CG31324	0.000400982	0.0534468	0.156	0.127	0.601473
FBgn0039209	CG13624	REPTOR	0.000446426	0.106175	0.262	0.197	0.66964
FBgn0003326	CG17579	sca	0.000464185	0.0357151	0.178	0.157	0.696277
FBgn0041097	CG5423	robo3	0.000487034	0.046666	0.161	0.129	0.730551
FBgn0085390	CG34361	Dgk	0.000527143	0.0510122	0.108	0.069	0.790714
FBgn0037941	CG12594	CG12594	0.000540359	0.0930662	0.239	0.195	0.810539
FBgn0020269	CG10145	mspo	0.000567438	0.0732281	0.23	0.186	0.851157
FBgn0037546	CG7918	mAChR-B	0.00058728	0.0373298	0.103	0.076	0.880921
FBgn0264308	CG43778	CG43778	0.000643639	0.10239	0.257	0.2	0.965458
FBgn0036927	CG7433	Gabat	0.000687122	-0.0358161	0.232	0.269	1
FBgn0052506	CG32506	CG32506	0.000693474	0.0439396	0.264	0.232	1
FBgn0044328	CG32052	CG32052	0.000724617	-0.0479654	0.258	0.295	1
FBgn0000287	CG4881	salr	0.000747802	0.10063	0.131	0.091	1
FBgn0013686	CR34094	mt:lrRNA	0.000894597	8.35356	0.869	0.559	1
FBgn0051163	CG31163	SKIP	0.000903407	0.170688	0.326	0.253	1
FBgn0001224	CG4463	Hsp23	0.000964778	-0.232934	0.191	0.251	1
FBgn0261285	CG5629	Ppcs	0.000976462	0.0641223	0.203	0.161	1
FBgn0000042	CG4027	Act5C	0.00104506	0.230029	0.75	0.746	1
FBgn0010434	CG11949	cora	0.00105313	0.0181354	0.18	0.172	1
FBgn0027339	CG11352	jim	0.00108033	2.33621	0.951	0.912	1
FBgn0019643	CG3318	AANAT1	0.00110714	-0.0462286	0.163	0.204	1
FBgn0264000	CG43743	GluRIB	0.00114056	0.271032	0.423	0.314	1
FBgn0030913	CG6123	CG6123	0.00120154	0.123961	0.421	0.377	1
FBgn0000659	CG10002	fkh	0.00125699	0.0464884	0.147	0.12	1
FBgn0039346	CG5079	CG5079	0.00125853	-0.0445327	0.137	0.179	1
FBgn0036801	CG6896	MYPT-75D	0.00135331	0.10158	0.228	0.174	1
FBgn0019985	CG11144	mGluR	0.00170151	0.156969	0.355	0.295	1
FBgn0001091	CG12055	Gapdh1	0.0017066	-0.155855	0.295	0.387	1
FBgn0261574	CG7749	kug	0.00218584	0.053356	0.167	0.135	1
FBgn0011818	CG9884	oaf	0.00221546	0.0331897	0.14	0.116	1
FBgn0083975	CG34139	Nlg4	0.00237259	0.0338241	0.181	0.156	1
FBgn0000635	CG3665	Fas2	0.00241832	0.0722844	0.255	0.21	1
FBgn0031424	CG9887	VGlut	0.00251255	1.82288	0.947	0.935	1
FBgn0264490	CG18389	Eip93F	0.00326531	0.400631	0.323	0.253	1
FBgn0005636	CG3385	nvy	0.00326628	-0.020744	0.101	0.122	1
FBgn0260429	CG42524	CG42524	0.00363388	0.0202706	0.116	0.102	1
FBgn0085395	CG34366	Shawl	0.00370843	0.0381405	0.137	0.105	1
FBgn0027608	CG2082	CG2082	0.00376392	-0.0273667	0.288	0.322	1
FBgn0031632	CG15628	CG15628	0.00379891	-0.0616305	0.431	0.48	1
FBgn0085387	CG34358	shakB	0.00380954	0.252752	0.477	0.425	1
FBgn0085413	CG34384	CG34384	0.00387332	0.0642808	0.245	0.196	1
FBgn0030090	CG12664	fend	0.00398725	-0.0604009	0.408	0.464	1
FBgn0264339	CG43795	CG43795	0.00406669	-0.12435	0.225	0.274	1
FBgn0026411	CG11354	Lim1	0.00409747	0.150485	0.148	0.114	1
FBgn0085409	CG34380	smal	0.00422701	0.035326	0.238	0.213	1
FBgn0285926	CG1691	Imp	0.00442999	0.187171	0.207	0.161	1
FBgn0003360	CG16944	sesB	0.00451889	-0.0757541	0.81	0.826	1
FBgn0004595	CG17228	pros	0.00456887	5.14445	0.882	0.871	1
FBgn0262509	CG43079	nrm	0.00466252	0.0894644	0.271	0.211	1
FBgn0011224	CG31000	heph	0.00500295	0.861889	0.613	0.545	1
FBgn0040765	CG33473	luna	0.0050767	0.157639	0.356	0.288	1
FBgn0066084	CG30425	RpL41	0.00558667	1.24404	0.847	0.541	1
FBgn0028481	CG4341	CG4341	0.00585509	0.0902507	0.247	0.196	1
FBgn0031971	CG7224	Sirup	0.0059419	-0.052539	0.149	0.185	1
FBgn0267579	CR45919	lncRNA:CR45919	0.00606299	0.0373542	0.142	0.111	1
FBgn0086604	CG12484	side-VIII	0.00623054	0.0768042	0.244	0.198	1
FBgn0037153	CG12673	olf413	0.00626206	0.152144	0.329	0.267	1
FBgn0050463	CG30463	Pgant9	0.00726424	0.0557649	0.211	0.18	1
FBgn0032629	CG15138	beat-IIIc	0.00735807	0.127953	0.297	0.245	1
FBgn0038494	CG4135	beat-IIb	0.00756706	0.0416637	0.128	0.1	1
FBgn0004607	CG1449	zfh2	0.00777019	0.0702688	0.128	0.098	1
FBgn0033268	CG2297	Obp44a	0.0078557	-0.0767453	0.146	0.189	1
FBgn0038087	CG10134	beat-Va	0.00814801	0.0200374	0.121	0.106	1
FBgn0013733	CG18076	shot	0.00815109	0.100925	0.318	0.253	1
FBgn0285944	CG9907	para	0.00818497	1.04055	0.823	0.707	1
FBgn0028704	CG18660	Nckx30C	0.00851968	0.273194	0.672	0.635	1
FBgn0261552	CG42670	ps	0.00878682	0.127936	0.896	0.916	1
FBgn0051814	CG31814	DIP-kappa	0.00924655	0.0626705	0.147	0.121	1
FBgn0010113	CG15532	hdc	0.00986794	0.642209	0.669	0.578	1
FBgn0011656	CG1429	Mef2	0.00990177	-0.0121238	0.241	0.25	1
FBgn0028496	CG30116	CG30116	0.00990655	0.0860382	0.38	0.363	1
FBgn0015777	CG9261	nrv2	0.0106779	0.0101657	0.133	0.126	1
FBgn0259244	CG42342	CG42342	0.0107558	-0.166677	0.388	0.454	1
FBgn0035756	CG32381	unc-13-4A	0.0108261	0.12088	0.333	0.282	1
FBgn0035032	CG4692	ATPsynF	0.0109527	-0.484772	0.746	0.834	1
FBgn0262614	CG43140	pyd	0.0111416	0.0459569	0.196	0.171	1
FBgn0262160	CG9932	CG9932	0.0113746	0.0476107	0.226	0.192	1
FBgn0085421	CG34392	Epac	0.0117956	0.0577725	0.215	0.18	1
FBgn0004885	CG6863	tok	0.0121985	0.0597884	0.174	0.143	1
FBgn0266851	CR45312	lncRNA:CR45312	0.0123917	-0.0882438	0.192	0.236	1
FBgn0004652	CG14307	fru	0.0125312	0.314395	0.306	0.211	1
FBgn0085432	CG34403	pan	0.0127387	0.80876	0.739	0.587	1
FBgn0262636	CG2052	dati	0.0127665	0.225892	0.44	0.378	1
FBgn0000303	CG12345	ChAT	0.0127929	0.00244939	0.135	0.144	1
FBgn0261928	CG42795	CG42795	0.013431	0.0488308	0.248	0.205	1
FBgn0053516	CG33516	dpr3	0.0134759	0.0190708	0.147	0.127	1
FBgn0035092	CG3441	Nplp1	0.013607	0.202713	0.345	0.298	1
FBgn0003499	CG7847	sr	0.0136311	-0.0237093	0.284	0.284	1
FBgn0038929	CG13408	CG13408	0.0140977	-0.0834868	0.118	0.143	1
FBgn0013576	CG32464	mtd	0.0142265	0.440331	0.72	0.631	1
FBgn0259111	CG42253	Ndae1	0.0143244	0.0166849	0.148	0.139	1
FBgn0086359	CG3953	Invadolysin	0.0147698	0.029341	0.183	0.158	1
FBgn0033544	CG7220	CG7220	0.0152306	-0.060963	0.208	0.257	1
FBgn0015400	CG4977	kek2	0.0163073	0.0275199	0.338	0.347	1
FBgn0259234	CG42332	Camta	0.0171618	0.0383397	0.166	0.141	1
FBgn0085407	CG34378	Pvf3	0.0172948	0.36886	0.453	0.397	1
FBgn0039349	CG4685	Ssadh	0.0177003	-0.0131159	0.101	0.114	1
FBgn0263220	CG43388	Hk	0.0180439	0.292852	0.677	0.599	1
FBgn0031530	CG3254	Pgant2	0.0186748	0.0335936	0.153	0.147	1
FBgn0052206	CG32206	CG32206	0.0194853	0.102602	0.221	0.16	1
FBgn0287186	CG17594	scro	0.0196598	0.0423605	0.118	0.09	1
FBgn0085382	CG34353	CG34353	0.0198301	0.0576179	0.253	0.22	1
FBgn0285952	CG3186	eEF5	0.0224227	-0.0312085	0.325	0.357	1
FBgn0011661	CG10701	Moe	0.0231448	-0.0317953	0.217	0.238	1
FBgn0004168	CG16720	5-HT1A	0.0232012	0.0607006	0.257	0.236	1
FBgn0264815	CG44007	Pde1c	0.0237931	0.107998	0.291	0.237	1
FBgn0004910	CG15855	Eip63F-1	0.0238632	0.0815029	0.161	0.129	1
FBgn0038839	CG10830	Ktl	0.0241644	0.000286811	0.316	0.336	1
FBgn0267668	CR46006	lncRNA:CR46006	0.0242622	0.0236162	0.12	0.105	1
FBgn0267253	CG32700	CG32700	0.0251274	0.127544	0.305	0.253	1
FBgn0262738	CG3620	norpA	0.0260342	0.047819	0.433	0.422	1
FBgn0052698	CG32698	CARPB	0.0264186	0.0179673	0.104	0.096	1
FBgn0037874	CG4800	Tctp	0.0268647	-0.0127571	0.337	0.357	1
FBgn0026160	CG7958	tna	0.0269851	0.214394	0.408	0.3	1
FBgn0052017	CG32017	CG32017	0.0275971	0.518613	0.803	0.756	1
FBgn0035171	CG12502	CG12502	0.0277028	0.0144427	0.158	0.146	1
FBgn0259213	CG42313	side-II	0.0277871	-0.0450551	0.333	0.371	1
FBgn0039420	CG6154	CG6154	0.0280308	0.0403731	0.172	0.151	1
FBgn0030574	CG9413	sbm	0.0291507	0.0323681	0.182	0.168	1
FBgn0261262	CG42613	CG42613	0.0291543	0.395565	0.542	0.381	1
FBgn0261549	CG42667	rdgA	0.0293584	0.18862	0.352	0.302	1
FBgn0034731	CG10384	CG10384	0.029749	0.0518729	0.169	0.137	1
FBgn0010300	CG10719	brat	0.0304081	0.271383	0.42	0.326	1
FBgn0037525	CG17816	CG17816	0.0305104	0.203558	0.521	0.451	1
FBgn0016797	CG9739	fz2	0.0315129	0.0575298	0.252	0.227	1
FBgn0000108	CG7727	Appl	0.0317771	0.807293	0.893	0.843	1
FBgn0014184	CG16747	Oda	0.0334212	0.0474752	0.661	0.651	1
FBgn0001229	CG4190	Hsp67Bc	0.0337245	-0.0506425	0.11	0.137	1
FBgn0284245	CG8280	eEF1alpha1	0.034474	-0.0248803	0.26	0.282	1
FBgn0283499	CG18402	InR	0.0345037	0.0805905	0.243	0.199	1
FBgn0051361	CG31361	dpr17	0.0350562	0.021252	0.148	0.142	1
FBgn0015519	CG2302	nAChRalpha3	0.0360079	0.104662	0.238	0.186	1
FBgn0040397	CG3655	CG3655	0.0370001	0.0533899	0.148	0.114	1
FBgn0013981	CG3379	His4r	0.0393679	-0.324523	0.949	0.965	1
FBgn0037676	CG8861	CG8861	0.03959	-0.00579179	0.222	0.241	1
FBgn0029824	CG3726	CG3726	0.0398528	0.0868902	0.166	0.125	1
FBgn0085385	CG34356	bma	0.0400475	0.120682	0.265	0.235	1
FBgn0040532	CG8369	CG8369	0.0447351	-0.00236318	0.151	0.153	1
FBgn0000535	CG10952	eag	0.0450365	0.0676008	0.26	0.241	1
FBgn0284243	CG9277	betaTub56D	0.04628	-0.215462	0.357	0.453	1
FBgn0263994	CG43737	CG43737	0.0467127	0.299341	0.546	0.437	1
FBgn0033791	CG3915	Drl-2	0.0469441	-0.00995739	0.175	0.177	1
FBgn0004514	CG7485	Oct-TyrR	0.047215	-0.00590399	0.127	0.14	1
FBgn0004369	CG11516	Ptp99A	0.0473024	0.413953	0.673	0.595	1
FBgn0053143	CG33143	CG33143	0.0476365	-0.045513	0.236	0.274	1
FBgn0086680	CG10037	vvl	0.0498292	0.0713236	0.104	0.075	1
FBgn0004242	CG3139	Syt1	0.0499092	0.547481	0.873	0.866	1
FBgn0051646	CG31646	DIP-theta	0.0510779	0.0588516	0.164	0.14	1
FBgn0030897	CG5744	Frq1	0.0547778	0.359394	0.576	0.484	1
FBgn0264001	CG43744	bru3	0.0555325	1.43766	0.864	0.786	1
FBgn0038980	CG6919	Octbeta1R	0.0555612	0.059783	0.165	0.143	1
FBgn0038156	CG14372	side-IV	0.0557111	0.0321201	0.102	0.085	1
FBgn0032833	CG10664	COX4	0.0587526	-0.784838	0.751	0.861	1
FBgn0037171	CG14459	CG14459	0.0598598	0.0390365	0.115	0.095	1
FBgn0053202	CG33202	dpr11	0.0606234	0.0220935	0.301	0.283	1
FBgn0259789	CG12701	zld	0.0620799	0.0268601	0.18	0.173	1
FBgn0043364	CG4427	cbt	0.0625924	-0.0288142	0.14	0.164	1
FBgn0038321	CG6218	CG6218	0.0630532	-0.00176247	0.101	0.102	1
FBgn0002868	CG9470	MtnA	0.0637312	0.131737	0.216	0.149	1
FBgn0261113	CG17836	Xrp1	0.0661481	0.000917359	0.241	0.24	1
FBgn0028645	CG7644	beat-Ib	0.0662469	0.094838	0.3	0.254	1
FBgn0032666	CG5758	CG5758	0.0665923	0.0193743	0.232	0.217	1
FBgn0031306	CG4577	CG4577	0.0667976	0.335636	0.385	0.326	1
FBgn0034753	CG2852	CG2852	0.0672429	-0.276509	0.481	0.582	1
FBgn0267033	CG45477	mamo	0.0698047	0.46821	0.395	0.309	1
FBgn0261244	CG33174	inaE	0.0702564	0.0437401	0.362	0.343	1
FBgn0263772	CG43689	CG43689	0.0743612	0.105483	0.103	0.084	1
FBgn0036144	CG6207	GlcAT-P	0.078675	0.0401424	0.293	0.278	1
FBgn0085384	CG34355	CG34355	0.0826647	0.23054	0.534	0.471	1
FBgn0263995	CG43738	cpo	0.0841212	0.249047	0.594	0.551	1
FBgn0264442	CG43860	ab	0.0890722	-0.0785078	0.25	0.294	1
FBgn0263392	CG43444	Tet	0.0905939	0.0810166	0.551	0.533	1
FBgn0285963	CG46339	CG46339	0.0927766	0.0144793	0.112	0.101	1
FBgn0036043	CG8177	CG8177	0.0935729	0.0109434	0.307	0.315	1
FBgn0086758	CG31666	chinmo	0.0938563	0.321097	0.701	0.645	1
FBgn0263930	CG4974	dally	0.095753	0.0318082	0.207	0.192	1
FBgn0051191	CG31191	CG31191	0.0964862	0.0379995	0.105	0.085	1
FBgn0001235	CG17117	hth	0.0999417	0.217782	0.403	0.367	1
FBgn0000114	CG31762	bru1	0.104131	-0.0245248	0.088	0.107	1
FBgn0010412	CG4464	RpS19a	0.107489	0.00925706	0.319	0.306	1
FBgn0031258	CG4297	CG4297	0.113755	-0.021556	0.09	0.113	1
FBgn0028370	CG4192	kek3	0.115211	0.0123482	0.141	0.131	1
FBgn0029814	CG15765	CG15765	0.118417	0.00517574	0.474	0.467	1
FBgn0031374	CG7337	Wdr62	0.12003	-0.0110234	0.385	0.406	1
FBgn0051221	CG31221	CG31221	0.121194	0.472634	0.531	0.406	1
FBgn0001078	CG4059	ftz-f1	0.121284	0.101196	0.248	0.197	1
FBgn0033250	CG14762	CG14762	0.121576	-0.0131296	0.166	0.182	1
FBgn0004509	CG10772	Fur1	0.125805	0.036439	0.198	0.182	1
FBgn0266801	CG45263	CG45263	0.13002	-0.0746909	0.408	0.432	1
FBgn0034138	CG8332	RpS15	0.133018	-0.558607	0.838	0.923	1
FBgn0261804	CG42750	CG42750	0.133575	-0.0195259	0.356	0.374	1
FBgn0024321	CG8524	NK7.1	0.134011	0.00110455	0.171	0.174	1
FBgn0038826	CG17838	Syp	0.134968	0.223045	0.462	0.387	1
FBgn0263773	CG43690	fok	0.141271	0.00494504	0.193	0.184	1
FBgn0034978	CG3257	CG3257	0.152849	-0.013013	0.179	0.189	1
FBgn0262508	CG43078	CG43078	0.153342	-0.0208579	0.089	0.101	1
FBgn0038653	CG18208	Octalpha2R	0.153494	0.0872517	0.3	0.278	1
FBgn0261988	CG17998	Gprk2	0.158466	0.162858	0.368	0.28	1
FBgn0013973	CG1470	Gycbeta100B	0.161077	0.0397034	0.187	0.162	1
FBgn0039054	CG13830	Cow	0.1627	0.198581	0.507	0.436	1
FBgn0265002	CG44153	CG44153	0.164771	-0.0223086	0.197	0.216	1
FBgn0262737	CG7437	mub	0.165255	0.68582	0.701	0.561	1
FBgn0004449	CG5723	Ten-m	0.170624	0.12911	0.363	0.311	1
FBgn0259242	CG42340	CG42340	0.171968	-0.0109309	0.228	0.246	1
FBgn0086677	CG30040	jeb	0.177695	0.25023	0.479	0.431	1
FBgn0039647	CG14509	jus	0.181555	0.0233149	0.254	0.267	1
FBgn0085370	CG34341	Pde11	0.181987	0.0263451	0.15	0.133	1
FBgn0264975	CG1634	Nrg	0.182397	0.0558218	0.228	0.2	1
FBgn0003380	CG12348	Sh	0.182714	1.71164	0.952	0.914	1
FBgn0030174	CG15312	CG15312	0.185371	0.025087	0.202	0.184	1
FBgn0028644	CG4838	beat-Ic	0.185589	0.179254	0.355	0.305	1
FBgn0030723	CG14948	dpr18	0.186894	0.0282986	0.147	0.136	1
FBgn0264895	CG44086	RapGAP1	0.187223	0.101276	0.368	0.347	1
FBgn0041605	CG32490	cpx	0.18919	0.016051	0.905	0.917	1
FBgn0266418	CG45058	wake	0.192392	0.00789087	0.154	0.148	1
FBgn0259243	CG42341	Pka-R1	0.194276	0.0331051	0.394	0.367	1
FBgn0260657	CG42540	CG42540	0.194363	0.137227	0.693	0.675	1
FBgn0052062	CG32062	Rbfox1	0.203921	0.399355	0.814	0.737	1
FBgn0264606	CG43955	Fife	0.205135	-0.00638648	0.518	0.543	1
FBgn0031897	CG13784	CG13784	0.205666	0.035734	0.241	0.22	1
FBgn0261089	CG5559	Sytalpha	0.207149	0.0230618	0.133	0.116	1
FBgn0036165	CG7533	chrb	0.209677	0.305685	0.643	0.588	1
FBgn0270928	CG32848	VAChT	0.212405	0.0206989	0.139	0.132	1
FBgn0051774	CG31774	fred	0.216185	0.0141348	0.217	0.206	1
FBgn0020379	CG6312	Rfx	0.216668	-0.00627947	0.118	0.123	1
FBgn0066101	CG31094	LpR1	0.220275	0.074684	0.203	0.181	1
FBgn0014163	CG4609	fax	0.221007	0.801903	0.774	0.626	1
FBgn0004580	CG6702	Cbp53E	0.22144	0.596384	0.572	0.454	1
FBgn0085412	CG34383	kmr	0.224023	0.0546817	0.255	0.228	1
FBgn0259821	CG42402	CG42402	0.224691	0.209754	0.397	0.327	1
FBgn0031770	CG13995	CG13995	0.225734	0.0255451	0.242	0.221	1
FBgn0013467	CG18285	igl	0.242251	0.412715	0.545	0.454	1
FBgn0083963	CG34127	Nlg3	0.243941	0.0932077	0.528	0.51	1
FBgn0028875	CG32975	nAChRalpha5	0.245038	0.479015	0.8	0.752	1
FBgn0000636	CG5803	Fas3	0.248742	0.0254529	0.226	0.212	1
FBgn0085447	CG34418	sif	0.253158	0.542221	0.594	0.399	1
FBgn0264006	CG43749	dysc	0.253228	0.278446	0.78	0.736	1
FBgn0000036	CG5610	nAChRalpha1	0.255282	0.125547	0.4	0.348	1
FBgn0032151	CG4128	nAChRalpha6	0.255565	0.588316	0.805	0.72	1
FBgn0022382	CG15862	Pka-R2	0.2581	0.204148	0.41	0.315	1
FBgn0053179	CG33179	beat-IIIb	0.258195	0.000693493	0.302	0.308	1
FBgn0052647	CG32647	CG32647	0.259008	0.00573404	0.174	0.177	1
FBgn0030412	CG17762	Tomosyn	0.261082	0.137682	0.622	0.567	1
FBgn0283451	CG11491	br	0.262552	0.1147	0.227	0.206	1
FBgn0050419	CG30419	CG30419	0.262715	0.0102998	0.176	0.168	1
FBgn0027598	CG31012	cindr	0.263641	0.127839	0.454	0.408	1
FBgn0013954	CG11001	Fkbp12	0.264641	-0.174419	0.512	0.569	1
FBgn0260793	CG42573	2mit	0.26748	0.0340476	0.215	0.195	1
FBgn0085400	CG34371	side-V	0.268141	0.0264575	0.181	0.166	1
FBgn0052183	CG32183	Ccn	0.277758	0.0265158	0.167	0.154	1
FBgn0285948	CG15442	RpL27A	0.281173	0.0634414	0.718	0.741	1
FBgn0028369	CG3653	kirre	0.28332	0.197619	0.316	0.227	1
FBgn0052406	CG32406	PVRAP	0.284297	0.0293465	0.15	0.125	1
FBgn0265598	CG44425	Bx	0.289907	0.0357097	0.148	0.143	1
FBgn0015399	CG12283	kek1	0.296195	0.0753395	0.447	0.433	1
FBgn0038237	CG8279	Pde6	0.296786	0.138615	0.469	0.451	1
FBgn0033484	CG2269	CG2269	0.30221	-0.370959	0.886	0.895	1
FBgn0004880	CG1130	scrt	0.303299	0.152165	0.774	0.769	1
FBgn0250908	CG42242	beat-VII	0.306877	0.0260451	0.317	0.291	1
FBgn0263219	CG42330	Dscam4	0.307584	-0.00496748	0.23	0.236	1
FBgn0261588	CG42698	pdm3	0.31517	0.0567895	0.247	0.225	1
FBgn0033192	CG2105	Corin	0.316072	0.107515	0.477	0.448	1
FBgn0011828	CG12002	Pxn	0.321295	-0.0148918	0.093	0.105	1
FBgn0013433	CG4846	beat-Ia	0.326771	-0.000156268	0.189	0.179	1
FBgn0053543	CG33543	CG33543	0.327318	0.0395225	0.365	0.368	1
FBgn0030505	CG11172	NFAT	0.344435	0.103145	0.385	0.335	1
FBgn0024963	CG7535	GluClalpha	0.348098	0.170694	0.658	0.631	1
FBgn0019650	CG11186	toy	0.353677	0.0343919	0.188	0.17	1
FBgn0025885	CG11143	Inos	0.354063	-0.0167246	0.1	0.114	1
FBgn0261871	CG33507	dpr2	0.354444	-0.00430299	0.141	0.141	1
FBgn0039617	CG14521	DIP-gamma	0.356767	0.032364	0.185	0.178	1
FBgn0264574	CG43946	Glut1	0.356908	0.0661894	0.319	0.301	1
FBgn0041707	CG1168	7B2	0.359941	-0.434657	0.843	0.913	1
FBgn0003165	CG9755	pum	0.373443	0.98828	0.822	0.67	1
FBgn0085414	CG34385	dpr12	0.373913	0.0170502	0.43	0.424	1
FBgn0032840	CG13968	sNPF	0.374544	0.0781063	0.183	0.181	1
FBgn0267336	CG34360	Glut4EF	0.375719	0.530891	0.794	0.739	1
FBgn0015229	CG6575	glec	0.375877	0.107646	0.311	0.258	1
FBgn0039064	CG4467	CG4467	0.384035	0.35062	0.513	0.384	1
FBgn0029939	CG9650	CG9650	0.396889	0.0832476	0.116	0.101	1
FBgn0039380	CG5890	CG5890	0.402472	0.0108717	0.242	0.243	1
FBgn0053517	CG33517	Dop2R	0.417328	0.60448	0.935	0.92	1
FBgn0038498	CG14334	beat-IIa	0.423979	0.0890955	0.308	0.264	1
FBgn0264503	CG43902	CG43902	0.426135	0.0964987	0.233	0.192	1
FBgn0083950	CG34114	side-VI	0.427704	0.199257	0.395	0.309	1
FBgn0052600	CG32600	dpr8	0.433393	0.147451	0.435	0.383	1
FBgn0261597	CG10305	RpS26	0.433701	-0.232413	0.792	0.823	1
FBgn0023179	CG6438	amon	0.438752	0.146417	0.419	0.36	1
FBgn0003274	CG4918	RpLP2	0.440014	-0.104151	0.647	0.671	1
FBgn0031697	CG14024	CG14024	0.441521	-0.00777073	0.167	0.178	1
FBgn0033405	CG13954	CG13954	0.447913	0.0139355	0.215	0.207	1
FBgn0035495	CG14989	CG14989	0.452814	0.0962409	0.305	0.258	1
FBgn0033108	CG15236	CG15236	0.453989	0.0939308	0.377	0.351	1
FBgn0260943	CG32169	Rbp6	0.455587	0.594474	0.854	0.796	1
FBgn0050158	CG30158	CG30158	0.464058	-0.00228984	0.106	0.117	1
FBgn0033446	CG1648	CG1648	0.466512	-0.0227085	0.177	0.204	1
FBgn0000097	CG3166	aop	0.468775	-0.00693164	0.184	0.194	1
FBgn0000422	CG10697	Ddc	0.469441	0.181469	0.483	0.458	1
FBgn0083991	CG34155	CG34155	0.46993	-0.0226217	0.142	0.16	1
FBgn0052677	CG32677	X11Lbeta	0.474344	0.117873	0.389	0.342	1
FBgn0017590	CG6669	klg	0.496992	-0.10098	0.507	0.555	1
FBgn0010473	CG15427	tutl	0.499612	0.216685	0.618	0.587	1
FBgn0263289	CG43398	scrib	0.503087	0.0234074	0.16	0.143	1
FBgn0027589	CG1688	CG1688	0.504289	-0.0124043	0.156	0.17	1
FBgn0031414	CG33955	eys	0.506038	0.0276051	0.375	0.361	1
FBgn0029123	CG18024	SoxN	0.513593	0.016877	0.241	0.244	1
FBgn0003091	CG6622	Pkc53E	0.528957	0.212049	0.427	0.354	1
FBgn0261836	CG42768	Msp300	0.529946	0.362865	0.784	0.751	1
FBgn0053147	CG33147	Hs3st-A	0.534785	0.115134	0.392	0.335	1
FBgn0051619	CG31619	nolo	0.540879	0.05503	0.234	0.212	1
FBgn0003429	CG10693	slo	0.548406	0.34981	0.68	0.607	1
FBgn0034636	CG10440	twz	0.548783	-0.00310594	0.091	0.105	1
FBgn0010114	CG2040	hig	0.548866	-0.00149974	0.506	0.512	1
FBgn0052626	CG32626	AMPdeam	0.54915	-0.0105606	0.143	0.152	1
FBgn0260660	CG42543	Mp	0.55035	0.0285624	0.347	0.332	1
FBgn0260941	CG42318	app	0.552223	0.0323925	0.184	0.176	1
FBgn0286778	CG46385	CG46385	0.555023	0.233867	0.464	0.398	1
FBgn0040726	CG13439	dpr1	0.559618	0.08503	0.269	0.223	1
FBgn0010452	CG11280	trn	0.559843	0.00958547	0.111	0.113	1
FBgn0001233	CG1242	Hsp83	0.561433	-0.0718531	0.69	0.706	1
FBgn0085434	CG34405	NaCP60E	0.567202	0.249265	0.624	0.565	1
FBgn0034725	CG6044	CG6044	0.570486	-0.0728088	0.304	0.331	1
FBgn0243512	CG7850	puc	0.572698	-0.0171083	0.127	0.14	1
FBgn0263980	CG43729	Stacl	0.576426	-0.0833814	0.601	0.631	1
FBgn0001186	CG3001	Hex-A	0.585023	0.495322	0.625	0.449	1
FBgn0010415	CG10497	Sdc	0.585753	0.0112349	0.671	0.669	1
FBgn0086778	CG32538	nAChRalpha7	0.591135	0.172339	0.515	0.483	1
FBgn0262593	CG43128	Shab	0.595728	0.0960375	0.388	0.35	1
FBgn0265182	CG44247	CG44247	0.596332	0.0173149	0.306	0.309	1
FBgn0039584	CG14064	beat-VI	0.596889	-0.00185771	0.261	0.264	1
FBgn0052432	CG32432	CG32432	0.603022	0.0133296	0.18	0.179	1
FBgn0020907	CG14904	Scp2	0.609095	-0.0094396	0.143	0.143	1
FBgn0010263	CG3151	Rbp9	0.614546	0.283823	0.56	0.477	1
FBgn0015609	CG7100	CadN	0.623485	0.225439	0.544	0.481	1
FBgn0036844	CG14080	Mkp3	0.62591	0.105853	0.453	0.431	1
FBgn0039089	CG10152	beat-IV	0.626856	0.0210336	0.215	0.204	1
FBgn0005771	CG4491	noc	0.627535	-0.00837528	0.131	0.136	1
FBgn0035041	CG13594	CG13594	0.630237	0.00466999	0.105	0.101	1
FBgn0003423	CG1417	slgA	0.634964	0.182372	0.7	0.67	1
FBgn0266137	CG18741	Dop1R2	0.63844	-0.00796449	0.095	0.105	1
FBgn0265296	CG42256	Dscam2	0.641049	0.148275	0.704	0.692	1
FBgn0000633	CG17716	CG17716	0.656001	0.135552	0.451	0.416	1
FBgn0264386	CG15899	Ca-alpha1T	0.659029	0.579652	0.592	0.486	1
FBgn0038282	CG33485	dpr9	0.66611	0.0599058	0.387	0.364	1
FBgn0261999	CG42817	Ca-Ma2d	0.675967	-0.0228604	0.218	0.227	1
FBgn0029761	CG10706	SK	0.681211	0.348597	0.624	0.529	1
FBgn0004198	CG11387	ct	0.684041	0.158409	0.207	0.156	1
FBgn0037015	CG13253	cmpy	0.697652	0.0284094	0.306	0.304	1
FBgn0264087	CG43756	Slob	0.699521	0.0179591	0.182	0.169	1
FBgn0259171	CG42276	Pde9	0.699828	-0.0740149	0.546	0.568	1
FBgn0040153	CG32597	l(1)G0469	0.703451	0.00487333	0.106	0.103	1
FBgn0004858	CG4220	elB	0.717307	0.0139736	0.17	0.17	1
FBgn0010411	CG8900	RpS18	0.717823	-0.619971	0.83	0.909	1
FBgn0032797	CG10186	Hasp	0.729171	-0.451776	0.814	0.847	1
FBgn0085391	CG34362	trv	0.730691	0.472926	0.558	0.439	1
FBgn0265597	CG44424	rad	0.733104	0.407993	0.597	0.55	1
FBgn0030272	CG15201	CG15201	0.743997	0.0306275	0.116	0.117	1
FBgn0262869	CG43224	Gfrl	0.745521	0.0909797	0.343	0.321	1
FBgn0000037	CG4356	mAChR-A	0.750084	0.0382497	0.43	0.421	1
FBgn0261509	CG14351	haf	0.762483	0.0133121	0.111	0.104	1
FBgn0264273	CG33960	Sema2b	0.762559	0.0621294	0.215	0.202	1
FBgn0011582	CG9652	Dop1R1	0.762782	0.0298736	0.243	0.233	1
FBgn0003435	CG9218	sm	0.763865	0.657837	0.91	0.904	1
FBgn0016061	CG31062	side	0.769676	0.0781753	0.472	0.465	1
FBgn0002945	CG11614	nkd	0.775841	0.0483346	0.251	0.232	1
FBgn0004244	CG10537	Rdl	0.776753	0.310343	0.945	0.958	1
FBgn0259216	CG42316	RhoGAP102A	0.778075	0.0117437	0.101	0.096	1
FBgn0004611	CG4574	Plc21C	0.778441	0.0391443	0.441	0.423	1
FBgn0265487	CG33197	mbl	0.78458	0.127175	0.518	0.487	1
FBgn0032400	CG6770	CG6770	0.78925	0.0995269	0.703	0.694	1
FBgn0041094	CG7590	scyl	0.790946	0.0488209	0.368	0.365	1
FBgn0085419	CG34390	Rgk2	0.804954	0.0114996	0.15	0.15	1
FBgn0011666	CG5099	msi	0.813039	0.42483	0.495	0.326	1
FBgn0000575	CG1007	emc	0.813317	0.0794257	0.373	0.341	1
FBgn0261258	CG6014	rgn	0.816125	0.00788266	0.171	0.171	1
FBgn0036934	CG7395	sNPF-R	0.819017	-0.0047666	0.116	0.125	1
FBgn0000273	CG4379	Pka-C1	0.827815	0.203385	0.584	0.532	1
FBgn0000116	CG32031	Argk	0.830755	0.110422	0.7	0.668	1
FBgn0037521	CG2993	CG2993	0.8448	0.0332734	0.312	0.298	1
FBgn0263397	CG8585	Ih	0.846075	0.334596	0.769	0.708	1
FBgn0029897	CG3203	RpL17	0.84823	-0.269551	0.632	0.712	1
FBgn0023534	CG17778	CG17778	0.850716	0.031228	0.19	0.19	1
FBgn0261698	CG42732	SLO2	0.865788	0.0251696	0.215	0.207	1
FBgn0261788	CG42734	Ank2	0.869551	0.394943	0.784	0.702	1
FBgn0052264	CG32264	CG32264	0.871883	0.431789	0.748	0.692	1
FBgn0085383	CG34354	CG34354	0.876973	0.0427995	0.251	0.239	1
FBgn0005658	CG7018	Ets65A	0.890528	0.0191263	0.105	0.1	1
FBgn0051665	CG31665	wry	0.899095	0.161015	0.425	0.379	1
FBgn0034286	CG33996	dpr13	0.903221	0.0868368	0.359	0.335	1
FBgn0036494	CG7250	Toll-6	0.904942	0.0142322	0.289	0.29	1
FBgn0083949	CG34113	side-III	0.906014	0.0442858	0.464	0.451	1
FBgn0031835	CG11319	CG11319	0.907532	0.0691216	0.326	0.296	1
FBgn0260658	CG42541	CG42541	0.911746	-0.365387	0.534	0.585	1
FBgn0002593	CG4087	RpLP1	0.913604	-0.373202	0.709	0.797	1
FBgn0261556	CG42674	CG42674	0.914073	-0.0765502	0.22	0.245	1
FBgn0267252	CG3694	Ggamma30A	0.92393	-0.236596	0.912	0.907	1
FBgn0264908	CG44099	pHCl-1	0.925497	0.100083	0.267	0.222	1
FBgn0260462	CG12163	CG12163	0.932663	0.00017871	0.152	0.154	1
FBgn0036935	CG14186	CG14186	0.944362	0.0170182	0.204	0.209	1
FBgn0050089	CG30089	CG30089	0.946699	-0.000284896	0.133	0.139	1
FBgn0039816	CG11317	CG11317	0.949587	0.00689305	0.182	0.186	1
FBgn0000024	CG17907	Ace	0.955421	0.11732	0.365	0.313	1
FBgn0040823	CG14162	dpr6	0.957846	-0.00435745	0.238	0.243	1
FBgn0033438	CG1794	Mmp2	0.963164	-0.0412157	0.247	0.259	1
FBgn0038063	CG33976	Octbeta2R	0.964629	0.11891	0.372	0.347	1
FBgn0024841	CG1963	Pcd	0.978097	-0.0258051	0.341	0.344	1
FBgn0005775	CG7503	Con	0.98238	0.348688	0.505	0.43	1
FBgn0266871	CR45332	lncRNA:CR45332	0.985725	0.0167418	0.143	0.142	1
FBgn0010313	CG2530	corto	0.991012	0.021238	0.341	0.335	1

## Sheet: Female_C1
FlyBaseID	GeneID	Gene symbol	p_val	avg_diff	pct.1	pct.2	p_val_adj
FBgn0019660	CR32665	lncRNA:roX2	1.58139e-155	-1.13132	0.003	0.528	2.37208e-152
FBgn0013688	CR34096	mt:srRNA	2.15209e-76	0.112029	0.12	0.021	3.22813e-73
FBgn0085753	CR40596	28SrRNA-Psi:CR40596	4.61548e-67	0.126514	0.124	0.019	6.92322e-64
FBgn0050361	CG30361	mtt	3.65008e-22	0.0805472	0.155	0.097	5.47512e-19
FBgn0000121	CG5962	Arr2	5.32264e-21	-0.0777298	0.048	0.109	7.98396e-18
FBgn0004516	CG14994	Gad1	1.87387e-20	1.88606	0.905	0.876	2.81081e-17
FBgn0264753	CG44011	Rgk1	2.74189e-17	0.0906173	0.143	0.07	4.11283e-14
FBgn0058469	CR40469	lncRNA:CR40469	7.72898e-17	0.0619648	0.126	0.076	1.15935e-13
FBgn0052683	CG32683	CG32683	1.76831e-14	0.0827725	0.164	0.109	2.65247e-11
FBgn0036789	CG13702	AstC-R2	5.44989e-14	0.0809717	0.129	0.078	8.17484e-11
FBgn0267431	CG45784	Myo81F	6.06363e-14	0.0681465	0.14	0.093	9.09544e-11
FBgn0087012	CG1056	5-HT2A	6.62268e-13	0.115101	0.127	0.06	9.93402e-10
FBgn0004652	CG14307	fru	9.77422e-13	0.537105	0.36	0.165	1.46613e-09
FBgn0052982	CG32982	CG32982	7.21931e-12	0.0858104	0.181	0.119	1.0829e-08
FBgn0002940	CG4550	ninaE	1.54433e-11	-0.079003	0.059	0.112	2.31649e-08
FBgn0003301	CG9533	rut	3.93068e-11	0.101249	0.216	0.129	5.89601e-08
FBgn0029768	CG16752	SPR	7.94205e-11	0.0842565	0.155	0.099	1.19131e-07
FBgn0267322	CR45758	lncRNA:CR45758	9.20009e-11	0.0999424	0.189	0.119	1.38001e-07
FBgn0014859	CG1864	Hr38	1.07008e-10	-0.743741	0.371	0.491	1.60512e-07
FBgn0033987	CG12424	ckn	1.36776e-10	0.0494931	0.137	0.096	2.05163e-07
FBgn0052521	CG32521	CG32521	1.43822e-10	0.0740115	0.154	0.093	2.15733e-07
FBgn0085426	CG34397	Rgk3	3.33402e-10	0.0479749	0.103	0.066	5.00103e-07
FBgn0031294	CG31795	IA-2	7.21441e-10	3.01249	0.976	0.948	1.08216e-06
FBgn0261260	CG42611	mgl	7.75188e-10	0.0877181	0.18	0.123	1.16278e-06
FBgn0033368	CG13743	CG13743	1.19685e-09	0.037125	0.184	0.156	1.79527e-06
FBgn0004573	CG12073	5-HT7	1.2323e-09	0.0354327	0.102	0.072	1.84846e-06
FBgn0037963	CG6977	Cad87A	1.3116e-09	0.0483958	0.165	0.126	1.9674e-06
FBgn0052057	CG32057	dpr10	1.90615e-09	0.103369	0.197	0.125	2.85922e-06
FBgn0001226	CG4466	Hsp27	1.92405e-09	-0.214007	0.137	0.213	2.88608e-06
FBgn0013995	CG5685	Calx	2.78898e-09	0.149755	0.238	0.147	4.18348e-06
FBgn0036821	CG3961	CG3961	3.89468e-09	0.0621041	0.172	0.123	5.84202e-06
FBgn0261649	CG31247	tinc	6.39893e-09	0.0687822	0.157	0.107	9.5984e-06
FBgn0283651	CG46301	CG46301	6.68363e-09	0.139403	0.223	0.151	1.00254e-05
FBgn0087002	CG11064	apolpp	8.26838e-09	0.0540517	0.101	0.055	1.24026e-05
FBgn0002543	CG5481	robo2	1.72994e-08	0.0694901	0.115	0.07	2.5949e-05
FBgn0259677	CG42346	CG42346	1.99885e-08	0.0827018	0.174	0.107	2.99828e-05
FBgn0004619	CG8442	GluRIA	2.26119e-08	0.2031	0.312	0.196	3.39178e-05
FBgn0051690	CG31690	CG31690	2.39683e-08	0.101917	0.262	0.192	3.59525e-05
FBgn0039349	CG4685	Ssadh	4.1763e-08	-0.169427	0.357	0.458	6.26445e-05
FBgn0042696	CG2380	NfI	4.48724e-08	0.0749282	0.199	0.14	6.73086e-05
FBgn0065099	CR33925	snRNA:7SK	4.96189e-08	2.71501	0.667	0.396	7.44284e-05
FBgn0283499	CG18402	InR	6.48598e-08	0.0708639	0.226	0.17	9.72897e-05
FBgn0035495	CG14989	CG14989	6.4868e-08	-0.648791	0.999	1	9.7302e-05
FBgn0053087	CG33087	LRP1	6.97938e-08	0.0359623	0.108	0.08	0.000104691
FBgn0267910	CR34335	lncRNA:CR34335	9.42031e-08	3.95374	0.975	0.843	0.000141305
FBgn0000064	CG6058	Ald1	9.68892e-08	-1.19991	0.759	0.845	0.000145334
FBgn0040877	CG12994	CG12994	1.06662e-07	0.0570546	0.102	0.064	0.000159992
FBgn0265052	CG44167	St3	1.10726e-07	0.0389634	0.161	0.129	0.000166089
FBgn0051092	CG31092	LpR2	2.68412e-07	0.0199209	0.137	0.126	0.000402618
FBgn0031299	CG4629	CG4629	3.0334e-07	0.0344064	0.147	0.117	0.00045501
FBgn0260971	CG42594	CG42594	3.24382e-07	0.161978	0.272	0.175	0.000486573
FBgn0260442	CG6831	rhea	3.6119e-07	0.0380108	0.129	0.098	0.000541785
FBgn0264794	CR44024	lncRNA:CR44024	3.65563e-07	0.190556	0.341	0.257	0.000548345
FBgn0033356	CG8229	CG8229	3.83291e-07	-0.0728917	0.115	0.175	0.000574936
FBgn0262473	CG5490	Tl	4.00027e-07	0.06207	0.146	0.097	0.000600041
FBgn0267252	CG3694	Ggamma30A	5.91569e-07	0.354997	0.884	0.882	0.000887353
FBgn0051163	CG31163	SKIP	7.78212e-07	0.214085	0.367	0.249	0.00116732
FBgn0026411	CG11354	Lim1	9.78866e-07	0.178974	0.194	0.121	0.0014683
FBgn0031698	CG1402	Ncoa6	1.18104e-06	0.132057	0.147	0.089	0.00177155
FBgn0051814	CG31814	DIP-kappa	1.47949e-06	0.117144	0.222	0.161	0.00221923
FBgn0029663	CG10804	CG10804	1.72877e-06	0.428943	0.645	0.52	0.00259315
FBgn0266377	CG45019	Pde8	2.07026e-06	0.0430634	0.12	0.085	0.00310539
FBgn0050463	CG30463	Pgant9	2.22442e-06	0.0794487	0.231	0.17	0.00333663
FBgn0260003	CG34157	Dys	2.37575e-06	0.0409074	0.141	0.105	0.00356363
FBgn0041097	CG5423	robo3	2.75668e-06	0.0661313	0.181	0.132	0.00413502
FBgn0267001	CG42338	Ten-a	3.36856e-06	1.57542	0.895	0.759	0.00505283
FBgn0024189	CG33141	sns	4.07409e-06	0.0408723	0.138	0.098	0.00611113
FBgn0050115	CG30115	GEFmeso	5.10021e-06	0.0484338	0.112	0.075	0.00765031
FBgn0004395	CG4620	unk	6.11693e-06	0.0582534	0.162	0.123	0.00917539
FBgn0260657	CG42540	CG42540	6.48728e-06	0.348451	0.643	0.573	0.00973092
FBgn0283451	CG11491	br	6.85801e-06	0.295939	0.232	0.167	0.010287
FBgn0025525	CG9102	bab2	6.97805e-06	0.0426044	0.104	0.07	0.0104671
FBgn0262018	CG42829	CadN2	7.44454e-06	0.0648955	0.169	0.115	0.0111668
FBgn0004595	CG17228	pros	9.4711e-06	4.36749	0.875	0.842	0.0142066
FBgn0033159	CG17800	Dscam1	9.73276e-06	0.0432018	0.189	0.157	0.0145991
FBgn0027356	CG8604	Amph	9.79659e-06	0.0548626	0.153	0.11	0.0146949
FBgn0263873	CG43720	sick	1.06852e-05	0.0364926	0.103	0.072	0.0160277
FBgn0085399	CG34370	CG34370	1.11335e-05	0.0507285	0.147	0.119	0.0167002
FBgn0261552	CG42670	ps	1.37444e-05	0.177555	0.934	0.949	0.0206165
FBgn0261285	CG5629	Ppcs	1.45484e-05	0.0346892	0.136	0.11	0.0218226
FBgn0034138	CG8332	RpS15	1.49065e-05	-0.810566	0.863	0.922	0.0223598
FBgn0025382	CG14791	Rab27	1.62142e-05	-0.0267487	0.085	0.111	0.0243213
FBgn0260429	CG42524	CG42524	1.9206e-05	0.0607264	0.172	0.125	0.0288091
FBgn0261090	CG42333	Sytbeta	2.63636e-05	0.0402366	0.121	0.092	0.0395454
FBgn0036454	CG17839	CG17839	2.91865e-05	0.0419307	0.157	0.122	0.0437798
FBgn0004910	CG15855	Eip63F-1	3.32427e-05	0.0833354	0.2	0.146	0.0498641
FBgn0267428	CG45781	DIP-lambda	3.35682e-05	0.0886369	0.133	0.088	0.0503523
FBgn0053126	CG33126	NLaz	3.96748e-05	-0.0556493	0.083	0.107	0.0595123
FBgn0265194	CG44240	Trpm	4.79974e-05	0.037234	0.113	0.085	0.0719961
FBgn0028888	CG4168	CG4168	4.89322e-05	0.0398484	0.116	0.085	0.0733983
FBgn0038246	CG14853	CG14853	5.91173e-05	0.049458	0.121	0.084	0.088676
FBgn0045038	CG7105	Proc	6.09522e-05	-0.12448	0.163	0.162	0.0914283
FBgn0085397	CG34368	Fili	9.92193e-05	0.0688891	0.131	0.083	0.148829
FBgn0029897	CG3203	RpL17	0.000131016	-0.494255	0.682	0.767	0.196524
FBgn0034978	CG3257	CG3257	0.000140014	-0.0255507	0.163	0.192	0.210022
FBgn0052206	CG32206	CG32206	0.000153027	0.0866211	0.235	0.165	0.229541
FBgn0265595	CG44422	CG44422	0.000167119	0.224969	0.303	0.19	0.250679
FBgn0263219	CG42330	Dscam4	0.000177981	-0.0138941	0.209	0.195	0.266972
FBgn0261788	CG42734	Ank2	0.000178075	0.620264	0.78	0.672	0.267113
FBgn0004168	CG16720	5-HT1A	0.000187838	0.0987729	0.233	0.167	0.281757
FBgn0285952	CG3186	eEF5	0.000198383	-0.0250966	0.275	0.31	0.297574
FBgn0011818	CG9884	oaf	0.000198435	0.0627401	0.163	0.123	0.297652
FBgn0263257	CG43395	Cngl	0.000212389	0.990658	0.768	0.625	0.318583
FBgn0259212	CG42312	cno	0.000220126	0.0539447	0.127	0.086	0.33019
FBgn0040297	CG9256	Nhe2	0.000227029	0.042321	0.126	0.097	0.340543
FBgn0013686	CR34094	mt:lrRNA	0.000255624	5.88942	0.849	0.467	0.383437
FBgn0031530	CG3254	Pgant2	0.000268656	0.0215814	0.141	0.121	0.402984
FBgn0013576	CG32464	mtd	0.000312878	0.69264	0.824	0.773	0.469317
FBgn0031738	CG9171	CG9171	0.000315033	0.0395653	0.135	0.099	0.47255
FBgn0029824	CG3726	CG3726	0.000402895	0.108563	0.194	0.12	0.604342
FBgn0262782	CG5362	Mdh1	0.000421438	-0.0761112	0.22	0.273	0.632157
FBgn0038839	CG10830	Ktl	0.000507006	0.0520994	0.27	0.258	0.760509
FBgn0262160	CG9932	CG9932	0.000538348	0.104991	0.258	0.185	0.807522
FBgn0261648	CG6464	salm	0.000551185	0.0547925	0.107	0.079	0.826777
FBgn0250910	CG42244	Octbeta3R	0.000575375	0.0372661	0.186	0.158	0.863063
FBgn0033403	CG13739	CG13739	0.00058208	0.321133	0.359	0.244	0.873121
FBgn0040765	CG33473	luna	0.000686227	0.192462	0.35	0.262	1
FBgn0000547	CG12676	ed	0.000776057	0.079307	0.224	0.176	1
FBgn0001186	CG3001	Hex-A	0.00113341	0.699425	0.702	0.517	1
FBgn0024963	CG7535	GluClalpha	0.00121113	0.376848	0.689	0.61	1
FBgn0002643	CG8118	mam	0.00148228	0.0684616	0.209	0.159	1
FBgn0052698	CG32698	CARPB	0.00151448	0.107783	0.159	0.12	1
FBgn0016797	CG9739	fz2	0.00154154	0.153284	0.288	0.219	1
FBgn0259234	CG42332	Camta	0.00164833	0.0353581	0.186	0.154	1
FBgn0000287	CG4881	salr	0.00165784	0.125695	0.179	0.135	1
FBgn0034753	CG2852	CG2852	0.00190222	-0.281114	0.459	0.577	1
FBgn0085380	CG34351	CG34351	0.00209564	0.0190033	0.116	0.094	1
FBgn0086604	CG12484	side-VIII	0.00218984	0.0356397	0.202	0.175	1
FBgn0031424	CG9887	VGlut	0.00224684	0.163287	0.123	0.083	1
FBgn0028481	CG4341	CG4341	0.00225483	0.123822	0.249	0.177	1
FBgn0000024	CG17907	Ace	0.00228083	0.209489	0.369	0.292	1
FBgn0051324	CG31324	CG31324	0.00231732	0.0678619	0.196	0.147	1
FBgn0267033	CG45477	mamo	0.00245252	0.663271	0.488	0.377	1
FBgn0052264	CG32264	CG32264	0.0027068	0.619653	0.785	0.713	1
FBgn0015774	CG10521	NetB	0.00271085	0.180734	0.302	0.236	1
FBgn0023095	CG11282	caps	0.00277581	0.04716	0.152	0.128	1
FBgn0264090	CG43759	CG43759	0.00291252	0.0732671	0.19	0.146	1
FBgn0020269	CG10145	mspo	0.00302197	0.0445076	0.205	0.172	1
FBgn0264895	CG44086	RapGAP1	0.00303724	0.18949	0.389	0.339	1
FBgn0263353	CG11000	CG11000	0.00325777	0.0540277	0.508	0.474	1
FBgn0263392	CG43444	Tet	0.00329079	0.120693	0.535	0.478	1
FBgn0011224	CG31000	heph	0.00339377	0.674328	0.499	0.425	1
FBgn0085382	CG34353	CG34353	0.00342595	0.0868682	0.216	0.162	1
FBgn0261262	CG42613	CG42613	0.00343432	0.29756	0.526	0.392	1
FBgn0003499	CG7847	sr	0.00378475	0.0392352	0.281	0.252	1
FBgn0001297	CG33956	kay	0.00380275	0.0407315	0.123	0.088	1
FBgn0264308	CG43778	CG43778	0.00387924	0.146467	0.289	0.214	1
FBgn0035032	CG4692	ATPsynF	0.00391053	-0.828548	0.827	0.891	1
FBgn0036935	CG14186	CG14186	0.00400268	-0.0205722	0.208	0.224	1
FBgn0260658	CG42541	CG42541	0.00410778	-0.324589	0.447	0.468	1
FBgn0259111	CG42253	Ndae1	0.00417133	0.0174479	0.138	0.119	1
FBgn0052204	CG32204	CG32204	0.00477852	0.0616817	0.127	0.089	1
FBgn0085385	CG34356	bma	0.00501627	0.0226764	0.126	0.107	1
FBgn0004607	CG1449	zfh2	0.00504878	0.0392819	0.113	0.09	1
FBgn0266100	CG44837	CG44837	0.00552485	0.0359255	0.143	0.117	1
FBgn0001085	CG17697	fz	0.00559179	0.0485	0.203	0.169	1
FBgn0011676	CG6713	Nos	0.00563831	0.0887426	0.116	0.084	1
FBgn0032833	CG10664	COX4	0.00581868	-1.15356	0.821	0.908	1
FBgn0015519	CG2302	nAChRalpha3	0.00609124	0.149221	0.308	0.243	1
FBgn0036144	CG6207	GlcAT-P	0.00627672	0.114455	0.324	0.26	1
FBgn0053517	CG33517	Dop2R	0.00629153	1.62346	0.904	0.869	1
FBgn0003380	CG12348	Sh	0.00634572	1.66494	0.957	0.908	1
FBgn0263773	CG43690	fok	0.00670185	0.0270917	0.167	0.145	1
FBgn0005636	CG3385	nvy	0.00728754	-0.046719	0.241	0.276	1
FBgn0031835	CG11319	CG11319	0.00741915	0.182106	0.383	0.308	1
FBgn0263397	CG8585	Ih	0.00892625	0.495256	0.853	0.795	1
FBgn0259243	CG42341	Pka-R1	0.00903913	-0.0305389	0.287	0.296	1
FBgn0051646	CG31646	DIP-theta	0.00965728	0.104531	0.194	0.151	1
FBgn0085434	CG34405	NaCP60E	0.00966928	0.372225	0.684	0.636	1
FBgn0259170	CG42275	alpha-Man-Ia	0.0100391	0.0580407	0.18	0.139	1
FBgn0000635	CG3665	Fas2	0.0101909	0.0922695	0.276	0.22	1
FBgn0259245	CG42343	DIP-beta	0.0109349	0.0900832	0.164	0.127	1
FBgn0019985	CG11144	mGluR	0.0111645	0.117068	0.335	0.282	1
FBgn0259108	CG34387	futsch	0.0113884	0.652214	0.94	0.901	1
FBgn0027608	CG2082	CG2082	0.0115022	0.0436173	0.311	0.297	1
FBgn0033544	CG7220	CG7220	0.0116506	-0.0816215	0.19	0.255	1
FBgn0036165	CG7533	chrb	0.0118183	0.418089	0.67	0.549	1
FBgn0040397	CG3655	CG3655	0.0119948	0.0618911	0.182	0.14	1
FBgn0267579	CR45919	lncRNA:CR45919	0.0121707	0.0157536	0.104	0.091	1
FBgn0032400	CG6770	CG6770	0.0140807	0.0623806	0.667	0.659	1
FBgn0085395	CG34366	Shawl	0.0142589	0.0216165	0.145	0.126	1
FBgn0001225	CG4183	Hsp26	0.0142742	-0.220934	0.175	0.236	1
FBgn0263930	CG4974	dally	0.0143328	0.0402675	0.216	0.178	1
FBgn0259821	CG42402	CG42402	0.014595	0.228532	0.358	0.277	1
FBgn0035816	CG13685	CG13685	0.0146598	0.0149037	0.151	0.14	1
FBgn0264574	CG43946	Glut1	0.0149667	0.156673	0.366	0.28	1
FBgn0262636	CG2052	dati	0.0152402	0.243258	0.44	0.375	1
FBgn0026160	CG7958	tna	0.0164663	0.181721	0.392	0.29	1
FBgn0039209	CG13624	REPTOR	0.0177689	0.0669428	0.21	0.168	1
FBgn0264442	CG43860	ab	0.0184297	-0.127526	0.323	0.381	1
FBgn0260941	CG42318	app	0.0191799	0.0681761	0.247	0.203	1
FBgn0262738	CG3620	norpA	0.0192868	0.0418771	0.448	0.448	1
FBgn0003165	CG9755	pum	0.0201853	0.835786	0.785	0.587	1
FBgn0031736	CG11030	CG11030	0.0212657	0.142121	0.298	0.237	1
FBgn0032629	CG15138	beat-IIIc	0.0212938	0.170911	0.288	0.239	1
FBgn0284245	CG8280	eEF1alpha1	0.0214048	-0.0239666	0.279	0.303	1
FBgn0261549	CG42667	rdgA	0.0222088	0.122406	0.262	0.204	1
FBgn0029123	CG18024	SoxN	0.0223351	0.048003	0.198	0.166	1
FBgn0260943	CG32169	Rbp6	0.0230463	1.1375	0.928	0.867	1
FBgn0085420	CG34391	DIP-delta	0.0232676	0.211503	0.305	0.259	1
FBgn0035499	CG14996	Chd64	0.0234242	0.0238429	0.137	0.122	1
FBgn0040153	CG32597	l(1)G0469	0.0246505	0.035362	0.103	0.077	1
FBgn0086680	CG10037	vvl	0.0251131	0.0976773	0.167	0.136	1
FBgn0039346	CG5079	CG5079	0.0251687	-0.0271735	0.104	0.128	1
FBgn0027654	CG2239	jdp	0.0259315	-0.339808	0.589	0.621	1
FBgn0001091	CG12055	Gapdh1	0.0267846	-0.206738	0.382	0.48	1
FBgn0264339	CG43795	CG43795	0.028444	-0.0982294	0.197	0.237	1
FBgn0265598	CG44425	Bx	0.0287982	0.00248435	0.302	0.328	1
FBgn0264490	CG18389	Eip93F	0.0299256	0.249023	0.29	0.213	1
FBgn0029761	CG10706	SK	0.0304864	0.420177	0.641	0.559	1
FBgn0039054	CG13830	Cow	0.0309753	0.24965	0.526	0.439	1
FBgn0266851	CR45312	lncRNA:CR45312	0.0312185	-0.073463	0.208	0.257	1
FBgn0002593	CG4087	RpLP1	0.0317974	-0.452815	0.713	0.816	1
FBgn0003975	CG3830	vg	0.032637	0.0291744	0.125	0.111	1
FBgn0010452	CG11280	trn	0.0332265	0.0123957	0.118	0.111	1
FBgn0085447	CG34418	sif	0.0335362	0.653748	0.676	0.435	1
FBgn0004885	CG6863	tok	0.0338196	0.00441059	0.132	0.125	1
FBgn0265002	CG44153	CG44153	0.0339499	-0.0166864	0.214	0.237	1
FBgn0037153	CG12673	olf413	0.0341414	0.0608582	0.324	0.292	1
FBgn0011666	CG5099	msi	0.0365106	0.472477	0.564	0.367	1
FBgn0031414	CG33955	eys	0.0401552	0.0722195	0.419	0.382	1
FBgn0013973	CG1470	Gycbeta100B	0.040419	0.0386091	0.18	0.148	1
FBgn0259789	CG12701	zld	0.0422257	0.0744318	0.206	0.17	1
FBgn0261509	CG14351	haf	0.0422824	0.00734249	0.146	0.128	1
FBgn0024841	CG1963	Pcd	0.0433451	-0.00714627	0.208	0.218	1
FBgn0085387	CG34358	shakB	0.0458993	0.246889	0.562	0.488	1
FBgn0001234	CR31400	lncRNA:Hsromega	0.0461099	2.12927	0.985	0.983	1
FBgn0262508	CG43078	CG43078	0.0461873	-0.0120521	0.111	0.12	1
FBgn0016061	CG31062	side	0.0475013	0.00756328	0.48	0.46	1
FBgn0005771	CG4491	noc	0.0475582	-0.0271394	0.139	0.16	1
FBgn0010313	CG2530	corto	0.0484331	0.0660495	0.362	0.341	1
FBgn0052017	CG32017	CG32017	0.0502839	0.386541	0.784	0.735	1
FBgn0243512	CG7850	puc	0.0507231	-0.0165396	0.117	0.138	1
FBgn0052066	CG32066	CG32066	0.0511923	0.0243027	0.125	0.106	1
FBgn0031374	CG7337	Wdr62	0.0514927	-0.0398373	0.392	0.419	1
FBgn0085407	CG34378	Pvf3	0.0532522	0.352135	0.47	0.397	1
FBgn0031016	CG12199	kek5	0.0538035	0.0268113	0.121	0.101	1
FBgn0033250	CG14762	CG14762	0.0549538	0.0271265	0.161	0.149	1
FBgn0051760	CG31760	CG31760	0.0556244	0.0572622	0.192	0.166	1
FBgn0261046	CG31190	Dscam3	0.0557402	0.0201309	0.167	0.158	1
FBgn0051774	CG31774	fred	0.0563133	0.0674	0.234	0.193	1
FBgn0085432	CG34403	pan	0.0570224	0.732946	0.715	0.536	1
FBgn0027339	CG11352	jim	0.0571248	2.34186	0.937	0.895	1
FBgn0052600	CG32600	dpr8	0.0596901	0.144373	0.418	0.365	1
FBgn0028704	CG18660	Nckx30C	0.0602568	0.30784	0.748	0.709	1
FBgn0285926	CG1691	Imp	0.0622743	0.170243	0.227	0.181	1
FBgn0286778	CG46385	CG46385	0.0624977	0.243791	0.433	0.341	1
FBgn0052406	CG32406	PVRAP	0.0627275	0.0259252	0.163	0.15	1
FBgn0017590	CG6669	klg	0.0633671	-0.120768	0.524	0.527	1
FBgn0040805	CG12355	CG12355	0.0637203	-0.0324744	0.143	0.167	1
FBgn0259242	CG42340	CG42340	0.0640768	0.0184323	0.227	0.225	1
FBgn0014163	CG4609	fax	0.0648615	0.489643	0.605	0.426	1
FBgn0030913	CG6123	CG6123	0.0672708	0.0859809	0.27	0.228	1
FBgn0003326	CG17579	sca	0.0690357	0.0533069	0.158	0.127	1
FBgn0038282	CG33485	dpr9	0.0703363	0.101059	0.376	0.358	1
FBgn0265296	CG42256	Dscam2	0.0709924	0.343693	0.733	0.692	1
FBgn0013954	CG11001	Fkbp12	0.0714189	-0.243418	0.423	0.521	1
FBgn0025885	CG11143	Inos	0.0726861	-0.0265717	0.082	0.104	1
FBgn0036801	CG6896	MYPT-75D	0.0755973	0.0589565	0.223	0.194	1
FBgn0003429	CG10693	slo	0.0766767	0.386466	0.693	0.612	1
FBgn0032797	CG10186	Hasp	0.0770144	-0.725	0.862	0.909	1
FBgn0261113	CG17836	Xrp1	0.0795213	-0.000928372	0.221	0.221	1
FBgn0030412	CG17762	Tomosyn	0.0810017	0.216047	0.605	0.508	1
FBgn0266801	CG45263	CG45263	0.0818937	-0.142487	0.462	0.499	1
FBgn0284243	CG9277	betaTub56D	0.085474	-0.254934	0.426	0.499	1
FBgn0053179	CG33179	beat-IIIb	0.0856885	0.00517959	0.281	0.267	1
FBgn0004580	CG6702	Cbp53E	0.0861447	0.605784	0.535	0.461	1
FBgn0037171	CG14459	CG14459	0.0869027	0.0250043	0.154	0.145	1
FBgn0050089	CG30089	CG30089	0.0871861	0.0244789	0.13	0.112	1
FBgn0003360	CG16944	sesB	0.088192	0.0298481	0.88	0.902	1
FBgn0263706	CG43658	CG43658	0.0892068	0.036773	0.136	0.117	1
FBgn0033249	CG11191	CG11191	0.0898903	-0.0287975	0.082	0.105	1
FBgn0030897	CG5744	Frq1	0.0927036	0.529624	0.672	0.539	1
FBgn0000633	CG17716	CG17716	0.0947698	0.207677	0.411	0.362	1
FBgn0053147	CG33147	Hs3st-A	0.0965397	0.155574	0.424	0.341	1
FBgn0028875	CG32975	nAChRalpha5	0.0965406	0.554374	0.769	0.69	1
FBgn0035756	CG32381	unc-13-4A	0.0983978	0.0879251	0.256	0.211	1
FBgn0261574	CG7749	kug	0.100879	0.0469117	0.157	0.137	1
FBgn0051619	CG31619	nolo	0.102189	0.0665522	0.22	0.185	1
FBgn0004449	CG5723	Ten-m	0.102339	0.148227	0.384	0.313	1
FBgn0261836	CG42768	Msp300	0.102722	0.68216	0.843	0.788	1
FBgn0010114	CG2040	hig	0.10382	0.00147838	0.517	0.495	1
FBgn0033192	CG2105	Corin	0.105504	0.10808	0.491	0.469	1
FBgn0066084	CG30425	RpL41	0.107198	1.38216	0.853	0.574	1
FBgn0027589	CG1688	CG1688	0.110559	-0.0235727	0.143	0.171	1
FBgn0000097	CG3166	aop	0.110654	-0.0298972	0.175	0.188	1
FBgn0264087	CG43756	Slob	0.110878	0.0421063	0.182	0.154	1
FBgn0086778	CG32538	nAChRalpha7	0.112993	0.262709	0.603	0.534	1
FBgn0261999	CG42817	Ca-Ma2d	0.113777	0.00182918	0.181	0.186	1
FBgn0083975	CG34139	Nlg4	0.114772	0.0134885	0.187	0.183	1
FBgn0010434	CG11949	cora	0.114813	0.0214403	0.138	0.123	1
FBgn0038653	CG18208	Octalpha2R	0.117389	0.142072	0.403	0.353	1
FBgn0037525	CG17816	CG17816	0.118274	0.18895	0.55	0.497	1
FBgn0010300	CG10719	brat	0.118456	0.21066	0.321	0.221	1
FBgn0051221	CG31221	CG31221	0.118867	0.622611	0.573	0.432	1
FBgn0261556	CG42674	CG42674	0.119478	-0.114523	0.265	0.321	1
FBgn0040823	CG14162	dpr6	0.121726	-0.0422003	0.289	0.32	1
FBgn0264975	CG1634	Nrg	0.121796	0.0258896	0.189	0.172	1
FBgn0023179	CG6438	amon	0.129859	0.112193	0.343	0.305	1
FBgn0032901	CG9339	sky	0.131377	0.0562919	0.477	0.462	1
FBgn0038826	CG17838	Syp	0.131632	0.216718	0.545	0.509	1
FBgn0003435	CG9218	sm	0.131849	0.88945	0.911	0.882	1
FBgn0085421	CG34392	Epac	0.13309	0.0541544	0.163	0.127	1
FBgn0028370	CG4192	kek3	0.134207	0.0252563	0.129	0.107	1
FBgn0037475	CG33323	Fer1	0.136125	-0.0505368	0.132	0.129	1
FBgn0014184	CG16747	Oda	0.137583	0.197204	0.704	0.65	1
FBgn0032151	CG4128	nAChRalpha6	0.137794	0.455548	0.736	0.657	1
FBgn0052432	CG32432	CG32432	0.138483	0.0548932	0.236	0.205	1
FBgn0003274	CG4918	RpLP2	0.140134	-0.107935	0.598	0.629	1
FBgn0010473	CG15427	tutl	0.141939	0.260057	0.659	0.601	1
FBgn0261588	CG42698	pdm3	0.144536	0.0803271	0.249	0.215	1
FBgn0032840	CG13968	sNPF	0.148661	0.015954	0.117	0.137	1
FBgn0039420	CG6154	CG6154	0.151632	0.0318603	0.174	0.162	1
FBgn0015777	CG9261	nrv2	0.153495	0.0240193	0.128	0.111	1
FBgn0261698	CG42732	SLO2	0.153907	0.0778927	0.257	0.206	1
FBgn0264273	CG33960	Sema2b	0.159549	0.0455295	0.243	0.218	1
FBgn0038321	CG6218	CG6218	0.163685	-0.00208861	0.109	0.107	1
FBgn0001078	CG4059	ftz-f1	0.166974	0.0836862	0.262	0.218	1
FBgn0013981	CG3379	His4r	0.172544	-0.371719	0.945	0.964	1
FBgn0267668	CR46006	lncRNA:CR46006	0.175039	0.0586432	0.127	0.096	1
FBgn0266137	CG18741	Dop1R2	0.179096	-0.0226518	0.114	0.13	1
FBgn0001224	CG4463	Hsp23	0.183046	-0.18578	0.169	0.207	1
FBgn0051361	CG31361	dpr17	0.186329	-0.00187981	0.166	0.16	1
FBgn0032048	CG13094	Dh31	0.188643	-0.0828324	0.102	0.112	1
FBgn0025682	CG9148	scf	0.19569	-0.0116626	0.096	0.105	1
FBgn0037676	CG8861	CG8861	0.197004	-0.0323546	0.354	0.348	1
FBgn0030272	CG15201	CG15201	0.198678	0.0405536	0.114	0.099	1
FBgn0066101	CG31094	LpR1	0.21165	0.0652433	0.255	0.229	1
FBgn0270928	CG32848	VAChT	0.213538	0.028364	0.131	0.114	1
FBgn0261928	CG42795	CG42795	0.220668	0.0738971	0.307	0.27	1
FBgn0036844	CG14080	Mkp3	0.222355	0.134373	0.454	0.397	1
FBgn0038494	CG4135	beat-IIb	0.227885	0.0066376	0.107	0.103	1
FBgn0261089	CG5559	Sytalpha	0.229628	0.00907521	0.115	0.102	1
FBgn0266418	CG45058	wake	0.230332	0.0170947	0.133	0.115	1
FBgn0262737	CG7437	mub	0.231313	0.53376	0.629	0.488	1
FBgn0052626	CG32626	AMPdeam	0.235001	-0.0314499	0.145	0.171	1
FBgn0010411	CG8900	RpS18	0.237645	-0.693049	0.841	0.917	1
FBgn0264000	CG43743	GluRIB	0.243111	0.250329	0.402	0.309	1
FBgn0261597	CG10305	RpS26	0.243883	-0.208689	0.791	0.812	1
FBgn0044328	CG32052	CG32052	0.24566	-0.0156262	0.222	0.237	1
FBgn0004611	CG4574	Plc21C	0.246308	0.0206836	0.396	0.406	1
FBgn0037913	CG6783	fabp	0.246387	-0.0283409	0.141	0.148	1
FBgn0019643	CG3318	AANAT1	0.246411	-0.0537467	0.192	0.224	1
FBgn0000179	CG3578	bi	0.249397	0.152542	0.205	0.175	1
FBgn0261988	CG17998	Gprk2	0.250197	0.157131	0.412	0.328	1
FBgn0039816	CG11317	CG11317	0.250423	0.0173769	0.134	0.119	1
FBgn0010263	CG3151	Rbp9	0.257187	0.232126	0.508	0.428	1
FBgn0083991	CG34155	CG34155	0.279778	-0.0412381	0.136	0.145	1
FBgn0083950	CG34114	side-VI	0.280253	0.117102	0.353	0.297	1
FBgn0285944	CG9907	para	0.281688	1.04625	0.871	0.781	1
FBgn0033268	CG2297	Obp44a	0.282843	-0.097207	0.157	0.177	1
FBgn0003091	CG6622	Pkc53E	0.285013	0.263221	0.457	0.357	1
FBgn0004880	CG1130	scrt	0.287081	0.127593	0.873	0.878	1
FBgn0267336	CG34360	Glut4EF	0.287365	0.503219	0.753	0.665	1
FBgn0022382	CG15862	Pka-R2	0.288754	0.0921625	0.312	0.269	1
FBgn0259213	CG42313	side-II	0.290588	-0.0483895	0.356	0.394	1
FBgn0039089	CG10152	beat-IV	0.292641	-0.0346334	0.192	0.224	1
FBgn0034408	CG12758	sano	0.292682	0.0148345	0.104	0.094	1
FBgn0035171	CG12502	CG12502	0.296056	-0.00947245	0.101	0.111	1
FBgn0053202	CG33202	dpr11	0.300364	0.0012591	0.267	0.273	1
FBgn0053516	CG33516	dpr3	0.302552	0.0145508	0.125	0.119	1
FBgn0030505	CG11172	NFAT	0.305986	0.0665144	0.293	0.252	1
FBgn0031697	CG14024	CG14024	0.309802	-0.00124112	0.117	0.118	1
FBgn0086359	CG3953	Invadolysin	0.309851	0.0163869	0.151	0.151	1
FBgn0050419	CG30419	CG30419	0.312586	0.00787064	0.147	0.16	1
FBgn0005775	CG7503	Con	0.313428	0.318439	0.426	0.33	1
FBgn0004242	CG3139	Syt1	0.31458	0.666681	0.895	0.872	1
FBgn0259171	CG42276	Pde9	0.320057	0.0206009	0.502	0.497	1
FBgn0262614	CG43140	pyd	0.323296	0.0629498	0.187	0.162	1
FBgn0015609	CG7100	CadN	0.33096	0.184258	0.491	0.413	1
FBgn0004514	CG7485	Oct-TyrR	0.335887	0.00815463	0.149	0.14	1
FBgn0011661	CG10701	Moe	0.336838	-0.0238911	0.189	0.214	1
FBgn0085383	CG34354	CG34354	0.33992	0.0795152	0.28	0.24	1
FBgn0052677	CG32677	X11Lbeta	0.342219	0.0971759	0.384	0.334	1
FBgn0004858	CG4220	elB	0.344284	0.00910757	0.188	0.185	1
FBgn0052647	CG32647	CG32647	0.345211	0.040902	0.255	0.226	1
FBgn0039380	CG5890	CG5890	0.347401	0.0266648	0.228	0.22	1
FBgn0031897	CG13784	CG13784	0.35138	-0.0161553	0.227	0.235	1
FBgn0034286	CG33996	dpr13	0.357647	0.110105	0.334	0.299	1
FBgn0002945	CG11614	nkd	0.358472	0.0425233	0.306	0.287	1
FBgn0085370	CG34341	Pde11	0.359412	0.0204152	0.141	0.127	1
FBgn0250867	CG42238	CG42238	0.365185	0.035853	0.179	0.161	1
FBgn0031306	CG4577	CG4577	0.365557	0.182602	0.301	0.248	1
FBgn0033791	CG3915	Drl-2	0.369339	0.0352185	0.138	0.119	1
FBgn0014343	CG10601	mirr	0.378185	0.0400889	0.176	0.178	1
FBgn0000042	CG4027	Act5C	0.3794	0.0626179	0.702	0.715	1
FBgn0031971	CG7224	Sirup	0.382595	-0.0366442	0.158	0.191	1
FBgn0085412	CG34383	kmr	0.385501	0.0520646	0.284	0.252	1
FBgn0000535	CG10952	eag	0.388478	0.10308	0.308	0.255	1
FBgn0083228	CG5907	Frq2	0.399183	0.134665	0.308	0.24	1
FBgn0033438	CG1794	Mmp2	0.406184	-0.0546334	0.247	0.269	1
FBgn0035041	CG13594	CG13594	0.40994	-0.000781582	0.113	0.116	1
FBgn0053543	CG33543	CG33543	0.411205	0.0460825	0.367	0.359	1
FBgn0263772	CG43689	CG43689	0.412744	0.0629157	0.102	0.087	1
FBgn0010415	CG10497	Sdc	0.415242	0.0100935	0.669	0.642	1
FBgn0285948	CG15442	RpL27A	0.415991	-0.000618315	0.715	0.752	1
FBgn0037941	CG12594	CG12594	0.416519	0.0626967	0.25	0.233	1
FBgn0013733	CG18076	shot	0.416957	0.0980991	0.312	0.255	1
FBgn0002868	CG9470	MtnA	0.41698	0.149649	0.212	0.135	1
FBgn0037874	CG4800	Tctp	0.420868	0.0302986	0.344	0.318	1
FBgn0264815	CG44007	Pde1c	0.422862	0.0447119	0.308	0.303	1
FBgn0038063	CG33976	Octbeta2R	0.430551	0.125756	0.389	0.336	1
FBgn0000036	CG5610	nAChRalpha1	0.432546	0.0763952	0.413	0.397	1
FBgn0053143	CG33143	CG33143	0.435488	-0.0055226	0.247	0.25	1
FBgn0030174	CG15312	CG15312	0.438199	0.00617207	0.249	0.251	1
FBgn0263289	CG43398	scrib	0.445207	-0.0092978	0.145	0.157	1
FBgn0039064	CG4467	CG4467	0.448602	0.318833	0.475	0.339	1
FBgn0029814	CG15765	CG15765	0.452559	0.12016	0.455	0.415	1
FBgn0035092	CG3441	Nplp1	0.455358	0.131519	0.256	0.23	1
FBgn0038237	CG8279	Pde6	0.455371	0.170084	0.485	0.445	1
FBgn0085413	CG34384	CG34384	0.457899	0.0818857	0.231	0.187	1
FBgn0031770	CG13995	CG13995	0.459973	-0.0100431	0.205	0.22	1
FBgn0033108	CG15236	CG15236	0.461351	0.0759437	0.298	0.271	1
FBgn0033484	CG2269	CG2269	0.465958	-0.323116	0.766	0.813	1
FBgn0031632	CG15628	CG15628	0.467074	-0.0271615	0.489	0.523	1
FBgn0040532	CG8369	CG8369	0.475271	0.0495958	0.143	0.131	1
FBgn0034731	CG10384	CG10384	0.476125	0.0130308	0.147	0.137	1
FBgn0261244	CG33174	inaE	0.481434	0.00842544	0.376	0.378	1
FBgn0264006	CG43749	dysc	0.482213	0.228813	0.762	0.726	1
FBgn0000108	CG7727	Appl	0.485077	0.545842	0.842	0.806	1
FBgn0015399	CG12283	kek1	0.485997	0.0686594	0.405	0.374	1
FBgn0000422	CG10697	Ddc	0.487923	0.150515	0.391	0.361	1
FBgn0001235	CG17117	hth	0.490264	0.582053	0.588	0.547	1
FBgn0035170	CG12191	dpr20	0.491379	-0.0113454	0.105	0.114	1
FBgn0261555	CG42673	CG42673	0.496271	0.00981785	0.101	0.092	1
FBgn0036927	CG7433	Gabat	0.498617	-0.0475405	0.425	0.453	1
FBgn0010113	CG15532	hdc	0.504386	0.609286	0.661	0.546	1
FBgn0015229	CG6575	glec	0.506211	0.0784928	0.27	0.219	1
FBgn0263220	CG43388	Hk	0.507877	0.275875	0.723	0.683	1
FBgn0019650	CG11186	toy	0.513094	0.0174764	0.222	0.205	1
FBgn0038156	CG14372	side-IV	0.518828	0.0205581	0.108	0.094	1
FBgn0263980	CG43729	Stacl	0.521898	-0.154651	0.567	0.567	1
FBgn0264001	CG43744	bru3	0.536171	0.881023	0.71	0.617	1
FBgn0036494	CG7250	Toll-6	0.540603	0.0607159	0.34	0.315	1
FBgn0037015	CG13253	cmpy	0.543559	0.0161328	0.288	0.278	1
FBgn0000303	CG12345	ChAT	0.549588	-0.0090848	0.11	0.117	1
FBgn0250908	CG42242	beat-VII	0.55141	0.0552281	0.426	0.422	1
FBgn0030723	CG14948	dpr18	0.55206	-0.00622449	0.152	0.164	1
FBgn0000575	CG1007	emc	0.555033	0.0471214	0.204	0.179	1
FBgn0003423	CG1417	slgA	0.558701	0.233866	0.754	0.715	1
FBgn0086758	CG31666	chinmo	0.579076	0.264573	0.699	0.661	1
FBgn0033405	CG13954	CG13954	0.581462	0.0115814	0.163	0.165	1
FBgn0266871	CR45332	lncRNA:CR45332	0.58165	0.0131009	0.157	0.15	1
FBgn0265487	CG33197	mbl	0.58294	0.356186	0.66	0.646	1
FBgn0083949	CG34113	side-III	0.590137	0.0591123	0.448	0.429	1
FBgn0011656	CG1429	Mef2	0.591139	0.0558128	0.218	0.189	1
FBgn0260793	CG42573	2mit	0.596907	0.0369815	0.21	0.193	1
FBgn0035173	CG13907	CG13907	0.597332	0.00960546	0.115	0.107	1
FBgn0262509	CG43079	nrm	0.598163	0.0320353	0.216	0.201	1
FBgn0086677	CG30040	jeb	0.602865	0.243677	0.475	0.394	1
FBgn0262593	CG43128	Shab	0.609579	0.151121	0.435	0.38	1
FBgn0039584	CG14064	beat-VI	0.611396	0.0411114	0.274	0.252	1
FBgn0264908	CG44099	pHCl-1	0.611407	0.105518	0.284	0.236	1
FBgn0010412	CG4464	RpS19a	0.612422	0.0200554	0.269	0.265	1
FBgn0043364	CG4427	cbt	0.613178	0.00925136	0.129	0.123	1
FBgn0001233	CG1242	Hsp83	0.615085	-0.125651	0.684	0.704	1
FBgn0011582	CG9652	Dop1R1	0.622164	0.00793624	0.255	0.25	1
FBgn0013467	CG18285	igl	0.624031	0.335497	0.52	0.417	1
FBgn0024321	CG8524	NK7.1	0.633002	0.017234	0.173	0.174	1
FBgn0261258	CG6014	rgn	0.638076	-0.0058027	0.182	0.192	1
FBgn0053696	CG33696	CNMaR	0.642133	0.00776759	0.101	0.091	1
FBgn0052506	CG32506	CG32506	0.642606	0.0140876	0.212	0.209	1
FBgn0032666	CG5758	CG5758	0.652552	0.04341	0.263	0.233	1
FBgn0041094	CG7590	scyl	0.653095	0.0463335	0.374	0.363	1
FBgn0085391	CG34362	trv	0.67317	0.419471	0.576	0.469	1
FBgn0028496	CG30116	CG30116	0.673437	-0.00994457	0.311	0.31	1
FBgn0027598	CG31012	cindr	0.680516	0.197221	0.535	0.462	1
FBgn0039617	CG14521	DIP-gamma	0.68291	0.00437015	0.225	0.227	1
FBgn0030574	CG9413	sbm	0.686026	0.0247233	0.202	0.181	1
FBgn0015400	CG4977	kek2	0.687916	0.0388451	0.351	0.337	1
FBgn0000636	CG5803	Fas3	0.692171	0.00589167	0.17	0.176	1
FBgn0260462	CG12163	CG12163	0.697841	-0.00262005	0.141	0.142	1
FBgn0034725	CG6044	CG6044	0.701489	-0.172828	0.464	0.528	1
FBgn0041707	CG1168	7B2	0.703703	-0.320626	0.798	0.836	1
FBgn0264503	CG43902	CG43902	0.715139	0.0924444	0.245	0.213	1
FBgn0263994	CG43737	CG43737	0.715292	0.308789	0.537	0.459	1
FBgn0004198	CG11387	ct	0.718466	0.201362	0.285	0.222	1
FBgn0028369	CG3653	kirre	0.740509	0.129931	0.298	0.242	1
FBgn0004369	CG11516	Ptp99A	0.742861	0.295704	0.644	0.562	1
FBgn0028645	CG7644	beat-Ib	0.756056	0.0865075	0.328	0.291	1
FBgn0038980	CG6919	Octbeta1R	0.758125	0.00610646	0.121	0.116	1
FBgn0051345	CG31345	CG31345	0.761353	-0.0295416	0.095	0.107	1
FBgn0039647	CG14509	jus	0.76588	-0.0140475	0.349	0.353	1
FBgn0013433	CG4846	beat-Ia	0.768983	0.0102729	0.172	0.163	1
FBgn0085409	CG34380	smal	0.76907	0.0335891	0.234	0.218	1
FBgn0000116	CG32031	Argk	0.779219	0.0446916	0.77	0.789	1
FBgn0051665	CG31665	wry	0.785791	0.134231	0.39	0.354	1
FBgn0028644	CG4838	beat-Ic	0.797303	0.203084	0.435	0.389	1
FBgn0265597	CG44424	rad	0.807742	0.341205	0.471	0.429	1
FBgn0041605	CG32490	cpx	0.830629	-0.287986	0.954	0.959	1
FBgn0039770	CG15537	CG15537	0.834178	0.0487085	0.097	0.106	1
FBgn0263995	CG43738	cpo	0.834226	0.217984	0.625	0.561	1
FBgn0264386	CG15899	Ca-alpha1T	0.837091	0.494691	0.5	0.397	1
FBgn0265182	CG44247	CG44247	0.84517	0.0241895	0.26	0.245	1
FBgn0033446	CG1648	CG1648	0.847579	0.00769329	0.207	0.204	1
FBgn0267253	CG32700	CG32700	0.852279	0.0459162	0.249	0.228	1
FBgn0030090	CG12664	fend	0.858456	-0.0366972	0.456	0.472	1
FBgn0038498	CG14334	beat-IIa	0.873739	0.068455	0.282	0.261	1
FBgn0085414	CG34385	dpr12	0.878959	0.0590509	0.413	0.385	1
FBgn0260660	CG42543	Mp	0.879379	0.0412471	0.325	0.315	1
FBgn0036043	CG8177	CG8177	0.882617	0.0328085	0.3	0.278	1
FBgn0000037	CG4356	mAChR-A	0.88284	0.0438596	0.422	0.399	1
FBgn0023534	CG17778	CG17778	0.884555	0.0179389	0.195	0.197	1
FBgn0285963	CG46339	CG46339	0.887891	0.0136679	0.131	0.123	1
FBgn0040726	CG13439	dpr1	0.897473	0.0906737	0.341	0.308	1
FBgn0015919	CG10605	caup	0.89812	0.00638776	0.117	0.12	1
FBgn0000273	CG4379	Pka-C1	0.899883	0.17994	0.573	0.509	1
FBgn0264606	CG43955	Fife	0.907354	0.0338884	0.389	0.395	1
FBgn0259244	CG42342	CG42342	0.919827	-0.0761714	0.471	0.485	1
FBgn0261804	CG42750	CG42750	0.919937	0.0271133	0.37	0.35	1
FBgn0052183	CG32183	Ccn	0.925855	0.017128	0.16	0.155	1
FBgn0052062	CG32062	Rbfox1	0.950079	0.475046	0.856	0.78	1
FBgn0004509	CG10772	Fur1	0.964919	0.0116162	0.166	0.171	1
FBgn0085400	CG34371	side-V	0.970736	0.00893082	0.178	0.176	1
FBgn0020907	CG14904	Scp2	0.971016	-0.0119535	0.144	0.148	1
FBgn0083963	CG34127	Nlg3	0.98086	0.056811	0.531	0.505	1
FBgn0037521	CG2993	CG2993	0.981742	0.0295581	0.302	0.289	1
FBgn0004244	CG10537	Rdl	0.993319	0.209799	0.944	0.959	1
FBgn0261871	CG33507	dpr2	0.995444	0.00151373	0.132	0.131	1
FBgn0262869	CG43224	Gfrl	0.995456	0.110276	0.409	0.378	1

## Sheet: Female_C2
FlyBaseID	GeneID	Gene symbol	p_val	avg_diff	pct.1	pct.2	p_val_adj
FBgn0019660	CR32665	lncRNA:roX2	9.91435e-250	-1.98033	0.005	0.707	1.48715e-246
FBgn0085753	CR40596	28SrRNA-Psi:CR40596	1.16888e-57	0.12188	0.122	0.021	1.75333e-54
FBgn0033987	CG12424	ckn	2.80368e-25	0.06975	0.172	0.109	4.20552e-22
FBgn0038641	CG7708	ChT	2.18117e-24	0.222041	0.359	0.217	3.27175e-21
FBgn0052683	CG32683	CG32683	6.18263e-20	0.245771	0.305	0.163	9.27394e-17
FBgn0038246	CG14853	CG14853	7.57534e-20	0.0803769	0.191	0.125	1.1363e-16
FBgn0052057	CG32057	dpr10	1.01242e-17	0.113113	0.204	0.124	1.51863e-14
FBgn0004573	CG12073	5-HT7	1.10297e-16	0.0743687	0.157	0.095	1.65446e-13
FBgn0013995	CG5685	Calx	1.18898e-16	0.284719	0.343	0.198	1.78347e-13
FBgn0029768	CG16752	SPR	1.52674e-16	0.18562	0.222	0.119	2.29011e-13
FBgn0052982	CG32982	CG32982	1.8767e-16	0.138718	0.199	0.109	2.81505e-13
FBgn0058469	CR40469	lncRNA:CR40469	5.61548e-16	0.0721472	0.131	0.076	8.42322e-13
FBgn0023095	CG11282	caps	8.92009e-15	0.0861054	0.202	0.131	1.33801e-11
FBgn0266377	CG45019	Pde8	4.94189e-14	0.0814007	0.21	0.142	7.41284e-11
FBgn0283651	CG46301	CG46301	8.71838e-14	0.195598	0.267	0.162	1.30776e-10
FBgn0259170	CG42275	alpha-Man-Ia	1.04193e-13	0.112077	0.216	0.139	1.5629e-10
FBgn0261649	CG31247	tinc	1.92337e-13	0.0579899	0.141	0.088	2.88505e-10
FBgn0265052	CG44167	St3	2.57231e-13	0.102913	0.259	0.191	3.85847e-10
FBgn0027356	CG8604	Amph	4.59589e-13	0.0422997	0.162	0.127	6.89384e-10
FBgn0002940	CG4550	ninaE	8.98586e-13	-0.118364	0.058	0.122	1.34788e-09
FBgn0052521	CG32521	CG32521	7.82447e-12	0.0789551	0.141	0.081	1.17367e-08
FBgn0085385	CG34356	bma	1.01493e-11	0.271114	0.399	0.272	1.52239e-08
FBgn0261260	CG42611	mgl	1.44773e-11	0.112302	0.216	0.138	2.17159e-08
FBgn0267322	CR45758	lncRNA:CR45758	1.49955e-11	0.090292	0.196	0.132	2.24932e-08
FBgn0003301	CG9533	rut	2.32554e-11	0.123136	0.239	0.149	3.48831e-08
FBgn0001234	CR31400	lncRNA:Hsromega	2.40944e-11	3.3978	0.993	0.995	3.61416e-08
FBgn0262473	CG5490	Tl	4.00786e-11	0.0650793	0.141	0.082	6.01179e-08
FBgn0050361	CG30361	mtt	5.14204e-11	0.0872529	0.136	0.075	7.71305e-08
FBgn0040877	CG12994	CG12994	5.905e-11	0.0633652	0.106	0.06	8.8575e-08
FBgn0041097	CG5423	robo3	8.0309e-11	0.0715178	0.19	0.128	1.20464e-07
FBgn0019662	CG8593	qm	8.98804e-11	0.0467677	0.146	0.106	1.34821e-07
FBgn0259234	CG42332	Camta	9.63236e-11	0.0531848	0.195	0.148	1.44485e-07
FBgn0024944	CG3856	Oamb	1.20258e-10	0.0491757	0.114	0.074	1.80387e-07
FBgn0013718	CG33991	nuf	1.28612e-10	0.0176571	0.115	0.1	1.92917e-07
FBgn0050115	CG30115	GEFmeso	1.31359e-10	0.0411808	0.102	0.066	1.97039e-07
FBgn0004619	CG8442	GluRIA	2.53089e-10	0.168501	0.305	0.211	3.79633e-07
FBgn0087012	CG1056	5-HT2A	2.62931e-10	0.0775637	0.124	0.069	3.94396e-07
FBgn0034398	CG15098	CG15098	2.68369e-10	0.0411055	0.103	0.065	4.02553e-07
FBgn0264753	CG44011	Rgk1	2.90149e-10	0.084533	0.142	0.085	4.35224e-07
FBgn0264308	CG43778	CG43778	4.71649e-10	0.182477	0.292	0.169	7.07473e-07
FBgn0259212	CG42312	cno	5.85365e-10	0.0670964	0.134	0.083	8.78047e-07
FBgn0042696	CG2380	NfI	1.12453e-09	0.106511	0.182	0.101	1.68679e-06
FBgn0260971	CG42594	CG42594	1.18694e-09	0.167402	0.297	0.198	1.78041e-06
FBgn0028888	CG4168	CG4168	1.67934e-09	0.0743794	0.155	0.092	2.51901e-06
FBgn0004395	CG4620	unk	1.80505e-09	0.0915112	0.198	0.133	2.70758e-06
FBgn0267579	CR45919	lncRNA:CR45919	2.3137e-09	0.0332255	0.152	0.122	3.47056e-06
FBgn0033356	CG8229	CG8229	3.48732e-09	-0.0347064	0.079	0.108	5.23098e-06
FBgn0002543	CG5481	robo2	6.28756e-09	0.128748	0.181	0.112	9.43135e-06
FBgn0259677	CG42346	CG42346	6.86277e-09	0.0949752	0.192	0.129	1.02942e-05
FBgn0265416	CG44328	Neto	8.0274e-09	0.0603656	0.105	0.056	1.20411e-05
FBgn0267431	CG45784	Myo81F	1.08517e-08	0.0866361	0.153	0.098	1.62776e-05
FBgn0260003	CG34157	Dys	1.10849e-08	0.0793728	0.189	0.128	1.66273e-05
FBgn0004882	CG10868	orb	1.19484e-08	0.0489067	0.102	0.061	1.79227e-05
FBgn0040765	CG33473	luna	1.68596e-08	0.236546	0.386	0.266	2.52893e-05
FBgn0264794	CR44024	lncRNA:CR44024	2.03745e-08	0.192453	0.311	0.226	3.05617e-05
FBgn0085426	CG34397	Rgk3	2.06201e-08	0.053027	0.119	0.08	3.09301e-05
FBgn0033368	CG13743	CG13743	2.37633e-08	0.112333	0.248	0.173	3.56449e-05
FBgn0267910	CR34335	lncRNA:CR34335	2.47924e-08	4.13785	0.982	0.885	3.71886e-05
FBgn0036789	CG13702	AstC-R2	3.15468e-08	0.12317	0.172	0.106	4.73202e-05
FBgn0001226	CG4466	Hsp27	3.82358e-08	-0.413429	0.16	0.254	5.73537e-05
FBgn0020621	CG2049	Pkn	4.3932e-08	0.044817	0.108	0.07	6.58981e-05
FBgn0000547	CG12676	ed	7.11916e-08	0.152782	0.271	0.185	0.000106787
FBgn0260442	CG6831	rhea	1.57595e-07	0.058734	0.149	0.103	0.000236392
FBgn0001225	CG4183	Hsp26	1.63257e-07	-0.334288	0.207	0.3	0.000244886
FBgn0004595	CG17228	pros	1.72958e-07	1.63907	0.827	0.838	0.000259438
FBgn0264090	CG43759	CG43759	3.09727e-07	0.145316	0.247	0.178	0.00046459
FBgn0051324	CG31324	CG31324	3.41756e-07	0.0939281	0.196	0.128	0.000512633
FBgn0261285	CG5629	Ppcs	4.22452e-07	0.095393	0.228	0.162	0.000633678
FBgn0261090	CG42333	Sytbeta	6.33617e-07	0.0855191	0.251	0.193	0.000950425
FBgn0026411	CG11354	Lim1	8.39744e-07	0.319767	0.305	0.221	0.00125962
FBgn0085399	CG34370	CG34370	9.86811e-07	0.0621335	0.136	0.086	0.00148022
FBgn0033159	CG17800	Dscam1	1.38673e-06	0.0723103	0.269	0.224	0.00208009
FBgn0010300	CG10719	brat	1.55394e-06	0.407075	0.502	0.353	0.00233091
FBgn0031299	CG4629	CG4629	2.09364e-06	0.0440048	0.148	0.12	0.00314047
FBgn0025382	CG14791	Rab27	3.11472e-06	-0.0304069	0.166	0.199	0.00467208
FBgn0259111	CG42253	Ndae1	3.73291e-06	0.080506	0.184	0.128	0.00559936
FBgn0033403	CG13739	CG13739	4.26857e-06	0.250506	0.309	0.179	0.00640286
FBgn0031738	CG9171	CG9171	4.40094e-06	0.0428196	0.129	0.088	0.00660141
FBgn0037963	CG6977	Cad87A	6.76406e-06	0.0567707	0.132	0.087	0.0101461
FBgn0053639	CG33639	CG33639	8.3152e-06	0.0296341	0.104	0.082	0.0124728
FBgn0051814	CG31814	DIP-kappa	9.68005e-06	0.0596394	0.135	0.095	0.0145201
FBgn0037956	CG6959	CG6959	1.0609e-05	0.027314	0.117	0.09	0.0159135
FBgn0031736	CG11030	CG11030	1.23437e-05	0.0876743	0.262	0.215	0.0185156
FBgn0051163	CG31163	SKIP	1.23499e-05	0.138361	0.338	0.259	0.0185248
FBgn0004449	CG5723	Ten-m	1.23881e-05	0.22115	0.378	0.277	0.0185822
FBgn0050463	CG30463	Pgant9	1.24192e-05	0.0972039	0.262	0.194	0.0186287
FBgn0040805	CG12355	CG12355	1.38279e-05	-0.0358719	0.077	0.11	0.0207419
FBgn0085395	CG34366	Shawl	1.45357e-05	0.0675159	0.16	0.112	0.0218035
FBgn0051760	CG31760	CG31760	1.47652e-05	0.114176	0.237	0.174	0.0221478
FBgn0260941	CG42318	app	1.49463e-05	0.0780138	0.181	0.117	0.0224195
FBgn0051191	CG31191	CG31191	1.71599e-05	0.0511587	0.15	0.109	0.0257399
FBgn0051690	CG31690	CG31690	1.76827e-05	0.0992658	0.248	0.184	0.0265241
FBgn0004607	CG1449	zfh2	1.80427e-05	0.130915	0.161	0.101	0.027064
FBgn0034897	CG11299	Sesn	2.07578e-05	0.0517109	0.103	0.073	0.0311367
FBgn0011224	CG31000	heph	2.08208e-05	1.96291	0.772	0.713	0.0312312
FBgn0261549	CG42667	rdgA	2.12094e-05	0.439947	0.47	0.386	0.0318141
FBgn0265194	CG44240	Trpm	2.27394e-05	0.0474257	0.142	0.103	0.0341091
FBgn0035173	CG13907	CG13907	2.32983e-05	0.0239271	0.105	0.08	0.0349474
FBgn0263706	CG43658	CG43658	2.76527e-05	0.132672	0.218	0.152	0.0414791
FBgn0085390	CG34361	Dgk	3.0856e-05	0.0517647	0.124	0.078	0.046284
FBgn0039209	CG13624	REPTOR	3.27621e-05	0.0954575	0.25	0.178	0.0491431
FBgn0263873	CG43720	sick	3.36538e-05	0.0213578	0.122	0.104	0.0504807
FBgn0052066	CG32066	CG32066	3.39187e-05	0.0382225	0.135	0.101	0.050878
FBgn0085382	CG34353	CG34353	3.90771e-05	0.114897	0.275	0.207	0.0586156
FBgn0001085	CG17697	fz	4.16357e-05	0.0787435	0.228	0.172	0.0624536
FBgn0052206	CG32206	CG32206	4.17911e-05	0.126476	0.288	0.204	0.0626866
FBgn0051092	CG31092	LpR2	4.3442e-05	0.0545689	0.14	0.102	0.065163
FBgn0250910	CG42244	Octbeta3R	4.50536e-05	0.0288739	0.185	0.162	0.0675804
FBgn0024189	CG33141	sns	6.39653e-05	0.02605	0.147	0.123	0.095948
FBgn0010434	CG11949	cora	6.68807e-05	0.0407631	0.227	0.193	0.100321
FBgn0086677	CG30040	jeb	7.31375e-05	1.30604	0.769	0.71	0.109706
FBgn0065099	CR33925	snRNA:7SK	8.39815e-05	3.20194	0.698	0.509	0.125972
FBgn0250867	CG42238	CG42238	9.08802e-05	0.0695527	0.21	0.15	0.13632
FBgn0085397	CG34368	Fili	9.09058e-05	0.0156938	0.103	0.087	0.136359
FBgn0053087	CG33087	LRP1	9.28265e-05	0.0438775	0.118	0.084	0.13924
FBgn0005775	CG7503	Con	9.35484e-05	0.682075	0.619	0.471	0.140323
FBgn0010412	CG4464	RpS19a	9.67458e-05	0.0168037	0.283	0.255	0.145119
FBgn0066101	CG31094	LpR1	0.000113429	0.0759052	0.225	0.178	0.170144
FBgn0031294	CG31795	IA-2	0.000137958	5.51301	0.993	0.991	0.206937
FBgn0263773	CG43690	fok	0.000142111	0.0247304	0.195	0.17	0.213167
FBgn0264000	CG43743	GluRIB	0.000148103	0.322119	0.428	0.302	0.222154
FBgn0052204	CG32204	CG32204	0.000158189	0.0601468	0.142	0.101	0.237284
FBgn0264001	CG43744	bru3	0.000178772	1.607	0.872	0.754	0.268158
FBgn0262614	CG43140	pyd	0.000212218	0.109312	0.219	0.163	0.318328
FBgn0083228	CG5907	Frq2	0.000225669	0.234914	0.419	0.328	0.338503
FBgn0259821	CG42402	CG42402	0.00023482	0.351852	0.425	0.316	0.35223
FBgn0004168	CG16720	5-HT1A	0.000252647	0.129022	0.264	0.197	0.37897
FBgn0020269	CG10145	mspo	0.00026823	0.0857773	0.251	0.192	0.402345
FBgn0011818	CG9884	oaf	0.000288881	0.0551068	0.156	0.125	0.433322
FBgn0264386	CG15899	Ca-alpha1T	0.000295751	0.999934	0.682	0.526	0.443626
FBgn0037913	CG6783	fabp	0.000305504	-0.0857396	0.166	0.211	0.458256
FBgn0001229	CG4190	Hsp67Bc	0.000410797	-0.177626	0.305	0.361	0.616195
FBgn0011828	CG12002	Pxn	0.000438634	-0.0625584	0.102	0.148	0.657952
FBgn0285926	CG1691	Imp	0.000463055	0.265658	0.294	0.224	0.694582
FBgn0030913	CG6123	CG6123	0.000465013	0.216051	0.388	0.31	0.69752
FBgn0261262	CG42613	CG42613	0.000502944	0.380523	0.513	0.322	0.754416
FBgn0021764	CG5227	sdk	0.00064306	0.0464342	0.117	0.08	0.96459
FBgn0283499	CG18402	InR	0.000780045	0.0775655	0.257	0.218	1
FBgn0085420	CG34391	DIP-delta	0.0008539	0.0990883	0.254	0.208	1
FBgn0086604	CG12484	side-VIII	0.000968204	0.0778022	0.251	0.212	1
FBgn0260429	CG42524	CG42524	0.000991068	0.0202784	0.125	0.108	1
FBgn0261046	CG31190	Dscam3	0.00104462	0.0449138	0.233	0.209	1
FBgn0262018	CG42829	CadN2	0.00108941	0.0661336	0.189	0.133	1
FBgn0263257	CG43395	Cngl	0.0011275	1.19473	0.802	0.709	1
FBgn0264273	CG33960	Sema2b	0.00133436	0.13013	0.282	0.224	1
FBgn0032833	CG10664	COX4	0.00136037	-0.81521	0.773	0.873	1
FBgn0261556	CG42674	CG42674	0.00139577	-0.039101	0.226	0.259	1
FBgn0010113	CG15532	hdc	0.00145391	0.788453	0.683	0.591	1
FBgn0267033	CG45477	mamo	0.00179305	0.715931	0.486	0.388	1
FBgn0011676	CG6713	Nos	0.00180776	0.124981	0.141	0.102	1
FBgn0013467	CG18285	igl	0.00194336	0.643729	0.63	0.531	1
FBgn0036454	CG17839	CG17839	0.00209999	0.0355778	0.141	0.11	1
FBgn0001297	CG33956	kay	0.00219377	0.0186935	0.106	0.092	1
FBgn0015774	CG10521	NetB	0.00228017	0.21841	0.312	0.236	1
FBgn0052698	CG32698	CARPB	0.00230618	0.0774526	0.134	0.1	1
FBgn0002643	CG8118	mam	0.00240413	0.0990596	0.245	0.195	1
FBgn0038494	CG4135	beat-IIb	0.00297727	0.0247878	0.138	0.114	1
FBgn0038237	CG8279	Pde6	0.00300635	0.320222	0.569	0.526	1
FBgn0016797	CG9739	fz2	0.00310892	0.103415	0.286	0.227	1
FBgn0031530	CG3254	Pgant2	0.00314422	0.0650757	0.175	0.136	1
FBgn0032797	CG10186	Hasp	0.0031625	-0.755452	0.76	0.846	1
FBgn0286778	CG46385	CG46385	0.00318505	0.414351	0.514	0.386	1
FBgn0040726	CG13439	dpr1	0.00357981	0.176609	0.334	0.272	1
FBgn0015777	CG9261	nrv2	0.00378185	0.0283576	0.156	0.144	1
FBgn0037941	CG12594	CG12594	0.00383745	0.0523313	0.176	0.144	1
FBgn0038156	CG14372	side-IV	0.00383816	0.0329906	0.11	0.081	1
FBgn0013686	CR34094	mt:lrRNA	0.00387246	9.92857	0.87	0.515	1
FBgn0025525	CG9102	bab2	0.00421401	0.0574825	0.125	0.092	1
FBgn0265597	CG44424	rad	0.00478058	0.742455	0.727	0.647	1
FBgn0015609	CG7100	CadN	0.00492157	0.226181	0.572	0.473	1
FBgn0267001	CG42338	Ten-a	0.00509867	1.69984	0.898	0.785	1
FBgn0004652	CG14307	fru	0.00565468	0.316771	0.304	0.191	1
FBgn0035032	CG4692	ATPsynF	0.00616111	-0.585136	0.768	0.839	1
FBgn0051721	CG31721	Trim9	0.00660345	0.0404672	0.119	0.09	1
FBgn0262737	CG7437	mub	0.00661183	0.680472	0.72	0.58	1
FBgn0019643	CG3318	AANAT1	0.00704919	-0.0297901	0.124	0.157	1
FBgn0267253	CG32700	CG32700	0.00713812	0.177939	0.373	0.318	1
FBgn0005771	CG4491	noc	0.00722036	-0.0443669	0.127	0.166	1
FBgn0263219	CG42330	Dscam4	0.007345	0.0952585	0.267	0.211	1
FBgn0026160	CG7958	tna	0.00747108	0.270523	0.44	0.288	1
FBgn0053516	CG33516	dpr3	0.00753975	0.0397626	0.159	0.134	1
FBgn0036927	CG7433	Gabat	0.00768989	-0.0756883	0.244	0.296	1
FBgn0039346	CG5079	CG5079	0.00770372	-0.0353178	0.181	0.215	1
FBgn0035041	CG13594	CG13594	0.00779672	0.0188208	0.137	0.119	1
FBgn0011656	CG1429	Mef2	0.00797878	0.112847	0.295	0.217	1
FBgn0010452	CG11280	trn	0.00801174	0.0518866	0.199	0.165	1
FBgn0259245	CG42343	DIP-beta	0.00874304	0.101715	0.156	0.123	1
FBgn0000037	CG4356	mAChR-A	0.00907216	0.0733915	0.486	0.433	1
FBgn0028369	CG3653	kirre	0.00913363	0.263145	0.395	0.276	1
FBgn0038929	CG13408	CG13408	0.00915264	-0.0808395	0.094	0.133	1
FBgn0085384	CG34355	CG34355	0.00944769	0.0697034	0.192	0.145	1
FBgn0051619	CG31619	nolo	0.00988627	0.100881	0.269	0.207	1
FBgn0034753	CG2852	CG2852	0.0105538	-0.30086	0.543	0.63	1
FBgn0000042	CG4027	Act5C	0.0108644	-0.0669243	0.804	0.831	1
FBgn0083975	CG34139	Nlg4	0.0112441	0.0484567	0.212	0.179	1
FBgn0083950	CG34114	side-VI	0.0115762	0.292766	0.46	0.341	1
FBgn0085380	CG34351	CG34351	0.0119312	0.035472	0.108	0.081	1
FBgn0003326	CG17579	sca	0.0124742	0.0458605	0.138	0.111	1
FBgn0285963	CG46339	CG46339	0.0139131	0.0205904	0.144	0.128	1
FBgn0262782	CG5362	Mdh1	0.0145204	-0.044141	0.138	0.176	1
FBgn0002868	CG9470	MtnA	0.0147737	0.160564	0.236	0.154	1
FBgn0264087	CG43756	Slob	0.0155735	0.0629259	0.237	0.176	1
FBgn0039349	CG4685	Ssadh	0.0156178	-0.0287538	0.14	0.164	1
FBgn0263994	CG43737	CG43737	0.0157486	0.250346	0.557	0.479	1
FBgn0001224	CG4463	Hsp23	0.0157751	-0.286087	0.234	0.291	1
FBgn0003165	CG9755	pum	0.0158762	1.03511	0.859	0.691	1
FBgn0030574	CG9413	sbm	0.0167658	0.0680431	0.19	0.142	1
FBgn0031835	CG11319	CG11319	0.0172019	0.196177	0.359	0.296	1
FBgn0086359	CG3953	Invadolysin	0.0173743	0.0305235	0.203	0.188	1
FBgn0019985	CG11144	mGluR	0.0178412	0.131055	0.315	0.259	1
FBgn0261113	CG17836	Xrp1	0.0178934	0.0335518	0.264	0.228	1
FBgn0014859	CG1864	Hr38	0.0179803	-0.42316	0.423	0.474	1
FBgn0024963	CG7535	GluClalpha	0.0180884	0.132036	0.654	0.586	1
FBgn0086680	CG10037	vvl	0.0181833	0.142803	0.148	0.114	1
FBgn0264490	CG18389	Eip93F	0.0193345	0.271213	0.279	0.205	1
FBgn0029761	CG10706	SK	0.0209472	0.471731	0.665	0.522	1
FBgn0039054	CG13830	Cow	0.0214961	0.295307	0.501	0.407	1
FBgn0027339	CG11352	jim	0.0225344	2.15379	0.94	0.882	1
FBgn0033405	CG13954	CG13954	0.0235055	0.0301326	0.245	0.218	1
FBgn0041605	CG32490	cpx	0.0236548	-0.0979928	0.893	0.909	1
FBgn0031306	CG4577	CG4577	0.0249026	0.373579	0.414	0.329	1
FBgn0000179	CG3578	bi	0.025573	0.199604	0.263	0.212	1
FBgn0000028	CG9151	acj6	0.0256171	0.189504	0.183	0.163	1
FBgn0040823	CG14162	dpr6	0.0257927	-0.0140622	0.29	0.316	1
FBgn0052183	CG32183	Ccn	0.0260697	0.0484352	0.193	0.164	1
FBgn0266100	CG44837	CG44837	0.026441	0.0430007	0.163	0.13	1
FBgn0029939	CG9650	CG9650	0.0266781	0.105202	0.118	0.109	1
FBgn0259243	CG42341	Pka-R1	0.0268707	0.141037	0.427	0.385	1
FBgn0035171	CG12502	CG12502	0.0283753	0.00863313	0.173	0.164	1
FBgn0035816	CG13685	CG13685	0.0291212	0.0326929	0.207	0.187	1
FBgn0005636	CG3385	nvy	0.0299853	-0.0384663	0.149	0.177	1
FBgn0013973	CG1470	Gycbeta100B	0.0325356	0.0514886	0.221	0.18	1
FBgn0040397	CG3655	CG3655	0.0326129	0.0800828	0.185	0.155	1
FBgn0031897	CG13784	CG13784	0.0330195	-0.00528208	0.262	0.254	1
FBgn0264895	CG44086	RapGAP1	0.0340895	0.227158	0.448	0.385	1
FBgn0263995	CG43738	cpo	0.034329	0.454026	0.804	0.76	1
FBgn0035499	CG14996	Chd64	0.0347139	0.0324903	0.176	0.149	1
FBgn0039064	CG4467	CG4467	0.0359515	0.464852	0.574	0.386	1
FBgn0002945	CG11614	nkd	0.0364018	0.0543089	0.293	0.246	1
FBgn0035756	CG32381	unc-13-4A	0.0373902	0.18982	0.414	0.354	1
FBgn0011661	CG10701	Moe	0.0378401	0.0342313	0.282	0.246	1
FBgn0010263	CG3151	Rbp9	0.0382758	0.294339	0.569	0.461	1
FBgn0031424	CG9887	VGlut	0.0386567	-0.0097125	0.115	0.109	1
FBgn0004910	CG15855	Eip63F-1	0.040017	0.0512466	0.115	0.084	1
FBgn0261928	CG42795	CG42795	0.0403405	0.0866953	0.236	0.179	1
FBgn0260658	CG42541	CG42541	0.0407473	-0.309679	0.602	0.63	1
FBgn0032901	CG9339	sky	0.04099	0.0345756	0.471	0.493	1
FBgn0028644	CG4838	beat-Ic	0.0413764	0.268054	0.387	0.331	1
FBgn0085400	CG34371	side-V	0.0415245	0.0600446	0.222	0.18	1
FBgn0014163	CG4609	fax	0.0416684	0.723799	0.766	0.602	1
FBgn0004198	CG11387	ct	0.04273	0.203733	0.291	0.264	1
FBgn0037153	CG12673	olf413	0.0436689	0.153196	0.341	0.273	1
FBgn0000064	CG6058	Ald1	0.0448601	-0.615645	0.62	0.742	1
FBgn0052406	CG32406	PVRAP	0.0472442	0.0295355	0.132	0.113	1
FBgn0003380	CG12348	Sh	0.0472871	2.00764	0.964	0.918	1
FBgn0011666	CG5099	msi	0.0479619	0.457561	0.517	0.327	1
FBgn0262636	CG2052	dati	0.0484324	0.19901	0.385	0.338	1
FBgn0027654	CG2239	jdp	0.0487898	-0.247532	0.862	0.864	1
FBgn0029663	CG10804	CG10804	0.0509721	0.0497638	0.19	0.159	1
FBgn0266756	CG44012	btsz	0.0524723	0.0336683	0.131	0.111	1
FBgn0260660	CG42543	Mp	0.0539636	0.0750356	0.37	0.325	1
FBgn0028704	CG18660	Nckx30C	0.0554245	0.273811	0.652	0.596	1
FBgn0015519	CG2302	nAChRalpha3	0.0586748	0.129906	0.289	0.211	1
FBgn0034978	CG3257	CG3257	0.0594837	0.00623235	0.248	0.244	1
FBgn0038653	CG18208	Octalpha2R	0.0629262	0.13943	0.358	0.303	1
FBgn0029824	CG3726	CG3726	0.0630457	0.0774848	0.173	0.122	1
FBgn0051221	CG31221	CG31221	0.0643145	3.8843	0.979	0.958	1
FBgn0264815	CG44007	Pde1c	0.065021	0.149501	0.376	0.313	1
FBgn0024321	CG8524	NK7.1	0.066141	0.0296808	0.222	0.198	1
FBgn0038087	CG10134	beat-Va	0.0664047	0.045934	0.176	0.147	1
FBgn0036935	CG14186	CG14186	0.0703444	0.0779869	0.211	0.186	1
FBgn0034731	CG10384	CG10384	0.0705068	0.0510637	0.247	0.217	1
FBgn0025682	CG9148	scf	0.0711608	0.00199916	0.138	0.129	1
FBgn0004580	CG6702	Cbp53E	0.0721933	0.662008	0.625	0.522	1
FBgn0004858	CG4220	elB	0.0736536	0.0380091	0.25	0.226	1
FBgn0039617	CG14521	DIP-gamma	0.0743319	0.0106144	0.214	0.202	1
FBgn0263772	CG43689	CG43689	0.0781704	0.0720109	0.103	0.103	1
FBgn0003274	CG4918	RpLP2	0.0791763	-0.113206	0.643	0.646	1
FBgn0270928	CG32848	VAChT	0.0800315	0.212536	0.679	0.642	1
FBgn0261788	CG42734	Ank2	0.0829685	0.591881	0.795	0.695	1
FBgn0001078	CG4059	ftz-f1	0.083744	0.114081	0.244	0.166	1
FBgn0033544	CG7220	CG7220	0.0851368	-0.0466853	0.27	0.3	1
FBgn0264339	CG43795	CG43795	0.0866101	-0.0709943	0.184	0.223	1
FBgn0031697	CG14024	CG14024	0.0888547	0.015294	0.265	0.247	1
FBgn0038980	CG6919	Octbeta1R	0.0909754	0.0219549	0.192	0.167	1
FBgn0029897	CG3203	RpL17	0.0918015	-0.246519	0.624	0.688	1
FBgn0004514	CG7485	Oct-TyrR	0.0986239	0.0388016	0.163	0.131	1
FBgn0261552	CG42670	ps	0.100465	0.012739	0.902	0.939	1
FBgn0266851	CR45312	lncRNA:CR45312	0.10097	-0.0715465	0.237	0.266	1
FBgn0022382	CG15862	Pka-R2	0.104437	0.143342	0.397	0.312	1
FBgn0284243	CG9277	betaTub56D	0.104707	-0.20128	0.373	0.446	1
FBgn0001233	CG1242	Hsp83	0.105612	-0.199231	0.658	0.7	1
FBgn0043364	CG4427	cbt	0.108881	-0.0100352	0.172	0.172	1
FBgn0265595	CG44422	CG44422	0.109828	0.174673	0.296	0.22	1
FBgn0033108	CG15236	CG15236	0.110048	0.115804	0.323	0.296	1
FBgn0264574	CG43946	Glut1	0.115056	0.109681	0.334	0.276	1
FBgn0013981	CG3379	His4r	0.115098	-0.420872	0.972	0.985	1
FBgn0000097	CG3166	aop	0.115455	0.0201296	0.227	0.226	1
FBgn0051646	CG31646	DIP-theta	0.118297	0.0898115	0.185	0.158	1
FBgn0037521	CG2993	CG2993	0.118418	0.0751378	0.388	0.341	1
FBgn0262160	CG9932	CG9932	0.120283	0.124425	0.27	0.207	1
FBgn0037015	CG13253	cmpy	0.120745	0.104652	0.34	0.293	1
FBgn0030272	CG15201	CG15201	0.123246	0.0279057	0.131	0.116	1
FBgn0086778	CG32538	nAChRalpha7	0.125152	0.178637	0.481	0.41	1
FBgn0037525	CG17816	CG17816	0.125971	0.21148	0.494	0.413	1
FBgn0030897	CG5744	Frq1	0.127179	0.40771	0.546	0.442	1
FBgn0085413	CG34384	CG34384	0.130072	0.118868	0.271	0.215	1
FBgn0262738	CG3620	norpA	0.130137	0.0765363	0.505	0.462	1
FBgn0026428	CG6170	HDAC6	0.13162	-0.00522829	0.103	0.104	1
FBgn0025360	CG18455	Optix	0.133163	-0.0785642	0.158	0.169	1
FBgn0004885	CG6863	tok	0.133645	0.024465	0.118	0.098	1
FBgn0264006	CG43749	dysc	0.134661	0.398752	0.807	0.747	1
FBgn0041094	CG7590	scyl	0.138343	0.0303728	0.409	0.402	1
FBgn0261597	CG10305	RpS26	0.140337	-0.133935	0.797	0.805	1
FBgn0264503	CG43902	CG43902	0.142277	0.169182	0.279	0.249	1
FBgn0001235	CG17117	hth	0.143837	0.155762	0.453	0.412	1
FBgn0285948	CG15442	RpL27A	0.145349	0.119616	0.749	0.735	1
FBgn0263220	CG43388	Hk	0.145505	0.233329	0.688	0.646	1
FBgn0265182	CG44247	CG44247	0.146439	0.0795987	0.316	0.271	1
FBgn0031016	CG12199	kek5	0.147837	0.0115718	0.105	0.1	1
FBgn0036144	CG6207	GlcAT-P	0.148021	0.062614	0.205	0.164	1
FBgn0000114	CG31762	bru1	0.148427	0.0158875	0.106	0.102	1
FBgn0033791	CG3915	Drl-2	0.149459	0.0471389	0.204	0.183	1
FBgn0038063	CG33976	Octbeta2R	0.150572	0.202033	0.415	0.344	1
FBgn0025885	CG11143	Inos	0.152604	0.00786933	0.126	0.125	1
FBgn0052017	CG32017	CG32017	0.152836	0.16389	0.357	0.254	1
FBgn0034725	CG6044	CG6044	0.155555	-0.109617	0.381	0.439	1
FBgn0028875	CG32975	nAChRalpha5	0.155596	0.602682	0.804	0.78	1
FBgn0261574	CG7749	kug	0.157753	0.0472931	0.179	0.153	1
FBgn0033358	CG8216	spab	0.15948	0.0179225	0.45	0.442	1
FBgn0083991	CG34155	CG34155	0.161294	0.0472178	0.124	0.112	1
FBgn0028496	CG30116	CG30116	0.163203	-0.0358127	0.382	0.387	1
FBgn0265598	CG44425	Bx	0.163974	0.0522148	0.197	0.198	1
FBgn0001091	CG12055	Gapdh1	0.164863	-0.158034	0.294	0.385	1
FBgn0013954	CG11001	Fkbp12	0.16581	-0.286486	0.625	0.687	1
FBgn0052432	CG32432	CG32432	0.172393	0.0501959	0.184	0.148	1
FBgn0262508	CG43078	CG43078	0.173311	-0.0081311	0.1	0.106	1
FBgn0261988	CG17998	Gprk2	0.173584	0.165665	0.419	0.347	1
FBgn0023179	CG6438	amon	0.174428	0.157222	0.44	0.372	1
FBgn0266137	CG18741	Dop1R2	0.175147	0.00410231	0.132	0.126	1
FBgn0085421	CG34392	Epac	0.175774	0.083	0.277	0.234	1
FBgn0259213	CG42313	side-II	0.179243	-0.0289994	0.401	0.424	1
FBgn0033268	CG2297	Obp44a	0.179417	-0.0353663	0.155	0.179	1
FBgn0004369	CG11516	Ptp99A	0.182656	0.380338	0.723	0.662	1
FBgn0030505	CG11172	NFAT	0.184543	0.116765	0.408	0.351	1
FBgn0035495	CG14989	CG14989	0.185181	0.0154339	0.3	0.277	1
FBgn0052600	CG32600	dpr8	0.185936	0.200753	0.485	0.411	1
FBgn0000024	CG17907	Ace	0.187724	0.380019	0.61	0.535	1
FBgn0039584	CG14064	beat-VI	0.192302	0.0193587	0.262	0.27	1
FBgn0285944	CG9907	para	0.192941	1.07684	0.859	0.748	1
FBgn0038282	CG33485	dpr9	0.197476	0.0297579	0.489	0.486	1
FBgn0283451	CG11491	br	0.198499	0.0735941	0.175	0.152	1
FBgn0020907	CG14904	Scp2	0.198546	0.0250495	0.153	0.158	1
FBgn0032151	CG4128	nAChRalpha6	0.199196	0.700528	0.824	0.745	1
FBgn0086758	CG31666	chinmo	0.204	0.285661	0.695	0.623	1
FBgn0015399	CG12283	kek1	0.204336	0.143972	0.463	0.438	1
FBgn0261258	CG6014	rgn	0.208225	-0.0310327	0.262	0.265	1
FBgn0034636	CG10440	twz	0.208564	-0.0197459	0.123	0.134	1
FBgn0039420	CG6154	CG6154	0.210262	0.00939694	0.182	0.182	1
FBgn0041707	CG1168	7B2	0.214712	-0.492322	0.873	0.901	1
FBgn0035170	CG12191	dpr20	0.222452	0.0209042	0.12	0.105	1
FBgn0003429	CG10693	slo	0.224595	0.411231	0.696	0.601	1
FBgn0066084	CG30425	RpL41	0.233433	1.27919	0.856	0.512	1
FBgn0265487	CG33197	mbl	0.23653	0.216443	0.541	0.536	1
FBgn0053147	CG33147	Hs3st-A	0.238866	0.307528	0.704	0.626	1
FBgn0050089	CG30089	CG30089	0.23898	0.0126816	0.129	0.121	1
FBgn0002593	CG4087	RpLP1	0.241354	-0.244663	0.722	0.786	1
FBgn0010473	CG15427	tutl	0.24619	0.244014	0.63	0.541	1
FBgn0029123	CG18024	SoxN	0.247687	0.0031108	0.189	0.187	1
FBgn0264442	CG43860	ab	0.249241	-0.0598385	0.217	0.253	1
FBgn0085387	CG34358	shakB	0.251261	0.248035	0.474	0.413	1
FBgn0284245	CG8280	eEF1alpha1	0.254008	-0.0107237	0.292	0.3	1
FBgn0015229	CG6575	glec	0.257664	0.137522	0.311	0.237	1
FBgn0264975	CG1634	Nrg	0.261041	0.0604212	0.239	0.202	1
FBgn0052647	CG32647	CG32647	0.26399	0.0519512	0.24	0.204	1
FBgn0263131	CG43373	CG43373	0.26403	0.00989897	0.108	0.097	1
FBgn0010313	CG2530	corto	0.26962	0.0717169	0.375	0.339	1
FBgn0052062	CG32062	Rbfox1	0.271062	0.563719	0.847	0.795	1
FBgn0003091	CG6622	Pkc53E	0.277804	0.412137	0.584	0.493	1
FBgn0039089	CG10152	beat-IV	0.278636	0.0333886	0.25	0.233	1
FBgn0260462	CG12163	CG12163	0.279175	-0.0326732	0.177	0.201	1
FBgn0052626	CG32626	AMPdeam	0.281993	-0.0250101	0.151	0.171	1
FBgn0085409	CG34380	smal	0.282832	0.0569105	0.288	0.255	1
FBgn0000535	CG10952	eag	0.283521	0.135923	0.331	0.266	1
FBgn0263289	CG43398	scrib	0.28353	0.0391261	0.172	0.15	1
FBgn0053696	CG33696	CNMaR	0.292744	0.0262544	0.118	0.104	1
FBgn0261089	CG5559	Sytalpha	0.29349	0.0495486	0.18	0.151	1
FBgn0031770	CG13995	CG13995	0.297191	0.047519	0.317	0.298	1
FBgn0085412	CG34383	kmr	0.297404	0.0349772	0.25	0.226	1
FBgn0053543	CG33543	CG33543	0.298756	-0.0167947	0.341	0.358	1
FBgn0028481	CG4341	CG4341	0.308717	0.068936	0.207	0.167	1
FBgn0028645	CG7644	beat-Ib	0.310871	0.102481	0.347	0.294	1
FBgn0034286	CG33996	dpr13	0.316704	0.153121	0.384	0.342	1
FBgn0000303	CG12345	ChAT	0.327624	0.00383695	0.554	0.558	1
FBgn0030174	CG15312	CG15312	0.328139	0.0357858	0.238	0.224	1
FBgn0085414	CG34385	dpr12	0.335893	0.0912279	0.453	0.407	1
FBgn0003499	CG7847	sr	0.337443	0.077596	0.28	0.259	1
FBgn0259108	CG34387	futsch	0.339606	0.488581	0.925	0.903	1
FBgn0262869	CG43224	Gfrl	0.346063	0.177622	0.442	0.388	1
FBgn0051361	CG31361	dpr17	0.353655	0.0189373	0.156	0.146	1
FBgn0033250	CG14762	CG14762	0.354754	-0.0362735	0.703	0.708	1
FBgn0051997	CG31997	CG31997	0.35761	0.0485338	0.13	0.118	1
FBgn0083949	CG34113	side-III	0.361581	0.0528262	0.44	0.441	1
FBgn0053517	CG33517	Dop2R	0.366213	0.676129	0.903	0.902	1
FBgn0038321	CG6218	CG6218	0.370349	-0.00659991	0.114	0.124	1
FBgn0259789	CG12701	zld	0.37129	0.047865	0.153	0.138	1
FBgn0261836	CG42768	Msp300	0.372896	0.540287	0.779	0.715	1
FBgn0263397	CG8585	Ih	0.373265	0.318237	0.801	0.759	1
FBgn0052506	CG32506	CG32506	0.381802	0.0641792	0.316	0.287	1
FBgn0262509	CG43079	nrm	0.391589	0.0733664	0.26	0.234	1
FBgn0263980	CG43729	Stacl	0.394126	-0.0495755	0.714	0.72	1
FBgn0000633	CG17716	CG17716	0.395821	0.209427	0.443	0.379	1
FBgn0033438	CG1794	Mmp2	0.407315	0.0243969	0.257	0.253	1
FBgn0011582	CG9652	Dop1R1	0.423035	0.0644589	0.283	0.262	1
FBgn0052264	CG32264	CG32264	0.42747	0.481078	0.749	0.665	1
FBgn0034408	CG12758	sano	0.427905	0.0182076	0.101	0.087	1
FBgn0259244	CG42342	CG42342	0.436503	-0.108093	0.459	0.486	1
FBgn0267252	CG3694	Ggamma30A	0.442817	-0.338252	0.899	0.919	1
FBgn0039816	CG11317	CG11317	0.444358	-0.00528925	0.189	0.188	1
FBgn0051475	CG31475	CG31475	0.445841	-0.00796973	0.106	0.105	1
FBgn0260943	CG32169	Rbp6	0.44676	0.721631	0.84	0.775	1
FBgn0031971	CG7224	Sirup	0.454666	-0.0216106	0.137	0.148	1
FBgn0028370	CG4192	kek3	0.455474	0.0265251	0.129	0.113	1
FBgn0032629	CG15138	beat-IIIc	0.459105	0.148126	0.35	0.313	1
FBgn0261698	CG42732	SLO2	0.461337	0.0645199	0.26	0.221	1
FBgn0003360	CG16944	sesB	0.463433	-0.0251697	0.796	0.82	1
FBgn0004509	CG10772	Fur1	0.467458	0.0324222	0.206	0.187	1
FBgn0024841	CG1963	Pcd	0.472051	-0.0556393	0.352	0.374	1
FBgn0036801	CG6896	MYPT-75D	0.474865	0.0746376	0.271	0.255	1
FBgn0085447	CG34418	sif	0.485146	0.47285	0.562	0.345	1
FBgn0265002	CG44153	CG44153	0.48778	0.0048679	0.269	0.255	1
FBgn0032840	CG13968	sNPF	0.497531	0.0834285	0.204	0.214	1
FBgn0038498	CG14334	beat-IIa	0.498477	0.0886407	0.298	0.262	1
FBgn0261804	CG42750	CG42750	0.499022	0.0700619	0.373	0.345	1
FBgn0085432	CG34403	pan	0.49948	0.840659	0.744	0.561	1
FBgn0000108	CG7727	Appl	0.500508	0.703096	0.866	0.814	1
FBgn0050158	CG30158	CG30158	0.501032	0.0125095	0.115	0.107	1
FBgn0000635	CG3665	Fas2	0.50262	0.0822864	0.277	0.247	1
FBgn0263353	CG11000	CG11000	0.502647	-0.0520659	0.525	0.534	1
FBgn0051665	CG31665	wry	0.511092	0.198567	0.419	0.361	1
FBgn0039380	CG5890	CG5890	0.514678	0.0292881	0.273	0.256	1
FBgn0038084	CG14390	beat-Vc	0.515513	0.0187437	0.146	0.142	1
FBgn0031632	CG15628	CG15628	0.529153	-0.00452007	0.5	0.513	1
FBgn0044328	CG32052	CG32052	0.531905	-0.0665997	0.309	0.338	1
FBgn0013733	CG18076	shot	0.531941	0.088006	0.314	0.266	1
FBgn0039647	CG14509	jus	0.532855	0.0168198	0.438	0.442	1
FBgn0053126	CG33126	NLaz	0.533238	-0.00251015	0.098	0.101	1
FBgn0085407	CG34378	Pvf3	0.539566	0.342587	0.502	0.427	1
FBgn0264908	CG44099	pHCl-1	0.546082	0.124098	0.294	0.239	1
FBgn0004242	CG3139	Syt1	0.555303	0.591675	0.86	0.801	1
FBgn0031414	CG33955	eys	0.568757	0.0651887	0.41	0.407	1
FBgn0267668	CR46006	lncRNA:CR46006	0.572086	0.0402073	0.125	0.104	1
FBgn0259171	CG42276	Pde9	0.574624	0.0108994	0.611	0.62	1
FBgn0053202	CG33202	dpr11	0.586108	0.0688535	0.294	0.259	1
FBgn0266871	CR45332	lncRNA:CR45332	0.589265	0.0126476	0.142	0.142	1
FBgn0053179	CG33179	beat-IIIb	0.591864	-0.0377939	0.338	0.363	1
FBgn0259242	CG42340	CG42340	0.594007	0.0235148	0.277	0.265	1
FBgn0000422	CG10697	Ddc	0.594318	0.213458	0.602	0.572	1
FBgn0085419	CG34390	Rgk2	0.602703	-0.014116	0.193	0.207	1
FBgn0030090	CG12664	fend	0.605117	-0.0138112	0.508	0.515	1
FBgn0010411	CG8900	RpS18	0.608499	-0.525988	0.839	0.913	1
FBgn0033446	CG1648	CG1648	0.614948	-0.0264516	0.233	0.246	1
FBgn0264606	CG43955	Fife	0.62435	0.0203789	0.569	0.57	1
FBgn0261509	CG14351	haf	0.631788	0.0249868	0.153	0.16	1
FBgn0023534	CG17778	CG17778	0.635535	0.051433	0.224	0.199	1
FBgn0259216	CG42316	RhoGAP102A	0.640669	0.0125633	0.118	0.115	1
FBgn0085434	CG34405	NaCP60E	0.642504	0.325753	0.625	0.51	1
FBgn0030412	CG17762	Tomosyn	0.646334	0.180756	0.566	0.468	1
FBgn0038826	CG17838	Syp	0.649365	0.208409	0.455	0.376	1
FBgn0013433	CG4846	beat-Ia	0.656046	-0.0114122	0.221	0.225	1
FBgn0261244	CG33174	inaE	0.661273	0.0192475	0.337	0.339	1
FBgn0029814	CG15765	CG15765	0.664921	0.0946345	0.48	0.48	1
FBgn0052677	CG32677	X11Lbeta	0.672058	0.0935677	0.363	0.332	1
FBgn0014184	CG16747	Oda	0.675545	0.164345	0.692	0.63	1
FBgn0050419	CG30419	CG30419	0.679892	-0.00992586	0.144	0.151	1
FBgn0250908	CG42242	beat-VII	0.68211	0.111831	0.5	0.476	1
FBgn0032048	CG13094	Dh31	0.68226	0.173313	0.122	0.122	1
FBgn0263930	CG4974	dally	0.686718	0.0173685	0.224	0.207	1
FBgn0085383	CG34354	CG34354	0.699388	0.0551983	0.324	0.307	1
FBgn0000575	CG1007	emc	0.70054	0.109063	0.374	0.319	1
FBgn0040532	CG8369	CG8369	0.700752	0.0611348	0.171	0.148	1
FBgn0266418	CG45058	wake	0.703269	0.0140174	0.159	0.142	1
FBgn0000273	CG4379	Pka-C1	0.706413	0.230389	0.626	0.543	1
FBgn0000636	CG5803	Fas3	0.717033	0.0675357	0.254	0.234	1
FBgn0027608	CG2082	CG2082	0.717552	0.0153155	0.35	0.336	1
FBgn0033484	CG2269	CG2269	0.720027	-0.286832	0.824	0.843	1
FBgn0261871	CG33507	dpr2	0.721938	0.00199557	0.172	0.167	1
FBgn0262593	CG43128	Shab	0.732601	0.16006	0.453	0.389	1
FBgn0003423	CG1417	slgA	0.733737	0.0865537	0.39	0.341	1
FBgn0038839	CG10830	Ktl	0.759923	0.0153406	0.345	0.339	1
FBgn0027598	CG31012	cindr	0.766133	0.171972	0.457	0.385	1
FBgn0053143	CG33143	CG33143	0.769513	-0.0228567	0.331	0.342	1
FBgn0013576	CG32464	mtd	0.774241	0.407613	0.727	0.621	1
FBgn0032400	CG6770	CG6770	0.775856	0.17471	0.748	0.728	1
FBgn0010114	CG2040	hig	0.777209	0.0672667	0.52	0.532	1
FBgn0017590	CG6669	klg	0.78388	-0.0668543	0.518	0.539	1
FBgn0266801	CG45263	CG45263	0.79239	0.0173183	0.452	0.447	1
FBgn0032666	CG5758	CG5758	0.796156	0.03381	0.259	0.246	1
FBgn0263392	CG43444	Tet	0.807185	0.0671932	0.566	0.521	1
FBgn0031374	CG7337	Wdr62	0.807506	0.0467946	0.449	0.425	1
FBgn0036844	CG14080	Mkp3	0.807746	0.138135	0.492	0.461	1
FBgn0261999	CG42817	Ca-Ma2d	0.808786	0.00149533	0.236	0.234	1
FBgn0001186	CG3001	Hex-A	0.8132	0.421401	0.549	0.373	1
FBgn0243512	CG7850	puc	0.818874	0.00251732	0.127	0.126	1
FBgn0004880	CG1130	scrt	0.820173	0.187958	0.834	0.821	1
FBgn0000116	CG32031	Argk	0.821326	0.121794	0.724	0.694	1
FBgn0037874	CG4800	Tctp	0.82615	0.00486252	0.369	0.362	1
FBgn0285952	CG3186	eEF5	0.835723	0.0359203	0.343	0.318	1
FBgn0036165	CG7533	chrb	0.839239	0.312017	0.654	0.577	1
FBgn0036043	CG8177	CG8177	0.844772	0.0384968	0.348	0.325	1
FBgn0036934	CG7395	sNPF-R	0.847271	0.00347835	0.099	0.101	1
FBgn0010415	CG10497	Sdc	0.851767	0.0132482	0.701	0.69	1
FBgn0033192	CG2105	Corin	0.854124	0.00884112	0.258	0.254	1
FBgn0011589	CG5076	Elk	0.866935	0.0139027	0.102	0.095	1
FBgn0003435	CG9218	sm	0.86823	0.902203	0.926	0.907	1
FBgn0030723	CG14948	dpr18	0.887526	0.00942024	0.173	0.171	1
FBgn0015400	CG4977	kek2	0.887974	0.0426654	0.375	0.363	1
FBgn0037676	CG8861	CG8861	0.888265	0.0291178	0.257	0.247	1
FBgn0019650	CG11186	toy	0.88848	0.0686401	0.282	0.271	1
FBgn0027589	CG1688	CG1688	0.891936	0.0139816	0.181	0.172	1
FBgn0034138	CG8332	RpS15	0.894026	-0.537859	0.868	0.921	1
FBgn0036494	CG7250	Toll-6	0.895527	0.0397501	0.298	0.284	1
FBgn0000036	CG5610	nAChRalpha1	0.909538	0.120806	0.411	0.369	1
FBgn0004244	CG10537	Rdl	0.913985	0.411251	0.967	0.969	1
FBgn0037475	CG33323	Fer1	0.915543	-0.0254386	0.099	0.103	1
FBgn0260793	CG42573	2mit	0.915719	0.0321963	0.192	0.179	1
FBgn0265296	CG42256	Dscam2	0.916744	0.307443	0.704	0.665	1
FBgn0085370	CG34341	Pde11	0.924564	0.0115037	0.15	0.138	1
FBgn0004611	CG4574	Plc21C	0.928122	0.0527383	0.462	0.447	1
FBgn0267336	CG34360	Glut4EF	0.934441	0.5288	0.796	0.709	1
FBgn0085391	CG34362	trv	0.953242	0.608228	0.654	0.532	1
FBgn0051774	CG31774	fred	0.973141	0.0245636	0.228	0.22	1
FBgn0016061	CG31062	side	0.974868	0.0979695	0.484	0.459	1
FBgn0260657	CG42540	CG42540	0.982594	0.277793	0.741	0.695	1
FBgn0261588	CG42698	pdm3	0.987556	0.0892879	0.344	0.329	1
FBgn0083963	CG34127	Nlg3	0.998841	0.0651707	0.599	0.593	1

## Sheet: Female_C3
FlyBaseID	GeneID	Gene symbol	p_val	avg_diff	pct.1	pct.2	p_val_adj
FBgn0019660	CR32665	lncRNA:roX2	0	-2.82862	0.009	0.866	0
FBgn0013688	CR34096	mt:srRNA	8.64677e-59	0.106271	0.107	0.023	1.29702e-55
FBgn0085753	CR40596	28SrRNA-Psi:CR40596	9.87088e-51	0.123504	0.108	0.022	1.48063e-47
FBgn0004652	CG14307	fru	1.03327e-31	0.494776	0.398	0.213	1.54991e-28
FBgn0003301	CG9533	rut	5.00872e-30	0.113075	0.194	0.114	7.51308e-27
FBgn0002868	CG9470	MtnA	1.7191e-24	0.334459	0.301	0.16	2.57866e-21
FBgn0002940	CG4550	ninaE	2.81552e-24	-0.176621	0.068	0.167	4.22328e-21
FBgn0013995	CG5685	Calx	1.10446e-23	0.130391	0.151	0.068	1.65669e-20
FBgn0058469	CR40469	lncRNA:CR40469	1.43659e-20	0.0737982	0.13	0.084	2.15488e-17
FBgn0065099	CR33925	snRNA:7SK	5.04967e-20	4.14387	0.664	0.411	7.5745e-17
FBgn0042696	CG2380	NfI	1.84032e-18	0.215776	0.273	0.16	2.76048e-15
FBgn0259170	CG42275	alpha-Man-Ia	7.16324e-17	0.139864	0.218	0.145	1.07449e-13
FBgn0033403	CG13739	CG13739	9.11917e-17	0.560164	0.369	0.22	1.36788e-13
FBgn0004619	CG8442	GluRIA	1.66095e-16	0.277337	0.285	0.173	2.49142e-13
FBgn0038665	CG12269	euc	1.76675e-15	0.0699803	0.109	0.066	2.65012e-12
FBgn0087012	CG1056	5-HT2A	4.60514e-15	0.207861	0.211	0.122	6.90771e-12
FBgn0052057	CG32057	dpr10	6.13868e-15	0.126607	0.19	0.123	9.20803e-12
FBgn0264753	CG44011	Rgk1	1.26994e-14	0.0839301	0.112	0.059	1.90491e-11
FBgn0004910	CG15855	Eip63F-1	3.84442e-14	0.145513	0.245	0.17	5.76664e-11
FBgn0001186	CG3001	Hex-A	5.95833e-14	0.719569	0.627	0.397	8.9375e-11
FBgn0051324	CG31324	CG31324	7.28068e-14	0.24995	0.369	0.251	1.0921e-10
FBgn0029768	CG16752	SPR	8.82386e-14	0.131153	0.196	0.125	1.32358e-10
FBgn0031424	CG9887	VGlut	1.14607e-13	2.98649	0.985	0.979	1.71911e-10
FBgn0029824	CG3726	CG3726	1.11424e-12	0.1567	0.228	0.152	1.67136e-09
FBgn0264308	CG43778	CG43778	1.23014e-12	0.205686	0.26	0.165	1.8452e-09
FBgn0036789	CG13702	AstC-R2	2.93442e-12	0.103235	0.119	0.062	4.40162e-09
FBgn0033356	CG8229	CG8229	5.34147e-12	-0.0751847	0.131	0.189	8.01221e-09
FBgn0260971	CG42594	CG42594	5.65627e-12	0.122839	0.217	0.156	8.48441e-09
FBgn0011666	CG5099	msi	2.5546e-11	1.13036	0.694	0.486	3.8319e-08
FBgn0039209	CG13624	REPTOR	7.49549e-11	0.174649	0.287	0.204	1.12432e-07
FBgn0262473	CG5490	Tl	1.90183e-10	0.0812668	0.136	0.081	2.85275e-07
FBgn0260442	CG6831	rhea	2.20318e-10	0.0396731	0.102	0.069	3.30476e-07
FBgn0033987	CG12424	ckn	3.61343e-10	0.0553229	0.111	0.079	5.42014e-07
FBgn0267910	CR34335	lncRNA:CR34335	3.66361e-10	5.5818	0.992	0.942	5.49542e-07
FBgn0038246	CG14853	CG14853	4.32846e-10	0.109313	0.163	0.102	6.49269e-07
FBgn0004395	CG4620	unk	9.19573e-10	0.176234	0.234	0.158	1.37936e-06
FBgn0085447	CG34418	sif	1.33271e-09	0.928462	0.734	0.494	1.99906e-06
FBgn0029663	CG10804	CG10804	1.81852e-09	0.349201	0.487	0.379	2.72779e-06
FBgn0029939	CG9650	CG9650	2.33022e-09	0.474802	0.454	0.349	3.49533e-06
FBgn0260753	CG13758	Pdfr	2.53219e-09	0.0476967	0.104	0.067	3.79828e-06
FBgn0261988	CG17998	Gprk2	6.13293e-09	0.172388	0.305	0.22	9.1994e-06
FBgn0000064	CG6058	Ald1	6.79219e-09	-0.833877	0.701	0.796	1.01883e-05
FBgn0265052	CG44167	St3	1.02464e-08	0.0806961	0.161	0.107	1.53696e-05
FBgn0261649	CG31247	tinc	1.12486e-08	0.0649749	0.128	0.095	1.68729e-05
FBgn0001091	CG12055	Gapdh1	1.15739e-08	-0.183353	0.304	0.396	1.73608e-05
FBgn0023095	CG11282	caps	1.34842e-08	0.0860213	0.149	0.101	2.02262e-05
FBgn0035816	CG13685	CG13685	2.03816e-08	0.0863109	0.187	0.132	3.05723e-05
FBgn0027356	CG8604	Amph	2.21998e-08	0.0811432	0.193	0.144	3.32997e-05
FBgn0010300	CG10719	brat	2.36354e-08	0.218597	0.242	0.147	3.54531e-05
FBgn0013686	CR34094	mt:lrRNA	2.59466e-08	12.3998	0.9	0.553	3.89199e-05
FBgn0261262	CG42613	CG42613	2.69039e-08	0.498609	0.508	0.357	4.03558e-05
FBgn0261260	CG42611	mgl	3.40435e-08	0.105562	0.129	0.074	5.10653e-05
FBgn0052982	CG32982	CG32982	4.0943e-08	0.078314	0.128	0.083	6.14144e-05
FBgn0264000	CG43743	GluRIB	4.83593e-08	0.381939	0.367	0.257	7.25389e-05
FBgn0001085	CG17697	fz	5.16983e-08	0.112428	0.182	0.122	7.75474e-05
FBgn0283499	CG18402	InR	6.00773e-08	0.144812	0.211	0.141	9.0116e-05
FBgn0015519	CG2302	nAChRalpha3	2.06533e-07	0.119212	0.253	0.188	0.000309799
FBgn0052521	CG32521	CG32521	2.50335e-07	0.0517182	0.116	0.089	0.000375503
FBgn0267322	CR45758	lncRNA:CR45758	2.88166e-07	0.0571864	0.108	0.072	0.00043225
FBgn0263994	CG43737	CG43737	3.70342e-07	0.371512	0.413	0.286	0.000555512
FBgn0051690	CG31690	CG31690	4.15799e-07	0.123939	0.197	0.138	0.000623699
FBgn0036454	CG17839	CG17839	4.69901e-07	0.252358	0.302	0.221	0.000704852
FBgn0015777	CG9261	nrv2	6.93475e-07	0.0905881	0.148	0.101	0.00104021
FBgn0000547	CG12676	ed	1.04958e-06	0.132068	0.23	0.179	0.00157437
FBgn0262782	CG5362	Mdh1	1.33256e-06	-0.0239075	0.161	0.195	0.00199884
FBgn0040765	CG33473	luna	1.62729e-06	0.186459	0.302	0.227	0.00244094
FBgn0083228	CG5907	Frq2	1.71709e-06	0.0609982	0.151	0.117	0.00257564
FBgn0066084	CG30425	RpL41	2.86025e-06	1.55014	0.869	0.509	0.00429037
FBgn0031299	CG4629	CG4629	3.2696e-06	0.0542336	0.113	0.073	0.00490439
FBgn0250867	CG42238	CG42238	3.6562e-06	0.12569	0.223	0.156	0.0054843
FBgn0265595	CG44422	CG44422	3.9883e-06	0.246376	0.291	0.209	0.00598246
FBgn0263257	CG43395	Cngl	4.01811e-06	1.36164	0.816	0.708	0.00602717
FBgn0036725	CG18265	CG18265	4.358e-06	0.0506241	0.107	0.069	0.006537
FBgn0003091	CG6622	Pkc53E	5.08789e-06	0.311132	0.406	0.288	0.00763184
FBgn0026160	CG7958	tna	6.53005e-06	0.361335	0.506	0.401	0.00979507
FBgn0014163	CG4609	fax	7.82302e-06	0.413442	0.471	0.314	0.0117345
FBgn0259234	CG42332	Camta	8.39312e-06	0.0332574	0.129	0.106	0.0125897
FBgn0036801	CG6896	MYPT-75D	1.1228e-05	0.0826347	0.187	0.143	0.016842
FBgn0051163	CG31163	SKIP	1.57996e-05	0.20503	0.327	0.263	0.0236994
FBgn0029123	CG18024	SoxN	1.60675e-05	0.32746	0.378	0.302	0.0241013
FBgn0085399	CG34370	CG34370	1.81825e-05	0.078028	0.156	0.117	0.0272738
FBgn0002643	CG8118	mam	1.95753e-05	0.0300707	0.108	0.088	0.0293629
FBgn0052206	CG32206	CG32206	2.5587e-05	0.100962	0.21	0.167	0.0383805
FBgn0261285	CG5629	Ppcs	4.37049e-05	0.00764418	0.111	0.104	0.0655574
FBgn0264975	CG1634	Nrg	5.47977e-05	0.0504544	0.164	0.132	0.0821965
FBgn0000567	CG32180	Eip74EF	5.69096e-05	0.0481644	0.118	0.091	0.0853644
FBgn0024189	CG33141	sns	5.79241e-05	0.0546455	0.118	0.087	0.0868861
FBgn0262160	CG9932	CG9932	7.48214e-05	0.215055	0.328	0.255	0.112232
FBgn0267668	CR46006	lncRNA:CR46006	7.81225e-05	0.19357	0.338	0.272	0.117184
FBgn0019985	CG11144	mGluR	0.000104714	0.105045	0.179	0.133	0.157072
FBgn0083950	CG34114	side-VI	0.000115998	0.309654	0.411	0.324	0.173997
FBgn0028481	CG4341	CG4341	0.000117212	0.156678	0.246	0.184	0.175818
FBgn0028369	CG3653	kirre	0.000129971	0.259181	0.273	0.192	0.194956
FBgn0259821	CG42402	CG42402	0.000162654	0.202374	0.27	0.207	0.243982
FBgn0261046	CG31190	Dscam3	0.000170535	0.0462184	0.159	0.134	0.255803
FBgn0039064	CG4467	CG4467	0.000190627	0.444604	0.46	0.32	0.285941
FBgn0050463	CG30463	Pgant9	0.000233468	0.145105	0.258	0.203	0.350202
FBgn0264273	CG33960	Sema2b	0.000241972	0.0600155	0.144	0.11	0.362959
FBgn0260941	CG42318	app	0.000245972	0.147417	0.249	0.189	0.368958
FBgn0004607	CG1449	zfh2	0.00024754	0.0331968	0.101	0.079	0.37131
FBgn0263512	CG33980	Vsx2	0.000280779	-0.0768908	0.113	0.159	0.421169
FBgn0260003	CG34157	Dys	0.000372603	0.0760991	0.138	0.098	0.558904
FBgn0030913	CG6123	CG6123	0.000408125	-0.00662191	0.113	0.114	0.612187
FBgn0267033	CG45477	mamo	0.000427536	0.794759	0.709	0.608	0.641304
FBgn0085380	CG34351	CG34351	0.000447771	0.0469479	0.113	0.085	0.671657
FBgn0034753	CG2852	CG2852	0.000541209	-0.104975	0.315	0.373	0.811813
FBgn0020269	CG10145	mspo	0.000575259	0.0793366	0.152	0.11	0.862889
FBgn0015229	CG6575	glec	0.000618664	0.272074	0.458	0.382	0.927996
FBgn0085384	CG34355	CG34355	0.000747184	0.393728	0.524	0.453	1
FBgn0085383	CG34354	CG34354	0.00085153	0.0891303	0.192	0.149	1
FBgn0286778	CG46385	CG46385	0.000928176	0.189577	0.247	0.178	1
FBgn0031306	CG4577	CG4577	0.00100916	0.108828	0.161	0.122	1
FBgn0013954	CG11001	Fkbp12	0.00109409	-0.133658	0.303	0.368	1
FBgn0053147	CG33147	Hs3st-A	0.00124797	0.331728	0.485	0.342	1
FBgn0032629	CG15138	beat-IIIc	0.00126338	0.106421	0.16	0.111	1
FBgn0266801	CG45263	CG45263	0.00143448	0.0863621	0.394	0.409	1
FBgn0031971	CG7224	Sirup	0.00154527	-0.0270928	0.098	0.13	1
FBgn0022382	CG15862	Pka-R2	0.00166846	0.138599	0.274	0.214	1
FBgn0259111	CG42253	Ndae1	0.00213411	0.0237058	0.137	0.127	1
FBgn0000042	CG4027	Act5C	0.00217976	0.0294723	0.497	0.507	1
FBgn0287186	CG17594	scro	0.00227424	0.131227	0.229	0.181	1
FBgn0052406	CG32406	PVRAP	0.00235062	0.0461978	0.148	0.125	1
FBgn0264386	CG15899	Ca-alpha1T	0.00238533	1.1263	0.528	0.398	1
FBgn0004198	CG11387	ct	0.00243646	0.908046	0.632	0.521	1
FBgn0250839	CG2016	CG2016	0.00245803	0.0360949	0.157	0.166	1
FBgn0027654	CG2239	jdp	0.00285599	-0.108006	0.539	0.544	1
FBgn0011661	CG10701	Moe	0.00286435	-0.0253359	0.082	0.113	1
FBgn0266100	CG44837	CG44837	0.00290778	0.0442544	0.12	0.098	1
FBgn0264001	CG43744	bru3	0.00308349	0.350517	0.459	0.345	1
FBgn0041605	CG32490	cpx	0.00324403	-0.214971	0.995	0.997	1
FBgn0031632	CG15628	CG15628	0.00338908	0.103214	0.395	0.367	1
FBgn0037153	CG12673	olf413	0.00464108	0.0796201	0.19	0.159	1
FBgn0263706	CG43658	CG43658	0.00470691	0.0122921	0.106	0.107	1
FBgn0039380	CG5890	CG5890	0.00478989	-0.0556929	0.193	0.226	1
FBgn0262737	CG7437	mub	0.00688456	0.84609	0.777	0.635	1
FBgn0027598	CG31012	cindr	0.00708924	0.234579	0.448	0.379	1
FBgn0085413	CG34384	CG34384	0.00776045	0.129185	0.267	0.219	1
FBgn0261574	CG7749	kug	0.00810542	0.029271	0.121	0.099	1
FBgn0015774	CG10521	NetB	0.00875071	0.126647	0.18	0.136	1
FBgn0033484	CG2269	CG2269	0.00891677	-0.220055	0.681	0.729	1
FBgn0263220	CG43388	Hk	0.00940318	0.509928	0.737	0.651	1
FBgn0250910	CG42244	Octbeta3R	0.00940842	0.0768975	0.156	0.124	1
FBgn0243512	CG7850	puc	0.00946393	0.0059478	0.131	0.145	1
FBgn0261556	CG42674	CG42674	0.0101879	-0.155691	0.201	0.246	1
FBgn0037521	CG2993	CG2993	0.0103239	0.100817	0.303	0.246	1
FBgn0031294	CG31795	IA-2	0.0130159	1.97972	0.976	0.956	1
FBgn0033544	CG7220	CG7220	0.0133195	-0.040918	0.193	0.22	1
FBgn0004449	CG5723	Ten-m	0.0138463	0.122566	0.281	0.249	1
FBgn0016061	CG31062	side	0.0141887	0.247293	0.433	0.378	1
FBgn0023179	CG6438	amon	0.0142453	0.0805348	0.254	0.223	1
FBgn0038980	CG6919	Octbeta1R	0.0147976	0.105585	0.164	0.133	1
FBgn0035092	CG3441	Nplp1	0.0148193	0.0597028	0.169	0.161	1
FBgn0085421	CG34392	Epac	0.0150961	0.0759452	0.172	0.135	1
FBgn0040726	CG13439	dpr1	0.0156951	0.093995	0.259	0.214	1
FBgn0030723	CG14948	dpr18	0.0159279	0.0106018	0.122	0.113	1
FBgn0085395	CG34366	Shawl	0.0163284	0.0533914	0.165	0.146	1
FBgn0262593	CG43128	Shab	0.0167182	0.0907272	0.241	0.198	1
FBgn0263397	CG8585	Ih	0.0178526	0.599648	0.882	0.828	1
FBgn0259244	CG42342	CG42342	0.0179361	0.00794532	0.287	0.31	1
FBgn0039349	CG4685	Ssadh	0.0184285	-0.0383188	0.102	0.128	1
FBgn0011818	CG9884	oaf	0.0190612	0.0579897	0.14	0.113	1
FBgn0019643	CG3318	AANAT1	0.0210361	-0.0267463	0.085	0.108	1
FBgn0052066	CG32066	CG32066	0.0229412	0.0432414	0.122	0.097	1
FBgn0040397	CG3655	CG3655	0.0230124	0.0511729	0.126	0.103	1
FBgn0003360	CG16944	sesB	0.0232456	-0.0431149	0.837	0.858	1
FBgn0004168	CG16720	5-HT1A	0.0248421	0.0424053	0.133	0.112	1
FBgn0031016	CG12199	kek5	0.0249513	0.0538761	0.15	0.12	1
FBgn0035499	CG14996	Chd64	0.0259956	0.0270004	0.126	0.109	1
FBgn0000535	CG10952	eag	0.0278921	0.147589	0.28	0.231	1
FBgn0263392	CG43444	Tet	0.0281295	0.191516	0.665	0.65	1
FBgn0015399	CG12283	kek1	0.0292604	0.353915	0.46	0.41	1
FBgn0039054	CG13830	Cow	0.0293987	0.256147	0.414	0.33	1
FBgn0052506	CG32506	CG32506	0.0306622	0.0567925	0.168	0.136	1
FBgn0266871	CR45332	lncRNA:CR45332	0.0315688	0.0647968	0.111	0.092	1
FBgn0003435	CG9218	sm	0.0316954	0.709343	0.869	0.843	1
FBgn0259108	CG34387	futsch	0.0319052	0.310261	0.816	0.767	1
FBgn0086604	CG12484	side-VIII	0.0325278	0.0765352	0.179	0.147	1
FBgn0010411	CG8900	RpS18	0.0326196	-0.71482	0.856	0.942	1
FBgn0002945	CG11614	nkd	0.0327983	0.0753126	0.186	0.155	1
FBgn0085412	CG34383	kmr	0.0343036	0.0747103	0.257	0.222	1
FBgn0051619	CG31619	nolo	0.0348211	0.0454963	0.12	0.095	1
FBgn0040805	CG12355	CG12355	0.0354271	-0.0277447	0.116	0.143	1
FBgn0030174	CG15312	CG15312	0.0355992	0.033811	0.146	0.147	1
FBgn0010412	CG4464	RpS19a	0.0360601	0.0845768	0.263	0.225	1
FBgn0261928	CG42795	CG42795	0.0363337	0.134428	0.296	0.25	1
FBgn0260793	CG42573	2mit	0.0365205	0.0244389	0.136	0.127	1
FBgn0015400	CG4977	kek2	0.0366719	0.0608001	0.367	0.378	1
FBgn0003896	CG10619	tup	0.0368712	0.0558765	0.131	0.115	1
FBgn0000273	CG4379	Pka-C1	0.0368884	0.2607	0.59	0.513	1
FBgn0037525	CG17816	CG17816	0.0381496	0.168602	0.522	0.489	1
FBgn0027339	CG11352	jim	0.0393947	2.03009	0.981	0.946	1
FBgn0001234	CR31400	lncRNA:Hsromega	0.0398884	3.70728	0.979	0.979	1
FBgn0000108	CG7727	Appl	0.0409508	0.776022	0.821	0.759	1
FBgn0259243	CG42341	Pka-R1	0.041242	0.0422707	0.21	0.183	1
FBgn0263773	CG43690	fok	0.0427551	0.0768853	0.213	0.182	1
FBgn0264908	CG44099	pHCl-1	0.0444785	0.131884	0.234	0.185	1
FBgn0000636	CG5803	Fas3	0.0456305	0.0747335	0.153	0.132	1
FBgn0261549	CG42667	rdgA	0.046017	0.240862	0.365	0.315	1
FBgn0052264	CG32264	CG32264	0.0481188	0.406875	0.704	0.635	1
FBgn0024321	CG8524	NK7.1	0.0482374	0.0161354	0.132	0.128	1
FBgn0003429	CG10693	slo	0.0516927	0.495598	0.659	0.555	1
FBgn0051774	CG31774	fred	0.0517776	0.0352964	0.172	0.158	1
FBgn0267428	CG45781	DIP-lambda	0.0527624	0.109892	0.14	0.114	1
FBgn0013973	CG1470	Gycbeta100B	0.0541132	-0.0164279	0.138	0.149	1
FBgn0053543	CG33543	CG33543	0.0575997	0.089856	0.243	0.216	1
FBgn0028644	CG4838	beat-Ic	0.0590113	0.277497	0.284	0.235	1
FBgn0051665	CG31665	wry	0.062928	0.19269	0.385	0.339	1
FBgn0028645	CG7644	beat-Ib	0.0632074	0.106952	0.214	0.18	1
FBgn0085407	CG34378	Pvf3	0.0634017	0.484106	0.541	0.448	1
FBgn0052062	CG32062	Rbfox1	0.063732	0.650959	0.832	0.759	1
FBgn0085432	CG34403	pan	0.0666401	1.33555	0.811	0.695	1
FBgn0263353	CG11000	CG11000	0.0669613	0.104347	0.451	0.423	1
FBgn0264339	CG43795	CG43795	0.0685695	-0.0416001	0.144	0.17	1
FBgn0036935	CG14186	CG14186	0.0704692	0.0556269	0.153	0.125	1
FBgn0083975	CG34139	Nlg4	0.070634	0.0992307	0.221	0.187	1
FBgn0053516	CG33516	dpr3	0.0706967	0.0130554	0.118	0.113	1
FBgn0034286	CG33996	dpr13	0.074738	0.158666	0.27	0.234	1
FBgn0030505	CG11172	NFAT	0.0754996	0.0279634	0.246	0.239	1
FBgn0265296	CG42256	Dscam2	0.0771618	0.491159	0.732	0.668	1
FBgn0051361	CG31361	dpr17	0.0795524	-0.0528345	0.107	0.135	1
FBgn0261552	CG42670	ps	0.0814461	0.0579272	0.966	0.977	1
FBgn0040823	CG14162	dpr6	0.0818409	0.0699957	0.226	0.214	1
FBgn0013467	CG18285	igl	0.0820804	0.637894	0.608	0.492	1
FBgn0030272	CG15201	CG15201	0.0825954	0.0635075	0.158	0.138	1
FBgn0261804	CG42750	CG42750	0.0847149	0.0109635	0.357	0.378	1
FBgn0003499	CG7847	sr	0.0879634	0.0705594	0.118	0.099	1
FBgn0261113	CG17836	Xrp1	0.089922	0.000245745	0.137	0.138	1
FBgn0036494	CG7250	Toll-6	0.0923909	0.0985302	0.269	0.241	1
FBgn0000024	CG17907	Ace	0.0997681	0.364923	0.502	0.4	1
FBgn0267253	CG32700	CG32700	0.10011	0.00930352	0.334	0.355	1
FBgn0037913	CG6783	fabp	0.102288	-0.0304334	0.106	0.125	1
FBgn0033250	CG14762	CG14762	0.102412	0.038591	0.176	0.173	1
FBgn0035170	CG12191	dpr20	0.102849	0.0135498	0.101	0.106	1
FBgn0003274	CG4918	RpLP2	0.103023	0.0166324	0.55	0.528	1
FBgn0000633	CG17716	CG17716	0.108434	0.248345	0.435	0.372	1
FBgn0267336	CG34360	Glut4EF	0.110788	1.20024	0.898	0.868	1
FBgn0029897	CG3203	RpL17	0.111035	-0.324413	0.64	0.751	1
FBgn0052017	CG32017	CG32017	0.11331	0.358679	0.659	0.617	1
FBgn0262509	CG43079	nrm	0.116413	0.0466413	0.143	0.124	1
FBgn0003165	CG9755	pum	0.118711	1.24121	0.795	0.582	1
FBgn0015609	CG7100	CadN	0.11971	0.203812	0.36	0.301	1
FBgn0264606	CG43955	Fife	0.121902	0.0634898	0.387	0.405	1
FBgn0032666	CG5758	CG5758	0.123888	0.0407611	0.146	0.123	1
FBgn0085434	CG34405	NaCP60E	0.128979	0.653476	0.745	0.634	1
FBgn0263995	CG43738	cpo	0.131496	0.39906	0.669	0.598	1
FBgn0004858	CG4220	elB	0.132173	0.0418359	0.121	0.104	1
FBgn0037015	CG13253	cmpy	0.13378	0.0498121	0.176	0.152	1
FBgn0028496	CG30116	CG30116	0.151613	-0.0251214	0.443	0.479	1
FBgn0259171	CG42276	Pde9	0.152009	0.0402902	0.429	0.421	1
FBgn0034725	CG6044	CG6044	0.154002	-0.121038	0.381	0.427	1
FBgn0052677	CG32677	X11Lbeta	0.154384	0.0672755	0.295	0.282	1
FBgn0001233	CG1242	Hsp83	0.156948	-0.0262277	0.541	0.546	1
FBgn0013576	CG32464	mtd	0.157285	0.482341	0.673	0.557	1
FBgn0000422	CG10697	Ddc	0.164721	0.0739956	0.125	0.099	1
FBgn0261597	CG10305	RpS26	0.168313	-0.317816	0.863	0.908	1
FBgn0032797	CG10186	Hasp	0.168857	-0.412097	0.824	0.887	1
FBgn0085400	CG34371	side-V	0.17067	-0.0210928	0.154	0.169	1
FBgn0040532	CG8369	CG8369	0.173432	0.103705	0.178	0.151	1
FBgn0032833	CG10664	COX4	0.175571	-0.79269	0.734	0.871	1
FBgn0267001	CG42338	Ten-a	0.181343	1.21575	0.854	0.66	1
FBgn0036144	CG6207	GlcAT-P	0.181935	0.0172041	0.147	0.147	1
FBgn0032400	CG6770	CG6770	0.185339	0.255005	0.656	0.606	1
FBgn0032901	CG9339	sky	0.192604	0.129439	0.488	0.473	1
FBgn0284243	CG9277	betaTub56D	0.195292	-0.0585939	0.309	0.327	1
FBgn0041707	CG1168	7B2	0.198981	-0.178661	0.683	0.759	1
FBgn0024963	CG7535	GluClalpha	0.205618	0.441753	0.677	0.585	1
FBgn0011656	CG1429	Mef2	0.209545	0.0504215	0.219	0.203	1
FBgn0270928	CG32848	VAChT	0.210283	0.0479087	0.133	0.111	1
FBgn0030090	CG12664	fend	0.212452	0.00587726	0.26	0.272	1
FBgn0052432	CG32432	CG32432	0.213756	0.0319787	0.304	0.297	1
FBgn0010415	CG10497	Sdc	0.214205	0.177279	0.671	0.611	1
FBgn0000116	CG32031	Argk	0.214445	0.120011	0.814	0.838	1
FBgn0263930	CG4974	dally	0.215628	0.0470774	0.206	0.184	1
FBgn0038237	CG8279	Pde6	0.223003	0.251921	0.404	0.342	1
FBgn0001078	CG4059	ftz-f1	0.238975	0.285137	0.454	0.413	1
FBgn0038839	CG10830	Ktl	0.239948	-0.00942108	0.24	0.25	1
FBgn0014184	CG16747	Oda	0.24304	0.257245	0.646	0.547	1
FBgn0033268	CG2297	Obp44a	0.247108	0.0393321	0.196	0.211	1
FBgn0034978	CG3257	CG3257	0.247494	0.0161657	0.14	0.144	1
FBgn0051221	CG31221	CG31221	0.249896	0.599959	0.654	0.433	1
FBgn0010313	CG2530	corto	0.255241	0.0775394	0.28	0.255	1
FBgn0037874	CG4800	Tctp	0.255371	-0.000141392	0.409	0.428	1
FBgn0004580	CG6702	Cbp53E	0.257075	0.318646	0.419	0.321	1
FBgn0262869	CG43224	Gfrl	0.25859	0.125923	0.338	0.295	1
FBgn0002593	CG4087	RpLP1	0.25867	-0.374718	0.726	0.84	1
FBgn0020907	CG14904	Scp2	0.258753	-0.0508251	0.252	0.277	1
FBgn0085382	CG34353	CG34353	0.258769	0.050636	0.18	0.17	1
FBgn0031770	CG13995	CG13995	0.261818	-0.0035261	0.118	0.117	1
FBgn0261836	CG42768	Msp300	0.270363	0.624163	0.757	0.658	1
FBgn0030432	CG4404	CG4404	0.271966	0.0348349	0.151	0.138	1
FBgn0013733	CG18076	shot	0.273394	0.0829374	0.258	0.238	1
FBgn0030412	CG17762	Tomosyn	0.273946	0.200659	0.606	0.538	1
FBgn0264574	CG43946	Glut1	0.27567	0.127875	0.298	0.259	1
FBgn0085414	CG34385	dpr12	0.279213	0.121339	0.366	0.332	1
FBgn0066101	CG31094	LpR1	0.281904	0.0512335	0.138	0.122	1
FBgn0284245	CG8280	eEF1alpha1	0.28279	0.004645	0.275	0.286	1
FBgn0035495	CG14989	CG14989	0.286603	0.256829	0.482	0.399	1
FBgn0260943	CG32169	Rbp6	0.290817	1.12573	0.944	0.901	1
FBgn0083949	CG34113	side-III	0.295691	0.074642	0.369	0.355	1
FBgn0028370	CG4192	kek3	0.29596	0.0279309	0.163	0.15	1
FBgn0010113	CG15532	hdc	0.296524	0.353277	0.375	0.25	1
FBgn0039617	CG14521	DIP-gamma	0.302811	-0.000970741	0.102	0.102	1
FBgn0264490	CG18389	Eip93F	0.304514	0.313696	0.353	0.296	1
FBgn0010263	CG3151	Rbp9	0.305173	0.208969	0.363	0.316	1
FBgn0038653	CG18208	Octalpha2R	0.318473	0.0550942	0.375	0.387	1
FBgn0044328	CG32052	CG32052	0.319201	-0.0278719	0.113	0.128	1
FBgn0285948	CG15442	RpL27A	0.320082	0.292404	0.782	0.775	1
FBgn0000575	CG1007	emc	0.320393	0.139901	0.42	0.406	1
FBgn0262738	CG3620	norpA	0.320689	-0.00413869	0.401	0.415	1
FBgn0031414	CG33955	eys	0.323558	0.123188	0.338	0.316	1
FBgn0261698	CG42732	SLO2	0.32724	0.0663827	0.215	0.189	1
FBgn0086758	CG31666	chinmo	0.335317	0.475268	0.662	0.569	1
FBgn0037941	CG12594	CG12594	0.336176	0.0496292	0.122	0.107	1
FBgn0266851	CR45312	lncRNA:CR45312	0.336338	-0.0966715	0.274	0.296	1
FBgn0039584	CG14064	beat-VI	0.337423	0.0454683	0.185	0.178	1
FBgn0263289	CG43398	scrib	0.344197	0.0291535	0.136	0.123	1
FBgn0039420	CG6154	CG6154	0.360915	0.0107896	0.116	0.115	1
FBgn0031258	CG4297	CG4297	0.363753	0.00385655	0.098	0.101	1
FBgn0086778	CG32538	nAChRalpha7	0.377452	0.179577	0.529	0.464	1
FBgn0027589	CG1688	CG1688	0.387371	0.0107203	0.207	0.212	1
FBgn0036043	CG8177	CG8177	0.393667	0.00685638	0.222	0.232	1
FBgn0052647	CG32647	CG32647	0.393865	0.0110414	0.217	0.225	1
FBgn0034731	CG10384	CG10384	0.395737	0.00306167	0.117	0.12	1
FBgn0285952	CG3186	eEF5	0.407693	-0.0109635	0.254	0.265	1
FBgn0000179	CG3578	bi	0.407896	0.0842135	0.118	0.101	1
FBgn0000411	CG5893	D	0.425134	-0.0304711	0.174	0.19	1
FBgn0267252	CG3694	Ggamma30A	0.425491	0.349052	0.959	0.963	1
FBgn0013981	CG3379	His4r	0.442469	0.0717514	0.943	0.937	1
FBgn0083991	CG34155	CG34155	0.449544	0.0342181	0.145	0.138	1
FBgn0264087	CG43756	Slob	0.458046	-0.00322206	0.156	0.163	1
FBgn0034138	CG8332	RpS15	0.464907	-0.505052	0.879	0.927	1
FBgn0261871	CG33507	dpr2	0.466368	0.0167255	0.139	0.144	1
FBgn0038063	CG33976	Octbeta2R	0.469723	0.224849	0.463	0.412	1
FBgn0030574	CG9413	sbm	0.476319	0.0393411	0.124	0.112	1
FBgn0001319	CG10197	kn	0.477773	0.0805373	0.108	0.103	1
FBgn0035032	CG4692	ATPsynF	0.479047	-0.501323	0.792	0.877	1
FBgn0083963	CG34127	Nlg3	0.481747	0.239822	0.541	0.501	1
FBgn0004369	CG11516	Ptp99A	0.483225	0.468743	0.635	0.525	1
FBgn0053517	CG33517	Dop2R	0.490271	0.348108	0.815	0.745	1
FBgn0004509	CG10772	Fur1	0.491826	0.0274303	0.191	0.189	1
FBgn0000037	CG4356	mAChR-A	0.502681	0.018493	0.27	0.276	1
FBgn0011224	CG31000	heph	0.506171	0.635911	0.554	0.425	1
FBgn0264895	CG44086	RapGAP1	0.50774	0.254392	0.447	0.391	1
FBgn0265597	CG44424	rad	0.508919	0.124576	0.266	0.226	1
FBgn0000097	CG3166	aop	0.510195	0.00124161	0.185	0.198	1
FBgn0005775	CG7503	Con	0.512794	0.420587	0.463	0.342	1
FBgn0259213	CG42313	side-II	0.515529	0.0614072	0.322	0.298	1
FBgn0033192	CG2105	Corin	0.518908	0.00683061	0.345	0.35	1
FBgn0053143	CG33143	CG33143	0.543764	-0.019371	0.146	0.156	1
FBgn0032151	CG4128	nAChRalpha6	0.544094	0.55105	0.56	0.397	1
FBgn0052698	CG32698	CARPB	0.544871	0.107941	0.12	0.108	1
FBgn0011582	CG9652	Dop1R1	0.545807	0.0223573	0.111	0.103	1
FBgn0259242	CG42340	CG42340	0.550859	-6.44154e-07	0.287	0.289	1
FBgn0261244	CG33174	inaE	0.556073	0.0459124	0.4	0.406	1
FBgn0028704	CG18660	Nckx30C	0.560986	0.330571	0.794	0.82	1
FBgn0038156	CG14372	side-IV	0.561015	0.02334	0.11	0.107	1
FBgn0265487	CG33197	mbl	0.56138	0.175622	0.287	0.23	1
FBgn0027608	CG2082	CG2082	0.568784	0.0161638	0.409	0.417	1
FBgn0016797	CG9739	fz2	0.570747	0.0624279	0.172	0.157	1
FBgn0031897	CG13784	CG13784	0.574135	0.014079	0.275	0.279	1
FBgn0260660	CG42543	Mp	0.574343	0.039486	0.317	0.316	1
FBgn0038498	CG14334	beat-IIa	0.582962	0.0522741	0.221	0.206	1
FBgn0053179	CG33179	beat-IIIb	0.587119	0.0171287	0.232	0.235	1
FBgn0033196	CG1358	CG1358	0.588001	0.0378531	0.15	0.145	1
FBgn0000635	CG3665	Fas2	0.591041	0.0470072	0.159	0.142	1
FBgn0042630	CG32139	Sox21b	0.601433	0.0729814	0.165	0.154	1
FBgn0033446	CG1648	CG1648	0.60671	-0.0154439	0.092	0.103	1
FBgn0053202	CG33202	dpr11	0.608169	0.0755838	0.284	0.266	1
FBgn0085387	CG34358	shakB	0.624319	0.120007	0.312	0.283	1
FBgn0260657	CG42540	CG42540	0.635633	0.347087	0.59	0.494	1
FBgn0260658	CG42541	CG42541	0.636076	-0.318883	0.495	0.543	1
FBgn0036927	CG7433	Gabat	0.63921	0.000422565	0.187	0.191	1
FBgn0003380	CG12348	Sh	0.639404	1.97758	0.939	0.918	1
FBgn0040297	CG9256	Nhe2	0.642034	0.0244196	0.11	0.101	1
FBgn0033405	CG13954	CG13954	0.645966	0.0350565	0.215	0.209	1
FBgn0264442	CG43860	ab	0.658318	0.0143347	0.175	0.174	1
FBgn0029761	CG10706	SK	0.661237	0.366533	0.488	0.388	1
FBgn0265002	CG44153	CG44153	0.662092	0.0477122	0.216	0.208	1
FBgn0263219	CG42330	Dscam4	0.664157	0.0733969	0.234	0.22	1
FBgn0033438	CG1794	Mmp2	0.669227	0.0174183	0.248	0.245	1
FBgn0031835	CG11319	CG11319	0.670532	0.0890234	0.289	0.283	1
FBgn0085420	CG34391	DIP-delta	0.678791	0.0416565	0.107	0.106	1
FBgn0032840	CG13968	sNPF	0.691064	0.048691	0.203	0.2	1
FBgn0041094	CG7590	scyl	0.697371	0.282869	0.48	0.447	1
FBgn0010452	CG11280	trn	0.699705	-0.00642802	0.093	0.103	1
FBgn0261089	CG5559	Sytalpha	0.707184	0.0124399	0.102	0.101	1
FBgn0023534	CG17778	CG17778	0.711706	0.0038237	0.17	0.177	1
FBgn0028875	CG32975	nAChRalpha5	0.713307	0.627318	0.69	0.615	1
FBgn0036844	CG14080	Mkp3	0.725034	0.147476	0.396	0.357	1
FBgn0038282	CG33485	dpr9	0.731123	0.053259	0.288	0.269	1
FBgn0086677	CG30040	jeb	0.733688	0.178992	0.281	0.255	1
FBgn0039647	CG14509	jus	0.739788	0.190337	0.413	0.388	1
FBgn0005658	CG7018	Ets65A	0.743119	0.0512599	0.229	0.223	1
FBgn0036165	CG7533	chrb	0.749432	0.474232	0.602	0.486	1
FBgn0014859	CG1864	Hr38	0.773534	-0.19988	0.235	0.279	1
FBgn0014343	CG10601	mirr	0.778521	0.0289232	0.111	0.105	1
FBgn0017590	CG6669	klg	0.790818	0.0439767	0.449	0.45	1
FBgn0085409	CG34380	smal	0.793982	0.0413863	0.167	0.161	1
FBgn0050089	CG30089	CG30089	0.795454	-0.0064789	0.115	0.125	1
FBgn0004242	CG3139	Syt1	0.797004	0.987367	0.911	0.903	1
FBgn0039089	CG10152	beat-IV	0.811865	-0.00233023	0.121	0.13	1
FBgn0031374	CG7337	Wdr62	0.811919	0.0624988	0.428	0.424	1
FBgn0004595	CG17228	pros	0.820637	1.55126	0.88	0.769	1
FBgn0033108	CG15236	CG15236	0.824055	0.0609167	0.25	0.248	1
FBgn0264815	CG44007	Pde1c	0.826908	0.0539402	0.187	0.17	1
FBgn0264503	CG43902	CG43902	0.827707	0.0787778	0.216	0.201	1
FBgn0265182	CG44247	CG44247	0.829228	0.0155853	0.139	0.137	1
FBgn0004880	CG1130	scrt	0.868646	0.361256	0.919	0.907	1
FBgn0264006	CG43749	dysc	0.86874	0.507198	0.787	0.744	1
FBgn0052626	CG32626	AMPdeam	0.87245	-0.00456448	0.113	0.119	1
FBgn0250908	CG42242	beat-VII	0.893755	0.0352298	0.198	0.192	1
FBgn0037171	CG14459	CG14459	0.900912	0.0150001	0.104	0.105	1
FBgn0004611	CG4574	Plc21C	0.901348	0.0347605	0.354	0.354	1
FBgn0003423	CG1417	slgA	0.901736	0.246479	0.595	0.549	1
FBgn0004244	CG10537	Rdl	0.913364	0.62984	0.912	0.896	1
FBgn0261788	CG42734	Ank2	0.923371	0.531034	0.699	0.581	1
FBgn0263980	CG43729	Stacl	0.929697	0.0286034	0.507	0.489	1
FBgn0010473	CG15427	tutl	0.93398	0.329243	0.607	0.514	1
FBgn0285944	CG9907	para	0.945109	1.44839	0.883	0.829	1
FBgn0000036	CG5610	nAChRalpha1	0.949568	0.160403	0.358	0.334	1
FBgn0030897	CG5744	Frq1	0.956332	0.859698	0.76	0.643	1
FBgn0266137	CG18741	Dop1R2	0.960832	0.0107799	0.1	0.104	1
FBgn0038826	CG17838	Syp	0.963601	0.337755	0.548	0.46	1
FBgn0085391	CG34362	trv	0.966489	0.520517	0.493	0.38	1
FBgn0037676	CG8861	CG8861	0.970802	0.0928896	0.319	0.305	1
FBgn0029814	CG15765	CG15765	0.978825	0.120188	0.344	0.315	1
FBgn0010114	CG2040	hig	0.982024	0.143913	0.49	0.453	1
FBgn0052600	CG32600	dpr8	0.985047	0.165242	0.392	0.376	1
FBgn0001235	CG17117	hth	0.995499	0.226417	0.359	0.284	1

## Sheet: Female_C4
FlyBaseID	GeneID	Gene symbol	p_val	avg_diff	pct.1	pct.2	p_val_adj
FBgn0019660	CR32665	lncRNA:roX2	0	-3.46959	0.01	0.906	0
FBgn0085753	CR40596	28SrRNA-Psi:CR40596	2.42541e-44	0.134428	0.118	0.025	3.63812e-41
FBgn0042696	CG2380	NfI	2.29514e-30	0.189706	0.239	0.116	3.44271e-27
FBgn0002868	CG9470	MtnA	1.90329e-29	0.256619	0.281	0.143	2.85493e-26
FBgn0038246	CG14853	CG14853	4.18339e-28	0.180887	0.204	0.087	6.27509e-25
FBgn0052057	CG32057	dpr10	1.24419e-27	0.168744	0.221	0.111	1.86628e-24
FBgn0003301	CG9533	rut	1.24738e-25	0.143684	0.184	0.091	1.87107e-22
FBgn0065099	CR33925	snRNA:7SK	5.90386e-25	5.12821	0.649	0.473	8.85579e-22
FBgn0052683	CG32683	CG32683	1.96895e-24	0.242583	0.228	0.106	2.95342e-21
FBgn0029768	CG16752	SPR	6.66541e-23	0.133983	0.164	0.076	9.99812e-20
FBgn0013995	CG5685	Calx	2.01029e-22	0.17072	0.162	0.055	3.01544e-19
FBgn0033987	CG12424	ckn	2.27176e-19	0.136749	0.169	0.084	3.40764e-16
FBgn0038665	CG12269	euc	2.08871e-18	0.0705422	0.108	0.063	3.13307e-15
FBgn0265595	CG44422	CG44422	6.66586e-18	0.22949	0.236	0.116	9.99879e-15
FBgn0087012	CG1056	5-HT2A	2.2762e-17	0.0803436	0.112	0.054	3.4143e-14
FBgn0058469	CR40469	lncRNA:CR40469	4.02638e-17	0.0822131	0.135	0.083	6.03957e-14
FBgn0010300	CG10719	brat	4.17684e-17	0.256518	0.281	0.166	6.26526e-14
FBgn0011693	CG4899	Pdh	1.11192e-16	-0.15599	0.032	0.104	1.66787e-13
FBgn0051324	CG31324	CG31324	1.27675e-16	0.291362	0.365	0.219	1.91512e-13
FBgn0259170	CG42275	alpha-Man-Ia	1.32845e-16	0.22641	0.245	0.148	1.99267e-13
FBgn0265052	CG44167	St3	2.01914e-16	0.128345	0.239	0.157	3.02871e-13
FBgn0004395	CG4620	unk	4.5558e-16	0.138262	0.201	0.128	6.83371e-13
FBgn0000121	CG5962	Arr2	2.06891e-15	-0.150022	0.065	0.131	3.10337e-12
FBgn0004910	CG15855	Eip63F-1	5.51459e-15	0.103175	0.166	0.099	8.27188e-12
FBgn0286778	CG46385	CG46385	8.0113e-15	0.263242	0.263	0.138	1.20169e-11
FBgn0261262	CG42613	CG42613	1.92504e-14	0.397902	0.409	0.248	2.88755e-11
FBgn0004652	CG14307	fru	2.4985e-14	0.341393	0.283	0.157	3.74774e-11
FBgn0015777	CG9261	nrv2	8.75142e-14	0.0668358	0.154	0.107	1.31271e-10
FBgn0052206	CG32206	CG32206	3.00124e-13	0.160313	0.248	0.161	4.50186e-10
FBgn0027356	CG8604	Amph	3.2808e-13	0.0914745	0.163	0.1	4.92119e-10
FBgn0014163	CG4609	fax	3.28083e-13	0.503959	0.509	0.285	4.92124e-10
FBgn0264000	CG43743	GluRIB	3.70247e-13	0.258162	0.284	0.165	5.55371e-10
FBgn0039064	CG4467	CG4467	2.72263e-12	0.419612	0.449	0.278	4.08394e-09
FBgn0004619	CG8442	GluRIA	3.51771e-12	0.151565	0.201	0.135	5.27656e-09
FBgn0262160	CG9932	CG9932	4.00579e-12	0.195225	0.299	0.199	6.00869e-09
FBgn0283499	CG18402	InR	4.10068e-12	0.123496	0.199	0.128	6.15103e-09
FBgn0052982	CG32982	CG32982	1.2895e-11	0.101065	0.129	0.066	1.93425e-08
FBgn0019662	CG8593	qm	1.40306e-11	0.0754919	0.131	0.076	2.10459e-08
FBgn0011666	CG5099	msi	1.67831e-11	1.08149	0.68	0.423	2.51746e-08
FBgn0000547	CG12676	ed	2.76782e-11	0.13928	0.215	0.15	4.15172e-08
FBgn0083950	CG34114	side-VI	2.92797e-11	0.343164	0.399	0.256	4.39196e-08
FBgn0264308	CG43778	CG43778	2.93423e-11	0.108238	0.168	0.107	4.40134e-08
FBgn0052521	CG32521	CG32521	3.47156e-11	0.0596635	0.108	0.069	5.20734e-08
FBgn0083228	CG5907	Frq2	1.49201e-10	0.198228	0.233	0.138	2.23802e-07
FBgn0033403	CG13739	CG13739	1.5466e-10	0.20433	0.182	0.096	2.3199e-07
FBgn0085447	CG34418	sif	1.55052e-10	0.885735	0.695	0.436	2.32578e-07
FBgn0019985	CG11144	mGluR	1.58562e-10	0.113098	0.195	0.127	2.37844e-07
FBgn0051163	CG31163	SKIP	2.1365e-10	0.116799	0.223	0.157	3.20476e-07
FBgn0002940	CG4550	ninaE	2.48598e-10	-0.243399	0.071	0.142	3.72897e-07
FBgn0260971	CG42594	CG42594	2.52986e-10	0.10638	0.162	0.105	3.79479e-07
FBgn0040765	CG33473	luna	6.29396e-10	0.146096	0.277	0.199	9.44094e-07
FBgn0015519	CG2302	nAChRalpha3	9.53543e-10	0.164889	0.281	0.196	1.43031e-06
FBgn0085413	CG34384	CG34384	1.88111e-09	0.0755631	0.238	0.184	2.82166e-06
FBgn0085399	CG34370	CG34370	3.61289e-09	0.0690228	0.129	0.085	5.41933e-06
FBgn0004858	CG4220	elB	5.39179e-09	0.0371762	0.166	0.135	8.08768e-06
FBgn0031306	CG4577	CG4577	5.7051e-09	0.219208	0.177	0.094	8.55764e-06
FBgn0001186	CG3001	Hex-A	7.07121e-09	0.523018	0.503	0.302	1.06068e-05
FBgn0051221	CG31221	CG31221	7.38016e-09	2.81307	0.957	0.871	1.10702e-05
FBgn0261988	CG17998	Gprk2	7.58303e-09	0.175492	0.346	0.26	1.13745e-05
FBgn0003091	CG6622	Pkc53E	1.11416e-08	0.294475	0.383	0.256	1.67124e-05
FBgn0024189	CG33141	sns	1.12715e-08	0.0734354	0.123	0.07	1.69073e-05
FBgn0267668	CR46006	lncRNA:CR46006	1.16786e-08	0.169299	0.292	0.221	1.75179e-05
FBgn0261260	CG42611	mgl	1.37648e-08	0.0534497	0.105	0.076	2.06472e-05
FBgn0259234	CG42332	Camta	1.76914e-08	0.0686816	0.147	0.095	2.65371e-05
FBgn0051690	CG31690	CG31690	1.91886e-08	0.0974984	0.17	0.113	2.8783e-05
FBgn0264975	CG1634	Nrg	2.08359e-08	0.0641829	0.16	0.118	3.12539e-05
FBgn0029824	CG3726	CG3726	2.39894e-08	0.16691	0.219	0.151	3.59841e-05
FBgn0086604	CG12484	side-VIII	3.47751e-08	0.0601145	0.125	0.078	5.21627e-05
FBgn0020269	CG10145	mspo	3.69638e-08	0.103825	0.181	0.121	5.54458e-05
FBgn0052204	CG32204	CG32204	3.7907e-08	0.022057	0.131	0.117	5.68606e-05
FBgn0259111	CG42253	Ndae1	4.0008e-08	0.0267842	0.115	0.087	6.0012e-05
FBgn0039209	CG13624	REPTOR	4.27678e-08	0.134425	0.254	0.191	6.41518e-05
FBgn0031736	CG11030	CG11030	5.86689e-08	0.0691089	0.121	0.077	8.80034e-05
FBgn0250867	CG42238	CG42238	6.86004e-08	0.137428	0.277	0.219	0.000102901
FBgn0000567	CG32180	Eip74EF	7.23809e-08	0.0583578	0.119	0.077	0.000108571
FBgn0031299	CG4629	CG4629	7.44519e-08	0.102267	0.164	0.106	0.000111678
FBgn0013718	CG33991	nuf	7.65435e-08	0.0746135	0.108	0.058	0.000114815
FBgn0035756	CG32381	unc-13-4A	1.23458e-07	0.061349	0.125	0.08	0.000185186
FBgn0083975	CG34139	Nlg4	1.84125e-07	0.0317131	0.182	0.154	0.000276188
FBgn0052677	CG32677	X11Lbeta	2.20057e-07	0.0843081	0.275	0.228	0.000330085
FBgn0015774	CG10521	NetB	2.25109e-07	0.136482	0.238	0.175	0.000337664
FBgn0260003	CG34157	Dys	2.56881e-07	0.0684946	0.165	0.117	0.000385322
FBgn0010263	CG3151	Rbp9	3.15454e-07	0.269097	0.382	0.278	0.000473181
FBgn0264574	CG43946	Glut1	3.76272e-07	0.211291	0.338	0.251	0.000564408
FBgn0004449	CG5723	Ten-m	5.95568e-07	0.162126	0.256	0.18	0.000893352
FBgn0011818	CG9884	oaf	7.44838e-07	0.040203	0.104	0.07	0.00111726
FBgn0039420	CG6154	CG6154	7.64504e-07	0.060441	0.125	0.087	0.00114676
FBgn0267910	CR34335	lncRNA:CR34335	8.29624e-07	6.17246	0.996	0.954	0.00124444
FBgn0029663	CG10804	CG10804	8.72933e-07	0.073928	0.149	0.105	0.0013094
FBgn0036935	CG14186	CG14186	9.97373e-07	0.0585833	0.134	0.084	0.00149606
FBgn0029939	CG9650	CG9650	1.02329e-06	0.520968	0.444	0.341	0.00153494
FBgn0015229	CG6575	glec	1.12864e-06	0.302249	0.418	0.318	0.00169295
FBgn0263257	CG43395	Cngl	1.25581e-06	1.51883	0.822	0.647	0.00188371
FBgn0267322	CR45758	lncRNA:CR45758	1.37694e-06	0.0579038	0.114	0.08	0.0020654
FBgn0013733	CG18076	shot	1.83634e-06	0.152242	0.247	0.168	0.0027545
FBgn0028369	CG3653	kirre	1.85724e-06	0.364233	0.332	0.227	0.00278586
FBgn0030574	CG9413	sbm	2.22057e-06	0.0593074	0.124	0.085	0.00333086
FBgn0050463	CG30463	Pgant9	2.47837e-06	0.123339	0.199	0.138	0.00371755
FBgn0001091	CG12055	Gapdh1	3.06901e-06	-0.103335	0.274	0.325	0.00460351
FBgn0037153	CG12673	olf413	3.90527e-06	0.0894567	0.172	0.123	0.00585791
FBgn0259677	CG42346	CG42346	4.1389e-06	0.0878305	0.125	0.08	0.00620835
FBgn0033356	CG8229	CG8229	4.31074e-06	-0.0474287	0.11	0.146	0.00646611
FBgn0036789	CG13702	AstC-R2	6.51882e-06	0.120354	0.111	0.065	0.00977822
FBgn0033196	CG1358	CG1358	7.02103e-06	0.041479	0.108	0.078	0.0105315
FBgn0263994	CG43737	CG43737	8.91958e-06	0.45174	0.479	0.34	0.0133794
FBgn0264908	CG44099	pHCl-1	1.16678e-05	0.285356	0.34	0.241	0.0175017
FBgn0085421	CG34392	Epac	1.70319e-05	0.0950533	0.214	0.157	0.0255479
FBgn0033368	CG13743	CG13743	1.87507e-05	0.0271225	0.122	0.111	0.028126
FBgn0040397	CG3655	CG3655	2.11653e-05	0.15369	0.228	0.161	0.031748
FBgn0001078	CG4059	ftz-f1	2.47459e-05	0.313487	0.477	0.386	0.0371188
FBgn0022382	CG15862	Pka-R2	2.7912e-05	0.142251	0.279	0.214	0.041868
FBgn0250910	CG42244	Octbeta3R	4.01936e-05	0.10581	0.176	0.12	0.0602904
FBgn0066101	CG31094	LpR1	4.67695e-05	0.049678	0.103	0.068	0.0701543
FBgn0263511	CG4136	Vsx1	4.92194e-05	0.0760972	0.136	0.094	0.0738291
FBgn0261089	CG5559	Sytalpha	5.1422e-05	0.087964	0.197	0.15	0.0771329
FBgn0085382	CG34353	CG34353	5.36153e-05	0.110398	0.231	0.18	0.080423
FBgn0002643	CG8118	mam	5.97281e-05	0.0887623	0.164	0.125	0.0895921
FBgn0051665	CG31665	wry	6.01878e-05	0.223677	0.372	0.285	0.0902817
FBgn0035816	CG13685	CG13685	6.45256e-05	0.0820084	0.186	0.143	0.0967884
FBgn0036454	CG17839	CG17839	6.65384e-05	0.186433	0.276	0.21	0.0998076
FBgn0013686	CR34094	mt:lrRNA	7.91195e-05	12.2771	0.909	0.499	0.118679
FBgn0262509	CG43079	nrm	8.29343e-05	0.0383691	0.134	0.111	0.124401
FBgn0031016	CG12199	kek5	0.000103006	0.0786106	0.139	0.088	0.154509
FBgn0262593	CG43128	Shab	0.000103268	0.178344	0.326	0.248	0.154903
FBgn0259821	CG42402	CG42402	0.000118695	0.205051	0.292	0.226	0.178042
FBgn0035032	CG4692	ATPsynF	0.000145508	-0.385664	0.778	0.842	0.218262
FBgn0266100	CG44837	CG44837	0.000159748	0.0461586	0.117	0.089	0.239621
FBgn0023179	CG6438	amon	0.000164392	0.0608979	0.228	0.201	0.246589
FBgn0037956	CG6959	CG6959	0.000167874	0.0647408	0.113	0.074	0.251811
FBgn0287186	CG17594	scro	0.00017809	0.179812	0.344	0.282	0.267135
FBgn0004198	CG11387	ct	0.000202168	1.44411	0.694	0.572	0.303252
FBgn0261113	CG17836	Xrp1	0.000210522	0.086507	0.175	0.119	0.315784
FBgn0267181	CR45621	asRNA:CR45621	0.000222038	0.107362	0.106	0.063	0.333058
FBgn0016797	CG9739	fz2	0.000224583	0.107778	0.206	0.159	0.336874
FBgn0003326	CG17579	sca	0.000247521	0.0197335	0.112	0.099	0.371281
FBgn0284245	CG8280	eEF1alpha1	0.000247747	0.0354491	0.252	0.215	0.37162
FBgn0264490	CG18389	Eip93F	0.000256264	0.232114	0.287	0.213	0.384396
FBgn0263706	CG43658	CG43658	0.000264678	0.00159055	0.115	0.12	0.397016
FBgn0032833	CG10664	COX4	0.000298573	-0.69478	0.721	0.863	0.44786
FBgn0052066	CG32066	CG32066	0.000309324	0.023523	0.102	0.084	0.463986
FBgn0027339	CG11352	jim	0.000309486	2.6991	0.979	0.972	0.464228
FBgn0051619	CG31619	nolo	0.000349668	0.0645657	0.143	0.1	0.524502
FBgn0030505	CG11172	NFAT	0.000385694	0.0919879	0.237	0.187	0.57854
FBgn0028481	CG4341	CG4341	0.000391869	0.149393	0.195	0.134	0.587804
FBgn0032629	CG15138	beat-IIIc	0.000418531	0.277145	0.278	0.211	0.627797
FBgn0036144	CG6207	GlcAT-P	0.000481952	0.0650761	0.162	0.129	0.722928
FBgn0052506	CG32506	CG32506	0.00048303	0.0686311	0.204	0.17	0.724545
FBgn0000535	CG10952	eag	0.000609876	0.110775	0.279	0.235	0.914814
FBgn0083963	CG34127	Nlg3	0.000764106	0.479361	0.664	0.607	1
FBgn0003499	CG7847	sr	0.000785617	0.0938722	0.117	0.072	1
FBgn0261552	CG42670	ps	0.00080951	-0.0073385	0.949	0.973	1
FBgn0259244	CG42342	CG42342	0.000869308	0.0811626	0.328	0.359	1
FBgn0001085	CG17697	fz	0.000902733	0.0983649	0.158	0.118	1
FBgn0261698	CG42732	SLO2	0.000933263	0.106015	0.249	0.192	1
FBgn0033192	CG2105	Corin	0.000973246	0.0551085	0.239	0.199	1
FBgn0026160	CG7958	tna	0.00104604	0.352298	0.455	0.363	1
FBgn0052406	CG32406	PVRAP	0.00132412	-0.0146622	0.096	0.104	1
FBgn0260941	CG42318	app	0.00143577	0.0879225	0.182	0.141	1
FBgn0263773	CG43690	fok	0.00147646	0.0604024	0.216	0.178	1
FBgn0040726	CG13439	dpr1	0.00164771	0.18343	0.394	0.332	1
FBgn0039054	CG13830	Cow	0.00182035	0.220567	0.411	0.324	1
FBgn0037015	CG13253	cmpy	0.00183105	0.0539482	0.202	0.173	1
FBgn0032797	CG10186	Hasp	0.00213603	-0.110579	0.762	0.827	1
FBgn0034731	CG10384	CG10384	0.00241601	0.0904033	0.199	0.154	1
FBgn0259243	CG42341	Pka-R1	0.00242468	0.0138105	0.192	0.173	1
FBgn0011656	CG1429	Mef2	0.00246102	0.0794089	0.228	0.186	1
FBgn0085383	CG34354	CG34354	0.00246921	0.0742277	0.23	0.202	1
FBgn0003360	CG16944	sesB	0.00269751	-0.0424731	0.813	0.826	1
FBgn0037171	CG14459	CG14459	0.00274401	0.036556	0.106	0.079	1
FBgn0000042	CG4027	Act5C	0.00308112	0.01541	0.486	0.46	1
FBgn0000064	CG6058	Ald1	0.00309381	-0.381103	0.592	0.696	1
FBgn0034753	CG2852	CG2852	0.00334378	-0.0866702	0.279	0.316	1
FBgn0267978	CG8376	ap	0.00343863	0.0281818	0.182	0.159	1
FBgn0085409	CG34380	smal	0.00353247	0.04139	0.146	0.119	1
FBgn0034808	CG9896	CG9896	0.00355621	0.139233	0.19	0.147	1
FBgn0036801	CG6896	MYPT-75D	0.00364496	0.0849194	0.153	0.111	1
FBgn0032151	CG4128	nAChRalpha6	0.00381445	0.98608	0.734	0.609	1
FBgn0010412	CG4464	RpS19a	0.00391356	0.064444	0.227	0.197	1
FBgn0051814	CG31814	DIP-kappa	0.0045849	0.108804	0.131	0.094	1
FBgn0013954	CG11001	Fkbp12	0.00459993	-0.103638	0.387	0.423	1
FBgn0085412	CG34383	kmr	0.00625861	0.0878453	0.249	0.204	1
FBgn0028644	CG4838	beat-Ic	0.00656381	0.547076	0.391	0.345	1
FBgn0263289	CG43398	scrib	0.00662874	0.040568	0.136	0.112	1
FBgn0031897	CG13784	CG13784	0.0069817	0.0115345	0.249	0.23	1
FBgn0085400	CG34371	side-V	0.00717351	0.0503101	0.147	0.115	1
FBgn0003380	CG12348	Sh	0.00718777	1.59509	0.939	0.918	1
FBgn0028370	CG4192	kek3	0.00754479	0.0532212	0.131	0.094	1
FBgn0267033	CG45477	mamo	0.00793625	0.928452	0.692	0.555	1
FBgn0024321	CG8524	NK7.1	0.00840837	0.0441141	0.136	0.105	1
FBgn0035041	CG13594	CG13594	0.00857223	0.0644708	0.111	0.081	1
FBgn0066084	CG30425	RpL41	0.00884055	1.38075	0.85	0.429	1
FBgn0085391	CG34362	trv	0.00891377	0.866566	0.615	0.427	1
FBgn0037521	CG2993	CG2993	0.0104275	0.113202	0.28	0.227	1
FBgn0052432	CG32432	CG32432	0.0104412	0.0592451	0.295	0.261	1
FBgn0029761	CG10706	SK	0.0105369	0.297979	0.433	0.33	1
FBgn0032666	CG5758	CG5758	0.0106177	0.0225971	0.134	0.116	1
FBgn0028645	CG7644	beat-Ib	0.0111885	0.146257	0.298	0.252	1
FBgn0004509	CG10772	Fur1	0.0119209	0.0412356	0.13	0.102	1
FBgn0004369	CG11516	Ptp99A	0.0123646	0.721609	0.66	0.489	1
FBgn0264273	CG33960	Sema2b	0.012524	0.0300869	0.114	0.101	1
FBgn0085385	CG34356	bma	0.0134144	0.0986231	0.108	0.078	1
FBgn0029897	CG3203	RpL17	0.0150795	-0.249684	0.615	0.711	1
FBgn0260793	CG42573	2mit	0.0153305	0.0486246	0.134	0.111	1
FBgn0052600	CG32600	dpr8	0.0155986	0.216048	0.367	0.291	1
FBgn0037913	CG6783	fabp	0.0174163	-0.0687053	0.113	0.14	1
FBgn0270928	CG32848	VAChT	0.0178066	0.121265	0.546	0.554	1
FBgn0259171	CG42276	Pde9	0.0186046	-0.0179145	0.492	0.478	1
FBgn0038839	CG10830	Ktl	0.0187179	0.0963411	0.246	0.199	1
FBgn0031770	CG13995	CG13995	0.019401	0.042755	0.121	0.091	1
FBgn0013973	CG1470	Gycbeta100B	0.0195667	0.0211223	0.126	0.113	1
FBgn0086680	CG10037	vvl	0.0198112	0.476525	0.203	0.169	1
FBgn0010114	CG2040	hig	0.0206506	0.19289	0.441	0.415	1
FBgn0261788	CG42734	Ank2	0.0214046	0.475827	0.709	0.576	1
FBgn0039349	CG4685	Ssadh	0.0219735	-0.0269029	0.1	0.118	1
FBgn0261928	CG42795	CG42795	0.0251023	0.0915517	0.205	0.16	1
FBgn0015399	CG12283	kek1	0.0253257	0.252245	0.426	0.352	1
FBgn0002945	CG11614	nkd	0.0255695	0.0832042	0.24	0.21	1
FBgn0260943	CG32169	Rbp6	0.0290432	0.813463	0.934	0.889	1
FBgn0264087	CG43756	Slob	0.0300624	0.0322472	0.21	0.186	1
FBgn0037676	CG8861	CG8861	0.0314037	0.25201	0.326	0.289	1
FBgn0036494	CG7250	Toll-6	0.0333709	0.0172142	0.187	0.166	1
FBgn0085395	CG34366	Shawl	0.0342698	0.00202973	0.127	0.132	1
FBgn0027598	CG31012	cindr	0.0354926	0.297237	0.512	0.442	1
FBgn0261556	CG42674	CG42674	0.0371966	-0.0794564	0.166	0.204	1
FBgn0004242	CG3139	Syt1	0.037641	0.703662	0.857	0.847	1
FBgn0052183	CG32183	Ccn	0.0381878	-0.0217573	0.127	0.138	1
FBgn0267001	CG42338	Ten-a	0.0388601	1.58811	0.879	0.762	1
FBgn0284243	CG9277	betaTub56D	0.0396571	-0.0418202	0.282	0.293	1
FBgn0264386	CG15899	Ca-alpha1T	0.0404898	0.938218	0.615	0.409	1
FBgn0267252	CG3694	Ggamma30A	0.0417918	0.00621087	0.979	0.987	1
FBgn0262782	CG5362	Mdh1	0.0478354	-0.0495148	0.117	0.15	1
FBgn0014859	CG1864	Hr38	0.0487064	-0.0656399	0.256	0.242	1
FBgn0030090	CG12664	fend	0.0498578	-0.0272441	0.218	0.245	1
FBgn0265182	CG44247	CG44247	0.0522912	0.0226565	0.113	0.094	1
FBgn0004611	CG4574	Plc21C	0.0549739	0.13596	0.334	0.278	1
FBgn0085434	CG34405	NaCP60E	0.0566729	0.641835	0.663	0.498	1
FBgn0259108	CG34387	futsch	0.0605758	0.318555	0.854	0.804	1
FBgn0000422	CG10697	Ddc	0.0611205	0.0953411	0.238	0.203	1
FBgn0261244	CG33174	inaE	0.0628441	0.156037	0.452	0.401	1
FBgn0036844	CG14080	Mkp3	0.0631825	0.292822	0.457	0.379	1
FBgn0031835	CG11319	CG11319	0.0641074	0.115078	0.225	0.182	1
FBgn0000179	CG3578	bi	0.0643988	0.114802	0.122	0.093	1
FBgn0263219	CG42330	Dscam4	0.0650201	0.076118	0.208	0.179	1
FBgn0015609	CG7100	CadN	0.0657856	0.264711	0.382	0.317	1
FBgn0033268	CG2297	Obp44a	0.0665959	0.0590136	0.167	0.194	1
FBgn0000633	CG17716	CG17716	0.0668817	0.337645	0.495	0.411	1
FBgn0000037	CG4356	mAChR-A	0.0718844	0.0659367	0.3	0.269	1
FBgn0261597	CG10305	RpS26	0.0721222	-0.173789	0.869	0.9	1
FBgn0030412	CG17762	Tomosyn	0.0740002	0.309434	0.603	0.46	1
FBgn0029123	CG18024	SoxN	0.0748164	0.368518	0.507	0.473	1
FBgn0042630	CG32139	Sox21b	0.0749914	0.0730645	0.106	0.08	1
FBgn0285952	CG3186	eEF5	0.0775347	-0.028351	0.236	0.255	1
FBgn0085414	CG34385	dpr12	0.0803694	0.0881421	0.337	0.298	1
FBgn0010411	CG8900	RpS18	0.080506	-0.609407	0.881	0.94	1
FBgn0034286	CG33996	dpr13	0.081769	0.229031	0.38	0.336	1
FBgn0000097	CG3166	aop	0.0822159	0.0484792	0.167	0.134	1
FBgn0033438	CG1794	Mmp2	0.0825705	-0.0416095	0.174	0.198	1
FBgn0010313	CG2530	corto	0.0830757	0.0610137	0.294	0.262	1
FBgn0037525	CG17816	CG17816	0.0844538	0.198629	0.447	0.389	1
FBgn0264001	CG43744	bru3	0.0896839	0.595982	0.481	0.34	1
FBgn0038498	CG14334	beat-IIa	0.0913372	0.144316	0.284	0.24	1
FBgn0014184	CG16747	Oda	0.0934568	0.263904	0.628	0.538	1
FBgn0016061	CG31062	side	0.0947267	0.0402208	0.334	0.313	1
FBgn0053179	CG33179	beat-IIIb	0.0955821	0.00537108	0.284	0.311	1
FBgn0266851	CR45312	lncRNA:CR45312	0.0970269	0.0186682	0.225	0.23	1
FBgn0003435	CG9218	sm	0.100366	0.774142	0.89	0.865	1
FBgn0039938	CG11153	Sox102F	0.102569	0.0456987	0.152	0.134	1
FBgn0030272	CG15201	CG15201	0.103777	0.0788065	0.138	0.111	1
FBgn0038237	CG8279	Pde6	0.103855	0.304039	0.378	0.314	1
FBgn0000575	CG1007	emc	0.109749	0.0848868	0.376	0.367	1
FBgn0019650	CG11186	toy	0.110509	0.0488768	0.301	0.281	1
FBgn0017590	CG6669	klg	0.111869	0.303528	0.438	0.426	1
FBgn0040532	CG8369	CG8369	0.113496	0.0502507	0.151	0.138	1
FBgn0052647	CG32647	CG32647	0.113557	0.0109499	0.249	0.248	1
FBgn0053143	CG33143	CG33143	0.113884	0.0383008	0.229	0.205	1
FBgn0024963	CG7535	GluClalpha	0.117119	0.339515	0.685	0.588	1
FBgn0052264	CG32264	CG32264	0.118078	0.44866	0.683	0.544	1
FBgn0031632	CG15628	CG15628	0.136832	-0.0467492	0.415	0.438	1
FBgn0263397	CG8585	Ih	0.137122	0.737547	0.894	0.784	1
FBgn0263392	CG43444	Tet	0.141128	0.145441	0.699	0.63	1
FBgn0263512	CG33980	Vsx2	0.142362	0.0336419	0.191	0.195	1
FBgn0264815	CG44007	Pde1c	0.146737	0.151473	0.316	0.272	1
FBgn0030432	CG4404	CG4404	0.147493	-0.00738598	0.106	0.113	1
FBgn0261871	CG33507	dpr2	0.151301	0.0168254	0.113	0.099	1
FBgn0262737	CG7437	mub	0.160253	1.24897	0.809	0.652	1
FBgn0264503	CG43902	CG43902	0.165057	0.182406	0.301	0.26	1
FBgn0053202	CG33202	dpr11	0.167062	0.0658328	0.206	0.18	1
FBgn0261836	CG42768	Msp300	0.169044	0.459198	0.674	0.584	1
FBgn0000636	CG5803	Fas3	0.17353	0.0686222	0.235	0.213	1
FBgn0250908	CG42242	beat-VII	0.179028	0.0634974	0.175	0.148	1
FBgn0033405	CG13954	CG13954	0.185376	0.00654619	0.2	0.194	1
FBgn0003429	CG10693	slo	0.19672	0.517594	0.635	0.48	1
FBgn0259242	CG42340	CG42340	0.198192	0.00994392	0.246	0.233	1
FBgn0038063	CG33976	Octbeta2R	0.206388	0.288065	0.415	0.34	1
FBgn0038282	CG33485	dpr9	0.20751	0.0688329	0.359	0.333	1
FBgn0029814	CG15765	CG15765	0.207562	0.146553	0.39	0.382	1
FBgn0000108	CG7727	Appl	0.211925	0.824529	0.851	0.803	1
FBgn0085407	CG34378	Pvf3	0.2124	0.583166	0.493	0.418	1
FBgn0041605	CG32490	cpx	0.21326	0.128357	0.986	0.994	1
FBgn0011224	CG31000	heph	0.213725	0.705419	0.596	0.422	1
FBgn0261588	CG42698	pdm3	0.222682	0.0582807	0.104	0.083	1
FBgn0262738	CG3620	norpA	0.223792	0.00799134	0.382	0.385	1
FBgn0261549	CG42667	rdgA	0.22819	0.222983	0.294	0.252	1
FBgn0010473	CG15427	tutl	0.23004	0.337351	0.579	0.473	1
FBgn0000635	CG3665	Fas2	0.230801	0.0277011	0.132	0.123	1
FBgn0262614	CG43140	pyd	0.246915	0.189647	0.192	0.17	1
FBgn0000116	CG32031	Argk	0.247905	0.301902	0.781	0.764	1
FBgn0013981	CG3379	His4r	0.254526	0.0923766	0.959	0.958	1
FBgn0267253	CG32700	CG32700	0.261244	0.0336004	0.238	0.234	1
FBgn0010113	CG15532	hdc	0.264056	0.363753	0.342	0.194	1
FBgn0035495	CG14989	CG14989	0.274122	0.245915	0.547	0.47	1
FBgn0260964	CG33528	Vmat	0.275664	0.268845	0.109	0.107	1
FBgn0033108	CG15236	CG15236	0.277451	0.0283065	0.172	0.166	1
FBgn0000036	CG5610	nAChRalpha1	0.279578	0.161429	0.324	0.282	1
FBgn0039647	CG14509	jus	0.280447	0.157497	0.421	0.387	1
FBgn0028704	CG18660	Nckx30C	0.281679	0.479548	0.786	0.779	1
FBgn0051361	CG31361	dpr17	0.287057	-0.00568563	0.115	0.111	1
FBgn0032840	CG13968	sNPF	0.287412	0.446301	0.236	0.209	1
FBgn0261258	CG6014	rgn	0.289044	-0.0119618	0.149	0.172	1
FBgn0265296	CG42256	Dscam2	0.289343	0.329799	0.677	0.635	1
FBgn0032400	CG6770	CG6770	0.289452	0.330841	0.696	0.591	1
FBgn0004244	CG10537	Rdl	0.28974	0.714822	0.956	0.962	1
FBgn0004595	CG17228	pros	0.293383	1.43392	0.926	0.885	1
FBgn0264895	CG44086	RapGAP1	0.294859	0.255459	0.463	0.403	1
FBgn0034725	CG6044	CG6044	0.296703	0.00790528	0.317	0.294	1
FBgn0004880	CG1130	scrt	0.306148	0.288047	0.938	0.938	1
FBgn0031424	CG9887	VGlut	0.306347	0.110523	0.187	0.153	1
FBgn0260660	CG42543	Mp	0.308912	0.0628565	0.269	0.248	1
FBgn0028875	CG32975	nAChRalpha5	0.311726	0.848794	0.74	0.611	1
FBgn0013576	CG32464	mtd	0.324488	0.471014	0.639	0.489	1
FBgn0030174	CG15312	CG15312	0.331543	-0.00799727	0.115	0.13	1
FBgn0085432	CG34403	pan	0.334592	1.22756	0.778	0.613	1
FBgn0053147	CG33147	Hs3st-A	0.338434	0.343556	0.709	0.606	1
FBgn0036043	CG8177	CG8177	0.345844	0.082866	0.238	0.213	1
FBgn0031414	CG33955	eys	0.34673	0.155016	0.348	0.316	1
FBgn0013433	CG4846	beat-Ia	0.356299	-0.0205377	0.11	0.126	1
FBgn0267336	CG34360	Glut4EF	0.356641	1.10878	0.903	0.872	1
FBgn0000411	CG5893	D	0.365127	0.0305973	0.106	0.091	1
FBgn0086758	CG31666	chinmo	0.368083	0.567922	0.686	0.576	1
FBgn0027608	CG2082	CG2082	0.373068	-0.0227752	0.375	0.385	1
FBgn0000273	CG4379	Pka-C1	0.377661	0.459969	0.622	0.482	1
FBgn0001233	CG1242	Hsp83	0.385825	0.074655	0.536	0.494	1
FBgn0003274	CG4918	RpLP2	0.389903	0.048224	0.534	0.491	1
FBgn0001234	CR31400	lncRNA:Hsromega	0.39039	3.70548	0.987	0.982	1
FBgn0000024	CG17907	Ace	0.392791	0.511211	0.613	0.536	1
FBgn0260658	CG42541	CG42541	0.40345	-0.405724	0.616	0.684	1
FBgn0041707	CG1168	7B2	0.405436	-0.181762	0.656	0.726	1
FBgn0262869	CG43224	Gfrl	0.419305	0.292317	0.475	0.418	1
FBgn0086778	CG32538	nAChRalpha7	0.421526	0.289792	0.448	0.334	1
FBgn0038653	CG18208	Octalpha2R	0.424292	0.0400398	0.23	0.226	1
FBgn0285944	CG9907	para	0.428221	1.3651	0.881	0.799	1
FBgn0263220	CG43388	Hk	0.430936	0.536571	0.743	0.669	1
FBgn0010452	CG11280	trn	0.450331	0.0450043	0.141	0.126	1
FBgn0264442	CG43860	ab	0.453016	-0.0021692	0.132	0.123	1
FBgn0041094	CG7590	scyl	0.453067	0.38427	0.495	0.434	1
FBgn0052017	CG32017	CG32017	0.461375	0.283053	0.412	0.287	1
FBgn0259216	CG42316	RhoGAP102A	0.465151	-0.00542746	0.094	0.106	1
FBgn0050089	CG30089	CG30089	0.467739	0.0210392	0.116	0.1	1
FBgn0264006	CG43749	dysc	0.470126	0.63855	0.804	0.738	1
FBgn0031374	CG7337	Wdr62	0.474598	0.0709991	0.381	0.354	1
FBgn0264339	CG43795	CG43795	0.47616	0.0360218	0.143	0.13	1
FBgn0266801	CG45263	CG45263	0.482574	0.0074661	0.4	0.395	1
FBgn0027589	CG1688	CG1688	0.497421	0.00804178	0.143	0.138	1
FBgn0083949	CG34113	side-III	0.501548	0.272139	0.551	0.505	1
FBgn0003165	CG9755	pum	0.506591	1.40091	0.776	0.526	1
FBgn0002593	CG4087	RpLP1	0.509139	-0.336562	0.739	0.836	1
FBgn0263980	CG43729	Stacl	0.513706	0.111905	0.556	0.505	1
FBgn0034138	CG8332	RpS15	0.515714	-0.362174	0.885	0.916	1
FBgn0044328	CG32052	CG32052	0.521507	-0.029173	0.11	0.123	1
FBgn0039380	CG5890	CG5890	0.536684	0.0545892	0.283	0.264	1
FBgn0033544	CG7220	CG7220	0.536802	-0.00668269	0.163	0.167	1
FBgn0265002	CG44153	CG44153	0.557384	0.00993205	0.226	0.224	1
FBgn0263930	CG4974	dally	0.578761	0.0418796	0.189	0.174	1
FBgn0038826	CG17838	Syp	0.580839	0.343512	0.511	0.396	1
FBgn0034978	CG3257	CG3257	0.582314	0.0208107	0.124	0.115	1
FBgn0085387	CG34358	shakB	0.596967	0.098362	0.269	0.238	1
FBgn0000303	CG12345	ChAT	0.599717	0.0223419	0.338	0.316	1
FBgn0015400	CG4977	kek2	0.616835	0.105484	0.331	0.306	1
FBgn0053517	CG33517	Dop2R	0.641442	0.142642	0.783	0.776	1
FBgn0020907	CG14904	Scp2	0.643464	0.0297813	0.146	0.133	1
FBgn0033484	CG2269	CG2269	0.657669	-0.033179	0.562	0.609	1
FBgn0039584	CG14064	beat-VI	0.658384	0.0702365	0.258	0.25	1
FBgn0013467	CG18285	igl	0.660679	0.537526	0.562	0.382	1
FBgn0285948	CG15442	RpL27A	0.661869	0.353266	0.797	0.748	1
FBgn0265598	CG44425	Bx	0.678069	0.045301	0.117	0.104	1
FBgn0263353	CG11000	CG11000	0.716323	0.0511143	0.451	0.428	1
FBgn0250839	CG2016	CG2016	0.744187	-0.0223627	0.131	0.136	1
FBgn0261509	CG14351	haf	0.774454	-0.00103267	0.105	0.112	1
FBgn0261804	CG42750	CG42750	0.777646	0.065996	0.355	0.326	1
FBgn0033446	CG1648	CG1648	0.78195	0.0134218	0.115	0.109	1
FBgn0265597	CG44424	rad	0.788747	0.226864	0.351	0.294	1
FBgn0265487	CG33197	mbl	0.80253	0.135951	0.305	0.267	1
FBgn0037874	CG4800	Tctp	0.806747	0.036194	0.385	0.376	1
FBgn0028496	CG30116	CG30116	0.813063	0.0403662	0.463	0.454	1
FBgn0263995	CG43738	cpo	0.813711	0.562907	0.797	0.754	1
FBgn0040823	CG14162	dpr6	0.815849	0.08405	0.356	0.345	1
FBgn0032901	CG9339	sky	0.818679	0.142417	0.473	0.432	1
FBgn0051774	CG31774	fred	0.825812	0.132087	0.274	0.262	1
FBgn0036165	CG7533	chrb	0.844048	0.432544	0.592	0.433	1
FBgn0003423	CG1417	slgA	0.846381	0.213695	0.4	0.305	1
FBgn0086677	CG30040	jeb	0.864111	0.133603	0.248	0.224	1
FBgn0027654	CG2239	jdp	0.870778	0.0372711	0.617	0.59	1
FBgn0052062	CG32062	Rbfox1	0.873946	0.856402	0.906	0.837	1
FBgn0023534	CG17778	CG17778	0.874251	0.0336419	0.167	0.158	1
FBgn0259213	CG42313	side-II	0.896048	-0.020511	0.3	0.294	1
FBgn0010415	CG10497	Sdc	0.898864	0.210481	0.669	0.574	1
FBgn0031294	CG31795	IA-2	0.903366	2.1355	0.986	0.955	1
FBgn0030897	CG5744	Frq1	0.90832	0.858669	0.73	0.548	1
FBgn0033250	CG14762	CG14762	0.919404	0.0551203	0.429	0.414	1
FBgn0004580	CG6702	Cbp53E	0.924262	0.627769	0.659	0.536	1
FBgn0264606	CG43955	Fife	0.947346	0.114276	0.351	0.315	1
FBgn0053543	CG33543	CG33543	0.966619	0.0413158	0.243	0.24	1
FBgn0001235	CG17117	hth	0.978248	0.289412	0.354	0.23	1
FBgn0260657	CG42540	CG42540	0.984637	0.534808	0.739	0.628	1
FBgn0036927	CG7433	Gabat	0.993867	-0.00447194	0.182	0.183	1
FBgn0005775	CG7503	Con	0.998752	0.409217	0.43	0.33	1

## Sheet: Female_C5
FlyBaseID	GeneID	Gene symbol	p_val	avg_diff	pct.1	pct.2	p_val_adj
FBgn0019660	CR32665	lncRNA:roX2	5.05768e-186	-1.75914	0.005	0.671	7.58652e-183
FBgn0013688	CR34096	mt:srRNA	2.9172e-54	0.117843	0.131	0.028	4.3758e-51
FBgn0085753	CR40596	28SrRNA-Psi:CR40596	1.31054e-36	0.121833	0.115	0.022	1.96581e-33
FBgn0002940	CG4550	ninaE	5.37675e-18	-0.165578	0.047	0.14	8.06513e-15
FBgn0004595	CG17228	pros	2.34256e-16	5.89606	0.997	0.991	3.51384e-13
FBgn0000121	CG5962	Arr2	8.51778e-14	-0.0771684	0.053	0.113	1.27767e-10
FBgn0052683	CG32683	CG32683	9.9099e-12	0.212123	0.265	0.155	1.48649e-08
FBgn0036789	CG13702	AstC-R2	3.29546e-11	0.116189	0.154	0.085	4.94318e-08
FBgn0065099	CR33925	snRNA:7SK	1.16368e-10	2.2787	0.692	0.493	1.74551e-07
FBgn0003301	CG9533	rut	1.88662e-10	0.114041	0.25	0.168	2.82992e-07
FBgn0038641	CG7708	ChT	2.80872e-10	0.180179	0.326	0.212	4.21308e-07
FBgn0260971	CG42594	CG42594	3.13504e-10	0.205515	0.33	0.202	4.70256e-07
FBgn0058469	CR40469	lncRNA:CR40469	4.30828e-10	0.0538221	0.12	0.079	6.46242e-07
FBgn0052057	CG32057	dpr10	7.91358e-10	0.118385	0.202	0.123	1.18704e-06
FBgn0050361	CG30361	mtt	3.48621e-09	0.0912726	0.144	0.084	5.22932e-06
FBgn0261260	CG42611	mgl	5.58528e-09	0.134288	0.226	0.138	8.37792e-06
FBgn0013995	CG5685	Calx	7.74664e-09	0.131251	0.274	0.195	1.162e-05
FBgn0052982	CG32982	CG32982	3.47017e-08	0.098147	0.169	0.096	5.20525e-05
FBgn0031294	CG31795	IA-2	4.04933e-08	4.91254	0.998	0.998	6.07399e-05
FBgn0264794	CR44024	lncRNA:CR44024	5.38439e-08	0.199457	0.436	0.352	8.07658e-05
FBgn0004619	CG8442	GluRIA	6.3913e-08	0.11943	0.274	0.206	9.58695e-05
FBgn0033987	CG12424	ckn	7.03317e-08	0.0523123	0.152	0.109	0.000105498
FBgn0038246	CG14853	CG14853	9.1769e-08	0.0749066	0.177	0.112	0.000137654
FBgn0052206	CG32206	CG32206	1.35281e-07	0.132071	0.326	0.244	0.000202922
FBgn0283651	CG46301	CG46301	1.56203e-07	0.255127	0.372	0.273	0.000234305
FBgn0028888	CG4168	CG4168	2.09063e-07	0.0851521	0.159	0.089	0.000313594
FBgn0085399	CG34370	CG34370	2.90411e-07	0.0677638	0.15	0.096	0.000435617
FBgn0013718	CG33991	nuf	3.16793e-07	0.0427641	0.111	0.07	0.00047519
FBgn0001234	CR31400	lncRNA:Hsromega	5.98431e-07	5.58234	0.997	0.997	0.000897646
FBgn0259170	CG42275	alpha-Man-Ia	7.0484e-07	0.100828	0.217	0.144	0.00105726
FBgn0052521	CG32521	CG32521	7.05563e-07	0.0640337	0.126	0.079	0.00105834
FBgn0033368	CG13743	CG13743	1.21939e-06	0.0960571	0.239	0.169	0.00182909
FBgn0023095	CG11282	caps	1.46846e-06	0.0507099	0.175	0.131	0.00220269
FBgn0029768	CG16752	SPR	2.12874e-06	0.076868	0.156	0.115	0.00319311
FBgn0262473	CG5490	Tl	2.14425e-06	0.080959	0.19	0.129	0.00321638
FBgn0026411	CG11354	Lim1	2.4831e-06	0.388707	0.33	0.237	0.00372464
FBgn0004652	CG14307	fru	5.40064e-06	0.556409	0.309	0.168	0.00810095
FBgn0267001	CG42338	Ten-a	5.49163e-06	1.97191	0.908	0.782	0.00823745
FBgn0042696	CG2380	NfI	5.75853e-06	0.127238	0.226	0.137	0.0086378
FBgn0004573	CG12073	5-HT7	7.20515e-06	0.056496	0.142	0.098	0.0108077
FBgn0265194	CG44240	Trpm	8.14732e-06	0.0664221	0.154	0.105	0.012221
FBgn0004395	CG4620	unk	8.39445e-06	0.104693	0.231	0.171	0.0125917
FBgn0085426	CG34397	Rgk3	9.99214e-06	0.0689051	0.11	0.058	0.0149882
FBgn0260442	CG6831	rhea	1.11062e-05	0.0676712	0.169	0.119	0.0166593
FBgn0264753	CG44011	Rgk1	1.17897e-05	0.0544835	0.144	0.107	0.0176846
FBgn0259677	CG42346	CG42346	1.42064e-05	0.0789296	0.192	0.143	0.0213097
FBgn0004168	CG16720	5-HT1A	1.79114e-05	0.0885515	0.264	0.206	0.0268672
FBgn0262614	CG43140	pyd	1.96736e-05	0.0812406	0.263	0.211	0.0295105
FBgn0265052	CG44167	St3	2.16786e-05	0.0356534	0.144	0.117	0.0325179
FBgn0004882	CG10868	orb	2.17958e-05	0.0677902	0.109	0.058	0.0326937
FBgn0261090	CG42333	Sytbeta	2.28554e-05	0.0440433	0.217	0.187	0.0342831
FBgn0001229	CG4190	Hsp67Bc	2.47004e-05	-0.183887	0.211	0.298	0.0370506
FBgn0265595	CG44422	CG44422	3.53489e-05	0.214988	0.324	0.212	0.0530234
FBgn0267322	CR45758	lncRNA:CR45758	4.26679e-05	0.105405	0.229	0.168	0.0640019
FBgn0051324	CG31324	CG31324	5.17609e-05	0.0863841	0.172	0.103	0.0776414
FBgn0013686	CR34094	mt:lrRNA	7.49389e-05	7.80107	0.867	0.55	0.112408
FBgn0034897	CG11299	Sesn	7.73821e-05	0.0599502	0.123	0.089	0.116073
FBgn0014859	CG1864	Hr38	8.82929e-05	-0.48931	0.314	0.392	0.132439
FBgn0025382	CG14791	Rab27	9.07446e-05	-0.0448332	0.129	0.172	0.136117
FBgn0039349	CG4685	Ssadh	0.000107257	-0.0551449	0.106	0.153	0.160886
FBgn0031299	CG4629	CG4629	0.000132843	0.0501997	0.14	0.098	0.199264
FBgn0002543	CG5481	robo2	0.0001496	0.198399	0.187	0.127	0.2244
FBgn0053087	CG33087	LRP1	0.00019801	0.0348824	0.128	0.099	0.297014
FBgn0001225	CG4183	Hsp26	0.00025762	-0.218815	0.152	0.219	0.386429
FBgn0024189	CG33141	sns	0.000283033	0.0488146	0.187	0.149	0.42455
FBgn0039346	CG5079	CG5079	0.000328994	-0.0559763	0.149	0.196	0.493491
FBgn0264442	CG43860	ab	0.000340433	-0.148985	0.255	0.298	0.51065
FBgn0264308	CG43778	CG43778	0.000384341	0.166604	0.341	0.256	0.576511
FBgn0036934	CG7395	sNPF-R	0.000424643	0.0746307	0.118	0.073	0.636965
FBgn0027356	CG8604	Amph	0.000426282	0.0321576	0.131	0.105	0.639423
FBgn0267910	CR34335	lncRNA:CR34335	0.000465068	3.54987	0.969	0.851	0.697603
FBgn0260429	CG42524	CG42524	0.000485761	0.0410861	0.142	0.109	0.728642
FBgn0040397	CG3655	CG3655	0.000510335	-0.00530417	0.174	0.176	0.765503
FBgn0040877	CG12994	CG12994	0.000540443	0.0560443	0.101	0.063	0.810664
FBgn0267431	CG45784	Myo81F	0.000593243	0.0706398	0.131	0.088	0.889865
FBgn0004910	CG15855	Eip63F-1	0.00059892	0.0717471	0.11	0.065	0.89838
FBgn0264090	CG43759	CG43759	0.000654754	0.111448	0.265	0.206	0.982131
FBgn0284245	CG8280	eEF1alpha1	0.000780903	-0.00257178	0.197	0.218	1
FBgn0029824	CG3726	CG3726	0.000781819	0.0717452	0.166	0.122	1
FBgn0027339	CG11352	jim	0.000893059	2.48067	0.988	0.985	1
FBgn0029761	CG10706	SK	0.000926212	0.52348	0.679	0.549	1
FBgn0024944	CG3856	Oamb	0.000926556	0.0366266	0.117	0.09	1
FBgn0266377	CG45019	Pde8	0.000989635	0.0657343	0.168	0.122	1
FBgn0264339	CG43795	CG43795	0.00101741	-0.0582609	0.21	0.256	1
FBgn0028481	CG4341	CG4341	0.00114952	0.0785006	0.231	0.184	1
FBgn0041605	CG32490	cpx	0.00128259	0.216522	0.9	0.902	1
FBgn0259234	CG42332	Camta	0.00132788	0.00122637	0.205	0.207	1
FBgn0001226	CG4466	Hsp27	0.0015154	-0.186417	0.138	0.195	1
FBgn0027654	CG2239	jdp	0.00161162	-0.544763	0.796	0.812	1
FBgn0020269	CG10145	mspo	0.00172474	0.0499031	0.227	0.192	1
FBgn0085410	CG34381	TrissinR	0.00181351	0.0689467	0.115	0.071	1
FBgn0031530	CG3254	Pgant2	0.00185915	0.073187	0.187	0.133	1
FBgn0250869	CG42240	CG42240	0.00189816	0.0365264	0.109	0.074	1
FBgn0000547	CG12676	ed	0.00206354	0.109277	0.275	0.209	1
FBgn0267579	CR45919	lncRNA:CR45919	0.00224673	0.0203021	0.141	0.118	1
FBgn0085385	CG34356	bma	0.00226737	0.236027	0.382	0.313	1
FBgn0264001	CG43744	bru3	0.00259846	1.4876	0.865	0.796	1
FBgn0011666	CG5099	msi	0.0027488	0.375827	0.511	0.34	1
FBgn0031306	CG4577	CG4577	0.00280181	0.21677	0.34	0.25	1
FBgn0000108	CG7727	Appl	0.00282542	1.00129	0.902	0.835	1
FBgn0083228	CG5907	Frq2	0.0028547	0.243448	0.421	0.326	1
FBgn0019985	CG11144	mGluR	0.0031138	0.190017	0.376	0.302	1
FBgn0066084	CG30425	RpL41	0.00328851	1.13121	0.809	0.481	1
FBgn0266851	CR45312	lncRNA:CR45312	0.00419145	-0.100983	0.176	0.239	1
FBgn0037913	CG6783	fabp	0.0046885	-0.0374637	0.117	0.153	1
FBgn0085390	CG34361	Dgk	0.0049682	0.0364168	0.118	0.092	1
FBgn0033446	CG1648	CG1648	0.00540492	-0.0631966	0.198	0.239	1
FBgn0263706	CG43658	CG43658	0.00555492	0.0986572	0.183	0.128	1
FBgn0003326	CG17579	sca	0.00577785	0.0388053	0.147	0.111	1
FBgn0085420	CG34391	DIP-delta	0.00588854	0.0948062	0.247	0.197	1
FBgn0052066	CG32066	CG32066	0.00622802	-0.00479964	0.145	0.146	1
FBgn0260003	CG34157	Dys	0.00622859	0.0307215	0.199	0.185	1
FBgn0283499	CG18402	InR	0.00679988	0.0685064	0.252	0.213	1
FBgn0033544	CG7220	CG7220	0.00754841	-0.0120955	0.204	0.214	1
FBgn0031971	CG7224	Sirup	0.00762834	-0.0308311	0.109	0.136	1
FBgn0015519	CG2302	nAChRalpha3	0.00764363	0.185317	0.319	0.23	1
FBgn0014163	CG4609	fax	0.00787411	0.762945	0.758	0.596	1
FBgn0010434	CG11949	cora	0.00791087	-0.0226585	0.174	0.196	1
FBgn0261698	CG42732	SLO2	0.0084179	0.0955016	0.29	0.218	1
FBgn0259212	CG42312	cno	0.00877027	0.0545421	0.136	0.107	1
FBgn0001186	CG3001	Hex-A	0.00883224	0.255628	0.454	0.345	1
FBgn0004880	CG1130	scrt	0.00889009	0.00953315	0.858	0.889	1
FBgn0285952	CG3186	eEF5	0.00892621	-0.0253115	0.27	0.304	1
FBgn0085380	CG34351	CG34351	0.00955588	0.0562201	0.112	0.075	1
FBgn0264386	CG15899	Ca-alpha1T	0.00972315	1.23517	0.745	0.633	1
FBgn0034725	CG6044	CG6044	0.00973719	-0.0991599	0.282	0.354	1
FBgn0028704	CG18660	Nckx30C	0.00980277	0.220309	0.713	0.692	1
FBgn0013954	CG11001	Fkbp12	0.0100916	-0.293576	0.426	0.525	1
FBgn0051690	CG31690	CG31690	0.010547	0.0642321	0.214	0.171	1
FBgn0051814	CG31814	DIP-kappa	0.0108768	0.0416549	0.168	0.141	1
FBgn0051163	CG31163	SKIP	0.0108792	0.157638	0.404	0.338	1
FBgn0003435	CG9218	sm	0.0115106	1.24572	0.947	0.94	1
FBgn0265296	CG42256	Dscam2	0.0120057	-0.0412902	0.825	0.85	1
FBgn0086680	CG10037	vvl	0.0121173	0.103929	0.174	0.131	1
FBgn0005636	CG3385	nvy	0.0124387	-0.0300696	0.145	0.167	1
FBgn0001091	CG12055	Gapdh1	0.0128873	-0.130571	0.206	0.287	1
FBgn0024321	CG8524	NK7.1	0.0144983	-0.0305741	0.192	0.217	1
FBgn0003274	CG4918	RpLP2	0.0155677	-0.173876	0.563	0.628	1
FBgn0033403	CG13739	CG13739	0.0159048	0.1463	0.263	0.185	1
FBgn0034978	CG3257	CG3257	0.017489	-0.0350431	0.206	0.239	1
FBgn0019643	CG3318	AANAT1	0.0178538	-0.0380173	0.126	0.156	1
FBgn0002945	CG11614	nkd	0.018887	0.036226	0.3	0.276	1
FBgn0010415	CG10497	Sdc	0.0189698	0.136482	0.678	0.649	1
FBgn0052698	CG32698	CARPB	0.019218	0.0404304	0.141	0.124	1
FBgn0004244	CG10537	Rdl	0.0192384	0.638143	0.967	0.972	1
FBgn0015777	CG9261	nrv2	0.0197215	0.0374977	0.144	0.12	1
FBgn0261649	CG31247	tinc	0.0201441	0.064217	0.153	0.117	1
FBgn0037475	CG33323	Fer1	0.020155	-0.0559952	0.119	0.111	1
FBgn0261113	CG17836	Xrp1	0.0203358	-0.027632	0.21	0.238	1
FBgn0019662	CG8593	qm	0.0212636	0.0244442	0.133	0.113	1
FBgn0052204	CG32204	CG32204	0.0222191	0.0762652	0.124	0.091	1
FBgn0263873	CG43720	sick	0.0231959	0.02924	0.127	0.106	1
FBgn0038156	CG14372	side-IV	0.0233696	0.0457062	0.126	0.091	1
FBgn0038826	CG17838	Syp	0.0254891	0.133116	0.496	0.478	1
FBgn0038839	CG10830	Ktl	0.0256317	-0.036483	0.344	0.38	1
FBgn0267033	CG45477	mamo	0.0265952	0.480883	0.334	0.221	1
FBgn0040765	CG33473	luna	0.0266713	0.116902	0.349	0.302	1
FBgn0003380	CG12348	Sh	0.027696	2.05879	0.976	0.962	1
FBgn0031738	CG9171	CG9171	0.028853	0.0290133	0.133	0.12	1
FBgn0036144	CG6207	GlcAT-P	0.0289866	0.0844775	0.255	0.203	1
FBgn0262508	CG43078	CG43078	0.0293911	-0.0159239	0.088	0.101	1
FBgn0030913	CG6123	CG6123	0.0295796	0.15665	0.363	0.293	1
FBgn0086778	CG32538	nAChRalpha7	0.0314983	0.277705	0.54	0.442	1
FBgn0033159	CG17800	Dscam1	0.0322498	0.0961894	0.288	0.222	1
FBgn0036454	CG17839	CG17839	0.0333832	0.0412448	0.159	0.123	1
FBgn0083975	CG34139	Nlg4	0.0336487	0.0603659	0.248	0.199	1
FBgn0030090	CG12664	fend	0.0339298	0.00932907	0.476	0.49	1
FBgn0026160	CG7958	tna	0.0342815	0.123861	0.362	0.307	1
FBgn0267252	CG3694	Ggamma30A	0.0342819	-0.556182	0.935	0.946	1
FBgn0010300	CG10719	brat	0.0375102	0.317077	0.549	0.464	1
FBgn0051191	CG31191	CG31191	0.0383594	0.0434009	0.114	0.086	1
FBgn0085400	CG34371	side-V	0.0384553	0.0192515	0.201	0.21	1
FBgn0262160	CG9932	CG9932	0.0388664	0.0381742	0.22	0.183	1
FBgn0037874	CG4800	Tctp	0.0406501	-0.0258066	0.273	0.301	1
FBgn0020907	CG14904	Scp2	0.0414921	-0.103844	0.174	0.193	1
FBgn0261928	CG42795	CG42795	0.0418693	0.0616981	0.265	0.218	1
FBgn0025525	CG9102	bab2	0.0425186	0.06752	0.145	0.105	1
FBgn0031897	CG13784	CG13784	0.0425501	-0.0295291	0.272	0.299	1
FBgn0243512	CG7850	puc	0.0434607	-0.0247692	0.093	0.122	1
FBgn0265597	CG44424	rad	0.0442908	0.655956	0.681	0.646	1
FBgn0262782	CG5362	Mdh1	0.0453282	-0.0260938	0.095	0.117	1
FBgn0004449	CG5723	Ten-m	0.0459889	0.155467	0.392	0.326	1
FBgn0051221	CG31221	CG31221	0.0466565	3.10967	0.956	0.916	1
FBgn0010114	CG2040	hig	0.0482476	0.0616886	0.543	0.506	1
FBgn0000037	CG4356	mAChR-A	0.048938	-0.0264774	0.454	0.468	1
FBgn0000097	CG3166	aop	0.0491852	-0.00330117	0.192	0.208	1
FBgn0031835	CG11319	CG11319	0.0508026	0.218733	0.43	0.398	1
FBgn0085397	CG34368	Fili	0.0508392	0.0392834	0.14	0.109	1
FBgn0032797	CG10186	Hasp	0.0519498	-0.508445	0.743	0.802	1
FBgn0015774	CG10521	NetB	0.0542584	0.219814	0.34	0.267	1
FBgn0039209	CG13624	REPTOR	0.0542994	0.0979259	0.251	0.198	1
FBgn0261262	CG42613	CG42613	0.0554833	0.331024	0.492	0.342	1
FBgn0004611	CG4574	Plc21C	0.056153	-0.0596554	0.496	0.522	1
FBgn0259242	CG42340	CG42340	0.0562019	0.00839938	0.276	0.295	1
FBgn0263397	CG8585	Ih	0.0578258	0.262454	0.814	0.75	1
FBgn0285944	CG9907	para	0.0600313	1.27653	0.891	0.79	1
FBgn0085387	CG34358	shakB	0.0601873	0.30654	0.578	0.512	1
FBgn0002868	CG9470	MtnA	0.0625566	0.149823	0.236	0.163	1
FBgn0041097	CG5423	robo3	0.0628226	0.0251131	0.183	0.173	1
FBgn0035173	CG13907	CG13907	0.0660671	0.0335333	0.106	0.079	1
FBgn0010313	CG2530	corto	0.0662382	0.0473653	0.357	0.349	1
FBgn0051619	CG31619	nolo	0.067849	0.0914351	0.278	0.236	1
FBgn0000064	CG6058	Ald1	0.0687911	-0.257512	0.505	0.575	1
FBgn0031414	CG33955	eys	0.0694153	-0.0984626	0.349	0.369	1
FBgn0038087	CG10134	beat-Va	0.0697345	0.0341852	0.168	0.146	1
FBgn0043364	CG4427	cbt	0.0710632	0.0156404	0.142	0.14	1
FBgn0037963	CG6977	Cad87A	0.0714189	0.0346481	0.106	0.084	1
FBgn0003360	CG16944	sesB	0.0746182	0.0640469	0.762	0.755	1
FBgn0037941	CG12594	CG12594	0.0747719	0.08375	0.177	0.145	1
FBgn0040823	CG14162	dpr6	0.0748427	-0.0278115	0.274	0.294	1
FBgn0000636	CG5803	Fas3	0.0757076	-0.0249355	0.248	0.254	1
FBgn0000635	CG3665	Fas2	0.0758788	0.0875935	0.291	0.242	1
FBgn0011676	CG6713	Nos	0.0764823	0.00756605	0.112	0.111	1
FBgn0031736	CG11030	CG11030	0.0764939	0.154318	0.393	0.355	1
FBgn0259245	CG42343	DIP-beta	0.0774403	0.0523426	0.174	0.159	1
FBgn0000024	CG17907	Ace	0.0816854	0.468388	0.697	0.614	1
FBgn0037171	CG14459	CG14459	0.0822466	0.049168	0.104	0.078	1
FBgn0037956	CG6959	CG6959	0.0822765	0.0219631	0.111	0.094	1
FBgn0038282	CG33485	dpr9	0.082936	0.0240379	0.513	0.533	1
FBgn0030897	CG5744	Frq1	0.0836287	0.470518	0.553	0.418	1
FBgn0013433	CG4846	beat-Ia	0.0844783	-0.0674577	0.203	0.24	1
FBgn0004885	CG6863	tok	0.0859049	-0.00749047	0.123	0.132	1
FBgn0052677	CG32677	X11Lbeta	0.0869379	0.170306	0.429	0.349	1
FBgn0014184	CG16747	Oda	0.0893202	0.0733382	0.669	0.634	1
FBgn0051092	CG31092	LpR2	0.0894769	0.0360389	0.141	0.117	1
FBgn0040532	CG8369	CG8369	0.0910998	0.000925915	0.132	0.134	1
FBgn0261588	CG42698	pdm3	0.0911306	0.131822	0.32	0.275	1
FBgn0085382	CG34353	CG34353	0.0924166	0.0567605	0.234	0.207	1
FBgn0034753	CG2852	CG2852	0.0957622	-0.200124	0.386	0.48	1
FBgn0028644	CG4838	beat-Ic	0.0968295	0.222923	0.359	0.307	1
FBgn0000422	CG10697	Ddc	0.0972462	0.0474409	0.596	0.613	1
FBgn0050089	CG30089	CG30089	0.0974268	-0.0301943	0.113	0.145	1
FBgn0001224	CG4463	Hsp23	0.10156	-0.151448	0.156	0.188	1
FBgn0052647	CG32647	CG32647	0.104166	0.0583289	0.228	0.197	1
FBgn0261046	CG31190	Dscam3	0.104715	0.0433876	0.235	0.208	1
FBgn0031697	CG14024	CG14024	0.105322	-0.021211	0.242	0.273	1
FBgn0032151	CG4128	nAChRalpha6	0.111474	0.730065	0.84	0.788	1
FBgn0262738	CG3620	norpA	0.111607	0.0487391	0.497	0.506	1
FBgn0001235	CG17117	hth	0.112298	0.134059	0.518	0.459	1
FBgn0266418	CG45058	wake	0.117222	0.0159163	0.161	0.16	1
FBgn0037676	CG8861	CG8861	0.121792	0.0246275	0.261	0.279	1
FBgn0265182	CG44247	CG44247	0.121888	0.0359425	0.26	0.226	1
FBgn0013981	CG3379	His4r	0.123927	-0.363339	0.909	0.935	1
FBgn0261574	CG7749	kug	0.124221	0.0618512	0.195	0.155	1
FBgn0250910	CG42244	Octbeta3R	0.126129	0.0245349	0.171	0.164	1
FBgn0041707	CG1168	7B2	0.126635	-0.445864	0.782	0.845	1
FBgn0260657	CG42540	CG42540	0.128188	0.339078	0.786	0.712	1
FBgn0036801	CG6896	MYPT-75D	0.128337	0.0809382	0.261	0.227	1
FBgn0050158	CG30158	CG30158	0.129067	0.0138377	0.136	0.125	1
FBgn0086359	CG3953	Invadolysin	0.129103	0.00171389	0.163	0.164	1
FBgn0004858	CG4220	elB	0.129953	0.00316323	0.204	0.201	1
FBgn0037153	CG12673	olf413	0.131807	0.107093	0.36	0.313	1
FBgn0004580	CG6702	Cbp53E	0.132476	0.274787	0.503	0.438	1
FBgn0024841	CG1963	Pcd	0.133491	-0.046908	0.236	0.263	1
FBgn0039089	CG10152	beat-IV	0.135942	-0.0264755	0.22	0.245	1
FBgn0264273	CG33960	Sema2b	0.139958	0.064387	0.275	0.245	1
FBgn0083963	CG34127	Nlg3	0.141973	-0.0440037	0.598	0.596	1
FBgn0260941	CG42318	app	0.144309	0.0528717	0.193	0.159	1
FBgn0032840	CG13968	sNPF	0.148963	0.147115	0.16	0.153	1
FBgn0085447	CG34418	sif	0.151096	0.548885	0.614	0.39	1
FBgn0264574	CG43946	Glut1	0.152289	0.162392	0.402	0.345	1
FBgn0003423	CG1417	slgA	0.154509	0.106699	0.345	0.312	1
FBgn0010412	CG4464	RpS19a	0.15489	0.00449163	0.324	0.332	1
FBgn0035816	CG13685	CG13685	0.157408	0.0661859	0.205	0.16	1
FBgn0001078	CG4059	ftz-f1	0.160235	0.0961969	0.304	0.231	1
FBgn0261999	CG42817	Ca-Ma2d	0.16038	0.0183709	0.222	0.21	1
FBgn0266137	CG18741	Dop1R2	0.161629	-0.0226736	0.099	0.109	1
FBgn0038498	CG14334	beat-IIa	0.162984	0.127274	0.335	0.286	1
FBgn0031016	CG12199	kek5	0.166392	0.0318723	0.131	0.112	1
FBgn0033791	CG3915	Drl-2	0.166717	0.026194	0.196	0.173	1
FBgn0044328	CG32052	CG32052	0.169985	-0.039255	0.284	0.303	1
FBgn0284243	CG9277	betaTub56D	0.172527	-0.1487	0.273	0.346	1
FBgn0033358	CG8216	spab	0.172812	-0.145527	0.356	0.376	1
FBgn0263257	CG43395	Cngl	0.176828	0.675472	0.68	0.63	1
FBgn0029123	CG18024	SoxN	0.177012	0.0825746	0.182	0.138	1
FBgn0052062	CG32062	Rbfox1	0.177466	0.574999	0.836	0.791	1
FBgn0264606	CG43955	Fife	0.180383	-0.0702297	0.565	0.602	1
FBgn0004198	CG11387	ct	0.180887	0.218376	0.207	0.119	1
FBgn0260462	CG12163	CG12163	0.18338	0.0147769	0.151	0.139	1
FBgn0264975	CG1634	Nrg	0.185412	0.0851653	0.254	0.205	1
FBgn0002643	CG8118	mam	0.186071	0.0801446	0.214	0.167	1
FBgn0052432	CG32432	CG32432	0.186516	-0.00446707	0.219	0.214	1
FBgn0015229	CG6575	glec	0.18693	0.114114	0.277	0.221	1
FBgn0052264	CG32264	CG32264	0.188816	0.499624	0.726	0.644	1
FBgn0034731	CG10384	CG10384	0.193311	0.045693	0.251	0.22	1
FBgn0039064	CG4467	CG4467	0.193683	0.479318	0.634	0.506	1
FBgn0262593	CG43128	Shab	0.200938	0.212328	0.538	0.459	1
FBgn0259213	CG42313	side-II	0.20142	-0.0454908	0.371	0.41	1
FBgn0285948	CG15442	RpL27A	0.202233	0.0167534	0.637	0.65	1
FBgn0052183	CG32183	Ccn	0.208117	0.029892	0.174	0.152	1
FBgn0261285	CG5629	Ppcs	0.213252	0.0312752	0.185	0.168	1
FBgn0034408	CG12758	sano	0.214497	-0.00281176	0.096	0.108	1
FBgn0085384	CG34355	CG34355	0.219689	0.0790448	0.239	0.185	1
FBgn0025360	CG18455	Optix	0.22156	-0.0599861	0.127	0.137	1
FBgn0041094	CG7590	scyl	0.224856	0.143626	0.429	0.378	1
FBgn0036927	CG7433	Gabat	0.225814	0.00898138	0.221	0.218	1
FBgn0260658	CG42541	CG42541	0.227544	-0.340168	0.559	0.587	1
FBgn0034138	CG8332	RpS15	0.22833	-0.482283	0.742	0.844	1
FBgn0027608	CG2082	CG2082	0.228794	0.0288961	0.321	0.313	1
FBgn0033250	CG14762	CG14762	0.228891	-0.0635631	0.659	0.694	1
FBgn0261556	CG42674	CG42674	0.230849	-0.0969263	0.185	0.225	1
FBgn0039584	CG14064	beat-VI	0.233414	0.0615129	0.264	0.224	1
FBgn0010113	CG15532	hdc	0.233431	0.587648	0.764	0.708	1
FBgn0028369	CG3653	kirre	0.234425	0.215037	0.352	0.266	1
FBgn0261244	CG33174	inaE	0.237782	0.0584498	0.356	0.32	1
FBgn0024963	CG7535	GluClalpha	0.239993	0.0978409	0.728	0.694	1
FBgn0263995	CG43738	cpo	0.241393	0.341294	0.808	0.783	1
FBgn0022382	CG15862	Pka-R2	0.250694	0.202753	0.401	0.324	1
FBgn0264490	CG18389	Eip93F	0.25323	0.246985	0.287	0.237	1
FBgn0053179	CG33179	beat-IIIb	0.26156	-0.0215682	0.349	0.363	1
FBgn0052406	CG32406	PVRAP	0.262137	0.023522	0.123	0.104	1
FBgn0031374	CG7337	Wdr62	0.262803	-0.015835	0.403	0.415	1
FBgn0259111	CG42253	Ndae1	0.264405	0.0351659	0.182	0.152	1
FBgn0051646	CG31646	DIP-theta	0.272801	0.104137	0.217	0.184	1
FBgn0010473	CG15427	tutl	0.276471	0.273291	0.692	0.625	1
FBgn0085370	CG34341	Pde11	0.276614	0.0221369	0.169	0.156	1
FBgn0263980	CG43729	Stacl	0.285961	-0.186396	0.669	0.68	1
FBgn0003165	CG9755	pum	0.289138	0.812621	0.843	0.754	1
FBgn0263392	CG43444	Tet	0.291553	0.0764693	0.537	0.527	1
FBgn0038653	CG18208	Octalpha2R	0.292095	-0.0206252	0.341	0.356	1
FBgn0050463	CG30463	Pgant9	0.293708	0.0699557	0.265	0.225	1
FBgn0053202	CG33202	dpr11	0.297499	0.070893	0.314	0.288	1
FBgn0267668	CR46006	lncRNA:CR46006	0.29828	0.0472406	0.112	0.087	1
FBgn0250867	CG42238	CG42238	0.304808	0.0519004	0.173	0.139	1
FBgn0011661	CG10701	Moe	0.306449	-0.0213187	0.212	0.236	1
FBgn0266871	CR45332	lncRNA:CR45332	0.309262	-0.0181801	0.113	0.132	1
FBgn0003499	CG7847	sr	0.318109	-0.00486389	0.217	0.218	1
FBgn0019650	CG11186	toy	0.319079	0.0503188	0.235	0.212	1
FBgn0066101	CG31094	LpR1	0.320658	0.0793963	0.255	0.23	1
FBgn0036851	CG14082	CG14082	0.328669	0.0142156	0.124	0.113	1
FBgn0266801	CG45263	CG45263	0.329101	-0.0316399	0.48	0.509	1
FBgn0030505	CG11172	NFAT	0.341847	0.119129	0.434	0.391	1
FBgn0037525	CG17816	CG17816	0.343781	0.203433	0.513	0.447	1
FBgn0011818	CG9884	oaf	0.345655	0.0489242	0.164	0.136	1
FBgn0086604	CG12484	side-VIII	0.345902	0.0405211	0.214	0.203	1
FBgn0035032	CG4692	ATPsynF	0.350987	-0.39228	0.651	0.731	1
FBgn0036043	CG8177	CG8177	0.35216	-0.00833891	0.388	0.389	1
FBgn0259789	CG12701	zld	0.353363	0.0638712	0.192	0.173	1
FBgn0053543	CG33543	CG33543	0.356493	0.0056084	0.347	0.331	1
FBgn0261555	CG42673	CG42673	0.363616	-0.00495837	0.116	0.124	1
FBgn0003429	CG10693	slo	0.372271	0.445634	0.758	0.694	1
FBgn0029897	CG3203	RpL17	0.37366	-0.257061	0.529	0.64	1
FBgn0086758	CG31666	chinmo	0.374755	0.406987	0.786	0.744	1
FBgn0032833	CG10664	COX4	0.376503	-0.503711	0.636	0.758	1
FBgn0264087	CG43756	Slob	0.376679	0.0235938	0.233	0.222	1
FBgn0031632	CG15628	CG15628	0.376952	-0.00583705	0.479	0.484	1
FBgn0083949	CG34113	side-III	0.38267	0.0990333	0.484	0.453	1
FBgn0053517	CG33517	Dop2R	0.38351	0.293455	0.848	0.828	1
FBgn0261089	CG5559	Sytalpha	0.383703	0.0469118	0.179	0.147	1
FBgn0032400	CG6770	CG6770	0.386177	0.0417947	0.647	0.64	1
FBgn0034286	CG33996	dpr13	0.390122	0.0886536	0.368	0.332	1
FBgn0028496	CG30116	CG30116	0.391218	-0.065003	0.411	0.446	1
FBgn0286778	CG46385	CG46385	0.392247	0.158182	0.41	0.357	1
FBgn0035499	CG14996	Chd64	0.396193	0.00272106	0.131	0.136	1
FBgn0033192	CG2105	Corin	0.396706	0.044871	0.261	0.239	1
FBgn0039420	CG6154	CG6154	0.397708	0.0373616	0.19	0.171	1
FBgn0263289	CG43398	scrib	0.399931	0.000648141	0.19	0.201	1
FBgn0000535	CG10952	eag	0.406255	0.118134	0.368	0.334	1
FBgn0264000	CG43743	GluRIB	0.414378	0.13922	0.344	0.304	1
FBgn0027589	CG1688	CG1688	0.416468	0.00496593	0.163	0.161	1
FBgn0083991	CG34155	CG34155	0.419136	-0.0164284	0.107	0.128	1
FBgn0263131	CG43373	CG43373	0.423475	0.0148279	0.115	0.1	1
FBgn0261597	CG10305	RpS26	0.428429	-0.318137	0.735	0.805	1
FBgn0260793	CG42573	2mit	0.431949	0.0564922	0.238	0.199	1
FBgn0032629	CG15138	beat-IIIc	0.433553	0.215651	0.394	0.341	1
FBgn0038929	CG13408	CG13408	0.435109	-0.0149866	0.093	0.104	1
FBgn0083950	CG34114	side-VI	0.437653	0.213934	0.447	0.368	1
FBgn0038321	CG6218	CG6218	0.437918	-0.00325582	0.104	0.105	1
FBgn0000116	CG32031	Argk	0.444429	0.130647	0.611	0.545	1
FBgn0030412	CG17762	Tomosyn	0.4472	0.225116	0.645	0.581	1
FBgn0031770	CG13995	CG13995	0.456443	-0.0175905	0.284	0.29	1
FBgn0266756	CG44012	btsz	0.459379	0.0175848	0.159	0.152	1
FBgn0259244	CG42342	CG42342	0.459856	-0.10622	0.416	0.44	1
FBgn0032901	CG9339	sky	0.461224	-0.00516245	0.393	0.416	1
FBgn0004369	CG11516	Ptp99A	0.462712	0.280244	0.701	0.659	1
FBgn0261552	CG42670	ps	0.463406	0.0235787	0.937	0.961	1
FBgn0011582	CG9652	Dop1R1	0.468205	0.0988349	0.279	0.266	1
FBgn0259108	CG34387	futsch	0.474805	0.504461	0.936	0.895	1
FBgn0029663	CG10804	CG10804	0.48139	0.0843962	0.197	0.137	1
FBgn0263353	CG11000	CG11000	0.483844	0.0399013	0.542	0.536	1
FBgn0016797	CG9739	fz2	0.486822	0.0954751	0.298	0.256	1
FBgn0261258	CG6014	rgn	0.490549	0.00530417	0.282	0.288	1
FBgn0035495	CG14989	CG14989	0.491716	0.13604	0.334	0.257	1
FBgn0267253	CG32700	CG32700	0.492938	0.114341	0.36	0.336	1
FBgn0085413	CG34384	CG34384	0.501214	0.0658723	0.268	0.234	1
FBgn0264815	CG44007	Pde1c	0.506011	0.129802	0.376	0.332	1
FBgn0010411	CG8900	RpS18	0.512674	-0.620116	0.734	0.858	1
FBgn0261509	CG14351	haf	0.517429	0.0152795	0.14	0.125	1
FBgn0015609	CG7100	CadN	0.522027	0.24741	0.595	0.548	1
FBgn0051774	CG31774	fred	0.525412	0.0593493	0.26	0.242	1
FBgn0283451	CG11491	br	0.528557	0.151548	0.264	0.27	1
FBgn0270928	CG32848	VAChT	0.531579	0.10285	0.697	0.692	1
FBgn0039816	CG11317	CG11317	0.534086	-0.0263735	0.177	0.193	1
FBgn0259171	CG42276	Pde9	0.535631	0.00273428	0.599	0.608	1
FBgn0013973	CG1470	Gycbeta100B	0.541915	0.035232	0.204	0.178	1
FBgn0259243	CG42341	Pka-R1	0.543643	0.0916902	0.388	0.339	1
FBgn0037015	CG13253	cmpy	0.551582	0.050623	0.271	0.244	1
FBgn0004242	CG3139	Syt1	0.552936	0.610059	0.891	0.844	1
FBgn0010452	CG11280	trn	0.555211	0.000204079	0.159	0.149	1
FBgn0250908	CG42242	beat-VII	0.556408	0.102138	0.441	0.409	1
FBgn0030574	CG9413	sbm	0.557091	0.0346973	0.149	0.126	1
FBgn0052600	CG32600	dpr8	0.563433	0.144161	0.431	0.396	1
FBgn0051760	CG31760	CG31760	0.570317	0.0449485	0.195	0.183	1
FBgn0051665	CG31665	wry	0.572338	0.173883	0.422	0.358	1
FBgn0028645	CG7644	beat-Ib	0.574433	0.0682249	0.33	0.313	1
FBgn0000303	CG12345	ChAT	0.575979	0.00824632	0.506	0.506	1
FBgn0000273	CG4379	Pka-C1	0.579314	0.225052	0.586	0.515	1
FBgn0263219	CG42330	Dscam4	0.579434	0.0471858	0.217	0.194	1
FBgn0260660	CG42543	Mp	0.582807	0.072673	0.396	0.364	1
FBgn0036494	CG7250	Toll-6	0.584846	0.0765581	0.345	0.315	1
FBgn0000036	CG5610	nAChRalpha1	0.592238	0.152871	0.465	0.43	1
FBgn0038494	CG4135	beat-IIb	0.593681	0.00653621	0.117	0.114	1
FBgn0262509	CG43079	nrm	0.597127	0.0928164	0.314	0.278	1
FBgn0033484	CG2269	CG2269	0.598403	-0.0491812	0.798	0.782	1
FBgn0023534	CG17778	CG17778	0.599198	0.00453888	0.176	0.173	1
FBgn0038237	CG8279	Pde6	0.603861	0.235821	0.567	0.531	1
FBgn0013576	CG32464	mtd	0.604633	0.45878	0.777	0.696	1
FBgn0285963	CG46339	CG46339	0.604932	0.0281497	0.138	0.117	1
FBgn0035171	CG12502	CG12502	0.606199	0.000289112	0.158	0.155	1
FBgn0038063	CG33976	Octbeta2R	0.610655	0.141272	0.363	0.324	1
FBgn0035756	CG32381	unc-13-4A	0.613907	0.0998968	0.392	0.377	1
FBgn0264895	CG44086	RapGAP1	0.61432	0.138511	0.437	0.399	1
FBgn0261836	CG42768	Msp300	0.618142	0.3983	0.837	0.793	1
FBgn0053516	CG33516	dpr3	0.61829	0.0138207	0.144	0.136	1
FBgn0013467	CG18285	igl	0.620983	0.332464	0.557	0.469	1
FBgn0029814	CG15765	CG15765	0.623515	0.137166	0.494	0.49	1
FBgn0025682	CG9148	scf	0.623825	-0.00498294	0.105	0.108	1
FBgn0085383	CG34354	CG34354	0.625667	0.119976	0.408	0.364	1
FBgn0263930	CG4974	dally	0.635333	-0.00699916	0.212	0.212	1
FBgn0038084	CG14390	beat-Vc	0.636612	0.00705585	0.12	0.116	1
FBgn0263220	CG43388	Hk	0.63832	0.355674	0.754	0.677	1
FBgn0261804	CG42750	CG42750	0.63879	-0.00216551	0.457	0.446	1
FBgn0261788	CG42734	Ank2	0.639458	0.529954	0.84	0.748	1
FBgn0000633	CG17716	CG17716	0.641688	0.180251	0.464	0.419	1
FBgn0263994	CG43737	CG43737	0.643763	0.287948	0.55	0.475	1
FBgn0262636	CG2052	dati	0.645113	0.248419	0.618	0.598	1
FBgn0013733	CG18076	shot	0.646949	0.0734327	0.348	0.308	1
FBgn0000028	CG9151	acj6	0.656651	0.115216	0.198	0.198	1
FBgn0000179	CG3578	bi	0.658808	0.131518	0.228	0.203	1
FBgn0052626	CG32626	AMPdeam	0.663797	0.00813672	0.15	0.147	1
FBgn0002593	CG4087	RpLP1	0.671623	-0.323795	0.601	0.706	1
FBgn0003091	CG6622	Pkc53E	0.673576	0.402879	0.572	0.507	1
FBgn0262737	CG7437	mub	0.67574	0.774009	0.787	0.646	1
FBgn0053147	CG33147	Hs3st-A	0.682279	0.188273	0.71	0.664	1
FBgn0085407	CG34378	Pvf3	0.684047	0.266373	0.477	0.421	1
FBgn0050419	CG30419	CG30419	0.684533	-0.0114247	0.177	0.184	1
FBgn0030174	CG15312	CG15312	0.684913	0.0164511	0.216	0.208	1
FBgn0033108	CG15236	CG15236	0.686388	0.0815769	0.341	0.332	1
FBgn0039380	CG5890	CG5890	0.689819	0.0477205	0.284	0.264	1
FBgn0259216	CG42316	RhoGAP102A	0.693971	0.0110713	0.138	0.128	1
FBgn0085391	CG34362	trv	0.696819	0.62672	0.743	0.663	1
FBgn0011656	CG1429	Mef2	0.697137	0.0681701	0.284	0.242	1
FBgn0037521	CG2993	CG2993	0.705564	0.0374618	0.416	0.397	1
FBgn0261549	CG42667	rdgA	0.710077	0.127722	0.443	0.413	1
FBgn0053143	CG33143	CG33143	0.714447	-0.042696	0.362	0.368	1
FBgn0001233	CG1242	Hsp83	0.714979	-0.116503	0.644	0.655	1
FBgn0036165	CG7533	chrb	0.715642	0.307701	0.686	0.6	1
FBgn0031424	CG9887	VGlut	0.716952	0.0842451	0.122	0.091	1
FBgn0000575	CG1007	emc	0.721054	0.0517776	0.33	0.298	1
FBgn0265487	CG33197	mbl	0.722412	0.146276	0.542	0.525	1
FBgn0085395	CG34366	Shawl	0.730552	0.00817829	0.15	0.151	1
FBgn0035041	CG13594	CG13594	0.730673	0.011625	0.131	0.123	1
FBgn0004514	CG7485	Oct-TyrR	0.735762	-0.00951236	0.149	0.15	1
FBgn0052506	CG32506	CG32506	0.742586	0.0559291	0.288	0.269	1
FBgn0023179	CG6438	amon	0.745269	0.129845	0.409	0.351	1
FBgn0085432	CG34403	pan	0.748884	0.814407	0.793	0.646	1
FBgn0005775	CG7503	Con	0.748951	0.433317	0.602	0.529	1
FBgn0027598	CG31012	cindr	0.763015	0.170414	0.438	0.377	1
FBgn0005771	CG4491	noc	0.764926	-0.01979	0.125	0.14	1
FBgn0000042	CG4027	Act5C	0.781055	-0.0287393	0.745	0.759	1
FBgn0032666	CG5758	CG5758	0.788196	0.0252794	0.217	0.218	1
FBgn0039617	CG14521	DIP-gamma	0.788719	0.0151189	0.194	0.181	1
FBgn0032048	CG13094	Dh31	0.803861	0.120418	0.148	0.136	1
FBgn0259821	CG42402	CG42402	0.805127	0.195077	0.422	0.37	1
FBgn0030723	CG14948	dpr18	0.814946	-0.00827844	0.117	0.127	1
FBgn0039647	CG14509	jus	0.815349	0.0620703	0.426	0.427	1
FBgn0011828	CG12002	Pxn	0.824964	-0.0235787	0.093	0.104	1
FBgn0263773	CG43690	fok	0.825129	0.0139038	0.175	0.171	1
FBgn0086677	CG30040	jeb	0.825263	0.549744	0.751	0.714	1
FBgn0051361	CG31361	dpr17	0.829479	0.00116023	0.158	0.159	1
FBgn0052017	CG32017	CG32017	0.833355	0.153078	0.362	0.292	1
FBgn0017590	CG6669	klg	0.838654	-0.102128	0.529	0.566	1
FBgn0028370	CG4192	kek3	0.847138	0.0156574	0.132	0.119	1
FBgn0085419	CG34390	Rgk2	0.851445	0.0230175	0.164	0.146	1
FBgn0001085	CG17697	fz	0.854451	0.0399353	0.193	0.177	1
FBgn0033405	CG13954	CG13954	0.860688	0.0138415	0.278	0.276	1
FBgn0085421	CG34392	Epac	0.881012	0.0482553	0.309	0.295	1
FBgn0262869	CG43224	Gfrl	0.883754	0.172487	0.46	0.427	1
FBgn0264503	CG43902	CG43902	0.888322	0.0995265	0.284	0.277	1
FBgn0036935	CG14186	CG14186	0.896944	-0.00315756	0.162	0.162	1
FBgn0262018	CG42829	CadN2	0.898822	0.0286183	0.158	0.15	1
FBgn0036844	CG14080	Mkp3	0.900347	0.103708	0.46	0.44	1
FBgn0035170	CG12191	dpr20	0.901924	-0.00240927	0.103	0.108	1
FBgn0085409	CG34380	smal	0.905954	0.0286713	0.311	0.302	1
FBgn0004509	CG10772	Fur1	0.906826	0.0309804	0.214	0.199	1
FBgn0011224	CG31000	heph	0.906876	1.1205	0.773	0.734	1
FBgn0010263	CG3151	Rbp9	0.906964	0.232947	0.586	0.542	1
FBgn0028875	CG32975	nAChRalpha5	0.910711	0.573295	0.845	0.801	1
FBgn0015399	CG12283	kek1	0.923237	0.12392	0.456	0.427	1
FBgn0015400	CG4977	kek2	0.929684	0.017685	0.362	0.361	1
FBgn0033268	CG2297	Obp44a	0.932912	-0.041566	0.148	0.157	1
FBgn0085414	CG34385	dpr12	0.936619	0.0445516	0.453	0.426	1
FBgn0265002	CG44153	CG44153	0.940535	0.0246142	0.251	0.25	1
FBgn0261988	CG17998	Gprk2	0.941834	0.135873	0.422	0.369	1
FBgn0260943	CG32169	Rbp6	0.942857	0.699359	0.861	0.834	1
FBgn0016061	CG31062	side	0.944426	0.0872269	0.495	0.467	1
FBgn0265598	CG44425	Bx	0.945912	0.0434802	0.18	0.163	1
FBgn0267336	CG34360	Glut4EF	0.94632	0.45272	0.834	0.795	1
FBgn0264006	CG43749	dysc	0.947471	0.319649	0.811	0.789	1
FBgn0030272	CG15201	CG15201	0.947639	0.014501	0.105	0.104	1
FBgn0266100	CG44837	CG44837	0.951065	0.0158577	0.161	0.162	1
FBgn0264908	CG44099	pHCl-1	0.958252	0.105031	0.318	0.284	1
FBgn0085434	CG34405	NaCP60E	0.959023	0.312837	0.7	0.623	1
FBgn0038980	CG6919	Octbeta1R	0.97004	0.00190663	0.15	0.145	1
FBgn0039054	CG13830	Cow	0.974209	0.136597	0.481	0.447	1
FBgn0033438	CG1794	Mmp2	0.979787	-0.00836158	0.282	0.275	1
FBgn0040726	CG13439	dpr1	0.982496	0.0844567	0.308	0.279	1
FBgn0085412	CG34383	kmr	0.984795	0.0426582	0.257	0.235	1
FBgn0034636	CG10440	twz	0.991863	0.0268232	0.13	0.128	1
FBgn0261871	CG33507	dpr2	0.993436	0.00410426	0.13	0.131	1

## Sheet: Female_C6
FlyBaseID	GeneID	Gene symbol	p_val	avg_diff	pct.1	pct.2	p_val_adj
FBgn0019660	CR32665	lncRNA:roX2	0	-3.13685	0.008	0.89	0
FBgn0085753	CR40596	28SrRNA-Psi:CR40596	7.62973e-49	0.152235	0.133	0.019	1.14446e-45
FBgn0013688	CR34096	mt:srRNA	6.43741e-30	0.116698	0.108	0.021	9.65611e-27
FBgn0011693	CG4899	Pdh	1.20381e-21	-0.160789	0.021	0.109	1.80571e-18
FBgn0003301	CG9533	rut	1.65823e-20	0.150192	0.23	0.119	2.48734e-17
FBgn0033987	CG12424	ckn	4.32209e-19	0.196377	0.238	0.112	6.48314e-16
FBgn0013995	CG5685	Calx	4.75091e-17	0.210465	0.233	0.114	7.12636e-14
FBgn0052683	CG32683	CG32683	1.96876e-16	0.176518	0.229	0.122	2.95313e-13
FBgn0058469	CR40469	lncRNA:CR40469	2.24999e-16	0.114007	0.138	0.062	3.37499e-13
FBgn0052057	CG32057	dpr10	3.82624e-16	0.16646	0.238	0.134	5.73935e-13
FBgn0002940	CG4550	ninaE	4.29275e-16	-0.0988656	0.075	0.155	6.43912e-13
FBgn0004619	CG8442	GluRIA	6.78219e-16	0.167643	0.247	0.149	1.01733e-12
FBgn0267910	CR34335	lncRNA:CR34335	6.63713e-15	4.65379	0.992	0.941	9.95569e-12
FBgn0285879	CG32577	disco-r	3.43474e-13	0.241484	0.191	0.085	5.15211e-10
FBgn0000121	CG5962	Arr2	4.83843e-13	-0.0944602	0.057	0.131	7.25764e-10
FBgn0042696	CG2380	NfI	1.27847e-12	0.156762	0.24	0.142	1.9177e-09
FBgn0267322	CR45758	lncRNA:CR45758	1.65581e-12	0.112014	0.218	0.137	2.48371e-09
FBgn0033403	CG13739	CG13739	2.46068e-12	0.158792	0.237	0.155	3.69101e-09
FBgn0038641	CG7708	ChT	2.59342e-12	0.0611022	0.149	0.097	3.89014e-09
FBgn0004395	CG4620	unk	9.97007e-12	0.141416	0.206	0.117	1.49551e-08
FBgn0038246	CG14853	CG14853	1.65132e-11	0.109266	0.189	0.116	2.47698e-08
FBgn0004652	CG14307	fru	3.25113e-11	0.668103	0.385	0.217	4.8767e-08
FBgn0036789	CG13702	AstC-R2	3.36056e-11	0.112599	0.15	0.083	5.04085e-08
FBgn0051163	CG31163	SKIP	1.12352e-10	0.192717	0.303	0.194	1.68527e-07
FBgn0265595	CG44422	CG44422	1.58249e-10	0.269822	0.329	0.199	2.37373e-07
FBgn0052982	CG32982	CG32982	2.90784e-10	0.0936385	0.17	0.108	4.36175e-07
FBgn0002868	CG9470	MtnA	4.37275e-10	0.167903	0.247	0.166	6.55913e-07
FBgn0259170	CG42275	alpha-Man-Ia	1.59321e-09	0.136365	0.23	0.158	2.38981e-06
FBgn0260971	CG42594	CG42594	1.66203e-09	0.180831	0.24	0.141	2.49304e-06
FBgn0033356	CG8229	CG8229	3.65372e-09	-0.0759348	0.108	0.167	5.48058e-06
FBgn0039209	CG13624	REPTOR	5.7065e-09	0.161309	0.274	0.181	8.55975e-06
FBgn0010300	CG10719	brat	8.83055e-09	0.28029	0.312	0.19	1.32458e-05
FBgn0014163	CG4609	fax	6.58483e-08	0.582294	0.59	0.375	9.87725e-05
FBgn0026160	CG7958	tna	6.68717e-08	0.332523	0.445	0.308	0.000100307
FBgn0039349	CG4685	Ssadh	1.76549e-07	-0.112497	0.097	0.183	0.000264823
FBgn0283499	CG18402	InR	1.87628e-07	0.105064	0.236	0.174	0.000281442
FBgn0036454	CG17839	CG17839	3.09145e-07	0.12228	0.224	0.149	0.000463718
FBgn0000547	CG12676	ed	3.41563e-07	0.200823	0.238	0.16	0.000512344
FBgn0031306	CG4577	CG4577	4.65947e-07	0.150093	0.202	0.126	0.00069892
FBgn0019662	CG8593	qm	4.87215e-07	0.0454	0.147	0.108	0.000730822
FBgn0051814	CG31814	DIP-kappa	5.15822e-07	0.141568	0.156	0.085	0.000773734
FBgn0083228	CG5907	Frq2	5.1705e-07	0.299366	0.401	0.291	0.000775574
FBgn0020269	CG10145	mspo	5.53117e-07	0.0905901	0.206	0.147	0.000829676
FBgn0037153	CG12673	olf413	7.64959e-07	0.194437	0.281	0.191	0.00114744
FBgn0035050	CG4871	SiaT	8.92961e-07	0.0811647	0.119	0.061	0.00133944
FBgn0029922	CG14431	CG14431	9.55333e-07	0.0534023	0.115	0.066	0.001433
FBgn0035816	CG13685	CG13685	1.0456e-06	0.0724484	0.194	0.136	0.0015684
FBgn0085399	CG34370	CG34370	1.26605e-06	0.0887402	0.192	0.14	0.00189907
FBgn0001091	CG12055	Gapdh1	1.27989e-06	-0.181161	0.262	0.359	0.00191984
FBgn0085385	CG34356	bma	2.35613e-06	0.0539745	0.17	0.14	0.0035342
FBgn0013733	CG18076	shot	2.40956e-06	0.18697	0.307	0.204	0.00361433
FBgn0260943	CG32169	Rbp6	2.54886e-06	1.04943	0.878	0.805	0.00382329
FBgn0065099	CR33925	snRNA:7SK	2.58698e-06	3.83972	0.716	0.474	0.00388047
FBgn0083950	CG34114	side-VI	2.63506e-06	0.388565	0.467	0.328	0.00395259
FBgn0265052	CG44167	St3	4.19757e-06	0.120252	0.232	0.163	0.00629636
FBgn0261260	CG42611	mgl	4.28128e-06	0.0667444	0.108	0.066	0.00642192
FBgn0051324	CG31324	CG31324	4.41101e-06	0.232594	0.328	0.231	0.00661652
FBgn0250867	CG42238	CG42238	7.91935e-06	0.0326794	0.184	0.16	0.011879
FBgn0261649	CG31247	tinc	9.5546e-06	0.0558932	0.132	0.093	0.0143319
FBgn0052521	CG32521	CG32521	1.04162e-05	0.0598182	0.119	0.085	0.0156242
FBgn0051760	CG31760	CG31760	1.05963e-05	0.037445	0.122	0.087	0.0158945
FBgn0051690	CG31690	CG31690	1.50562e-05	0.102138	0.218	0.16	0.0225843
FBgn0027356	CG8604	Amph	1.93816e-05	0.0656703	0.149	0.114	0.0290724
FBgn0039064	CG4467	CG4467	1.95096e-05	0.486255	0.56	0.398	0.0292645
FBgn0086778	CG32538	nAChRalpha7	1.99463e-05	0.50586	0.548	0.48	0.0299194
FBgn0023095	CG11282	caps	2.42873e-05	0.042939	0.157	0.132	0.036431
FBgn0031736	CG11030	CG11030	2.90628e-05	0.0838377	0.163	0.116	0.0435942
FBgn0267033	CG45477	mamo	3.02941e-05	0.846324	0.606	0.534	0.0454411
FBgn0262473	CG5490	Tl	3.58871e-05	0.0616403	0.13	0.091	0.0538307
FBgn0050463	CG30463	Pgant9	3.84605e-05	0.139373	0.273	0.202	0.0576907
FBgn0261262	CG42613	CG42613	4.04906e-05	0.385197	0.445	0.305	0.0607359
FBgn0051646	CG31646	DIP-theta	4.1558e-05	0.153206	0.238	0.164	0.062337
FBgn0286778	CG46385	CG46385	4.17026e-05	0.281143	0.336	0.227	0.0625538
FBgn0030913	CG6123	CG6123	4.87523e-05	0.0430225	0.206	0.177	0.0731284
FBgn0011224	CG31000	heph	5.24831e-05	0.902382	0.633	0.524	0.0787246
FBgn0034753	CG2852	CG2852	5.40235e-05	-0.233363	0.319	0.44	0.0810352
FBgn0262160	CG9932	CG9932	5.56425e-05	0.243805	0.298	0.206	0.0834637
FBgn0034731	CG10384	CG10384	7.42727e-05	0.0925213	0.262	0.2	0.111409
FBgn0000459	CG9908	disco	0.000107147	0.222148	0.219	0.154	0.16072
FBgn0259677	CG42346	CG42346	0.000108504	0.0872761	0.152	0.109	0.162756
FBgn0267579	CR45919	lncRNA:CR45919	0.000112666	0.0305661	0.103	0.075	0.168998
FBgn0029768	CG16752	SPR	0.000121465	0.0769331	0.123	0.085	0.182198
FBgn0264000	CG43743	GluRIB	0.000127515	0.295668	0.34	0.238	0.191273
FBgn0015777	CG9261	nrv2	0.000131444	0.0324201	0.152	0.132	0.197165
FBgn0052206	CG32206	CG32206	0.000144025	0.178685	0.307	0.232	0.216037
FBgn0001085	CG17697	fz	0.000156024	0.0664441	0.173	0.137	0.234036
FBgn0260442	CG6831	rhea	0.000156801	0.0274363	0.104	0.081	0.235201
FBgn0086604	CG12484	side-VIII	0.000179004	0.0660819	0.156	0.106	0.268506
FBgn0263706	CG43658	CG43658	0.000180124	-0.010961	0.189	0.201	0.270186
FBgn0015519	CG2302	nAChRalpha3	0.000254212	0.114901	0.29	0.233	0.381317
FBgn0011666	CG5099	msi	0.000262625	0.743516	0.633	0.419	0.393938
FBgn0085413	CG34384	CG34384	0.000284755	0.138044	0.304	0.238	0.427132
FBgn0066084	CG30425	RpL41	0.000315626	1.21939	0.815	0.464	0.473439
FBgn0085380	CG34351	CG34351	0.000323667	0.0914563	0.142	0.09	0.485501
FBgn0259234	CG42332	Camta	0.000356436	0.0812245	0.208	0.156	0.534654
FBgn0034725	CG6044	CG6044	0.000361904	-0.030621	0.325	0.359	0.542856
FBgn0031632	CG15628	CG15628	0.000370584	-0.0910558	0.502	0.576	0.555876
FBgn0053087	CG33087	LRP1	0.000372752	0.0532994	0.113	0.071	0.559128
FBgn0066101	CG31094	LpR1	0.000376355	0.0444288	0.163	0.135	0.564532
FBgn0015774	CG10521	NetB	0.000430684	0.102447	0.191	0.148	0.646026
FBgn0036725	CG18265	CG18265	0.000450494	0.0614839	0.102	0.065	0.675741
FBgn0261285	CG5629	Ppcs	0.000486495	0.0319829	0.145	0.123	0.729742
FBgn0032666	CG5758	CG5758	0.000525642	0.00514857	0.182	0.173	0.788463
FBgn0032629	CG15138	beat-IIIc	0.000560138	0.258823	0.276	0.2	0.840206
FBgn0024189	CG33141	sns	0.000577691	0.0564827	0.131	0.089	0.866536
FBgn0004449	CG5723	Ten-m	0.000637278	0.192546	0.342	0.263	0.955917
FBgn0267336	CG34360	Glut4EF	0.000649789	1.07914	0.903	0.865	0.974684
FBgn0019985	CG11144	mGluR	0.000696861	0.10886	0.207	0.15	1
FBgn0085391	CG34362	trv	0.000765485	1.06895	0.725	0.59	1
FBgn0016797	CG9739	fz2	0.00077271	0.148097	0.27	0.204	1
FBgn0250910	CG42244	Octbeta3R	0.000777431	0.0192108	0.197	0.181	1
FBgn0264308	CG43778	CG43778	0.0007992	0.0901549	0.205	0.163	1
FBgn0031299	CG4629	CG4629	0.000810728	0.0377279	0.124	0.101	1
FBgn0263994	CG43737	CG43737	0.000815883	0.447847	0.537	0.394	1
FBgn0003499	CG7847	sr	0.000815972	0.106292	0.15	0.102	1
FBgn0052204	CG32204	CG32204	0.000838394	0.0475843	0.155	0.133	1
FBgn0035756	CG32381	unc-13-4A	0.000869406	0.154486	0.247	0.181	1
FBgn0260429	CG42524	CG42524	0.000920282	0.0127866	0.106	0.092	1
FBgn0010434	CG11949	cora	0.000935323	0.00991409	0.117	0.112	1
FBgn0028369	CG3653	kirre	0.00117382	0.279758	0.343	0.247	1
FBgn0052066	CG32066	CG32066	0.00118418	0.0478353	0.124	0.087	1
FBgn0265194	CG44240	Trpm	0.00126577	0.0533766	0.106	0.072	1
FBgn0010263	CG3151	Rbp9	0.00128832	0.366146	0.49	0.377	1
FBgn0002643	CG8118	mam	0.00129843	0.103246	0.252	0.213	1
FBgn0085447	CG34418	sif	0.00132011	0.873077	0.7	0.485	1
FBgn0027339	CG11352	jim	0.00149014	2.77395	0.985	0.963	1
FBgn0267001	CG42338	Ten-a	0.0015438	1.35469	0.878	0.719	1
FBgn0004198	CG11387	ct	0.00164105	0.929461	0.62	0.501	1
FBgn0039938	CG11153	Sox102F	0.00174411	0.120046	0.192	0.143	1
FBgn0029761	CG10706	SK	0.00182118	0.465193	0.556	0.407	1
FBgn0267668	CR46006	lncRNA:CR46006	0.00191454	0.168681	0.308	0.249	1
FBgn0287186	CG17594	scro	0.00193707	0.143411	0.321	0.258	1
FBgn0004242	CG3139	Syt1	0.00195637	1.00816	0.875	0.856	1
FBgn0032833	CG10664	COX4	0.00197168	-1.02209	0.71	0.888	1
FBgn0264090	CG43759	CG43759	0.00201564	0.0789373	0.163	0.117	1
FBgn0029824	CG3726	CG3726	0.00206623	0.124436	0.223	0.172	1
FBgn0004168	CG16720	5-HT1A	0.00210636	0.141146	0.235	0.183	1
FBgn0004607	CG1449	zfh2	0.00219026	0.067799	0.121	0.083	1
FBgn0040823	CG14162	dpr6	0.00253835	0.0451463	0.332	0.345	1
FBgn0013686	CR34094	mt:lrRNA	0.0027803	12.8561	0.913	0.547	1
FBgn0085397	CG34368	Fili	0.00285037	0.0832975	0.146	0.102	1
FBgn0019643	CG3318	AANAT1	0.00300998	-0.0662369	0.095	0.143	1
FBgn0027598	CG31012	cindr	0.00316027	0.297678	0.563	0.475	1
FBgn0264574	CG43946	Glut1	0.00335956	0.207892	0.367	0.283	1
FBgn0261988	CG17998	Gprk2	0.00338742	0.153165	0.379	0.315	1
FBgn0285963	CG46339	CG46339	0.00404109	0.010375	0.108	0.102	1
FBgn0036801	CG6896	MYPT-75D	0.0040471	0.0951602	0.208	0.165	1
FBgn0030090	CG12664	fend	0.00424619	-0.10474	0.363	0.425	1
FBgn0040397	CG3655	CG3655	0.00433459	0.0783478	0.153	0.109	1
FBgn0259213	CG42313	side-II	0.00444887	-0.148508	0.381	0.442	1
FBgn0028888	CG4168	CG4168	0.00462085	0.0350055	0.104	0.082	1
FBgn0033544	CG7220	CG7220	0.00476411	-0.0294371	0.177	0.199	1
FBgn0038087	CG10134	beat-Va	0.0048937	0.0441202	0.165	0.135	1
FBgn0260658	CG42541	CG42541	0.0049209	-0.545293	0.629	0.707	1
FBgn0037874	CG4800	Tctp	0.00493587	-0.0228995	0.334	0.374	1
FBgn0250839	CG2016	CG2016	0.00508664	0.0647207	0.106	0.068	1
FBgn0085382	CG34353	CG34353	0.00529058	0.17384	0.287	0.236	1
FBgn0263257	CG43395	Cngl	0.00547613	1.00761	0.782	0.631	1
FBgn0003360	CG16944	sesB	0.00594362	-0.185627	0.784	0.849	1
FBgn0262509	CG43079	nrm	0.00597531	0.108301	0.256	0.209	1
FBgn0051665	CG31665	wry	0.00630925	0.185548	0.462	0.401	1
FBgn0270928	CG32848	VAChT	0.00684635	0.219438	0.623	0.633	1
FBgn0040726	CG13439	dpr1	0.0071444	0.220831	0.359	0.299	1
FBgn0024841	CG1963	Pcd	0.00811763	-0.0391412	0.113	0.154	1
FBgn0266871	CR45332	lncRNA:CR45332	0.00846297	0.0534559	0.135	0.094	1
FBgn0036144	CG6207	GlcAT-P	0.00881676	0.0379935	0.21	0.185	1
FBgn0001186	CG3001	Hex-A	0.00939962	0.448784	0.49	0.319	1
FBgn0266801	CG45263	CG45263	0.00944607	0.0653839	0.397	0.406	1
FBgn0042630	CG32139	Sox21b	0.00977861	0.0767273	0.105	0.07	1
FBgn0053639	CG33639	CG33639	0.00987194	0.0389306	0.102	0.072	1
FBgn0259111	CG42253	Ndae1	0.0105823	0.0342381	0.13	0.104	1
FBgn0014859	CG1864	Hr38	0.0108848	-0.370283	0.253	0.291	1
FBgn0011818	CG9884	oaf	0.0112667	0.0585877	0.137	0.099	1
FBgn0000179	CG3578	bi	0.0113604	0.348665	0.333	0.285	1
FBgn0085409	CG34380	smal	0.0130124	0.105375	0.251	0.2	1
FBgn0013954	CG11001	Fkbp12	0.0137295	-0.263591	0.458	0.565	1
FBgn0031971	CG7224	Sirup	0.0137744	-0.0208515	0.081	0.107	1
FBgn0033159	CG17800	Dscam1	0.0143008	0.0575888	0.152	0.123	1
FBgn0003091	CG6622	Pkc53E	0.0143738	0.28502	0.494	0.411	1
FBgn0002945	CG11614	nkd	0.0147542	0.127319	0.274	0.224	1
FBgn0085395	CG34366	Shawl	0.0153913	0.02824	0.169	0.16	1
FBgn0001234	CR31400	lncRNA:Hsromega	0.0157187	4.80459	0.993	0.994	1
FBgn0085383	CG34354	CG34354	0.0158705	0.176848	0.361	0.3	1
FBgn0261698	CG42732	SLO2	0.0163535	0.122187	0.299	0.244	1
FBgn0030897	CG5744	Frq1	0.0167992	0.930685	0.728	0.58	1
FBgn0011661	CG10701	Moe	0.0172005	-0.0413491	0.107	0.135	1
FBgn0015229	CG6575	glec	0.0173122	0.24577	0.393	0.31	1
FBgn0010415	CG10497	Sdc	0.0174656	0.18702	0.629	0.603	1
FBgn0261556	CG42674	CG42674	0.0178271	-0.0966577	0.149	0.199	1
FBgn0265487	CG33197	mbl	0.0189712	0.0783137	0.503	0.494	1
FBgn0000411	CG5893	D	0.0207037	0.0260021	0.101	0.098	1
FBgn0028704	CG18660	Nckx30C	0.021172	0.489307	0.793	0.756	1
FBgn0259789	CG12701	zld	0.0212445	0.0932054	0.165	0.126	1
FBgn0033196	CG1358	CG1358	0.0220866	0.0530186	0.11	0.08	1
FBgn0262593	CG43128	Shab	0.0224266	0.249986	0.447	0.374	1
FBgn0001233	CG1242	Hsp83	0.0230619	-0.187385	0.538	0.608	1
FBgn0264908	CG44099	pHCl-1	0.0231707	0.172147	0.318	0.255	1
FBgn0038653	CG18208	Octalpha2R	0.0237191	0.164181	0.356	0.321	1
FBgn0028481	CG4341	CG4341	0.0239849	0.117096	0.199	0.156	1
FBgn0004611	CG4574	Plc21C	0.0246884	-0.0345954	0.345	0.383	1
FBgn0264975	CG1634	Nrg	0.024866	0.0638524	0.174	0.141	1
FBgn0083949	CG34113	side-III	0.0257425	0.142152	0.5	0.503	1
FBgn0052264	CG32264	CG32264	0.0268952	0.541397	0.767	0.718	1
FBgn0003165	CG9755	pum	0.0275808	1.24806	0.798	0.592	1
FBgn0010411	CG8900	RpS18	0.0280158	-0.694376	0.817	0.906	1
FBgn0260003	CG34157	Dys	0.0287542	0.033342	0.139	0.123	1
FBgn0041605	CG32490	cpx	0.0288343	0.278649	0.991	0.986	1
FBgn0015399	CG12283	kek1	0.0294546	0.164272	0.421	0.411	1
FBgn0000633	CG17716	CG17716	0.0299647	0.263669	0.45	0.358	1
FBgn0004244	CG10537	Rdl	0.0304807	0.860976	0.963	0.956	1
FBgn0265002	CG44153	CG44153	0.0305597	0.136487	0.33	0.291	1
FBgn0028644	CG4838	beat-Ic	0.0311298	0.505746	0.447	0.368	1
FBgn0035499	CG14996	Chd64	0.033008	0.0346496	0.142	0.124	1
FBgn0264815	CG44007	Pde1c	0.0335843	0.151902	0.316	0.252	1
FBgn0263995	CG43738	cpo	0.0348649	0.598152	0.825	0.791	1
FBgn0263219	CG42330	Dscam4	0.034928	0.116176	0.232	0.193	1
FBgn0283451	CG11491	br	0.0353637	0.141516	0.206	0.174	1
FBgn0010313	CG2530	corto	0.0390558	0.11411	0.321	0.281	1
FBgn0029663	CG10804	CG10804	0.0393517	0.0687013	0.172	0.135	1
FBgn0052506	CG32506	CG32506	0.0394251	0.0351745	0.233	0.221	1
FBgn0015400	CG4977	kek2	0.0398275	0.202121	0.477	0.439	1
FBgn0038839	CG10830	Ktl	0.0403549	0.103531	0.269	0.227	1
FBgn0266100	CG44837	CG44837	0.042771	0.0520968	0.138	0.101	1
FBgn0004369	CG11516	Ptp99A	0.0430631	0.519141	0.615	0.521	1
FBgn0284245	CG8280	eEF1alpha1	0.0440803	-0.0316881	0.22	0.252	1
FBgn0052432	CG32432	CG32432	0.0444053	0.101329	0.324	0.274	1
FBgn0000303	CG12345	ChAT	0.0446319	-0.0532216	0.338	0.382	1
FBgn0033484	CG2269	CG2269	0.0456001	-0.113138	0.539	0.591	1
FBgn0032048	CG13094	Dh31	0.0467485	0.15793	0.104	0.081	1
FBgn0260793	CG42573	2mit	0.0473174	0.0775073	0.213	0.177	1
FBgn0085387	CG34358	shakB	0.0480704	0.300797	0.445	0.392	1
FBgn0083975	CG34139	Nlg4	0.0492252	0.0641096	0.196	0.156	1
FBgn0011828	CG12002	Pxn	0.0496206	-0.0182042	0.119	0.141	1
FBgn0001078	CG4059	ftz-f1	0.0498814	0.211911	0.442	0.369	1
FBgn0023179	CG6438	amon	0.0514773	0.117823	0.284	0.227	1
FBgn0033368	CG13743	CG13743	0.0516837	0.0247439	0.11	0.098	1
FBgn0029123	CG18024	SoxN	0.0543994	0.259289	0.402	0.345	1
FBgn0038084	CG14390	beat-Vc	0.0545796	-0.00119642	0.103	0.101	1
FBgn0004885	CG6863	tok	0.0550225	0.0300537	0.104	0.076	1
FBgn0262018	CG42829	CadN2	0.0560452	0.047042	0.139	0.111	1
FBgn0259244	CG42342	CG42342	0.0570592	-0.0539613	0.301	0.342	1
FBgn0003326	CG17579	sca	0.057534	0.0336979	0.102	0.086	1
FBgn0033268	CG2297	Obp44a	0.0587778	-0.0162347	0.185	0.216	1
FBgn0031738	CG9171	CG9171	0.0594821	0.0360838	0.112	0.09	1
FBgn0040765	CG33473	luna	0.0607756	0.138817	0.311	0.269	1
FBgn0010473	CG15427	tutl	0.0641173	0.292785	0.662	0.577	1
FBgn0000575	CG1007	emc	0.0660856	0.187375	0.428	0.375	1
FBgn0041707	CG1168	7B2	0.0666745	-0.425102	0.635	0.774	1
FBgn0261574	CG7749	kug	0.0680733	0.0646971	0.15	0.122	1
FBgn0000108	CG7727	Appl	0.0698301	0.856161	0.847	0.782	1
FBgn0032151	CG4128	nAChRalpha6	0.0709574	0.871763	0.747	0.641	1
FBgn0000064	CG6058	Ald1	0.0737253	-0.455041	0.563	0.686	1
FBgn0040805	CG12355	CG12355	0.0740341	-0.0308323	0.083	0.109	1
FBgn0262614	CG43140	pyd	0.0771403	0.120562	0.178	0.142	1
FBgn0013576	CG32464	mtd	0.0795586	0.517002	0.676	0.557	1
FBgn0263353	CG11000	CG11000	0.0810268	0.0815686	0.43	0.414	1
FBgn0085412	CG34383	kmr	0.0820223	0.0444886	0.247	0.227	1
FBgn0031530	CG3254	Pgant2	0.0842965	0.0362896	0.11	0.089	1
FBgn0265597	CG44424	rad	0.0857219	0.194821	0.442	0.432	1
FBgn0033405	CG13954	CG13954	0.0858657	0.0206791	0.248	0.228	1
FBgn0037521	CG2993	CG2993	0.0869796	0.0759828	0.349	0.31	1
FBgn0035032	CG4692	ATPsynF	0.0871073	-0.663554	0.74	0.858	1
FBgn0035495	CG14989	CG14989	0.0877504	0.210071	0.434	0.378	1
FBgn0038063	CG33976	Octbeta2R	0.0895611	0.334467	0.523	0.429	1
FBgn0031294	CG31795	IA-2	0.0902236	2.9169	0.983	0.961	1
FBgn0263772	CG43689	CG43689	0.0905673	0.194396	0.191	0.172	1
FBgn0031835	CG11319	CG11319	0.0910658	0.182518	0.328	0.283	1
FBgn0264001	CG43744	bru3	0.0924466	0.548874	0.542	0.46	1
FBgn0032901	CG9339	sky	0.0932144	0.0661041	0.462	0.456	1
FBgn0053179	CG33179	beat-IIIb	0.0996043	-0.0727974	0.334	0.376	1
FBgn0000042	CG4027	Act5C	0.101305	-0.0495461	0.499	0.513	1
FBgn0086359	CG3953	Invadolysin	0.102219	0.0318758	0.107	0.085	1
FBgn0010452	CG11280	trn	0.104608	0.000464386	0.217	0.206	1
FBgn0028496	CG30116	CG30116	0.105388	-0.0630592	0.395	0.437	1
FBgn0259821	CG42402	CG42402	0.105401	0.29896	0.362	0.296	1
FBgn0264490	CG18389	Eip93F	0.106562	0.360775	0.35	0.27	1
FBgn0000116	CG32031	Argk	0.107075	0.0643634	0.719	0.74	1
FBgn0264606	CG43955	Fife	0.107633	0.129365	0.495	0.479	1
FBgn0037171	CG14459	CG14459	0.109384	0.0699874	0.173	0.137	1
FBgn0037956	CG6959	CG6959	0.109431	0.0376229	0.104	0.08	1
FBgn0030574	CG9413	sbm	0.111238	0.00260209	0.115	0.119	1
FBgn0261046	CG31190	Dscam3	0.1117	0.0482982	0.103	0.081	1
FBgn0038494	CG4135	beat-IIb	0.11423	0.0330569	0.108	0.088	1
FBgn0285944	CG9907	para	0.11687	1.55292	0.901	0.826	1
FBgn0259108	CG34387	futsch	0.116999	0.194102	0.863	0.841	1
FBgn0053147	CG33147	Hs3st-A	0.118305	0.480906	0.76	0.698	1
FBgn0043364	CG4427	cbt	0.118337	0.00370397	0.102	0.104	1
FBgn0260941	CG42318	app	0.120821	0.0616466	0.167	0.136	1
FBgn0036935	CG14186	CG14186	0.122091	0.0116889	0.152	0.142	1
FBgn0024321	CG8524	NK7.1	0.12234	0.0148228	0.186	0.181	1
FBgn0011656	CG1429	Mef2	0.125859	0.0917517	0.264	0.218	1
FBgn0010412	CG4464	RpS19a	0.125869	0.0824119	0.256	0.216	1
FBgn0022382	CG15862	Pka-R2	0.127792	0.154543	0.313	0.248	1
FBgn0030505	CG11172	NFAT	0.128673	0.0593462	0.263	0.228	1
FBgn0000024	CG17907	Ace	0.135805	0.555144	0.66	0.578	1
FBgn0085432	CG34403	pan	0.135828	1.17617	0.794	0.666	1
FBgn0005775	CG7503	Con	0.136416	0.56356	0.521	0.415	1
FBgn0038498	CG14334	beat-IIa	0.136501	0.155936	0.319	0.271	1
FBgn0263980	CG43729	Stacl	0.137004	-0.00913756	0.628	0.638	1
FBgn0085421	CG34392	Epac	0.137105	0.0926993	0.236	0.199	1
FBgn0033192	CG2105	Corin	0.142488	0.0390265	0.251	0.251	1
FBgn0038980	CG6919	Octbeta1R	0.144684	0.0440152	0.119	0.091	1
FBgn0263289	CG43398	scrib	0.147782	0.052176	0.162	0.129	1
FBgn0038282	CG33485	dpr9	0.161299	0.158594	0.415	0.369	1
FBgn0053202	CG33202	dpr11	0.165103	0.0675564	0.251	0.221	1
FBgn0032797	CG10186	Hasp	0.166224	-0.496808	0.786	0.858	1
FBgn0261113	CG17836	Xrp1	0.178639	0.0492541	0.185	0.158	1
FBgn0031897	CG13784	CG13784	0.179754	0.0678178	0.302	0.269	1
FBgn0000422	CG10697	Ddc	0.180375	0.215814	0.398	0.343	1
FBgn0052600	CG32600	dpr8	0.182335	0.0940208	0.424	0.43	1
FBgn0261788	CG42734	Ank2	0.184895	0.611617	0.758	0.661	1
FBgn0015609	CG7100	CadN	0.187109	0.220325	0.448	0.374	1
FBgn0259216	CG42316	RhoGAP102A	0.188956	0.00552606	0.097	0.106	1
FBgn0261871	CG33507	dpr2	0.189112	-0.0148923	0.137	0.162	1
FBgn0264087	CG43756	Slob	0.190761	0.057164	0.243	0.209	1
FBgn0267978	CG8376	ap	0.191222	0.0472777	0.176	0.153	1
FBgn0040532	CG8369	CG8369	0.193498	0.0316311	0.172	0.17	1
FBgn0085400	CG34371	side-V	0.194702	0.0439144	0.141	0.137	1
FBgn0029897	CG3203	RpL17	0.195343	-0.356901	0.587	0.723	1
FBgn0019650	CG11186	toy	0.200387	0.0388708	0.43	0.466	1
FBgn0051221	CG31221	CG31221	0.20258	2.65607	0.966	0.917	1
FBgn0086758	CG31666	chinmo	0.205544	0.520354	0.742	0.7	1
FBgn0261089	CG5559	Sytalpha	0.213086	0.043254	0.202	0.194	1
FBgn0259243	CG42341	Pka-R1	0.221186	0.0562874	0.207	0.177	1
FBgn0052017	CG32017	CG32017	0.224397	0.254904	0.411	0.32	1
FBgn0050089	CG30089	CG30089	0.224579	0.0263365	0.132	0.12	1
FBgn0035041	CG13594	CG13594	0.22825	-0.00286418	0.106	0.106	1
FBgn0010113	CG15532	hdc	0.229351	0.41238	0.435	0.337	1
FBgn0011582	CG9652	Dop1R1	0.230177	0.0226493	0.172	0.166	1
FBgn0260462	CG12163	CG12163	0.231461	-0.0196426	0.112	0.123	1
FBgn0033446	CG1648	CG1648	0.233787	-0.0246201	0.112	0.129	1
FBgn0033438	CG1794	Mmp2	0.235422	0.0275837	0.238	0.23	1
FBgn0083963	CG34127	Nlg3	0.236144	0.088022	0.562	0.577	1
FBgn0031424	CG9887	VGlut	0.240002	0.158389	0.183	0.148	1
FBgn0013467	CG18285	igl	0.252761	0.438003	0.522	0.411	1
FBgn0030174	CG15312	CG15312	0.259763	0.0476913	0.205	0.181	1
FBgn0052626	CG32626	AMPdeam	0.26121	0.0227181	0.13	0.11	1
FBgn0044328	CG32052	CG32052	0.261668	-0.0455509	0.159	0.184	1
FBgn0013981	CG3379	His4r	0.262516	-0.187218	0.941	0.964	1
FBgn0261549	CG42667	rdgA	0.26752	0.285133	0.421	0.378	1
FBgn0039089	CG10152	beat-IV	0.27667	0.0013007	0.154	0.146	1
FBgn0030723	CG14948	dpr18	0.280499	0.0176891	0.122	0.112	1
FBgn0027589	CG1688	CG1688	0.285276	0.0395583	0.192	0.172	1
FBgn0264006	CG43749	dysc	0.286323	0.497093	0.787	0.75	1
FBgn0267252	CG3694	Ggamma30A	0.297379	0.36517	0.979	0.978	1
FBgn0004880	CG1130	scrt	0.300069	0.426867	0.95	0.956	1
FBgn0261836	CG42768	Msp300	0.304328	0.519038	0.692	0.609	1
FBgn0004514	CG7485	Oct-TyrR	0.306632	-0.0249288	0.097	0.112	1
FBgn0261999	CG42817	Ca-Ma2d	0.311626	0.0247244	0.157	0.15	1
FBgn0033250	CG14762	CG14762	0.313225	0.129478	0.569	0.553	1
FBgn0031697	CG14024	CG14024	0.313273	0.0119183	0.143	0.144	1
FBgn0030432	CG4404	CG4404	0.318549	0.0293119	0.13	0.114	1
FBgn0016061	CG31062	side	0.321173	0.0269393	0.476	0.474	1
FBgn0262738	CG3620	norpA	0.327142	0.0498165	0.481	0.474	1
FBgn0261588	CG42698	pdm3	0.33769	0.0442509	0.128	0.117	1
FBgn0259242	CG42340	CG42340	0.339197	0.0255044	0.249	0.239	1
FBgn0052677	CG32677	X11Lbeta	0.341894	0.142082	0.365	0.312	1
FBgn0261244	CG33174	inaE	0.344475	0.0173665	0.396	0.395	1
FBgn0041094	CG7590	scyl	0.346313	0.198292	0.43	0.373	1
FBgn0265182	CG44247	CG44247	0.350828	0.00452707	0.122	0.117	1
FBgn0260657	CG42540	CG42540	0.356655	0.44796	0.742	0.707	1
FBgn0034138	CG8332	RpS15	0.360396	-0.428542	0.815	0.893	1
FBgn0053516	CG33516	dpr3	0.366193	0.0565147	0.155	0.137	1
FBgn0024963	CG7535	GluClalpha	0.377704	0.461405	0.765	0.662	1
FBgn0053143	CG33143	CG33143	0.387781	0.0319738	0.281	0.259	1
FBgn0053543	CG33543	CG33543	0.390711	0.110116	0.34	0.318	1
FBgn0266418	CG45058	wake	0.392093	0.0142764	0.113	0.103	1
FBgn0000037	CG4356	mAChR-A	0.401487	0.0643641	0.368	0.337	1
FBgn0023172	CG9635	RhoGEF2	0.405967	0.0226131	0.102	0.087	1
FBgn0039584	CG14064	beat-VI	0.415058	0.0627693	0.304	0.295	1
FBgn0260660	CG42543	Mp	0.431794	0.0297485	0.289	0.292	1
FBgn0014184	CG16747	Oda	0.43183	0.107105	0.596	0.575	1
FBgn0010114	CG2040	hig	0.43542	0.199464	0.577	0.556	1
FBgn0284243	CG9277	betaTub56D	0.438093	-0.129227	0.291	0.336	1
FBgn0032400	CG6770	CG6770	0.442274	0.148022	0.698	0.673	1
FBgn0285952	CG3186	eEF5	0.443764	0.0281732	0.268	0.246	1
FBgn0020907	CG14904	Scp2	0.449793	0.0106857	0.115	0.103	1
FBgn0000636	CG5803	Fas3	0.454784	0.0360727	0.202	0.19	1
FBgn0264503	CG43902	CG43902	0.458643	0.147655	0.315	0.275	1
FBgn0266851	CR45312	lncRNA:CR45312	0.462059	-0.0208327	0.229	0.239	1
FBgn0004858	CG4220	elB	0.469397	0.0354233	0.165	0.154	1
FBgn0028645	CG7644	beat-Ib	0.47023	0.167568	0.356	0.334	1
FBgn0034978	CG3257	CG3257	0.472281	0.00853344	0.153	0.158	1
FBgn0027608	CG2082	CG2082	0.478532	-0.0453736	0.329	0.343	1
FBgn0036165	CG7533	chrb	0.479132	0.356463	0.573	0.435	1
FBgn0033358	CG8216	spab	0.480528	-0.016843	0.121	0.124	1
FBgn0085414	CG34385	dpr12	0.491512	0.117106	0.42	0.387	1
FBgn0036844	CG14080	Mkp3	0.50105	0.22519	0.506	0.453	1
FBgn0053517	CG33517	Dop2R	0.50728	1.45583	0.975	0.961	1
FBgn0262782	CG5362	Mdh1	0.50951	-0.0373449	0.125	0.144	1
FBgn0030412	CG17762	Tomosyn	0.511179	0.205852	0.568	0.496	1
FBgn0052062	CG32062	Rbfox1	0.511267	0.78067	0.892	0.851	1
FBgn0030272	CG15201	CG15201	0.516275	0.00840483	0.14	0.147	1
FBgn0039054	CG13830	Cow	0.520211	0.224179	0.464	0.404	1
FBgn0000535	CG10952	eag	0.538687	0.11919	0.311	0.287	1
FBgn0036494	CG7250	Toll-6	0.54005	0.0523192	0.268	0.246	1
FBgn0000273	CG4379	Pka-C1	0.544068	0.365995	0.63	0.534	1
FBgn0003429	CG10693	slo	0.554224	0.557039	0.691	0.576	1
FBgn0013973	CG1470	Gycbeta100B	0.554396	-0.00360386	0.14	0.151	1
FBgn0262737	CG7437	mub	0.556155	0.969383	0.784	0.644	1
FBgn0039346	CG5079	CG5079	0.558347	-0.0139232	0.092	0.104	1
FBgn0261509	CG14351	haf	0.564767	0.0281134	0.163	0.148	1
FBgn0000659	CG10002	fkh	0.564787	0.0561289	0.117	0.106	1
FBgn0261258	CG6014	rgn	0.566093	0.0107643	0.318	0.313	1
FBgn0265296	CG42256	Dscam2	0.568894	0.395033	0.782	0.746	1
FBgn0267253	CG32700	CG32700	0.578393	0.0279973	0.256	0.24	1
FBgn0261928	CG42795	CG42795	0.579325	0.0640943	0.262	0.239	1
FBgn0264339	CG43795	CG43795	0.588325	-0.0300329	0.095	0.111	1
FBgn0052647	CG32647	CG32647	0.595494	0.0339461	0.258	0.255	1
FBgn0004509	CG10772	Fur1	0.602487	0.0497922	0.167	0.15	1
FBgn0003380	CG12348	Sh	0.625249	1.73026	0.958	0.905	1
FBgn0051619	CG31619	nolo	0.630279	0.0306279	0.177	0.169	1
FBgn0036043	CG8177	CG8177	0.634655	0.0361304	0.293	0.269	1
FBgn0004580	CG6702	Cbp53E	0.638363	0.565069	0.65	0.523	1
FBgn0036927	CG7433	Gabat	0.646646	0.00946361	0.219	0.218	1
FBgn0259171	CG42276	Pde9	0.648309	-0.0272674	0.534	0.55	1
FBgn0000097	CG3166	aop	0.652412	0.0231102	0.179	0.176	1
FBgn0250908	CG42242	beat-VII	0.652458	0.0872712	0.283	0.261	1
FBgn0051774	CG31774	fred	0.653952	0.0656098	0.25	0.235	1
FBgn0086677	CG30040	jeb	0.658369	0.204813	0.393	0.344	1
FBgn0285948	CG15442	RpL27A	0.659028	0.101417	0.702	0.736	1
FBgn0261597	CG10305	RpS26	0.659646	-0.260556	0.784	0.832	1
FBgn0051361	CG31361	dpr17	0.661098	0.0274057	0.195	0.192	1
FBgn0017590	CG6669	klg	0.670806	0.00102123	0.473	0.471	1
FBgn0023534	CG17778	CG17778	0.673405	0.0386087	0.198	0.186	1
FBgn0000028	CG9151	acj6	0.689484	0.0855673	0.134	0.123	1
FBgn0264273	CG33960	Sema2b	0.6945	0.0401694	0.154	0.142	1
FBgn0031414	CG33955	eys	0.695078	0.0762775	0.446	0.424	1
FBgn0037015	CG13253	cmpy	0.706331	0.0184454	0.218	0.217	1
FBgn0037913	CG6783	fabp	0.707094	-0.0202557	0.13	0.14	1
FBgn0085434	CG34405	NaCP60E	0.707239	0.435279	0.715	0.625	1
FBgn0261804	CG42750	CG42750	0.720187	0.10195	0.448	0.422	1
FBgn0002593	CG4087	RpLP1	0.733205	-0.406004	0.693	0.81	1
FBgn0261552	CG42670	ps	0.740561	0.100909	0.948	0.965	1
FBgn0263392	CG43444	Tet	0.746918	0.148217	0.671	0.663	1
FBgn0263773	CG43690	fok	0.748916	0.0169793	0.202	0.193	1
FBgn0010453	CG4698	Wnt4	0.764342	0.024602	0.122	0.116	1
FBgn0037525	CG17816	CG17816	0.769749	0.229139	0.505	0.441	1
FBgn0263930	CG4974	dally	0.776769	0.0177252	0.217	0.202	1
FBgn0264895	CG44086	RapGAP1	0.780819	0.188213	0.456	0.42	1
FBgn0000635	CG3665	Fas2	0.782937	0.0459958	0.163	0.15	1
FBgn0013433	CG4846	beat-Ia	0.783941	0.00535226	0.122	0.122	1
FBgn0003435	CG9218	sm	0.801925	0.957963	0.92	0.91	1
FBgn0000036	CG5610	nAChRalpha1	0.811216	0.158112	0.435	0.404	1
FBgn0031374	CG7337	Wdr62	0.811345	0.0750776	0.439	0.421	1
FBgn0038826	CG17838	Syp	0.818562	0.270372	0.499	0.417	1
FBgn0003274	CG4918	RpLP2	0.819042	-0.00927312	0.502	0.489	1
FBgn0037676	CG8861	CG8861	0.82261	0.0506403	0.293	0.287	1
FBgn0266137	CG18741	Dop1R2	0.828446	0.011301	0.124	0.118	1
FBgn0039420	CG6154	CG6154	0.828807	0.019897	0.119	0.115	1
FBgn0004595	CG17228	pros	0.830054	3.24458	0.961	0.916	1
FBgn0028370	CG4192	kek3	0.832066	0.0126385	0.152	0.151	1
FBgn0039647	CG14509	jus	0.841858	0.0662731	0.497	0.484	1
FBgn0038237	CG8279	Pde6	0.850718	0.214911	0.498	0.47	1
FBgn0029814	CG15765	CG15765	0.856985	0.176842	0.51	0.477	1
FBgn0265598	CG44425	Bx	0.857947	0.0267689	0.19	0.193	1
FBgn0263220	CG43388	Hk	0.8594	0.397055	0.773	0.741	1
FBgn0052183	CG32183	Ccn	0.861628	0.0249086	0.203	0.197	1
FBgn0039380	CG5890	CG5890	0.865131	0.0129104	0.268	0.276	1
FBgn0029939	CG9650	CG9650	0.873652	0.171639	0.26	0.251	1
FBgn0262869	CG43224	Gfrl	0.875693	0.205044	0.535	0.507	1
FBgn0085407	CG34378	Pvf3	0.906146	0.250974	0.424	0.375	1
FBgn0264386	CG15899	Ca-alpha1T	0.9072	0.767926	0.635	0.505	1
FBgn0264442	CG43860	ab	0.916141	-0.00111717	0.112	0.113	1
FBgn0263397	CG8585	Ih	0.926291	0.561288	0.876	0.8	1
FBgn0039617	CG14521	DIP-gamma	0.926594	0.00963115	0.106	0.099	1
FBgn0001235	CG17117	hth	0.967771	0.195324	0.341	0.271	1
FBgn0034286	CG33996	dpr13	0.972187	0.127063	0.4	0.384	1
FBgn0031770	CG13995	CG13995	0.974349	0.00234904	0.146	0.149	1
FBgn0028875	CG32975	nAChRalpha5	0.976204	0.637742	0.75	0.673	1
FBgn0033108	CG15236	CG15236	0.980789	0.0261711	0.23	0.226	1
FBgn0003423	CG1417	slgA	0.995287	0.115554	0.383	0.333	1
FBgn0027654	CG2239	jdp	0.997563	-0.0393331	0.607	0.658	1

## Sheet: Female_C7
FlyBaseID	GeneID	Gene symbol	p_val	avg_diff	pct.1	pct.2	p_val_adj
FBgn0019660	CR32665	lncRNA:roX2	5.82333e-167	-1.93626	0.002	0.757	8.735e-164
FBgn0085753	CR40596	28SrRNA-Psi:CR40596	4.23953e-45	0.194195	0.169	0.024	6.35929e-42
FBgn0013688	CR34096	mt:srRNA	5.03668e-31	0.0988934	0.118	0.027	7.55502e-28
FBgn0052057	CG32057	dpr10	3.06689e-16	0.155111	0.24	0.116	4.60034e-13
FBgn0058469	CR40469	lncRNA:CR40469	2.33548e-11	0.0908643	0.155	0.086	3.50323e-08
FBgn0004595	CG17228	pros	1.62773e-10	3.42475	0.995	0.995	2.4416e-07
FBgn0065099	CR33925	snRNA:7SK	4.31389e-09	3.87459	0.735	0.44	6.47083e-06
FBgn0052982	CG32982	CG32982	7.83026e-09	0.0876111	0.226	0.16	1.17454e-05
FBgn0003301	CG9533	rut	7.89823e-09	0.135306	0.266	0.166	1.18473e-05
FBgn0002940	CG4550	ninaE	1.37615e-08	-0.141812	0.06	0.121	2.06422e-05
FBgn0029768	CG16752	SPR	1.13667e-07	0.130862	0.176	0.089	0.000170501
FBgn0033356	CG8229	CG8229	4.5307e-07	-0.0629117	0.151	0.195	0.000679605
FBgn0036789	CG13702	AstC-R2	6.88406e-07	0.154541	0.178	0.096	0.00103261
FBgn0085399	CG34370	CG34370	9.84465e-07	0.075791	0.224	0.164	0.0014767
FBgn0000121	CG5962	Arr2	1.33038e-06	-0.0880906	0.051	0.103	0.00199557
FBgn0004652	CG14307	fru	1.87057e-06	0.299996	0.303	0.164	0.00280585
FBgn0038641	CG7708	ChT	2.11698e-06	0.078027	0.27	0.214	0.00317546
FBgn0085420	CG34391	DIP-delta	3.78207e-06	0.0625938	0.25	0.199	0.0056731
FBgn0051619	CG31619	nolo	4.55191e-06	0.073999	0.296	0.219	0.00682786
FBgn0004619	CG8442	GluRIA	5.66415e-06	0.153263	0.229	0.135	0.00849622
FBgn0053087	CG33087	LRP1	8.01699e-06	0.0403524	0.113	0.074	0.0120255
FBgn0261649	CG31247	tinc	1.62094e-05	0.0709818	0.161	0.105	0.024314
FBgn0038246	CG14853	CG14853	2.06928e-05	0.0645572	0.161	0.112	0.0310392
FBgn0001226	CG4466	Hsp27	2.95256e-05	-0.198094	0.106	0.165	0.0442884
FBgn0264753	CG44011	Rgk1	3.36727e-05	0.12394	0.199	0.135	0.0505091
FBgn0026411	CG11354	Lim1	3.71834e-05	0.25151	0.318	0.235	0.0557751
FBgn0262782	CG5362	Mdh1	4.3835e-05	-0.0147295	0.186	0.204	0.0657525
FBgn0052683	CG32683	CG32683	7.47577e-05	0.123492	0.188	0.129	0.112137
FBgn0033987	CG12424	ckn	0.000101044	0.0996962	0.176	0.099	0.151566
FBgn0265052	CG44167	St3	0.000107402	0.0994915	0.172	0.103	0.161103
FBgn0036821	CG3961	CG3961	0.000187972	0.0680604	0.207	0.152	0.281958
FBgn0027339	CG11352	jim	0.000197541	2.26929	0.985	0.971	0.296311
FBgn0014859	CG1864	Hr38	0.00023178	-0.362836	0.31	0.346	0.347671
FBgn0002868	CG9470	MtnA	0.000246773	0.193881	0.251	0.134	0.370159
FBgn0284243	CG9277	betaTub56D	0.000264358	-0.404299	0.464	0.558	0.396538
FBgn0051163	CG31163	SKIP	0.000267045	0.182217	0.374	0.279	0.400568
FBgn0039349	CG4685	Ssadh	0.00034363	-0.123384	0.18	0.259	0.515445
FBgn0023095	CG11282	caps	0.000377144	0.0916003	0.161	0.088	0.565716
FBgn0267322	CR45758	lncRNA:CR45758	0.000450737	0.0478567	0.188	0.16	0.676106
FBgn0010113	CG15532	hdc	0.000640457	0.792941	0.694	0.615	0.960685
FBgn0052521	CG32521	CG32521	0.000698663	0.0697533	0.16	0.107	1
FBgn0031770	CG13995	CG13995	0.000732081	-0.0558729	0.135	0.176	1
FBgn0033544	CG7220	CG7220	0.000842497	-0.069596	0.217	0.266	1
FBgn0051690	CG31690	CG31690	0.00095244	0.0681218	0.277	0.231	1
FBgn0037525	CG17816	CG17816	0.00104353	0.136317	0.526	0.528	1
FBgn0037913	CG6783	fabp	0.00132381	-0.0914656	0.135	0.196	1
FBgn0042696	CG2380	NfI	0.0013561	0.125174	0.209	0.117	1
FBgn0033249	CG11191	CG11191	0.00136149	-0.0259634	0.121	0.139	1
FBgn0024944	CG3856	Oamb	0.00136935	0.0485755	0.107	0.071	1
FBgn0052206	CG32206	CG32206	0.00140023	0.140409	0.289	0.192	1
FBgn0001234	CR31400	lncRNA:Hsromega	0.00142707	1.06149	0.98	0.992	1
FBgn0028888	CG4168	CG4168	0.00142972	0.0339225	0.139	0.112	1
FBgn0001085	CG17697	fz	0.00147722	0.089221	0.176	0.116	1
FBgn0265595	CG44422	CG44422	0.00151049	0.230631	0.295	0.19	1
FBgn0004242	CG3139	Syt1	0.00160625	0.797755	0.873	0.848	1
FBgn0264794	CR44024	lncRNA:CR44024	0.00213515	0.152196	0.374	0.321	1
FBgn0037171	CG14459	CG14459	0.0021539	0.170159	0.297	0.222	1
FBgn0013995	CG5685	Calx	0.00238097	0.201103	0.261	0.187	1
FBgn0000547	CG12676	ed	0.00283369	0.0896585	0.202	0.143	1
FBgn0011661	CG10701	Moe	0.00284776	-0.0478988	0.137	0.184	1
FBgn0001225	CG4183	Hsp26	0.0029344	-0.22548	0.158	0.221	1
FBgn0030090	CG12664	fend	0.00298175	-0.0919053	0.459	0.526	1
FBgn0263397	CG8585	Ih	0.00312054	0.711672	0.895	0.847	1
FBgn0003165	CG9755	pum	0.00325969	0.973567	0.815	0.644	1
FBgn0260442	CG6831	rhea	0.00338339	0.0358535	0.109	0.076	1
FBgn0001224	CG4463	Hsp23	0.00354491	-0.0749915	0.109	0.151	1
FBgn0013973	CG1470	Gycbeta100B	0.00355423	0.0886014	0.198	0.142	1
FBgn0261648	CG6464	salm	0.00370241	0.0888945	0.15	0.103	1
FBgn0032833	CG10664	COX4	0.00390604	-1.37632	0.849	0.953	1
FBgn0264442	CG43860	ab	0.00425609	-0.139142	0.295	0.342	1
FBgn0267910	CR34335	lncRNA:CR34335	0.00433469	4.78658	0.981	0.864	1
FBgn0261285	CG5629	Ppcs	0.00455054	0.04411	0.134	0.096	1
FBgn0031897	CG13784	CG13784	0.00455116	0.0504526	0.276	0.25	1
FBgn0286778	CG46385	CG46385	0.00472175	0.165344	0.332	0.233	1
FBgn0085391	CG34362	trv	0.00493305	0.829142	0.697	0.567	1
FBgn0029663	CG10804	CG10804	0.005019	0.0546466	0.212	0.157	1
FBgn0262636	CG2052	dati	0.00520925	0.361417	0.514	0.432	1
FBgn0259234	CG42332	Camta	0.00521139	0.104678	0.31	0.246	1
FBgn0031299	CG4629	CG4629	0.00530093	0.0459526	0.132	0.093	1
FBgn0004168	CG16720	5-HT1A	0.00536357	0.10253	0.246	0.182	1
FBgn0264308	CG43778	CG43778	0.00546186	0.0573923	0.291	0.259	1
FBgn0033403	CG13739	CG13739	0.00570202	0.175807	0.185	0.109	1
FBgn0052066	CG32066	CG32066	0.00582102	-0.00092888	0.134	0.129	1
FBgn0262508	CG43078	CG43078	0.00602501	-0.043721	0.127	0.162	1
FBgn0267001	CG42338	Ten-a	0.00788135	1.4794	0.88	0.796	1
FBgn0000635	CG3665	Fas2	0.00832568	0.112275	0.21	0.143	1
FBgn0283499	CG18402	InR	0.00833829	0.0349634	0.218	0.196	1
FBgn0262473	CG5490	Tl	0.00909583	0.0744182	0.148	0.097	1
FBgn0261260	CG42611	mgl	0.00911785	0.0532296	0.134	0.108	1
FBgn0085397	CG34368	Fili	0.00921085	0.0290636	0.102	0.074	1
FBgn0033368	CG13743	CG13743	0.00925766	0.0443815	0.172	0.141	1
FBgn0041605	CG32490	cpx	0.010215	-0.0694387	0.985	0.985	1
FBgn0260658	CG42541	CG42541	0.0103082	-0.0907372	0.368	0.369	1
FBgn0040823	CG14162	dpr6	0.0111561	-0.0441563	0.305	0.337	1
FBgn0001186	CG3001	Hex-A	0.0116035	0.541207	0.623	0.411	1
FBgn0259241	CG42339	CG42339	0.0117251	0.0471423	0.103	0.074	1
FBgn0024189	CG33141	sns	0.0122972	0.0233308	0.129	0.105	1
FBgn0260971	CG42594	CG42594	0.0124138	0.116802	0.276	0.216	1
FBgn0040805	CG12355	CG12355	0.0125683	-0.0631164	0.151	0.206	1
FBgn0283651	CG46301	CG46301	0.0126264	0.0824979	0.187	0.155	1
FBgn0263994	CG43737	CG43737	0.012761	0.348696	0.599	0.48	1
FBgn0029897	CG3203	RpL17	0.0127738	-0.582253	0.721	0.82	1
FBgn0034636	CG10440	twz	0.0130895	0.00474893	0.122	0.095	1
FBgn0261046	CG31190	Dscam3	0.0141085	0.0428104	0.236	0.205	1
FBgn0036144	CG6207	GlcAT-P	0.0148123	-0.00960454	0.274	0.265	1
FBgn0259170	CG42275	alpha-Man-Ia	0.0151257	0.112933	0.227	0.16	1
FBgn0267252	CG3694	Ggamma30A	0.0152626	0.213405	0.914	0.922	1
FBgn0052264	CG32264	CG32264	0.0154369	0.480032	0.727	0.66	1
FBgn0041097	CG5423	robo3	0.0156495	0.0157554	0.152	0.142	1
FBgn0039054	CG13830	Cow	0.0159553	0.0649774	0.565	0.52	1
FBgn0015519	CG2302	nAChRalpha3	0.0160207	0.200251	0.399	0.302	1
FBgn0028704	CG18660	Nckx30C	0.0165894	0.401814	0.79	0.77	1
FBgn0243512	CG7850	puc	0.0169336	-0.0493546	0.078	0.11	1
FBgn0264895	CG44086	RapGAP1	0.017326	0.168284	0.396	0.349	1
FBgn0004607	CG1449	zfh2	0.0174149	0.065138	0.112	0.071	1
FBgn0027356	CG8604	Amph	0.0175953	0.0573632	0.143	0.099	1
FBgn0000422	CG10697	Ddc	0.0177604	0.176578	0.298	0.234	1
FBgn0264090	CG43759	CG43759	0.0191774	0.0920658	0.222	0.165	1
FBgn0051324	CG31324	CG31324	0.0196644	0.0930734	0.286	0.229	1
FBgn0001091	CG12055	Gapdh1	0.0204546	-0.235899	0.354	0.474	1
FBgn0041094	CG7590	scyl	0.020469	0.173015	0.454	0.363	1
FBgn0003360	CG16944	sesB	0.0214202	-0.458882	0.873	0.929	1
FBgn0083228	CG5907	Frq2	0.0218487	0.232441	0.394	0.306	1
FBgn0002643	CG8118	mam	0.0219198	0.113542	0.235	0.174	1
FBgn0051092	CG31092	LpR2	0.0231445	0.0438276	0.121	0.082	1
FBgn0261574	CG7749	kug	0.0278262	0.0418804	0.189	0.159	1
FBgn0003091	CG6622	Pkc53E	0.0297944	0.145026	0.422	0.395	1
FBgn0030913	CG6123	CG6123	0.0298304	0.0528535	0.172	0.132	1
FBgn0052698	CG32698	CARPB	0.029837	0.0853363	0.129	0.085	1
FBgn0040765	CG33473	luna	0.0299045	0.117483	0.3	0.241	1
FBgn0031736	CG11030	CG11030	0.0312277	0.136929	0.389	0.342	1
FBgn0030574	CG9413	sbm	0.0323378	0.058055	0.16	0.109	1
FBgn0085382	CG34353	CG34353	0.0324788	0.066124	0.246	0.196	1
FBgn0285944	CG9907	para	0.0325635	1.4781	0.924	0.848	1
FBgn0261804	CG42750	CG42750	0.0332389	0.0365485	0.44	0.385	1
FBgn0026160	CG7958	tna	0.0339554	0.228855	0.37	0.266	1
FBgn0027589	CG1688	CG1688	0.0348738	-0.0589494	0.142	0.181	1
FBgn0022382	CG15862	Pka-R2	0.0353542	0.0384117	0.305	0.297	1
FBgn0259212	CG42312	cno	0.0358621	0.0660733	0.142	0.097	1
FBgn0000303	CG12345	ChAT	0.0371769	-0.10683	0.441	0.489	1
FBgn0003499	CG7847	sr	0.0376041	0.0731456	0.134	0.095	1
FBgn0035170	CG12191	dpr20	0.0382834	-0.0366822	0.116	0.15	1
FBgn0085390	CG34361	Dgk	0.0383471	0.0557641	0.153	0.115	1
FBgn0011582	CG9652	Dop1R1	0.0399893	-0.0517996	0.175	0.205	1
FBgn0260429	CG42524	CG42524	0.0401005	0.0564063	0.203	0.166	1
FBgn0031306	CG4577	CG4577	0.0406239	0.0886951	0.13	0.077	1
FBgn0010313	CG2530	corto	0.0411119	-0.0445324	0.358	0.395	1
FBgn0004880	CG1130	scrt	0.0412625	0.275384	0.943	0.937	1
FBgn0259213	CG42313	side-II	0.041303	-0.112043	0.349	0.402	1
FBgn0086680	CG10037	vvl	0.0424587	0.131201	0.224	0.171	1
FBgn0261552	CG42670	ps	0.0445981	0.11399	0.955	0.96	1
FBgn0015774	CG10521	NetB	0.0446407	0.066041	0.232	0.192	1
FBgn0264339	CG43795	CG43795	0.0453695	0.0244494	0.168	0.163	1
FBgn0005636	CG3385	nvy	0.0456031	-0.0433115	0.122	0.15	1
FBgn0052647	CG32647	CG32647	0.0459514	-0.0556498	0.322	0.353	1
FBgn0259677	CG42346	CG42346	0.0459937	0.0550173	0.169	0.137	1
FBgn0001078	CG4059	ftz-f1	0.0479015	0.0820012	0.37	0.336	1
FBgn0000064	CG6058	Ald1	0.0491763	-0.531311	0.618	0.732	1
FBgn0013467	CG18285	igl	0.049831	0.782124	0.666	0.578	1
FBgn0263930	CG4974	dally	0.0502689	-0.0539408	0.24	0.265	1
FBgn0030897	CG5744	Frq1	0.0515234	0.693709	0.689	0.57	1
FBgn0267579	CR45919	lncRNA:CR45919	0.0528107	0.0380227	0.103	0.071	1
FBgn0036935	CG14186	CG14186	0.0549828	0.0531024	0.157	0.112	1
FBgn0015777	CG9261	nrv2	0.0550507	0.0435345	0.14	0.11	1
FBgn0285952	CG3186	eEF5	0.055309	-0.0214634	0.268	0.294	1
FBgn0029814	CG15765	CG15765	0.0563252	0.0115388	0.541	0.523	1
FBgn0019662	CG8593	qm	0.0565566	0.00565626	0.134	0.133	1
FBgn0031530	CG3254	Pgant2	0.0583003	0.0218147	0.122	0.101	1
FBgn0050463	CG30463	Pgant9	0.0618282	0.0888783	0.229	0.174	1
FBgn0033405	CG13954	CG13954	0.0650955	0.0552113	0.217	0.194	1
FBgn0039089	CG10152	beat-IV	0.0671413	-0.0668287	0.237	0.284	1
FBgn0259108	CG34387	futsch	0.0672761	0.665524	0.959	0.948	1
FBgn0266137	CG18741	Dop1R2	0.0675253	0.0429257	0.101	0.085	1
FBgn0263980	CG43729	Stacl	0.0679386	-0.360801	0.52	0.559	1
FBgn0000179	CG3578	bi	0.068289	0.169688	0.23	0.184	1
FBgn0015399	CG12283	kek1	0.0719792	0.162148	0.48	0.42	1
FBgn0259242	CG42340	CG42340	0.0727169	-0.00921768	0.198	0.22	1
FBgn0052204	CG32204	CG32204	0.0737996	0.0340884	0.108	0.09	1
FBgn0250869	CG42240	CG42240	0.0739999	0.0349128	0.107	0.079	1
FBgn0039380	CG5890	CG5890	0.0742637	0.024361	0.242	0.235	1
FBgn0016797	CG9739	fz2	0.0760642	0.0622393	0.237	0.198	1
FBgn0085414	CG34385	dpr12	0.0778699	-0.0546207	0.306	0.342	1
FBgn0038087	CG10134	beat-Va	0.078715	-0.0103966	0.19	0.206	1
FBgn0031971	CG7224	Sirup	0.0795173	-0.0141875	0.147	0.16	1
FBgn0259111	CG42253	Ndae1	0.07977	0.025694	0.158	0.135	1
FBgn0000636	CG5803	Fas3	0.080921	0.077999	0.193	0.149	1
FBgn0264386	CG15899	Ca-alpha1T	0.0814319	0.292865	0.376	0.307	1
FBgn0033108	CG15236	CG15236	0.0819391	-0.00160345	0.17	0.187	1
FBgn0260003	CG34157	Dys	0.0821348	0.056666	0.151	0.104	1
FBgn0053143	CG33143	CG33143	0.0828248	-0.0493309	0.272	0.307	1
FBgn0036927	CG7433	Gabat	0.0842688	-0.0763298	0.293	0.339	1
FBgn0032151	CG4128	nAChRalpha6	0.085166	0.678045	0.724	0.627	1
FBgn0261555	CG42673	CG42673	0.0855827	-0.0294828	0.114	0.139	1
FBgn0010452	CG11280	trn	0.0900682	0.0605841	0.152	0.125	1
FBgn0033196	CG1358	CG1358	0.0928487	0.015722	0.118	0.101	1
FBgn0013733	CG18076	shot	0.0961684	0.135285	0.31	0.238	1
FBgn0085400	CG34371	side-V	0.0992475	-0.0198869	0.175	0.198	1
FBgn0033446	CG1648	CG1648	0.101508	-0.0826272	0.274	0.321	1
FBgn0003274	CG4918	RpLP2	0.103271	-0.161369	0.562	0.632	1
FBgn0265002	CG44153	CG44153	0.105533	-0.0325647	0.15	0.173	1
FBgn0250867	CG42238	CG42238	0.106874	0.0666714	0.215	0.174	1
FBgn0260660	CG42543	Mp	0.108113	0.0938708	0.301	0.25	1
FBgn0036494	CG7250	Toll-6	0.110557	0.0852716	0.374	0.324	1
FBgn0263257	CG43395	Cngl	0.11692	0.695424	0.683	0.565	1
FBgn0262018	CG42829	CadN2	0.118946	0.00741057	0.142	0.137	1
FBgn0259245	CG42343	DIP-beta	0.119842	0.0344041	0.118	0.099	1
FBgn0085395	CG34366	Shawl	0.120824	0.0258653	0.126	0.104	1
FBgn0020269	CG10145	mspo	0.121023	0.0255119	0.208	0.198	1
FBgn0085412	CG34383	kmr	0.122076	0.066235	0.299	0.26	1
FBgn0263995	CG43738	cpo	0.123156	0.311041	0.822	0.847	1
FBgn0051345	CG31345	CG31345	0.124129	-0.0358513	0.179	0.195	1
FBgn0086604	CG12484	side-VIII	0.124911	0.102043	0.236	0.189	1
FBgn0044328	CG32052	CG32052	0.125693	-0.0472457	0.147	0.171	1
FBgn0261871	CG33507	dpr2	0.12649	0.032041	0.134	0.111	1
FBgn0260657	CG42540	CG42540	0.127803	0.241676	0.62	0.59	1
FBgn0010114	CG2040	hig	0.130224	0.0803244	0.59	0.559	1
FBgn0004198	CG11387	ct	0.131077	0.165034	0.172	0.117	1
FBgn0264001	CG43744	bru3	0.133342	0.303679	0.458	0.379	1
FBgn0038980	CG6919	Octbeta1R	0.135025	-0.0668126	0.129	0.142	1
FBgn0025525	CG9102	bab2	0.136959	0.0378955	0.111	0.084	1
FBgn0265598	CG44425	Bx	0.13718	0.0391638	0.173	0.178	1
FBgn0035756	CG32381	unc-13-4A	0.138157	0.0468998	0.204	0.18	1
FBgn0053516	CG33516	dpr3	0.138363	0.0297942	0.107	0.1	1
FBgn0024963	CG7535	GluClalpha	0.13976	0.35161	0.705	0.647	1
FBgn0001235	CG17117	hth	0.140064	0.204227	0.553	0.528	1
FBgn0004395	CG4620	unk	0.140376	0.0663999	0.154	0.112	1
FBgn0083975	CG34139	Nlg4	0.14259	0.0566164	0.178	0.14	1
FBgn0011818	CG9884	oaf	0.147027	0.0325561	0.171	0.151	1
FBgn0037676	CG8861	CG8861	0.147593	0.125133	0.37	0.367	1
FBgn0053517	CG33517	Dop2R	0.148626	1.06524	0.788	0.769	1
FBgn0010411	CG8900	RpS18	0.151138	-0.539794	0.858	0.93	1
FBgn0003326	CG17579	sca	0.156608	-0.0169601	0.094	0.115	1
FBgn0085413	CG34384	CG34384	0.157383	0.0935324	0.254	0.199	1
FBgn0052432	CG32432	CG32432	0.157534	0.0686811	0.33	0.27	1
FBgn0004369	CG11516	Ptp99A	0.158354	0.317907	0.571	0.507	1
FBgn0034978	CG3257	CG3257	0.158764	-0.00653988	0.151	0.157	1
FBgn0003435	CG9218	sm	0.160888	0.690804	0.889	0.869	1
FBgn0265597	CG44424	rad	0.161422	0.106593	0.26	0.231	1
FBgn0034138	CG8332	RpS15	0.163366	-0.531167	0.853	0.921	1
FBgn0029123	CG18024	SoxN	0.163886	0.0887232	0.139	0.103	1
FBgn0031738	CG9171	CG9171	0.166426	0.0183341	0.151	0.14	1
FBgn0039064	CG4467	CG4467	0.171569	0.272572	0.501	0.392	1
FBgn0030505	CG11172	NFAT	0.171572	-0.0113039	0.223	0.216	1
FBgn0005775	CG7503	Con	0.177016	0.242208	0.349	0.284	1
FBgn0011224	CG31000	heph	0.1831	0.260465	0.379	0.328	1
FBgn0039647	CG14509	jus	0.183189	-0.155392	0.612	0.607	1
FBgn0263773	CG43690	fok	0.186926	0.066555	0.18	0.133	1
FBgn0034286	CG33996	dpr13	0.187644	0.190485	0.394	0.337	1
FBgn0264490	CG18389	Eip93F	0.18793	0.182891	0.237	0.181	1
FBgn0085384	CG34355	CG34355	0.191399	0.073179	0.186	0.143	1
FBgn0039209	CG13624	REPTOR	0.193867	0.0329602	0.211	0.199	1
FBgn0262509	CG43079	nrm	0.196846	-0.0095054	0.203	0.218	1
FBgn0038839	CG10830	Ktl	0.201775	0.00178341	0.213	0.214	1
FBgn0267668	CR46006	lncRNA:CR46006	0.203779	0.00913686	0.112	0.11	1
FBgn0052506	CG32506	CG32506	0.204525	0.0586865	0.218	0.195	1
FBgn0264273	CG33960	Sema2b	0.206377	0.0947501	0.241	0.199	1
FBgn0000037	CG4356	mAChR-A	0.209486	0.073319	0.405	0.373	1
FBgn0035050	CG4871	SiaT	0.212019	0.058874	0.104	0.081	1
FBgn0250910	CG42244	Octbeta3R	0.21323	0.0494947	0.193	0.157	1
FBgn0261999	CG42817	Ca-Ma2d	0.213365	-0.00380604	0.158	0.165	1
FBgn0016061	CG31062	side	0.213432	0.037694	0.407	0.37	1
FBgn0259821	CG42402	CG42402	0.214035	0.149325	0.341	0.265	1
FBgn0019643	CG3318	AANAT1	0.216831	-0.0331843	0.178	0.207	1
FBgn0261556	CG42674	CG42674	0.217335	-0.0629764	0.28	0.309	1
FBgn0031632	CG15628	CG15628	0.217483	-0.223387	0.65	0.698	1
FBgn0085434	CG34405	NaCP60E	0.218723	0.404806	0.727	0.691	1
FBgn0033268	CG2297	Obp44a	0.220048	0.0183847	0.142	0.172	1
FBgn0040397	CG3655	CG3655	0.226862	0.0182899	0.144	0.134	1
FBgn0034753	CG2852	CG2852	0.227794	-0.236164	0.412	0.506	1
FBgn0004449	CG5723	Ten-m	0.229502	0.193883	0.443	0.384	1
FBgn0085426	CG34397	Rgk3	0.231161	0.0511876	0.116	0.093	1
FBgn0260943	CG32169	Rbp6	0.231274	0.811122	0.862	0.818	1
FBgn0284245	CG8280	eEF1alpha1	0.233069	-0.00783945	0.266	0.271	1
FBgn0010300	CG10719	brat	0.233494	0.133779	0.272	0.197	1
FBgn0259243	CG42341	Pka-R1	0.236963	-0.0149558	0.262	0.265	1
FBgn0014184	CG16747	Oda	0.237298	0.147691	0.683	0.668	1
FBgn0264908	CG44099	pHCl-1	0.238005	0.0876402	0.352	0.334	1
FBgn0052017	CG32017	CG32017	0.242888	0.110903	0.301	0.243	1
FBgn0003429	CG10693	slo	0.243523	0.428113	0.689	0.633	1
FBgn0261244	CG33174	inaE	0.244544	0.0146627	0.479	0.488	1
FBgn0000535	CG10952	eag	0.244952	0.121711	0.387	0.333	1
FBgn0261988	CG17998	Gprk2	0.247469	0.185847	0.424	0.334	1
FBgn0027654	CG2239	jdp	0.248057	-0.137893	0.494	0.518	1
FBgn0264006	CG43749	dysc	0.248081	0.281659	0.766	0.748	1
FBgn0053543	CG33543	CG33543	0.259528	-0.0349806	0.319	0.349	1
FBgn0051646	CG31646	DIP-theta	0.260144	0.0912523	0.15	0.123	1
FBgn0013576	CG32464	mtd	0.261508	0.382852	0.714	0.633	1
FBgn0010473	CG15427	tutl	0.262058	0.343509	0.714	0.675	1
FBgn0037153	CG12673	olf413	0.27141	0.0956854	0.284	0.246	1
FBgn0023179	CG6438	amon	0.277166	0.083041	0.319	0.262	1
FBgn0051814	CG31814	DIP-kappa	0.27976	0.032777	0.116	0.1	1
FBgn0029824	CG3726	CG3726	0.283181	0.0703234	0.145	0.117	1
FBgn0014163	CG4609	fax	0.284673	0.327096	0.496	0.377	1
FBgn0039584	CG14064	beat-VI	0.288482	-0.0152436	0.225	0.245	1
FBgn0263289	CG43398	scrib	0.289573	-0.0123114	0.159	0.172	1
FBgn0032400	CG6770	CG6770	0.29119	0.197873	0.732	0.686	1
FBgn0002945	CG11614	nkd	0.29147	0.0508233	0.264	0.225	1
FBgn0262614	CG43140	pyd	0.291911	0.0948449	0.294	0.263	1
FBgn0261258	CG6014	rgn	0.292362	0.064443	0.341	0.315	1
FBgn0028645	CG7644	beat-Ib	0.298035	0.094263	0.262	0.208	1
FBgn0085421	CG34392	Epac	0.298976	0.0144386	0.168	0.155	1
FBgn0019985	CG11144	mGluR	0.300237	0.0127123	0.184	0.176	1
FBgn0264574	CG43946	Glut1	0.303425	0.170923	0.392	0.312	1
FBgn0085447	CG34418	sif	0.30513	0.725377	0.715	0.536	1
FBgn0032901	CG9339	sky	0.309712	0.0193104	0.415	0.407	1
FBgn0032629	CG15138	beat-IIIc	0.311826	0.410857	0.434	0.375	1
FBgn0000659	CG10002	fkh	0.315245	0.102387	0.25	0.237	1
FBgn0033791	CG3915	Drl-2	0.315825	0.0398438	0.163	0.144	1
FBgn0085380	CG34351	CG34351	0.317046	0.0352339	0.126	0.099	1
FBgn0038826	CG17838	Syp	0.318744	0.328787	0.631	0.572	1
FBgn0004910	CG15855	Eip63F-1	0.3189	0.0566994	0.159	0.131	1
FBgn0066084	CG30425	RpL41	0.326612	1.42255	0.853	0.582	1
FBgn0028481	CG4341	CG4341	0.32796	0.098762	0.257	0.208	1
FBgn0035041	CG13594	CG13594	0.329184	0.00168858	0.113	0.125	1
FBgn0263706	CG43658	CG43658	0.331953	0.0283061	0.155	0.143	1
FBgn0000287	CG4881	salr	0.332609	0.11859	0.225	0.196	1
FBgn0031294	CG31795	IA-2	0.336558	1.4458	0.929	0.851	1
FBgn0011666	CG5099	msi	0.337086	0.321678	0.472	0.333	1
FBgn0037874	CG4800	Tctp	0.338835	0.00580712	0.32	0.328	1
FBgn0010434	CG11949	cora	0.339296	0.0275033	0.128	0.108	1
FBgn0000028	CG9151	acj6	0.342935	0.210988	0.311	0.301	1
FBgn0053126	CG33126	NLaz	0.346269	0.0257877	0.104	0.084	1
FBgn0033484	CG2269	CG2269	0.348692	-0.10274	0.404	0.456	1
FBgn0019650	CG11186	toy	0.348787	-0.0437522	0.278	0.304	1
FBgn0260793	CG42573	2mit	0.351538	-0.00745259	0.188	0.195	1
FBgn0259244	CG42342	CG42342	0.358743	-0.0727803	0.423	0.468	1
FBgn0000116	CG32031	Argk	0.361836	0.137668	0.767	0.803	1
FBgn0267033	CG45477	mamo	0.365738	0.432393	0.327	0.258	1
FBgn0262737	CG7437	mub	0.368296	0.477838	0.625	0.556	1
FBgn0017590	CG6669	klg	0.369059	-0.171001	0.448	0.495	1
FBgn0263353	CG11000	CG11000	0.369405	0.00701509	0.454	0.459	1
FBgn0266871	CR45332	lncRNA:CR45332	0.370592	0.0392684	0.164	0.16	1
FBgn0013686	CR34094	mt:lrRNA	0.383801	7.25376	0.851	0.549	1
FBgn0015400	CG4977	kek2	0.389095	-0.00425216	0.368	0.376	1
FBgn0261597	CG10305	RpS26	0.39892	-0.36045	0.781	0.843	1
FBgn0033159	CG17800	Dscam1	0.399904	0.038388	0.108	0.086	1
FBgn0040726	CG13439	dpr1	0.405615	0.124772	0.329	0.299	1
FBgn0051760	CG31760	CG31760	0.407447	0.0163362	0.109	0.102	1
FBgn0036844	CG14080	Mkp3	0.411297	0.0347166	0.448	0.44	1
FBgn0264087	CG43756	Slob	0.411675	-0.00259375	0.223	0.234	1
FBgn0037941	CG12594	CG12594	0.411695	0.020542	0.121	0.111	1
FBgn0000097	CG3166	aop	0.413631	0.0222468	0.209	0.184	1
FBgn0083949	CG34113	side-III	0.416364	0.00820583	0.446	0.474	1
FBgn0032797	CG10186	Hasp	0.423504	-0.470943	0.827	0.881	1
FBgn0052677	CG32677	X11Lbeta	0.426471	0.119337	0.411	0.348	1
FBgn0085387	CG34358	shakB	0.429554	0.21752	0.587	0.556	1
FBgn0000575	CG1007	emc	0.438599	0.0962954	0.419	0.391	1
FBgn0020907	CG14904	Scp2	0.43991	0.000676725	0.164	0.15	1
FBgn0266851	CR45312	lncRNA:CR45312	0.442624	-0.0231024	0.117	0.125	1
FBgn0034731	CG10384	CG10384	0.455581	-0.00335237	0.156	0.162	1
FBgn0036801	CG6896	MYPT-75D	0.466291	0.074707	0.269	0.237	1
FBgn0000633	CG17716	CG17716	0.467039	0.110188	0.503	0.493	1
FBgn0004509	CG10772	Fur1	0.467653	0.0237188	0.193	0.179	1
FBgn0083963	CG34127	Nlg3	0.473897	0.0203308	0.545	0.53	1
FBgn0050419	CG30419	CG30419	0.47698	0.0309235	0.164	0.151	1
FBgn0003423	CG1417	slgA	0.479452	0.11427	0.488	0.465	1
FBgn0036454	CG17839	CG17839	0.481879	0.0219364	0.129	0.118	1
FBgn0028369	CG3653	kirre	0.482339	0.16992	0.325	0.244	1
FBgn0266100	CG44837	CG44837	0.496011	0.0327824	0.111	0.093	1
FBgn0004580	CG6702	Cbp53E	0.502154	0.543381	0.578	0.477	1
FBgn0265379	CR44320	lncRNA:CR44320	0.503106	0.0174041	0.101	0.088	1
FBgn0028875	CG32975	nAChRalpha5	0.50746	0.516523	0.743	0.718	1
FBgn0032666	CG5758	CG5758	0.509806	0.056888	0.23	0.195	1
FBgn0013954	CG11001	Fkbp12	0.510371	-0.135495	0.413	0.468	1
FBgn0035816	CG13685	CG13685	0.512049	0.00618212	0.155	0.152	1
FBgn0053179	CG33179	beat-IIIb	0.517273	-0.0414332	0.347	0.365	1
FBgn0038321	CG6218	CG6218	0.518537	-0.0116476	0.127	0.135	1
FBgn0265296	CG42256	Dscam2	0.521933	0.188833	0.751	0.746	1
FBgn0035032	CG4692	ATPsynF	0.527908	-0.881658	0.852	0.936	1
FBgn0031424	CG9887	VGlut	0.528291	0.0428546	0.133	0.129	1
FBgn0263392	CG43444	Tet	0.528631	0.0805809	0.505	0.474	1
FBgn0028407	CG8364	Drep3	0.529955	0.011583	0.119	0.118	1
FBgn0015609	CG7100	CadN	0.530222	0.173674	0.472	0.384	1
FBgn0259789	CG12701	zld	0.531214	0.0732404	0.223	0.198	1
FBgn0011656	CG1429	Mef2	0.532025	0.029319	0.209	0.204	1
FBgn0260462	CG12163	CG12163	0.533155	-0.0120625	0.149	0.155	1
FBgn0033250	CG14762	CG14762	0.535945	0.0324537	0.463	0.432	1
FBgn0051361	CG31361	dpr17	0.536421	0.0153071	0.139	0.119	1
FBgn0261262	CG42613	CG42613	0.539068	0.366175	0.51	0.361	1
FBgn0000024	CG17907	Ace	0.540805	0.383628	0.665	0.617	1
FBgn0000036	CG5610	nAChRalpha1	0.545819	0.158639	0.452	0.403	1
FBgn0004858	CG4220	elB	0.550374	-0.000789872	0.216	0.22	1
FBgn0262160	CG9932	CG9932	0.550853	0.0579731	0.261	0.238	1
FBgn0027598	CG31012	cindr	0.551715	0.276282	0.598	0.521	1
FBgn0051774	CG31774	fred	0.556007	0.0365022	0.235	0.211	1
FBgn0264606	CG43955	Fife	0.557518	0.0321531	0.257	0.25	1
FBgn0038063	CG33976	Octbeta2R	0.563148	0.165234	0.375	0.309	1
FBgn0052600	CG32600	dpr8	0.563951	0.101315	0.389	0.365	1
FBgn0041707	CG1168	7B2	0.565697	-0.210329	0.62	0.703	1
FBgn0000042	CG4027	Act5C	0.566793	-0.110496	0.588	0.649	1
FBgn0034725	CG6044	CG6044	0.566896	-0.181944	0.458	0.54	1
FBgn0051665	CG31665	wry	0.579094	0.112405	0.472	0.441	1
FBgn0029761	CG10706	SK	0.580408	0.313214	0.594	0.509	1
FBgn0050089	CG30089	CG30089	0.58469	0.00889333	0.104	0.101	1
FBgn0261698	CG42732	SLO2	0.588937	0.0692404	0.355	0.312	1
FBgn0013433	CG4846	beat-Ia	0.590092	0.00780389	0.178	0.173	1
FBgn0013981	CG3379	His4r	0.591666	-0.21666	0.938	0.954	1
FBgn0040532	CG8369	CG8369	0.594348	0.0146433	0.146	0.145	1
FBgn0283451	CG11491	br	0.598891	0.16448	0.27	0.291	1
FBgn0010412	CG4464	RpS19a	0.604658	0.0108869	0.301	0.294	1
FBgn0033192	CG2105	Corin	0.608404	0.0234203	0.25	0.231	1
FBgn0025360	CG18455	Optix	0.610017	-0.0307436	0.137	0.136	1
FBgn0031374	CG7337	Wdr62	0.620581	-0.0270949	0.441	0.44	1
FBgn0264975	CG1634	Nrg	0.622587	0.0523449	0.235	0.211	1
FBgn0039420	CG6154	CG6154	0.623148	0.0239849	0.223	0.223	1
FBgn0028370	CG4192	kek3	0.625061	0.007986	0.13	0.123	1
FBgn0030723	CG14948	dpr18	0.6281	0.0196121	0.109	0.095	1
FBgn0261836	CG42768	Msp300	0.631489	0.642678	0.841	0.77	1
FBgn0030174	CG15312	CG15312	0.647047	0.023138	0.219	0.214	1
FBgn0051721	CG31721	Trim9	0.649518	0.0306132	0.116	0.097	1
FBgn0261928	CG42795	CG42795	0.651467	0.0849839	0.357	0.331	1
FBgn0262593	CG43128	Shab	0.653965	0.17891	0.51	0.466	1
FBgn0028644	CG4838	beat-Ic	0.655051	0.131627	0.294	0.235	1
FBgn0263219	CG42330	Dscam4	0.659138	0.03768	0.16	0.128	1
FBgn0243486	CG15151	rdo	0.662162	-0.00109483	0.119	0.109	1
FBgn0285963	CG46339	CG46339	0.668134	0.0254009	0.188	0.172	1
FBgn0261788	CG42734	Ank2	0.689186	0.467588	0.802	0.754	1
FBgn0052183	CG32183	Ccn	0.689328	-0.0128976	0.196	0.205	1
FBgn0033438	CG1794	Mmp2	0.689475	-0.0264041	0.319	0.309	1
FBgn0031414	CG33955	eys	0.691566	-0.0121746	0.399	0.392	1
FBgn0050158	CG30158	CG30158	0.695518	0.00156681	0.112	0.109	1
FBgn0085383	CG34354	CG34354	0.696841	0.0782824	0.334	0.291	1
FBgn0004514	CG7485	Oct-TyrR	0.700315	-0.0071929	0.118	0.124	1
FBgn0036165	CG7533	chrb	0.700334	0.291251	0.629	0.566	1
FBgn0038084	CG14390	beat-Vc	0.709788	0.0229106	0.163	0.143	1
FBgn0038494	CG4135	beat-IIb	0.709985	0.00696229	0.145	0.132	1
FBgn0037521	CG2993	CG2993	0.71061	0.0645313	0.381	0.346	1
FBgn0086677	CG30040	jeb	0.723071	0.238181	0.437	0.371	1
FBgn0285948	CG15442	RpL27A	0.723856	-0.00383729	0.714	0.761	1
FBgn0039617	CG14521	DIP-gamma	0.729108	0.00262393	0.137	0.142	1
FBgn0066101	CG31094	LpR1	0.730496	0.049777	0.189	0.175	1
FBgn0035173	CG13907	CG13907	0.731428	0.00378018	0.106	0.109	1
FBgn0052062	CG32062	Rbfox1	0.734142	0.370584	0.875	0.845	1
FBgn0023534	CG17778	CG17778	0.737353	0.00731143	0.202	0.206	1
FBgn0033358	CG8216	spab	0.739648	-0.0250722	0.122	0.134	1
FBgn0000273	CG4379	Pka-C1	0.75002	0.169989	0.568	0.494	1
FBgn0024841	CG1963	Pcd	0.753208	-0.0072263	0.115	0.124	1
FBgn0260941	CG42318	app	0.755085	0.0144774	0.17	0.164	1
FBgn0261089	CG5559	Sytalpha	0.759345	0.0333028	0.148	0.134	1
FBgn0265182	CG44247	CG44247	0.763057	0.0207856	0.16	0.147	1
FBgn0035495	CG14989	CG14989	0.772451	0.164819	0.352	0.281	1
FBgn0266801	CG45263	CG45263	0.774569	-0.0647113	0.472	0.488	1
FBgn0005771	CG4491	noc	0.77522	0.0115496	0.121	0.109	1
FBgn0010263	CG3151	Rbp9	0.78171	0.185146	0.502	0.439	1
FBgn0043364	CG4427	cbt	0.78666	0.00410669	0.109	0.111	1
FBgn0052406	CG32406	PVRAP	0.804119	0.0265464	0.151	0.14	1
FBgn0263220	CG43388	Hk	0.807816	0.245293	0.789	0.78	1
FBgn0086758	CG31666	chinmo	0.811327	0.30831	0.778	0.756	1
FBgn0259171	CG42276	Pde9	0.813511	-0.0296724	0.478	0.499	1
FBgn0030412	CG17762	Tomosyn	0.814809	0.10235	0.519	0.46	1
FBgn0053202	CG33202	dpr11	0.815019	0.0138804	0.268	0.257	1
FBgn0040297	CG9256	Nhe2	0.819237	0.00803018	0.125	0.124	1
FBgn0038653	CG18208	Octalpha2R	0.829027	0.0249537	0.262	0.242	1
FBgn0030272	CG15201	CG15201	0.833011	0.0181347	0.112	0.102	1
FBgn0085407	CG34378	Pvf3	0.833665	0.187288	0.442	0.391	1
FBgn0037015	CG13253	cmpy	0.834533	0.0424785	0.264	0.244	1
FBgn0270928	CG32848	VAChT	0.836984	0.00187931	0.687	0.718	1
FBgn0086359	CG3953	Invadolysin	0.839357	0.010277	0.133	0.139	1
FBgn0267253	CG32700	CG32700	0.839385	0.0432641	0.196	0.179	1
FBgn0267336	CG34360	Glut4EF	0.840765	0.427933	0.785	0.718	1
FBgn0036043	CG8177	CG8177	0.841436	0.0364526	0.295	0.281	1
FBgn0085370	CG34341	Pde11	0.842687	0.00676294	0.11	0.101	1
FBgn0027608	CG2082	CG2082	0.855517	0.00465087	0.319	0.308	1
FBgn0086778	CG32538	nAChRalpha7	0.85776	0.247675	0.612	0.567	1
FBgn0039816	CG11317	CG11317	0.860207	-0.00228987	0.154	0.15	1
FBgn0250908	CG42242	beat-VII	0.863316	0.0165582	0.174	0.164	1
FBgn0010415	CG10497	Sdc	0.867815	-0.000507544	0.635	0.637	1
FBgn0085432	CG34403	pan	0.870048	0.634946	0.718	0.564	1
FBgn0038237	CG8279	Pde6	0.880018	0.1605	0.541	0.509	1
FBgn0085409	CG34380	smal	0.886146	0.0435852	0.229	0.22	1
FBgn0031835	CG11319	CG11319	0.886272	0.0473546	0.324	0.305	1
FBgn0003380	CG12348	Sh	0.894624	1.36426	0.928	0.913	1
FBgn0261113	CG17836	Xrp1	0.902221	0.00405173	0.157	0.166	1
FBgn0261549	CG42667	rdgA	0.911674	0.0681671	0.272	0.257	1
FBgn0035499	CG14996	Chd64	0.917915	0.0214106	0.115	0.099	1
FBgn0053147	CG33147	Hs3st-A	0.924853	0.285768	0.786	0.748	1
FBgn0001233	CG1242	Hsp83	0.924942	-0.167049	0.667	0.714	1
FBgn0051221	CG31221	CG31221	0.925319	1.15676	0.828	0.766	1
FBgn0266418	CG45058	wake	0.930222	0.012972	0.147	0.149	1
FBgn0038282	CG33485	dpr9	0.932841	0.034235	0.408	0.394	1
FBgn0015229	CG6575	glec	0.933762	0.0754925	0.242	0.204	1
FBgn0262738	CG3620	norpA	0.944286	-0.0536003	0.478	0.49	1
FBgn0038498	CG14334	beat-IIa	0.951575	0.0797986	0.325	0.284	1
FBgn0262869	CG43224	Gfrl	0.951652	0.160539	0.558	0.535	1
FBgn0000108	CG7727	Appl	0.95208	0.463051	0.823	0.802	1
FBgn0024321	CG8524	NK7.1	0.952869	0.0294074	0.192	0.175	1
FBgn0028496	CG30116	CG30116	0.955836	-0.0390819	0.311	0.316	1
FBgn0004611	CG4574	Plc21C	0.961624	0.0104838	0.405	0.384	1
FBgn0052626	CG32626	AMPdeam	0.967055	0.000742458	0.154	0.152	1
FBgn0264000	CG43743	GluRIB	0.970135	0.150077	0.31	0.254	1
FBgn0261509	CG14351	haf	0.970205	0.0164418	0.152	0.147	1
FBgn0083950	CG34114	side-VI	0.981265	0.208625	0.473	0.416	1
FBgn0002593	CG4087	RpLP1	0.983383	-0.440014	0.706	0.819	1
FBgn0264815	CG44007	Pde1c	0.986163	0.0586154	0.285	0.261	1
FBgn0261588	CG42698	pdm3	0.986811	0.0340959	0.259	0.259	1
FBgn0004244	CG10537	Rdl	0.986979	0.119969	0.952	0.975	1
FBgn0264503	CG43902	CG43902	0.996008	0.092693	0.293	0.275	1
FBgn0265487	CG33197	mbl	0.999375	0.312027	0.697	0.688	1

## Sheet: Female_C8
FlyBaseID	GeneID	Gene symbol	p_val	avg_diff	pct.1	pct.2	p_val_adj
FBgn0019660	CR32665	lncRNA:roX2	0	-3.65117	0.01	0.926	0
FBgn0002868	CG9470	MtnA	1.19203e-25	0.270467	0.308	0.16	1.78805e-22
FBgn0085753	CR40596	28SrRNA-Psi:CR40596	7.9852e-24	0.145764	0.107	0.016	1.19778e-20
FBgn0011693	CG4899	Pdh	5.13958e-21	-0.0926642	0.028	0.102	7.70937e-18
FBgn0259170	CG42275	alpha-Man-Ia	9.78005e-21	0.359398	0.392	0.246	1.46701e-17
FBgn0052683	CG32683	CG32683	1.25192e-16	0.137078	0.215	0.143	1.87788e-13
FBgn0265052	CG44167	St3	2.83607e-14	0.185599	0.263	0.153	4.25411e-11
FBgn0004652	CG14307	fru	3.42605e-14	0.326292	0.249	0.108	5.13908e-11
FBgn0264753	CG44011	Rgk1	7.82057e-14	0.104567	0.129	0.061	1.17309e-10
FBgn0033987	CG12424	ckn	1.77486e-13	0.164985	0.202	0.104	2.6623e-10
FBgn0265595	CG44422	CG44422	2.8265e-13	0.659638	0.398	0.228	4.23974e-10
FBgn0029824	CG3726	CG3726	1.04249e-12	0.230577	0.314	0.198	1.56373e-09
FBgn0038246	CG14853	CG14853	1.67815e-12	0.106323	0.186	0.121	2.51723e-09
FBgn0065099	CR33925	snRNA:7SK	5.41763e-12	4.35511	0.646	0.492	8.12644e-09
FBgn0003301	CG9533	rut	6.62936e-12	0.0800552	0.138	0.084	9.94403e-09
FBgn0261953	CG7807	TfAP-2	7.4864e-11	0.147557	0.164	0.08	1.12296e-07
FBgn0004395	CG4620	unk	7.64642e-11	0.20884	0.254	0.152	1.14696e-07
FBgn0042696	CG2380	NfI	9.55674e-11	0.191222	0.241	0.151	1.43351e-07
FBgn0261988	CG17998	Gprk2	1.37758e-10	0.260117	0.429	0.313	2.06636e-07
FBgn0260753	CG13758	Pdfr	1.69462e-10	0.101074	0.156	0.091	2.54193e-07
FBgn0086778	CG32538	nAChRalpha7	4.92839e-10	0.821314	0.459	0.443	7.39258e-07
FBgn0029768	CG16752	SPR	6.19884e-10	0.153432	0.25	0.173	9.29825e-07
FBgn0002940	CG4550	ninaE	2.14453e-09	-0.153131	0.081	0.141	3.21679e-06
FBgn0010300	CG10719	brat	3.3207e-09	0.22407	0.262	0.173	4.98106e-06
FBgn0038665	CG12269	euc	3.33007e-09	0.0868201	0.114	0.064	4.9951e-06
FBgn0058469	CR40469	lncRNA:CR40469	4.99875e-09	0.113321	0.14	0.07	7.49812e-06
FBgn0261262	CG42613	CG42613	6.37934e-09	0.37326	0.312	0.163	9.569e-06
FBgn0051324	CG31324	CG31324	1.00402e-08	0.184113	0.287	0.196	1.50603e-05
FBgn0039209	CG13624	REPTOR	1.0778e-08	0.258128	0.323	0.21	1.6167e-05
FBgn0052982	CG32982	CG32982	1.11226e-08	0.11981	0.158	0.089	1.6684e-05
FBgn0013995	CG5685	Calx	1.14288e-08	0.547231	0.421	0.297	1.71432e-05
FBgn0052057	CG32057	dpr10	1.27642e-08	0.204837	0.194	0.1	1.91464e-05
FBgn0261260	CG42611	mgl	1.56928e-08	0.124359	0.152	0.077	2.35391e-05
FBgn0004619	CG8442	GluRIA	1.69803e-08	0.150743	0.152	0.082	2.54704e-05
FBgn0052206	CG32206	CG32206	2.42779e-08	0.185144	0.285	0.193	3.64169e-05
FBgn0003997	CG5123	hid	4.70892e-08	0.079116	0.114	0.067	7.06338e-05
FBgn0022382	CG15862	Pka-R2	6.30115e-08	0.150657	0.302	0.22	9.45172e-05
FBgn0004852	CG7978	Ac76E	1.79329e-07	0.0446961	0.114	0.086	0.000268994
FBgn0267668	CR46006	lncRNA:CR46006	1.91212e-07	0.279816	0.35	0.233	0.000286818
FBgn0260971	CG42594	CG42594	2.15668e-07	0.121676	0.188	0.127	0.000323502
FBgn0283499	CG18402	InR	2.23523e-07	0.137993	0.227	0.151	0.000335285
FBgn0028369	CG3653	kirre	2.36768e-07	0.432554	0.425	0.293	0.000355152
FBgn0031306	CG4577	CG4577	2.92095e-07	0.0948066	0.197	0.152	0.000438142
FBgn0085399	CG34370	CG34370	3.05616e-07	0.0933702	0.138	0.08	0.000458424
FBgn0264308	CG43778	CG43778	3.77192e-07	0.0643462	0.16	0.119	0.000565788
FBgn0052521	CG32521	CG32521	6.0789e-07	0.0591344	0.108	0.071	0.000911834
FBgn0015777	CG9261	nrv2	6.18909e-07	0.117459	0.171	0.103	0.000928364
FBgn0260442	CG6831	rhea	6.30989e-07	0.0659116	0.104	0.057	0.000946484
FBgn0002543	CG5481	robo2	7.20043e-07	0.0403376	0.104	0.074	0.00108006
FBgn0032629	CG15138	beat-IIIc	7.26761e-07	0.281866	0.352	0.244	0.00109014
FBgn0028644	CG4838	beat-Ic	1.72441e-06	1.32835	0.56	0.484	0.00258662
FBgn0001085	CG17697	fz	2.18359e-06	0.0569122	0.225	0.19	0.00327538
FBgn0029663	CG10804	CG10804	2.29957e-06	0.088938	0.136	0.08	0.00344936
FBgn0033356	CG8229	CG8229	4.20924e-06	-0.0596194	0.102	0.147	0.00631386
FBgn0020269	CG10145	mspo	4.67525e-06	0.0624678	0.233	0.199	0.00701287
FBgn0051092	CG31092	LpR2	4.6977e-06	0.0564518	0.167	0.134	0.00704654
FBgn0019662	CG8593	qm	4.85809e-06	0.0234561	0.146	0.127	0.00728713
FBgn0039064	CG4467	CG4467	4.88926e-06	0.450049	0.474	0.323	0.00733388
FBgn0000028	CG9151	acj6	6.25985e-06	0.777397	0.528	0.509	0.00938978
FBgn0262473	CG5490	Tl	8.95776e-06	0.158533	0.283	0.216	0.0134366
FBgn0015229	CG6575	glec	1.08274e-05	0.332192	0.403	0.291	0.0162411
FBgn0000121	CG5962	Arr2	1.1371e-05	-0.120589	0.065	0.107	0.0170564
FBgn0085426	CG34397	Rgk3	1.13943e-05	0.0536219	0.107	0.078	0.0170915
FBgn0083228	CG5907	Frq2	1.21741e-05	0.0868692	0.232	0.2	0.0182611
FBgn0051163	CG31163	SKIP	2.04899e-05	0.0401351	0.125	0.097	0.0307348
FBgn0033196	CG1358	CG1358	2.36003e-05	0.100368	0.211	0.154	0.0354004
FBgn0052204	CG32204	CG32204	4.07118e-05	0.0810927	0.148	0.098	0.0610677
FBgn0262737	CG7437	mub	5.73279e-05	0.998471	0.832	0.726	0.0859919
FBgn0263257	CG43395	Cngl	6.25137e-05	1.34697	0.85	0.719	0.0937705
FBgn0083950	CG34114	side-VI	7.13228e-05	0.185556	0.486	0.448	0.106984
FBgn0011656	CG1429	Mef2	8.20723e-05	0.124438	0.262	0.198	0.123108
FBgn0052066	CG32066	CG32066	8.41848e-05	0.0356292	0.145	0.117	0.126277
FBgn0000273	CG4379	Pka-C1	9.12191e-05	0.19547	0.644	0.553	0.136829
FBgn0003380	CG12348	Sh	0.000103691	1.49355	0.947	0.926	0.155536
FBgn0036144	CG6207	GlcAT-P	0.000107314	-0.0421977	0.145	0.172	0.160971
FBgn0014163	CG4609	fax	0.000145315	0.376065	0.466	0.321	0.217972
FBgn0266100	CG44837	CG44837	0.000154165	0.0955371	0.152	0.093	0.231248
FBgn0266429	CG2872	AstA-R1	0.000200156	0.0647821	0.101	0.066	0.300235
FBgn0262160	CG9932	CG9932	0.000236875	0.253339	0.298	0.209	0.355312
FBgn0037153	CG12673	olf413	0.00028841	0.00889503	0.138	0.131	0.432614
FBgn0013733	CG18076	shot	0.000321021	0.0867649	0.251	0.209	0.481531
FBgn0085391	CG34362	trv	0.000361339	1.46017	0.827	0.673	0.542009
FBgn0011666	CG5099	msi	0.00041742	0.869159	0.643	0.41	0.62613
FBgn0003285	CG4125	rst	0.000453365	0.0790915	0.115	0.071	0.680047
FBgn0259234	CG42332	Camta	0.000460787	0.0961019	0.201	0.149	0.691181
FBgn0083963	CG34127	Nlg3	0.000519776	0.109435	0.387	0.33	0.779664
FBgn0083975	CG34139	Nlg4	0.000536098	0.0219583	0.178	0.174	0.804147
FBgn0033403	CG13739	CG13739	0.000563102	0.105764	0.106	0.046	0.844653
FBgn0037956	CG6959	CG6959	0.000672835	0.0258134	0.119	0.104	1
FBgn0038542	CG7431	TyrR	0.000684294	0.0544199	0.155	0.111	1
FBgn0010412	CG4464	RpS19a	0.000726995	0.126568	0.271	0.206	1
FBgn0023179	CG6438	amon	0.000759891	0.0566667	0.262	0.228	1
FBgn0262509	CG43079	nrm	0.000776786	0.23582	0.254	0.182	1
FBgn0262738	CG3620	norpA	0.000821068	-0.109853	0.314	0.38	1
FBgn0031738	CG9171	CG9171	0.000845867	0.0763904	0.178	0.133	1
FBgn0052062	CG32062	Rbfox1	0.000871309	0.57612	0.907	0.879	1
FBgn0032833	CG10664	COX4	0.000938492	-0.388269	0.686	0.794	1
FBgn0261552	CG42670	ps	0.000977748	-0.0141252	0.943	0.963	1
FBgn0040532	CG8369	CG8369	0.000981085	0.0569859	0.196	0.168	1
FBgn0263706	CG43658	CG43658	0.0010081	0.0666974	0.244	0.226	1
FBgn0267322	CR45758	lncRNA:CR45758	0.00111567	0.126071	0.182	0.131	1
FBgn0010263	CG3151	Rbp9	0.00128125	0.241289	0.38	0.304	1
FBgn0037015	CG13253	cmpy	0.00133554	0.0735298	0.119	0.07	1
FBgn0015609	CG7100	CadN	0.00133591	0.26609	0.368	0.28	1
FBgn0250869	CG42240	CG42240	0.00134574	0.0393063	0.103	0.073	1
FBgn0286778	CG46385	CG46385	0.00139279	0.185433	0.233	0.17	1
FBgn0027356	CG8604	Amph	0.00140196	0.0667956	0.133	0.097	1
FBgn0030158	CG9686	CG9686	0.00154987	0.0680172	0.103	0.066	1
FBgn0002643	CG8118	mam	0.00158304	0.0788889	0.133	0.09	1
FBgn0087012	CG1056	5-HT2A	0.00164948	0.0700368	0.134	0.096	1
FBgn0266756	CG44012	btsz	0.00176044	0.0603315	0.113	0.068	1
FBgn0000042	CG4027	Act5C	0.00180039	0.0837876	0.504	0.503	1
FBgn0031299	CG4629	CG4629	0.00182609	0.0846593	0.109	0.064	1
FBgn0052506	CG32506	CG32506	0.00199265	0.0811664	0.345	0.302	1
FBgn0264574	CG43946	Glut1	0.00203112	0.114187	0.357	0.328	1
FBgn0024321	CG8524	NK7.1	0.00232572	0.132486	0.232	0.162	1
FBgn0026160	CG7958	tna	0.00234489	0.391252	0.51	0.437	1
FBgn0267910	CR34335	lncRNA:CR34335	0.00238231	6.48448	0.992	0.954	1
FBgn0039349	CG4685	Ssadh	0.00240573	0.00577655	0.12	0.119	1
FBgn0261556	CG42674	CG42674	0.0025065	-0.10609	0.074	0.126	1
FBgn0000547	CG12676	ed	0.00264247	0.048011	0.11	0.086	1
FBgn0003091	CG6622	Pkc53E	0.00283826	0.194377	0.302	0.242	1
FBgn0066101	CG31094	LpR1	0.00290637	0.082345	0.238	0.203	1
FBgn0039054	CG13830	Cow	0.00300229	0.212026	0.496	0.427	1
FBgn0039089	CG10152	beat-IV	0.00302229	0.0865378	0.147	0.103	1
FBgn0261836	CG42768	Msp300	0.00333647	0.292689	0.697	0.609	1
FBgn0085413	CG34384	CG34384	0.00338336	0.186004	0.309	0.241	1
FBgn0264503	CG43902	CG43902	0.00372424	0.376028	0.361	0.277	1
FBgn0085380	CG34351	CG34351	0.00372692	0.0521977	0.147	0.116	1
FBgn0036773	CG13698	CG13698	0.00382341	-0.0500982	0.147	0.191	1
FBgn0010329	CG1543	Tbh	0.0038881	0.0457643	0.124	0.098	1
FBgn0027339	CG11352	jim	0.00407233	3.23581	0.991	0.991	1
FBgn0264908	CG44099	pHCl-1	0.00421222	0.394401	0.454	0.37	1
FBgn0004449	CG5723	Ten-m	0.00439195	0.0290424	0.12	0.103	1
FBgn0261928	CG42795	CG42795	0.00442215	0.153554	0.32	0.26	1
FBgn0032151	CG4128	nAChRalpha6	0.00450804	3.88711	0.791	0.697	1
FBgn0264490	CG18389	Eip93F	0.00460178	0.300945	0.307	0.207	1
FBgn0262782	CG5362	Mdh1	0.0049663	0.00135052	0.112	0.124	1
FBgn0036454	CG17839	CG17839	0.00501688	0.192572	0.312	0.249	1
FBgn0034286	CG33996	dpr13	0.00517655	0.196845	0.362	0.296	1
FBgn0250910	CG42244	Octbeta3R	0.0053202	0.0413382	0.118	0.09	1
FBgn0085447	CG34418	sif	0.00546555	0.680945	0.623	0.411	1
FBgn0000064	CG6058	Ald1	0.00550301	-0.229675	0.491	0.589	1
FBgn0004580	CG6702	Cbp53E	0.00552556	1.08274	0.825	0.763	1
FBgn0003423	CG1417	slgA	0.00626037	0.280712	0.389	0.248	1
FBgn0004244	CG10537	Rdl	0.00653311	0.691013	0.978	0.972	1
FBgn0086677	CG30040	jeb	0.00656107	0.118471	0.338	0.286	1
FBgn0024732	CG8357	Drep1	0.00731053	0.0580909	0.109	0.07	1
FBgn0260941	CG42318	app	0.00799001	-0.0217741	0.096	0.112	1
FBgn0264000	CG43743	GluRIB	0.00816381	0.1076	0.218	0.19	1
FBgn0262018	CG42829	CadN2	0.00823093	0.00904236	0.133	0.126	1
FBgn0085369	CG34340	Drgx	0.00888797	0.0777901	0.14	0.099	1
FBgn0038321	CG6218	CG6218	0.00890249	0.0346839	0.126	0.098	1
FBgn0262869	CG43224	Gfrl	0.0093015	0.226409	0.651	0.624	1
FBgn0284243	CG9277	betaTub56D	0.0103324	-0.13237	0.266	0.328	1
FBgn0029922	CG14431	CG14431	0.0104957	0.0622038	0.14	0.106	1
FBgn0004369	CG11516	Ptp99A	0.0105326	0.774684	0.639	0.516	1
FBgn0263994	CG43737	CG43737	0.0105412	0.194021	0.339	0.278	1
FBgn0036844	CG14080	Mkp3	0.0108463	0.210417	0.386	0.303	1
FBgn0261113	CG17836	Xrp1	0.0110248	0.0477103	0.152	0.116	1
FBgn0035816	CG13685	CG13685	0.011332	0.0914487	0.229	0.188	1
FBgn0040765	CG33473	luna	0.0116123	0.0815961	0.191	0.161	1
FBgn0023095	CG11282	caps	0.0116312	0.0678392	0.129	0.103	1
FBgn0267336	CG34360	Glut4EF	0.0116633	1.20797	0.934	0.908	1
FBgn0034978	CG3257	CG3257	0.0119163	0.0402026	0.129	0.097	1
FBgn0250867	CG42238	CG42238	0.0120558	0.115623	0.242	0.209	1
FBgn0051619	CG31619	nolo	0.0129226	0.0540516	0.246	0.223	1
FBgn0264975	CG1634	Nrg	0.0132311	0.0554389	0.15	0.128	1
FBgn0039420	CG6154	CG6154	0.0139431	0.0697913	0.165	0.124	1
FBgn0085400	CG34371	side-V	0.0140515	0.0954451	0.147	0.103	1
FBgn0000535	CG10952	eag	0.0148246	0.158005	0.382	0.359	1
FBgn0034808	CG9896	CG9896	0.0161263	0.418527	0.389	0.323	1
FBgn0283451	CG11491	br	0.0162012	0.0812769	0.103	0.06	1
FBgn0261089	CG5559	Sytalpha	0.016945	0.0700061	0.248	0.237	1
FBgn0050361	CG30361	mtt	0.0173587	0.0975936	0.135	0.103	1
FBgn0004198	CG11387	ct	0.0179203	2.0182	0.944	0.918	1
FBgn0085387	CG34358	shakB	0.0186231	0.0719091	0.331	0.323	1
FBgn0030505	CG11172	NFAT	0.0186664	0.155869	0.313	0.254	1
FBgn0001186	CG3001	Hex-A	0.0192065	0.407213	0.455	0.317	1
FBgn0015774	CG10521	NetB	0.0197219	0.147502	0.222	0.186	1
FBgn0267001	CG42338	Ten-a	0.0197402	1.81345	0.904	0.774	1
FBgn0015399	CG12283	kek1	0.0202144	0.44674	0.528	0.433	1
FBgn0259171	CG42276	Pde9	0.0202457	0.0585881	0.54	0.544	1
FBgn0000108	CG7727	Appl	0.0224158	0.916826	0.896	0.866	1
FBgn0002945	CG11614	nkd	0.0229399	0.210841	0.322	0.266	1
FBgn0030723	CG14948	dpr18	0.0273751	0.0531799	0.172	0.137	1
FBgn0037976	CG14734	Tk	0.0275118	-0.131258	0.313	0.354	1
FBgn0052600	CG32600	dpr8	0.0292595	0.110381	0.376	0.354	1
FBgn0010434	CG11949	cora	0.0303833	0.0469429	0.107	0.084	1
FBgn0035050	CG4871	SiaT	0.030675	-0.0108778	0.215	0.234	1
FBgn0010105	CG17943	comm	0.0306936	0.0414979	0.102	0.073	1
FBgn0024189	CG33141	sns	0.0313105	0.0124862	0.108	0.116	1
FBgn0260003	CG34157	Dys	0.0319794	0.0234193	0.136	0.122	1
FBgn0033250	CG14762	CG14762	0.0323283	-0.0345304	0.434	0.447	1
FBgn0019985	CG11144	mGluR	0.0353267	0.00134438	0.106	0.106	1
FBgn0031016	CG12199	kek5	0.0354143	0.0302885	0.106	0.092	1
FBgn0050089	CG30089	CG30089	0.0363027	-0.030577	0.084	0.11	1
FBgn0004595	CG17228	pros	0.0413743	0.941154	0.891	0.812	1
FBgn0264815	CG44007	Pde1c	0.0451907	0.257348	0.451	0.391	1
FBgn0267252	CG3694	Ggamma30A	0.0453608	-0.00238183	0.859	0.842	1
FBgn0259243	CG42341	Pka-R1	0.0461506	0.0263229	0.181	0.168	1
FBgn0259244	CG42342	CG42342	0.0481814	-0.0073849	0.168	0.187	1
FBgn0261999	CG42817	Ca-Ma2d	0.0498302	-0.0529957	0.101	0.133	1
FBgn0035756	CG32381	unc-13-4A	0.0506164	0.0631799	0.127	0.102	1
FBgn0013954	CG11001	Fkbp12	0.0535472	-0.0829589	0.404	0.438	1
FBgn0011818	CG9884	oaf	0.0535642	0.0391099	0.118	0.101	1
FBgn0001091	CG12055	Gapdh1	0.0562134	-0.0917004	0.208	0.247	1
FBgn0032797	CG10186	Hasp	0.0587991	-0.0719276	0.698	0.74	1
FBgn0038494	CG4135	beat-IIb	0.0589986	0.0565009	0.273	0.263	1
FBgn0261046	CG31190	Dscam3	0.0612721	0.149963	0.21	0.168	1
FBgn0036165	CG7533	chrb	0.0630363	0.32202	0.613	0.502	1
FBgn0066084	CG30425	RpL41	0.0637405	1.67627	0.878	0.427	1
FBgn0053202	CG33202	dpr11	0.0659802	-0.0141314	0.103	0.11	1
FBgn0010113	CG15532	hdc	0.0662226	0.281676	0.356	0.247	1
FBgn0035032	CG4692	ATPsynF	0.0664696	-0.335064	0.697	0.793	1
FBgn0264386	CG15899	Ca-alpha1T	0.0704006	0.60019	0.58	0.399	1
FBgn0085382	CG34353	CG34353	0.0708529	0.0947944	0.203	0.168	1
FBgn0260793	CG42573	2mit	0.0728708	0.0546163	0.128	0.094	1
FBgn0028407	CG8364	Drep3	0.0731031	0.0685881	0.156	0.131	1
FBgn0261549	CG42667	rdgA	0.0736069	0.217213	0.554	0.528	1
FBgn0265182	CG44247	CG44247	0.0745394	0.0102087	0.125	0.119	1
FBgn0032840	CG13968	sNPF	0.0749961	0.169331	0.208	0.163	1
FBgn0263220	CG43388	Hk	0.0834098	0.859988	0.83	0.768	1
FBgn0085434	CG34405	NaCP60E	0.0840864	0.571019	0.69	0.603	1
FBgn0016797	CG9739	fz2	0.0844913	0.141363	0.199	0.156	1
FBgn0259677	CG42346	CG42346	0.0851359	0.0489994	0.11	0.093	1
FBgn0260462	CG12163	CG12163	0.0856722	0.0469245	0.11	0.089	1
FBgn0085407	CG34378	Pvf3	0.0858955	0.37922	0.552	0.486	1
FBgn0000036	CG5610	nAChRalpha1	0.0883814	0.139926	0.391	0.353	1
FBgn0041094	CG7590	scyl	0.0919371	0.106703	0.453	0.42	1
FBgn0000037	CG4356	mAChR-A	0.0927289	0.0436525	0.22	0.199	1
FBgn0261258	CG6014	rgn	0.093484	-0.031283	0.245	0.258	1
FBgn0000575	CG1007	emc	0.0937308	0.170669	0.475	0.43	1
FBgn0013686	CR34094	mt:lrRNA	0.0947713	11.1134	0.925	0.494	1
FBgn0003165	CG9755	pum	0.102832	1.37679	0.786	0.477	1
FBgn0000636	CG5803	Fas3	0.104879	0.15706	0.265	0.221	1
FBgn0265487	CG33197	mbl	0.104973	0.0524125	0.21	0.178	1
FBgn0035499	CG14996	Chd64	0.105265	0.0435298	0.119	0.099	1
FBgn0261788	CG42734	Ank2	0.106885	0.555193	0.736	0.593	1
FBgn0027608	CG2082	CG2082	0.108312	-0.0892449	0.407	0.447	1
FBgn0259821	CG42402	CG42402	0.111782	0.0901105	0.105	0.07	1
FBgn0052406	CG32406	PVRAP	0.112552	0.0365255	0.156	0.134	1
FBgn0039232	CG13636	sosie	0.11451	0.510546	0.518	0.509	1
FBgn0004858	CG4220	elB	0.115397	0.0202578	0.112	0.101	1
FBgn0052647	CG32647	CG32647	0.12077	0.0386065	0.291	0.273	1
FBgn0013467	CG18285	igl	0.125019	0.714923	0.651	0.504	1
FBgn0052432	CG32432	CG32432	0.126128	0.0133824	0.262	0.263	1
FBgn0259108	CG34387	futsch	0.135906	0.177563	0.862	0.831	1
FBgn0052677	CG32677	X11Lbeta	0.136327	0.13415	0.355	0.32	1
FBgn0040571	CG17193	CG17193	0.138032	-0.00756292	0.119	0.123	1
FBgn0264895	CG44086	RapGAP1	0.138918	0.145089	0.428	0.402	1
FBgn0264006	CG43749	dysc	0.139249	0.470061	0.807	0.782	1
FBgn0004242	CG3139	Syt1	0.142824	0.830203	0.869	0.854	1
FBgn0032400	CG6770	CG6770	0.144901	0.53674	0.757	0.652	1
FBgn0267978	CG8376	ap	0.147377	0.0605402	0.222	0.191	1
FBgn0259242	CG42340	CG42340	0.149625	-0.0481215	0.183	0.222	1
FBgn0285948	CG15442	RpL27A	0.149907	0.341363	0.789	0.76	1
FBgn0033438	CG1794	Mmp2	0.15115	-0.0347882	0.355	0.389	1
FBgn0001233	CG1242	Hsp83	0.151288	-0.0444199	0.487	0.459	1
FBgn0051774	CG31774	fred	0.152327	0.114432	0.22	0.187	1
FBgn0030272	CG15201	CG15201	0.16029	0.0596071	0.154	0.128	1
FBgn0051690	CG31690	CG31690	0.164707	0.0920503	0.129	0.094	1
FBgn0250908	CG42242	beat-VII	0.165246	-0.0144199	0.228	0.251	1
FBgn0038653	CG18208	Octalpha2R	0.165921	0.214297	0.435	0.43	1
FBgn0285952	CG3186	eEF5	0.167042	-0.0319644	0.235	0.267	1
FBgn0270928	CG32848	VAChT	0.16781	0.194647	0.639	0.626	1
FBgn0029761	CG10706	SK	0.170182	0.329902	0.414	0.299	1
FBgn0041707	CG1168	7B2	0.17238	-0.095531	0.604	0.641	1
FBgn0038087	CG10134	beat-Va	0.173487	0.0501351	0.107	0.087	1
FBgn0038282	CG33485	dpr9	0.173634	0.06938	0.394	0.37	1
FBgn0053517	CG33517	Dop2R	0.177144	0.734592	0.987	0.98	1
FBgn0030897	CG5744	Frq1	0.180272	1.15385	0.806	0.682	1
FBgn0035495	CG14989	CG14989	0.182644	0.207999	0.548	0.416	1
FBgn0037913	CG6783	fabp	0.183889	-0.0666053	0.123	0.152	1
FBgn0028704	CG18660	Nckx30C	0.184762	0.330522	0.803	0.781	1
FBgn0263995	CG43738	cpo	0.190415	0.864487	0.885	0.864	1
FBgn0085383	CG34354	CG34354	0.194012	0.185285	0.343	0.301	1
FBgn0263397	CG8585	Ih	0.207109	0.651197	0.857	0.773	1
FBgn0260658	CG42541	CG42541	0.211726	-0.48132	0.687	0.74	1
FBgn0000422	CG10697	Ddc	0.21309	0.017299	0.155	0.16	1
FBgn0013576	CG32464	mtd	0.220667	0.462431	0.632	0.448	1
FBgn0035041	CG13594	CG13594	0.221792	-0.0184592	0.093	0.117	1
FBgn0261804	CG42750	CG42750	0.224693	0.023585	0.315	0.302	1
FBgn0003274	CG4918	RpLP2	0.225936	0.0185451	0.526	0.51	1
FBgn0034725	CG6044	CG6044	0.230379	-0.0495519	0.214	0.236	1
FBgn0261698	CG42732	SLO2	0.230674	0.0360467	0.346	0.373	1
FBgn0287186	CG17594	scro	0.23089	0.292781	0.51	0.472	1
FBgn0028645	CG7644	beat-Ib	0.231839	0.366452	0.444	0.401	1
FBgn0031374	CG7337	Wdr62	0.232615	0.167452	0.429	0.391	1
FBgn0263930	CG4974	dally	0.236377	0.00395948	0.177	0.196	1
FBgn0261574	CG7749	kug	0.23986	0.0244997	0.139	0.131	1
FBgn0263353	CG11000	CG11000	0.239978	0.147489	0.547	0.514	1
FBgn0005775	CG7503	Con	0.249086	1.49915	0.804	0.728	1
FBgn0011224	CG31000	heph	0.254811	1.08992	0.797	0.654	1
FBgn0037521	CG2993	CG2993	0.254887	0.038938	0.349	0.35	1
FBgn0052264	CG32264	CG32264	0.261597	0.569073	0.717	0.568	1
FBgn0267033	CG45477	mamo	0.269374	0.793849	0.648	0.519	1
FBgn0037676	CG8861	CG8861	0.269926	0.13671	0.302	0.259	1
FBgn0263773	CG43690	fok	0.270025	0.0548557	0.302	0.28	1
FBgn0052626	CG32626	AMPdeam	0.27193	0.00375077	0.101	0.097	1
FBgn0051665	CG31665	wry	0.272103	0.198686	0.327	0.272	1
FBgn0010114	CG2040	hig	0.274575	0.0792388	0.519	0.501	1
FBgn0031897	CG13784	CG13784	0.277054	0.0358318	0.231	0.204	1
FBgn0000633	CG17716	CG17716	0.277519	0.123917	0.348	0.341	1
FBgn0037525	CG17816	CG17816	0.285078	0.151707	0.398	0.308	1
FBgn0038826	CG17838	Syp	0.286098	0.330356	0.467	0.348	1
FBgn0020907	CG14904	Scp2	0.289017	-0.0373972	0.091	0.117	1
FBgn0261597	CG10305	RpS26	0.293204	-0.244015	0.859	0.89	1
FBgn0028481	CG4341	CG4341	0.294458	0.0996562	0.138	0.112	1
FBgn0033192	CG2105	Corin	0.298823	0.0223266	0.327	0.354	1
FBgn0034753	CG2852	CG2852	0.303198	-0.0156967	0.274	0.28	1
FBgn0083949	CG34113	side-III	0.304611	0.472069	0.708	0.67	1
FBgn0000567	CG32180	Eip74EF	0.305215	0.0214426	0.104	0.102	1
FBgn0263997	CG43740	CG43740	0.305676	0.0498649	0.161	0.137	1
FBgn0085409	CG34380	smal	0.320272	0.0256538	0.243	0.248	1
FBgn0043364	CG4427	cbt	0.323092	-0.0129527	0.097	0.114	1
FBgn0031294	CG31795	IA-2	0.325637	2.62595	0.977	0.958	1
FBgn0085397	CG34368	Fili	0.32666	0.0155064	0.13	0.138	1
FBgn0036934	CG7395	sNPF-R	0.332947	-0.0241682	0.113	0.134	1
FBgn0003429	CG10693	slo	0.333405	0.557244	0.662	0.516	1
FBgn0013981	CG3379	His4r	0.338387	0.255856	0.969	0.947	1
FBgn0039346	CG5079	CG5079	0.338442	-0.0186679	0.107	0.12	1
FBgn0000659	CG10002	fkh	0.340981	0.171172	0.267	0.237	1
FBgn0032901	CG9339	sky	0.343397	0.0592204	0.464	0.458	1
FBgn0031835	CG11319	CG11319	0.344183	0.112026	0.327	0.31	1
FBgn0034731	CG10384	CG10384	0.345158	0.0958195	0.198	0.169	1
FBgn0010452	CG11280	trn	0.348248	-0.0342726	0.103	0.121	1
FBgn0027598	CG31012	cindr	0.349606	0.213223	0.404	0.36	1
FBgn0051221	CG31221	CG31221	0.354221	1.60142	0.957	0.883	1
FBgn0031414	CG33955	eys	0.355895	0.0190976	0.222	0.207	1
FBgn0262614	CG43140	pyd	0.358363	0.061725	0.11	0.119	1
FBgn0036494	CG7250	Toll-6	0.360645	0.0473112	0.175	0.153	1
FBgn0265002	CG44153	CG44153	0.36151	-0.0161019	0.192	0.207	1
FBgn0030090	CG12664	fend	0.363148	-0.0239472	0.213	0.223	1
FBgn0036935	CG14186	CG14186	0.365362	0.0312584	0.125	0.108	1
FBgn0052017	CG32017	CG32017	0.371805	0.27054	0.392	0.292	1
FBgn0053543	CG33543	CG33543	0.37946	-0.020798	0.214	0.238	1
FBgn0019650	CG11186	toy	0.382666	0.0639104	0.133	0.113	1
FBgn0014859	CG1864	Hr38	0.386897	-0.153745	0.305	0.313	1
FBgn0262593	CG43128	Shab	0.388645	0.239337	0.439	0.401	1
FBgn0053179	CG33179	beat-IIIb	0.388837	0.0277594	0.261	0.234	1
FBgn0261588	CG42698	pdm3	0.392543	0.058895	0.244	0.27	1
FBgn0085432	CG34403	pan	0.395363	1.50684	0.801	0.646	1
FBgn0030432	CG4404	CG4404	0.401368	0.0111295	0.152	0.14	1
FBgn0039380	CG5890	CG5890	0.402256	0.0353714	0.263	0.252	1
FBgn0036043	CG8177	CG8177	0.403515	0.0560344	0.214	0.192	1
FBgn0033268	CG2297	Obp44a	0.40438	-0.0793923	0.187	0.21	1
FBgn0038063	CG33976	Octbeta2R	0.408404	0.193677	0.391	0.322	1
FBgn0267253	CG32700	CG32700	0.408473	0.00850829	0.166	0.169	1
FBgn0003435	CG9218	sm	0.426237	1.00601	0.909	0.859	1
FBgn0259789	CG12701	zld	0.428042	0.0815531	0.187	0.163	1
FBgn0262741	CR43126	lncRNA:CR43126	0.435441	0.0324678	0.112	0.093	1
FBgn0031424	CG9887	VGlut	0.438267	0.0740761	0.14	0.098	1
FBgn0029939	CG9650	CG9650	0.459964	0.18035	0.214	0.192	1
FBgn0036927	CG7433	Gabat	0.461258	-0.0314487	0.185	0.206	1
FBgn0033108	CG15236	CG15236	0.464985	0.0543892	0.105	0.092	1
FBgn0030412	CG17762	Tomosyn	0.465233	0.248662	0.528	0.437	1
FBgn0019643	CG3318	AANAT1	0.466061	0.0131799	0.152	0.138	1
FBgn0015400	CG4977	kek2	0.46617	-0.0245058	0.227	0.251	1
FBgn0031632	CG15628	CG15628	0.477265	0.0160712	0.431	0.439	1
FBgn0264442	CG43860	ab	0.491849	-0.0231185	0.109	0.123	1
FBgn0040823	CG14162	dpr6	0.498469	0.0451197	0.283	0.289	1
FBgn0263392	CG43444	Tet	0.504455	0.21682	0.741	0.701	1
FBgn0031770	CG13995	CG13995	0.511272	0.0243462	0.148	0.136	1
FBgn0001234	CR31400	lncRNA:Hsromega	0.512809	3.64104	0.991	0.98	1
FBgn0085412	CG34383	kmr	0.516161	0.0596992	0.169	0.152	1
FBgn0016061	CG31062	side	0.524471	0.0662431	0.31	0.29	1
FBgn0260660	CG42543	Mp	0.52687	0.0799877	0.415	0.399	1
FBgn0024963	CG7535	GluClalpha	0.533106	0.318619	0.697	0.601	1
FBgn0004880	CG1130	scrt	0.535545	0.447931	0.965	0.97	1
FBgn0265296	CG42256	Dscam2	0.540384	0.358275	0.803	0.768	1
FBgn0013973	CG1470	Gycbeta100B	0.547569	0.005752	0.122	0.13	1
FBgn0041605	CG32490	cpx	0.551887	0.240792	0.976	0.986	1
FBgn0000303	CG12345	ChAT	0.554286	-0.0322775	0.257	0.28	1
FBgn0031697	CG14024	CG14024	0.554785	0.00783303	0.14	0.137	1
FBgn0038839	CG10830	Ktl	0.558482	0.00130755	0.207	0.226	1
FBgn0029123	CG18024	SoxN	0.560869	0.327937	0.422	0.404	1
FBgn0033544	CG7220	CG7220	0.566447	-0.025488	0.139	0.147	1
FBgn0004611	CG4574	Plc21C	0.570399	0.0263966	0.276	0.27	1
FBgn0284245	CG8280	eEF1alpha1	0.571176	-0.00550031	0.251	0.259	1
FBgn0029814	CG15765	CG15765	0.574209	0.211001	0.527	0.484	1
FBgn0001078	CG4059	ftz-f1	0.579047	0.271179	0.444	0.408	1
FBgn0010415	CG10497	Sdc	0.580477	0.179613	0.69	0.609	1
FBgn0053147	CG33147	Hs3st-A	0.586542	0.355335	0.709	0.626	1
FBgn0260657	CG42540	CG42540	0.600617	0.635703	0.78	0.69	1
FBgn0023534	CG17778	CG17778	0.604915	0.0373665	0.188	0.176	1
FBgn0028875	CG32975	nAChRalpha5	0.61004	0.506759	0.548	0.312	1
FBgn0033405	CG13954	CG13954	0.61507	0.0117618	0.304	0.323	1
FBgn0000097	CG3166	aop	0.615371	0.126587	0.312	0.296	1
FBgn0263219	CG42330	Dscam4	0.620106	0.05469	0.223	0.22	1
FBgn0030174	CG15312	CG15312	0.643137	0.0280172	0.108	0.096	1
FBgn0014184	CG16747	Oda	0.647533	0.282609	0.618	0.519	1
FBgn0051361	CG31361	dpr17	0.655476	0.0147268	0.105	0.098	1
FBgn0033484	CG2269	CG2269	0.668898	0.020577	0.636	0.662	1
FBgn0013433	CG4846	beat-Ia	0.672761	0.0351504	0.156	0.163	1
FBgn0036851	CG14082	CG14082	0.675309	0.0506998	0.17	0.158	1
FBgn0028370	CG4192	kek3	0.678582	0.025488	0.159	0.143	1
FBgn0086758	CG31666	chinmo	0.692833	0.604205	0.723	0.65	1
FBgn0264001	CG43744	bru3	0.712978	0.382198	0.343	0.18	1
FBgn0037874	CG4800	Tctp	0.716242	0.0491406	0.411	0.417	1
FBgn0027589	CG1688	CG1688	0.716358	0.0391222	0.219	0.203	1
FBgn0053143	CG33143	CG33143	0.716789	0.00176182	0.379	0.396	1
FBgn0002593	CG4087	RpLP1	0.717651	-0.319165	0.773	0.854	1
FBgn0285944	CG9907	para	0.717832	1.47937	0.907	0.83	1
FBgn0004635	CG1004	rho	0.729278	0.0199754	0.126	0.134	1
FBgn0050463	CG30463	Pgant9	0.747033	0.0478207	0.126	0.113	1
FBgn0010473	CG15427	tutl	0.758201	0.409632	0.676	0.597	1
FBgn0266851	CR45312	lncRNA:CR45312	0.769803	-0.0115592	0.193	0.199	1
FBgn0040726	CG13439	dpr1	0.770209	0.225513	0.515	0.494	1
FBgn0085370	CG34341	Pde11	0.790361	-0.00187231	0.099	0.101	1
FBgn0052183	CG32183	Ccn	0.798602	0.00650706	0.169	0.169	1
FBgn0039647	CG14509	jus	0.825524	0.0957888	0.267	0.244	1
FBgn0000024	CG17907	Ace	0.846346	0.512001	0.628	0.504	1
FBgn0028496	CG30116	CG30116	0.849658	0.0432658	0.239	0.221	1
FBgn0250839	CG2016	CG2016	0.852978	-0.0355617	0.11	0.119	1
FBgn0260943	CG32169	Rbp6	0.877625	0.984156	0.94	0.881	1
FBgn0000116	CG32031	Argk	0.877865	0.201737	0.639	0.606	1
FBgn0039584	CG14064	beat-VI	0.888611	0.0207735	0.166	0.161	1
FBgn0259213	CG42313	side-II	0.893806	0.106624	0.576	0.571	1
FBgn0263289	CG43398	scrib	0.901934	0.0330939	0.156	0.149	1
FBgn0029897	CG3203	RpL17	0.902746	-0.213511	0.653	0.688	1
FBgn0085414	CG34385	dpr12	0.908131	0.0931246	0.352	0.34	1
FBgn0085421	CG34392	Epac	0.917031	0.0709761	0.297	0.307	1
FBgn0010411	CG8900	RpS18	0.920175	-0.483008	0.866	0.927	1
FBgn0034138	CG8332	RpS15	0.925981	-0.390565	0.861	0.889	1
FBgn0001235	CG17117	hth	0.933498	0.228858	0.327	0.228	1
FBgn0264606	CG43955	Fife	0.935911	0.110884	0.345	0.317	1
FBgn0017590	CG6669	klg	0.941676	0.0160958	0.261	0.253	1
FBgn0263980	CG43729	Stacl	0.941936	0.081768	0.75	0.742	1
FBgn0038237	CG8279	Pde6	0.942626	0.174223	0.33	0.288	1
FBgn0261244	CG33174	inaE	0.944437	0.0508717	0.362	0.353	1
FBgn0259216	CG42316	RhoGAP102A	0.951406	0.0212523	0.114	0.114	1
FBgn0000179	CG3578	bi	0.953903	0.144923	0.223	0.213	1
FBgn0003360	CG16944	sesB	0.958382	0.0435298	0.783	0.79	1
FBgn0000635	CG3665	Fas2	0.963586	0.0357152	0.102	0.099	1
FBgn0010313	CG2530	corto	0.96396	0.0267403	0.23	0.227	1
FBgn0265597	CG44424	rad	0.980275	0.169306	0.263	0.203	1
FBgn0027654	CG2239	jdp	0.982224	0.0672069	0.456	0.439	1
FBgn0038498	CG14334	beat-IIa	0.986683	0.353174	0.487	0.483	1
FBgn0264087	CG43756	Slob	0.990524	0.0470595	0.325	0.327	1

## Sheet: Female_C9
FlyBaseID	GeneID	Gene symbol	p_val	avg_diff	pct.1	pct.2	p_val_adj
FBgn0019660	CR32665	lncRNA:roX2	3.7823e-128	-1.91585	0.003	0.718	5.67345e-125
FBgn0085753	CR40596	28SrRNA-Psi:CR40596	4.36793e-28	0.124148	0.13	0.032	6.55189e-25
FBgn0013688	CR34096	mt:srRNA	8.4572e-26	0.106073	0.116	0.032	1.26858e-22
FBgn0002940	CG4550	ninaE	4.0401e-11	-0.365095	0.088	0.158	6.06014e-08
FBgn0033987	CG12424	ckn	3.01483e-10	0.032993	0.104	0.072	4.52224e-07
FBgn0004573	CG12073	5-HT7	3.36711e-09	0.0499831	0.108	0.062	5.05067e-06
FBgn0052683	CG32683	CG32683	3.64086e-09	0.151409	0.242	0.166	5.46129e-06
FBgn0029768	CG16752	SPR	5.31705e-09	0.15425	0.196	0.101	7.97557e-06
FBgn0011693	CG4899	Pdh	8.81733e-09	-0.114108	0.035	0.101	1.3226e-05
FBgn0004395	CG4620	unk	8.94447e-09	0.13895	0.198	0.105	1.34167e-05
FBgn0259170	CG42275	alpha-Man-Ia	2.61967e-08	0.163424	0.246	0.151	3.92951e-05
FBgn0261953	CG7807	TfAP-2	2.63944e-08	0.107898	0.14	0.066	3.95915e-05
FBgn0004516	CG14994	Gad1	2.66786e-08	1.88712	0.905	0.857	4.00179e-05
FBgn0003301	CG9533	rut	4.02359e-08	0.113864	0.21	0.13	6.03538e-05
FBgn0013718	CG33991	nuf	2.07963e-07	0.0483506	0.118	0.076	0.000311944
FBgn0029824	CG3726	CG3726	2.40671e-07	0.287814	0.394	0.254	0.000361007
FBgn0265416	CG44328	Neto	2.54693e-07	0.0435481	0.102	0.059	0.000382039
FBgn0033403	CG13739	CG13739	3.7771e-07	0.901605	0.547	0.393	0.000566565
FBgn0264753	CG44011	Rgk1	5.46241e-07	0.0525571	0.104	0.063	0.000819361
FBgn0085399	CG34370	CG34370	5.90619e-07	0.129107	0.236	0.146	0.000885928
FBgn0004652	CG14307	fru	6.83306e-07	0.287955	0.277	0.111	0.00102496
FBgn0085413	CG34384	CG34384	1.05399e-06	0.249783	0.425	0.307	0.00158098
FBgn0283651	CG46301	CG46301	1.27216e-06	0.0524131	0.111	0.067	0.00190824
FBgn0042696	CG2380	NfI	1.28571e-06	0.183699	0.279	0.175	0.00192857
FBgn0038246	CG14853	CG14853	1.40789e-06	0.0825527	0.161	0.095	0.00211183
FBgn0052521	CG32521	CG32521	2.20971e-06	0.156499	0.251	0.167	0.00331456
FBgn0013995	CG5685	Calx	2.81738e-06	0.150747	0.188	0.118	0.00422607
FBgn0052057	CG32057	dpr10	3.86825e-06	0.0544977	0.127	0.078	0.00580238
FBgn0001225	CG4183	Hsp26	3.97092e-06	-0.217833	0.063	0.145	0.00595639
FBgn0065099	CR33925	snRNA:7SK	9.00172e-06	3.67293	0.703	0.484	0.0135026
FBgn0085397	CG34368	Fili	9.87165e-06	0.0661299	0.178	0.117	0.0148075
FBgn0058469	CR40469	lncRNA:CR40469	1.05765e-05	0.08407	0.14	0.088	0.0158648
FBgn0033356	CG8229	CG8229	1.18059e-05	-0.0870893	0.117	0.184	0.0177089
FBgn0260442	CG6831	rhea	1.34297e-05	0.0479764	0.139	0.093	0.0201445
FBgn0025382	CG14791	Rab27	1.5806e-05	-0.00130394	0.088	0.108	0.0237091
FBgn0020621	CG2049	Pkn	2.29824e-05	0.0498391	0.115	0.068	0.0344735
FBgn0031016	CG12199	kek5	2.43822e-05	0.0806035	0.181	0.113	0.0365733
FBgn0260971	CG42594	CG42594	2.79807e-05	0.175842	0.221	0.122	0.0419711
FBgn0267322	CR45758	lncRNA:CR45758	3.57519e-05	0.0431162	0.111	0.079	0.0536278
FBgn0036789	CG13702	AstC-R2	3.67089e-05	0.057446	0.102	0.062	0.0550633
FBgn0015766	CG10596	Msr-110	4.92116e-05	0.0534986	0.116	0.067	0.0738174
FBgn0011676	CG6713	Nos	5.97465e-05	0.469293	0.287	0.203	0.0896198
FBgn0029663	CG10804	CG10804	0.000107436	0.486685	0.665	0.524	0.161154
FBgn0027356	CG8604	Amph	0.000118193	0.049917	0.151	0.114	0.17729
FBgn0261260	CG42611	mgl	0.00012143	0.0678199	0.158	0.117	0.182144
FBgn0085385	CG34356	bma	0.000131685	0.115525	0.156	0.096	0.197528
FBgn0039349	CG4685	Ssadh	0.000134584	-0.165178	0.275	0.375	0.201876
FBgn0037963	CG6977	Cad87A	0.000211714	0.052154	0.117	0.074	0.317571
FBgn0250867	CG42238	CG42238	0.000229901	0.116709	0.284	0.207	0.344852
FBgn0011666	CG5099	msi	0.000236121	1.23265	0.825	0.633	0.354182
FBgn0023095	CG11282	caps	0.00037264	0.0914668	0.212	0.151	0.55896
FBgn0265052	CG44167	St3	0.000447515	0.0985555	0.245	0.178	0.671273
FBgn0036821	CG3961	CG3961	0.000496815	0.101915	0.143	0.086	0.745223
FBgn0019662	CG8593	qm	0.000554268	0.0794317	0.161	0.109	0.831402
FBgn0036725	CG18265	CG18265	0.000629419	0.0127955	0.121	0.112	0.944128
FBgn0035756	CG32381	unc-13-4A	0.000651099	0.00691933	0.176	0.159	0.976648
FBgn0029123	CG18024	SoxN	0.000764081	0.304791	0.416	0.342	1
FBgn0260753	CG13758	Pdfr	0.000764255	0.0651104	0.122	0.078	1
FBgn0028875	CG32975	nAChRalpha5	0.000768795	1.05924	0.772	0.703	1
FBgn0030412	CG17762	Tomosyn	0.000781136	0.520416	0.753	0.628	1
FBgn0000567	CG32180	Eip74EF	0.000811625	0.0474091	0.102	0.062	1
FBgn0259677	CG42346	CG42346	0.000974678	0.042339	0.134	0.105	1
FBgn0052206	CG32206	CG32206	0.00104562	0.0934075	0.22	0.17	1
FBgn0265595	CG44422	CG44422	0.00121843	0.242297	0.256	0.155	1
FBgn0264895	CG44086	RapGAP1	0.00134395	0.512909	0.604	0.555	1
FBgn0033438	CG1794	Mmp2	0.00141958	0.09409	0.232	0.179	1
FBgn0051092	CG31092	LpR2	0.00152676	0.099514	0.151	0.091	1
FBgn0004619	CG8442	GluRIA	0.00175488	0.173366	0.279	0.196	1
FBgn0031299	CG4629	CG4629	0.0017857	0.0603282	0.157	0.114	1
FBgn0004595	CG17228	pros	0.00189874	0.459886	0.821	0.759	1
FBgn0003326	CG17579	sca	0.00191131	0.0223515	0.108	0.084	1
FBgn0004858	CG4220	elB	0.00194163	0.0773962	0.196	0.138	1
FBgn0040297	CG9256	Nhe2	0.00196242	0.07363	0.153	0.095	1
FBgn0024189	CG33141	sns	0.0028343	0.0395634	0.149	0.118	1
FBgn0001085	CG17697	fz	0.00369557	0.121002	0.241	0.183	1
FBgn0284243	CG9277	betaTub56D	0.00384859	-0.0256232	0.353	0.388	1
FBgn0013686	CR34094	mt:lrRNA	0.00442369	8.47665	0.875	0.542	1
FBgn0002868	CG9470	MtnA	0.00501049	0.408657	0.278	0.183	1
FBgn0261928	CG42795	CG42795	0.00544901	0.19809	0.355	0.264	1
FBgn0262473	CG5490	Tl	0.00589843	0.0803444	0.17	0.134	1
FBgn0285944	CG9907	para	0.0059093	1.52774	0.878	0.801	1
FBgn0011656	CG1429	Mef2	0.00640266	0.0454142	0.22	0.178	1
FBgn0261649	CG31247	tinc	0.00689802	0.0463439	0.134	0.101	1
FBgn0019985	CG11144	mGluR	0.00737609	0.150652	0.283	0.203	1
FBgn0010300	CG10719	brat	0.00765666	0.157239	0.283	0.189	1
FBgn0085380	CG34351	CG34351	0.00799048	0.0542014	0.166	0.134	1
FBgn0250908	CG42242	beat-VII	0.00807424	0.0466013	0.311	0.336	1
FBgn0000037	CG4356	mAChR-A	0.00859157	0.326627	0.483	0.454	1
FBgn0264000	CG43743	GluRIB	0.00865777	0.301436	0.417	0.312	1
FBgn0261285	CG5629	Ppcs	0.00895496	0.0430502	0.163	0.121	1
FBgn0051324	CG31324	CG31324	0.00936366	0.167585	0.309	0.232	1
FBgn0004369	CG11516	Ptp99A	0.00972031	0.406659	0.625	0.589	1
FBgn0011818	CG9884	oaf	0.0099623	0.0144771	0.138	0.132	1
FBgn0029814	CG15765	CG15765	0.0111148	0.37048	0.458	0.405	1
FBgn0002643	CG8118	mam	0.0111403	0.107507	0.242	0.176	1
FBgn0038282	CG33485	dpr9	0.011181	0.206054	0.387	0.311	1
FBgn0261836	CG42768	Msp300	0.0111997	0.987194	0.831	0.754	1
FBgn0263220	CG43388	Hk	0.0113262	0.600124	0.78	0.661	1
FBgn0052406	CG32406	PVRAP	0.0115565	0.0504471	0.199	0.166	1
FBgn0266756	CG44012	btsz	0.011714	0.0758874	0.134	0.092	1
FBgn0015777	CG9261	nrv2	0.0118698	0.0422441	0.161	0.13	1
FBgn0037521	CG2993	CG2993	0.0119956	0.156647	0.371	0.283	1
FBgn0013973	CG1470	Gycbeta100B	0.0122733	0.0588397	0.156	0.113	1
FBgn0260003	CG34157	Dys	0.0129353	0.0746579	0.156	0.111	1
FBgn0002023	CG10699	Lim3	0.0131704	0.214076	0.453	0.383	1
FBgn0263995	CG43738	cpo	0.0133385	0.446158	0.673	0.559	1
FBgn0259171	CG42276	Pde9	0.0135767	-0.0432924	0.421	0.468	1
FBgn0259212	CG42312	cno	0.0139683	0.032849	0.103	0.083	1
FBgn0004198	CG11387	ct	0.0140766	0.991594	0.71	0.578	1
FBgn0033544	CG7220	CG7220	0.0145135	-0.0956259	0.189	0.258	1
FBgn0086604	CG12484	side-VIII	0.0151446	0.0885474	0.19	0.147	1
FBgn0023534	CG17778	CG17778	0.0151758	0.0748425	0.239	0.188	1
FBgn0001186	CG3001	Hex-A	0.015182	0.749558	0.695	0.478	1
FBgn0052698	CG32698	CARPB	0.0156428	0.220939	0.248	0.193	1
FBgn0000064	CG6058	Ald1	0.0156654	-1.01995	0.78	0.845	1
FBgn0261556	CG42674	CG42674	0.0160507	-0.251741	0.202	0.258	1
FBgn0263706	CG43658	CG43658	0.0177127	0.0405626	0.149	0.122	1
FBgn0020269	CG10145	mspo	0.0183479	0.0619437	0.211	0.179	1
FBgn0032901	CG9339	sky	0.0193918	0.0145736	0.443	0.467	1
FBgn0262782	CG5362	Mdh1	0.0213153	-0.0981796	0.237	0.293	1
FBgn0267668	CR46006	lncRNA:CR46006	0.0213994	0.18589	0.287	0.222	1
FBgn0085410	CG34381	TrissinR	0.022176	0.00270101	0.103	0.096	1
FBgn0052432	CG32432	CG32432	0.0222576	0.157119	0.4	0.337	1
FBgn0038665	CG12269	euc	0.0228575	0.0862122	0.127	0.087	1
FBgn0267033	CG45477	mamo	0.0232173	1.00757	0.681	0.633	1
FBgn0030913	CG6123	CG6123	0.024318	0.0942999	0.149	0.108	1
FBgn0085409	CG34380	smal	0.0248146	0.0807102	0.202	0.15	1
FBgn0051690	CG31690	CG31690	0.0249308	0.130155	0.26	0.197	1
FBgn0023179	CG6438	amon	0.0249533	0.207415	0.351	0.275	1
FBgn0261988	CG17998	Gprk2	0.025072	0.228036	0.391	0.263	1
FBgn0033926	CG12505	Arc1	0.0252151	0.10303	0.149	0.097	1
FBgn0031374	CG7337	Wdr62	0.02643	0.147814	0.422	0.362	1
FBgn0260793	CG42573	2mit	0.0264365	0.041245	0.172	0.142	1
FBgn0261574	CG7749	kug	0.027423	0.0536917	0.145	0.116	1
FBgn0031381	CG7291	Npc2a	0.0278751	-0.0348032	0.116	0.126	1
FBgn0051221	CG31221	CG31221	0.028337	0.380419	0.524	0.379	1
FBgn0031736	CG11030	CG11030	0.0285425	0.00109734	0.107	0.112	1
FBgn0264386	CG15899	Ca-alpha1T	0.0297621	0.927139	0.588	0.425	1
FBgn0266801	CG45263	CG45263	0.0306081	-0.117373	0.472	0.539	1
FBgn0000489	CG6117	Pka-C3	0.0308949	0.0785477	0.112	0.074	1
FBgn0264005	CG43748	Hmx	0.0309826	0.0594154	0.136	0.096	1
FBgn0011224	CG31000	heph	0.0310289	0.951656	0.593	0.475	1
FBgn0266871	CR45332	lncRNA:CR45332	0.0319241	0.00141739	0.21	0.201	1
FBgn0004509	CG10772	Fur1	0.0324426	0.0359039	0.135	0.105	1
FBgn0004910	CG15855	Eip63F-1	0.0329103	0.202699	0.322	0.257	1
FBgn0029003	CG4746	mab-21	0.0334529	0.0731525	0.25	0.197	1
FBgn0031697	CG14024	CG14024	0.0338473	0.0287204	0.157	0.133	1
FBgn0000179	CG3578	bi	0.0342775	0.364384	0.302	0.243	1
FBgn0038156	CG14372	side-IV	0.036037	0.0630952	0.188	0.153	1
FBgn0051708	CG31708	DIP-zeta	0.0368434	0.160619	0.158	0.116	1
FBgn0015519	CG2302	nAChRalpha3	0.0371676	0.124114	0.245	0.188	1
FBgn0033108	CG15236	CG15236	0.0393474	0.188353	0.34	0.284	1
FBgn0037546	CG7918	mAChR-B	0.039801	0.089008	0.185	0.145	1
FBgn0039209	CG13624	REPTOR	0.0398337	0.12564	0.246	0.178	1
FBgn0285963	CG46339	CG46339	0.040192	0.0244649	0.121	0.104	1
FBgn0033196	CG1358	CG1358	0.0403931	0.0584739	0.117	0.083	1
FBgn0041629	CG1787	Hexo2	0.0407182	0.0343291	0.142	0.12	1
FBgn0261698	CG42732	SLO2	0.041483	0.141922	0.327	0.268	1
FBgn0261549	CG42667	rdgA	0.0415773	0.133535	0.207	0.138	1
FBgn0262018	CG42829	CadN2	0.0423855	0.0403814	0.199	0.178	1
FBgn0036927	CG7433	Gabat	0.0424483	-0.0488298	0.314	0.363	1
FBgn0262593	CG43128	Shab	0.0438951	0.24336	0.465	0.364	1
FBgn0264308	CG43778	CG43778	0.044312	0.135418	0.246	0.188	1
FBgn0035092	CG3441	Nplp1	0.0457156	0.444075	0.34	0.287	1
FBgn0000121	CG5962	Arr2	0.04666	-0.252196	0.084	0.112	1
FBgn0001091	CG12055	Gapdh1	0.0467424	-0.273567	0.409	0.496	1
FBgn0053639	CG33639	CG33639	0.0468298	0.0546992	0.107	0.074	1
FBgn0038498	CG14334	beat-IIa	0.0468536	0.211547	0.338	0.263	1
FBgn0259234	CG42332	Camta	0.0501083	0.0321005	0.136	0.113	1
FBgn0085420	CG34391	DIP-delta	0.0513241	0.213879	0.236	0.193	1
FBgn0085447	CG34418	sif	0.0515143	0.900679	0.761	0.545	1
FBgn0034286	CG33996	dpr13	0.052656	0.165737	0.368	0.303	1
FBgn0000547	CG12676	ed	0.0536845	0.157412	0.228	0.174	1
FBgn0038494	CG4135	beat-IIb	0.0573842	0.0616152	0.136	0.109	1
FBgn0038980	CG6919	Octbeta1R	0.0589643	0.0902781	0.23	0.183	1
FBgn0250910	CG42244	Octbeta3R	0.0601061	0.0118743	0.148	0.139	1
FBgn0033159	CG17800	Dscam1	0.0642497	0.0244937	0.116	0.108	1
FBgn0083949	CG34113	side-III	0.0647166	0.149289	0.429	0.359	1
FBgn0284245	CG8280	eEF1alpha1	0.0649352	-0.0253065	0.368	0.404	1
FBgn0259242	CG42340	CG42340	0.0662373	0.0382883	0.223	0.214	1
FBgn0040823	CG14162	dpr6	0.0674385	-0.0567076	0.206	0.257	1
FBgn0035816	CG13685	CG13685	0.0683291	0.0362409	0.162	0.138	1
FBgn0040397	CG3655	CG3655	0.0683598	0.048083	0.156	0.126	1
FBgn0051163	CG31163	SKIP	0.0685923	0.101446	0.212	0.159	1
FBgn0086758	CG31666	chinmo	0.0691657	0.202195	0.622	0.542	1
FBgn0035499	CG14996	Chd64	0.0700087	0.0319854	0.131	0.109	1
FBgn0028496	CG30116	CG30116	0.0707901	0.154952	0.417	0.382	1
FBgn0264001	CG43744	bru3	0.0729627	0.485665	0.458	0.349	1
FBgn0036144	CG6207	GlcAT-P	0.0738643	0.0504843	0.18	0.145	1
FBgn0027546	CG4766	CG4766	0.0787051	0.053778	0.157	0.121	1
FBgn0085383	CG34354	CG34354	0.0818602	0.110504	0.225	0.175	1
FBgn0028704	CG18660	Nckx30C	0.0821843	0.522822	0.781	0.753	1
FBgn0052626	CG32626	AMPdeam	0.0832511	-0.043504	0.166	0.2	1
FBgn0003423	CG1417	slgA	0.0844002	0.320631	0.739	0.655	1
FBgn0050089	CG30089	CG30089	0.0854116	0.00732236	0.158	0.168	1
FBgn0085395	CG34366	Shawl	0.0874704	0.0309117	0.207	0.179	1
FBgn0040805	CG12355	CG12355	0.088416	-0.0597829	0.166	0.214	1
FBgn0265296	CG42256	Dscam2	0.0889847	0.510643	0.759	0.707	1
FBgn0039647	CG14509	jus	0.0889948	0.17086	0.483	0.462	1
FBgn0032400	CG6770	CG6770	0.0902162	0.0263564	0.592	0.564	1
FBgn0013733	CG18076	shot	0.0911755	0.104225	0.329	0.267	1
FBgn0016061	CG31062	side	0.0944114	0.219198	0.405	0.366	1
FBgn0083228	CG5907	Frq2	0.0944687	0.0544689	0.116	0.079	1
FBgn0267336	CG34360	Glut4EF	0.100732	0.83394	0.83	0.78	1
FBgn0029939	CG9650	CG9650	0.101273	0.254594	0.323	0.266	1
FBgn0285926	CG1691	Imp	0.101835	0.0902747	0.116	0.082	1
FBgn0052600	CG32600	dpr8	0.101961	0.189631	0.384	0.307	1
FBgn0085400	CG34371	side-V	0.103535	0.0837076	0.206	0.186	1
FBgn0000097	CG3166	aop	0.106214	0.0801717	0.184	0.146	1
FBgn0052017	CG32017	CG32017	0.109778	0.480543	0.739	0.647	1
FBgn0266100	CG44837	CG44837	0.110832	0.0624992	0.158	0.129	1
FBgn0040726	CG13439	dpr1	0.111443	0.170536	0.322	0.275	1
FBgn0052506	CG32506	CG32506	0.111844	0.0316027	0.193	0.172	1
FBgn0028645	CG7644	beat-Ib	0.112193	0.0218773	0.264	0.246	1
FBgn0263397	CG8585	Ih	0.114877	0.554476	0.869	0.788	1
FBgn0019643	CG3318	AANAT1	0.115749	-0.0312403	0.35	0.382	1
FBgn0260462	CG12163	CG12163	0.122259	-0.0143467	0.104	0.107	1
FBgn0263980	CG43729	Stacl	0.126754	-0.181073	0.404	0.429	1
FBgn0030272	CG15201	CG15201	0.127472	0.190779	0.17	0.128	1
FBgn0030897	CG5744	Frq1	0.128219	0.594024	0.556	0.421	1
FBgn0051361	CG31361	dpr17	0.12834	0.0493125	0.156	0.125	1
FBgn0001235	CG17117	hth	0.129466	0.850273	0.674	0.596	1
FBgn0000036	CG5610	nAChRalpha1	0.131699	0.106515	0.363	0.363	1
FBgn0019650	CG11186	toy	0.133351	-0.0576661	0.211	0.251	1
FBgn0030158	CG9686	CG9686	0.134151	0.100052	0.107	0.083	1
FBgn0036801	CG6896	MYPT-75D	0.135396	0.0989789	0.227	0.179	1
FBgn0260943	CG32169	Rbp6	0.13556	0.73113	0.86	0.816	1
FBgn0262614	CG43140	pyd	0.137226	0.0748798	0.161	0.124	1
FBgn0010452	CG11280	trn	0.13891	0.0122401	0.162	0.143	1
FBgn0263257	CG43395	Cngl	0.144605	0.804843	0.615	0.526	1
FBgn0005558	CG1464	ey	0.145461	0.0328981	0.115	0.105	1
FBgn0052066	CG32066	CG32066	0.147046	0.0356736	0.135	0.122	1
FBgn0038063	CG33976	Octbeta2R	0.149828	0.279552	0.494	0.432	1
FBgn0030723	CG14948	dpr18	0.15257	0.0412738	0.169	0.15	1
FBgn0052677	CG32677	X11Lbeta	0.154464	0.129706	0.341	0.263	1
FBgn0005775	CG7503	Con	0.15552	0.554164	0.472	0.355	1
FBgn0031632	CG15628	CG15628	0.155795	-0.11258	0.372	0.429	1
FBgn0033405	CG13954	CG13954	0.156204	0.0994801	0.305	0.257	1
FBgn0010473	CG15427	tutl	0.158806	0.144622	0.523	0.467	1
FBgn0259935	CG42458	CG42458	0.162087	0.0464303	0.107	0.079	1
FBgn0050463	CG30463	Pgant9	0.163717	0.0418987	0.185	0.164	1
FBgn0034138	CG8332	RpS15	0.166616	-0.486866	0.87	0.934	1
FBgn0033268	CG2297	Obp44a	0.168332	0.460266	0.239	0.246	1
FBgn0025885	CG11143	Inos	0.171754	-0.0167192	0.088	0.103	1
FBgn0041097	CG5423	robo3	0.171978	0.0633459	0.212	0.182	1
FBgn0028481	CG4341	CG4341	0.172933	0.141672	0.275	0.224	1
FBgn0035495	CG14989	CG14989	0.173291	0.771959	1	1	1
FBgn0260658	CG42541	CG42541	0.174384	-0.349179	0.48	0.517	1
FBgn0004168	CG16720	5-HT1A	0.175517	0.0969146	0.214	0.179	1
FBgn0032629	CG15138	beat-IIIc	0.180503	0.0455378	0.142	0.111	1
FBgn0283499	CG18402	InR	0.184828	0.0710476	0.172	0.137	1
FBgn0263219	CG42330	Dscam4	0.185019	0.101268	0.342	0.289	1
FBgn0027598	CG31012	cindr	0.185097	0.353009	0.605	0.493	1
FBgn0032151	CG4128	nAChRalpha6	0.187776	0.627669	0.65	0.53	1
FBgn0085414	CG34385	dpr12	0.188033	0.0246528	0.272	0.239	1
FBgn0000535	CG10952	eag	0.188395	0.133316	0.3	0.251	1
FBgn0085382	CG34353	CG34353	0.188437	0.0193372	0.136	0.126	1
FBgn0029897	CG3203	RpL17	0.191736	-0.443082	0.732	0.791	1
FBgn0086677	CG30040	jeb	0.199181	0.265392	0.342	0.284	1
FBgn0010434	CG11949	cora	0.199414	0.0327051	0.112	0.087	1
FBgn0036844	CG14080	Mkp3	0.200649	0.0473701	0.376	0.362	1
FBgn0028369	CG3653	kirre	0.20324	0.252604	0.331	0.251	1
FBgn0003274	CG4918	RpLP2	0.205383	-0.140395	0.605	0.626	1
FBgn0015229	CG6575	glec	0.205885	0.0954955	0.347	0.299	1
FBgn0263930	CG4974	dally	0.206484	-0.0401375	0.272	0.32	1
FBgn0262160	CG9932	CG9932	0.208553	0.151343	0.273	0.199	1
FBgn0010412	CG4464	RpS19a	0.209398	0.0374738	0.283	0.266	1
FBgn0031306	CG4577	CG4577	0.210284	0.117688	0.176	0.133	1
FBgn0085391	CG34362	trv	0.210384	0.647876	0.53	0.382	1
FBgn0030090	CG12664	fend	0.210459	-0.00125483	0.546	0.57	1
FBgn0028370	CG4192	kek3	0.213112	-0.0135863	0.156	0.174	1
FBgn0261262	CG42613	CG42613	0.213381	0.567569	0.596	0.409	1
FBgn0013981	CG3379	His4r	0.216238	-0.176707	0.92	0.92	1
FBgn0036935	CG14186	CG14186	0.216542	0.0495919	0.194	0.162	1
FBgn0286778	CG46385	CG46385	0.218726	0.101429	0.274	0.229	1
FBgn0000411	CG5893	D	0.219839	-0.0243345	0.095	0.117	1
FBgn0051760	CG31760	CG31760	0.221833	0.0545096	0.18	0.164	1
FBgn0000422	CG10697	Ddc	0.221884	0.0565654	0.197	0.155	1
FBgn0015609	CG7100	CadN	0.222556	0.229874	0.416	0.322	1
FBgn0026160	CG7958	tna	0.22343	0.298364	0.471	0.358	1
FBgn0015774	CG10521	NetB	0.224791	0.0648716	0.153	0.117	1
FBgn0037913	CG6783	fabp	0.225132	-0.0294334	0.135	0.161	1
FBgn0267001	CG42338	Ten-a	0.227569	1.45946	0.865	0.728	1
FBgn0266851	CR45312	lncRNA:CR45312	0.229455	-0.204621	0.439	0.48	1
FBgn0003091	CG6622	Pkc53E	0.238469	0.428314	0.505	0.372	1
FBgn0040532	CG8369	CG8369	0.239951	0.189936	0.208	0.168	1
FBgn0259111	CG42253	Ndae1	0.239953	0.0385643	0.129	0.108	1
FBgn0016797	CG9739	fz2	0.240139	0.0291726	0.16	0.147	1
FBgn0032666	CG5758	CG5758	0.245941	0.0829015	0.26	0.218	1
FBgn0030432	CG4404	CG4404	0.246227	0.0279228	0.142	0.118	1
FBgn0027608	CG2082	CG2082	0.249956	-0.0619471	0.333	0.366	1
FBgn0035173	CG13907	CG13907	0.250582	0.00790659	0.104	0.097	1
FBgn0259243	CG42341	Pka-R1	0.2547	0.0765613	0.223	0.175	1
FBgn0011582	CG9652	Dop1R1	0.256597	-0.00578643	0.181	0.191	1
FBgn0045038	CG7105	Proc	0.257526	0.0280905	0.196	0.172	1
FBgn0034408	CG12758	sano	0.257601	0.0182314	0.109	0.091	1
FBgn0000303	CG12345	ChAT	0.259547	-0.0484421	0.085	0.117	1
FBgn0262509	CG43079	nrm	0.259804	0.0340412	0.147	0.12	1
FBgn0261046	CG31190	Dscam3	0.260393	0.0673305	0.142	0.12	1
FBgn0001078	CG4059	ftz-f1	0.262952	0.19765	0.381	0.311	1
FBgn0037153	CG12673	olf413	0.268108	0.0146041	0.189	0.211	1
FBgn0259244	CG42342	CG42342	0.271057	0.0183855	0.356	0.328	1
FBgn0039584	CG14064	beat-VI	0.274458	-0.0295485	0.145	0.172	1
FBgn0015400	CG4977	kek2	0.277504	0.138151	0.351	0.318	1
FBgn0031971	CG7224	Sirup	0.284193	0.034263	0.194	0.17	1
FBgn0004449	CG5723	Ten-m	0.284974	0.0815569	0.248	0.212	1
FBgn0259245	CG42343	DIP-beta	0.286066	0.0624619	0.138	0.118	1
FBgn0083963	CG34127	Nlg3	0.290047	0.0120301	0.579	0.596	1
FBgn0032797	CG10186	Hasp	0.291432	-0.697729	0.923	0.938	1
FBgn0030574	CG9413	sbm	0.292362	0.0308051	0.175	0.155	1
FBgn0243512	CG7850	puc	0.298456	0.0270016	0.175	0.159	1
FBgn0264442	CG43860	ab	0.298981	-0.0610614	0.109	0.128	1
FBgn0039420	CG6154	CG6154	0.29911	0.0952906	0.207	0.175	1
FBgn0263353	CG11000	CG11000	0.304926	0.0723616	0.414	0.392	1
FBgn0001234	CR31400	lncRNA:Hsromega	0.307107	2.58178	0.97	0.979	1
FBgn0004606	CG1322	zfh1	0.30775	0.0493785	0.109	0.082	1
FBgn0003429	CG10693	slo	0.307845	0.414492	0.65	0.58	1
FBgn0259821	CG42402	CG42402	0.314302	0.175566	0.232	0.179	1
FBgn0036454	CG17839	CG17839	0.314959	0.0734404	0.221	0.189	1
FBgn0005771	CG4491	noc	0.317469	-0.025083	0.158	0.171	1
FBgn0083991	CG34155	CG34155	0.320249	0.0300362	0.121	0.112	1
FBgn0038321	CG6218	CG6218	0.321007	-0.0240466	0.103	0.133	1
FBgn0031770	CG13995	CG13995	0.328311	0.050525	0.236	0.216	1
FBgn0034636	CG10440	twz	0.331219	-0.00201179	0.158	0.174	1
FBgn0037676	CG8861	CG8861	0.332866	0.384939	0.502	0.467	1
FBgn0260429	CG42524	CG42524	0.332993	-0.0013903	0.107	0.111	1
FBgn0039089	CG10152	beat-IV	0.333046	0.0554833	0.3	0.267	1
FBgn0002945	CG11614	nkd	0.335178	0.108	0.308	0.267	1
FBgn0000108	CG7727	Appl	0.338611	0.492105	0.768	0.689	1
FBgn0034978	CG3257	CG3257	0.33983	0.0314587	0.203	0.179	1
FBgn0041605	CG32490	cpx	0.344633	-0.541487	0.99	0.996	1
FBgn0053517	CG33517	Dop2R	0.348094	0.32722	0.566	0.522	1
FBgn0010415	CG10497	Sdc	0.351899	0.130659	0.707	0.703	1
FBgn0266418	CG45058	wake	0.352979	0.0244073	0.122	0.1	1
FBgn0264606	CG43955	Fife	0.354113	0.00855348	0.398	0.384	1
FBgn0000024	CG17907	Ace	0.355161	0.178731	0.426	0.35	1
FBgn0003651	CG11502	svp	0.356362	0.032783	0.148	0.124	1
FBgn0260660	CG42543	Mp	0.357496	0.0919833	0.358	0.325	1
FBgn0263997	CG43740	CG43740	0.359915	0.0191729	0.122	0.108	1
FBgn0262738	CG3620	norpA	0.360314	0.00306001	0.479	0.468	1
FBgn0250839	CG2016	CG2016	0.365603	-0.00937987	0.107	0.122	1
FBgn0053147	CG33147	Hs3st-A	0.368113	0.152144	0.391	0.316	1
FBgn0027339	CG11352	jim	0.368546	1.61855	0.94	0.879	1
FBgn0052264	CG32264	CG32264	0.372876	0.575879	0.786	0.672	1
FBgn0031424	CG9887	VGlut	0.374196	0.0440188	0.203	0.154	1
FBgn0024841	CG1963	Pcd	0.374943	-0.00345458	0.134	0.132	1
FBgn0263773	CG43690	fok	0.377668	0.0409774	0.221	0.191	1
FBgn0051619	CG31619	nolo	0.378153	0.0398716	0.169	0.141	1
FBgn0263392	CG43444	Tet	0.381306	0.167806	0.676	0.663	1
FBgn0262737	CG7437	mub	0.384619	0.933366	0.722	0.613	1
FBgn0265598	CG44425	Bx	0.386289	0.0457224	0.166	0.139	1
FBgn0038237	CG8279	Pde6	0.387216	0.145675	0.447	0.432	1
FBgn0264087	CG43756	Slob	0.387357	-0.00484488	0.189	0.214	1
FBgn0259213	CG42313	side-II	0.387881	0.0602554	0.454	0.428	1
FBgn0264574	CG43946	Glut1	0.389438	0.107432	0.287	0.255	1
FBgn0264908	CG44099	pHCl-1	0.389549	0.113559	0.211	0.179	1
FBgn0262869	CG43224	Gfrl	0.391603	0.160396	0.326	0.295	1
FBgn0020907	CG14904	Scp2	0.395533	-0.034324	0.148	0.176	1
FBgn0039380	CG5890	CG5890	0.396844	-0.0210171	0.26	0.27	1
FBgn0052204	CG32204	CG32204	0.405114	0.0396498	0.125	0.116	1
FBgn0283451	CG11491	br	0.408089	0.100381	0.139	0.116	1
FBgn0265182	CG44247	CG44247	0.413121	0.0360597	0.211	0.184	1
FBgn0051774	CG31774	fred	0.41893	0.0650647	0.171	0.15	1
FBgn0000116	CG32031	Argk	0.424682	0.219075	0.871	0.868	1
FBgn0000273	CG4379	Pka-C1	0.425423	0.201336	0.592	0.543	1
FBgn0034731	CG10384	CG10384	0.43202	0.0121334	0.111	0.128	1
FBgn0030058	CG11294	CG11294	0.432193	0.0373213	0.297	0.287	1
FBgn0004242	CG3139	Syt1	0.439034	0.625528	0.897	0.907	1
FBgn0085432	CG34403	pan	0.439467	1.05356	0.793	0.662	1
FBgn0024963	CG7535	GluClalpha	0.452157	0.514565	0.804	0.734	1
FBgn0036494	CG7250	Toll-6	0.455804	0.0684854	0.239	0.212	1
FBgn0038826	CG17838	Syp	0.459254	0.217454	0.6	0.518	1
FBgn0264815	CG44007	Pde1c	0.459852	0.0916463	0.319	0.309	1
FBgn0264339	CG43795	CG43795	0.460844	-0.00400156	0.113	0.12	1
FBgn0037941	CG12594	CG12594	0.463292	-0.00362392	0.145	0.162	1
FBgn0027589	CG1688	CG1688	0.466895	0.00836212	0.216	0.222	1
FBgn0066084	CG30425	RpL41	0.468737	1.54565	0.88	0.574	1
FBgn0011661	CG10701	Moe	0.470784	0.0221127	0.153	0.154	1
FBgn0053179	CG33179	beat-IIIb	0.471136	-0.0152781	0.317	0.343	1
FBgn0263289	CG43398	scrib	0.471331	0.0448097	0.215	0.204	1
FBgn0261552	CG42670	ps	0.477335	0.137928	0.958	0.957	1
FBgn0267910	CR34335	lncRNA:CR34335	0.479181	6.48817	0.981	0.861	1
FBgn0022382	CG15862	Pka-R2	0.490315	0.155261	0.293	0.208	1
FBgn0260941	CG42318	app	0.491335	0.114501	0.268	0.23	1
FBgn0010411	CG8900	RpS18	0.499798	-0.618731	0.888	0.925	1
FBgn0013576	CG32464	mtd	0.511653	0.647346	0.793	0.738	1
FBgn0003165	CG9755	pum	0.514424	1.21703	0.816	0.654	1
FBgn0004880	CG1130	scrt	0.51825	0.240058	0.883	0.876	1
FBgn0267252	CG3694	Ggamma30A	0.525394	-0.295475	0.862	0.891	1
FBgn0034725	CG6044	CG6044	0.53172	-0.238746	0.511	0.566	1
FBgn0261113	CG17836	Xrp1	0.535525	0.0517137	0.167	0.138	1
FBgn0044328	CG32052	CG32052	0.537799	-0.00970501	0.19	0.197	1
FBgn0000636	CG5803	Fas3	0.541072	0.038605	0.179	0.179	1
FBgn0036043	CG8177	CG8177	0.549002	0.0679215	0.342	0.312	1
FBgn0053143	CG33143	CG33143	0.553434	-0.0198571	0.161	0.187	1
FBgn0264975	CG1634	Nrg	0.554313	0.0571496	0.165	0.133	1
FBgn0033484	CG2269	CG2269	0.557759	-0.201262	0.708	0.789	1
FBgn0267253	CG32700	CG32700	0.558442	0.0999069	0.356	0.313	1
FBgn0263994	CG43737	CG43737	0.562914	0.347665	0.479	0.371	1
FBgn0004580	CG6702	Cbp53E	0.563255	0.277838	0.396	0.274	1
FBgn0041707	CG1168	7B2	0.564818	-0.383186	0.77	0.85	1
FBgn0083950	CG34114	side-VI	0.56876	0.174841	0.389	0.346	1
FBgn0037525	CG17816	CG17816	0.569237	0.148837	0.53	0.479	1
FBgn0085421	CG34392	Epac	0.575945	0.0384407	0.163	0.134	1
FBgn0030505	CG11172	NFAT	0.579266	0.0978273	0.281	0.243	1
FBgn0036165	CG7533	chrb	0.602152	0.28377	0.555	0.463	1
FBgn0037015	CG13253	cmpy	0.60504	0.0329676	0.212	0.199	1
FBgn0266137	CG18741	Dop1R2	0.605058	0.029325	0.113	0.101	1
FBgn0261597	CG10305	RpS26	0.605547	-0.374751	0.856	0.907	1
FBgn0035032	CG4692	ATPsynF	0.609308	-0.748601	0.86	0.916	1
FBgn0033932	CG8422	Dh44-R1	0.611889	0.00244192	0.108	0.101	1
FBgn0039064	CG4467	CG4467	0.621234	0.308274	0.443	0.316	1
FBgn0264490	CG18389	Eip93F	0.635964	0.197788	0.359	0.307	1
FBgn0033192	CG2105	Corin	0.638094	0.00616914	0.393	0.397	1
FBgn0285948	CG15442	RpL27A	0.640361	0.0829438	0.797	0.82	1
FBgn0259108	CG34387	futsch	0.641404	0.270279	0.77	0.737	1
FBgn0261089	CG5559	Sytalpha	0.641418	0.0401392	0.111	0.092	1
FBgn0000633	CG17716	CG17716	0.646407	0.26321	0.452	0.407	1
FBgn0264006	CG43749	dysc	0.651353	0.276678	0.768	0.751	1
FBgn0010313	CG2530	corto	0.65611	0.0185667	0.39	0.393	1
FBgn0085434	CG34405	NaCP60E	0.664686	0.424577	0.758	0.703	1
FBgn0003380	CG12348	Sh	0.665423	1.05933	0.79	0.759	1
FBgn0035170	CG12191	dpr20	0.666173	0.0301802	0.139	0.124	1
FBgn0052062	CG32062	Rbfox1	0.670086	0.491126	0.788	0.696	1
FBgn0017590	CG6669	klg	0.68557	0.00988112	0.335	0.345	1
FBgn0043364	CG4427	cbt	0.696076	-0.00416582	0.108	0.114	1
FBgn0264503	CG43902	CG43902	0.699272	0.0231406	0.127	0.112	1
FBgn0033250	CG14762	CG14762	0.700823	0.0215082	0.169	0.15	1
FBgn0261871	CG33507	dpr2	0.71905	0.0303444	0.147	0.149	1
FBgn0014163	CG4609	fax	0.724199	0.403339	0.498	0.318	1
FBgn0085387	CG34358	shakB	0.724292	0.171193	0.42	0.4	1
FBgn0003499	CG7847	sr	0.731246	0.040488	0.175	0.154	1
FBgn0004244	CG10537	Rdl	0.736489	0.296791	0.897	0.909	1
FBgn0038653	CG18208	Octalpha2R	0.742338	0.120511	0.425	0.378	1
FBgn0014184	CG16747	Oda	0.749851	0.192486	0.696	0.611	1
FBgn0032833	CG10664	COX4	0.749901	-1.05904	0.82	0.916	1
FBgn0260657	CG42540	CG42540	0.750685	0.289106	0.55	0.489	1
FBgn0014859	CG1864	Hr38	0.757143	-0.201685	0.356	0.4	1
FBgn0083975	CG34139	Nlg4	0.758942	0.0533953	0.187	0.176	1
FBgn0033446	CG1648	CG1648	0.75955	0.0129394	0.109	0.103	1
FBgn0004514	CG7485	Oct-TyrR	0.774679	0.0198469	0.161	0.154	1
FBgn0261788	CG42734	Ank2	0.777172	0.514951	0.737	0.642	1
FBgn0261258	CG6014	rgn	0.781403	-0.0191001	0.116	0.132	1
FBgn0003360	CG16944	sesB	0.787034	-0.116006	0.858	0.887	1
FBgn0031294	CG31795	IA-2	0.789731	3.6767	0.942	0.926	1
FBgn0261999	CG42817	Ca-Ma2d	0.79185	0.016455	0.116	0.107	1
FBgn0000635	CG3665	Fas2	0.796171	0.0576136	0.26	0.234	1
FBgn0051665	CG31665	wry	0.79951	0.175618	0.349	0.305	1
FBgn0000575	CG1007	emc	0.804711	0.0955073	0.399	0.364	1
FBgn0001145	CG1743	Gs2	0.807672	0.0177911	0.112	0.116	1
FBgn0041094	CG7590	scyl	0.808425	0.0722262	0.347	0.339	1
FBgn0265597	CG44424	rad	0.812987	0.24016	0.408	0.372	1
FBgn0002593	CG4087	RpLP1	0.814453	-0.366397	0.788	0.855	1
FBgn0032840	CG13968	sNPF	0.831335	0.243589	0.256	0.251	1
FBgn0052647	CG32647	CG32647	0.8342	0.0480001	0.278	0.258	1
FBgn0010114	CG2040	hig	0.837962	0.113097	0.438	0.393	1
FBgn0261804	CG42750	CG42750	0.847286	0.0475699	0.485	0.497	1
FBgn0086778	CG32538	nAChRalpha7	0.848056	0.378001	0.687	0.641	1
FBgn0027654	CG2239	jdp	0.848884	0.0294893	0.488	0.48	1
FBgn0029761	CG10706	SK	0.85117	0.336065	0.557	0.437	1
FBgn0053543	CG33543	CG33543	0.857535	0.0423627	0.251	0.239	1
FBgn0261244	CG33174	inaE	0.859225	-0.00136321	0.372	0.367	1
FBgn0085412	CG34383	kmr	0.860992	0.0452245	0.292	0.275	1
FBgn0015399	CG12283	kek1	0.862389	0.118311	0.416	0.396	1
FBgn0085407	CG34378	Pvf3	0.866523	0.382251	0.546	0.458	1
FBgn0270928	CG32848	VAChT	0.872649	0.0377582	0.139	0.114	1
FBgn0010113	CG15532	hdc	0.875739	0.288163	0.378	0.286	1
FBgn0066101	CG31094	LpR1	0.880648	0.104274	0.309	0.297	1
FBgn0265002	CG44153	CG44153	0.880681	-0.00708189	0.206	0.211	1
FBgn0031835	CG11319	CG11319	0.884386	0.128382	0.306	0.268	1
FBgn0028644	CG4838	beat-Ic	0.885776	0.13292	0.335	0.309	1
FBgn0040765	CG33473	luna	0.886952	0.146564	0.372	0.353	1
FBgn0004611	CG4574	Plc21C	0.90006	0.0354789	0.359	0.349	1
FBgn0053202	CG33202	dpr11	0.910781	0.0692	0.353	0.334	1
FBgn0013467	CG18285	igl	0.915774	0.378983	0.521	0.424	1
FBgn0037874	CG4800	Tctp	0.921926	0.0322462	0.461	0.466	1
FBgn0013954	CG11001	Fkbp12	0.929012	-0.158313	0.472	0.536	1
FBgn0039816	CG11317	CG11317	0.930906	0.00326831	0.115	0.118	1
FBgn0030174	CG15312	CG15312	0.930936	0.00652476	0.13	0.138	1
FBgn0053126	CG33126	NLaz	0.931704	0.00671273	0.239	0.239	1
FBgn0285952	CG3186	eEF5	0.938481	0.00286866	0.268	0.27	1
FBgn0052183	CG32183	Ccn	0.9467	-0.00374246	0.126	0.13	1
FBgn0003435	CG9218	sm	0.948866	0.679149	0.847	0.804	1
FBgn0039054	CG13830	Cow	0.954168	0.153969	0.404	0.336	1
FBgn0031897	CG13784	CG13784	0.959629	0.00822665	0.215	0.212	1
FBgn0263512	CG33980	Vsx2	0.959776	-0.00863984	0.135	0.134	1
FBgn0034753	CG2852	CG2852	0.96555	-0.119012	0.466	0.479	1
FBgn0001149	CG10045	GstD1	0.970518	-0.0113781	0.113	0.113	1
FBgn0031414	CG33955	eys	0.970955	0.0521557	0.337	0.316	1
FBgn0265487	CG33197	mbl	0.971915	0.138503	0.409	0.397	1
FBgn0010263	CG3151	Rbp9	0.981228	0.22364	0.418	0.333	1
FBgn0001233	CG1242	Hsp83	0.98612	-0.0528348	0.663	0.664	1
FBgn0031258	CG4297	CG4297	0.990853	-0.00663314	0.152	0.155	1
FBgn0038839	CG10830	Ktl	0.991342	0.00743582	0.333	0.337	1
FBgn0038087	CG10134	beat-Va	0.994828	0.0222651	0.102	0.093	1
FBgn0000042	CG4027	Act5C	0.999765	0.0264513	0.561	0.583	1

[truncated: 27 more sheets: Female_C10, Female_C11, Female_C12, Female_C13, Female_C14, Female_C15, Female_C16, Female_C17, Female_C18, Female_C19, Female_C20, Female_C21, Female_C22, Female_C23, Female_C24, Female_C25, Female_C26, Female_C27, Female_C28, Female_C29 …]
