# Supplementary material for: The Drosophila brain on cocaine at single-cell resolution
Source: Genome Res. 2021 Oct;31(10):1927–37. doi: 10.1101/gr.268037.120 (PMC8494231; doi:10.1101/gr.268037.120)
Supplement: Supplemental Material [file supp_gr.268037.120_Supplemental_Table_S9_xlsx.xlsx]

## Sheet: C0
Female	Male	Unique	Present
FBgn0019660	FBgn0019660	FBgn0019660	BOTH
FBgn0013688	FBgn0004047	FBgn0013688	FEMALE
FBgn0085753	FBgn0087002	FBgn0085753	FEMALE
FBgn0033987	FBgn0058469	FBgn0033987	FEMALE
FBgn0283651	FBgn0267519	FBgn0283651	BOTH
FBgn0052057	FBgn0050115	FBgn0052057	BOTH
FBgn0058469	FBgn0285926	FBgn0058469	BOTH
FBgn0264794	FBgn0260429	FBgn0264794	FEMALE
FBgn0052982	FBgn0052626	FBgn0052982	BOTH
FBgn0004573	FBgn0052057	FBgn0004573	BOTH
FBgn0267910	FBgn0051690	FBgn0267910	FEMALE
FBgn0002940	FBgn0052066	FBgn0002940	BOTH
FBgn0267322	FBgn0267431	FBgn0267322	BOTH
FBgn0003301	FBgn0037963	FBgn0003301	BOTH
FBgn0052683	FBgn0052982	FBgn0052683	BOTH
FBgn0014859	FBgn0036821	FBgn0014859	FEMALE
FBgn0065099	FBgn0036789	FBgn0065099	FEMALE
FBgn0031299	FBgn0083228	FBgn0031299	BOTH
FBgn0029768	FBgn0029768	FBgn0029768	BOTH
FBgn0038246	FBgn0013995	FBgn0038246	FEMALE
FBgn0262473	FBgn0250867	FBgn0262473	BOTH
FBgn0013995	FBgn0264090	FBgn0013995	BOTH
FBgn0264753	FBgn0020621	FBgn0264753	BOTH
FBgn0085399	FBgn0283499	FBgn0085399	FEMALE
FBgn0020621	FBgn0015766	FBgn0020621	BOTH
FBgn0031294	FBgn0002945	FBgn0031294	FEMALE
FBgn0004619	FBgn0087012	FBgn0004619	BOTH
FBgn0265052	FBgn0259677	FBgn0265052	FEMALE
FBgn0036789	FBgn0052683	FBgn0036789	BOTH
FBgn0259677	FBgn0086604	FBgn0259677	BOTH
FBgn0004395	FBgn0004573	FBgn0004395	BOTH
FBgn0261090	FBgn0031299	FBgn0261090	BOTH
FBgn0259170	FBgn0002543	FBgn0259170	FEMALE
FBgn0033356	FBgn0085397	FBgn0033356	FEMALE
FBgn0052521	FBgn0004619	FBgn0052521	BOTH
FBgn0087012	FBgn0003301	FBgn0087012	BOTH
FBgn0053087	FBgn0003499	FBgn0053087	BOTH
FBgn0040877	FBgn0001226	FBgn0040877	BOTH
FBgn0050361	FBgn0261260	FBgn0050361	FEMALE
FBgn0050115	FBgn0019662	FBgn0050115	BOTH
FBgn0250910	FBgn0264753	FBgn0250910	FEMALE
FBgn0001226	FBgn0036801	FBgn0001226	BOTH
FBgn0023095	FBgn0050463	FBgn0023095	FEMALE
FBgn0001234	FBgn0001224	FBgn0001234	BOTH
FBgn0261260	FBgn0040153	FBgn0261260	BOTH
FBgn0266377	FBgn0005677	FBgn0266377	FEMALE
FBgn0024189	FBgn0267322	FBgn0024189	FEMALE
FBgn0027356	FBgn0052698	FBgn0027356	FEMALE
FBgn0037963	FBgn0002940	FBgn0037963	BOTH
FBgn0002543	FBgn0029824	FBgn0002543	BOTH
FBgn0002643	FBgn0031738	FBgn0002643	FEMALE
FBgn0261649	FBgn0263773	FBgn0261649	BOTH
FBgn0260971	FBgn0040532	FBgn0260971	BOTH
FBgn0051690	FBgn0052521	FBgn0051690	BOTH
FBgn0029663	FBgn0030158	FBgn0029663	BOTH
FBgn0260442	FBgn0051814	FBgn0260442	FEMALE
FBgn0265194	FBgn0263772	FBgn0265194	FEMALE
FBgn0263257	FBgn0283651	FBgn0263257	FEMALE
FBgn0267431	FBgn0000636	FBgn0267431	BOTH
FBgn0264090	FBgn0260971	FBgn0264090	BOTH
FBgn0035816	FBgn0285963	FBgn0035816	FEMALE
FBgn0031736	FBgn0262473	FBgn0031736	FEMALE
FBgn0028888	FBgn0261509	FBgn0028888	FEMALE
FBgn0000547	FBgn0031971	FBgn0000547	BOTH
FBgn0001085	FBgn0025525	FBgn0001085	FEMALE
FBgn0083228	FBgn0000179	FBgn0083228	BOTH
FBgn0052066	FBgn0051361	FBgn0052066	BOTH
FBgn0263873	FBgn0001234	FBgn0263873	FEMALE
FBgn0262018	FBgn0264975	FBgn0262018	FEMALE
FBgn0004102	FBgn0029939	FBgn0004102	FEMALE
FBgn0033368	FBgn0004395	FBgn0033368	FEMALE
FBgn0033159	FBgn0004607	FBgn0033159	BOTH
FBgn0261046	FBgn0261999	FBgn0261046	FEMALE
FBgn0051092	FBgn0029663	FBgn0051092	BOTH
FBgn0001225	FBgn0004168	FBgn0001225	BOTH
FBgn0027654	FBgn0267253	FBgn0027654	FEMALE
FBgn0025382	FBgn0261649	FBgn0025382	FEMALE
FBgn0000064	FBgn0045038	FBgn0000064	FEMALE
FBgn0266429	FBgn0004595	FBgn0266429	FEMALE
FBgn0260003	FBgn0012344	FBgn0260003	FEMALE
FBgn0085426	FBgn0262614	FBgn0085426	BOTH
FBgn0042696	FBgn0051324	FBgn0042696	FEMALE
FBgn0085397	FBgn0243512	FBgn0085397	BOTH
FBgn0085420	FBgn0052183	FBgn0085420	BOTH
FBgn0004882	FBgn0085426	FBgn0004882	FEMALE
FBgn0031738	FBgn0051475	FBgn0031738	BOTH
FBgn0250867	FBgn0033405	FBgn0250867	BOTH
FBgn0015774	FBgn0034897	FBgn0015774	FEMALE
FBgn0032901	FBgn0024321	FBgn0032901	FEMALE
	FBgn0000547	FBgn0004047	MALE
	FBgn0037015	FBgn0087002	MALE
	FBgn0051092	FBgn0267519	MALE
	FBgn0261090	FBgn0285926	MALE
	FBgn0000097	FBgn0260429	MALE
	FBgn0001225	FBgn0052626	MALE
	FBgn0261113	FBgn0036821	MALE
	FBgn0035495	FBgn0283499	MALE
	FBgn0259216	FBgn0015766	MALE
	FBgn0050419	FBgn0002945	MALE
	FBgn0263219	FBgn0086604	MALE
	FBgn0004652	FBgn0003499	MALE
	FBgn0085370	FBgn0019662	MALE
	FBgn0040877	FBgn0036801	MALE
	FBgn0283451	FBgn0050463	MALE
	FBgn0031530	FBgn0001224	MALE
	FBgn0085385	FBgn0040153	MALE
	FBgn0261698	FBgn0005677	MALE
	FBgn0032666	FBgn0052698	MALE
	FBgn0033159	FBgn0029824	MALE
	FBgn0085382	FBgn0263773	MALE
	FBgn0004885	FBgn0040532	MALE
	FBgn0267033	FBgn0030158	MALE
	FBgn0031306	FBgn0051814	MALE
	FBgn0040823	FBgn0263772	MALE
	FBgn0263706	FBgn0000636	MALE
	FBgn0034408	FBgn0285963	MALE
	FBgn0259243	FBgn0261509	MALE
	FBgn0031016	FBgn0031971	MALE
	FBgn0030272	FBgn0025525	MALE
	FBgn0027589	FBgn0000179	MALE
	FBgn0264273	FBgn0051361	MALE
	FBgn0004580	FBgn0264975	MALE
	FBgn0053087	FBgn0029939	MALE
	FBgn0015519	FBgn0004607	MALE
	FBgn0030505	FBgn0261999	MALE
	FBgn0053517	FBgn0004168	MALE
	FBgn0000121	FBgn0267253	MALE
	FBgn0052600	FBgn0045038	MALE
	FBgn0085420	FBgn0004595	MALE
	FBgn0020269	FBgn0012344	MALE
	FBgn0013733	FBgn0262614	MALE
	FBgn0001229	FBgn0051324	MALE
	FBgn0033268	FBgn0243512	MALE
	FBgn0260658	FBgn0052183	MALE
		FBgn0051475	MALE
		FBgn0033405	MALE
		FBgn0034897	MALE
		FBgn0024321	MALE
		FBgn0037015	MALE
		FBgn0000097	MALE
		FBgn0261113	MALE
		FBgn0035495	MALE
		FBgn0259216	MALE
		FBgn0050419	MALE
		FBgn0263219	MALE
		FBgn0004652	MALE
		FBgn0085370	MALE
		FBgn0283451	MALE
		FBgn0031530	MALE
		FBgn0085385	MALE
		FBgn0261698	MALE
		FBgn0032666	MALE
		FBgn0085382	MALE
		FBgn0004885	MALE
		FBgn0267033	MALE
		FBgn0031306	MALE
		FBgn0040823	MALE
		FBgn0263706	MALE
		FBgn0034408	MALE
		FBgn0259243	MALE
		FBgn0031016	MALE
		FBgn0030272	MALE
		FBgn0027589	MALE
		FBgn0264273	MALE
		FBgn0004580	MALE
		FBgn0015519	MALE
		FBgn0030505	MALE
		FBgn0053517	MALE
		FBgn0000121	MALE
		FBgn0052600	MALE
		FBgn0020269	MALE
		FBgn0013733	MALE
		FBgn0001229	MALE
		FBgn0033268	MALE
		FBgn0260658	MALE

## Sheet: C1
Female	Male	Unique	Present
FBgn0019660	FBgn0019660	FBgn0019660	BOTH
FBgn0013688	FBgn0004047	FBgn0004047	MALE
FBgn0085753	FBgn0035495	FBgn0035495	BOTH
FBgn0050361	FBgn0267519	FBgn0267519	MALE
FBgn0000121	FBgn0087002	FBgn0087002	BOTH
FBgn0004516	FBgn0058469	FBgn0058469	BOTH
FBgn0264753	FBgn0260429	FBgn0260429	BOTH
FBgn0058469	FBgn0050115	FBgn0050115	BOTH
FBgn0052683	FBgn0267431	FBgn0267431	BOTH
FBgn0036789	FBgn0250867	FBgn0250867	MALE
FBgn0267431	FBgn0030258	FBgn0030258	MALE
FBgn0087012	FBgn0285926	FBgn0285926	MALE
FBgn0004652	FBgn0083228	FBgn0083228	MALE
FBgn0052982	FBgn0036821	FBgn0036821	BOTH
FBgn0002940	FBgn0002543	FBgn0002543	BOTH
FBgn0003301	FBgn0029768	FBgn0029768	BOTH
FBgn0029768	FBgn0037963	FBgn0037963	BOTH
FBgn0267322	FBgn0004595	FBgn0004595	BOTH
FBgn0014859	FBgn0263049	FBgn0263049	MALE
FBgn0033987	FBgn0052982	FBgn0052982	BOTH
FBgn0052521	FBgn0052057	FBgn0052057	BOTH
FBgn0085426	FBgn0051324	FBgn0051324	MALE
FBgn0031294	FBgn0001235	FBgn0001235	MALE
FBgn0261260	FBgn0001226	FBgn0001226	BOTH
FBgn0033368	FBgn0030158	FBgn0030158	MALE
FBgn0004573	FBgn0031299	FBgn0031299	BOTH
FBgn0037963	FBgn0001224	FBgn0001224	MALE
FBgn0052057	FBgn0002945	FBgn0002945	MALE
FBgn0001226	FBgn0004607	FBgn0004607	MALE
FBgn0013995	FBgn0020621	FBgn0020621	MALE
FBgn0036821	FBgn0264090	FBgn0264090	MALE
FBgn0261649	FBgn0019662	FBgn0019662	MALE
FBgn0283651	FBgn0086680	FBgn0086680	MALE
FBgn0087002	FBgn0004652	FBgn0004652	BOTH
FBgn0002543	FBgn0038542	FBgn0038542	MALE
FBgn0259677	FBgn0002940	FBgn0002940	BOTH
FBgn0004619	FBgn0029663	FBgn0029663	BOTH
FBgn0051690	FBgn0014343	FBgn0014343	MALE
FBgn0039349	FBgn0004516	FBgn0004516	BOTH
FBgn0042696	FBgn0051690	FBgn0051690	BOTH
FBgn0065099	FBgn0052683	FBgn0052683	BOTH
FBgn0283499	FBgn0052626	FBgn0052626	MALE
FBgn0035495	FBgn0003499	FBgn0003499	MALE
FBgn0053087	FBgn0052698	FBgn0052698	MALE
FBgn0267910	FBgn0015766	FBgn0015766	MALE
FBgn0000064	FBgn0040532	FBgn0040532	MALE
FBgn0040877	FBgn0033356	FBgn0033356	BOTH
FBgn0265052	FBgn0031738	FBgn0031738	MALE
FBgn0051092	FBgn0029939	FBgn0029939	MALE
FBgn0031299	FBgn0259677	FBgn0259677	BOTH
FBgn0260971	FBgn0264753	FBgn0264753	BOTH
FBgn0260442	FBgn0053517	FBgn0053517	MALE
FBgn0264794	FBgn0004619	FBgn0004619	BOTH
FBgn0033356	FBgn0263772	FBgn0263772	MALE
FBgn0262473	FBgn0031530	FBgn0031530	MALE
FBgn0267252	FBgn0285963	FBgn0285963	MALE
FBgn0051163	FBgn0030272	FBgn0030272	MALE
FBgn0026411	FBgn0086359	FBgn0086359	MALE
FBgn0031698	FBgn0036789	FBgn0036789	BOTH
FBgn0051814	FBgn0086604	FBgn0086604	MALE
FBgn0029663	FBgn0051481	FBgn0051481	MALE
FBgn0266377	FBgn0262473	FBgn0262473	BOTH
FBgn0050463	FBgn0032666	FBgn0032666	MALE
FBgn0260003	FBgn0087012	FBgn0087012	BOTH
FBgn0041097	FBgn0085426	FBgn0085426	BOTH
FBgn0267001	FBgn0032048	FBgn0032048	MALE
FBgn0024189	FBgn0030913	FBgn0030913	MALE
FBgn0050115	FBgn0036801	FBgn0036801	MALE
FBgn0004395	FBgn0001234	FBgn0001234	MALE
FBgn0260657	FBgn0000287	FBgn0000287	MALE
FBgn0283451	FBgn0032629	FBgn0032629	MALE
FBgn0025525	FBgn0033268	FBgn0033268	MALE
FBgn0262018	FBgn0262614	FBgn0262614	MALE
FBgn0004595	FBgn0004573	FBgn0004573	BOTH
FBgn0033159	FBgn0261509	FBgn0261509	MALE
FBgn0027356	FBgn0036725	FBgn0036725	MALE
FBgn0263873	FBgn0033368	FBgn0033368	BOTH
FBgn0085399	FBgn0052521	FBgn0052521	BOTH
FBgn0261552	FBgn0085397	FBgn0085397	MALE
FBgn0261285	FBgn0052066	FBgn0052066	MALE
FBgn0034138	FBgn0031294	FBgn0031294	BOTH
FBgn0025382	FBgn0260971	FBgn0260971	BOTH
FBgn0260429	FBgn0013686	FBgn0013686	MALE
FBgn0261090	FBgn0014859	FBgn0014859	BOTH
FBgn0036454	FBgn0033405	FBgn0033405	MALE
FBgn0004910	FBgn0038980	FBgn0038980	MALE
	FBgn0001186	FBgn0001186	MALE
	FBgn0040877	FBgn0040877	BOTH
	FBgn0024321	FBgn0024321	MALE
	FBgn0004395	FBgn0004395	BOTH
	FBgn0261260	FBgn0261260	BOTH
	FBgn0283651	FBgn0283651	BOTH
	FBgn0025525	FBgn0025525	BOTH
	FBgn0264442	FBgn0264442	MALE
	FBgn0261698	FBgn0261698	MALE
	FBgn0031971	FBgn0031971	MALE
	FBgn0051361	FBgn0051361	MALE
	FBgn0034286	FBgn0034286	MALE
	FBgn0040823	FBgn0040823	MALE
	FBgn0263994	FBgn0263994	MALE
	FBgn0261090	FBgn0261090	BOTH
	FBgn0259245	FBgn0259245	MALE
	FBgn0020269	FBgn0020269	MALE
	FBgn0000042	FBgn0000042	MALE
	FBgn0053696	FBgn0053696	MALE
	FBgn0037676	FBgn0037676	MALE
	FBgn0000097	FBgn0000097	MALE
	FBgn0045038	FBgn0045038	MALE
	FBgn0262636	FBgn0262636	MALE
	FBgn0283499	FBgn0283499	BOTH
	FBgn0013995	FBgn0013995	BOTH
	FBgn0051475	FBgn0051475	MALE
	FBgn0037475	FBgn0037475	MALE
	FBgn0005636	FBgn0005636	MALE
	FBgn0000459	FBgn0000459	MALE
	FBgn0003301	FBgn0003301	BOTH
	FBgn0013718	FBgn0013718	MALE
	FBgn0051646	FBgn0051646	MALE
	FBgn0264895	FBgn0264895	MALE
	FBgn0261999	FBgn0261999	MALE
	FBgn0263773	FBgn0263773	MALE
	FBgn0050361	FBgn0050361	BOTH
		FBgn0013688	FEMALE
		FBgn0085753	FEMALE
		FBgn0000121	FEMALE
		FBgn0267322	FEMALE
		FBgn0033987	FEMALE
		FBgn0261649	FEMALE
		FBgn0039349	FEMALE
		FBgn0042696	FEMALE
		FBgn0065099	FEMALE
		FBgn0053087	FEMALE
		FBgn0267910	FEMALE
		FBgn0000064	FEMALE
		FBgn0265052	FEMALE
		FBgn0051092	FEMALE
		FBgn0260442	FEMALE
		FBgn0264794	FEMALE
		FBgn0267252	FEMALE
		FBgn0051163	FEMALE
		FBgn0026411	FEMALE
		FBgn0031698	FEMALE
		FBgn0051814	FEMALE
		FBgn0266377	FEMALE
		FBgn0050463	FEMALE
		FBgn0260003	FEMALE
		FBgn0041097	FEMALE
		FBgn0267001	FEMALE
		FBgn0024189	FEMALE
		FBgn0260657	FEMALE
		FBgn0283451	FEMALE
		FBgn0262018	FEMALE
		FBgn0033159	FEMALE
		FBgn0027356	FEMALE
		FBgn0263873	FEMALE
		FBgn0085399	FEMALE
		FBgn0261552	FEMALE
		FBgn0261285	FEMALE
		FBgn0034138	FEMALE
		FBgn0025382	FEMALE
		FBgn0036454	FEMALE
		FBgn0004910	FEMALE

## Sheet: C2
Female	Male	Unique	Present
FBgn0019660	FBgn0019660	FBgn0019660	BOTH
FBgn0085753	FBgn0004047	FBgn0004047	MALE
FBgn0033987	FBgn0058469	FBgn0058469	BOTH
FBgn0038641	FBgn0087002	FBgn0087002	MALE
FBgn0052683	FBgn0260429	FBgn0260429	MALE
FBgn0038246	FBgn0267519	FBgn0267519	MALE
FBgn0052057	FBgn0050115	FBgn0050115	BOTH
FBgn0004573	FBgn0285926	FBgn0285926	MALE
FBgn0013995	FBgn0250867	FBgn0250867	MALE
FBgn0029768	FBgn0002543	FBgn0002543	BOTH
FBgn0052982	FBgn0267431	FBgn0267431	BOTH
FBgn0058469	FBgn0052066	FBgn0052066	MALE
FBgn0023095	FBgn0037963	FBgn0037963	BOTH
FBgn0266377	FBgn0019662	FBgn0019662	BOTH
FBgn0283651	FBgn0029768	FBgn0029768	BOTH
FBgn0259170	FBgn0001090	FBgn0001090	MALE
FBgn0261649	FBgn0260971	FBgn0260971	BOTH
FBgn0265052	FBgn0264090	FBgn0264090	BOTH
FBgn0027356	FBgn0036821	FBgn0036821	MALE
FBgn0002940	FBgn0052626	FBgn0052626	MALE
FBgn0052521	FBgn0083228	FBgn0083228	MALE
FBgn0085385	FBgn0011693	FBgn0011693	MALE
FBgn0261260	FBgn0052982	FBgn0052982	BOTH
FBgn0267322	FBgn0259677	FBgn0259677	BOTH
FBgn0003301	FBgn0052683	FBgn0052683	BOTH
FBgn0001234	FBgn0031299	FBgn0031299	BOTH
FBgn0262473	FBgn0263049	FBgn0263049	MALE
FBgn0050361	FBgn0051690	FBgn0051690	BOTH
FBgn0040877	FBgn0033159	FBgn0033159	BOTH
FBgn0041097	FBgn0052057	FBgn0052057	BOTH
FBgn0019662	FBgn0285963	FBgn0285963	MALE
FBgn0259234	FBgn0020621	FBgn0020621	BOTH
FBgn0024944	FBgn0029939	FBgn0029939	MALE
FBgn0013718	FBgn0002945	FBgn0002945	MALE
FBgn0050115	FBgn0261260	FBgn0261260	BOTH
FBgn0004619	FBgn0015766	FBgn0015766	MALE
FBgn0087012	FBgn0033987	FBgn0033987	BOTH
FBgn0034398	FBgn0035050	FBgn0035050	MALE
FBgn0264753	FBgn0087012	FBgn0087012	BOTH
FBgn0264308	FBgn0283499	FBgn0283499	MALE
FBgn0259212	FBgn0004607	FBgn0004607	BOTH
FBgn0042696	FBgn0004619	FBgn0004619	BOTH
FBgn0260971	FBgn0040153	FBgn0040153	MALE
FBgn0028888	FBgn0024150	FBgn0024150	MALE
FBgn0004395	FBgn0031738	FBgn0031738	BOTH
FBgn0267579	FBgn0013718	FBgn0013718	BOTH
FBgn0033356	FBgn0000547	FBgn0000547	BOTH
FBgn0002543	FBgn0086604	FBgn0086604	MALE
FBgn0259677	FBgn0036789	FBgn0036789	BOTH
FBgn0265416	FBgn0036801	FBgn0036801	MALE
FBgn0267431	FBgn0267322	FBgn0267322	BOTH
FBgn0260003	FBgn0030158	FBgn0030158	MALE
FBgn0004882	FBgn0011818	FBgn0011818	MALE
FBgn0040765	FBgn0004573	FBgn0004573	BOTH
FBgn0264794	FBgn0001234	FBgn0001234	BOTH
FBgn0085426	FBgn0028370	FBgn0028370	MALE
FBgn0033368	FBgn0051361	FBgn0051361	MALE
FBgn0267910	FBgn0066101	FBgn0066101	MALE
FBgn0036789	FBgn0040532	FBgn0040532	MALE
FBgn0001226	FBgn0001224	FBgn0001224	MALE
FBgn0020621	FBgn0004882	FBgn0004882	BOTH
FBgn0000547	FBgn0029824	FBgn0029824	MALE
FBgn0260442	FBgn0033405	FBgn0033405	MALE
FBgn0001225	FBgn0004652	FBgn0004652	MALE
FBgn0004595	FBgn0031530	FBgn0031530	MALE
FBgn0264090	FBgn0001226	FBgn0001226	BOTH
FBgn0051324	FBgn0024321	FBgn0024321	MALE
FBgn0261285	FBgn0267033	FBgn0267033	MALE
FBgn0261090	FBgn0053639	FBgn0053639	BOTH
FBgn0026411	FBgn0283651	FBgn0283651	BOTH
FBgn0085399	FBgn0262473	FBgn0262473	BOTH
FBgn0033159	FBgn0259216	FBgn0259216	MALE
FBgn0010300	FBgn0085397	FBgn0085397	MALE
FBgn0031299	FBgn0262614	FBgn0262614	MALE
FBgn0025382	FBgn0052521	FBgn0052521	BOTH
FBgn0259111	FBgn0262636	FBgn0262636	MALE
FBgn0033403	FBgn0263772	FBgn0263772	MALE
FBgn0031738	FBgn0003499	FBgn0003499	MALE
FBgn0037963	FBgn0264753	FBgn0264753	BOTH
FBgn0053639	FBgn0051324	FBgn0051324	BOTH
FBgn0051814	FBgn0263773	FBgn0263773	MALE
FBgn0037956	FBgn0085426	FBgn0085426	BOTH
FBgn0031736	FBgn0051475	FBgn0051475	MALE
FBgn0051163	FBgn0030913	FBgn0030913	MALE
FBgn0004449	FBgn0003301	FBgn0003301	BOTH
FBgn0050463	FBgn0263706	FBgn0263706	BOTH
FBgn0040805	FBgn0013995	FBgn0013995	BOTH
FBgn0085395	FBgn0030272	FBgn0030272	MALE
FBgn0051760	FBgn0051191	FBgn0051191	BOTH
FBgn0260941	FBgn0038542	FBgn0038542	MALE
FBgn0051191	FBgn0040877	FBgn0040877	BOTH
FBgn0051690	FBgn0004395	FBgn0004395	BOTH
FBgn0004607	FBgn0001229	FBgn0001229	MALE
FBgn0034897	FBgn0264273	FBgn0264273	MALE
FBgn0011224	FBgn0040823	FBgn0040823	MALE
FBgn0261549	FBgn0050419	FBgn0050419	MALE
FBgn0265194	FBgn0001078	FBgn0001078	MALE
FBgn0035173	FBgn0000097	FBgn0000097	MALE
FBgn0263706	FBgn0051774	FBgn0051774	MALE
FBgn0085390	FBgn0050463	FBgn0050463	BOTH
FBgn0039209	FBgn0025525	FBgn0025525	MALE
	FBgn0263219	FBgn0263219	MALE
	FBgn0052698	FBgn0052698	MALE
	FBgn0037913	FBgn0037913	MALE
	FBgn0037521	FBgn0037521	MALE
	FBgn0261090	FBgn0261090	BOTH
	FBgn0019985	FBgn0019985	MALE
	FBgn0036725	FBgn0036725	MALE
	FBgn0033446	FBgn0033446	MALE
	FBgn0038980	FBgn0038980	MALE
	FBgn0051814	FBgn0051814	BOTH
	FBgn0002940	FBgn0002940	BOTH
	FBgn0031971	FBgn0031971	MALE
	FBgn0013733	FBgn0013733	MALE
	FBgn0085385	FBgn0085385	BOTH
	FBgn0015519	FBgn0015519	MALE
	FBgn0085412	FBgn0085412	MALE
	FBgn0038641	FBgn0038641	BOTH
	FBgn0053517	FBgn0053517	MALE
	FBgn0085409	FBgn0085409	MALE
	FBgn0037475	FBgn0037475	MALE
	FBgn0000567	FBgn0000567	MALE
	FBgn0035495	FBgn0035495	MALE
	FBgn0020269	FBgn0020269	MALE
	FBgn0086680	FBgn0086680	MALE
	FBgn0260658	FBgn0260658	MALE
	FBgn0015777	FBgn0015777	MALE
	FBgn0037015	FBgn0037015	MALE
	FBgn0283451	FBgn0283451	MALE
	FBgn0264442	FBgn0264442	MALE
	FBgn0010452	FBgn0010452	MALE
	FBgn0053087	FBgn0053087	MALE
	FBgn0250869	FBgn0250869	MALE
	FBgn0261698	FBgn0261698	MALE
	FBgn0243512	FBgn0243512	MALE
	FBgn0085399	FBgn0085399	BOTH
	FBgn0032666	FBgn0032666	MALE
	FBgn0028888	FBgn0028888	BOTH
	FBgn0051092	FBgn0051092	MALE
	FBgn0266429	FBgn0266429	MALE
	FBgn0034897	FBgn0034897	BOTH
	FBgn0000659	FBgn0000659	MALE
	FBgn0000287	FBgn0000287	MALE
	FBgn0000636	FBgn0000636	MALE
	FBgn0260941	FBgn0260941	BOTH
	FBgn0053696	FBgn0053696	MALE
	FBgn0264339	FBgn0264339	MALE
	FBgn0027608	FBgn0027608	MALE
	FBgn0024841	FBgn0024841	MALE
	FBgn0028369	FBgn0028369	MALE
	FBgn0001225	FBgn0001225	BOTH
	FBgn0085420	FBgn0085420	MALE
	FBgn0000037	FBgn0000037	MALE
	FBgn0040397	FBgn0040397	MALE
	FBgn0085370	FBgn0085370	MALE
	FBgn0030505	FBgn0030505	MALE
	FBgn0051760	FBgn0051760	BOTH
	FBgn0262782	FBgn0262782	MALE
	FBgn0015774	FBgn0015774	MALE
	FBgn0033438	FBgn0033438	MALE
	FBgn0050361	FBgn0050361	BOTH
	FBgn0261258	FBgn0261258	MALE
	FBgn0261588	FBgn0261588	MALE
	FBgn0000116	FBgn0000116	MALE
	FBgn0085382	FBgn0085382	MALE
	FBgn0085390	FBgn0085390	BOTH
	FBgn0085407	FBgn0085407	MALE
	FBgn0263131	FBgn0263131	MALE
	FBgn0264308	FBgn0264308	BOTH
	FBgn0033268	FBgn0033268	MALE
	FBgn0267253	FBgn0267253	MALE
	FBgn0000042	FBgn0000042	MALE
	FBgn0259243	FBgn0259243	MALE
	FBgn0027589	FBgn0027589	MALE
	FBgn0261871	FBgn0261871	MALE
	FBgn0031897	FBgn0031897	MALE
	FBgn0261999	FBgn0261999	MALE
	FBgn0051708	FBgn0051708	MALE
		FBgn0085753	FEMALE
		FBgn0038246	FEMALE
		FBgn0023095	FEMALE
		FBgn0266377	FEMALE
		FBgn0259170	FEMALE
		FBgn0261649	FEMALE
		FBgn0265052	FEMALE
		FBgn0027356	FEMALE
		FBgn0041097	FEMALE
		FBgn0259234	FEMALE
		FBgn0024944	FEMALE
		FBgn0034398	FEMALE
		FBgn0259212	FEMALE
		FBgn0042696	FEMALE
		FBgn0267579	FEMALE
		FBgn0033356	FEMALE
		FBgn0265416	FEMALE
		FBgn0260003	FEMALE
		FBgn0040765	FEMALE
		FBgn0264794	FEMALE
		FBgn0033368	FEMALE
		FBgn0267910	FEMALE
		FBgn0260442	FEMALE
		FBgn0004595	FEMALE
		FBgn0261285	FEMALE
		FBgn0026411	FEMALE
		FBgn0010300	FEMALE
		FBgn0025382	FEMALE
		FBgn0259111	FEMALE
		FBgn0033403	FEMALE
		FBgn0037956	FEMALE
		FBgn0031736	FEMALE
		FBgn0051163	FEMALE
		FBgn0004449	FEMALE
		FBgn0040805	FEMALE
		FBgn0085395	FEMALE
		FBgn0011224	FEMALE
		FBgn0261549	FEMALE
		FBgn0265194	FEMALE
		FBgn0035173	FEMALE
		FBgn0039209	FEMALE

## Sheet: C3
Female	Male	Unique	Present
FBgn0019660	FBgn0019660	FBgn0019660	BOTH
FBgn0013688	FBgn0004047	FBgn0013688	FEMALE
FBgn0085753	FBgn0051690	FBgn0085753	FEMALE
FBgn0004652	FBgn0058469	FBgn0004652	BOTH
FBgn0003301	FBgn0004652	FBgn0003301	BOTH
FBgn0002868	FBgn0002940	FBgn0002868	FEMALE
FBgn0002940	FBgn0260429	FBgn0002940	BOTH
FBgn0013995	FBgn0002945	FBgn0013995	BOTH
FBgn0058469	FBgn0036821	FBgn0058469	BOTH
FBgn0065099	FBgn0052057	FBgn0065099	BOTH
FBgn0042696	FBgn0011693	FBgn0042696	BOTH
FBgn0259170	FBgn0052982	FBgn0259170	BOTH
FBgn0033403	FBgn0037015	FBgn0033403	BOTH
FBgn0004619	FBgn0283499	FBgn0004619	BOTH
FBgn0038665	FBgn0024321	FBgn0038665	FEMALE
FBgn0087012	FBgn0004619	FBgn0087012	BOTH
FBgn0052057	FBgn0087002	FBgn0052057	BOTH
FBgn0264753	FBgn0029768	FBgn0264753	BOTH
FBgn0004910	FBgn0285926	FBgn0004910	FEMALE
FBgn0001186	FBgn0036789	FBgn0001186	FEMALE
FBgn0051324	FBgn0267322	FBgn0051324	BOTH
FBgn0029768	FBgn0052066	FBgn0029768	BOTH
FBgn0031424	FBgn0083228	FBgn0031424	FEMALE
FBgn0029824	FBgn0013995	FBgn0029824	BOTH
FBgn0264308	FBgn0285963	FBgn0264308	FEMALE
FBgn0036789	FBgn0020269	FBgn0036789	BOTH
FBgn0033356	FBgn0263773	FBgn0033356	FEMALE
FBgn0260971	FBgn0087012	FBgn0260971	BOTH
FBgn0011666	FBgn0052683	FBgn0011666	BOTH
FBgn0039209	FBgn0031299	FBgn0039209	BOTH
FBgn0262473	FBgn0264753	FBgn0262473	BOTH
FBgn0260442	FBgn0052626	FBgn0260442	BOTH
FBgn0033987	FBgn0267910	FBgn0033987	BOTH
FBgn0267910	FBgn0010452	FBgn0267910	BOTH
FBgn0038246	FBgn0086604	FBgn0038246	FEMALE
FBgn0004395	FBgn0032666	FBgn0004395	BOTH
FBgn0085447	FBgn0261588	FBgn0085447	BOTH
FBgn0029663	FBgn0000659	FBgn0029663	BOTH
FBgn0029939	FBgn0259677	FBgn0029939	FEMALE
FBgn0260753	FBgn0261509	FBgn0260753	BOTH
FBgn0261988	FBgn0261698	FBgn0261988	BOTH
FBgn0000064	FBgn0250867	FBgn0000064	FEMALE
FBgn0265052	FBgn0000547	FBgn0265052	FEMALE
FBgn0261649	FBgn0031738	FBgn0261649	BOTH
FBgn0001091	FBgn0051324	FBgn0001091	FEMALE
FBgn0023095	FBgn0264090	FBgn0023095	FEMALE
FBgn0035816	FBgn0045038	FBgn0035816	FEMALE
FBgn0027356	FBgn0262782	FBgn0027356	FEMALE
FBgn0010300	FBgn0261260	FBgn0010300	FEMALE
FBgn0013686	FBgn0260971	FBgn0013686	FEMALE
FBgn0261262	FBgn0261988	FBgn0261262	FEMALE
FBgn0261260	FBgn0003301	FBgn0261260	BOTH
FBgn0052982	FBgn0036801	FBgn0052982	BOTH
FBgn0264000	FBgn0029663	FBgn0264000	BOTH
FBgn0001085	FBgn0019662	FBgn0001085	BOTH
FBgn0283499	FBgn0019650	FBgn0283499	BOTH
FBgn0015519	FBgn0000097	FBgn0015519	BOTH
FBgn0052521	FBgn0029824	FBgn0052521	BOTH
FBgn0267322	FBgn0051814	FBgn0267322	BOTH
FBgn0263994	FBgn0003499	FBgn0263994	BOTH
FBgn0051690	FBgn0000179	FBgn0051690	BOTH
FBgn0036454	FBgn0004395	FBgn0036454	FEMALE
FBgn0015777	FBgn0051163	FBgn0015777	BOTH
FBgn0000547	FBgn0033987	FBgn0000547	BOTH
FBgn0262782	FBgn0031530	FBgn0262782	BOTH
FBgn0040765	FBgn0032151	FBgn0040765	BOTH
FBgn0083228	FBgn0024841	FBgn0083228	BOTH
FBgn0066084	FBgn0015766	FBgn0066084	FEMALE
FBgn0031299	FBgn0004168	FBgn0031299	BOTH
FBgn0250867	FBgn0013718	FBgn0250867	BOTH
FBgn0265595	FBgn0066101	FBgn0265595	BOTH
FBgn0263257	FBgn0030272	FBgn0263257	FEMALE
FBgn0036725	FBgn0052521	FBgn0036725	BOTH
FBgn0003091	FBgn0033159	FBgn0003091	FEMALE
FBgn0026160	FBgn0283651	FBgn0026160	FEMALE
FBgn0014163	FBgn0004198	FBgn0014163	FEMALE
FBgn0259234	FBgn0040765	FBgn0259234	FEMALE
FBgn0036801	FBgn0035756	FBgn0036801	BOTH
FBgn0051163	FBgn0262160	FBgn0051163	BOTH
FBgn0029123	FBgn0263219	FBgn0029123	BOTH
FBgn0085399	FBgn0015777	FBgn0085399	BOTH
FBgn0002643	FBgn0050361	FBgn0002643	FEMALE
FBgn0052206	FBgn0264000	FBgn0052206	BOTH
	FBgn0030174	FBgn0004047	MALE
	FBgn0261999	FBgn0260429	MALE
	FBgn0034286	FBgn0002945	MALE
	FBgn0262614	FBgn0036821	MALE
	FBgn0261556	FBgn0011693	MALE
	FBgn0035495	FBgn0037015	MALE
	FBgn0283451	FBgn0024321	MALE
	FBgn0011582	FBgn0087002	MALE
	FBgn0262473	FBgn0285926	MALE
	FBgn0065099	FBgn0052066	MALE
	FBgn0264975	FBgn0285963	MALE
	FBgn0038980	FBgn0020269	MALE
	FBgn0004607	FBgn0263773	MALE
	FBgn0031016	FBgn0052683	MALE
	FBgn0031971	FBgn0052626	MALE
	FBgn0085409	FBgn0010452	MALE
	FBgn0042696	FBgn0086604	MALE
	FBgn0033544	FBgn0032666	MALE
	FBgn0004885	FBgn0261588	MALE
	FBgn0033368	FBgn0000659	MALE
	FBgn0259243	FBgn0259677	MALE
	FBgn0033403	FBgn0261509	MALE
	FBgn0264273	FBgn0261698	MALE
	FBgn0030158	FBgn0031738	MALE
	FBgn0033268	FBgn0264090	MALE
	FBgn0023534	FBgn0045038	MALE
	FBgn0261046	FBgn0019662	MALE
	FBgn0261649	FBgn0019650	MALE
	FBgn0033405	FBgn0000097	MALE
	FBgn0028369	FBgn0051814	MALE
	FBgn0013733	FBgn0003499	MALE
	FBgn0051361	FBgn0000179	MALE
	FBgn0265595	FBgn0031530	MALE
	FBgn0053639	FBgn0032151	MALE
	FBgn0005771	FBgn0024841	MALE
	FBgn0259212	FBgn0015766	MALE
	FBgn0040532	FBgn0004168	MALE
	FBgn0000567	FBgn0013718	MALE
	FBgn0086680	FBgn0066101	MALE
	FBgn0050463	FBgn0030272	MALE
	FBgn0031770	FBgn0033159	MALE
	FBgn0085412	FBgn0283651	MALE
	FBgn0004858	FBgn0004198	MALE
	FBgn0052206	FBgn0035756	MALE
	FBgn0261285	FBgn0262160	MALE
	FBgn0038542	FBgn0263219	MALE
	FBgn0053143	FBgn0050361	MALE
	FBgn0031306	FBgn0030174	MALE
	FBgn0011661	FBgn0261999	MALE
	FBgn0000303	FBgn0034286	MALE
	FBgn0262593	FBgn0262614	MALE
	FBgn0085420	FBgn0261556	MALE
	FBgn0051092	FBgn0035495	MALE
	FBgn0051619	FBgn0283451	MALE
	FBgn0037676	FBgn0011582	MALE
	FBgn0031736	FBgn0264975	MALE
	FBgn0039349	FBgn0038980	MALE
	FBgn0261258	FBgn0004607	MALE
	FBgn0039209	FBgn0031016	MALE
	FBgn0008636	FBgn0031971	MALE
	FBgn0010313	FBgn0085409	MALE
	FBgn0286778	FBgn0033544	MALE
	FBgn0052183	FBgn0004885	MALE
	FBgn0259213	FBgn0033368	MALE
	FBgn0264908	FBgn0259243	MALE
	FBgn0261113	FBgn0264273	MALE
	FBgn0029123	FBgn0030158	MALE
	FBgn0032629	FBgn0033268	MALE
	FBgn0040726	FBgn0023534	MALE
	FBgn0019985	FBgn0261046	MALE
	FBgn0052204	FBgn0033405	MALE
	FBgn0004595	FBgn0028369	MALE
	FBgn0035041	FBgn0013733	MALE
	FBgn0036725	FBgn0051361	MALE
	FBgn0031374	FBgn0053639	MALE
	FBgn0003651	FBgn0005771	MALE
	FBgn0085384	FBgn0259212	MALE
	FBgn0260941	FBgn0040532	MALE
	FBgn0085447	FBgn0000567	MALE
	FBgn0000121	FBgn0086680	MALE
	FBgn0260462	FBgn0050463	MALE
	FBgn0053543	FBgn0031770	MALE
	FBgn0028644	FBgn0085412	MALE
	FBgn0263930	FBgn0004858	MALE
	FBgn0051221	FBgn0261285	MALE
	FBgn0024944	FBgn0038542	MALE
	FBgn0284243	FBgn0053143	MALE
	FBgn0250869	FBgn0031306	MALE
	FBgn0015229	FBgn0011661	MALE
	FBgn0265182	FBgn0000303	MALE
	FBgn0015519	FBgn0262593	MALE
	FBgn0028645	FBgn0085420	MALE
	FBgn0267579	FBgn0051092	MALE
	FBgn0264339	FBgn0051619	MALE
	FBgn0261928	FBgn0037676	MALE
	FBgn0004514	FBgn0031736	MALE
	FBgn0031414	FBgn0039349	MALE
	FBgn0027598	FBgn0261258	MALE
	FBgn0085382	FBgn0008636	MALE
	FBgn0260442	FBgn0010313	MALE
	FBgn0266851	FBgn0286778	MALE
	FBgn0039420	FBgn0052183	MALE
	FBgn0031897	FBgn0259213	MALE
	FBgn0011818	FBgn0264908	MALE
	FBgn0011666	FBgn0261113	MALE
	FBgn0001085	FBgn0032629	MALE
	FBgn0263994	FBgn0040726	MALE
	FBgn0264442	FBgn0019985	MALE
	FBgn0002023	FBgn0052204	MALE
	FBgn0052406	FBgn0004595	MALE
	FBgn0260753	FBgn0035041	MALE
	FBgn0000636	FBgn0031374	MALE
	FBgn0243512	FBgn0003651	MALE
	FBgn0033446	FBgn0085384	MALE
	FBgn0085370	FBgn0260941	MALE
	FBgn0250910	FBgn0000121	MALE
	FBgn0085399	FBgn0260462	MALE
	FBgn0284245	FBgn0053543	MALE
	FBgn0038498	FBgn0028644	MALE
	FBgn0034753	FBgn0263930	MALE
	FBgn0265598	FBgn0051221	MALE
	FBgn0030505	FBgn0024944	MALE
	FBgn0259244	FBgn0284243	MALE
	FBgn0036381	FBgn0250869	MALE
	FBgn0259242	FBgn0015229	MALE
	FBgn0260793	FBgn0265182	MALE
	FBgn0023179	FBgn0028645	MALE
	FBgn0040397	FBgn0267579	MALE
	FBgn0033192	FBgn0264339	MALE
	FBgn0262509	FBgn0261928	MALE
	FBgn0000422	FBgn0004514	MALE
	FBgn0259170	FBgn0031414	MALE
	FBgn0000635	FBgn0027598	MALE
	FBgn0003896	FBgn0085382	MALE
	FBgn0259111	FBgn0266851	MALE
		FBgn0039420	MALE
		FBgn0031897	MALE
		FBgn0011818	MALE
		FBgn0264442	MALE
		FBgn0002023	MALE
		FBgn0052406	MALE
		FBgn0000636	MALE
		FBgn0243512	MALE
		FBgn0033446	MALE
		FBgn0085370	MALE
		FBgn0250910	MALE
		FBgn0284245	MALE
		FBgn0038498	MALE
		FBgn0034753	MALE
		FBgn0265598	MALE
		FBgn0030505	MALE
		FBgn0259244	MALE
		FBgn0036381	MALE
		FBgn0259242	MALE
		FBgn0260793	MALE
		FBgn0023179	MALE
		FBgn0040397	MALE
		FBgn0033192	MALE
		FBgn0262509	MALE
		FBgn0000422	MALE
		FBgn0000635	MALE
		FBgn0003896	MALE
		FBgn0259111	MALE

## Sheet: C4
Female	Male	Unique	Present
FBgn0019660	FBgn0019660	FBgn0019660	BOTH
FBgn0085753	FBgn0004047	FBgn0085753	FEMALE
FBgn0042696	FBgn0002940	FBgn0042696	FEMALE
FBgn0002868	FBgn0004652	FBgn0002868	FEMALE
FBgn0038246	FBgn0004619	FBgn0038246	FEMALE
FBgn0052057	FBgn0051690	FBgn0052057	BOTH
FBgn0003301	FBgn0013995	FBgn0003301	BOTH
FBgn0065099	FBgn0260429	FBgn0065099	BOTH
FBgn0052683	FBgn0052982	FBgn0052683	BOTH
FBgn0029768	FBgn0087002	FBgn0029768	BOTH
FBgn0013995	FBgn0029768	FBgn0013995	BOTH
FBgn0033987	FBgn0058469	FBgn0033987	BOTH
FBgn0038665	FBgn0026411	FBgn0038665	FEMALE
FBgn0265595	FBgn0011693	FBgn0265595	BOTH
FBgn0087012	FBgn0031424	FBgn0087012	BOTH
FBgn0058469	FBgn0083228	FBgn0058469	BOTH
FBgn0010300	FBgn0264753	FBgn0010300	FEMALE
FBgn0011693	FBgn0052057	FBgn0011693	BOTH
FBgn0051324	FBgn0002945	FBgn0051324	BOTH
FBgn0259170	FBgn0000659	FBgn0259170	FEMALE
FBgn0265052	FBgn0052683	FBgn0265052	FEMALE
FBgn0004395	FBgn0035050	FBgn0004395	BOTH
FBgn0000121	FBgn0000121	FBgn0000121	BOTH
FBgn0004910	FBgn0029824	FBgn0004910	FEMALE
FBgn0286778	FBgn0019662	FBgn0286778	FEMALE
FBgn0261262	FBgn0036789	FBgn0261262	FEMALE
FBgn0004652	FBgn0032666	FBgn0004652	BOTH
FBgn0015777	FBgn0040765	FBgn0015777	BOTH
FBgn0052206	FBgn0052066	FBgn0052206	FEMALE
FBgn0027356	FBgn0051163	FBgn0027356	FEMALE
FBgn0014163	FBgn0036801	FBgn0014163	FEMALE
FBgn0264000	FBgn0020621	FBgn0264000	BOTH
FBgn0039064	FBgn0260971	FBgn0039064	FEMALE
FBgn0004619	FBgn0066101	FBgn0004619	BOTH
FBgn0262160	FBgn0000179	FBgn0262160	BOTH
FBgn0283499	FBgn0000547	FBgn0283499	BOTH
FBgn0052982	FBgn0000028	FBgn0052982	BOTH
FBgn0019662	FBgn0262160	FBgn0019662	BOTH
FBgn0011666	FBgn0259677	FBgn0011666	BOTH
FBgn0000547	FBgn0087012	FBgn0000547	BOTH
FBgn0083950	FBgn0267519	FBgn0083950	FEMALE
FBgn0264308	FBgn0250867	FBgn0264308	FEMALE
FBgn0052521	FBgn0261260	FBgn0052521	BOTH
FBgn0083228	FBgn0030272	FBgn0083228	BOTH
FBgn0033403	FBgn0031299	FBgn0033403	BOTH
FBgn0085447	FBgn0283499	FBgn0085447	FEMALE
FBgn0019985	FBgn0031897	FBgn0019985	FEMALE
FBgn0051163	FBgn0086604	FBgn0051163	BOTH
FBgn0002940	FBgn0052626	FBgn0002940	BOTH
FBgn0260971	FBgn0051324	FBgn0260971	BOTH
FBgn0040765	FBgn0262473	FBgn0040765	BOTH
FBgn0015519	FBgn0085384	FBgn0015519	BOTH
FBgn0085413	FBgn0033405	FBgn0085413	FEMALE
FBgn0085399	FBgn0015229	FBgn0085399	BOTH
FBgn0004858	FBgn0264090	FBgn0004858	FEMALE
FBgn0031306	FBgn0265595	FBgn0031306	BOTH
FBgn0001186	FBgn0033403	FBgn0001186	FEMALE
FBgn0051221	FBgn0285926	FBgn0051221	FEMALE
FBgn0261988	FBgn0283651	FBgn0261988	BOTH
FBgn0003091	FBgn0270928	FBgn0003091	BOTH
FBgn0024189	FBgn0003301	FBgn0024189	FEMALE
FBgn0267668	FBgn0035495	FBgn0267668	FEMALE
FBgn0261260	FBgn0262782	FBgn0261260	BOTH
FBgn0259234	FBgn0003091	FBgn0259234	FEMALE
FBgn0051690	FBgn0264442	FBgn0051690	BOTH
FBgn0264975	FBgn0015777	FBgn0264975	FEMALE
FBgn0029824	FBgn0285963	FBgn0029824	BOTH
FBgn0086604	FBgn0024321	FBgn0086604	BOTH
FBgn0020269	FBgn0262614	FBgn0020269	FEMALE
FBgn0052204	FBgn0052698	FBgn0052204	FEMALE
FBgn0259111	FBgn0050463	FBgn0259111	FEMALE
FBgn0039209	FBgn0261698	FBgn0039209	BOTH
FBgn0031736	FBgn0037015	FBgn0031736	FEMALE
FBgn0250867	FBgn0260941	FBgn0250867	BOTH
FBgn0000567	FBgn0263930	FBgn0000567	BOTH
FBgn0031299	FBgn0086680	FBgn0031299	BOTH
FBgn0013718	FBgn0051814	FBgn0013718	BOTH
FBgn0035756	FBgn0261556	FBgn0035756	BOTH
FBgn0083975	FBgn0013718	FBgn0083975	FEMALE
FBgn0052677	FBgn0085426	FBgn0052677	FEMALE
FBgn0015774	FBgn0052521	FBgn0015774	FEMALE
FBgn0260003	FBgn0013733	FBgn0260003	FEMALE
FBgn0010263	FBgn0261588	FBgn0010263	FEMALE
FBgn0264574	FBgn0004595	FBgn0264574	FEMALE
FBgn0004449	FBgn0017590	FBgn0004449	FEMALE
FBgn0011818	FBgn0031530	FBgn0011818	FEMALE
FBgn0039420	FBgn0283451	FBgn0039420	FEMALE
FBgn0267910	FBgn0031738	FBgn0267910	BOTH
FBgn0029663	FBgn0264339	FBgn0029663	BOTH
FBgn0036935	FBgn0033159	FBgn0036935	FEMALE
FBgn0029939	FBgn0036725	FBgn0029939	FEMALE
FBgn0015229	FBgn0029663	FBgn0015229	BOTH
FBgn0263257	FBgn0014859	FBgn0263257	FEMALE
FBgn0267322	FBgn0035756	FBgn0267322	FEMALE
FBgn0013733	FBgn0000635	FBgn0013733	BOTH
FBgn0028369	FBgn0267910	FBgn0028369	BOTH
FBgn0030574	FBgn0031770	FBgn0030574	FEMALE
FBgn0050463	FBgn0003499	FBgn0050463	BOTH
FBgn0001091	FBgn0265182	FBgn0001091	FEMALE
FBgn0037153	FBgn0261113	FBgn0037153	BOTH
FBgn0259677	FBgn0033987	FBgn0259677	BOTH
FBgn0033356	FBgn0040532	FBgn0033356	FEMALE
FBgn0036789	FBgn0264000	FBgn0036789	BOTH
FBgn0033196	FBgn0004168	FBgn0033196	FEMALE
FBgn0263994	FBgn0001085	FBgn0263994	FEMALE
FBgn0264908	FBgn0030913	FBgn0264908	FEMALE
FBgn0085421	FBgn0038498	FBgn0085421	FEMALE
FBgn0033368	FBgn0261988	FBgn0033368	FEMALE
FBgn0040397	FBgn0011656	FBgn0040397	BOTH
FBgn0001078	FBgn0000037	FBgn0001078	FEMALE
FBgn0022382	FBgn0015519	FBgn0022382	FEMALE
	FBgn0261928	FBgn0004047	MALE
	FBgn0028369	FBgn0260429	MALE
	FBgn0004395	FBgn0087002	MALE
	FBgn0264503	FBgn0026411	MALE
	FBgn0261509	FBgn0031424	MALE
	FBgn0031306	FBgn0264753	MALE
	FBgn0032629	FBgn0002945	MALE
	FBgn0000567	FBgn0000659	MALE
	FBgn0243512	FBgn0035050	MALE
	FBgn0027589	FBgn0032666	MALE
	FBgn0039209	FBgn0052066	MALE
	FBgn0065099	FBgn0036801	MALE
	FBgn0037676	FBgn0020621	MALE
	FBgn0034753	FBgn0066101	MALE
	FBgn0263773	FBgn0000179	MALE
	FBgn0033446	FBgn0000028	MALE
	FBgn0085399	FBgn0267519	MALE
	FBgn0052183	FBgn0030272	MALE
	FBgn0040397	FBgn0031897	MALE
	FBgn0261046	FBgn0052626	MALE
	FBgn0037521	FBgn0262473	MALE
	FBgn0051361	FBgn0085384	MALE
	FBgn0000097	FBgn0033405	MALE
	FBgn0037153	FBgn0264090	MALE
	FBgn0034286	FBgn0285926	MALE
	FBgn0031971	FBgn0283651	MALE
	FBgn0053143	FBgn0270928	MALE
	FBgn0011666	FBgn0035495	MALE
	FBgn0260964	FBgn0262782	MALE
	FBgn0261258	FBgn0264442	MALE
	FBgn0027598	FBgn0285963	MALE
		FBgn0024321	MALE
		FBgn0262614	MALE
		FBgn0052698	MALE
		FBgn0261698	MALE
		FBgn0037015	MALE
		FBgn0260941	MALE
		FBgn0263930	MALE
		FBgn0086680	MALE
		FBgn0051814	MALE
		FBgn0261556	MALE
		FBgn0085426	MALE
		FBgn0261588	MALE
		FBgn0004595	MALE
		FBgn0017590	MALE
		FBgn0031530	MALE
		FBgn0283451	MALE
		FBgn0031738	MALE
		FBgn0264339	MALE
		FBgn0033159	MALE
		FBgn0036725	MALE
		FBgn0014859	MALE
		FBgn0000635	MALE
		FBgn0031770	MALE
		FBgn0003499	MALE
		FBgn0265182	MALE
		FBgn0261113	MALE
		FBgn0040532	MALE
		FBgn0004168	MALE
		FBgn0001085	MALE
		FBgn0030913	MALE
		FBgn0038498	MALE
		FBgn0011656	MALE
		FBgn0000037	MALE
		FBgn0261928	MALE
		FBgn0264503	MALE
		FBgn0261509	MALE
		FBgn0032629	MALE
		FBgn0243512	MALE
		FBgn0027589	MALE
		FBgn0037676	MALE
		FBgn0034753	MALE
		FBgn0263773	MALE
		FBgn0033446	MALE
		FBgn0052183	MALE
		FBgn0261046	MALE
		FBgn0037521	MALE
		FBgn0051361	MALE
		FBgn0000097	MALE
		FBgn0034286	MALE
		FBgn0031971	MALE
		FBgn0053143	MALE
		FBgn0260964	MALE
		FBgn0261258	MALE
		FBgn0027598	MALE

## Sheet: C5
Female	Male	Unique	Present
FBgn0019660	FBgn0019660	FBgn0019660	BOTH
FBgn0013688	FBgn0004047	FBgn0013688	FEMALE
FBgn0085753	FBgn0087002	FBgn0085753	FEMALE
FBgn0002940	FBgn0058469	FBgn0002940	BOTH
FBgn0004595	FBgn0267519	FBgn0004595	BOTH
FBgn0000121	FBgn0050115	FBgn0000121	FEMALE
FBgn0052683	FBgn0260429	FBgn0052683	BOTH
FBgn0036789	FBgn0052057	FBgn0036789	BOTH
FBgn0065099	FBgn0036789	FBgn0065099	FEMALE
FBgn0003301	FBgn0002940	FBgn0003301	FEMALE
FBgn0038641	FBgn0036821	FBgn0038641	FEMALE
FBgn0260971	FBgn0052683	FBgn0260971	BOTH
FBgn0058469	FBgn0083228	FBgn0058469	BOTH
FBgn0052057	FBgn0052626	FBgn0052057	BOTH
FBgn0050361	FBgn0037963	FBgn0050361	FEMALE
FBgn0261260	FBgn0052982	FBgn0261260	BOTH
FBgn0013995	FBgn0051690	FBgn0013995	BOTH
FBgn0052982	FBgn0035495	FBgn0052982	BOTH
FBgn0031294	FBgn0283499	FBgn0031294	FEMALE
FBgn0264794	FBgn0004619	FBgn0264794	FEMALE
FBgn0004619	FBgn0002543	FBgn0004619	BOTH
FBgn0033987	FBgn0015766	FBgn0033987	BOTH
FBgn0038246	FBgn0004595	FBgn0038246	FEMALE
FBgn0052206	FBgn0020621	FBgn0052206	FEMALE
FBgn0283651	FBgn0262473	FBgn0283651	BOTH
FBgn0028888	FBgn0038542	FBgn0028888	FEMALE
FBgn0085399	FBgn0037475	FBgn0085399	FEMALE
FBgn0013718	FBgn0002945	FBgn0013718	FEMALE
FBgn0001234	FBgn0250867	FBgn0001234	BOTH
FBgn0259170	FBgn0040877	FBgn0259170	FEMALE
FBgn0052521	FBgn0029768	FBgn0052521	BOTH
FBgn0033368	FBgn0086604	FBgn0033368	FEMALE
FBgn0023095	FBgn0260971	FBgn0023095	FEMALE
FBgn0029768	FBgn0000636	FBgn0029768	BOTH
FBgn0262473	FBgn0052066	FBgn0262473	BOTH
FBgn0026411	FBgn0016797	FBgn0026411	FEMALE
FBgn0004652	FBgn0283651	FBgn0004652	FEMALE
FBgn0267001	FBgn0264442	FBgn0267001	FEMALE
FBgn0042696	FBgn0052521	FBgn0042696	FEMALE
FBgn0004573	FBgn0264753	FBgn0004573	BOTH
FBgn0265194	FBgn0087012	FBgn0265194	FEMALE
FBgn0004395	FBgn0264090	FBgn0004395	BOTH
FBgn0085426	FBgn0004573	FBgn0085426	FEMALE
FBgn0260442	FBgn0031299	FBgn0260442	FEMALE
FBgn0264753	FBgn0031738	FBgn0264753	BOTH
FBgn0259677	FBgn0033268	FBgn0259677	FEMALE
FBgn0004168	FBgn0261260	FBgn0004168	FEMALE
FBgn0262614	FBgn0053696	FBgn0262614	FEMALE
FBgn0265052	FBgn0285926	FBgn0265052	FEMALE
FBgn0004882	FBgn0014859	FBgn0004882	FEMALE
FBgn0261090	FBgn0051475	FBgn0261090	FEMALE
FBgn0001229	FBgn0267431	FBgn0001229	FEMALE
	FBgn0004395	FBgn0004047	MALE
	FBgn0019662	FBgn0087002	MALE
	FBgn0033159	FBgn0267519	MALE
	FBgn0267322	FBgn0050115	MALE
	FBgn0015400	FBgn0260429	MALE
	FBgn0013995	FBgn0036821	MALE
	FBgn0283451	FBgn0083228	MALE
	FBgn0033987	FBgn0052626	MALE
	FBgn0085385	FBgn0037963	MALE
	FBgn0032666	FBgn0051690	MALE
	FBgn0261588	FBgn0035495	MALE
	FBgn0085370	FBgn0283499	MALE
	FBgn0024150	FBgn0002543	MALE
	FBgn0263773	FBgn0015766	MALE
	FBgn0259108	FBgn0020621	MALE
	FBgn0040765	FBgn0038542	MALE
	FBgn0001234	FBgn0037475	MALE
		FBgn0002945	MALE
		FBgn0250867	MALE
		FBgn0040877	MALE
		FBgn0086604	MALE
		FBgn0000636	MALE
		FBgn0052066	MALE
		FBgn0016797	MALE
		FBgn0264442	MALE
		FBgn0087012	MALE
		FBgn0264090	MALE
		FBgn0031299	MALE
		FBgn0031738	MALE
		FBgn0033268	MALE
		FBgn0053696	MALE
		FBgn0285926	MALE
		FBgn0014859	MALE
		FBgn0051475	MALE
		FBgn0267431	MALE
		FBgn0019662	MALE
		FBgn0033159	MALE
		FBgn0267322	MALE
		FBgn0015400	MALE
		FBgn0283451	MALE
		FBgn0085385	MALE
		FBgn0032666	MALE
		FBgn0261588	MALE
		FBgn0085370	MALE
		FBgn0024150	MALE
		FBgn0263773	MALE
		FBgn0259108	MALE
		FBgn0040765	MALE

## Sheet: C6
Female	Male	Unique	Present
FBgn0019660	FBgn0019660	FBgn0019660	BOTH
FBgn0085753	FBgn0004047	FBgn0085753	FEMALE
FBgn0013688	FBgn0051690	FBgn0013688	FEMALE
FBgn0011693	FBgn0052626	FBgn0011693	BOTH
FBgn0003301	FBgn0087002	FBgn0003301	BOTH
FBgn0033987	FBgn0260429	FBgn0033987	BOTH
FBgn0013995	FBgn0267519	FBgn0013995	BOTH
FBgn0052683	FBgn0004619	FBgn0052683	BOTH
FBgn0058469	FBgn0262636	FBgn0058469	BOTH
FBgn0052057	FBgn0002940	FBgn0052057	BOTH
FBgn0002940	FBgn0002945	FBgn0002940	BOTH
FBgn0004619	FBgn0260971	FBgn0004619	BOTH
FBgn0267910	FBgn0058469	FBgn0267910	FEMALE
FBgn0285879	FBgn0015766	FBgn0285879	FEMALE
FBgn0000121	FBgn0264090	FBgn0000121	BOTH
FBgn0042696	FBgn0031299	FBgn0042696	BOTH
FBgn0267322	FBgn0052057	FBgn0267322	BOTH
FBgn0033403	FBgn0052982	FBgn0033403	FEMALE
FBgn0038641	FBgn0285926	FBgn0038641	BOTH
FBgn0004395	FBgn0036821	FBgn0004395	BOTH
FBgn0038246	FBgn0283651	FBgn0038246	FEMALE
FBgn0004652	FBgn0260941	FBgn0004652	BOTH
FBgn0036789	FBgn0037963	FBgn0036789	BOTH
FBgn0051163	FBgn0052066	FBgn0051163	BOTH
FBgn0265595	FBgn0035050	FBgn0265595	BOTH
FBgn0052982	FBgn0085426	FBgn0052982	BOTH
FBgn0002868	FBgn0265595	FBgn0002868	FEMALE
FBgn0259170	FBgn0013995	FBgn0259170	BOTH
FBgn0260971	FBgn0250867	FBgn0260971	BOTH
FBgn0033356	FBgn0002543	FBgn0033356	FEMALE
FBgn0039209	FBgn0019662	FBgn0039209	BOTH
FBgn0010300	FBgn0040532	FBgn0010300	FEMALE
FBgn0014163	FBgn0031738	FBgn0014163	FEMALE
FBgn0026160	FBgn0085384	FBgn0026160	FEMALE
FBgn0039349	FBgn0087012	FBgn0039349	BOTH
FBgn0283499	FBgn0020621	FBgn0283499	BOTH
FBgn0036454	FBgn0264794	FBgn0036454	FEMALE
FBgn0000547	FBgn0264753	FBgn0000547	BOTH
FBgn0031306	FBgn0086604	FBgn0031306	BOTH
FBgn0019662	FBgn0285963	FBgn0019662	BOTH
FBgn0051814	FBgn0085420	FBgn0051814	BOTH
FBgn0083228	FBgn0032666	FBgn0083228	BOTH
FBgn0020269	FBgn0283499	FBgn0020269	BOTH
FBgn0037153	FBgn0030272	FBgn0037153	BOTH
FBgn0035050	FBgn0262473	FBgn0035050	BOTH
FBgn0029922	FBgn0261260	FBgn0029922	FEMALE
FBgn0035816	FBgn0263773	FBgn0035816	FEMALE
FBgn0085399	FBgn0029768	FBgn0085399	BOTH
FBgn0001091	FBgn0083228	FBgn0001091	BOTH
FBgn0085385	FBgn0040765	FBgn0085385	FEMALE
FBgn0013733	FBgn0000659	FBgn0013733	BOTH
FBgn0260943	FBgn0013718	FBgn0260943	FEMALE
FBgn0065099	FBgn0030158	FBgn0065099	FEMALE
FBgn0083950	FBgn0032629	FBgn0083950	FEMALE
FBgn0265052	FBgn0031971	FBgn0265052	FEMALE
FBgn0261260	FBgn0004652	FBgn0261260	BOTH
FBgn0051324	FBgn0026411	FBgn0051324	BOTH
FBgn0250867	FBgn0004573	FBgn0250867	BOTH
FBgn0261649	FBgn0004168	FBgn0261649	BOTH
FBgn0052521	FBgn0035495	FBgn0052521	BOTH
FBgn0051760	FBgn0000028	FBgn0051760	BOTH
FBgn0051690	FBgn0033987	FBgn0051690	BOTH
FBgn0027356	FBgn0036801	FBgn0027356	FEMALE
FBgn0039064	FBgn0053087	FBgn0039064	FEMALE
FBgn0086778	FBgn0261588	FBgn0086778	FEMALE
FBgn0023095	FBgn0004395	FBgn0023095	FEMALE
FBgn0031736	FBgn0264442	FBgn0031736	FEMALE
FBgn0267033	FBgn0002023	FBgn0267033	FEMALE
	FBgn0263219	FBgn0004047	MALE
	FBgn0003499	FBgn0052626	MALE
	FBgn0036789	FBgn0087002	MALE
	FBgn0261988	FBgn0260429	MALE
	FBgn0052683	FBgn0267519	MALE
	FBgn0051324	FBgn0262636	MALE
	FBgn0011693	FBgn0002945	MALE
	FBgn0028369	FBgn0015766	MALE
	FBgn0259677	FBgn0264090	MALE
	FBgn0086680	FBgn0031299	MALE
	FBgn0261999	FBgn0285926	MALE
	FBgn0262614	FBgn0036821	MALE
	FBgn0031530	FBgn0283651	MALE
	FBgn0015229	FBgn0260941	MALE
	FBgn0015777	FBgn0037963	MALE
	FBgn0263706	FBgn0052066	MALE
	FBgn0020269	FBgn0085426	MALE
	FBgn0001090	FBgn0002543	MALE
	FBgn0011818	FBgn0040532	MALE
	FBgn0037153	FBgn0031738	MALE
	FBgn0267322	FBgn0085384	MALE
	FBgn0033268	FBgn0087012	MALE
	FBgn0024321	FBgn0020621	MALE
	FBgn0050463	FBgn0264794	MALE
	FBgn0261871	FBgn0264753	MALE
	FBgn0031770	FBgn0086604	MALE
	FBgn0261046	FBgn0285963	MALE
	FBgn0259213	FBgn0085420	MALE
	FBgn0000547	FBgn0032666	MALE
	FBgn0261698	FBgn0030272	MALE
	FBgn0086359	FBgn0262473	MALE
	FBgn0031424	FBgn0263773	MALE
	FBgn0033159	FBgn0029768	MALE
	FBgn0004595	FBgn0040765	MALE
	FBgn0033791	FBgn0000659	MALE
	FBgn0085397	FBgn0013718	MALE
	FBgn0030505	FBgn0030158	MALE
	FBgn0051163	FBgn0032629	MALE
	FBgn0039420	FBgn0031971	MALE
	FBgn0262160	FBgn0026411	MALE
	FBgn0011661	FBgn0004573	MALE
	FBgn0266756	FBgn0004168	MALE
	FBgn0038542	FBgn0035495	MALE
	FBgn0004607	FBgn0000028	MALE
	FBgn0033405	FBgn0036801	MALE
	FBgn0003301	FBgn0053087	MALE
	FBgn0052521	FBgn0261588	MALE
	FBgn0024841	FBgn0264442	MALE
	FBgn0004910	FBgn0002023	MALE
	FBgn0031897	FBgn0263219	MALE
	FBgn0260442	FBgn0003499	MALE
	FBgn0050361	FBgn0261988	MALE
	FBgn0011656	FBgn0028369	MALE
	FBgn0039209	FBgn0259677	MALE
	FBgn0052677	FBgn0086680	MALE
	FBgn0010434	FBgn0261999	MALE
	FBgn0013733	FBgn0262614	MALE
	FBgn0014859	FBgn0031530	MALE
	FBgn0052406	FBgn0015229	MALE
	FBgn0263930	FBgn0015777	MALE
	FBgn0038641	FBgn0263706	MALE
	FBgn0264975	FBgn0001090	MALE
	FBgn0031306	FBgn0011818	MALE
	FBgn0030574	FBgn0033268	MALE
	FBgn0051092	FBgn0024321	MALE
	FBgn0033544	FBgn0050463	MALE
	FBgn0013467	FBgn0261871	MALE
	FBgn0085370	FBgn0031770	MALE
	FBgn0000097	FBgn0261046	MALE
	FBgn0262782	FBgn0259213	MALE
	FBgn0085412	FBgn0261698	MALE
	FBgn0264273	FBgn0086359	MALE
	FBgn0033368	FBgn0031424	MALE
	FBgn0266100	FBgn0033159	MALE
	FBgn0261556	FBgn0004595	MALE
	FBgn0028370	FBgn0033791	MALE
	FBgn0037015	FBgn0085397	MALE
	FBgn0040153	FBgn0030505	MALE
	FBgn0031016	FBgn0039420	MALE
	FBgn0243512	FBgn0262160	MALE
	FBgn0030174	FBgn0011661	MALE
	FBgn0044328	FBgn0266756	MALE
	FBgn0052017	FBgn0038542	MALE
	FBgn0042696	FBgn0004607	MALE
	FBgn0261285	FBgn0033405	MALE
	FBgn0011224	FBgn0024841	MALE
	FBgn0000121	FBgn0004910	MALE
	FBgn0051814	FBgn0031897	MALE
	FBgn0035756	FBgn0260442	MALE
	FBgn0019985	FBgn0050361	MALE
	FBgn0043364	FBgn0011656	MALE
	FBgn0032151	FBgn0052677	MALE
	FBgn0004885	FBgn0010434	MALE
	FBgn0035041	FBgn0014859	MALE
	FBgn0031374	FBgn0052406	MALE
	FBgn0261509	FBgn0263930	MALE
	FBgn0264000	FBgn0264975	MALE
	FBgn0019643	FBgn0030574	MALE
	FBgn0027339	FBgn0051092	MALE
	FBgn0051760	FBgn0033544	MALE
	FBgn0270928	FBgn0013467	MALE
	FBgn0001091	FBgn0085370	MALE
	FBgn0029663	FBgn0000097	MALE
	FBgn0052206	FBgn0262782	MALE
	FBgn0039349	FBgn0085412	MALE
	FBgn0052183	FBgn0264273	MALE
	FBgn0036043	FBgn0033368	MALE
	FBgn0010452	FBgn0266100	MALE
	FBgn0036494	FBgn0261556	MALE
	FBgn0261649	FBgn0028370	MALE
	FBgn0050419	FBgn0037015	MALE
	FBgn0262738	FBgn0040153	MALE
	FBgn0036725	FBgn0031016	MALE
	FBgn0085399	FBgn0243512	MALE
	FBgn0259243	FBgn0030174	MALE
	FBgn0284245	FBgn0044328	MALE
	FBgn0005775	FBgn0052017	MALE
	FBgn0033446	FBgn0261285	MALE
	FBgn0038498	FBgn0011224	MALE
	FBgn0259170	FBgn0035756	MALE
	FBgn0036144	FBgn0019985	MALE
	FBgn0030913	FBgn0043364	MALE
	FBgn0029824	FBgn0032151	MALE
		FBgn0004885	MALE
		FBgn0035041	MALE
		FBgn0031374	MALE
		FBgn0261509	MALE
		FBgn0264000	MALE
		FBgn0019643	MALE
		FBgn0027339	MALE
		FBgn0270928	MALE
		FBgn0029663	MALE
		FBgn0052206	MALE
		FBgn0052183	MALE
		FBgn0036043	MALE
		FBgn0010452	MALE
		FBgn0036494	MALE
		FBgn0050419	MALE
		FBgn0262738	MALE
		FBgn0036725	MALE
		FBgn0259243	MALE
		FBgn0284245	MALE
		FBgn0005775	MALE
		FBgn0033446	MALE
		FBgn0038498	MALE
		FBgn0036144	MALE
		FBgn0030913	MALE
		FBgn0029824	MALE

## Sheet: C7
Female	Male	Unique	Present
FBgn0019660	FBgn0019660	FBgn0019660	BOTH
FBgn0085753	FBgn0004047	FBgn0085753	FEMALE
FBgn0013688	FBgn0267519	FBgn0013688	FEMALE
FBgn0052057	FBgn0051690	FBgn0052057	BOTH
FBgn0058469	FBgn0087002	FBgn0058469	BOTH
FBgn0004595	FBgn0260429	FBgn0004595	BOTH
FBgn0065099	FBgn0058469	FBgn0065099	FEMALE
FBgn0052982	FBgn0004619	FBgn0052982	BOTH
FBgn0003301	FBgn0002940	FBgn0003301	FEMALE
FBgn0002940	FBgn0052982	FBgn0002940	BOTH
FBgn0029768	FBgn0050115	FBgn0029768	BOTH
FBgn0033356	FBgn0052521	FBgn0033356	FEMALE
FBgn0036789	FBgn0004652	FBgn0036789	FEMALE
FBgn0085399	FBgn0002543	FBgn0085399	FEMALE
FBgn0000121	FBgn0015766	FBgn0000121	FEMALE
FBgn0004652	FBgn0035050	FBgn0004652	BOTH
FBgn0038641	FBgn0250867	FBgn0038641	FEMALE
FBgn0085420	FBgn0037963	FBgn0085420	FEMALE
FBgn0051619	FBgn0036821	FBgn0051619	FEMALE
FBgn0004619	FBgn0052626	FBgn0004619	BOTH
FBgn0053087	FBgn0004595	FBgn0053087	FEMALE
FBgn0261649	FBgn0051092	FBgn0261649	FEMALE
FBgn0038246	FBgn0030272	FBgn0038246	FEMALE
FBgn0001226	FBgn0004168	FBgn0001226	FEMALE
FBgn0264753	FBgn0030158	FBgn0264753	FEMALE
	FBgn0029768	FBgn0004047	MALE
	FBgn0037676	FBgn0267519	MALE
	FBgn0285926	FBgn0051690	MALE
	FBgn0052057	FBgn0087002	MALE
	FBgn0040153	FBgn0260429	MALE
	FBgn0031299	FBgn0050115	MALE
	FBgn0264090	FBgn0052521	MALE
	FBgn0050463	FBgn0002543	MALE
	FBgn0024321	FBgn0015766	MALE
	FBgn0083228	FBgn0035050	MALE
	FBgn0087012	FBgn0250867	MALE
	FBgn0004607	FBgn0037963	MALE
	FBgn0041605	FBgn0036821	MALE
	FBgn0031971	FBgn0052626	MALE
	FBgn0086604	FBgn0051092	MALE
	FBgn0052683	FBgn0030272	MALE
	FBgn0019985	FBgn0004168	MALE
	FBgn0036801	FBgn0030158	MALE
	FBgn0013995	FBgn0037676	MALE
	FBgn0052066	FBgn0285926	MALE
	FBgn0019662	FBgn0040153	MALE
	FBgn0020269	FBgn0031299	MALE
	FBgn0013718	FBgn0264090	MALE
	FBgn0004880	FBgn0050463	MALE
	FBgn0263219	FBgn0024321	MALE
		FBgn0083228	MALE
		FBgn0087012	MALE
		FBgn0004607	MALE
		FBgn0041605	MALE
		FBgn0031971	MALE
		FBgn0086604	MALE
		FBgn0052683	MALE
		FBgn0019985	MALE
		FBgn0036801	MALE
		FBgn0013995	MALE
		FBgn0052066	MALE
		FBgn0019662	MALE
		FBgn0020269	MALE
		FBgn0013718	MALE
		FBgn0004880	MALE
		FBgn0263219	MALE

## Sheet: C8
Female	Male	Unique	Present
FBgn0019660	FBgn0019660	FBgn0019660	BOTH
FBgn0002868	FBgn0004047	FBgn0002868	BOTH
FBgn0085753	FBgn0004652	FBgn0085753	FEMALE
FBgn0011693	FBgn0002940	FBgn0011693	BOTH
FBgn0259170	FBgn0052982	FBgn0259170	FEMALE
FBgn0052683	FBgn0087002	FBgn0052683	BOTH
FBgn0265052	FBgn0004619	FBgn0265052	FEMALE
FBgn0004652	FBgn0259677	FBgn0004652	BOTH
FBgn0264753	FBgn0002945	FBgn0264753	BOTH
FBgn0033987	FBgn0052057	FBgn0033987	BOTH
FBgn0265595	FBgn0029768	FBgn0265595	BOTH
FBgn0029824	FBgn0004595	FBgn0029824	BOTH
FBgn0038246	FBgn0051690	FBgn0038246	FEMALE
FBgn0065099	FBgn0058469	FBgn0065099	BOTH
FBgn0003301	FBgn0002543	FBgn0003301	BOTH
FBgn0261953	FBgn0035050	FBgn0261953	FEMALE
FBgn0004395	FBgn0260429	FBgn0004395	BOTH
FBgn0042696	FBgn0015229	FBgn0042696	FEMALE
FBgn0261988	FBgn0083228	FBgn0261988	BOTH
FBgn0260753	FBgn0052683	FBgn0260753	FEMALE
FBgn0086778	FBgn0051646	FBgn0086778	FEMALE
FBgn0029768	FBgn0052626	FBgn0029768	BOTH
FBgn0002940	FBgn0040532	FBgn0002940	BOTH
FBgn0010300	FBgn0011693	FBgn0010300	FEMALE
FBgn0038665	FBgn0031738	FBgn0038665	FEMALE
FBgn0058469	FBgn0267910	FBgn0058469	BOTH
FBgn0261262	FBgn0052521	FBgn0261262	FEMALE
FBgn0051324	FBgn0283499	FBgn0051324	BOTH
FBgn0039209	FBgn0033987	FBgn0039209	FEMALE
FBgn0052982	FBgn0030258	FBgn0052982	BOTH
FBgn0013995	FBgn0086604	FBgn0013995	FEMALE
FBgn0052057	FBgn0001090	FBgn0052057	BOTH
FBgn0261260	FBgn0030158	FBgn0261260	BOTH
FBgn0004619	FBgn0003499	FBgn0004619	BOTH
FBgn0052206	FBgn0027339	FBgn0052206	FEMALE
FBgn0003997	FBgn0266801	FBgn0003997	FEMALE
FBgn0022382	FBgn0262160	FBgn0022382	FEMALE
FBgn0004852	FBgn0260941	FBgn0004852	FEMALE
FBgn0267668	FBgn0261260	FBgn0267668	FEMALE
FBgn0260971	FBgn0015766	FBgn0260971	BOTH
FBgn0283499	FBgn0250867	FBgn0283499	BOTH
FBgn0028369	FBgn0051163	FBgn0028369	BOTH
FBgn0031306	FBgn0004168	FBgn0031306	BOTH
FBgn0085399	FBgn0036789	FBgn0085399	FEMALE
FBgn0264308	FBgn0031897	FBgn0264308	BOTH
FBgn0052521	FBgn0263994	FBgn0052521	BOTH
FBgn0015777	FBgn0011818	FBgn0015777	BOTH
FBgn0260442	FBgn0040765	FBgn0260442	FEMALE
FBgn0002543	FBgn0267253	FBgn0002543	BOTH
FBgn0032629	FBgn0024321	FBgn0032629	BOTH
FBgn0028644	FBgn0265595	FBgn0028644	BOTH
FBgn0001085	FBgn0031424	FBgn0001085	FEMALE
FBgn0029663	FBgn0051324	FBgn0029663	BOTH
FBgn0033356	FBgn0261285	FBgn0033356	FEMALE
FBgn0020269	FBgn0050463	FBgn0020269	FEMALE
FBgn0051092	FBgn0033403	FBgn0051092	FEMALE
FBgn0019662	FBgn0004573	FBgn0019662	BOTH
FBgn0039064	FBgn0085426	FBgn0039064	FEMALE
FBgn0000028	FBgn0087012	FBgn0000028	FEMALE
FBgn0262473	FBgn0050361	FBgn0262473	FEMALE
FBgn0015229	FBgn0036801	FBgn0015229	BOTH
FBgn0000121	FBgn0052066	FBgn0000121	FEMALE
FBgn0085426	FBgn0260971	FBgn0085426	BOTH
FBgn0083228	FBgn0015777	FBgn0083228	BOTH
FBgn0051163	FBgn0013718	FBgn0051163	BOTH
FBgn0033196	FBgn0031299	FBgn0033196	FEMALE
	FBgn0037015	FBgn0004047	MALE
	FBgn0085413	FBgn0087002	MALE
	FBgn0085400	FBgn0259677	MALE
	FBgn0037153	FBgn0002945	MALE
	FBgn0085382	FBgn0004595	MALE
	FBgn0030272	FBgn0051690	MALE
	FBgn0038542	FBgn0035050	MALE
	FBgn0029824	FBgn0260429	MALE
	FBgn0263219	FBgn0051646	MALE
	FBgn0019662	FBgn0052626	MALE
	FBgn0035756	FBgn0040532	MALE
	FBgn0261698	FBgn0031738	MALE
	FBgn0028407	FBgn0267910	MALE
	FBgn0031374	FBgn0030258	MALE
	FBgn0000179	FBgn0086604	MALE
	FBgn0027598	FBgn0001090	MALE
	FBgn0003301	FBgn0030158	MALE
	FBgn0261988	FBgn0003499	MALE
	FBgn0019650	FBgn0027339	MALE
	FBgn0000567	FBgn0266801	MALE
	FBgn0029663	FBgn0262160	MALE
	FBgn0259821	FBgn0260941	MALE
	FBgn0053087	FBgn0015766	MALE
	FBgn0004509	FBgn0250867	MALE
	FBgn0065099	FBgn0004168	MALE
	FBgn0031770	FBgn0036789	MALE
	FBgn0264308	FBgn0031897	MALE
	FBgn0263773	FBgn0263994	MALE
	FBgn0085384	FBgn0011818	MALE
	FBgn0000659	FBgn0040765	MALE
	FBgn0032629	FBgn0267253	MALE
	FBgn0285963	FBgn0024321	MALE
	FBgn0028369	FBgn0031424	MALE
	FBgn0032666	FBgn0261285	MALE
	FBgn0264000	FBgn0050463	MALE
	FBgn0264753	FBgn0033403	MALE
	FBgn0263930	FBgn0004573	MALE
	FBgn0264442	FBgn0087012	MALE
	FBgn0033268	FBgn0050361	MALE
	FBgn0028644	FBgn0036801	MALE
	FBgn0002868	FBgn0052066	MALE
	FBgn0023534	FBgn0013718	MALE
	FBgn0028370	FBgn0031299	MALE
	FBgn0033544	FBgn0037015	MALE
	FBgn0031971	FBgn0085413	MALE
	FBgn0000547	FBgn0085400	MALE
	FBgn0263289	FBgn0037153	MALE
	FBgn0033159	FBgn0085382	MALE
	FBgn0052406	FBgn0030272	MALE
	FBgn0004395	FBgn0038542	MALE
	FBgn0033108	FBgn0263219	MALE
	FBgn0267322	FBgn0035756	MALE
	FBgn0004607	FBgn0261698	MALE
	FBgn0031306	FBgn0028407	MALE
		FBgn0031374	MALE
		FBgn0000179	MALE
		FBgn0027598	MALE
		FBgn0019650	MALE
		FBgn0000567	MALE
		FBgn0259821	MALE
		FBgn0053087	MALE
		FBgn0004509	MALE
		FBgn0031770	MALE
		FBgn0263773	MALE
		FBgn0085384	MALE
		FBgn0000659	MALE
		FBgn0285963	MALE
		FBgn0032666	MALE
		FBgn0264000	MALE
		FBgn0263930	MALE
		FBgn0264442	MALE
		FBgn0033268	MALE
		FBgn0023534	MALE
		FBgn0028370	MALE
		FBgn0033544	MALE
		FBgn0031971	MALE
		FBgn0000547	MALE
		FBgn0263289	MALE
		FBgn0033159	MALE
		FBgn0052406	MALE
		FBgn0033108	MALE
		FBgn0267322	MALE
		FBgn0004607	MALE

## Sheet: C9
Female	Male	Unique	Present
FBgn0019660	FBgn0019660	FBgn0019660	BOTH
FBgn0085753	FBgn0004047	FBgn0085753	FEMALE
FBgn0013688	FBgn0267519	FBgn0013688	FEMALE
FBgn0002940	FBgn0260429	FBgn0002940	BOTH
FBgn0033987	FBgn0035495	FBgn0033987	BOTH
FBgn0004573	FBgn0058469	FBgn0004573	BOTH
FBgn0052683	FBgn0052982	FBgn0052683	FEMALE
FBgn0029768	FBgn0087002	FBgn0029768	BOTH
FBgn0011693	FBgn0036821	FBgn0011693	BOTH
FBgn0004395	FBgn0051690	FBgn0004395	BOTH
FBgn0259170	FBgn0051324	FBgn0259170	FEMALE
FBgn0261953	FBgn0030258	FBgn0261953	FEMALE
FBgn0004516	FBgn0261588	FBgn0004516	BOTH
FBgn0003301	FBgn0262636	FBgn0003301	BOTH
FBgn0013718	FBgn0250867	FBgn0013718	FEMALE
FBgn0029824	FBgn0259677	FBgn0029824	FEMALE
FBgn0265416	FBgn0029768	FBgn0265416	FEMALE
FBgn0033403	FBgn0264090	FBgn0033403	FEMALE
FBgn0264753	FBgn0083228	FBgn0264753	BOTH
FBgn0085399	FBgn0033987	FBgn0085399	FEMALE
FBgn0004652	FBgn0031299	FBgn0004652	BOTH
FBgn0085413	FBgn0036789	FBgn0085413	FEMALE
FBgn0283651	FBgn0002945	FBgn0283651	BOTH
FBgn0042696	FBgn0011693	FBgn0042696	FEMALE
FBgn0038246	FBgn0052626	FBgn0038246	FEMALE
FBgn0052521	FBgn0013995	FBgn0052521	FEMALE
FBgn0013995	FBgn0004449	FBgn0013995	BOTH
FBgn0052057	FBgn0015766	FBgn0052057	BOTH
FBgn0001225	FBgn0037963	FBgn0001225	FEMALE
FBgn0065099	FBgn0004607	FBgn0065099	FEMALE
FBgn0085397	FBgn0283651	FBgn0085397	FEMALE
FBgn0058469	FBgn0040532	FBgn0058469	BOTH
FBgn0033356	FBgn0264753	FBgn0033356	FEMALE
FBgn0260442	FBgn0052066	FBgn0260442	FEMALE
FBgn0025382	FBgn0032797	FBgn0025382	FEMALE
FBgn0020621	FBgn0263773	FBgn0020621	BOTH
FBgn0031016	FBgn0265598	FBgn0031016	BOTH
FBgn0260971	FBgn0285963	FBgn0260971	BOTH
	FBgn0260941	FBgn0004047	MALE
	FBgn0085384	FBgn0267519	MALE
	FBgn0020269	FBgn0260429	MALE
	FBgn0020621	FBgn0035495	MALE
	FBgn0262614	FBgn0052982	MALE
	FBgn0052057	FBgn0087002	MALE
	FBgn0040726	FBgn0036821	MALE
	FBgn0029663	FBgn0051690	MALE
	FBgn0261260	FBgn0051324	MALE
	FBgn0033405	FBgn0030258	MALE
	FBgn0030913	FBgn0261588	MALE
	FBgn0050115	FBgn0262636	MALE
	FBgn0010452	FBgn0250867	MALE
	FBgn0030158	FBgn0259677	MALE
	FBgn0002940	FBgn0264090	MALE
	FBgn0039209	FBgn0083228	MALE
	FBgn0004573	FBgn0031299	MALE
	FBgn0053179	FBgn0036789	MALE
	FBgn0004652	FBgn0002945	MALE
	FBgn0051814	FBgn0052626	MALE
	FBgn0031738	FBgn0004449	MALE
	FBgn0001090	FBgn0015766	MALE
	FBgn0260971	FBgn0037963	MALE
	FBgn0051163	FBgn0004607	MALE
	FBgn0259789	FBgn0040532	MALE
	FBgn0003301	FBgn0052066	MALE
	FBgn0050463	FBgn0032797	MALE
	FBgn0283499	FBgn0263773	MALE
	FBgn0086680	FBgn0265598	MALE
	FBgn0261988	FBgn0285963	MALE
	FBgn0261509	FBgn0260941	MALE
	FBgn0085426	FBgn0085384	MALE
	FBgn0086359	FBgn0020269	MALE
	FBgn0038542	FBgn0262614	MALE
	FBgn0030272	FBgn0040726	MALE
	FBgn0024321	FBgn0029663	MALE
	FBgn0037941	FBgn0261260	MALE
	FBgn0000116	FBgn0033405	MALE
	FBgn0031016	FBgn0030913	MALE
	FBgn0028369	FBgn0050115	MALE
	FBgn0015777	FBgn0010452	MALE
	FBgn0002543	FBgn0030158	MALE
	FBgn0004619	FBgn0039209	MALE
	FBgn0033446	FBgn0053179	MALE
	FBgn0034638	FBgn0051814	MALE
	FBgn0000121	FBgn0031738	MALE
	FBgn0037015	FBgn0001090	MALE
	FBgn0087012	FBgn0051163	MALE
	FBgn0004516	FBgn0259789	MALE
	FBgn0085414	FBgn0050463	MALE
	FBgn0004395	FBgn0283499	MALE
	FBgn0261113	FBgn0086680	MALE
	FBgn0031971	FBgn0261988	MALE
		FBgn0261509	MALE
		FBgn0085426	MALE
		FBgn0086359	MALE
		FBgn0038542	MALE
		FBgn0030272	MALE
		FBgn0024321	MALE
		FBgn0037941	MALE
		FBgn0000116	MALE
		FBgn0028369	MALE
		FBgn0015777	MALE
		FBgn0002543	MALE
		FBgn0004619	MALE
		FBgn0033446	MALE
		FBgn0034638	MALE
		FBgn0000121	MALE
		FBgn0037015	MALE
		FBgn0087012	MALE
		FBgn0085414	MALE
		FBgn0261113	MALE
		FBgn0031971	MALE

[truncated: 27 more sheets: C10, C11, C12, C13, C14, C15, C16, C17, C18, C19, C20, C21, C22, C23, C24, C25, C26, C27, C28, C29 …]
