# Supplementary material for: The Drosophila brain on cocaine at single-cell resolution
Source: Genome Res. 2021 Oct;31(10):1927–37. doi: 10.1101/gr.268037.120 (PMC8494231; doi:10.1101/gr.268037.120)
Supplement: Supplemental Material [file supp_gr.268037.120_Supplemental_Table_S10_xlsx.xlsx]

## Sheet: Table S8
Sex	Cluster	Reactome Pathway	# in REF	# in Input	expected	Fold Enrichment	raw P value	FDR
Male	16	Activation of AMPA receptors	2	2	0.01	> 100	0.000318	0.0295
		Serotonin receptors	8	3	0.06	50.61	6.11e-05	0.0106
		Amine ligand-binding receptors	15	5	0.11	44.99	2.77e-07	0.000193
		Class A/1 (Rhodopsin-like receptors)	27	6	0.2	29.99	1.29e-07	0.000179
		p75NTR regulates axonogenesis	14	3	0.1	28.92	0.000244	0.0261
		Axonal growth inhibition (RHOA activation)	14	3	0.1	28.92	0.000244	0.0242
		GPCR ligand binding	33	6	0.24	24.54	3.66e-07	0.00017
		Platelet homeostasis	17	3	0.13	23.82	0.000402	0.035
		Activation of NMDA receptor and postsynaptic events	18	3	0.13	22.5	0.000467	0.0382
		Regulation of insulin secretion	19	3	0.14	21.31	0.000537	0.0394
		G alpha (s) signalling events	35	4	0.26	15.43	0.000186	0.0216
		O-linked glycosylation	45	5	0.33	15	3.18e-05	0.00632
		Integration of energy metabolism	46	4	0.34	11.74	0.00049	0.0379
		G alpha (i) signalling events	88	6	0.65	9.2	6.59e-05	0.0102
		Signaling by GPCR	152	9	1.13	7.99	2.79e-06	0.000776
		Cargo recognition for clathrin-mediated endocytosis	107	6	0.79	7.57	0.000183	0.0231
		GPCR downstream signalling	146	8	1.08	7.4	1.75e-05	0.00405
		Neuronal System	147	7	1.09	6.43	0.000139	0.0193
		Clathrin-mediated endocytosis	135	6	1	6	0.0006	0.0418
	22	Signal Transduction	760	20	5.63	3.55	8.21e-07	0.000286
		NOTCH2 Activation and Transmission of Signal to the Nucleus	2	2	0.03	76.06	0.000988	0.055
		Signaling by NOTCH2	2	2	0.03	76.06	0.000988	0.0529
		Transcriptional activtion by phosphorylated DL/DIF dimer	2	2	0.03	76.06	0.000988	0.0509
		Degradation of GABA	2	2	0.03	76.06	0.000988	0.0491
		TAK1 activates NFkB by phosphorylation and activation of IKKs complex	5	3	0.07	45.64	0.000115	0.0399
		RIP-mediated NFkB activation via ZBP1	5	3	0.07	45.64	0.000115	0.0319
		TRAF6 mediated NF-kB activation	5	3	0.07	45.64	0.000115	0.0266
		ZBP1(DAI) mediated induction of type I IFNs	5	3	0.07	45.64	0.000115	0.0228
		DDX58/IFIH1-mediated induction of interferon-alpha/beta	5	3	0.07	45.64	0.000115	0.02
		DEx/H-box helicases activate type I IFN and inflammatory cytokines production	6	3	0.08	38.03	0.00017	0.0216
		Phosphorylated CACT, DL and DIF homodimers dissociate from the TL receptor 'signalling complex'	9	3	0.12	25.35	0.000434	0.0335
		DL and DIF homodimers complexed with CACT are all phosphorylated in the TL receptor 'signalling complex'	9	3	0.12	25.35	0.000434	0.0318
		DL and DIF homodimers bind to TUB and phosphorylated PLL in the TL receptor 'signalling complex'	9	3	0.12	25.35	0.000434	0.0302
		Cytosolic sensors of pathogen-associated DNA	10	3	0.13	22.82	0.000559	0.037
		Post-translational protein phosphorylation	56	6	0.74	8.15	0.000148	0.0229
		Regulation of Insulin-like Growth Factor (IGF) transport and uptake by Insulin-like Growth Factor Binding Proteins (IGFBPs)	56	6	0.74	8.15	0.000148	0.0206
		Toll-Like Receptors Cascades	65	6	0.85	7.02	0.000313	0.0363
		SRP-dependent cotranslational protein targeting to membrane	94	7	1.24	5.66	0.00034	0.0364
		Nonsense Mediated Decay (NMD) independent of the Exon Junction Complex (EJC)	95	7	1.25	5.6	0.000361	0.0335
		Formation of a pool of free 40S subunits	105	7	1.38	5.07	0.000636	0.0402
		Nonsense-Mediated Decay (NMD)	111	7	1.46	4.8	0.000867	0.0525
		Nonsense Mediated Decay (NMD) enhanced by the Exon Junction Complex (EJC)	111	7	1.46	4.8	0.000867	0.0503
		Cap-dependent Translation Initiation	128	8	1.68	4.75	0.000395	0.0344
		Eukaryotic Translation Initiation	128	8	1.68	4.75	0.000395	0.0323
		Transport of small molecules	447	16	5.88	2.72	0.000353	0.0351
		Signal Transduction	760	25	9.99	2.5	2.85e-05	0.0198
		Metabolism	1096	31	14.41	2.15	8.13e-05	0.0377
Female	11	Synthesis of IP2, IP, and Ins in the cytosol	14	3	0.02	> 100	2.71e-06	0.00383
		Inositol phosphate metabolism	38	3	0.06	47.3	4.13e-05	0.0293
	20	Synthesis of IP2, IP, and Ins in the cytosol	14	3	0.02	> 100	7.01e-07	0.000992
		Inositol phosphate metabolism	38	3	0.04	72.53	1.08e-05	0.00766
	30	TRP channels	7	2	0.01	> 100	1.7e-05	0.0241
		Antigen activates B Cell Receptor (BCR) leading to generation of second messengers	10	2	0.01	> 100	3.11e-05	0.022
